# Supplementary material for: The implicit and explicit attitudes of Chinese university students towards genetic modification
Source: Front Psychol. 2022 Nov 23;13:1014395. doi: 10.3389/fpsyg.2022.1014395 (PMC9728140; doi:10.3389/fpsyg.2022.1014395)
Supplement: Supplementary file 1 [file Table_1.XLSX]

## Sheet: Original data
Serial number	time	Source	Source Details	1、Your gender	2、Your age	3、Your educational level	4、Is your major related to biology?	5、Your acceptance of GM technology is	6、Your attitude towards the view that ""GM crops and foods have unpredictable consequences"" is	7、Your attitude towards the view that "There are ecological hazards of GM crops" is	8、Your attitude towards the view that "GM foods are potentially harmful to human health" is	9、Your attitude towards the view that "GM crops and foods can help solve the problem of global hunger" is	10、Your attitude towards the view that "The development of GM can provide cheaper food for consumers" is	11、Your attitude towards the view that "GM crops and foods can provide people with higher nutrition and value" is
1	168 sec.	Mobile Submit	Direct access	Male	19	Undergraduate	No	Neutral	Uncertain	Uncertain	Uncertain	Uncertain	Uncertain	Uncertain
2	224 sec.	Mobile Submit	Direct access	Female	19	Undergraduate	No	More supportive	Disagree	Disagree	Disagree	Agree	Agree	Agree
3	269 sec.	Mobile Submit	Direct access	Male	19	Undergraduate	No	More supportive	Disagree	Disagree	Disagree	Uncertain	Uncertain	Uncertain
4	306 sec.	Mobile Submit	Direct access	Female	22	Undergraduate	Yes	More supportive	Agree	Disagree	Disagree	Uncertain	Uncertain	Uncertain
5	391 sec.	Mobile Submit	Direct access	Female	18	Undergraduate	No	Neutral	Agree	Agree	Agree	Uncertain	Agree	Uncertain
6	91 sec.	Mobile Submit	Direct access	Female	18	Undergraduate	No	Neutral	Uncertain	Agree	Uncertain	Agree	Agree	Uncertain
7	407 sec.	Mobile Submit	Direct access	Female	20	Undergraduate	No	More objectionable	Agree	Agree	Agree	Agree	Agree	Agree
8	638 sec.	Mobile Submit	Direct access	Female	22	Undergraduate	No	More supportive	Agree	Uncertain	Uncertain	Agree	Agree	Agree
9	302 sec.	Mobile Submit	Direct access	Female	20	Undergraduate	No	Neutral	Uncertain	Uncertain	Agree	Uncertain	Uncertain	Agree
10	127 sec.	Mobile Submit	Direct access	Female	20	Undergraduate	No	Neutral	Uncertain	Uncertain	Agree	Agree	Uncertain	Disagree
11	276 sec.	Mobile Submit	Direct access	Female	19	Undergraduate	No	More supportive	Disagree	Disagree	Disagree	Agree	Uncertain	Uncertain
12	185 sec.	Mobile Submit	Direct access	Female	18	Undergraduate	No	Neutral	Uncertain	Uncertain	Uncertain	Agree	Disagree	Uncertain
13	260 sec.	Mobile Submit	Direct access	Female	23	Undergraduate	No	Highly objectionable	Agree	Agree	Agree	Uncertain	Uncertain	Uncertain
14	177 sec.	Mobile Submit	Direct access	Female	20	Undergraduate	No	Neutral	Agree	Uncertain	Agree	Agree	Agree	Uncertain
15	349 sec.	Mobile Submit	Direct access	Female	20	Undergraduate	No	Neutral	Agree	Disagree	Agree	Agree	Agree	Uncertain
16	311 sec.	Mobile Submit	Direct access	Female	20	Undergraduate	No	More supportive	Uncertain	Uncertain	Uncertain	Uncertain	Uncertain	Uncertain
17	856 sec.	Mobile Submit	Direct access	Male	20;	Undergraduate	Yes	Neutral	Uncertain	Uncertain	Uncertain	Agree	Agree	Agree
18	185 sec.	Mobile Submit	Direct access	Male	19	Undergraduate	No	Neutral	Agree	Uncertain	Agree	Agree	Agree	Agree
19	274 sec.	Mobile Submit	Direct access	Female	18	Undergraduate	No	Highly supportive	Disagree	Disagree	Disagree	Agree	Agree	Uncertain
20	365 sec.	Mobile Submit	Direct access	Female	18	Undergraduate	No	Neutral	Agree	Uncertain	Agree	Agree	Agree	Uncertain
21	250 sec.	Mobile Submit	Direct access	Male	23	Undergraduate	No	Neutral	Agree	Disagree	Agree	Agree	Agree	Uncertain
22	400 sec.	Mobile Submit	Direct access	Male	20	Undergraduate	No	Neutral	Agree	Agree	Disagree	Agree	Agree	Agree
23	506 sec.	Mobile Submit	Direct access	Male	20	Undergraduate	Yes	Neutral	Agree	Disagree	Uncertain	Agree	Agree	Uncertain
24	146 sec.	Mobile Submit	Direct access	Female	22	Undergraduate	No	Neutral	Agree	Uncertain	Uncertain	Uncertain	Uncertain	Disagree
25	100 sec.	Mobile Submit	Direct access	Male	20	Undergraduate	No	Neutral	Disagree	Uncertain	Uncertain	Uncertain	Agree	Uncertain
26	209 sec.	Mobile Submit	Direct access	Female	18	Undergraduate	No	Neutral	Uncertain	Uncertain	Uncertain	Agree	Agree	Uncertain
27	688 sec.	Mobile Submit	Direct access	Female	21	Undergraduate	No	More supportive	Disagree	Disagree	Uncertain	Agree	Agree	Agree
28	207 sec.	Mobile Submit	Direct access	Female	19	Undergraduate	Yes	Neutral	Uncertain	Uncertain	Uncertain	Uncertain	Uncertain	Uncertain
29	72 sec.	Mobile Submit	Direct access	Female	20	Undergraduate	No	More objectionable	Uncertain	Uncertain	Uncertain	Uncertain	Uncertain	Uncertain
30	312 sec.	Mobile Submit	Direct access	Female	20	Undergraduate	No	More supportive	Disagree	Uncertain	Disagree	Agree	Agree	Agree
31	868 sec.	Mobile Submit	Direct access	Female	20	Undergraduate	No	More supportive	Agree	Uncertain	Uncertain	Agree	Agree	Agree
32	547 sec.	Mobile Submit	Direct access	Female	19	Undergraduate	Yes	Neutral	Agree	Uncertain	Uncertain	Agree	Agree	Uncertain
33	445 sec.	Mobile Submit	Direct access	Female	21	Undergraduate	No	Neutral	Agree	Agree	Uncertain	Agree	Agree	Agree
34	106 sec.	Mobile Submit	Direct access	Female	21	Undergraduate	No	More supportive	Agree	Uncertain	Uncertain	Agree	Agree	Agree
35	269 sec.	Mobile Submit	Direct access	Male	20	Undergraduate	No	Neutral	Disagree	Disagree	Uncertain	Agree	Agree	Uncertain
36	148 sec.	Mobile Submit	Direct access	Female	21	Undergraduate	No	Neutral	Uncertain	Uncertain	Uncertain	Agree	Agree	Agree
37	127 sec.	Mobile Submit	Direct access	Female	21岁	Undergraduate	No	More supportive	Agree	Uncertain	Disagree	Agree	Agree	Agree
38	94 sec.	Mobile Submit	Direct access	Male	21	Undergraduate	Yes	Neutral	Agree	Agree	Agree	Uncertain	Uncertain	Uncertain
39	243 sec.	Mobile Submit	Direct access	Female	20	Undergraduate	Yes	Neutral	Disagree	Agree	Uncertain	Agree	Agree	Agree
40	259 sec.	Mobile Submit	Direct access	Female	21	Undergraduate	No	More supportive	Uncertain	Disagree	Uncertain	Agree	Agree	Agree
41	249 sec.	Mobile Submit	Direct access	Female	19	Undergraduate	No	Neutral	Disagree	Disagree	Agree	Agree	Agree	Uncertain
42	515 sec.	Mobile Submit	Direct access	Female	22	Undergraduate	No	Neutral	Uncertain	Uncertain	Uncertain	Uncertain	Uncertain	Uncertain
43	333 sec.	Mobile Submit	Direct access	Female	20	Undergraduate	No	More objectionable	Agree	Disagree	Uncertain	Uncertain	Disagree	Agree
44	195 sec.	WeChat	N/A	Female	21	Undergraduate	No	Neutral	Uncertain	Uncertain	Uncertain	Uncertain	Uncertain	Uncertain
45	296 sec.	WeChat	N/A	Female	20	Undergraduate	No	More supportive	Agree	Uncertain	Uncertain	Agree	Disagree	Uncertain
46	368 sec.	Mobile Submit	Direct access	Female	21	Undergraduate	No	More supportive	Agree	Uncertain	Agree	Agree	Agree	Agree
47	370 sec.	Mobile Submit	Direct access	Female	20	Undergraduate	Yes	More supportive	Agree	Uncertain	Uncertain	Agree	Uncertain	Uncertain
48	1198 sec.	Mobile Submit	Direct access	Female	22	Undergraduate	No	More supportive	Uncertain	Uncertain	Uncertain	Agree	Agree	Uncertain
49	241 sec.	Mobile Submit	Direct access	Female	21	Undergraduate	No	Neutral	Uncertain	Uncertain	Uncertain	Agree	Uncertain	Disagree
50	185 sec.	Mobile Submit	Direct access	Female	21	Undergraduate	No	Neutral	Agree	Agree	Agree	Agree	Uncertain	Uncertain
51	376 sec.	Mobile Submit	Direct access	Female	20	Undergraduate	Yes	Neutral	Agree	Disagree	Agree	Agree	Agree	Uncertain
52	345 sec.	Mobile Submit	Direct access	Male	23	Postgraduate	No	More supportive	Disagree	Disagree	Disagree	Agree	Agree	Agree
53	587 sec.	WeChat	N/A	Male	21	Undergraduate	Yes	More supportive	Agree	Disagree	Uncertain	Agree	Agree	Agree
54	605 sec.	Mobile Submit	Direct access	Male	22	Undergraduate	No	Neutral	Uncertain	Agree	Agree	Uncertain	Uncertain	Disagree
55	109 sec.	Mobile Submit	Direct access	Female	22	Postgraduate	No	Neutral	Uncertain	Uncertain	Uncertain	Agree	Uncertain	Uncertain
56	936 sec.	Mobile Submit	Direct access	Male	19	Undergraduate	No	More supportive	Disagree	Uncertain	Disagree	Agree	Agree	Agree
57	121 sec.	Mobile Submit	Direct access	Female	23	Undergraduate	No	More supportive	Disagree	Disagree	Disagree	Agree	Agree	Agree
58	638 sec.	Mobile Submit	Direct access	Female	22	Undergraduate	Yes	Neutral	Uncertain	Uncertain	Uncertain	Uncertain	Disagree	Disagree
59	1631 sec.	Mobile Submit	Direct access	Female	20	Undergraduate	No	More supportive	Agree	Uncertain	Uncertain	Agree	Agree	Agree
60	362 sec.	Mobile Submit	Direct access	Male	20	Undergraduate	No	More supportive	Uncertain	Agree	Uncertain	Agree	Agree	Uncertain
61	561 sec.	Mobile Submit	Direct access	Male	18	Undergraduate	No	More supportive	Disagree	Uncertain	Uncertain	Agree	Agree	Agree
62	250 sec.	Mobile Submit	Direct access	Female	19	Undergraduate	No	More objectionable	Agree	Agree	Uncertain	Disagree	Agree	Disagree
63	117 sec.	Mobile Submit	Direct access	Male	20	Undergraduate	No	More supportive	Agree	Disagree	Uncertain	Agree	Agree	Agree
64	308 sec.	Mobile Submit	Direct access	Female	20	Undergraduate	No	Neutral	Agree	Uncertain	Uncertain	Agree	Agree	Disagree
65	608 sec.	Mobile Submit	Direct access	Female	20	Undergraduate	Yes	Neutral	Disagree	Uncertain	Disagree	Agree	Uncertain	Agree
66	495 sec.	WeChat	N/A	Male	23	Undergraduate	No	Neutral	Agree	Agree	Agree	Agree	Agree	Uncertain
67	364 sec.	Mobile Submit	Direct access	Male	20	Undergraduate	Yes	Highly supportive	Agree	Agree	Agree	Agree	Agree	Agree
68	113 sec.	WeChat	N/A	Female	19	Undergraduate	No	More objectionable	Agree	Uncertain	Agree	Uncertain	Agree	Agree
69	203 sec.	Mobile Submit	Direct access	Female	22	Undergraduate	No	Neutral	Uncertain	Uncertain	Uncertain	Disagree	Uncertain	Uncertain
70	744 sec.	Mobile Submit	Direct access	Female	21	Undergraduate	No	Neutral	Uncertain	Disagree	Uncertain	Agree	Uncertain	Uncertain
71	385 sec.	Mobile Submit	Direct access	Female	18	Undergraduate	Yes	More supportive	Disagree	Disagree	Disagree	Agree	Agree	Uncertain
72	445 sec.	Mobile Submit	Direct access	Female	20	Undergraduate	No	Highly objectionable	Agree	Uncertain	Agree	Uncertain	Disagree	Disagree
73	256 sec.	WeChat	N/A	Female	20	Undergraduate	No	More objectionable	Agree	Uncertain	Agree	Uncertain	Agree	Uncertain
74	388 sec.	Mobile Submit	Direct access	Female	20	Undergraduate	No	Neutral	Disagree	Disagree	Uncertain	Agree	Agree	Uncertain
75	628 sec.	WeChat	N/A	Female	21	Undergraduate	No	More supportive	Uncertain	Uncertain	Uncertain	Agree	Agree	Agree
76	38 sec.	WeChat	N/A	Female	20	Undergraduate	Yes	Highly supportive	Agree	Agree	Agree	Agree	Agree	Agree
77	220 sec.	WeChat	N/A	Female	21	Undergraduate	Yes	Neutral	Disagree	Disagree	Disagree	Uncertain	Disagree	Disagree
78	250 sec.	Mobile Submit	Direct access	Female	22	Postgraduate	No	Neutral	Uncertain	Disagree	Uncertain	Agree	Agree	Uncertain
79	405 sec.	Mobile Submit	Direct access	Female	19	Undergraduate	Yes	Neutral	Agree	Uncertain	Agree	Uncertain	Agree	Uncertain
80	362 sec.	Mobile Submit	Direct access	Female	19	Undergraduate	No	Neutral	Uncertain	Uncertain	Uncertain	Uncertain	Disagree	Agree
81	416 sec.	WeChat	N/A	Male	24	Postgraduate	Yes	More supportive	Uncertain	Agree	Agree	Agree	Agree	Uncertain
82	619 sec.	Mobile Submit	Direct access	Female	18	Undergraduate	Yes	More supportive	Uncertain	Disagree	Disagree	Agree	Agree	Uncertain
83	427 sec.	Mobile Submit	Direct access	Male	17	Undergraduate	No	More supportive	Disagree	Disagree	Disagree	Uncertain	Uncertain	Agree
84	444 sec.	WeChat	N/A	Female	26	Undergraduate	Yes	Highly supportive	Agree	Agree	Agree	Agree	Agree	Agree
85	179 sec.	WeChat	N/A	Female	19	Undergraduate	Yes	Highly supportive	Agree	Disagree	Agree	Agree	Agree	Agree
86	538 sec.	Mobile Submit	Direct access	Female	22	Undergraduate	No	Neutral	Uncertain	Disagree	Uncertain	Agree	Uncertain	Uncertain
87	295 sec.	WeChat	N/A	Female	23	Postgraduate	Yes	More supportive	Agree	Agree	Agree	Agree	Agree	Agree
88	440 sec.	Mobile Submit	Direct access	Female	20	Undergraduate	No	Neutral	Agree	Disagree	Uncertain	Agree	Disagree	Uncertain
89	269 sec.	Mobile Submit	Direct access	Female	18	Undergraduate	Yes	More supportive	Agree	Uncertain	Agree	Agree	Agree	Uncertain
90	241 sec.	Mobile Submit	Direct access	Female	19	Undergraduate	No	Neutral	Uncertain	Disagree	Uncertain	Uncertain	Disagree	Uncertain
91	268 sec.	Mobile Submit	Direct access	Female	19	Undergraduate	No	Neutral	Agree	Agree	Disagree	Agree	Agree	Uncertain
92	245 sec.	Mobile Submit	Direct access	Female	20	Undergraduate	No	Neutral	Uncertain	Uncertain	Agree	Uncertain	Uncertain	Uncertain
93	427 sec.	WeChat	N/A	Female	28	Postgraduate	Yes	Highly supportive	Disagree	Disagree	Disagree	Agree	Agree	Agree
94	251 sec.	WeChat	N/A	Female	26	Undergraduate	Yes	Neutral	Uncertain	Uncertain	Uncertain	Uncertain	Uncertain	Disagree
95	489 sec.	WeChat	N/A	Female	19	Undergraduate	Yes	More supportive	Agree	Agree	Agree	Agree	Agree	Agree
96	245 sec.	WeChat	N/A	Male	28	Undergraduate	Yes	More supportive	Disagree	Disagree	Disagree	Agree	Agree	Agree
97	484 sec.	Mobile Submit	Direct access	Female	20	Undergraduate	No	More supportive	Uncertain	Disagree	Uncertain	Agree	Agree	Agree
98	532 sec.	Mobile Submit	Direct access	Female	20	Undergraduate	Yes	More supportive	Agree	Uncertain	Uncertain	Agree	Agree	Uncertain
99	442 sec.	WeChat	N/A	Male	24	Postgraduate	Yes	Neutral	Agree	Disagree	Agree	Agree	Agree	Agree
100	350 sec.	Mobile Submit	Direct access	Female	19	Undergraduate	No	Neutral	Agree	Agree	Agree	Uncertain	Disagree	Disagree
101	185 sec.	Mobile Submit	Direct access	Male	20	Undergraduate	No	More supportive	Agree	Agree	Agree	Uncertain	Disagree	Agree
102	581 sec.	Mobile Submit	Direct access	Female	19	Undergraduate	Yes	More objectionable	Agree	Disagree	Uncertain	Agree	Disagree	Agree
103	611 sec.	Mobile Submit	Direct access	Female	20	Undergraduate	No	Neutral	Uncertain	Uncertain	Uncertain	Uncertain	Uncertain	Uncertain
104	396 sec.	Mobile Submit	Direct access	Female	19	Undergraduate	No	More supportive	Disagree	Uncertain	Disagree	Agree	Agree	Uncertain
105	475 sec.	Mobile Submit	Direct access	Male	19	Undergraduate	No	Neutral	Uncertain	Uncertain	Uncertain	Agree	Agree	Agree
106	311 sec.	Mobile Submit	Direct access	Male	21	Undergraduate	No	More supportive	Uncertain	Uncertain	Agree	Agree	Agree	Agree
107	322 sec.	WeChat	N/A	Male	21	Undergraduate	Yes	Highly supportive	Agree	Uncertain	Uncertain	Uncertain	Agree	Uncertain
108	325 sec.	Mobile Submit	Direct access	Female	22	Undergraduate	No	More objectionable	Uncertain	Agree	Agree	Uncertain	Agree	Uncertain
109	358 sec.	Mobile Submit	Direct access	Female	20	Undergraduate	Yes	More objectionable	Uncertain	Agree	Uncertain	Uncertain	Uncertain	Uncertain
110	273 sec.	Mobile Submit	Direct access	Male	20	Undergraduate	No	More objectionable	Agree	Agree	Agree	Uncertain	Agree	Uncertain
111	191 sec.	Mobile Submit	Direct access	Female	19	Undergraduate	Yes	Neutral	Uncertain	Agree	Uncertain	Agree	Agree	Uncertain
112	518 sec.	Mobile Submit	Direct access	Male	21	Undergraduate	No	More objectionable	Uncertain	Agree	Agree	Uncertain	Uncertain	Uncertain
113	414 sec.	WeChat	N/A	Female	23	Undergraduate	No	Neutral	Uncertain	Disagree	Uncertain	Agree	Disagree	Uncertain
114	283 sec.	Mobile Submit	Direct access	Female	18	Undergraduate	No	Neutral	Uncertain	Uncertain	Uncertain	Uncertain	Uncertain	Uncertain
115	368 sec.	Mobile Submit	Direct access	Female	20	Undergraduate	No	Neutral	Agree	Agree	Agree	Agree	Agree	Disagree
116	123 sec.	Mobile Submit	Direct access	Female	19	Undergraduate	No	Neutral	Uncertain	Uncertain	Agree	Agree	Agree	Disagree
117	1404 sec.	WeChat	N/A	Male	25	Postgraduate	Yes	Neutral	Agree	Uncertain	Uncertain	Uncertain	Uncertain	Uncertain
118	812 sec.	WeChat	N/A	Female	18	Undergraduate	No	More supportive	Agree	Agree	Agree	Agree	Uncertain	Agree
119	424 sec.	WeChat	N/A	Male	23	Undergraduate	Yes	Neutral	Agree	Uncertain	Uncertain	Uncertain	Uncertain	Uncertain
120	176 sec.	Mobile Submit	Direct access	Female	21	Undergraduate	No	Neutral	Agree	Disagree	Agree	Uncertain	Agree	Uncertain
121	277 sec.	Mobile Submit	Direct access	Female	20	Undergraduate	Yes	More supportive	Uncertain	Agree	Uncertain	Agree	Agree	Agree
122	291 sec.	Mobile Submit	Direct access	Female	19	Undergraduate	No	Neutral	Uncertain	Uncertain	Agree	Agree	Disagree	Agree
123	435 sec.	Mobile Submit	Direct access	Female	18	Postgraduate	Yes	More supportive	Disagree	Uncertain	Disagree	Agree	Agree	Agree
124	404 sec.	Mobile Submit	Direct access	Female	21	Postgraduate	No	More supportive	Disagree	Disagree	Disagree	Uncertain	Agree	Agree
125	44 sec.	WeChat	N/A	Female	26	Undergraduate	Yes	More supportive	Agree	Uncertain	Uncertain	Uncertain	Uncertain	Uncertain
126	149 sec.	WeChat	N/A	Male	28	Postgraduate	Yes	Highly supportive	Disagree	Disagree	Disagree	Agree	Agree	Agree
127	55 sec.	WeChat	N/A	Male	19	Undergraduate	No	Neutral	Uncertain	Uncertain	Uncertain	Uncertain	Uncertain	Uncertain
128	46 sec.	WeChat	N/A	Male	23	Undergraduate	Yes	Highly objectionable	Disagree	Disagree	Uncertain	Disagree	Disagree	Disagree
129	222 sec.	WeChat	N/A	Male	29	Undergraduate	No	Neutral	Disagree	Agree	Agree	Disagree	Agree	Agree
130	134 sec.	WeChat	N/A	Female	26	Postgraduate	Yes	More supportive	Disagree	Agree	Agree	Agree	Agree	Agree
131	258 sec.	WeChat	N/A	Male	30	Postgraduate	Yes	More supportive	Agree	Agree	Agree	Agree	Agree	Uncertain
132	321 sec.	WeChat	N/A	Male	19	Postgraduate	Yes	Highly supportive	Agree	Agree	Agree	Agree	Agree	Agree
133	314 sec.	WeChat	N/A	Male	21	Undergraduate	Yes	Highly objectionable	Agree	Uncertain	Agree	Uncertain	Uncertain	Uncertain
134	89 sec.	WeChat	N/A	Male	34	Undergraduate	Yes	More supportive	Disagree	Disagree	Disagree	Uncertain	Uncertain	Disagree
135	343 sec.	WeChat	N/A	Male	27	Postgraduate	Yes	Neutral	Agree	Agree	Agree	Agree	Agree	Agree
136	191 sec.	WeChat	N/A	Female	23	Postgraduate	Yes	More objectionable	Agree	Agree	Agree	Agree	Agree	Agree
137	431 sec.	WeChat	N/A	Female	23	Postgraduate	Yes	Highly supportive	Agree	Disagree	Disagree	Agree	Agree	Agree
138	52 sec.	WeChat	N/A	Female	21	Undergraduate	Yes	Highly objectionable	Disagree	Disagree	Disagree	Disagree	Disagree	Agree
139	662 sec.	WeChat	N/A	Female	33	Postgraduate	Yes	More supportive	Disagree	Disagree	Disagree	Agree	Agree	Agree
140	674 sec.	WeChat	N/A	Female	23	Postgraduate	Yes	More supportive	Uncertain	Disagree	Disagree	Agree	Agree	Agree
141	401 sec.	Mobile Submit	Direct access	Female	19	Undergraduate	No	More supportive	Uncertain	Agree	Uncertain	Agree	Agree	Uncertain
142	507 sec.	Mobile Submit	Direct access	Female	21	Undergraduate	No	Neutral	Disagree	Disagree	Disagree	Agree	Uncertain	Uncertain
143	87 sec.	WeChat	N/A	Male	54	博士	Yes	Highly supportive	Disagree	Disagree	Disagree	Disagree	Agree	Agree
144	52 sec.	WeChat	N/A	Male	19	Undergraduate	No	Neutral	Uncertain	Disagree	Disagree	Uncertain	Uncertain	Uncertain
145	330 sec.	WeChat	N/A	Male	21	Undergraduate	Yes	More objectionable	Agree	Disagree	Agree	Agree	Agree	Agree
146	237 sec.	Mobile Submit	Direct access	Female	24	Postgraduate	No	Neutral	Uncertain	Disagree	Disagree	Agree	Agree	Uncertain
147	750 sec.	WeChat	N/A	Male	30	Postgraduate	Yes	More supportive	Agree	Disagree	Disagree	Agree	Agree	Agree
148	377 sec.	WeChat	N/A	Male	19	Undergraduate	Yes	More supportive	Agree	Agree	Agree	Agree	Agree	Agree
149	884 sec.	WeChat	N/A	Female	28	Postgraduate	Yes	Highly supportive	Agree	Agree	Agree	Agree	Agree	Agree
150	375 sec.	WeChat	N/A	Male	25	Postgraduate	Yes	More supportive	Agree	Uncertain	Uncertain	Disagree	Agree	Agree
151	37 sec.	WeChat	N/A	Male	26	Undergraduate	Yes	More objectionable	Uncertain	Disagree	Disagree	Agree	Agree	Agree
152	354 sec.	Mobile Submit	Direct access	Female	21	Undergraduate	No	Neutral	Uncertain	Disagree	Agree	Agree	Disagree	Agree
153	250 sec.	Mobile Submit	Direct access	Female	19	Undergraduate	No	Neutral	Agree	Uncertain	Agree	Agree	Uncertain	Disagree
154	593 sec.	WeChat	N/A	Male	24	Postgraduate	Yes	More supportive	Agree	Disagree	Uncertain	Agree	Agree	Agree
155	455 sec.	Mobile Submit	Direct access	Female	21	Undergraduate	No	Neutral	Disagree	Uncertain	Uncertain	Uncertain	Uncertain	Uncertain
156	1223 sec.	Mobile Submit	Direct access	Female	23	Undergraduate	Yes	More supportive	Disagree	Disagree	Disagree	Uncertain	Agree	Uncertain
157	844 sec.	WeChat	N/A	Male	23	Undergraduate	No	Neutral	Uncertain	Disagree	Agree	Agree	Agree	Uncertain
158	373 sec.	Mobile Submit	Direct access	Male	20	Undergraduate	No	Neutral	Agree	Uncertain	Uncertain	Agree	Agree	Uncertain
159	345 sec.	Mobile Submit	Direct access	Female	19	Undergraduate	No	More supportive	Agree	Disagree	Uncertain	Agree	Agree	Agree
160	365 sec.	WeChat	N/A	Female	23	Undergraduate	Yes	Neutral	Agree	Uncertain	Uncertain	Agree	Disagree	Disagree
161	540 sec.	Mobile Submit	Direct access	Female	19	Undergraduate	No	Neutral	Uncertain	Agree	Disagree	Agree	Agree	Agree
162	198 sec.	WeChat	N/A	Male	23	Undergraduate	No	Neutral	Agree	Uncertain	Agree	Agree	Agree	Uncertain
163	281 sec.	Mobile Submit	Direct access	Female	20	Undergraduate	No	Neutral	Agree	Agree	Uncertain	Agree	Uncertain	Uncertain
164	142 sec.	Mobile Submit	Direct access	Female	18	Undergraduate	No	Neutral	Uncertain	Uncertain	Agree	Agree	Agree	Uncertain
165	406 sec.	Mobile Submit	Direct access	Female	20	Undergraduate	No	Neutral	Uncertain	Uncertain	Uncertain	Uncertain	Uncertain	Agree
166	345 sec.	WeChat	N/A	Female	32	博士	Yes	Highly supportive	Agree	Disagree	Disagree	Agree	Disagree	Agree
167	796 sec.	Mobile Submit	Direct access	Female	21	Undergraduate	No	Neutral	Uncertain	Uncertain	Uncertain	Uncertain	Uncertain	Uncertain
168	352 sec.	WeChat	N/A	Female	21	Undergraduate	No	Neutral	Agree	Agree	Agree	Agree	Agree	Uncertain
169	229 sec.	Mobile Submit	Direct access	Female	21	Undergraduate	No	More supportive	Disagree	Uncertain	Uncertain	Agree	Uncertain	Agree
170	380 sec.	WeChat	N/A	Male	28	Undergraduate	No	Neutral	Disagree	Disagree	Disagree	Agree	Agree	Agree
171	199 sec.	Mobile Submit	Direct access	Female	21	Undergraduate	No	Neutral	Uncertain	Uncertain	Uncertain	Disagree	Disagree	Disagree
172	854 sec.	WeChat	N/A	Male	25	Postgraduate	Yes	More supportive	Agree	Disagree	Uncertain	Agree	Agree	Agree
173	638 sec.	WeChat	N/A	Female	27	Postgraduate	Yes	Highly supportive	Agree	Agree	Agree	Agree	Uncertain	Agree
174	382 sec.	Mobile Submit	Direct access	Female	20	Undergraduate	Yes	More supportive	Agree	Disagree	Uncertain	Agree	Agree	Uncertain
175	188 sec.	Mobile Submit	Direct access	Female	20	Undergraduate	No	Neutral	Agree	Disagree	Disagree	Agree	Agree	Uncertain
176	483 sec.	WeChat	N/A	Male	23	Undergraduate	Yes	More supportive	Uncertain	Uncertain	Agree	Agree	Uncertain	Uncertain
177	680 sec.	Mobile Submit	Direct access	Male	19	Undergraduate	No	Neutral	Agree	Agree	Uncertain	Agree	Agree	Uncertain
178	321 sec.	Mobile Submit	Direct access	Female	28	Postgraduate	No	Neutral	Uncertain	Uncertain	Uncertain	Agree	Agree	Agree
179	183 sec.	Mobile Submit	Direct access	Female	24	Postgraduate	No	Neutral	Disagree	Agree	Agree	Agree	Agree	Disagree
180	343 sec.	Mobile Submit	Direct access	Female	23	Undergraduate	No	More objectionable	Agree	Uncertain	Agree	Uncertain	Uncertain	Uncertain
181	176 sec.	WeChat	N/A	Female	20	Undergraduate	Yes	More supportive	Agree	Agree	Agree	Agree	Uncertain	Agree
182	366 sec.	WeChat	N/A	Female	23	Undergraduate	Yes	Highly objectionable	Agree	Disagree	Uncertain	Uncertain	Agree	Agree
183	312 sec.	WeChat	N/A	Female	20	Undergraduate	No	Neutral	Agree	Agree	Agree	Agree	Agree	Agree
184	80 sec.	WeChat	N/A	Female	23	Undergraduate	Yes	Neutral	Disagree	Disagree	Uncertain	Agree	Uncertain	Uncertain
185	199 sec.	WeChat	N/A	Female	23	Postgraduate	No	More objectionable	Agree	Agree	Agree	Agree	Agree	Disagree
186	198 sec.	WeChat	N/A	Male	22	Undergraduate	Yes	More supportive	Agree	Uncertain	Agree	Agree	Agree	Uncertain
187	243 sec.	WeChat	N/A	Male	21	博士	Yes	More supportive	Agree	Agree	Uncertain	Agree	Disagree	Agree
188	219 sec.	WeChat	N/A	Male	23	Postgraduate	Yes	More supportive	Disagree	Disagree	Disagree	Disagree	Disagree	Disagree
189	220 sec.	WeChat	N/A	Female	24	Postgraduate	Yes	Neutral	Agree	Agree	Agree	Agree	Agree	Agree
190	285 sec.	WeChat	N/A	Female	26	Postgraduate	Yes	More supportive	Uncertain	Uncertain	Uncertain	Agree	Agree	Agree
191	294 sec.	WeChat	N/A	Male	24	Postgraduate	Yes	Highly supportive	Agree	Agree	Agree	Agree	Agree	Agree
192	58 sec.	WeChat	N/A	Female	27	博士	Yes	More supportive	Agree	Agree	Uncertain	Agree	Agree	Agree
193	227 sec.	WeChat	N/A	Male	24	Postgraduate	Yes	More supportive	Uncertain	Disagree	Uncertain	Uncertain	Disagree	Uncertain
194	83 sec.	WeChat	N/A	Female	25	Postgraduate	Yes	Neutral	Agree	Agree	Agree	Agree	Agree	Agree
195	225 sec.	WeChat	N/A	Female	25	Postgraduate	Yes	Neutral	Uncertain	Disagree	Uncertain	Agree	Agree	Agree
196	231 sec.	WeChat	N/A	Female	27	博士	No	More objectionable	Agree	Agree	Agree	Agree	Agree	Disagree
197	280 sec.	WeChat	N/A	Female	23	Postgraduate	Yes	More supportive	Agree	Agree	Disagree	Agree	Agree	Agree
198	317 sec.	WeChat	N/A	Male	27	Postgraduate	Yes	More supportive	Agree	Agree	Agree	Uncertain	Agree	Agree
199	352 sec.	WeChat	N/A	Female	23	Postgraduate	Yes	More supportive	Agree	Uncertain	Agree	Agree	Agree	Agree
200	154 sec.	WeChat	N/A	Male	28	Postgraduate	No	More objectionable	Disagree	Uncertain	Uncertain	Disagree	Uncertain	Uncertain
201	323 sec.	WeChat	N/A	Male	31	博士	Yes	Neutral	Uncertain	Uncertain	Uncertain	Agree	Agree	Uncertain
202	266 sec.	WeChat	N/A	Female	26	Postgraduate	No	More supportive	Agree	Uncertain	Disagree	Agree	Agree	Agree
203	384 sec.	WeChat	N/A	Female	26	Postgraduate	Yes	More supportive	Disagree	Disagree	Disagree	Agree	Agree	Agree
204	403 sec.	WeChat	N/A	Male	23	Postgraduate	Yes	More supportive	Agree	Agree	Agree	Agree	Agree	Agree
205	329 sec.	WeChat	N/A	Female	26	Postgraduate	No	Neutral	Agree	Agree	Agree	Agree	Agree	Agree
206	421 sec.	WeChat	N/A	Female	25	Postgraduate	Yes	Neutral	Agree	Agree	Agree	Agree	Agree	Agree
207	367 sec.	WeChat	N/A	Female	29	Undergraduate	Yes	More supportive	Uncertain	Disagree	Uncertain	Agree	Agree	Uncertain
208	386 sec.	WeChat	N/A	Female	24	Postgraduate	Yes	Neutral	Agree	Agree	Disagree	Agree	Agree	Disagree
209	349 sec.	WeChat	N/A	Male	26	Postgraduate	Yes	More supportive	Uncertain	Uncertain	Agree	Agree	Agree	Disagree
210	463 sec.	WeChat	N/A	Female	28	Postgraduate	Yes	More supportive	Agree	Uncertain	Uncertain	Agree	Uncertain	Agree
211	407 sec.	WeChat	N/A	Female	25	Postgraduate	Yes	Neutral	Agree	Agree	Agree	Agree	Agree	Agree
212	483 sec.	WeChat	N/A	Female	25	Postgraduate	Yes	More supportive	Disagree	Disagree	Disagree	Agree	Agree	Agree
213	313 sec.	WeChat	N/A	Male	32	Postgraduate	Yes	Neutral	Uncertain	Disagree	Disagree	Uncertain	Agree	Agree
214	492 sec.	WeChat	N/A	Female	26	Postgraduate	Yes	Neutral	Agree	Agree	Agree	Agree	Agree	Agree
215	140 sec.	WeChat	N/A	Female	35	博士	No	Highly supportive	Agree	Disagree	Disagree	Agree	Agree	Agree
216	504 sec.	WeChat	N/A	Female	22	Postgraduate	Yes	More supportive	Agree	Agree	Disagree	Agree	Agree	Agree
217	480 sec.	WeChat	N/A	Male	25	Postgraduate	Yes	More supportive	Agree	Uncertain	Agree	Agree	Uncertain	Uncertain
218	597 sec.	WeChat	N/A	Male	28	Postgraduate	Yes	More supportive	Agree	Uncertain	Agree	Agree	Agree	Agree
219	299 sec.	WeChat	N/A	Male	27	Postgraduate	Yes	More supportive	Agree	Agree	Agree	Agree	Disagree	Disagree
220	320 sec.	WeChat	N/A	Female	24	Postgraduate	Yes	More supportive	Disagree	Disagree	Disagree	Agree	Agree	Agree
221	527 sec.	WeChat	N/A	Male	26	Postgraduate	Yes	More supportive	Agree	Uncertain	Agree	Agree	Agree	Agree
222	600 sec.	Mobile Submit	Direct access	Female	19	Undergraduate	No	More supportive	Agree	Disagree	Disagree	Agree	Uncertain	Uncertain
223	453 sec.	WeChat	N/A	Male	29	博士	Yes	Neutral	Agree	Disagree	Uncertain	Agree	Agree	Disagree
224	437 sec.	WeChat	N/A	Female	25	Postgraduate	Yes	Neutral	Uncertain	Uncertain	Uncertain	Agree	Agree	Uncertain
225	598 sec.	WeChat	N/A	Female	26	Postgraduate	No	More supportive	Uncertain	Disagree	Uncertain	Agree	Agree	Agree
226	942 sec.	WeChat	N/A	Female	26	Postgraduate	Yes	More supportive	Agree	Disagree	Agree	Uncertain	Disagree	Agree
227	139 sec.	Mobile Submit	Direct access	Female	22	Undergraduate	No	More objectionable	Agree	Agree	Agree	Agree	Agree	Uncertain
228	96 sec.	Mobile Submit	Direct access	Female	20	Undergraduate	No	More supportive	Uncertain	Disagree	Uncertain	Agree	Agree	Uncertain
229	448 sec.	WeChat	N/A	Female	25	Postgraduate	No	Neutral	Disagree	Disagree	Disagree	Agree	Agree	Agree
230	264 sec.	Mobile Submit	Direct access	Male	21	Undergraduate	No	Neutral	Agree	Uncertain	Uncertain	Agree	Agree	Uncertain
231	983 sec.	WeChat	N/A	Female	23	Postgraduate	Yes	More supportive	Agree	Agree	Agree	Agree	Uncertain	Uncertain
232	371 sec.	WeChat	N/A	Male	21	Undergraduate	Yes	More supportive	Agree	Agree	Agree	Agree	Agree	Agree
233	436 sec.	WeChat	N/A	Female	24	Postgraduate	Yes	Neutral	Agree	Uncertain	Agree	Uncertain	Agree	Uncertain
234	219 sec.	Mobile Submit	Direct access	Female	20	Undergraduate	Yes	Neutral	Uncertain	Disagree	Uncertain	Agree	Agree	Agree
235	392 sec.	Mobile Submit	Direct access	Male	19	Undergraduate	Yes	More supportive	Agree	Uncertain	Disagree	Agree	Agree	Agree
236	64 sec.	WeChat	N/A	Female	26	Postgraduate	No	Neutral	Agree	Agree	Uncertain	Agree	Agree	Uncertain
237	434 sec.	WeChat	N/A	Male	27	Postgraduate	Yes	More supportive	Disagree	Disagree	Uncertain	Agree	Agree	Uncertain
238	445 sec.	Mobile Submit	Direct access	Male	25	Postgraduate	Yes	More supportive	Agree	Uncertain	Disagree	Agree	Agree	Agree
239	364 sec.	WeChat	N/A	Male	32	博士	Yes	Highly objectionable	Agree	Disagree	Disagree	Agree	Disagree	Agree
240	171 sec.	WeChat	N/A	Male	30	Postgraduate	Yes	Neutral	Disagree	Agree	Uncertain	Agree	Agree	Uncertain
241	1011 sec.	WeChat	N/A	Male	27	Postgraduate	Yes	More supportive	Uncertain	Disagree	Uncertain	Agree	Agree	Uncertain
242	282 sec.	Mobile Submit	Direct access	Female	25	Postgraduate	No	Neutral	Agree	Agree	Agree	Agree	Agree	Agree
243	498 sec.	WeChat	N/A	Male	25	Postgraduate	Yes	More supportive	Agree	Agree	Agree	Uncertain	Uncertain	Agree
244	263 sec.	WeChat	N/A	Male	25	Postgraduate	Yes	Neutral	Uncertain	Disagree	Uncertain	Agree	Agree	Uncertain
245	456 sec.	WeChat	N/A	Female	23	Postgraduate	No	More supportive	Disagree	Disagree	Uncertain	Agree	Agree	Uncertain
246	256 sec.	Mobile Submit	Direct access	Male	24	Postgraduate	No	More objectionable	Agree	Uncertain	Agree	Uncertain	Uncertain	Uncertain
247	348 sec.	WeChat	N/A	Male	23	Postgraduate	Yes	More supportive	Agree	Agree	Agree	Agree	Agree	Agree
248	50 sec.	WeChat	N/A	Male	25	Postgraduate	Yes	Neutral	Uncertain	Disagree	Uncertain	Uncertain	Agree	Uncertain
249	157 sec.	WeChat	N/A	Female	35	Undergraduate	No	More supportive	Agree	Uncertain	Agree	Agree	Agree	Agree
250	283 sec.	WeChat	N/A	Male	20	Postgraduate	Yes	More supportive	Agree	Agree	Agree	Agree	Agree	Agree
251	327 sec.	WeChat	N/A	Male	30	Undergraduate	No	More supportive	Agree	Disagree	Agree	Agree	Agree	Agree
252	161 sec.	WeChat	N/A	Female	22	Postgraduate	Yes	Highly supportive	Agree	Agree	Agree	Agree	Agree	Agree
253	345 sec.	WeChat	N/A	Male	26	Postgraduate	Yes	More supportive	Agree	Disagree	Disagree	Agree	Agree	Agree
254	324 sec.	WeChat	N/A	Female	21	Undergraduate	Yes	Neutral	Agree	Uncertain	Uncertain	Agree	Uncertain	Agree
255	248 sec.	Mobile Submit	Direct access	Female	29	博士	No	More supportive	Disagree	Disagree	Disagree	Agree	Agree	Uncertain
256	443 sec.	Mobile Submit	Direct access	Female	21	Postgraduate	No	More supportive	Agree	Disagree	Uncertain	Agree	Agree	Agree
257	743 sec.	WeChat	N/A	Female	26	Postgraduate	Yes	Neutral	Agree	Disagree	Agree	Uncertain	Agree	Agree
258	737 sec.	Mobile Submit	Direct access	Female	24	Postgraduate	Yes	Neutral	Agree	Uncertain	Uncertain	Agree	Agree	Uncertain
259	628 sec.	Mobile Submit	Direct access	Female	26	博士	No	More supportive	Agree	Uncertain	Uncertain	Agree	Agree	Agree
260	89 sec.	Mobile Submit	Direct access	Female	19	Undergraduate	No	Neutral	Agree	Uncertain	Uncertain	Uncertain	Agree	Agree
261	196 sec.	Mobile Submit	Direct access	Female	19	Undergraduate	Yes	More supportive	Disagree	Disagree	Uncertain	Agree	Agree	Uncertain
262	72 sec.	WeChat	N/A	Male	24	博士	Yes	Highly supportive	Agree	Agree	Agree	Agree	Agree	Agree
263	619 sec.	WeChat	N/A	Female	26	博士	Yes	Neutral	Uncertain	Agree	Uncertain	Agree	Agree	Agree
264	674 sec.	WeChat	N/A	Male	23	博士	Yes	More supportive	Agree	Uncertain	Disagree	Uncertain	Uncertain	Agree
265	185 sec.	Mobile Submit	Direct access	Female	25	博士	No	Neutral	Agree	Uncertain	Uncertain	Agree	Agree	Agree
266	437 sec.	Mobile Submit	Direct access	Female	20	Undergraduate	No	Neutral	Uncertain	Agree	Agree	Uncertain	Agree	Agree
267	326 sec.	Mobile Submit	Direct access	Female	29	博士	Yes	Neutral	Uncertain	Disagree	Uncertain	Uncertain	Disagree	Disagree
268	384 sec.	Mobile Submit	Direct access	Female	30	博士	No	More supportive	Disagree	Uncertain	Disagree	Agree	Agree	Uncertain
269	227 sec.	Mobile Submit	Direct access	Male	27	Postgraduate	Yes	More supportive	Uncertain	Disagree	Uncertain	Agree	Agree	Agree
270	49 sec.	WeChat	N/A	Male	25	博士	Yes	More objectionable	Uncertain	Uncertain	Disagree	Agree	Agree	Agree
271	59 sec.	WeChat	N/A	Male	24	Undergraduate	Yes	Neutral	Uncertain	Agree	Agree	Agree	Agree	Agree
272	134 sec.	WeChat	N/A	Male	21	博士	Yes	More supportive	Disagree	Agree	Agree	Uncertain	Agree	Uncertain
273	339 sec.	WeChat	N/A	Female	35	博士	Yes	More supportive	Disagree	Disagree	Uncertain	Agree	Agree	Uncertain
274	122 sec.	WeChat	N/A	Male	27	博士	Yes	More supportive	Agree	Disagree	Uncertain	Disagree	Uncertain	Agree
275	307 sec.	WeChat	N/A	Female	32	博士	Yes	Highly supportive	Agree	Disagree	Disagree	Agree	Agree	Agree
276	329 sec.	WeChat	N/A	Male	29	博士	Yes	Highly supportive	Disagree	Disagree	Disagree	Agree	Agree	Agree
277	220 sec.	WeChat	N/A	Female	30	博士	Yes	Highly supportive	Disagree	Uncertain	Disagree	Agree	Agree	Agree
278	423 sec.	WeChat	N/A	Male	31	博士	Yes	Highly supportive	Agree	Disagree	Disagree	Agree	Agree	Agree
279	231 sec.	WeChat	N/A	Female	23	Undergraduate	Yes	Neutral	Agree	Agree	Uncertain	Uncertain	Uncertain	Agree
280	287 sec.	WeChat	N/A	Female	25	Postgraduate	Yes	More supportive	Agree	Uncertain	Agree	Agree	Agree	Agree
281	306 sec.	WeChat	N/A	Female	22	Undergraduate	Yes	Neutral	Uncertain	Disagree	Uncertain	Agree	Agree	Agree
282	1323 sec.	Mobile Submit	Direct access	Male	26	博士	Yes	More objectionable	Uncertain	Agree	Uncertain	Agree	Agree	Uncertain
283	358 sec.	Mobile Submit	Direct access	Male	25	博士	Yes	More supportive	Disagree	Agree	Agree	Agree	Agree	Agree
284	192 sec.	WeChat	N/A	Male	32	博士	Yes	More supportive	Uncertain	Disagree	Uncertain	Agree	Agree	Agree
285	348 sec.	Mobile Submit	Direct access	Female	29	博士	No	Neutral	Uncertain	Uncertain	Uncertain	Agree	Agree	Uncertain
286	40 sec.	Mobile Submit	Direct access	Female	19	Undergraduate	No	Neutral	Uncertain	Uncertain	Agree	Agree	Uncertain	Uncertain
287	74 sec.	Mobile Submit	Direct access	Female	20	Undergraduate	Yes	More supportive	Disagree	Uncertain	Uncertain	Agree	Uncertain	Agree
288	70 sec.	Mobile Submit	Direct access	Female	20	Undergraduate	No	Neutral	Disagree	Uncertain	Uncertain	Uncertain	Agree	Disagree
289	53 sec.	Mobile Submit	Direct access	Male	22	Undergraduate	Yes	Highly supportive	Agree	Disagree	Disagree	Disagree	Agree	Agree
290	142 sec.	Mobile Submit	Direct access	Male	22	Postgraduate	Yes	Neutral	Uncertain	Uncertain	Uncertain	Uncertain	Agree	Agree
291	88 sec.	Mobile Submit	Direct access	Male	20	Undergraduate	Yes	Neutral	Uncertain	Agree	Uncertain	Agree	Agree	Agree
292	77 sec.	Mobile Submit	Direct access	Female	21	Undergraduate	Yes	More supportive	Uncertain	Agree	Uncertain	Agree	Agree	Agree
293	35 sec.	Mobile Submit	Direct access	Female	18	Undergraduate	No	Neutral	Uncertain	Uncertain	Uncertain	Agree	Agree	Uncertain
294	108 sec.	Mobile Submit	Direct access	Female	19	Undergraduate	Yes	Neutral	Agree	Uncertain	Agree	Agree	Agree	Uncertain
295	32 sec.	Mobile Submit	Direct access	Male	18	Undergraduate	Yes	Neutral	Uncertain	Uncertain	Uncertain	Uncertain	Uncertain	Uncertain
296	114 sec.	WeChat	N/A	Male	18	Undergraduate	Yes	Neutral	Uncertain	Uncertain	Uncertain	Agree	Agree	Disagree
297	51 sec.	WeChat	N/A	Male	38	Undergraduate	No	More supportive	Agree	Disagree	Uncertain	Agree	Agree	Uncertain
298	59 sec.	Mobile Submit	Direct access	Female	18	Undergraduate	Yes	More supportive	Disagree	Uncertain	Uncertain	Agree	Agree	Agree
299	77 sec.	Mobile Submit	Direct access	Female	17	Undergraduate	Yes	Neutral	Uncertain	Uncertain	Agree	Uncertain	Agree	Uncertain
300	139 sec.	Mobile Submit	Direct access	Female	22	Postgraduate	Yes	Neutral	Uncertain	Uncertain	Uncertain	Agree	Agree	Uncertain
301	78 sec.	Mobile Submit	Direct access	Female	20	Undergraduate	Yes	较为反对	Uncertain	Agree	Agree	Uncertain	Agree	Agree
302	60 sec.	Mobile Submit	Direct access	Female	22	Postgraduate	Yes	Highly supportive	Disagree	Disagree	Disagree	Agree	Uncertain	Uncertain
303	82 sec.	Mobile Submit	Direct access	Female	20	Undergraduate	Yes	More supportive	Uncertain	Disagree	Disagree	Agree	Agree	Uncertain
304	73 sec.	Mobile Submit	Direct access	Male	25	Postgraduate	Yes	Neutral	Agree	Uncertain	Agree	Agree	Disagree	Agree
305	79 sec.	Mobile Submit	Direct access	Female	20	Undergraduate	Yes	Neutral	Uncertain	Uncertain	Uncertain	Agree	Agree	Agree
306	113 sec.	Mobile Submit	Direct access	Female	21	Undergraduate	Yes	Neutral	Uncertain	Uncertain	Agree	Disagree	Uncertain	Disagree
307	118 sec.	Mobile Submit	Direct access	Female	18	Undergraduate	Yes	More supportive	Disagree	Disagree	Uncertain	Uncertain	Agree	Uncertain
308	136 sec.	Mobile Submit	Direct access	Female	19	Undergraduate	Yes	More supportive	Agree	Disagree	Uncertain	Agree	Agree	Uncertain
309	148 sec.	Mobile Submit	Direct access	Female	22	Postgraduate	Yes	More supportive	Agree	Disagree	Uncertain	Agree	Agree	Agree
310	61 sec.	Mobile Submit	Direct access	Male	20	Undergraduate	Yes	More supportive	Agree	Uncertain	Disagree	Agree	Agree	Agree
311	50 sec.	Mobile Submit	Direct access	Female	19	Undergraduate	Yes	More supportive	Uncertain	Agree	Uncertain	Agree	Agree	Agree
312	52 sec.	Mobile Submit	Direct access	Female	20	Undergraduate	Yes	Neutral	Disagree	Disagree	Disagree	Agree	Disagree	Agree
313	88 sec.	Mobile Submit	Direct access	Female	19	Undergraduate	Yes	More supportive	Uncertain	Agree	Agree	Agree	Uncertain	Agree
314	88 sec.	Mobile Submit	Direct access	Female	19	Undergraduate	Yes	More supportive	Uncertain	Agree	Agree	Agree	Uncertain	Agree
315	84 sec.	Mobile Submit	Direct access	Female	20	Undergraduate	Yes	More supportive	Uncertain	Disagree	Disagree	Agree	Agree	Agree
316	93 sec.	Mobile Submit	Direct access	Female	20	Undergraduate	Yes	Neutral	Agree	Disagree	Uncertain	Agree	Agree	Agree
317	79 sec.	Mobile Submit	Direct access	Female	19	Undergraduate	Yes	More supportive	Agree	Uncertain	Uncertain	Agree	Agree	Uncertain
318	75 sec.	Mobile Submit	Direct access	Female	19	Undergraduate	Yes	Neutral	Disagree	Uncertain	Uncertain	Uncertain	Uncertain	Uncertain

## Sheet: Value Table
Serial number	time	Gender (Male 1 Female 2)	age	educational level(undergraduate1 graduate2)	major(0: not related to biology;1:related to biology)	explicit Attitude(acceptance of GM technology)	Calculation	6、Your attitude towards the view that ""GM crops and foods have unpredictable consequences"" is	7、Your attitude towards the view that "There are ecological hazards of GM crops" is	8、Your attitude towards the view that "GM foods are potentially harmful to human health" is	9、Your attitude towards the view that "GM crops and foods can help solve the problem of global hunger" is	10、Your attitude towards the view that "The development of GM can provide cheaper food for consumers" is	11、Your attitude towards the view that "GM crops and foods can provide people with higher nutrition and value" is	Cognitive level (total score)
1	168秒	1	19	1	0	3	38	0	0	0	0	0	0	0
2	224秒	2	19	1	0	4	38	1	1	1	1	1	1	6
3	269秒	1	19	1	0	4	38	1	1	1	0	0	0	3
4	306秒	2	22	1	1	4	38	-1	1	1	0	0	0	1
5	391秒	2	18	1	0	3	38	-1	-1	-1	0	1	0	-2
6	91秒	2	18	1	0	3	38	0	-1	0	1	1	0	1
7	407秒	2	20	1	0	2	38	-1	-1	-1	1	1	1	0
8	638秒	2	22	1	0	4	38	-1	0	0	1	1	1	2
9	302秒	2	20	1	0	3	38	0	0	-1	0	0	1	0
10	127秒	2	20	1	0	3	38	0	0	-1	1	0	-1	-1
11	276秒	2	19	1	0	4	38	1	1	1	1	0	0	4
12	185秒	2	18	1	0	3	38	0	0	0	1	-1	0	0
13	260秒	2	23	1	0	1	38	-1	-1	-1	0	0	0	-3
14	177秒	2	20	1	0	3	38	-1	0	-1	1	1	0	0
15	349秒	2	20	1	0	3	38	-1	1	-1	1	1	0	1
16	311秒	2	20	1	0	4	38	0	0	0	0	0	0	0
17	856秒	1	20;	1	1	3	38	0	0	0	1	1	1	3
18	185秒	1	19	1	0	3	38	-1	0	-1	1	1	1	1
19	274秒	2	18	1	0	5	38	1	1	1	1	1	0	5
20	365秒	2	18	1	0	3	38	-1	0	-1	1	1	0	0
21	250秒	1	23	1	0	3	38	-1	1	-1	1	1	0	1
22	400秒	1	20	1	0	3	38	-1	-1	1	1	1	1	2
24	506秒	1	20	1	1	3	38	-1	1	0	1	1	0	2
25	146秒	2	22	1	0	3	38	-1	0	0	0	0	-1	-2
26	100秒	1	20	1	0	3	38	1	0	0	0	1	0	2
27	209秒	2	18	1	0	3	38	0	0	0	1	1	0	2
29	688秒	2	21	1	0	4	38	1	1	0	1	1	1	5
30	207秒	2	19	1	1	3	38	0	0	0	0	0	0	0
31	72秒	2	20	1	0	2	38	0	0	0	0	0	0	0
32	312秒	2	20	1	0	4	38	1	0	1	1	1	1	5
33	868秒	2	20	1	0	4	38	-1	0	0	1	1	1	2
34	547秒	2	19	1	1	3	38	-1	0	0	1	1	0	1
36	445秒	2	21	1	0	3	38	-1	-1	0	1	1	1	1
37	106秒	2	21	1	0	4	38	-1	0	0	1	1	1	2
38	269秒	1	20	1	0	3	38	1	1	0	1	1	0	4
39	148秒	2	21	1	0	3	38	0	0	0	1	1	1	3
40	127秒	2	21岁	1	0	4	38	-1	0	1	1	1	1	3
41	94秒	1	21	1	1	3	38	-1	-1	-1	0	0	0	-3
42	243秒	2	20	1	1	3	38	1	-1	0	1	1	1	3
43	259秒	2	21	1	0	4	38	0	1	0	1	1	1	4
44	249秒	2	19	1	0	3	38	1	1	-1	1	1	0	3
45	515秒	2	22	1	0	3	38	0	0	0	0	0	0	0
46	333秒	2	20	1	0	2	38	-1	1	0	0	-1	1	0
48	195秒	2	21	1	0	3	38	0	0	0	0	0	0	0
49	296秒	2	20	1	0	4	38	-1	0	0	1	-1	0	-1
50	368秒	2	21	1	0	4	38	-1	0	-1	1	1	1	1
51	370秒	2	20	1	1	4	38	-1	0	0	1	0	0	0
52	1198秒	2	22	1	0	4	38	0	0	0	1	1	0	2
53	241秒	2	21	1	0	3	38	0	0	0	1	0	-1	0
54	185秒	2	21	1	0	3	38	-1	-1	-1	1	0	0	-2
55	376秒	2	20	1	1	3	38	-1	1	-1	1	1	0	1
56	345秒	1	23	2	0	4	38	1	1	1	1	1	1	6
57	587秒	1	21	1	1	4	38	-1	1	0	1	1	1	3
58	605秒	1	22	1	0	3	38	0	-1	-1	0	0	-1	-3
59	109秒	2	22	2	0	3	38	0	0	0	1	0	0	1
60	936秒	1	19	1	0	4	38	1	0	1	1	1	1	5
61	121秒	2	23	1	0	4	38	1	1	1	1	1	1	6
63	638秒	2	22	1	1	3	38	0	0	0	0	-1	-1	-2
64	1631秒	2	20	1	0	4	38	-1	0	0	1	1	1	2
65	362秒	1	20	1	0	4	38	0	-1	0	1	1	0	1
66	561秒	1	18	1	0	4	38	1	0	0	1	1	1	4
67	250秒	2	19	1	0	2	38	-1	-1	0	-1	1	-1	-3
68	117秒	1	20	1	0	4	38	-1	1	0	1	1	1	3
69	308秒	2	20	1	0	3	38	-1	0	0	1	1	-1	0
70	608秒	2	20	1	1	3	38	1	0	1	1	0	1	4
71	495秒	1	23	1	0	3	38	-1	-1	-1	1	1	0	-1
72	364秒	1	20	1	1	5	38	-1	-1	-1	1	1	1	0
73	113秒	2	19	1	0	2	38	-1	0	-1	0	1	1	0
74	203秒	2	22	1	0	3	38	0	0	0	-1	0	0	-1
76	744秒	2	21	1	0	3	38	0	1	0	1	0	0	2
77	385秒	2	18	1	1	4	38	1	1	1	1	1	0	5
78	445秒	2	20	1	0	1	38	-1	0	-1	0	-1	-1	-4
79	256秒	2	20	1	0	2	38	-1	0	-1	0	1	0	-1
80	388秒	2	20	1	0	3	38	1	1	0	1	1	0	4
81	628秒	2	21	1	0	4	38	0	0	0	1	1	1	3
83	38秒	2	20	1	1	5	38	-1	-1	-1	1	1	1	0
84	220秒	2	21	1	1	3	38	1	1	1	0	-1	-1	1
85	250秒	2	22	2	0	3	38	0	1	0	1	1	0	3
86	405秒	2	19	1	1	3	38	-1	0	-1	0	1	0	-1
87	362秒	2	19	1	0	3	38	0	0	0	0	-1	1	0
88	416秒	1	24	2	1	4	38	0	-1	-1	1	1	0	0
89	619秒	2	18	1	1	4	38	0	1	1	1	1	0	4
90	427秒	1	17	1	0	4	38	1	1	1	0	0	1	4
91	444秒	2	26	1	1	5	38	-1	-1	-1	1	1	1	0
92	179秒	2	19	1	1	5	38	-1	1	-1	1	1	1	2
93	538秒	2	22	1	0	3	38	0	1	0	1	0	0	2
95	295秒	2	23	2	1	4	38	-1	-1	-1	1	1	1	0
96	440秒	2	20	1	0	3	38	-1	1	0	1	-1	0	0
97	269秒	2	18	1	1	4	38	-1	0	-1	1	1	0	0
98	241秒	2	19	1	0	3	38	0	1	0	0	-1	0	0
99	268秒	2	19	1	0	3	38	-1	-1	1	1	1	0	1
100	245秒	2	20	1	0	3	38	0	0	-1	0	0	0	-1
101	427秒	2	28	2	1	5	38	1	1	1	1	1	1	6
103	251秒	2	26	1	1	3	38	0	0	0	0	0	-1	-1
104	489秒	2	19	1	1	4	38	-1	-1	-1	1	1	1	0
105	245秒	1	28	1	1	4	38	1	1	1	1	1	1	6
106	484秒	2	20	1	0	4	38	0	1	0	1	1	1	4
107	532秒	2	20	1	1	4	38	-1	0	0	1	1	0	1
108	442秒	1	24	2	1	3	38	-1	1	-1	1	1	1	2
110	350秒	2	19	1	0	3	38	-1	-1	-1	0	-1	-1	-5
111	185秒	1	20	1	0	4	38	-1	-1	-1	0	-1	1	-3
113	581秒	2	19	1	1	2	38	-1	1	0	1	-1	1	1
114	611秒	2	20	1	0	3	38	0	0	0	0	0	0	0
115	396秒	2	19	1	0	4	38	1	0	1	1	1	0	4
116	475秒	1	19	1	0	3	38	0	0	0	1	1	1	3
117	311秒	1	21	1	0	4	38	0	0	-1	1	1	1	2
118	322秒	1	21	1	1	5	38	-1	0	0	0	1	0	0
119	325秒	2	22	1	0	2	38	0	-1	-1	0	1	0	-1
120	358秒	2	20	1	1	2	38	0	-1	0	0	0	0	-1
121	273秒	1	20	1	0	2	38	-1	-1	-1	0	1	0	-2
122	191秒	2	19	1	1	3	38	0	-1	0	1	1	0	1
123	518秒	1	21	1	0	2	38	0	-1	-1	0	0	0	-2
124	414秒	2	23	1	0	3	38	0	1	0	1	-1	0	1
125	283秒	2	18	1	0	3	38	0	0	0	0	0	0	0
126	368秒	2	20	1	0	3	38	-1	-1	-1	1	1	-1	-2
127	123秒	2	19	1	0	3	38	0	0	-1	1	1	-1	0
128	1404秒	1	25	2	1	3	38	-1	0	0	0	0	0	-1
129	812秒	2	18	1	0	4	38	-1	-1	-1	1	0	1	-1
130	424秒	1	23	1	1	3	38	-1	0	0	0	0	0	-1
131	176秒	2	21	1	0	3	38	-1	1	-1	0	1	0	0
132	277秒	2	20	1	1	4	38	0	-1	0	1	1	1	2
133	291秒	2	19	1	0	3	38	0	0	-1	1	-1	1	0
134	435秒	2	18	2	1	4	38	1	0	1	1	1	1	5
135	404秒	2	21	2	0	4	38	1	1	1	0	1	1	5
136	44秒	2	26	1	1	4	38	-1	0	0	0	0	0	-1
137	149秒	1	28	2	1	5	38	1	1	1	1	1	1	6
138	55秒	1	19	1	0	3	38	0	0	0	0	0	0	0
140	46秒	1	23	1	1	1	38	1	1	0	-1	-1	-1	-1
141	222秒	1	29	1	0	3	38	1	-1	-1	-1	1	1	0
142	134秒	2	26	2	1	4	38	1	-1	-1	1	1	1	2
143	258秒	1	30	2	1	4	38	-1	-1	-1	1	1	0	-1
144	321秒	1	19	2	1	5	38	-1	-1	-1	1	1	1	0
145	314秒	1	21	1	1	1	38	-1	0	-1	0	0	0	-2
146	89秒	1	34	1	1	4	38	1	1	1	0	0	-1	2
147	343秒	1	27	2	1	3	38	-1	-1	-1	1	1	1	0
148	191秒	2	23	2	1	2	38	-1	-1	-1	1	1	1	0
149	431秒	2	23	2	1	5	38	-1	1	1	1	1	1	4
152	52秒	2	21	1	1	1	38	1	1	1	-1	-1	1	2
153	662秒	2	33	2	1	4	38	1	1	1	1	1	1	6
154	674秒	2	23	2	1	4	38	0	1	1	1	1	1	5
155	401秒	2	19	1	0	4	38	0	-1	0	1	1	0	1
156	507秒	2	21	1	0	3	38	1	1	1	1	0	0	4
157	87秒	1	54	3	1	5	38	1	1	1	-1	1	1	4
159	52秒	1	19	1	0	3	38	0	1	1	0	0	0	2
160	330秒	1	21	1	1	2	38	-1	1	-1	1	1	1	2
161	237秒	2	24	2	0	3	38	0	1	1	1	1	0	4
162	750秒	1	30	2	1	4	38	-1	1	1	1	1	1	4
163	377秒	1	19	1	1	4	38	-1	-1	-1	1	1	1	0
164	884秒	2	28	2	1	5	38	-1	-1	-1	1	1	1	0
165	375秒	1	25	2	1	4	38	-1	0	0	-1	1	1	0
166	37秒	1	26	1	1	2	38	0	1	1	1	1	1	5
168	354秒	2	21	1	0	3	38	0	1	-1	1	-1	1	1
169	250秒	2	19	1	0	3	38	-1	0	-1	1	0	-1	-2
170	593秒	1	24	2	1	4	38	-1	1	0	1	1	1	3
171	455秒	2	21	1	0	3	38	1	0	0	0	0	0	1
172	1223秒	2	23	1	1	4	38	1	1	1	0	1	0	4
173	844秒	1	23	1	0	3	38	0	1	-1	1	1	0	2
174	373秒	1	20	1	0	3	38	-1	0	0	1	1	0	1
175	345秒	2	19	1	0	4	38	-1	1	0	1	1	1	3
176	365秒	2	23	1	1	3	38	-1	0	0	1	-1	-1	-2
177	540秒	2	19	1	0	3	38	0	-1	1	1	1	1	3
178	198秒	1	23	1	0	3	38	-1	0	-1	1	1	0	0
179	281秒	2	20	1	0	3	38	-1	-1	0	1	0	0	-1
180	142秒	2	18	1	0	3	38	0	0	-1	1	1	0	1
181	406秒	2	20	1	0	3	38	0	0	0	0	0	1	1
182	345秒	2	32	3	1	5	38	-1	1	1	1	-1	1	2
183	796秒	2	21	1	0	3	38	0	0	0	0	0	0	0
184	352秒	2	21	1	0	3	38	-1	-1	-1	1	1	0	-1
185	229秒	2	21	1	0	4	38	1	0	0	1	0	1	3
186	380秒	1	28	1	0	3	38	1	1	1	1	1	1	6
188	199秒	2	21	1	0	3	38	0	0	0	-1	-1	-1	-3
189	854秒	1	25	2	1	4	38	-1	1	0	1	1	1	3
191	638秒	2	27	2	1	5	38	-1	-1	-1	1	0	1	-1
192	382秒	2	20	1	1	4	38	-1	1	0	1	1	0	2
193	188秒	2	20	1	0	3	38	-1	1	1	1	1	0	3
194	483秒	1	23	1	1	4	38	0	0	-1	1	0	0	0
195	680秒	1	19	1	0	3	38	-1	-1	0	1	1	0	0
196	321秒	2	28	2	0	3	38	0	0	0	1	1	1	3
197	183秒	2	24	2	0	3	38	1	-1	-1	1	1	-1	0
198	343秒	2	23	1	0	2	38	-1	0	-1	0	0	0	-2
199	176秒	2	20	1	1	4	38	-1	-1	-1	1	0	1	-1
200	366秒	2	23	1	1	1	38	-1	1	0	0	1	1	2
201	312秒	2	20	1	0	3	38	-1	-1	-1	1	1	1	0
203	80秒	2	23	1	1	3	38	1	1	0	1	0	0	3
204	199秒	2	23	2	0	2	38	-1	-1	-1	1	1	-1	-2
206	198秒	1	22	1	1	4	38	-1	0	-1	1	1	0	0
210	243秒	1	21	3	1	4	38	-1	-1	0	1	-1	1	-1
212	219秒	1	23	2	1	4	38	1	1	1	-1	-1	-1	0
213	220秒	2	24	2	1	3	38	-1	-1	-1	1	1	1	0
215	285秒	2	26	2	1	4	38	0	0	0	1	1	1	3
216	294秒	1	24	2	1	5	38	-1	-1	-1	1	1	1	0
218	58秒	2	27	3	1	4	38	-1	-1	0	1	1	1	1
219	227秒	1	24	2	1	4	38	0	1	0	0	-1	0	0
220	83秒	2	25	2	1	3	38	-1	-1	-1	1	1	1	0
221	225秒	2	25	2	1	3	38	0	1	0	1	1	1	4
222	231秒	2	27	3	0	2	38	-1	-1	-1	1	1	-1	-2
224	280秒	2	23	2	1	4	38	-1	-1	1	1	1	1	2
225	317秒	1	27	2	1	4	38	-1	-1	-1	0	1	1	-1
226	352秒	2	23	2	1	4	38	-1	0	-1	1	1	1	1
227	154秒	1	28	2	0	2	38	1	0	0	-1	0	0	0
228	323秒	1	31	3	1	3	38	0	0	0	1	1	0	2
229	266秒	2	26	2	0	4	38	-1	0	1	1	1	1	3
230	384秒	2	26	2	1	4	38	1	1	1	1	1	1	6
232	403秒	1	23	2	1	4	38	-1	-1	-1	1	1	1	0
233	329秒	2	26	2	0	3	38	-1	-1	-1	1	1	1	0
234	421秒	2	25	2	1	3	38	-1	-1	-1	1	1	1	0
236	367秒	2	29	1	1	4	38	0	1	0	1	1	0	3
237	386秒	2	24	2	1	3	38	-1	-1	1	1	1	-1	0
238	349秒	1	26	2	1	4	38	0	0	-1	1	1	-1	0
239	463秒	2	28	2	1	4	38	-1	0	0	1	0	1	1
240	407秒	2	25	2	1	3	38	-1	-1	-1	1	1	1	0
241	483秒	2	25	2	1	4	38	1	1	1	1	1	1	6
242	313秒	1	32	2	1	3	38	0	1	1	0	1	1	4
243	492秒	2	26	2	1	3	38	-1	-1	-1	1	1	1	0
244	140秒	2	35	3	0	5	38	-1	1	1	1	1	1	4
247	504秒	2	22	2	1	4	38	-1	-1	1	1	1	1	2
248	480秒	1	25	2	1	4	38	-1	0	-1	1	0	0	-1
249	597秒	1	28	2	1	4	38	-1	0	-1	1	1	1	1
250	299秒	1	27	2	1	4	38	-1	-1	-1	1	-1	-1	-4
252	320秒	2	24	2	1	4	38	1	1	1	1	1	1	6
253	527秒	1	26	2	1	4	38	-1	0	-1	1	1	1	1
254	600秒	2	19	1	0	4	38	-1	1	1	1	0	0	2
255	453秒	1	29	3	1	3	38	-1	1	0	1	1	-1	1
256	437秒	2	25	2	1	3	38	0	0	0	1	1	0	2
258	598秒	2	26	2	0	4	38	0	1	0	1	1	1	4
260	942秒	2	26	2	1	4	38	-1	1	-1	0	-1	1	-1
261	139秒	2	22	1	0	2	38	-1	-1	-1	1	1	0	-1
262	96秒	2	20	1	0	4	38	0	1	0	1	1	0	3
263	448秒	2	25	2	0	3	38	1	1	1	1	1	1	6
264	264秒	1	21	1	0	3	38	-1	0	0	1	1	0	1
265	983秒	2	23	2	1	4	38	-1	-1	-1	1	0	0	-2
266	371秒	1	21	1	1	4	38	-1	-1	-1	1	1	1	0
267	436秒	2	24	2	1	3	38	-1	0	-1	0	1	0	-1
268	219秒	2	20	1	1	3	38	0	1	0	1	1	1	4
269	392秒	1	19	1	1	4	38	-1	0	1	1	1	1	3
270	64秒	2	26	2	0	3	38	-1	-1	0	1	1	0	0
271	434秒	1	27	2	1	4	38	1	1	0	1	1	0	4
272	445秒	1	25	2	1	4	38	-1	0	1	1	1	1	3
273	364秒	1	32	3	1	1	38	-1	1	1	1	-1	1	2
274	171秒	1	30	2	1	3	38	1	-1	0	1	1	0	2
276	1011秒	1	27	2	1	4	38	0	1	0	1	1	0	3
277	282秒	2	25	2	0	3	38	-1	-1	-1	1	1	1	0
280	498秒	1	25	2	1	4	38	-1	-1	-1	0	0	1	-2
282	263秒	1	25	2	1	3	38	0	1	0	1	1	0	3
284	456秒	2	23	2	0	4	38	1	1	0	1	1	0	4
285	256秒	1	24	2	0	2	38	-1	0	-1	0	0	0	-2
286	348秒	1	23	2	1	4	38	-1	-1	-1	1	1	1	0
287	50秒	1	25	2	1	3	38	0	1	0	0	1	0	2
288	157秒	2	35	1	0	4	38	-1	0	-1	1	1	1	1
289	283秒	1	20	2	1	4	38	-1	-1	-1	1	1	1	0
291	327秒	1	30	1	0	4	38	-1	1	-1	1	1	1	2
292	161秒	2	22	2	1	5	38	-1	-1	-1	1	1	1	0
293	345秒	1	26	2	1	4	38	-1	1	1	1	1	1	4
297	324秒	2	21	1	1	3	38	-1	0	0	1	0	1	1
298	248秒	2	29	3	0	4	38	1	1	1	1	1	0	5
299	443秒	2	21	2	0	4	38	-1	1	0	1	1	1	3
300	743秒	2	26	2	1	3	38	-1	1	-1	0	1	1	1
301	737秒	2	24	2	1	3	38	-1	0	0	1	1	0	1
303	628秒	2	26	3	0	4	38	-1	0	0	1	1	1	2
304	89秒	2	19	1	0	3	38	-1	0	0	0	1	1	1
305	196秒	2	19	1	1	4	38	1	1	0	1	1	0	4
306	72秒	1	24	3	1	5	38	-1	-1	-1	1	1	1	0
307	619秒	2	26	3	1	3	38	0	-1	0	1	1	1	2
308	674秒	1	23	3	1	4	38	-1	0	1	0	0	1	1
309	185秒	2	25	3	0	3	38	-1	0	0	1	1	1	2
310	437秒	2	20	1	0	3	38	0	-1	-1	0	1	1	0
311	326秒	2	29	3	1	3	38	0	1	0	0	-1	-1	-1
312	384秒	2	30	3	0	4	38	1	0	1	1	1	0	4
313	227秒	1	27	2	1	4	38	0	1	0	1	1	1	4
314	49秒	1	25	3	1	2	38	0	0	1	1	1	1	4
315	59秒	1	24	1	1	3	38	0	-1	-1	1	1	1	1
316	134秒	1	21	3	1	4	38	1	-1	-1	0	1	0	0
317	339秒	2	35	3	1	4	38	1	1	0	1	1	0	4
318	122秒	1	27	3	1	4	38	-1	1	0	-1	0	1	0
319	307秒	2	32	3	1	5	38	-1	1	1	1	1	1	4
320	329秒	1	29	3	1	5	38	1	1	1	1	1	1	6
321	220秒	2	30	3	1	5	38	1	0	1	1	1	1	5
322	423秒	1	31	3	1	5	38	-1	1	1	1	1	1	4
323	231秒	2	23	1	1	3	38	-1	-1	0	0	0	1	-1
324	287秒	2	25	2	1	4	38	-1	0	-1	1	1	1	1
325	306秒	2	22	1	1	3	38	0	1	0	1	1	1	4
326	1323秒	1	26	3	1	2	38	0	-1	0	1	1	0	1
328	358秒	1	25	3	1	4	38	1	-1	-1	1	1	1	2
329	192秒	1	32	3	1	4	38	0	1	0	1	1	1	4
331	348秒	2	29	3	0	3	38	0	0	0	1	1	0	2
1	40秒	2	19	1	0	3	38	0	0	-1	1	0	0	0
2	74秒	2	20	1	1	4	38	1	0	0	1	0	1	3
3	70秒	2	20	1	0	3	38	1	0	0	0	1	-1	1
4	53秒	1	22	1	1	5	38	-1	1	1	-1	1	1	2
5	142秒	1	22	2	1	3	28	0	0	0	0	1	1	2
6	88秒	1	20	1	1	3	38	0	-1	0	1	1	1	2
7	77秒	2	21	1	1	4	38	0	-1	0	1	1	1	2
8	35秒	2	18	1	0	3	38	0	0	0	1	1	0	2
9	108秒	2	19	1	1	3	38	-1	0	-1	1	1	0	0
10	32秒	1	18	1	1	3	38	0	0	0	0	0	0	0
11	114秒	1	18	1	1	3	38	0	0	0	1	1	-1	1
12	51秒	1	38	1	0	4	38	-1	1	0	1	1	0	2
13	59秒	2	18	1	1	4	38	1	0	0	1	1	1	4
14	77秒	2	17	1	1	3	14	0	0	-1	0	1	0	0
15	139秒	2	22	2	1	3	38	0	0	0	1	1	0	2
16	78秒	2	20	1	1	2	38	0	-1	-1	0	1	1	0
17	60秒	2	22	2	1	5	14	1	1	1	1	0	0	4
18	82秒	2	20	1	1	4	38	0	1	1	1	1	0	4
19	73秒	1	25	2	1	3	38	-1	0	-1	1	-1	1	-1
20	79秒	2	20	1	1	3	38	0	0	0	1	1	1	3
21	113秒	2	21	1	1	3	38	0	0	-1	-1	0	-1	-3
22	118秒	2	18	1	1	4	38	1	1	0	0	1	0	3
23	136秒	2	19	1	1	4	38	-1	1	0	1	1	0	2
24	148秒	2	22	2	1	4	38	-1	1	0	1	1	1	3
25	61秒	1	20	1	1	4	38	-1	0	1	1	1	1	3
26	50秒	2	19	1	1	4	38	0	-1	0	1	1	1	2
27	52秒	2	20	1	1	3	38	1	1	1	1	-1	1	4
28	88秒	2	19	1	1	4	38	0	-1	-1	1	0	1	0
28	88秒	2	19	1	1	4	38	0	-1	-1	1	0	1	0
29	84秒	2	20	1	1	4	38	0	1	1	1	1	1	5
30	93秒	2	20	1	1	3	38	-1	1	0	1	1	1	3
31	79秒	2	19	1	1	4	38	-1	0	0	1	1	0	1
32	75秒	2	19	1	1	3	38	1	0	0	0	0	0	1
