# Supplementary material for: The implicit and explicit attitudes of Chinese university students towards genetic modification
Source: Front Psychol. 2022 Nov 23;13:1014395. doi: 10.3389/fpsyg.2022.1014395 (PMC9728140; doi:10.3389/fpsyg.2022.1014395)
Supplement: Supplementary file 2 [file Table_2.XLSX]

## Sheet: Original data
ExperimentName	Subject	Session	Clock.Information	Display.RefreshRate	ExperimentVersion	Group	RandomSeed	RuntimeVersion	SessionDate	SessionStartDateTimeUtc	SessionTime	StudioVersion	Block	Procedure[Block]	Running[Block]	WordList	WordList.Cycle	WordList.Sample	Trial	answer	answer2	nameList	nameList1	nameList2	nameList3	negativeList	negativeList1	negativeList2	negativeList3	positiveList	positiveList1	positiveList2	positiveList3	practiceList1	practiceList1.Cycle	practiceList1.Sample	practiceList2	practiceList2.Cycle	practiceList2.Sample	Procedure[Trial]	Running[Trial]	stim	stim1.ACC	stim1.CRESP	stim1.DurationError	stim1.OnsetDelay	stim1.OnsetTime	stim1.OnsetToOnsetTime	stim1.RESP
大创sc-iat	1	1	<?xml version="1.0"?>\n<Clock xmlns:dt="urn:schemas-microsoft-com:datatypes"><Description dt:dt="string">E-Prime Primary Realtime Clock</Description><StartTime><Timestamp dt:dt="int">0</Timestamp><DateUtc dt:dt="string">2021-10-21T10:44:38Z</DateUtc></StartTime><FrequencyChanges><FrequencyChange><Frequency dt:dt="r8">10000000</Frequency><Timestamp dt:dt="r8">17122103608621</Timestamp><Current dt:…	59.959	1.0.0.17	1	-1928908105	2.0.10.182	10-21-2021	2021-10-21 10:44:39	18:44:39	2.0.10.92	1	affpro	WordList	1	1	1	1	f	NULL	2	NULL	NULL	NULL	NULL	NULL	NULL	NULL	NULL	NULL	NULL	NULL	1	1	1	NULL	NULL	NULL	pra1	practiceList1	抗虫害棉花	1	f	-999999	-2	41701	0	f
大创sc-iat	1	1	<?xml version="1.0"?>\n<Clock xmlns:dt="urn:schemas-microsoft-com:datatypes"><Description dt:dt="string">E-Prime Primary Realtime Clock</Description><StartTime><Timestamp dt:dt="int">0</Timestamp><DateUtc dt:dt="string">2021-10-21T10:44:38Z</DateUtc></StartTime><FrequencyChanges><FrequencyChange><Frequency dt:dt="r8">10000000</Frequency><Timestamp dt:dt="r8">17122103608621</Timestamp><Current dt:…	59.959	1.0.0.17	1	-1928908105	2.0.10.182	10-21-2021	2021-10-21 10:44:39	18:44:39	2.0.10.92	1	affpro	WordList	1	1	1	2	j	NULL	NULL	NULL	NULL	NULL	3	NULL	NULL	NULL	NULL	NULL	NULL	NULL	3	1	2	NULL	NULL	NULL	pra1	practiceList1	非天然的	1	j	-999999	3	43763	0	j
大创sc-iat	1	1	<?xml version="1.0"?>\n<Clock xmlns:dt="urn:schemas-microsoft-com:datatypes"><Description dt:dt="string">E-Prime Primary Realtime Clock</Description><StartTime><Timestamp dt:dt="int">0</Timestamp><DateUtc dt:dt="string">2021-10-21T10:44:38Z</DateUtc></StartTime><FrequencyChanges><FrequencyChange><Frequency dt:dt="r8">10000000</Frequency><Timestamp dt:dt="r8">17122103608621</Timestamp><Current dt:…	59.959	1.0.0.17	1	-1928908105	2.0.10.182	10-21-2021	2021-10-21 10:44:39	18:44:39	2.0.10.92	1	affpro	WordList	1	1	1	3	j	NULL	NULL	NULL	NULL	NULL	4	NULL	NULL	NULL	NULL	NULL	NULL	NULL	3	1	3	NULL	NULL	NULL	pra1	practiceList1	有争议的	1	j	-999999	-1	46530	0	j
大创sc-iat	1	1	<?xml version="1.0"?>\n<Clock xmlns:dt="urn:schemas-microsoft-com:datatypes"><Description dt:dt="string">E-Prime Primary Realtime Clock</Description><StartTime><Timestamp dt:dt="int">0</Timestamp><DateUtc dt:dt="string">2021-10-21T10:44:38Z</DateUtc></StartTime><FrequencyChanges><FrequencyChange><Frequency dt:dt="r8">10000000</Frequency><Timestamp dt:dt="r8">17122103608621</Timestamp><Current dt:…	59.959	1.0.0.17	1	-1928908105	2.0.10.182	10-21-2021	2021-10-21 10:44:39	18:44:39	2.0.10.92	1	affpro	WordList	1	1	1	4	f	NULL	NULL	NULL	NULL	NULL	NULL	NULL	NULL	NULL	3	NULL	NULL	NULL	2	1	4	NULL	NULL	NULL	pra1	practiceList1	高科技的	1	f	-999999	-1	48316	0	f
大创sc-iat	1	1	<?xml version="1.0"?>\n<Clock xmlns:dt="urn:schemas-microsoft-com:datatypes"><Description dt:dt="string">E-Prime Primary Realtime Clock</Description><StartTime><Timestamp dt:dt="int">0</Timestamp><DateUtc dt:dt="string">2021-10-21T10:44:38Z</DateUtc></StartTime><FrequencyChanges><FrequencyChange><Frequency dt:dt="r8">10000000</Frequency><Timestamp dt:dt="r8">17122103608621</Timestamp><Current dt:…	59.959	1.0.0.17	1	-1928908105	2.0.10.182	10-21-2021	2021-10-21 10:44:39	18:44:39	2.0.10.92	1	affpro	WordList	1	1	1	5	j	NULL	NULL	NULL	NULL	NULL	2	NULL	NULL	NULL	NULL	NULL	NULL	NULL	3	2	5	NULL	NULL	NULL	pra1	practiceList1	高风险的	1	j	-999999	-5	49842	0	j
大创sc-iat	1	1	<?xml version="1.0"?>\n<Clock xmlns:dt="urn:schemas-microsoft-com:datatypes"><Description dt:dt="string">E-Prime Primary Realtime Clock</Description><StartTime><Timestamp dt:dt="int">0</Timestamp><DateUtc dt:dt="string">2021-10-21T10:44:38Z</DateUtc></StartTime><FrequencyChanges><FrequencyChange><Frequency dt:dt="r8">10000000</Frequency><Timestamp dt:dt="r8">17122103608621</Timestamp><Current dt:…	59.959	1.0.0.17	1	-1928908105	2.0.10.182	10-21-2021	2021-10-21 10:44:39	18:44:39	2.0.10.92	1	affpro	WordList	1	1	1	6	f	NULL	1	NULL	NULL	NULL	NULL	NULL	NULL	NULL	NULL	NULL	NULL	NULL	1	2	6	NULL	NULL	NULL	pra1	practiceList1	转基因食物	1	f	-999999	-1	51318	0	f
大创sc-iat	1	1	<?xml version="1.0"?>\n<Clock xmlns:dt="urn:schemas-microsoft-com:datatypes"><Description dt:dt="string">E-Prime Primary Realtime Clock</Description><StartTime><Timestamp dt:dt="int">0</Timestamp><DateUtc dt:dt="string">2021-10-21T10:44:38Z</DateUtc></StartTime><FrequencyChanges><FrequencyChange><Frequency dt:dt="r8">10000000</Frequency><Timestamp dt:dt="r8">17122103608621</Timestamp><Current dt:…	59.959	1.0.0.17	1	-1928908105	2.0.10.182	10-21-2021	2021-10-21 10:44:39	18:44:39	2.0.10.92	1	affpro	WordList	1	1	1	7	f	NULL	NULL	NULL	NULL	NULL	NULL	NULL	NULL	NULL	1	NULL	NULL	NULL	2	2	7	NULL	NULL	NULL	pra1	practiceList1	科学的	1	f	-999999	6	53113	0	f
大创sc-iat	1	1	<?xml version="1.0"?>\n<Clock xmlns:dt="urn:schemas-microsoft-com:datatypes"><Description dt:dt="string">E-Prime Primary Realtime Clock</Description><StartTime><Timestamp dt:dt="int">0</Timestamp><DateUtc dt:dt="string">2021-10-21T10:44:38Z</DateUtc></StartTime><FrequencyChanges><FrequencyChange><Frequency dt:dt="r8">10000000</Frequency><Timestamp dt:dt="r8">17122103608621</Timestamp><Current dt:…	59.959	1.0.0.17	1	-1928908105	2.0.10.182	10-21-2021	2021-10-21 10:44:39	18:44:39	2.0.10.92	1	affpro	WordList	1	1	1	8	j	NULL	NULL	NULL	NULL	NULL	1	NULL	NULL	NULL	NULL	NULL	NULL	NULL	3	2	8	NULL	NULL	NULL	pra1	practiceList1	不成熟的	1	j	-999999	0	54651	0	j
大创sc-iat	1	1	<?xml version="1.0"?>\n<Clock xmlns:dt="urn:schemas-microsoft-com:datatypes"><Description dt:dt="string">E-Prime Primary Realtime Clock</Description><StartTime><Timestamp dt:dt="int">0</Timestamp><DateUtc dt:dt="string">2021-10-21T10:44:38Z</DateUtc></StartTime><FrequencyChanges><FrequencyChange><Frequency dt:dt="r8">10000000</Frequency><Timestamp dt:dt="r8">17122103608621</Timestamp><Current dt:…	59.959	1.0.0.17	1	-1928908105	2.0.10.182	10-21-2021	2021-10-21 10:44:39	18:44:39	2.0.10.92	1	affpro	WordList	1	1	1	9	f	NULL	3	NULL	NULL	NULL	NULL	NULL	NULL	NULL	NULL	NULL	NULL	NULL	1	3	9	NULL	NULL	NULL	pra1	practiceList1	转基因大豆	1	f	-999999	2	56054	0	f
大创sc-iat	1	1	<?xml version="1.0"?>\n<Clock xmlns:dt="urn:schemas-microsoft-com:datatypes"><Description dt:dt="string">E-Prime Primary Realtime Clock</Description><StartTime><Timestamp dt:dt="int">0</Timestamp><DateUtc dt:dt="string">2021-10-21T10:44:38Z</DateUtc></StartTime><FrequencyChanges><FrequencyChange><Frequency dt:dt="r8">10000000</Frequency><Timestamp dt:dt="r8">17122103608621</Timestamp><Current dt:…	59.959	1.0.0.17	1	-1928908105	2.0.10.182	10-21-2021	2021-10-21 10:44:39	18:44:39	2.0.10.92	1	affpro	WordList	1	1	1	10	j	NULL	NULL	NULL	NULL	NULL	3	NULL	NULL	NULL	NULL	NULL	NULL	NULL	3	3	10	NULL	NULL	NULL	pra1	practiceList1	非天然的	1	j	-999999	4	57413	0	j
大创sc-iat	1	1	<?xml version="1.0"?>\n<Clock xmlns:dt="urn:schemas-microsoft-com:datatypes"><Description dt:dt="string">E-Prime Primary Realtime Clock</Description><StartTime><Timestamp dt:dt="int">0</Timestamp><DateUtc dt:dt="string">2021-10-21T10:44:38Z</DateUtc></StartTime><FrequencyChanges><FrequencyChange><Frequency dt:dt="r8">10000000</Frequency><Timestamp dt:dt="r8">17122103608621</Timestamp><Current dt:…	59.959	1.0.0.17	1	-1928908105	2.0.10.182	10-21-2021	2021-10-21 10:44:39	18:44:39	2.0.10.92	1	affpro	WordList	1	1	1	11	j	NULL	NULL	NULL	NULL	NULL	4	NULL	NULL	NULL	NULL	NULL	NULL	NULL	3	3	11	NULL	NULL	NULL	pra1	practiceList1	有争议的	1	j	-999999	-5	58912	0	j
大创sc-iat	1	1	<?xml version="1.0"?>\n<Clock xmlns:dt="urn:schemas-microsoft-com:datatypes"><Description dt:dt="string">E-Prime Primary Realtime Clock</Description><StartTime><Timestamp dt:dt="int">0</Timestamp><DateUtc dt:dt="string">2021-10-21T10:44:38Z</DateUtc></StartTime><FrequencyChanges><FrequencyChange><Frequency dt:dt="r8">10000000</Frequency><Timestamp dt:dt="r8">17122103608621</Timestamp><Current dt:…	59.959	1.0.0.17	1	-1928908105	2.0.10.182	10-21-2021	2021-10-21 10:44:39	18:44:39	2.0.10.92	1	affpro	WordList	1	1	1	12	f	NULL	NULL	NULL	NULL	NULL	NULL	NULL	NULL	NULL	2	NULL	NULL	NULL	2	3	12	NULL	NULL	NULL	pra1	practiceList1	高产的	1	f	-999999	6	60368	0	f
大创sc-iat	1	1	<?xml version="1.0"?>\n<Clock xmlns:dt="urn:schemas-microsoft-com:datatypes"><Description dt:dt="string">E-Prime Primary Realtime Clock</Description><StartTime><Timestamp dt:dt="int">0</Timestamp><DateUtc dt:dt="string">2021-10-21T10:44:38Z</DateUtc></StartTime><FrequencyChanges><FrequencyChange><Frequency dt:dt="r8">10000000</Frequency><Timestamp dt:dt="r8">17122103608621</Timestamp><Current dt:…	59.959	1.0.0.17	1	-1928908105	2.0.10.182	10-21-2021	2021-10-21 10:44:39	18:44:39	2.0.10.92	1	affpro	WordList	1	1	1	13	j	NULL	NULL	NULL	NULL	NULL	1	NULL	NULL	NULL	NULL	NULL	NULL	NULL	3	4	13	NULL	NULL	NULL	pra1	practiceList1	不成熟的	1	j	-999999	-7	62412	0	j
大创sc-iat	1	1	<?xml version="1.0"?>\n<Clock xmlns:dt="urn:schemas-microsoft-com:datatypes"><Description dt:dt="string">E-Prime Primary Realtime Clock</Description><StartTime><Timestamp dt:dt="int">0</Timestamp><DateUtc dt:dt="string">2021-10-21T10:44:38Z</DateUtc></StartTime><FrequencyChanges><FrequencyChange><Frequency dt:dt="r8">10000000</Frequency><Timestamp dt:dt="r8">17122103608621</Timestamp><Current dt:…	59.959	1.0.0.17	1	-1928908105	2.0.10.182	10-21-2021	2021-10-21 10:44:39	18:44:39	2.0.10.92	1	affpro	WordList	1	1	1	14	f	NULL	NULL	NULL	NULL	NULL	NULL	NULL	NULL	NULL	4	NULL	NULL	NULL	2	4	14	NULL	NULL	NULL	pra1	practiceList1	创新的	1	f	-999999	-7	63731	0	f
大创sc-iat	1	1	<?xml version="1.0"?>\n<Clock xmlns:dt="urn:schemas-microsoft-com:datatypes"><Description dt:dt="string">E-Prime Primary Realtime Clock</Description><StartTime><Timestamp dt:dt="int">0</Timestamp><DateUtc dt:dt="string">2021-10-21T10:44:38Z</DateUtc></StartTime><FrequencyChanges><FrequencyChange><Frequency dt:dt="r8">10000000</Frequency><Timestamp dt:dt="r8">17122103608621</Timestamp><Current dt:…	59.959	1.0.0.17	1	-1928908105	2.0.10.182	10-21-2021	2021-10-21 10:44:39	18:44:39	2.0.10.92	1	affpro	WordList	1	1	1	15	f	NULL	4	NULL	NULL	NULL	NULL	NULL	NULL	NULL	NULL	NULL	NULL	NULL	1	4	15	NULL	NULL	NULL	pra1	practiceList1	动物转基因	1	f	-999999	-2	65073	0	f
大创sc-iat	1	1	<?xml version="1.0"?>\n<Clock xmlns:dt="urn:schemas-microsoft-com:datatypes"><Description dt:dt="string">E-Prime Primary Realtime Clock</Description><StartTime><Timestamp dt:dt="int">0</Timestamp><DateUtc dt:dt="string">2021-10-21T10:44:38Z</DateUtc></StartTime><FrequencyChanges><FrequencyChange><Frequency dt:dt="r8">10000000</Frequency><Timestamp dt:dt="r8">17122103608621</Timestamp><Current dt:…	59.959	1.0.0.17	1	-1928908105	2.0.10.182	10-21-2021	2021-10-21 10:44:39	18:44:39	2.0.10.92	1	affpro	WordList	1	1	1	16	j	NULL	NULL	NULL	NULL	NULL	2	NULL	NULL	NULL	NULL	NULL	NULL	NULL	3	4	16	NULL	NULL	NULL	pra1	practiceList1	高风险的	1	j	-999999	-5	66731	0	j
大创sc-iat	1	1	<?xml version="1.0"?>\n<Clock xmlns:dt="urn:schemas-microsoft-com:datatypes"><Description dt:dt="string">E-Prime Primary Realtime Clock</Description><StartTime><Timestamp dt:dt="int">0</Timestamp><DateUtc dt:dt="string">2021-10-21T10:44:38Z</DateUtc></StartTime><FrequencyChanges><FrequencyChange><Frequency dt:dt="r8">10000000</Frequency><Timestamp dt:dt="r8">17122103608621</Timestamp><Current dt:…	59.959	1.0.0.17	1	-1928908105	2.0.10.182	10-21-2021	2021-10-21 10:44:39	18:44:39	2.0.10.92	1	affpro	WordList	1	1	1	17	f	NULL	1	NULL	NULL	NULL	NULL	NULL	NULL	NULL	NULL	NULL	NULL	NULL	1	5	17	NULL	NULL	NULL	pra1	practiceList1	转基因食物	1	f	-999999	5	68178	0	f
大创sc-iat	1	1	<?xml version="1.0"?>\n<Clock xmlns:dt="urn:schemas-microsoft-com:datatypes"><Description dt:dt="string">E-Prime Primary Realtime Clock</Description><StartTime><Timestamp dt:dt="int">0</Timestamp><DateUtc dt:dt="string">2021-10-21T10:44:38Z</DateUtc></StartTime><FrequencyChanges><FrequencyChange><Frequency dt:dt="r8">10000000</Frequency><Timestamp dt:dt="r8">17122103608621</Timestamp><Current dt:…	59.959	1.0.0.17	1	-1928908105	2.0.10.182	10-21-2021	2021-10-21 10:44:39	18:44:39	2.0.10.92	1	affpro	WordList	1	1	1	18	j	NULL	NULL	NULL	NULL	NULL	1	NULL	NULL	NULL	NULL	NULL	NULL	NULL	3	5	18	NULL	NULL	NULL	pra1	practiceList1	不成熟的	1	j	-999999	9	69625	0	j
大创sc-iat	1	1	<?xml version="1.0"?>\n<Clock xmlns:dt="urn:schemas-microsoft-com:datatypes"><Description dt:dt="string">E-Prime Primary Realtime Clock</Description><StartTime><Timestamp dt:dt="int">0</Timestamp><DateUtc dt:dt="string">2021-10-21T10:44:38Z</DateUtc></StartTime><FrequencyChanges><FrequencyChange><Frequency dt:dt="r8">10000000</Frequency><Timestamp dt:dt="r8">17122103608621</Timestamp><Current dt:…	59.959	1.0.0.17	1	-1928908105	2.0.10.182	10-21-2021	2021-10-21 10:44:39	18:44:39	2.0.10.92	1	affpro	WordList	1	1	1	19	j	NULL	NULL	NULL	NULL	NULL	4	NULL	NULL	NULL	NULL	NULL	NULL	NULL	3	5	19	NULL	NULL	NULL	pra1	practiceList1	有争议的	1	j	-999999	0	71074	0	j
大创sc-iat	1	1	<?xml version="1.0"?>\n<Clock xmlns:dt="urn:schemas-microsoft-com:datatypes"><Description dt:dt="string">E-Prime Primary Realtime Clock</Description><StartTime><Timestamp dt:dt="int">0</Timestamp><DateUtc dt:dt="string">2021-10-21T10:44:38Z</DateUtc></StartTime><FrequencyChanges><FrequencyChange><Frequency dt:dt="r8">10000000</Frequency><Timestamp dt:dt="r8">17122103608621</Timestamp><Current dt:…	59.959	1.0.0.17	1	-1928908105	2.0.10.182	10-21-2021	2021-10-21 10:44:39	18:44:39	2.0.10.92	1	affpro	WordList	1	1	1	20	f	NULL	NULL	NULL	NULL	NULL	NULL	NULL	NULL	NULL	2	NULL	NULL	NULL	2	5	20	NULL	NULL	NULL	pra1	practiceList1	高产的	1	f	-999999	-1	72782	0	f
大创sc-iat	1	1	<?xml version="1.0"?>\n<Clock xmlns:dt="urn:schemas-microsoft-com:datatypes"><Description dt:dt="string">E-Prime Primary Realtime Clock</Description><StartTime><Timestamp dt:dt="int">0</Timestamp><DateUtc dt:dt="string">2021-10-21T10:44:38Z</DateUtc></StartTime><FrequencyChanges><FrequencyChange><Frequency dt:dt="r8">10000000</Frequency><Timestamp dt:dt="r8">17122103608621</Timestamp><Current dt:…	59.959	1.0.0.17	1	-1928908105	2.0.10.182	10-21-2021	2021-10-21 10:44:39	18:44:39	2.0.10.92	1	affpro	WordList	1	1	1	21	f	NULL	3	NULL	NULL	NULL	NULL	NULL	NULL	NULL	NULL	NULL	NULL	NULL	1	6	21	NULL	NULL	NULL	pra1	practiceList1	转基因大豆	1	f	-999999	-2	74100	0	f
大创sc-iat	1	1	<?xml version="1.0"?>\n<Clock xmlns:dt="urn:schemas-microsoft-com:datatypes"><Description dt:dt="string">E-Prime Primary Realtime Clock</Description><StartTime><Timestamp dt:dt="int">0</Timestamp><DateUtc dt:dt="string">2021-10-21T10:44:38Z</DateUtc></StartTime><FrequencyChanges><FrequencyChange><Frequency dt:dt="r8">10000000</Frequency><Timestamp dt:dt="r8">17122103608621</Timestamp><Current dt:…	59.959	1.0.0.17	1	-1928908105	2.0.10.182	10-21-2021	2021-10-21 10:44:39	18:44:39	2.0.10.92	1	affpro	WordList	1	1	1	22	j	NULL	NULL	NULL	NULL	NULL	3	NULL	NULL	NULL	NULL	NULL	NULL	NULL	3	6	22	NULL	NULL	NULL	pra1	practiceList1	非天然的	1	j	-999999	0	75477	0	j
大创sc-iat	1	1	<?xml version="1.0"?>\n<Clock xmlns:dt="urn:schemas-microsoft-com:datatypes"><Description dt:dt="string">E-Prime Primary Realtime Clock</Description><StartTime><Timestamp dt:dt="int">0</Timestamp><DateUtc dt:dt="string">2021-10-21T10:44:38Z</DateUtc></StartTime><FrequencyChanges><FrequencyChange><Frequency dt:dt="r8">10000000</Frequency><Timestamp dt:dt="r8">17122103608621</Timestamp><Current dt:…	59.959	1.0.0.17	1	-1928908105	2.0.10.182	10-21-2021	2021-10-21 10:44:39	18:44:39	2.0.10.92	1	affpro	WordList	1	1	1	23	f	NULL	NULL	NULL	NULL	NULL	NULL	NULL	NULL	NULL	3	NULL	NULL	NULL	2	6	23	NULL	NULL	NULL	pra1	practiceList1	高科技的	1	f	-999999	-1	77551	0	f
大创sc-iat	1	1	<?xml version="1.0"?>\n<Clock xmlns:dt="urn:schemas-microsoft-com:datatypes"><Description dt:dt="string">E-Prime Primary Realtime Clock</Description><StartTime><Timestamp dt:dt="int">0</Timestamp><DateUtc dt:dt="string">2021-10-21T10:44:38Z</DateUtc></StartTime><FrequencyChanges><FrequencyChange><Frequency dt:dt="r8">10000000</Frequency><Timestamp dt:dt="r8">17122103608621</Timestamp><Current dt:…	59.959	1.0.0.17	1	-1928908105	2.0.10.182	10-21-2021	2021-10-21 10:44:39	18:44:39	2.0.10.92	1	affpro	WordList	1	1	1	24	j	NULL	NULL	NULL	NULL	NULL	2	NULL	NULL	NULL	NULL	NULL	NULL	NULL	3	6	24	NULL	NULL	NULL	pra1	practiceList1	高风险的	0	j	-999999	-2	78930	0	f
大创sc-iat	1	1	<?xml version="1.0"?>\n<Clock xmlns:dt="urn:schemas-microsoft-com:datatypes"><Description dt:dt="string">E-Prime Primary Realtime Clock</Description><StartTime><Timestamp dt:dt="int">0</Timestamp><DateUtc dt:dt="string">2021-10-21T10:44:38Z</DateUtc></StartTime><FrequencyChanges><FrequencyChange><Frequency dt:dt="r8">10000000</Frequency><Timestamp dt:dt="r8">17122103608621</Timestamp><Current dt:…	59.959	1.0.0.17	1	-1928908105	2.0.10.182	10-21-2021	2021-10-21 10:44:39	18:44:39	2.0.10.92	1	affpro	WordList	1	1	1	25	f	NULL	NULL	NULL	NULL	NULL	NULL	NULL	NULL	NULL	NULL	3	NULL	NULL	NULL	NULL	NULL	NULL	NULL	NULL	pra2	taskList1	高科技的	NULL	NULL	NULL	NULL	NULL	NULL	NULL
大创sc-iat	1	1	<?xml version="1.0"?>\n<Clock xmlns:dt="urn:schemas-microsoft-com:datatypes"><Description dt:dt="string">E-Prime Primary Realtime Clock</Description><StartTime><Timestamp dt:dt="int">0</Timestamp><DateUtc dt:dt="string">2021-10-21T10:44:38Z</DateUtc></StartTime><FrequencyChanges><FrequencyChange><Frequency dt:dt="r8">10000000</Frequency><Timestamp dt:dt="r8">17122103608621</Timestamp><Current dt:…	59.959	1.0.0.17	1	-1928908105	2.0.10.182	10-21-2021	2021-10-21 10:44:39	18:44:39	2.0.10.92	1	affpro	WordList	1	1	1	26	j	NULL	NULL	NULL	NULL	NULL	NULL	1	NULL	NULL	NULL	NULL	NULL	NULL	NULL	NULL	NULL	NULL	NULL	NULL	pra2	taskList1	不成熟的	NULL	NULL	NULL	NULL	NULL	NULL	NULL
大创sc-iat	1	1	<?xml version="1.0"?>\n<Clock xmlns:dt="urn:schemas-microsoft-com:datatypes"><Description dt:dt="string">E-Prime Primary Realtime Clock</Description><StartTime><Timestamp dt:dt="int">0</Timestamp><DateUtc dt:dt="string">2021-10-21T10:44:38Z</DateUtc></StartTime><FrequencyChanges><FrequencyChange><Frequency dt:dt="r8">10000000</Frequency><Timestamp dt:dt="r8">17122103608621</Timestamp><Current dt:…	59.959	1.0.0.17	1	-1928908105	2.0.10.182	10-21-2021	2021-10-21 10:44:39	18:44:39	2.0.10.92	1	affpro	WordList	1	1	1	27	f	NULL	NULL	4	NULL	NULL	NULL	NULL	NULL	NULL	NULL	NULL	NULL	NULL	NULL	NULL	NULL	NULL	NULL	NULL	pra2	taskList1	动物转基因	NULL	NULL	NULL	NULL	NULL	NULL	NULL
大创sc-iat	1	1	<?xml version="1.0"?>\n<Clock xmlns:dt="urn:schemas-microsoft-com:datatypes"><Description dt:dt="string">E-Prime Primary Realtime Clock</Description><StartTime><Timestamp dt:dt="int">0</Timestamp><DateUtc dt:dt="string">2021-10-21T10:44:38Z</DateUtc></StartTime><FrequencyChanges><FrequencyChange><Frequency dt:dt="r8">10000000</Frequency><Timestamp dt:dt="r8">17122103608621</Timestamp><Current dt:…	59.959	1.0.0.17	1	-1928908105	2.0.10.182	10-21-2021	2021-10-21 10:44:39	18:44:39	2.0.10.92	1	affpro	WordList	1	1	1	28	j	NULL	NULL	NULL	NULL	NULL	NULL	3	NULL	NULL	NULL	NULL	NULL	NULL	NULL	NULL	NULL	NULL	NULL	NULL	pra2	taskList1	非天然的	NULL	NULL	NULL	NULL	NULL	NULL	NULL
大创sc-iat	1	1	<?xml version="1.0"?>\n<Clock xmlns:dt="urn:schemas-microsoft-com:datatypes"><Description dt:dt="string">E-Prime Primary Realtime Clock</Description><StartTime><Timestamp dt:dt="int">0</Timestamp><DateUtc dt:dt="string">2021-10-21T10:44:38Z</DateUtc></StartTime><FrequencyChanges><FrequencyChange><Frequency dt:dt="r8">10000000</Frequency><Timestamp dt:dt="r8">17122103608621</Timestamp><Current dt:…	59.959	1.0.0.17	1	-1928908105	2.0.10.182	10-21-2021	2021-10-21 10:44:39	18:44:39	2.0.10.92	1	affpro	WordList	1	1	1	29	f	NULL	NULL	NULL	NULL	NULL	NULL	NULL	NULL	NULL	NULL	4	NULL	NULL	NULL	NULL	NULL	NULL	NULL	NULL	pra2	taskList1	创新的	NULL	NULL	NULL	NULL	NULL	NULL	NULL
大创sc-iat	1	1	<?xml version="1.0"?>\n<Clock xmlns:dt="urn:schemas-microsoft-com:datatypes"><Description dt:dt="string">E-Prime Primary Realtime Clock</Description><StartTime><Timestamp dt:dt="int">0</Timestamp><DateUtc dt:dt="string">2021-10-21T10:44:38Z</DateUtc></StartTime><FrequencyChanges><FrequencyChange><Frequency dt:dt="r8">10000000</Frequency><Timestamp dt:dt="r8">17122103608621</Timestamp><Current dt:…	59.959	1.0.0.17	1	-1928908105	2.0.10.182	10-21-2021	2021-10-21 10:44:39	18:44:39	2.0.10.92	1	affpro	WordList	1	1	1	30	j	NULL	NULL	NULL	NULL	NULL	NULL	4	NULL	NULL	NULL	NULL	NULL	NULL	NULL	NULL	NULL	NULL	NULL	NULL	pra2	taskList1	有争议的	NULL	NULL	NULL	NULL	NULL	NULL	NULL
大创sc-iat	1	1	<?xml version="1.0"?>\n<Clock xmlns:dt="urn:schemas-microsoft-com:datatypes"><Description dt:dt="string">E-Prime Primary Realtime Clock</Description><StartTime><Timestamp dt:dt="int">0</Timestamp><DateUtc dt:dt="string">2021-10-21T10:44:38Z</DateUtc></StartTime><FrequencyChanges><FrequencyChange><Frequency dt:dt="r8">10000000</Frequency><Timestamp dt:dt="r8">17122103608621</Timestamp><Current dt:…	59.959	1.0.0.17	1	-1928908105	2.0.10.182	10-21-2021	2021-10-21 10:44:39	18:44:39	2.0.10.92	1	affpro	WordList	1	1	1	31	f	NULL	NULL	3	NULL	NULL	NULL	NULL	NULL	NULL	NULL	NULL	NULL	NULL	NULL	NULL	NULL	NULL	NULL	NULL	pra2	taskList1	转基因大豆	NULL	NULL	NULL	NULL	NULL	NULL	NULL
大创sc-iat	1	1	<?xml version="1.0"?>\n<Clock xmlns:dt="urn:schemas-microsoft-com:datatypes"><Description dt:dt="string">E-Prime Primary Realtime Clock</Description><StartTime><Timestamp dt:dt="int">0</Timestamp><DateUtc dt:dt="string">2021-10-21T10:44:38Z</DateUtc></StartTime><FrequencyChanges><FrequencyChange><Frequency dt:dt="r8">10000000</Frequency><Timestamp dt:dt="r8">17122103608621</Timestamp><Current dt:…	59.959	1.0.0.17	1	-1928908105	2.0.10.182	10-21-2021	2021-10-21 10:44:39	18:44:39	2.0.10.92	1	affpro	WordList	1	1	1	32	j	NULL	NULL	NULL	NULL	NULL	NULL	2	NULL	NULL	NULL	NULL	NULL	NULL	NULL	NULL	NULL	NULL	NULL	NULL	pra2	taskList1	高风险的	NULL	NULL	NULL	NULL	NULL	NULL	NULL
大创sc-iat	1	1	<?xml version="1.0"?>\n<Clock xmlns:dt="urn:schemas-microsoft-com:datatypes"><Description dt:dt="string">E-Prime Primary Realtime Clock</Description><StartTime><Timestamp dt:dt="int">0</Timestamp><DateUtc dt:dt="string">2021-10-21T10:44:38Z</DateUtc></StartTime><FrequencyChanges><FrequencyChange><Frequency dt:dt="r8">10000000</Frequency><Timestamp dt:dt="r8">17122103608621</Timestamp><Current dt:…	59.959	1.0.0.17	1	-1928908105	2.0.10.182	10-21-2021	2021-10-21 10:44:39	18:44:39	2.0.10.92	1	affpro	WordList	1	1	1	33	f	NULL	NULL	2	NULL	NULL	NULL	NULL	NULL	NULL	NULL	NULL	NULL	NULL	NULL	NULL	NULL	NULL	NULL	NULL	pra2	taskList1	抗虫害棉花	NULL	NULL	NULL	NULL	NULL	NULL	NULL
大创sc-iat	1	1	<?xml version="1.0"?>\n<Clock xmlns:dt="urn:schemas-microsoft-com:datatypes"><Description dt:dt="string">E-Prime Primary Realtime Clock</Description><StartTime><Timestamp dt:dt="int">0</Timestamp><DateUtc dt:dt="string">2021-10-21T10:44:38Z</DateUtc></StartTime><FrequencyChanges><FrequencyChange><Frequency dt:dt="r8">10000000</Frequency><Timestamp dt:dt="r8">17122103608621</Timestamp><Current dt:…	59.959	1.0.0.17	1	-1928908105	2.0.10.182	10-21-2021	2021-10-21 10:44:39	18:44:39	2.0.10.92	1	affpro	WordList	1	1	1	34	j	NULL	NULL	NULL	NULL	NULL	NULL	3	NULL	NULL	NULL	NULL	NULL	NULL	NULL	NULL	NULL	NULL	NULL	NULL	pra2	taskList1	非天然的	NULL	NULL	NULL	NULL	NULL	NULL	NULL
大创sc-iat	1	1	<?xml version="1.0"?>\n<Clock xmlns:dt="urn:schemas-microsoft-com:datatypes"><Description dt:dt="string">E-Prime Primary Realtime Clock</Description><StartTime><Timestamp dt:dt="int">0</Timestamp><DateUtc dt:dt="string">2021-10-21T10:44:38Z</DateUtc></StartTime><FrequencyChanges><FrequencyChange><Frequency dt:dt="r8">10000000</Frequency><Timestamp dt:dt="r8">17122103608621</Timestamp><Current dt:…	59.959	1.0.0.17	1	-1928908105	2.0.10.182	10-21-2021	2021-10-21 10:44:39	18:44:39	2.0.10.92	1	affpro	WordList	1	1	1	35	f	NULL	NULL	NULL	NULL	NULL	NULL	NULL	NULL	NULL	NULL	1	NULL	NULL	NULL	NULL	NULL	NULL	NULL	NULL	pra2	taskList1	科学的	NULL	NULL	NULL	NULL	NULL	NULL	NULL
大创sc-iat	1	1	<?xml version="1.0"?>\n<Clock xmlns:dt="urn:schemas-microsoft-com:datatypes"><Description dt:dt="string">E-Prime Primary Realtime Clock</Description><StartTime><Timestamp dt:dt="int">0</Timestamp><DateUtc dt:dt="string">2021-10-21T10:44:38Z</DateUtc></StartTime><FrequencyChanges><FrequencyChange><Frequency dt:dt="r8">10000000</Frequency><Timestamp dt:dt="r8">17122103608621</Timestamp><Current dt:…	59.959	1.0.0.17	1	-1928908105	2.0.10.182	10-21-2021	2021-10-21 10:44:39	18:44:39	2.0.10.92	1	affpro	WordList	1	1	1	36	j	NULL	NULL	NULL	NULL	NULL	NULL	4	NULL	NULL	NULL	NULL	NULL	NULL	NULL	NULL	NULL	NULL	NULL	NULL	pra2	taskList1	有争议的	NULL	NULL	NULL	NULL	NULL	NULL	NULL
大创sc-iat	1	1	<?xml version="1.0"?>\n<Clock xmlns:dt="urn:schemas-microsoft-com:datatypes"><Description dt:dt="string">E-Prime Primary Realtime Clock</Description><StartTime><Timestamp dt:dt="int">0</Timestamp><DateUtc dt:dt="string">2021-10-21T10:44:38Z</DateUtc></StartTime><FrequencyChanges><FrequencyChange><Frequency dt:dt="r8">10000000</Frequency><Timestamp dt:dt="r8">17122103608621</Timestamp><Current dt:…	59.959	1.0.0.17	1	-1928908105	2.0.10.182	10-21-2021	2021-10-21 10:44:39	18:44:39	2.0.10.92	1	affpro	WordList	1	1	1	37	f	NULL	NULL	1	NULL	NULL	NULL	NULL	NULL	NULL	NULL	NULL	NULL	NULL	NULL	NULL	NULL	NULL	NULL	NULL	pra2	taskList1	转基因食物	NULL	NULL	NULL	NULL	NULL	NULL	NULL
大创sc-iat	1	1	<?xml version="1.0"?>\n<Clock xmlns:dt="urn:schemas-microsoft-com:datatypes"><Description dt:dt="string">E-Prime Primary Realtime Clock</Description><StartTime><Timestamp dt:dt="int">0</Timestamp><DateUtc dt:dt="string">2021-10-21T10:44:38Z</DateUtc></StartTime><FrequencyChanges><FrequencyChange><Frequency dt:dt="r8">10000000</Frequency><Timestamp dt:dt="r8">17122103608621</Timestamp><Current dt:…	59.959	1.0.0.17	1	-1928908105	2.0.10.182	10-21-2021	2021-10-21 10:44:39	18:44:39	2.0.10.92	1	affpro	WordList	1	1	1	38	j	NULL	NULL	NULL	NULL	NULL	NULL	1	NULL	NULL	NULL	NULL	NULL	NULL	NULL	NULL	NULL	NULL	NULL	NULL	pra2	taskList1	不成熟的	NULL	NULL	NULL	NULL	NULL	NULL	NULL
大创sc-iat	1	1	<?xml version="1.0"?>\n<Clock xmlns:dt="urn:schemas-microsoft-com:datatypes"><Description dt:dt="string">E-Prime Primary Realtime Clock</Description><StartTime><Timestamp dt:dt="int">0</Timestamp><DateUtc dt:dt="string">2021-10-21T10:44:38Z</DateUtc></StartTime><FrequencyChanges><FrequencyChange><Frequency dt:dt="r8">10000000</Frequency><Timestamp dt:dt="r8">17122103608621</Timestamp><Current dt:…	59.959	1.0.0.17	1	-1928908105	2.0.10.182	10-21-2021	2021-10-21 10:44:39	18:44:39	2.0.10.92	1	affpro	WordList	1	1	1	39	f	NULL	NULL	NULL	NULL	NULL	NULL	NULL	NULL	NULL	NULL	2	NULL	NULL	NULL	NULL	NULL	NULL	NULL	NULL	pra2	taskList1	高产的	NULL	NULL	NULL	NULL	NULL	NULL	NULL
大创sc-iat	1	1	<?xml version="1.0"?>\n<Clock xmlns:dt="urn:schemas-microsoft-com:datatypes"><Description dt:dt="string">E-Prime Primary Realtime Clock</Description><StartTime><Timestamp dt:dt="int">0</Timestamp><DateUtc dt:dt="string">2021-10-21T10:44:38Z</DateUtc></StartTime><FrequencyChanges><FrequencyChange><Frequency dt:dt="r8">10000000</Frequency><Timestamp dt:dt="r8">17122103608621</Timestamp><Current dt:…	59.959	1.0.0.17	1	-1928908105	2.0.10.182	10-21-2021	2021-10-21 10:44:39	18:44:39	2.0.10.92	1	affpro	WordList	1	1	1	40	j	NULL	NULL	NULL	NULL	NULL	NULL	2	NULL	NULL	NULL	NULL	NULL	NULL	NULL	NULL	NULL	NULL	NULL	NULL	pra2	taskList1	高风险的	NULL	NULL	NULL	NULL	NULL	NULL	NULL
大创sc-iat	1	1	<?xml version="1.0"?>\n<Clock xmlns:dt="urn:schemas-microsoft-com:datatypes"><Description dt:dt="string">E-Prime Primary Realtime Clock</Description><StartTime><Timestamp dt:dt="int">0</Timestamp><DateUtc dt:dt="string">2021-10-21T10:44:38Z</DateUtc></StartTime><FrequencyChanges><FrequencyChange><Frequency dt:dt="r8">10000000</Frequency><Timestamp dt:dt="r8">17122103608621</Timestamp><Current dt:…	59.959	1.0.0.17	1	-1928908105	2.0.10.182	10-21-2021	2021-10-21 10:44:39	18:44:39	2.0.10.92	1	affpro	WordList	1	1	1	41	f	NULL	NULL	NULL	NULL	NULL	NULL	NULL	NULL	NULL	NULL	3	NULL	NULL	NULL	NULL	NULL	NULL	NULL	NULL	pra2	taskList1	高科技的	NULL	NULL	NULL	NULL	NULL	NULL	NULL
大创sc-iat	1	1	<?xml version="1.0"?>\n<Clock xmlns:dt="urn:schemas-microsoft-com:datatypes"><Description dt:dt="string">E-Prime Primary Realtime Clock</Description><StartTime><Timestamp dt:dt="int">0</Timestamp><DateUtc dt:dt="string">2021-10-21T10:44:38Z</DateUtc></StartTime><FrequencyChanges><FrequencyChange><Frequency dt:dt="r8">10000000</Frequency><Timestamp dt:dt="r8">17122103608621</Timestamp><Current dt:…	59.959	1.0.0.17	1	-1928908105	2.0.10.182	10-21-2021	2021-10-21 10:44:39	18:44:39	2.0.10.92	1	affpro	WordList	1	1	1	42	j	NULL	NULL	NULL	NULL	NULL	NULL	3	NULL	NULL	NULL	NULL	NULL	NULL	NULL	NULL	NULL	NULL	NULL	NULL	pra2	taskList1	非天然的	NULL	NULL	NULL	NULL	NULL	NULL	NULL
大创sc-iat	1	1	<?xml version="1.0"?>\n<Clock xmlns:dt="urn:schemas-microsoft-com:datatypes"><Description dt:dt="string">E-Prime Primary Realtime Clock</Description><StartTime><Timestamp dt:dt="int">0</Timestamp><DateUtc dt:dt="string">2021-10-21T10:44:38Z</DateUtc></StartTime><FrequencyChanges><FrequencyChange><Frequency dt:dt="r8">10000000</Frequency><Timestamp dt:dt="r8">17122103608621</Timestamp><Current dt:…	59.959	1.0.0.17	1	-1928908105	2.0.10.182	10-21-2021	2021-10-21 10:44:39	18:44:39	2.0.10.92	1	affpro	WordList	1	1	1	43	j	NULL	NULL	NULL	NULL	NULL	NULL	4	NULL	NULL	NULL	NULL	NULL	NULL	NULL	NULL	NULL	NULL	NULL	NULL	pra2	taskList1	有争议的	NULL	NULL	NULL	NULL	NULL	NULL	NULL
大创sc-iat	1	1	<?xml version="1.0"?>\n<Clock xmlns:dt="urn:schemas-microsoft-com:datatypes"><Description dt:dt="string">E-Prime Primary Realtime Clock</Description><StartTime><Timestamp dt:dt="int">0</Timestamp><DateUtc dt:dt="string">2021-10-21T10:44:38Z</DateUtc></StartTime><FrequencyChanges><FrequencyChange><Frequency dt:dt="r8">10000000</Frequency><Timestamp dt:dt="r8">17122103608621</Timestamp><Current dt:…	59.959	1.0.0.17	1	-1928908105	2.0.10.182	10-21-2021	2021-10-21 10:44:39	18:44:39	2.0.10.92	1	affpro	WordList	1	1	1	44	f	NULL	NULL	4	NULL	NULL	NULL	NULL	NULL	NULL	NULL	NULL	NULL	NULL	NULL	NULL	NULL	NULL	NULL	NULL	pra2	taskList1	动物转基因	NULL	NULL	NULL	NULL	NULL	NULL	NULL
大创sc-iat	1	1	<?xml version="1.0"?>\n<Clock xmlns:dt="urn:schemas-microsoft-com:datatypes"><Description dt:dt="string">E-Prime Primary Realtime Clock</Description><StartTime><Timestamp dt:dt="int">0</Timestamp><DateUtc dt:dt="string">2021-10-21T10:44:38Z</DateUtc></StartTime><FrequencyChanges><FrequencyChange><Frequency dt:dt="r8">10000000</Frequency><Timestamp dt:dt="r8">17122103608621</Timestamp><Current dt:…	59.959	1.0.0.17	1	-1928908105	2.0.10.182	10-21-2021	2021-10-21 10:44:39	18:44:39	2.0.10.92	1	affpro	WordList	1	1	1	45	f	NULL	NULL	NULL	NULL	NULL	NULL	NULL	NULL	NULL	NULL	2	NULL	NULL	NULL	NULL	NULL	NULL	NULL	NULL	pra2	taskList1	高产的	NULL	NULL	NULL	NULL	NULL	NULL	NULL
大创sc-iat	1	1	<?xml version="1.0"?>\n<Clock xmlns:dt="urn:schemas-microsoft-com:datatypes"><Description dt:dt="string">E-Prime Primary Realtime Clock</Description><StartTime><Timestamp dt:dt="int">0</Timestamp><DateUtc dt:dt="string">2021-10-21T10:44:38Z</DateUtc></StartTime><FrequencyChanges><FrequencyChange><Frequency dt:dt="r8">10000000</Frequency><Timestamp dt:dt="r8">17122103608621</Timestamp><Current dt:…	59.959	1.0.0.17	1	-1928908105	2.0.10.182	10-21-2021	2021-10-21 10:44:39	18:44:39	2.0.10.92	1	affpro	WordList	1	1	1	46	f	NULL	NULL	2	NULL	NULL	NULL	NULL	NULL	NULL	NULL	NULL	NULL	NULL	NULL	NULL	NULL	NULL	NULL	NULL	pra2	taskList1	抗虫害棉花	NULL	NULL	NULL	NULL	NULL	NULL	NULL
大创sc-iat	1	1	<?xml version="1.0"?>\n<Clock xmlns:dt="urn:schemas-microsoft-com:datatypes"><Description dt:dt="string">E-Prime Primary Realtime Clock</Description><StartTime><Timestamp dt:dt="int">0</Timestamp><DateUtc dt:dt="string">2021-10-21T10:44:38Z</DateUtc></StartTime><FrequencyChanges><FrequencyChange><Frequency dt:dt="r8">10000000</Frequency><Timestamp dt:dt="r8">17122103608621</Timestamp><Current dt:…	59.959	1.0.0.17	1	-1928908105	2.0.10.182	10-21-2021	2021-10-21 10:44:39	18:44:39	2.0.10.92	1	affpro	WordList	1	1	1	47	j	NULL	NULL	NULL	NULL	NULL	NULL	2	NULL	NULL	NULL	NULL	NULL	NULL	NULL	NULL	NULL	NULL	NULL	NULL	pra2	taskList1	高风险的	NULL	NULL	NULL	NULL	NULL	NULL	NULL
大创sc-iat	1	1	<?xml version="1.0"?>\n<Clock xmlns:dt="urn:schemas-microsoft-com:datatypes"><Description dt:dt="string">E-Prime Primary Realtime Clock</Description><StartTime><Timestamp dt:dt="int">0</Timestamp><DateUtc dt:dt="string">2021-10-21T10:44:38Z</DateUtc></StartTime><FrequencyChanges><FrequencyChange><Frequency dt:dt="r8">10000000</Frequency><Timestamp dt:dt="r8">17122103608621</Timestamp><Current dt:…	59.959	1.0.0.17	1	-1928908105	2.0.10.182	10-21-2021	2021-10-21 10:44:39	18:44:39	2.0.10.92	1	affpro	WordList	1	1	1	48	j	NULL	NULL	NULL	NULL	NULL	NULL	1	NULL	NULL	NULL	NULL	NULL	NULL	NULL	NULL	NULL	NULL	NULL	NULL	pra2	taskList1	不成熟的	NULL	NULL	NULL	NULL	NULL	NULL	NULL
大创sc-iat	1	1	<?xml version="1.0"?>\n<Clock xmlns:dt="urn:schemas-microsoft-com:datatypes"><Description dt:dt="string">E-Prime Primary Realtime Clock</Description><StartTime><Timestamp dt:dt="int">0</Timestamp><DateUtc dt:dt="string">2021-10-21T10:44:38Z</DateUtc></StartTime><FrequencyChanges><FrequencyChange><Frequency dt:dt="r8">10000000</Frequency><Timestamp dt:dt="r8">17122103608621</Timestamp><Current dt:…	59.959	1.0.0.17	1	-1928908105	2.0.10.182	10-21-2021	2021-10-21 10:44:39	18:44:39	2.0.10.92	1	affpro	WordList	1	1	1	49	f	NULL	NULL	1	NULL	NULL	NULL	NULL	NULL	NULL	NULL	NULL	NULL	NULL	NULL	NULL	NULL	NULL	NULL	NULL	pra2	taskList1	转基因食物	NULL	NULL	NULL	NULL	NULL	NULL	NULL
大创sc-iat	1	1	<?xml version="1.0"?>\n<Clock xmlns:dt="urn:schemas-microsoft-com:datatypes"><Description dt:dt="string">E-Prime Primary Realtime Clock</Description><StartTime><Timestamp dt:dt="int">0</Timestamp><DateUtc dt:dt="string">2021-10-21T10:44:38Z</DateUtc></StartTime><FrequencyChanges><FrequencyChange><Frequency dt:dt="r8">10000000</Frequency><Timestamp dt:dt="r8">17122103608621</Timestamp><Current dt:…	59.959	1.0.0.17	1	-1928908105	2.0.10.182	10-21-2021	2021-10-21 10:44:39	18:44:39	2.0.10.92	1	affpro	WordList	1	1	1	50	j	NULL	NULL	NULL	NULL	NULL	NULL	3	NULL	NULL	NULL	NULL	NULL	NULL	NULL	NULL	NULL	NULL	NULL	NULL	pra2	taskList1	非天然的	NULL	NULL	NULL	NULL	NULL	NULL	NULL
大创sc-iat	1	1	<?xml version="1.0"?>\n<Clock xmlns:dt="urn:schemas-microsoft-com:datatypes"><Description dt:dt="string">E-Prime Primary Realtime Clock</Description><StartTime><Timestamp dt:dt="int">0</Timestamp><DateUtc dt:dt="string">2021-10-21T10:44:38Z</DateUtc></StartTime><FrequencyChanges><FrequencyChange><Frequency dt:dt="r8">10000000</Frequency><Timestamp dt:dt="r8">17122103608621</Timestamp><Current dt:…	59.959	1.0.0.17	1	-1928908105	2.0.10.182	10-21-2021	2021-10-21 10:44:39	18:44:39	2.0.10.92	1	affpro	WordList	1	1	1	51	f	NULL	NULL	NULL	NULL	NULL	NULL	NULL	NULL	NULL	NULL	4	NULL	NULL	NULL	NULL	NULL	NULL	NULL	NULL	pra2	taskList1	创新的	NULL	NULL	NULL	NULL	NULL	NULL	NULL
大创sc-iat	1	1	<?xml version="1.0"?>\n<Clock xmlns:dt="urn:schemas-microsoft-com:datatypes"><Description dt:dt="string">E-Prime Primary Realtime Clock</Description><StartTime><Timestamp dt:dt="int">0</Timestamp><DateUtc dt:dt="string">2021-10-21T10:44:38Z</DateUtc></StartTime><FrequencyChanges><FrequencyChange><Frequency dt:dt="r8">10000000</Frequency><Timestamp dt:dt="r8">17122103608621</Timestamp><Current dt:…	59.959	1.0.0.17	1	-1928908105	2.0.10.182	10-21-2021	2021-10-21 10:44:39	18:44:39	2.0.10.92	1	affpro	WordList	1	1	1	52	j	NULL	NULL	NULL	NULL	NULL	NULL	1	NULL	NULL	NULL	NULL	NULL	NULL	NULL	NULL	NULL	NULL	NULL	NULL	pra2	taskList1	不成熟的	NULL	NULL	NULL	NULL	NULL	NULL	NULL
大创sc-iat	1	1	<?xml version="1.0"?>\n<Clock xmlns:dt="urn:schemas-microsoft-com:datatypes"><Description dt:dt="string">E-Prime Primary Realtime Clock</Description><StartTime><Timestamp dt:dt="int">0</Timestamp><DateUtc dt:dt="string">2021-10-21T10:44:38Z</DateUtc></StartTime><FrequencyChanges><FrequencyChange><Frequency dt:dt="r8">10000000</Frequency><Timestamp dt:dt="r8">17122103608621</Timestamp><Current dt:…	59.959	1.0.0.17	1	-1928908105	2.0.10.182	10-21-2021	2021-10-21 10:44:39	18:44:39	2.0.10.92	1	affpro	WordList	1	1	1	53	f	NULL	NULL	NULL	NULL	NULL	NULL	NULL	NULL	NULL	NULL	1	NULL	NULL	NULL	NULL	NULL	NULL	NULL	NULL	pra2	taskList1	科学的	NULL	NULL	NULL	NULL	NULL	NULL	NULL
大创sc-iat	1	1	<?xml version="1.0"?>\n<Clock xmlns:dt="urn:schemas-microsoft-com:datatypes"><Description dt:dt="string">E-Prime Primary Realtime Clock</Description><StartTime><Timestamp dt:dt="int">0</Timestamp><DateUtc dt:dt="string">2021-10-21T10:44:38Z</DateUtc></StartTime><FrequencyChanges><FrequencyChange><Frequency dt:dt="r8">10000000</Frequency><Timestamp dt:dt="r8">17122103608621</Timestamp><Current dt:…	59.959	1.0.0.17	1	-1928908105	2.0.10.182	10-21-2021	2021-10-21 10:44:39	18:44:39	2.0.10.92	1	affpro	WordList	1	1	1	54	j	NULL	NULL	NULL	NULL	NULL	NULL	2	NULL	NULL	NULL	NULL	NULL	NULL	NULL	NULL	NULL	NULL	NULL	NULL	pra2	taskList1	高风险的	NULL	NULL	NULL	NULL	NULL	NULL	NULL
大创sc-iat	1	1	<?xml version="1.0"?>\n<Clock xmlns:dt="urn:schemas-microsoft-com:datatypes"><Description dt:dt="string">E-Prime Primary Realtime Clock</Description><StartTime><Timestamp dt:dt="int">0</Timestamp><DateUtc dt:dt="string">2021-10-21T10:44:38Z</DateUtc></StartTime><FrequencyChanges><FrequencyChange><Frequency dt:dt="r8">10000000</Frequency><Timestamp dt:dt="r8">17122103608621</Timestamp><Current dt:…	59.959	1.0.0.17	1	-1928908105	2.0.10.182	10-21-2021	2021-10-21 10:44:39	18:44:39	2.0.10.92	1	affpro	WordList	1	1	1	55	f	NULL	NULL	3	NULL	NULL	NULL	NULL	NULL	NULL	NULL	NULL	NULL	NULL	NULL	NULL	NULL	NULL	NULL	NULL	pra2	taskList1	转基因大豆	NULL	NULL	NULL	NULL	NULL	NULL	NULL
大创sc-iat	1	1	<?xml version="1.0"?>\n<Clock xmlns:dt="urn:schemas-microsoft-com:datatypes"><Description dt:dt="string">E-Prime Primary Realtime Clock</Description><StartTime><Timestamp dt:dt="int">0</Timestamp><DateUtc dt:dt="string">2021-10-21T10:44:38Z</DateUtc></StartTime><FrequencyChanges><FrequencyChange><Frequency dt:dt="r8">10000000</Frequency><Timestamp dt:dt="r8">17122103608621</Timestamp><Current dt:…	59.959	1.0.0.17	1	-1928908105	2.0.10.182	10-21-2021	2021-10-21 10:44:39	18:44:39	2.0.10.92	1	affpro	WordList	1	1	1	56	j	NULL	NULL	NULL	NULL	NULL	NULL	4	NULL	NULL	NULL	NULL	NULL	NULL	NULL	NULL	NULL	NULL	NULL	NULL	pra2	taskList1	有争议的	NULL	NULL	NULL	NULL	NULL	NULL	NULL
大创sc-iat	1	1	<?xml version="1.0"?>\n<Clock xmlns:dt="urn:schemas-microsoft-com:datatypes"><Description dt:dt="string">E-Prime Primary Realtime Clock</Description><StartTime><Timestamp dt:dt="int">0</Timestamp><DateUtc dt:dt="string">2021-10-21T10:44:38Z</DateUtc></StartTime><FrequencyChanges><FrequencyChange><Frequency dt:dt="r8">10000000</Frequency><Timestamp dt:dt="r8">17122103608621</Timestamp><Current dt:…	59.959	1.0.0.17	1	-1928908105	2.0.10.182	10-21-2021	2021-10-21 10:44:39	18:44:39	2.0.10.92	1	affpro	WordList	1	1	1	57	f	NULL	NULL	1	NULL	NULL	NULL	NULL	NULL	NULL	NULL	NULL	NULL	NULL	NULL	NULL	NULL	NULL	NULL	NULL	pra2	taskList1	转基因食物	NULL	NULL	NULL	NULL	NULL	NULL	NULL
大创sc-iat	1	1	<?xml version="1.0"?>\n<Clock xmlns:dt="urn:schemas-microsoft-com:datatypes"><Description dt:dt="string">E-Prime Primary Realtime Clock</Description><StartTime><Timestamp dt:dt="int">0</Timestamp><DateUtc dt:dt="string">2021-10-21T10:44:38Z</DateUtc></StartTime><FrequencyChanges><FrequencyChange><Frequency dt:dt="r8">10000000</Frequency><Timestamp dt:dt="r8">17122103608621</Timestamp><Current dt:…	59.959	1.0.0.17	1	-1928908105	2.0.10.182	10-21-2021	2021-10-21 10:44:39	18:44:39	2.0.10.92	1	affpro	WordList	1	1	1	58	j	NULL	NULL	NULL	NULL	NULL	NULL	2	NULL	NULL	NULL	NULL	NULL	NULL	NULL	NULL	NULL	NULL	NULL	NULL	pra2	taskList1	高风险的	NULL	NULL	NULL	NULL	NULL	NULL	NULL
大创sc-iat	1	1	<?xml version="1.0"?>\n<Clock xmlns:dt="urn:schemas-microsoft-com:datatypes"><Description dt:dt="string">E-Prime Primary Realtime Clock</Description><StartTime><Timestamp dt:dt="int">0</Timestamp><DateUtc dt:dt="string">2021-10-21T10:44:38Z</DateUtc></StartTime><FrequencyChanges><FrequencyChange><Frequency dt:dt="r8">10000000</Frequency><Timestamp dt:dt="r8">17122103608621</Timestamp><Current dt:…	59.959	1.0.0.17	1	-1928908105	2.0.10.182	10-21-2021	2021-10-21 10:44:39	18:44:39	2.0.10.92	1	affpro	WordList	1	1	1	59	f	NULL	NULL	NULL	NULL	NULL	NULL	NULL	NULL	NULL	NULL	2	NULL	NULL	NULL	NULL	NULL	NULL	NULL	NULL	pra2	taskList1	高产的	NULL	NULL	NULL	NULL	NULL	NULL	NULL
大创sc-iat	1	1	<?xml version="1.0"?>\n<Clock xmlns:dt="urn:schemas-microsoft-com:datatypes"><Description dt:dt="string">E-Prime Primary Realtime Clock</Description><StartTime><Timestamp dt:dt="int">0</Timestamp><DateUtc dt:dt="string">2021-10-21T10:44:38Z</DateUtc></StartTime><FrequencyChanges><FrequencyChange><Frequency dt:dt="r8">10000000</Frequency><Timestamp dt:dt="r8">17122103608621</Timestamp><Current dt:…	59.959	1.0.0.17	1	-1928908105	2.0.10.182	10-21-2021	2021-10-21 10:44:39	18:44:39	2.0.10.92	1	affpro	WordList	1	1	1	60	j	NULL	NULL	NULL	NULL	NULL	NULL	3	NULL	NULL	NULL	NULL	NULL	NULL	NULL	NULL	NULL	NULL	NULL	NULL	pra2	taskList1	非天然的	NULL	NULL	NULL	NULL	NULL	NULL	NULL
大创sc-iat	1	1	<?xml version="1.0"?>\n<Clock xmlns:dt="urn:schemas-microsoft-com:datatypes"><Description dt:dt="string">E-Prime Primary Realtime Clock</Description><StartTime><Timestamp dt:dt="int">0</Timestamp><DateUtc dt:dt="string">2021-10-21T10:44:38Z</DateUtc></StartTime><FrequencyChanges><FrequencyChange><Frequency dt:dt="r8">10000000</Frequency><Timestamp dt:dt="r8">17122103608621</Timestamp><Current dt:…	59.959	1.0.0.17	1	-1928908105	2.0.10.182	10-21-2021	2021-10-21 10:44:39	18:44:39	2.0.10.92	1	affpro	WordList	1	1	1	61	f	NULL	NULL	3	NULL	NULL	NULL	NULL	NULL	NULL	NULL	NULL	NULL	NULL	NULL	NULL	NULL	NULL	NULL	NULL	pra2	taskList1	转基因大豆	NULL	NULL	NULL	NULL	NULL	NULL	NULL
大创sc-iat	1	1	<?xml version="1.0"?>\n<Clock xmlns:dt="urn:schemas-microsoft-com:datatypes"><Description dt:dt="string">E-Prime Primary Realtime Clock</Description><StartTime><Timestamp dt:dt="int">0</Timestamp><DateUtc dt:dt="string">2021-10-21T10:44:38Z</DateUtc></StartTime><FrequencyChanges><FrequencyChange><Frequency dt:dt="r8">10000000</Frequency><Timestamp dt:dt="r8">17122103608621</Timestamp><Current dt:…	59.959	1.0.0.17	1	-1928908105	2.0.10.182	10-21-2021	2021-10-21 10:44:39	18:44:39	2.0.10.92	1	affpro	WordList	1	1	1	62	f	NULL	NULL	NULL	NULL	NULL	NULL	NULL	NULL	NULL	NULL	1	NULL	NULL	NULL	NULL	NULL	NULL	NULL	NULL	pra2	taskList1	科学的	NULL	NULL	NULL	NULL	NULL	NULL	NULL
大创sc-iat	1	1	<?xml version="1.0"?>\n<Clock xmlns:dt="urn:schemas-microsoft-com:datatypes"><Description dt:dt="string">E-Prime Primary Realtime Clock</Description><StartTime><Timestamp dt:dt="int">0</Timestamp><DateUtc dt:dt="string">2021-10-21T10:44:38Z</DateUtc></StartTime><FrequencyChanges><FrequencyChange><Frequency dt:dt="r8">10000000</Frequency><Timestamp dt:dt="r8">17122103608621</Timestamp><Current dt:…	59.959	1.0.0.17	1	-1928908105	2.0.10.182	10-21-2021	2021-10-21 10:44:39	18:44:39	2.0.10.92	1	affpro	WordList	1	1	1	63	j	NULL	NULL	NULL	NULL	NULL	NULL	1	NULL	NULL	NULL	NULL	NULL	NULL	NULL	NULL	NULL	NULL	NULL	NULL	pra2	taskList1	不成熟的	NULL	NULL	NULL	NULL	NULL	NULL	NULL
大创sc-iat	1	1	<?xml version="1.0"?>\n<Clock xmlns:dt="urn:schemas-microsoft-com:datatypes"><Description dt:dt="string">E-Prime Primary Realtime Clock</Description><StartTime><Timestamp dt:dt="int">0</Timestamp><DateUtc dt:dt="string">2021-10-21T10:44:38Z</DateUtc></StartTime><FrequencyChanges><FrequencyChange><Frequency dt:dt="r8">10000000</Frequency><Timestamp dt:dt="r8">17122103608621</Timestamp><Current dt:…	59.959	1.0.0.17	1	-1928908105	2.0.10.182	10-21-2021	2021-10-21 10:44:39	18:44:39	2.0.10.92	1	affpro	WordList	1	1	1	64	j	NULL	NULL	NULL	NULL	NULL	NULL	4	NULL	NULL	NULL	NULL	NULL	NULL	NULL	NULL	NULL	NULL	NULL	NULL	pra2	taskList1	有争议的	NULL	NULL	NULL	NULL	NULL	NULL	NULL
大创sc-iat	1	1	<?xml version="1.0"?>\n<Clock xmlns:dt="urn:schemas-microsoft-com:datatypes"><Description dt:dt="string">E-Prime Primary Realtime Clock</Description><StartTime><Timestamp dt:dt="int">0</Timestamp><DateUtc dt:dt="string">2021-10-21T10:44:38Z</DateUtc></StartTime><FrequencyChanges><FrequencyChange><Frequency dt:dt="r8">10000000</Frequency><Timestamp dt:dt="r8">17122103608621</Timestamp><Current dt:…	59.959	1.0.0.17	1	-1928908105	2.0.10.182	10-21-2021	2021-10-21 10:44:39	18:44:39	2.0.10.92	1	affpro	WordList	1	1	1	65	f	NULL	NULL	NULL	NULL	NULL	NULL	NULL	NULL	NULL	NULL	4	NULL	NULL	NULL	NULL	NULL	NULL	NULL	NULL	pra2	taskList1	创新的	NULL	NULL	NULL	NULL	NULL	NULL	NULL
大创sc-iat	1	1	<?xml version="1.0"?>\n<Clock xmlns:dt="urn:schemas-microsoft-com:datatypes"><Description dt:dt="string">E-Prime Primary Realtime Clock</Description><StartTime><Timestamp dt:dt="int">0</Timestamp><DateUtc dt:dt="string">2021-10-21T10:44:38Z</DateUtc></StartTime><FrequencyChanges><FrequencyChange><Frequency dt:dt="r8">10000000</Frequency><Timestamp dt:dt="r8">17122103608621</Timestamp><Current dt:…	59.959	1.0.0.17	1	-1928908105	2.0.10.182	10-21-2021	2021-10-21 10:44:39	18:44:39	2.0.10.92	1	affpro	WordList	1	1	1	66	f	NULL	NULL	2	NULL	NULL	NULL	NULL	NULL	NULL	NULL	NULL	NULL	NULL	NULL	NULL	NULL	NULL	NULL	NULL	pra2	taskList1	抗虫害棉花	NULL	NULL	NULL	NULL	NULL	NULL	NULL
大创sc-iat	1	1	<?xml version="1.0"?>\n<Clock xmlns:dt="urn:schemas-microsoft-com:datatypes"><Description dt:dt="string">E-Prime Primary Realtime Clock</Description><StartTime><Timestamp dt:dt="int">0</Timestamp><DateUtc dt:dt="string">2021-10-21T10:44:38Z</DateUtc></StartTime><FrequencyChanges><FrequencyChange><Frequency dt:dt="r8">10000000</Frequency><Timestamp dt:dt="r8">17122103608621</Timestamp><Current dt:…	59.959	1.0.0.17	1	-1928908105	2.0.10.182	10-21-2021	2021-10-21 10:44:39	18:44:39	2.0.10.92	1	affpro	WordList	1	1	1	67	j	NULL	NULL	NULL	NULL	NULL	NULL	2	NULL	NULL	NULL	NULL	NULL	NULL	NULL	NULL	NULL	NULL	NULL	NULL	pra2	taskList1	高风险的	NULL	NULL	NULL	NULL	NULL	NULL	NULL
大创sc-iat	1	1	<?xml version="1.0"?>\n<Clock xmlns:dt="urn:schemas-microsoft-com:datatypes"><Description dt:dt="string">E-Prime Primary Realtime Clock</Description><StartTime><Timestamp dt:dt="int">0</Timestamp><DateUtc dt:dt="string">2021-10-21T10:44:38Z</DateUtc></StartTime><FrequencyChanges><FrequencyChange><Frequency dt:dt="r8">10000000</Frequency><Timestamp dt:dt="r8">17122103608621</Timestamp><Current dt:…	59.959	1.0.0.17	1	-1928908105	2.0.10.182	10-21-2021	2021-10-21 10:44:39	18:44:39	2.0.10.92	1	affpro	WordList	1	1	1	68	j	NULL	NULL	NULL	NULL	NULL	NULL	1	NULL	NULL	NULL	NULL	NULL	NULL	NULL	NULL	NULL	NULL	NULL	NULL	pra2	taskList1	不成熟的	NULL	NULL	NULL	NULL	NULL	NULL	NULL
大创sc-iat	1	1	<?xml version="1.0"?>\n<Clock xmlns:dt="urn:schemas-microsoft-com:datatypes"><Description dt:dt="string">E-Prime Primary Realtime Clock</Description><StartTime><Timestamp dt:dt="int">0</Timestamp><DateUtc dt:dt="string">2021-10-21T10:44:38Z</DateUtc></StartTime><FrequencyChanges><FrequencyChange><Frequency dt:dt="r8">10000000</Frequency><Timestamp dt:dt="r8">17122103608621</Timestamp><Current dt:…	59.959	1.0.0.17	1	-1928908105	2.0.10.182	10-21-2021	2021-10-21 10:44:39	18:44:39	2.0.10.92	1	affpro	WordList	1	1	1	69	f	NULL	NULL	NULL	NULL	NULL	NULL	NULL	NULL	NULL	NULL	3	NULL	NULL	NULL	NULL	NULL	NULL	NULL	NULL	pra2	taskList1	高科技的	NULL	NULL	NULL	NULL	NULL	NULL	NULL
大创sc-iat	1	1	<?xml version="1.0"?>\n<Clock xmlns:dt="urn:schemas-microsoft-com:datatypes"><Description dt:dt="string">E-Prime Primary Realtime Clock</Description><StartTime><Timestamp dt:dt="int">0</Timestamp><DateUtc dt:dt="string">2021-10-21T10:44:38Z</DateUtc></StartTime><FrequencyChanges><FrequencyChange><Frequency dt:dt="r8">10000000</Frequency><Timestamp dt:dt="r8">17122103608621</Timestamp><Current dt:…	59.959	1.0.0.17	1	-1928908105	2.0.10.182	10-21-2021	2021-10-21 10:44:39	18:44:39	2.0.10.92	1	affpro	WordList	1	1	1	70	f	NULL	NULL	4	NULL	NULL	NULL	NULL	NULL	NULL	NULL	NULL	NULL	NULL	NULL	NULL	NULL	NULL	NULL	NULL	pra2	taskList1	动物转基因	NULL	NULL	NULL	NULL	NULL	NULL	NULL
大创sc-iat	1	1	<?xml version="1.0"?>\n<Clock xmlns:dt="urn:schemas-microsoft-com:datatypes"><Description dt:dt="string">E-Prime Primary Realtime Clock</Description><StartTime><Timestamp dt:dt="int">0</Timestamp><DateUtc dt:dt="string">2021-10-21T10:44:38Z</DateUtc></StartTime><FrequencyChanges><FrequencyChange><Frequency dt:dt="r8">10000000</Frequency><Timestamp dt:dt="r8">17122103608621</Timestamp><Current dt:…	59.959	1.0.0.17	1	-1928908105	2.0.10.182	10-21-2021	2021-10-21 10:44:39	18:44:39	2.0.10.92	1	affpro	WordList	1	1	1	71	j	NULL	NULL	NULL	NULL	NULL	NULL	3	NULL	NULL	NULL	NULL	NULL	NULL	NULL	NULL	NULL	NULL	NULL	NULL	pra2	taskList1	非天然的	NULL	NULL	NULL	NULL	NULL	NULL	NULL
大创sc-iat	1	1	<?xml version="1.0"?>\n<Clock xmlns:dt="urn:schemas-microsoft-com:datatypes"><Description dt:dt="string">E-Prime Primary Realtime Clock</Description><StartTime><Timestamp dt:dt="int">0</Timestamp><DateUtc dt:dt="string">2021-10-21T10:44:38Z</DateUtc></StartTime><FrequencyChanges><FrequencyChange><Frequency dt:dt="r8">10000000</Frequency><Timestamp dt:dt="r8">17122103608621</Timestamp><Current dt:…	59.959	1.0.0.17	1	-1928908105	2.0.10.182	10-21-2021	2021-10-21 10:44:39	18:44:39	2.0.10.92	1	affpro	WordList	1	1	1	72	j	NULL	NULL	NULL	NULL	NULL	NULL	4	NULL	NULL	NULL	NULL	NULL	NULL	NULL	NULL	NULL	NULL	NULL	NULL	pra2	taskList1	有争议的	NULL	NULL	NULL	NULL	NULL	NULL	NULL
大创sc-iat	1	1	<?xml version="1.0"?>\n<Clock xmlns:dt="urn:schemas-microsoft-com:datatypes"><Description dt:dt="string">E-Prime Primary Realtime Clock</Description><StartTime><Timestamp dt:dt="int">0</Timestamp><DateUtc dt:dt="string">2021-10-21T10:44:38Z</DateUtc></StartTime><FrequencyChanges><FrequencyChange><Frequency dt:dt="r8">10000000</Frequency><Timestamp dt:dt="r8">17122103608621</Timestamp><Current dt:…	59.959	1.0.0.17	1	-1928908105	2.0.10.182	10-21-2021	2021-10-21 10:44:39	18:44:39	2.0.10.92	1	affpro	WordList	1	1	1	73	f	NULL	NULL	1	NULL	NULL	NULL	NULL	NULL	NULL	NULL	NULL	NULL	NULL	NULL	NULL	NULL	NULL	NULL	NULL	pra2	taskList1	转基因食物	NULL	NULL	NULL	NULL	NULL	NULL	NULL
大创sc-iat	1	1	<?xml version="1.0"?>\n<Clock xmlns:dt="urn:schemas-microsoft-com:datatypes"><Description dt:dt="string">E-Prime Primary Realtime Clock</Description><StartTime><Timestamp dt:dt="int">0</Timestamp><DateUtc dt:dt="string">2021-10-21T10:44:38Z</DateUtc></StartTime><FrequencyChanges><FrequencyChange><Frequency dt:dt="r8">10000000</Frequency><Timestamp dt:dt="r8">17122103608621</Timestamp><Current dt:…	59.959	1.0.0.17	1	-1928908105	2.0.10.182	10-21-2021	2021-10-21 10:44:39	18:44:39	2.0.10.92	1	affpro	WordList	1	1	1	74	j	NULL	NULL	NULL	NULL	NULL	NULL	1	NULL	NULL	NULL	NULL	NULL	NULL	NULL	NULL	NULL	NULL	NULL	NULL	pra2	taskList1	不成熟的	NULL	NULL	NULL	NULL	NULL	NULL	NULL
大创sc-iat	1	1	<?xml version="1.0"?>\n<Clock xmlns:dt="urn:schemas-microsoft-com:datatypes"><Description dt:dt="string">E-Prime Primary Realtime Clock</Description><StartTime><Timestamp dt:dt="int">0</Timestamp><DateUtc dt:dt="string">2021-10-21T10:44:38Z</DateUtc></StartTime><FrequencyChanges><FrequencyChange><Frequency dt:dt="r8">10000000</Frequency><Timestamp dt:dt="r8">17122103608621</Timestamp><Current dt:…	59.959	1.0.0.17	1	-1928908105	2.0.10.182	10-21-2021	2021-10-21 10:44:39	18:44:39	2.0.10.92	1	affpro	WordList	1	1	1	75	f	NULL	NULL	NULL	NULL	NULL	NULL	NULL	NULL	NULL	NULL	4	NULL	NULL	NULL	NULL	NULL	NULL	NULL	NULL	pra2	taskList1	创新的	NULL	NULL	NULL	NULL	NULL	NULL	NULL
大创sc-iat	1	1	<?xml version="1.0"?>\n<Clock xmlns:dt="urn:schemas-microsoft-com:datatypes"><Description dt:dt="string">E-Prime Primary Realtime Clock</Description><StartTime><Timestamp dt:dt="int">0</Timestamp><DateUtc dt:dt="string">2021-10-21T10:44:38Z</DateUtc></StartTime><FrequencyChanges><FrequencyChange><Frequency dt:dt="r8">10000000</Frequency><Timestamp dt:dt="r8">17122103608621</Timestamp><Current dt:…	59.959	1.0.0.17	1	-1928908105	2.0.10.182	10-21-2021	2021-10-21 10:44:39	18:44:39	2.0.10.92	1	affpro	WordList	1	1	1	76	j	NULL	NULL	NULL	NULL	NULL	NULL	2	NULL	NULL	NULL	NULL	NULL	NULL	NULL	NULL	NULL	NULL	NULL	NULL	pra2	taskList1	高风险的	NULL	NULL	NULL	NULL	NULL	NULL	NULL
大创sc-iat	1	1	<?xml version="1.0"?>\n<Clock xmlns:dt="urn:schemas-microsoft-com:datatypes"><Description dt:dt="string">E-Prime Primary Realtime Clock</Description><StartTime><Timestamp dt:dt="int">0</Timestamp><DateUtc dt:dt="string">2021-10-21T10:44:38Z</DateUtc></StartTime><FrequencyChanges><FrequencyChange><Frequency dt:dt="r8">10000000</Frequency><Timestamp dt:dt="r8">17122103608621</Timestamp><Current dt:…	59.959	1.0.0.17	1	-1928908105	2.0.10.182	10-21-2021	2021-10-21 10:44:39	18:44:39	2.0.10.92	1	affpro	WordList	1	1	1	77	f	NULL	NULL	4	NULL	NULL	NULL	NULL	NULL	NULL	NULL	NULL	NULL	NULL	NULL	NULL	NULL	NULL	NULL	NULL	pra2	taskList1	动物转基因	NULL	NULL	NULL	NULL	NULL	NULL	NULL
大创sc-iat	1	1	<?xml version="1.0"?>\n<Clock xmlns:dt="urn:schemas-microsoft-com:datatypes"><Description dt:dt="string">E-Prime Primary Realtime Clock</Description><StartTime><Timestamp dt:dt="int">0</Timestamp><DateUtc dt:dt="string">2021-10-21T10:44:38Z</DateUtc></StartTime><FrequencyChanges><FrequencyChange><Frequency dt:dt="r8">10000000</Frequency><Timestamp dt:dt="r8">17122103608621</Timestamp><Current dt:…	59.959	1.0.0.17	1	-1928908105	2.0.10.182	10-21-2021	2021-10-21 10:44:39	18:44:39	2.0.10.92	1	affpro	WordList	1	1	1	78	f	NULL	NULL	NULL	NULL	NULL	NULL	NULL	NULL	NULL	NULL	3	NULL	NULL	NULL	NULL	NULL	NULL	NULL	NULL	pra2	taskList1	高科技的	NULL	NULL	NULL	NULL	NULL	NULL	NULL
大创sc-iat	1	1	<?xml version="1.0"?>\n<Clock xmlns:dt="urn:schemas-microsoft-com:datatypes"><Description dt:dt="string">E-Prime Primary Realtime Clock</Description><StartTime><Timestamp dt:dt="int">0</Timestamp><DateUtc dt:dt="string">2021-10-21T10:44:38Z</DateUtc></StartTime><FrequencyChanges><FrequencyChange><Frequency dt:dt="r8">10000000</Frequency><Timestamp dt:dt="r8">17122103608621</Timestamp><Current dt:…	59.959	1.0.0.17	1	-1928908105	2.0.10.182	10-21-2021	2021-10-21 10:44:39	18:44:39	2.0.10.92	1	affpro	WordList	1	1	1	79	j	NULL	NULL	NULL	NULL	NULL	NULL	4	NULL	NULL	NULL	NULL	NULL	NULL	NULL	NULL	NULL	NULL	NULL	NULL	pra2	taskList1	有争议的	NULL	NULL	NULL	NULL	NULL	NULL	NULL
大创sc-iat	1	1	<?xml version="1.0"?>\n<Clock xmlns:dt="urn:schemas-microsoft-com:datatypes"><Description dt:dt="string">E-Prime Primary Realtime Clock</Description><StartTime><Timestamp dt:dt="int">0</Timestamp><DateUtc dt:dt="string">2021-10-21T10:44:38Z</DateUtc></StartTime><FrequencyChanges><FrequencyChange><Frequency dt:dt="r8">10000000</Frequency><Timestamp dt:dt="r8">17122103608621</Timestamp><Current dt:…	59.959	1.0.0.17	1	-1928908105	2.0.10.182	10-21-2021	2021-10-21 10:44:39	18:44:39	2.0.10.92	1	affpro	WordList	1	1	1	80	j	NULL	NULL	NULL	NULL	NULL	NULL	3	NULL	NULL	NULL	NULL	NULL	NULL	NULL	NULL	NULL	NULL	NULL	NULL	pra2	taskList1	非天然的	NULL	NULL	NULL	NULL	NULL	NULL	NULL
大创sc-iat	1	1	<?xml version="1.0"?>\n<Clock xmlns:dt="urn:schemas-microsoft-com:datatypes"><Description dt:dt="string">E-Prime Primary Realtime Clock</Description><StartTime><Timestamp dt:dt="int">0</Timestamp><DateUtc dt:dt="string">2021-10-21T10:44:38Z</DateUtc></StartTime><FrequencyChanges><FrequencyChange><Frequency dt:dt="r8">10000000</Frequency><Timestamp dt:dt="r8">17122103608621</Timestamp><Current dt:…	59.959	1.0.0.17	1	-1928908105	2.0.10.182	10-21-2021	2021-10-21 10:44:39	18:44:39	2.0.10.92	1	affpro	WordList	1	1	1	81	f	NULL	NULL	3	NULL	NULL	NULL	NULL	NULL	NULL	NULL	NULL	NULL	NULL	NULL	NULL	NULL	NULL	NULL	NULL	pra2	taskList1	转基因大豆	NULL	NULL	NULL	NULL	NULL	NULL	NULL
大创sc-iat	1	1	<?xml version="1.0"?>\n<Clock xmlns:dt="urn:schemas-microsoft-com:datatypes"><Description dt:dt="string">E-Prime Primary Realtime Clock</Description><StartTime><Timestamp dt:dt="int">0</Timestamp><DateUtc dt:dt="string">2021-10-21T10:44:38Z</DateUtc></StartTime><FrequencyChanges><FrequencyChange><Frequency dt:dt="r8">10000000</Frequency><Timestamp dt:dt="r8">17122103608621</Timestamp><Current dt:…	59.959	1.0.0.17	1	-1928908105	2.0.10.182	10-21-2021	2021-10-21 10:44:39	18:44:39	2.0.10.92	1	affpro	WordList	1	1	1	82	j	NULL	NULL	NULL	NULL	NULL	NULL	1	NULL	NULL	NULL	NULL	NULL	NULL	NULL	NULL	NULL	NULL	NULL	NULL	pra2	taskList1	不成熟的	NULL	NULL	NULL	NULL	NULL	NULL	NULL
大创sc-iat	1	1	<?xml version="1.0"?>\n<Clock xmlns:dt="urn:schemas-microsoft-com:datatypes"><Description dt:dt="string">E-Prime Primary Realtime Clock</Description><StartTime><Timestamp dt:dt="int">0</Timestamp><DateUtc dt:dt="string">2021-10-21T10:44:38Z</DateUtc></StartTime><FrequencyChanges><FrequencyChange><Frequency dt:dt="r8">10000000</Frequency><Timestamp dt:dt="r8">17122103608621</Timestamp><Current dt:…	59.959	1.0.0.17	1	-1928908105	2.0.10.182	10-21-2021	2021-10-21 10:44:39	18:44:39	2.0.10.92	1	affpro	WordList	1	1	1	83	f	NULL	NULL	NULL	NULL	NULL	NULL	NULL	NULL	NULL	NULL	1	NULL	NULL	NULL	NULL	NULL	NULL	NULL	NULL	pra2	taskList1	科学的	NULL	NULL	NULL	NULL	NULL	NULL	NULL
大创sc-iat	1	1	<?xml version="1.0"?>\n<Clock xmlns:dt="urn:schemas-microsoft-com:datatypes"><Description dt:dt="string">E-Prime Primary Realtime Clock</Description><StartTime><Timestamp dt:dt="int">0</Timestamp><DateUtc dt:dt="string">2021-10-21T10:44:38Z</DateUtc></StartTime><FrequencyChanges><FrequencyChange><Frequency dt:dt="r8">10000000</Frequency><Timestamp dt:dt="r8">17122103608621</Timestamp><Current dt:…	59.959	1.0.0.17	1	-1928908105	2.0.10.182	10-21-2021	2021-10-21 10:44:39	18:44:39	2.0.10.92	1	affpro	WordList	1	1	1	84	j	NULL	NULL	NULL	NULL	NULL	NULL	2	NULL	NULL	NULL	NULL	NULL	NULL	NULL	NULL	NULL	NULL	NULL	NULL	pra2	taskList1	高风险的	NULL	NULL	NULL	NULL	NULL	NULL	NULL
大创sc-iat	1	1	<?xml version="1.0"?>\n<Clock xmlns:dt="urn:schemas-microsoft-com:datatypes"><Description dt:dt="string">E-Prime Primary Realtime Clock</Description><StartTime><Timestamp dt:dt="int">0</Timestamp><DateUtc dt:dt="string">2021-10-21T10:44:38Z</DateUtc></StartTime><FrequencyChanges><FrequencyChange><Frequency dt:dt="r8">10000000</Frequency><Timestamp dt:dt="r8">17122103608621</Timestamp><Current dt:…	59.959	1.0.0.17	1	-1928908105	2.0.10.182	10-21-2021	2021-10-21 10:44:39	18:44:39	2.0.10.92	1	affpro	WordList	1	1	1	85	f	NULL	NULL	NULL	NULL	NULL	NULL	NULL	NULL	NULL	NULL	2	NULL	NULL	NULL	NULL	NULL	NULL	NULL	NULL	pra2	taskList1	高产的	NULL	NULL	NULL	NULL	NULL	NULL	NULL
大创sc-iat	1	1	<?xml version="1.0"?>\n<Clock xmlns:dt="urn:schemas-microsoft-com:datatypes"><Description dt:dt="string">E-Prime Primary Realtime Clock</Description><StartTime><Timestamp dt:dt="int">0</Timestamp><DateUtc dt:dt="string">2021-10-21T10:44:38Z</DateUtc></StartTime><FrequencyChanges><FrequencyChange><Frequency dt:dt="r8">10000000</Frequency><Timestamp dt:dt="r8">17122103608621</Timestamp><Current dt:…	59.959	1.0.0.17	1	-1928908105	2.0.10.182	10-21-2021	2021-10-21 10:44:39	18:44:39	2.0.10.92	1	affpro	WordList	1	1	1	86	f	NULL	NULL	2	NULL	NULL	NULL	NULL	NULL	NULL	NULL	NULL	NULL	NULL	NULL	NULL	NULL	NULL	NULL	NULL	pra2	taskList1	抗虫害棉花	NULL	NULL	NULL	NULL	NULL	NULL	NULL
大创sc-iat	1	1	<?xml version="1.0"?>\n<Clock xmlns:dt="urn:schemas-microsoft-com:datatypes"><Description dt:dt="string">E-Prime Primary Realtime Clock</Description><StartTime><Timestamp dt:dt="int">0</Timestamp><DateUtc dt:dt="string">2021-10-21T10:44:38Z</DateUtc></StartTime><FrequencyChanges><FrequencyChange><Frequency dt:dt="r8">10000000</Frequency><Timestamp dt:dt="r8">17122103608621</Timestamp><Current dt:…	59.959	1.0.0.17	1	-1928908105	2.0.10.182	10-21-2021	2021-10-21 10:44:39	18:44:39	2.0.10.92	1	affpro	WordList	1	1	1	87	j	NULL	NULL	NULL	NULL	NULL	NULL	3	NULL	NULL	NULL	NULL	NULL	NULL	NULL	NULL	NULL	NULL	NULL	NULL	pra2	taskList1	非天然的	NULL	NULL	NULL	NULL	NULL	NULL	NULL
大创sc-iat	1	1	<?xml version="1.0"?>\n<Clock xmlns:dt="urn:schemas-microsoft-com:datatypes"><Description dt:dt="string">E-Prime Primary Realtime Clock</Description><StartTime><Timestamp dt:dt="int">0</Timestamp><DateUtc dt:dt="string">2021-10-21T10:44:38Z</DateUtc></StartTime><FrequencyChanges><FrequencyChange><Frequency dt:dt="r8">10000000</Frequency><Timestamp dt:dt="r8">17122103608621</Timestamp><Current dt:…	59.959	1.0.0.17	1	-1928908105	2.0.10.182	10-21-2021	2021-10-21 10:44:39	18:44:39	2.0.10.92	1	affpro	WordList	1	1	1	88	j	NULL	NULL	NULL	NULL	NULL	NULL	4	NULL	NULL	NULL	NULL	NULL	NULL	NULL	NULL	NULL	NULL	NULL	NULL	pra2	taskList1	有争议的	NULL	NULL	NULL	NULL	NULL	NULL	NULL
大创sc-iat	1	1	<?xml version="1.0"?>\n<Clock xmlns:dt="urn:schemas-microsoft-com:datatypes"><Description dt:dt="string">E-Prime Primary Realtime Clock</Description><StartTime><Timestamp dt:dt="int">0</Timestamp><DateUtc dt:dt="string">2021-10-21T10:44:38Z</DateUtc></StartTime><FrequencyChanges><FrequencyChange><Frequency dt:dt="r8">10000000</Frequency><Timestamp dt:dt="r8">17122103608621</Timestamp><Current dt:…	59.959	1.0.0.17	1	-1928908105	2.0.10.182	10-21-2021	2021-10-21 10:44:39	18:44:39	2.0.10.92	1	affpro	WordList	1	1	1	89	f	NULL	NULL	1	NULL	NULL	NULL	NULL	NULL	NULL	NULL	NULL	NULL	NULL	NULL	NULL	NULL	NULL	NULL	NULL	pra2	taskList1	转基因食物	NULL	NULL	NULL	NULL	NULL	NULL	NULL
大创sc-iat	1	1	<?xml version="1.0"?>\n<Clock xmlns:dt="urn:schemas-microsoft-com:datatypes"><Description dt:dt="string">E-Prime Primary Realtime Clock</Description><StartTime><Timestamp dt:dt="int">0</Timestamp><DateUtc dt:dt="string">2021-10-21T10:44:38Z</DateUtc></StartTime><FrequencyChanges><FrequencyChange><Frequency dt:dt="r8">10000000</Frequency><Timestamp dt:dt="r8">17122103608621</Timestamp><Current dt:…	59.959	1.0.0.17	1	-1928908105	2.0.10.182	10-21-2021	2021-10-21 10:44:39	18:44:39	2.0.10.92	1	affpro	WordList	1	1	1	90	j	NULL	NULL	NULL	NULL	NULL	NULL	1	NULL	NULL	NULL	NULL	NULL	NULL	NULL	NULL	NULL	NULL	NULL	NULL	pra2	taskList1	不成熟的	NULL	NULL	NULL	NULL	NULL	NULL	NULL
大创sc-iat	1	1	<?xml version="1.0"?>\n<Clock xmlns:dt="urn:schemas-microsoft-com:datatypes"><Description dt:dt="string">E-Prime Primary Realtime Clock</Description><StartTime><Timestamp dt:dt="int">0</Timestamp><DateUtc dt:dt="string">2021-10-21T10:44:38Z</DateUtc></StartTime><FrequencyChanges><FrequencyChange><Frequency dt:dt="r8">10000000</Frequency><Timestamp dt:dt="r8">17122103608621</Timestamp><Current dt:…	59.959	1.0.0.17	1	-1928908105	2.0.10.182	10-21-2021	2021-10-21 10:44:39	18:44:39	2.0.10.92	1	affpro	WordList	1	1	1	91	j	NULL	NULL	NULL	NULL	NULL	NULL	4	NULL	NULL	NULL	NULL	NULL	NULL	NULL	NULL	NULL	NULL	NULL	NULL	pra2	taskList1	有争议的	NULL	NULL	NULL	NULL	NULL	NULL	NULL
大创sc-iat	1	1	<?xml version="1.0"?>\n<Clock xmlns:dt="urn:schemas-microsoft-com:datatypes"><Description dt:dt="string">E-Prime Primary Realtime Clock</Description><StartTime><Timestamp dt:dt="int">0</Timestamp><DateUtc dt:dt="string">2021-10-21T10:44:38Z</DateUtc></StartTime><FrequencyChanges><FrequencyChange><Frequency dt:dt="r8">10000000</Frequency><Timestamp dt:dt="r8">17122103608621</Timestamp><Current dt:…	59.959	1.0.0.17	1	-1928908105	2.0.10.182	10-21-2021	2021-10-21 10:44:39	18:44:39	2.0.10.92	1	affpro	WordList	1	1	1	92	f	NULL	NULL	NULL	NULL	NULL	NULL	NULL	NULL	NULL	NULL	1	NULL	NULL	NULL	NULL	NULL	NULL	NULL	NULL	pra2	taskList1	科学的	NULL	NULL	NULL	NULL	NULL	NULL	NULL
大创sc-iat	1	1	<?xml version="1.0"?>\n<Clock xmlns:dt="urn:schemas-microsoft-com:datatypes"><Description dt:dt="string">E-Prime Primary Realtime Clock</Description><StartTime><Timestamp dt:dt="int">0</Timestamp><DateUtc dt:dt="string">2021-10-21T10:44:38Z</DateUtc></StartTime><FrequencyChanges><FrequencyChange><Frequency dt:dt="r8">10000000</Frequency><Timestamp dt:dt="r8">17122103608621</Timestamp><Current dt:…	59.959	1.0.0.17	1	-1928908105	2.0.10.182	10-21-2021	2021-10-21 10:44:39	18:44:39	2.0.10.92	1	affpro	WordList	1	1	1	93	f	NULL	NULL	3	NULL	NULL	NULL	NULL	NULL	NULL	NULL	NULL	NULL	NULL	NULL	NULL	NULL	NULL	NULL	NULL	pra2	taskList1	转基因大豆	NULL	NULL	NULL	NULL	NULL	NULL	NULL
大创sc-iat	1	1	<?xml version="1.0"?>\n<Clock xmlns:dt="urn:schemas-microsoft-com:datatypes"><Description dt:dt="string">E-Prime Primary Realtime Clock</Description><StartTime><Timestamp dt:dt="int">0</Timestamp><DateUtc dt:dt="string">2021-10-21T10:44:38Z</DateUtc></StartTime><FrequencyChanges><FrequencyChange><Frequency dt:dt="r8">10000000</Frequency><Timestamp dt:dt="r8">17122103608621</Timestamp><Current dt:…	59.959	1.0.0.17	1	-1928908105	2.0.10.182	10-21-2021	2021-10-21 10:44:39	18:44:39	2.0.10.92	1	affpro	WordList	1	1	1	94	j	NULL	NULL	NULL	NULL	NULL	NULL	2	NULL	NULL	NULL	NULL	NULL	NULL	NULL	NULL	NULL	NULL	NULL	NULL	pra2	taskList1	高风险的	NULL	NULL	NULL	NULL	NULL	NULL	NULL
大创sc-iat	1	1	<?xml version="1.0"?>\n<Clock xmlns:dt="urn:schemas-microsoft-com:datatypes"><Description dt:dt="string">E-Prime Primary Realtime Clock</Description><StartTime><Timestamp dt:dt="int">0</Timestamp><DateUtc dt:dt="string">2021-10-21T10:44:38Z</DateUtc></StartTime><FrequencyChanges><FrequencyChange><Frequency dt:dt="r8">10000000</Frequency><Timestamp dt:dt="r8">17122103608621</Timestamp><Current dt:…	59.959	1.0.0.17	1	-1928908105	2.0.10.182	10-21-2021	2021-10-21 10:44:39	18:44:39	2.0.10.92	1	affpro	WordList	1	1	1	95	f	NULL	NULL	NULL	NULL	NULL	NULL	NULL	NULL	NULL	NULL	2	NULL	NULL	NULL	NULL	NULL	NULL	NULL	NULL	pra2	taskList1	高产的	NULL	NULL	NULL	NULL	NULL	NULL	NULL
大创sc-iat	1	1	<?xml version="1.0"?>\n<Clock xmlns:dt="urn:schemas-microsoft-com:datatypes"><Description dt:dt="string">E-Prime Primary Realtime Clock</Description><StartTime><Timestamp dt:dt="int">0</Timestamp><DateUtc dt:dt="string">2021-10-21T10:44:38Z</DateUtc></StartTime><FrequencyChanges><FrequencyChange><Frequency dt:dt="r8">10000000</Frequency><Timestamp dt:dt="r8">17122103608621</Timestamp><Current dt:…	59.959	1.0.0.17	1	-1928908105	2.0.10.182	10-21-2021	2021-10-21 10:44:39	18:44:39	2.0.10.92	1	affpro	WordList	1	1	1	96	j	NULL	NULL	NULL	NULL	NULL	NULL	3	NULL	NULL	NULL	NULL	NULL	NULL	NULL	NULL	NULL	NULL	NULL	NULL	pra2	taskList1	非天然的	NULL	NULL	NULL	NULL	NULL	NULL	NULL
大创sc-iat	1	1	<?xml version="1.0"?>\n<Clock xmlns:dt="urn:schemas-microsoft-com:datatypes"><Description dt:dt="string">E-Prime Primary Realtime Clock</Description><StartTime><Timestamp dt:dt="int">0</Timestamp><DateUtc dt:dt="string">2021-10-21T10:44:38Z</DateUtc></StartTime><FrequencyChanges><FrequencyChange><Frequency dt:dt="r8">10000000</Frequency><Timestamp dt:dt="r8">17122103608621</Timestamp><Current dt:…	59.959	1.0.0.17	1	-1928908105	2.0.10.182	10-21-2021	2021-10-21 10:44:39	18:44:39	2.0.10.92	1	affpro	WordList	1	1	1	97	j	NULL	NULL	NULL	2	NULL	NULL	NULL	NULL	NULL	NULL	NULL	NULL	NULL	NULL	NULL	NULL	1	1	1	pra3	practiceList2	抗虫害棉花	NULL	NULL	NULL	NULL	NULL	NULL	NULL
大创sc-iat	1	1	<?xml version="1.0"?>\n<Clock xmlns:dt="urn:schemas-microsoft-com:datatypes"><Description dt:dt="string">E-Prime Primary Realtime Clock</Description><StartTime><Timestamp dt:dt="int">0</Timestamp><DateUtc dt:dt="string">2021-10-21T10:44:38Z</DateUtc></StartTime><FrequencyChanges><FrequencyChange><Frequency dt:dt="r8">10000000</Frequency><Timestamp dt:dt="r8">17122103608621</Timestamp><Current dt:…	59.959	1.0.0.17	1	-1928908105	2.0.10.182	10-21-2021	2021-10-21 10:44:39	18:44:39	2.0.10.92	1	affpro	WordList	1	1	1	98	j	NULL	NULL	NULL	NULL	NULL	NULL	NULL	1	NULL	NULL	NULL	NULL	NULL	NULL	NULL	NULL	3	1	2	pra3	practiceList2	不成熟的	NULL	NULL	NULL	NULL	NULL	NULL	NULL
大创sc-iat	1	1	<?xml version="1.0"?>\n<Clock xmlns:dt="urn:schemas-microsoft-com:datatypes"><Description dt:dt="string">E-Prime Primary Realtime Clock</Description><StartTime><Timestamp dt:dt="int">0</Timestamp><DateUtc dt:dt="string">2021-10-21T10:44:38Z</DateUtc></StartTime><FrequencyChanges><FrequencyChange><Frequency dt:dt="r8">10000000</Frequency><Timestamp dt:dt="r8">17122103608621</Timestamp><Current dt:…	59.959	1.0.0.17	1	-1928908105	2.0.10.182	10-21-2021	2021-10-21 10:44:39	18:44:39	2.0.10.92	1	affpro	WordList	1	1	1	99	f	NULL	NULL	NULL	NULL	NULL	NULL	NULL	NULL	NULL	NULL	NULL	1	NULL	NULL	NULL	NULL	2	1	3	pra3	practiceList2	科学的	NULL	NULL	NULL	NULL	NULL	NULL	NULL
大创sc-iat	1	1	<?xml version="1.0"?>\n<Clock xmlns:dt="urn:schemas-microsoft-com:datatypes"><Description dt:dt="string">E-Prime Primary Realtime Clock</Description><StartTime><Timestamp dt:dt="int">0</Timestamp><DateUtc dt:dt="string">2021-10-21T10:44:38Z</DateUtc></StartTime><FrequencyChanges><FrequencyChange><Frequency dt:dt="r8">10000000</Frequency><Timestamp dt:dt="r8">17122103608621</Timestamp><Current dt:…	59.959	1.0.0.17	1	-1928908105	2.0.10.182	10-21-2021	2021-10-21 10:44:39	18:44:39	2.0.10.92	1	affpro	WordList	1	1	1	100	f	NULL	NULL	NULL	NULL	NULL	NULL	NULL	NULL	NULL	NULL	NULL	2	NULL	NULL	NULL	NULL	2	1	4	pra3	practiceList2	高产的	NULL	NULL	NULL	NULL	NULL	NULL	NULL
大创sc-iat	1	1	<?xml version="1.0"?>\n<Clock xmlns:dt="urn:schemas-microsoft-com:datatypes"><Description dt:dt="string">E-Prime Primary Realtime Clock</Description><StartTime><Timestamp dt:dt="int">0</Timestamp><DateUtc dt:dt="string">2021-10-21T10:44:38Z</DateUtc></StartTime><FrequencyChanges><FrequencyChange><Frequency dt:dt="r8">10000000</Frequency><Timestamp dt:dt="r8">17122103608621</Timestamp><Current dt:…	59.959	1.0.0.17	1	-1928908105	2.0.10.182	10-21-2021	2021-10-21 10:44:39	18:44:39	2.0.10.92	1	affpro	WordList	1	1	1	101	j	NULL	NULL	NULL	NULL	NULL	NULL	NULL	4	NULL	NULL	NULL	NULL	NULL	NULL	NULL	NULL	3	2	5	pra3	practiceList2	有争议的	NULL	NULL	NULL	NULL	NULL	NULL	NULL
大创sc-iat	1	1	<?xml version="1.0"?>\n<Clock xmlns:dt="urn:schemas-microsoft-com:datatypes"><Description dt:dt="string">E-Prime Primary Realtime Clock</Description><StartTime><Timestamp dt:dt="int">0</Timestamp><DateUtc dt:dt="string">2021-10-21T10:44:38Z</DateUtc></StartTime><FrequencyChanges><FrequencyChange><Frequency dt:dt="r8">10000000</Frequency><Timestamp dt:dt="r8">17122103608621</Timestamp><Current dt:…	59.959	1.0.0.17	1	-1928908105	2.0.10.182	10-21-2021	2021-10-21 10:44:39	18:44:39	2.0.10.92	1	affpro	WordList	1	1	1	102	f	NULL	NULL	NULL	NULL	NULL	NULL	NULL	NULL	NULL	NULL	NULL	3	NULL	NULL	NULL	NULL	2	2	6	pra3	practiceList2	高科技的	NULL	NULL	NULL	NULL	NULL	NULL	NULL
大创sc-iat	1	1	<?xml version="1.0"?>\n<Clock xmlns:dt="urn:schemas-microsoft-com:datatypes"><Description dt:dt="string">E-Prime Primary Realtime Clock</Description><StartTime><Timestamp dt:dt="int">0</Timestamp><DateUtc dt:dt="string">2021-10-21T10:44:38Z</DateUtc></StartTime><FrequencyChanges><FrequencyChange><Frequency dt:dt="r8">10000000</Frequency><Timestamp dt:dt="r8">17122103608621</Timestamp><Current dt:…	59.959	1.0.0.17	1	-1928908105	2.0.10.182	10-21-2021	2021-10-21 10:44:39	18:44:39	2.0.10.92	1	affpro	WordList	1	1	1	103	j	NULL	NULL	NULL	4	NULL	NULL	NULL	NULL	NULL	NULL	NULL	NULL	NULL	NULL	NULL	NULL	1	2	7	pra3	practiceList2	动物转基因	NULL	NULL	NULL	NULL	NULL	NULL	NULL
大创sc-iat	1	1	<?xml version="1.0"?>\n<Clock xmlns:dt="urn:schemas-microsoft-com:datatypes"><Description dt:dt="string">E-Prime Primary Realtime Clock</Description><StartTime><Timestamp dt:dt="int">0</Timestamp><DateUtc dt:dt="string">2021-10-21T10:44:38Z</DateUtc></StartTime><FrequencyChanges><FrequencyChange><Frequency dt:dt="r8">10000000</Frequency><Timestamp dt:dt="r8">17122103608621</Timestamp><Current dt:…	59.959	1.0.0.17	1	-1928908105	2.0.10.182	10-21-2021	2021-10-21 10:44:39	18:44:39	2.0.10.92	1	affpro	WordList	1	1	1	104	f	NULL	NULL	NULL	NULL	NULL	NULL	NULL	NULL	NULL	NULL	NULL	4	NULL	NULL	NULL	NULL	2	2	8	pra3	practiceList2	创新的	NULL	NULL	NULL	NULL	NULL	NULL	NULL
大创sc-iat	1	1	<?xml version="1.0"?>\n<Clock xmlns:dt="urn:schemas-microsoft-com:datatypes"><Description dt:dt="string">E-Prime Primary Realtime Clock</Description><StartTime><Timestamp dt:dt="int">0</Timestamp><DateUtc dt:dt="string">2021-10-21T10:44:38Z</DateUtc></StartTime><FrequencyChanges><FrequencyChange><Frequency dt:dt="r8">10000000</Frequency><Timestamp dt:dt="r8">17122103608621</Timestamp><Current dt:…	59.959	1.0.0.17	1	-1928908105	2.0.10.182	10-21-2021	2021-10-21 10:44:39	18:44:39	2.0.10.92	1	affpro	WordList	1	1	1	105	j	NULL	NULL	NULL	1	NULL	NULL	NULL	NULL	NULL	NULL	NULL	NULL	NULL	NULL	NULL	NULL	1	3	9	pra3	practiceList2	转基因食物	NULL	NULL	NULL	NULL	NULL	NULL	NULL
大创sc-iat	1	1	<?xml version="1.0"?>\n<Clock xmlns:dt="urn:schemas-microsoft-com:datatypes"><Description dt:dt="string">E-Prime Primary Realtime Clock</Description><StartTime><Timestamp dt:dt="int">0</Timestamp><DateUtc dt:dt="string">2021-10-21T10:44:38Z</DateUtc></StartTime><FrequencyChanges><FrequencyChange><Frequency dt:dt="r8">10000000</Frequency><Timestamp dt:dt="r8">17122103608621</Timestamp><Current dt:…	59.959	1.0.0.17	1	-1928908105	2.0.10.182	10-21-2021	2021-10-21 10:44:39	18:44:39	2.0.10.92	1	affpro	WordList	1	1	1	106	f	NULL	NULL	NULL	NULL	NULL	NULL	NULL	NULL	NULL	NULL	NULL	3	NULL	NULL	NULL	NULL	2	3	10	pra3	practiceList2	高科技的	NULL	NULL	NULL	NULL	NULL	NULL	NULL
大创sc-iat	1	1	<?xml version="1.0"?>\n<Clock xmlns:dt="urn:schemas-microsoft-com:datatypes"><Description dt:dt="string">E-Prime Primary Realtime Clock</Description><StartTime><Timestamp dt:dt="int">0</Timestamp><DateUtc dt:dt="string">2021-10-21T10:44:38Z</DateUtc></StartTime><FrequencyChanges><FrequencyChange><Frequency dt:dt="r8">10000000</Frequency><Timestamp dt:dt="r8">17122103608621</Timestamp><Current dt:…	59.959	1.0.0.17	1	-1928908105	2.0.10.182	10-21-2021	2021-10-21 10:44:39	18:44:39	2.0.10.92	1	affpro	WordList	1	1	1	107	f	NULL	NULL	NULL	NULL	NULL	NULL	NULL	NULL	NULL	NULL	NULL	1	NULL	NULL	NULL	NULL	2	3	11	pra3	practiceList2	科学的	NULL	NULL	NULL	NULL	NULL	NULL	NULL
大创sc-iat	1	1	<?xml version="1.0"?>\n<Clock xmlns:dt="urn:schemas-microsoft-com:datatypes"><Description dt:dt="string">E-Prime Primary Realtime Clock</Description><StartTime><Timestamp dt:dt="int">0</Timestamp><DateUtc dt:dt="string">2021-10-21T10:44:38Z</DateUtc></StartTime><FrequencyChanges><FrequencyChange><Frequency dt:dt="r8">10000000</Frequency><Timestamp dt:dt="r8">17122103608621</Timestamp><Current dt:…	59.959	1.0.0.17	1	-1928908105	2.0.10.182	10-21-2021	2021-10-21 10:44:39	18:44:39	2.0.10.92	1	affpro	WordList	1	1	1	108	j	NULL	NULL	NULL	NULL	NULL	NULL	NULL	2	NULL	NULL	NULL	NULL	NULL	NULL	NULL	NULL	3	3	12	pra3	practiceList2	高风险的	NULL	NULL	NULL	NULL	NULL	NULL	NULL
大创sc-iat	1	1	<?xml version="1.0"?>\n<Clock xmlns:dt="urn:schemas-microsoft-com:datatypes"><Description dt:dt="string">E-Prime Primary Realtime Clock</Description><StartTime><Timestamp dt:dt="int">0</Timestamp><DateUtc dt:dt="string">2021-10-21T10:44:38Z</DateUtc></StartTime><FrequencyChanges><FrequencyChange><Frequency dt:dt="r8">10000000</Frequency><Timestamp dt:dt="r8">17122103608621</Timestamp><Current dt:…	59.959	1.0.0.17	1	-1928908105	2.0.10.182	10-21-2021	2021-10-21 10:44:39	18:44:39	2.0.10.92	1	affpro	WordList	1	1	1	109	f	NULL	NULL	NULL	NULL	NULL	NULL	NULL	NULL	NULL	NULL	NULL	4	NULL	NULL	NULL	NULL	2	4	13	pra3	practiceList2	创新的	NULL	NULL	NULL	NULL	NULL	NULL	NULL
大创sc-iat	1	1	<?xml version="1.0"?>\n<Clock xmlns:dt="urn:schemas-microsoft-com:datatypes"><Description dt:dt="string">E-Prime Primary Realtime Clock</Description><StartTime><Timestamp dt:dt="int">0</Timestamp><DateUtc dt:dt="string">2021-10-21T10:44:38Z</DateUtc></StartTime><FrequencyChanges><FrequencyChange><Frequency dt:dt="r8">10000000</Frequency><Timestamp dt:dt="r8">17122103608621</Timestamp><Current dt:…	59.959	1.0.0.17	1	-1928908105	2.0.10.182	10-21-2021	2021-10-21 10:44:39	18:44:39	2.0.10.92	1	affpro	WordList	1	1	1	110	j	NULL	NULL	NULL	NULL	NULL	NULL	NULL	3	NULL	NULL	NULL	NULL	NULL	NULL	NULL	NULL	3	4	14	pra3	practiceList2	非天然的	NULL	NULL	NULL	NULL	NULL	NULL	NULL
大创sc-iat	1	1	<?xml version="1.0"?>\n<Clock xmlns:dt="urn:schemas-microsoft-com:datatypes"><Description dt:dt="string">E-Prime Primary Realtime Clock</Description><StartTime><Timestamp dt:dt="int">0</Timestamp><DateUtc dt:dt="string">2021-10-21T10:44:38Z</DateUtc></StartTime><FrequencyChanges><FrequencyChange><Frequency dt:dt="r8">10000000</Frequency><Timestamp dt:dt="r8">17122103608621</Timestamp><Current dt:…	59.959	1.0.0.17	1	-1928908105	2.0.10.182	10-21-2021	2021-10-21 10:44:39	18:44:39	2.0.10.92	1	affpro	WordList	1	1	1	111	f	NULL	NULL	NULL	NULL	NULL	NULL	NULL	NULL	NULL	NULL	NULL	2	NULL	NULL	NULL	NULL	2	4	15	pra3	practiceList2	高产的	NULL	NULL	NULL	NULL	NULL	NULL	NULL
大创sc-iat	1	1	<?xml version="1.0"?>\n<Clock xmlns:dt="urn:schemas-microsoft-com:datatypes"><Description dt:dt="string">E-Prime Primary Realtime Clock</Description><StartTime><Timestamp dt:dt="int">0</Timestamp><DateUtc dt:dt="string">2021-10-21T10:44:38Z</DateUtc></StartTime><FrequencyChanges><FrequencyChange><Frequency dt:dt="r8">10000000</Frequency><Timestamp dt:dt="r8">17122103608621</Timestamp><Current dt:…	59.959	1.0.0.17	1	-1928908105	2.0.10.182	10-21-2021	2021-10-21 10:44:39	18:44:39	2.0.10.92	1	affpro	WordList	1	1	1	112	j	NULL	NULL	NULL	3	NULL	NULL	NULL	NULL	NULL	NULL	NULL	NULL	NULL	NULL	NULL	NULL	1	4	16	pra3	practiceList2	转基因大豆	NULL	NULL	NULL	NULL	NULL	NULL	NULL
大创sc-iat	1	1	<?xml version="1.0"?>\n<Clock xmlns:dt="urn:schemas-microsoft-com:datatypes"><Description dt:dt="string">E-Prime Primary Realtime Clock</Description><StartTime><Timestamp dt:dt="int">0</Timestamp><DateUtc dt:dt="string">2021-10-21T10:44:38Z</DateUtc></StartTime><FrequencyChanges><FrequencyChange><Frequency dt:dt="r8">10000000</Frequency><Timestamp dt:dt="r8">17122103608621</Timestamp><Current dt:…	59.959	1.0.0.17	1	-1928908105	2.0.10.182	10-21-2021	2021-10-21 10:44:39	18:44:39	2.0.10.92	1	affpro	WordList	1	1	1	113	f	NULL	NULL	NULL	NULL	NULL	NULL	NULL	NULL	NULL	NULL	NULL	3	NULL	NULL	NULL	NULL	2	5	17	pra3	practiceList2	高科技的	NULL	NULL	NULL	NULL	NULL	NULL	NULL
大创sc-iat	1	1	<?xml version="1.0"?>\n<Clock xmlns:dt="urn:schemas-microsoft-com:datatypes"><Description dt:dt="string">E-Prime Primary Realtime Clock</Description><StartTime><Timestamp dt:dt="int">0</Timestamp><DateUtc dt:dt="string">2021-10-21T10:44:38Z</DateUtc></StartTime><FrequencyChanges><FrequencyChange><Frequency dt:dt="r8">10000000</Frequency><Timestamp dt:dt="r8">17122103608621</Timestamp><Current dt:…	59.959	1.0.0.17	1	-1928908105	2.0.10.182	10-21-2021	2021-10-21 10:44:39	18:44:39	2.0.10.92	1	affpro	WordList	1	1	1	114	f	NULL	NULL	NULL	NULL	NULL	NULL	NULL	NULL	NULL	NULL	NULL	1	NULL	NULL	NULL	NULL	2	5	18	pra3	practiceList2	科学的	NULL	NULL	NULL	NULL	NULL	NULL	NULL
大创sc-iat	1	1	<?xml version="1.0"?>\n<Clock xmlns:dt="urn:schemas-microsoft-com:datatypes"><Description dt:dt="string">E-Prime Primary Realtime Clock</Description><StartTime><Timestamp dt:dt="int">0</Timestamp><DateUtc dt:dt="string">2021-10-21T10:44:38Z</DateUtc></StartTime><FrequencyChanges><FrequencyChange><Frequency dt:dt="r8">10000000</Frequency><Timestamp dt:dt="r8">17122103608621</Timestamp><Current dt:…	59.959	1.0.0.17	1	-1928908105	2.0.10.182	10-21-2021	2021-10-21 10:44:39	18:44:39	2.0.10.92	1	affpro	WordList	1	1	1	115	j	NULL	NULL	NULL	NULL	NULL	NULL	NULL	1	NULL	NULL	NULL	NULL	NULL	NULL	NULL	NULL	3	5	19	pra3	practiceList2	不成熟的	NULL	NULL	NULL	NULL	NULL	NULL	NULL
大创sc-iat	1	1	<?xml version="1.0"?>\n<Clock xmlns:dt="urn:schemas-microsoft-com:datatypes"><Description dt:dt="string">E-Prime Primary Realtime Clock</Description><StartTime><Timestamp dt:dt="int">0</Timestamp><DateUtc dt:dt="string">2021-10-21T10:44:38Z</DateUtc></StartTime><FrequencyChanges><FrequencyChange><Frequency dt:dt="r8">10000000</Frequency><Timestamp dt:dt="r8">17122103608621</Timestamp><Current dt:…	59.959	1.0.0.17	1	-1928908105	2.0.10.182	10-21-2021	2021-10-21 10:44:39	18:44:39	2.0.10.92	1	affpro	WordList	1	1	1	116	j	NULL	NULL	NULL	2	NULL	NULL	NULL	NULL	NULL	NULL	NULL	NULL	NULL	NULL	NULL	NULL	1	5	20	pra3	practiceList2	抗虫害棉花	NULL	NULL	NULL	NULL	NULL	NULL	NULL
大创sc-iat	1	1	<?xml version="1.0"?>\n<Clock xmlns:dt="urn:schemas-microsoft-com:datatypes"><Description dt:dt="string">E-Prime Primary Realtime Clock</Description><StartTime><Timestamp dt:dt="int">0</Timestamp><DateUtc dt:dt="string">2021-10-21T10:44:38Z</DateUtc></StartTime><FrequencyChanges><FrequencyChange><Frequency dt:dt="r8">10000000</Frequency><Timestamp dt:dt="r8">17122103608621</Timestamp><Current dt:…	59.959	1.0.0.17	1	-1928908105	2.0.10.182	10-21-2021	2021-10-21 10:44:39	18:44:39	2.0.10.92	1	affpro	WordList	1	1	1	117	f	NULL	NULL	NULL	NULL	NULL	NULL	NULL	NULL	NULL	NULL	NULL	2	NULL	NULL	NULL	NULL	2	6	21	pra3	practiceList2	高产的	NULL	NULL	NULL	NULL	NULL	NULL	NULL
大创sc-iat	1	1	<?xml version="1.0"?>\n<Clock xmlns:dt="urn:schemas-microsoft-com:datatypes"><Description dt:dt="string">E-Prime Primary Realtime Clock</Description><StartTime><Timestamp dt:dt="int">0</Timestamp><DateUtc dt:dt="string">2021-10-21T10:44:38Z</DateUtc></StartTime><FrequencyChanges><FrequencyChange><Frequency dt:dt="r8">10000000</Frequency><Timestamp dt:dt="r8">17122103608621</Timestamp><Current dt:…	59.959	1.0.0.17	1	-1928908105	2.0.10.182	10-21-2021	2021-10-21 10:44:39	18:44:39	2.0.10.92	1	affpro	WordList	1	1	1	118	f	NULL	NULL	NULL	NULL	NULL	NULL	NULL	NULL	NULL	NULL	NULL	4	NULL	NULL	NULL	NULL	2	6	22	pra3	practiceList2	创新的	NULL	NULL	NULL	NULL	NULL	NULL	NULL
大创sc-iat	1	1	<?xml version="1.0"?>\n<Clock xmlns:dt="urn:schemas-microsoft-com:datatypes"><Description dt:dt="string">E-Prime Primary Realtime Clock</Description><StartTime><Timestamp dt:dt="int">0</Timestamp><DateUtc dt:dt="string">2021-10-21T10:44:38Z</DateUtc></StartTime><FrequencyChanges><FrequencyChange><Frequency dt:dt="r8">10000000</Frequency><Timestamp dt:dt="r8">17122103608621</Timestamp><Current dt:…	59.959	1.0.0.17	1	-1928908105	2.0.10.182	10-21-2021	2021-10-21 10:44:39	18:44:39	2.0.10.92	1	affpro	WordList	1	1	1	119	j	NULL	NULL	NULL	NULL	NULL	NULL	NULL	4	NULL	NULL	NULL	NULL	NULL	NULL	NULL	NULL	3	6	23	pra3	practiceList2	有争议的	NULL	NULL	NULL	NULL	NULL	NULL	NULL
大创sc-iat	1	1	<?xml version="1.0"?>\n<Clock xmlns:dt="urn:schemas-microsoft-com:datatypes"><Description dt:dt="string">E-Prime Primary Realtime Clock</Description><StartTime><Timestamp dt:dt="int">0</Timestamp><DateUtc dt:dt="string">2021-10-21T10:44:38Z</DateUtc></StartTime><FrequencyChanges><FrequencyChange><Frequency dt:dt="r8">10000000</Frequency><Timestamp dt:dt="r8">17122103608621</Timestamp><Current dt:…	59.959	1.0.0.17	1	-1928908105	2.0.10.182	10-21-2021	2021-10-21 10:44:39	18:44:39	2.0.10.92	1	affpro	WordList	1	1	1	120	j	NULL	NULL	NULL	3	NULL	NULL	NULL	NULL	NULL	NULL	NULL	NULL	NULL	NULL	NULL	NULL	1	6	24	pra3	practiceList2	转基因大豆	NULL	NULL	NULL	NULL	NULL	NULL	NULL
大创sc-iat	1	1	<?xml version="1.0"?>\n<Clock xmlns:dt="urn:schemas-microsoft-com:datatypes"><Description dt:dt="string">E-Prime Primary Realtime Clock</Description><StartTime><Timestamp dt:dt="int">0</Timestamp><DateUtc dt:dt="string">2021-10-21T10:44:38Z</DateUtc></StartTime><FrequencyChanges><FrequencyChange><Frequency dt:dt="r8">10000000</Frequency><Timestamp dt:dt="r8">17122103608621</Timestamp><Current dt:…	59.959	1.0.0.17	1	-1928908105	2.0.10.182	10-21-2021	2021-10-21 10:44:39	18:44:39	2.0.10.92	1	affpro	WordList	1	1	1	121	j	NULL	NULL	NULL	NULL	NULL	NULL	NULL	NULL	1	NULL	NULL	NULL	NULL	NULL	NULL	NULL	NULL	NULL	NULL	pra4	taskList2	不成熟的	NULL	NULL	NULL	NULL	NULL	NULL	NULL
大创sc-iat	1	1	<?xml version="1.0"?>\n<Clock xmlns:dt="urn:schemas-microsoft-com:datatypes"><Description dt:dt="string">E-Prime Primary Realtime Clock</Description><StartTime><Timestamp dt:dt="int">0</Timestamp><DateUtc dt:dt="string">2021-10-21T10:44:38Z</DateUtc></StartTime><FrequencyChanges><FrequencyChange><Frequency dt:dt="r8">10000000</Frequency><Timestamp dt:dt="r8">17122103608621</Timestamp><Current dt:…	59.959	1.0.0.17	1	-1928908105	2.0.10.182	10-21-2021	2021-10-21 10:44:39	18:44:39	2.0.10.92	1	affpro	WordList	1	1	1	122	f	NULL	NULL	NULL	NULL	NULL	NULL	NULL	NULL	NULL	NULL	NULL	NULL	2	NULL	NULL	NULL	NULL	NULL	NULL	pra4	taskList2	高产的	NULL	NULL	NULL	NULL	NULL	NULL	NULL
大创sc-iat	1	1	<?xml version="1.0"?>\n<Clock xmlns:dt="urn:schemas-microsoft-com:datatypes"><Description dt:dt="string">E-Prime Primary Realtime Clock</Description><StartTime><Timestamp dt:dt="int">0</Timestamp><DateUtc dt:dt="string">2021-10-21T10:44:38Z</DateUtc></StartTime><FrequencyChanges><FrequencyChange><Frequency dt:dt="r8">10000000</Frequency><Timestamp dt:dt="r8">17122103608621</Timestamp><Current dt:…	59.959	1.0.0.17	1	-1928908105	2.0.10.182	10-21-2021	2021-10-21 10:44:39	18:44:39	2.0.10.92	1	affpro	WordList	1	1	1	123	f	NULL	NULL	NULL	NULL	NULL	NULL	NULL	NULL	NULL	NULL	NULL	NULL	1	NULL	NULL	NULL	NULL	NULL	NULL	pra4	taskList2	科学的	NULL	NULL	NULL	NULL	NULL	NULL	NULL
大创sc-iat	1	1	<?xml version="1.0"?>\n<Clock xmlns:dt="urn:schemas-microsoft-com:datatypes"><Description dt:dt="string">E-Prime Primary Realtime Clock</Description><StartTime><Timestamp dt:dt="int">0</Timestamp><DateUtc dt:dt="string">2021-10-21T10:44:38Z</DateUtc></StartTime><FrequencyChanges><FrequencyChange><Frequency dt:dt="r8">10000000</Frequency><Timestamp dt:dt="r8">17122103608621</Timestamp><Current dt:…	59.959	1.0.0.17	1	-1928908105	2.0.10.182	10-21-2021	2021-10-21 10:44:39	18:44:39	2.0.10.92	1	affpro	WordList	1	1	1	124	j	NULL	NULL	NULL	NULL	3	NULL	NULL	NULL	NULL	NULL	NULL	NULL	NULL	NULL	NULL	NULL	NULL	NULL	NULL	pra4	taskList2	转基因大豆	NULL	NULL	NULL	NULL	NULL	NULL	NULL
大创sc-iat	1	1	<?xml version="1.0"?>\n<Clock xmlns:dt="urn:schemas-microsoft-com:datatypes"><Description dt:dt="string">E-Prime Primary Realtime Clock</Description><StartTime><Timestamp dt:dt="int">0</Timestamp><DateUtc dt:dt="string">2021-10-21T10:44:38Z</DateUtc></StartTime><FrequencyChanges><FrequencyChange><Frequency dt:dt="r8">10000000</Frequency><Timestamp dt:dt="r8">17122103608621</Timestamp><Current dt:…	59.959	1.0.0.17	1	-1928908105	2.0.10.182	10-21-2021	2021-10-21 10:44:39	18:44:39	2.0.10.92	1	affpro	WordList	1	1	1	125	j	NULL	NULL	NULL	NULL	NULL	NULL	NULL	NULL	3	NULL	NULL	NULL	NULL	NULL	NULL	NULL	NULL	NULL	NULL	pra4	taskList2	非天然的	NULL	NULL	NULL	NULL	NULL	NULL	NULL
大创sc-iat	1	1	<?xml version="1.0"?>\n<Clock xmlns:dt="urn:schemas-microsoft-com:datatypes"><Description dt:dt="string">E-Prime Primary Realtime Clock</Description><StartTime><Timestamp dt:dt="int">0</Timestamp><DateUtc dt:dt="string">2021-10-21T10:44:38Z</DateUtc></StartTime><FrequencyChanges><FrequencyChange><Frequency dt:dt="r8">10000000</Frequency><Timestamp dt:dt="r8">17122103608621</Timestamp><Current dt:…	59.959	1.0.0.17	1	-1928908105	2.0.10.182	10-21-2021	2021-10-21 10:44:39	18:44:39	2.0.10.92	1	affpro	WordList	1	1	1	126	f	NULL	NULL	NULL	NULL	NULL	NULL	NULL	NULL	NULL	NULL	NULL	NULL	3	NULL	NULL	NULL	NULL	NULL	NULL	pra4	taskList2	高科技的	NULL	NULL	NULL	NULL	NULL	NULL	NULL
大创sc-iat	1	1	<?xml version="1.0"?>\n<Clock xmlns:dt="urn:schemas-microsoft-com:datatypes"><Description dt:dt="string">E-Prime Primary Realtime Clock</Description><StartTime><Timestamp dt:dt="int">0</Timestamp><DateUtc dt:dt="string">2021-10-21T10:44:38Z</DateUtc></StartTime><FrequencyChanges><FrequencyChange><Frequency dt:dt="r8">10000000</Frequency><Timestamp dt:dt="r8">17122103608621</Timestamp><Current dt:…	59.959	1.0.0.17	1	-1928908105	2.0.10.182	10-21-2021	2021-10-21 10:44:39	18:44:39	2.0.10.92	1	affpro	WordList	1	1	1	127	f	NULL	NULL	NULL	NULL	NULL	NULL	NULL	NULL	NULL	NULL	NULL	NULL	4	NULL	NULL	NULL	NULL	NULL	NULL	pra4	taskList2	创新的	NULL	NULL	NULL	NULL	NULL	NULL	NULL
大创sc-iat	1	1	<?xml version="1.0"?>\n<Clock xmlns:dt="urn:schemas-microsoft-com:datatypes"><Description dt:dt="string">E-Prime Primary Realtime Clock</Description><StartTime><Timestamp dt:dt="int">0</Timestamp><DateUtc dt:dt="string">2021-10-21T10:44:38Z</DateUtc></StartTime><FrequencyChanges><FrequencyChange><Frequency dt:dt="r8">10000000</Frequency><Timestamp dt:dt="r8">17122103608621</Timestamp><Current dt:…	59.959	1.0.0.17	1	-1928908105	2.0.10.182	10-21-2021	2021-10-21 10:44:39	18:44:39	2.0.10.92	1	affpro	WordList	1	1	1	128	j	NULL	NULL	NULL	NULL	2	NULL	NULL	NULL	NULL	NULL	NULL	NULL	NULL	NULL	NULL	NULL	NULL	NULL	NULL	pra4	taskList2	抗虫害棉花	NULL	NULL	NULL	NULL	NULL	NULL	NULL
大创sc-iat	1	1	<?xml version="1.0"?>\n<Clock xmlns:dt="urn:schemas-microsoft-com:datatypes"><Description dt:dt="string">E-Prime Primary Realtime Clock</Description><StartTime><Timestamp dt:dt="int">0</Timestamp><DateUtc dt:dt="string">2021-10-21T10:44:38Z</DateUtc></StartTime><FrequencyChanges><FrequencyChange><Frequency dt:dt="r8">10000000</Frequency><Timestamp dt:dt="r8">17122103608621</Timestamp><Current dt:…	59.959	1.0.0.17	1	-1928908105	2.0.10.182	10-21-2021	2021-10-21 10:44:39	18:44:39	2.0.10.92	1	affpro	WordList	1	1	1	129	j	NULL	NULL	NULL	NULL	NULL	NULL	NULL	NULL	2	NULL	NULL	NULL	NULL	NULL	NULL	NULL	NULL	NULL	NULL	pra4	taskList2	高风险的	NULL	NULL	NULL	NULL	NULL	NULL	NULL
大创sc-iat	1	1	<?xml version="1.0"?>\n<Clock xmlns:dt="urn:schemas-microsoft-com:datatypes"><Description dt:dt="string">E-Prime Primary Realtime Clock</Description><StartTime><Timestamp dt:dt="int">0</Timestamp><DateUtc dt:dt="string">2021-10-21T10:44:38Z</DateUtc></StartTime><FrequencyChanges><FrequencyChange><Frequency dt:dt="r8">10000000</Frequency><Timestamp dt:dt="r8">17122103608621</Timestamp><Current dt:…	59.959	1.0.0.17	1	-1928908105	2.0.10.182	10-21-2021	2021-10-21 10:44:39	18:44:39	2.0.10.92	1	affpro	WordList	1	1	1	130	f	NULL	NULL	NULL	NULL	NULL	NULL	NULL	NULL	NULL	NULL	NULL	NULL	2	NULL	NULL	NULL	NULL	NULL	NULL	pra4	taskList2	高产的	NULL	NULL	NULL	NULL	NULL	NULL	NULL
大创sc-iat	1	1	<?xml version="1.0"?>\n<Clock xmlns:dt="urn:schemas-microsoft-com:datatypes"><Description dt:dt="string">E-Prime Primary Realtime Clock</Description><StartTime><Timestamp dt:dt="int">0</Timestamp><DateUtc dt:dt="string">2021-10-21T10:44:38Z</DateUtc></StartTime><FrequencyChanges><FrequencyChange><Frequency dt:dt="r8">10000000</Frequency><Timestamp dt:dt="r8">17122103608621</Timestamp><Current dt:…	59.959	1.0.0.17	1	-1928908105	2.0.10.182	10-21-2021	2021-10-21 10:44:39	18:44:39	2.0.10.92	1	affpro	WordList	1	1	1	131	j	NULL	NULL	NULL	NULL	4	NULL	NULL	NULL	NULL	NULL	NULL	NULL	NULL	NULL	NULL	NULL	NULL	NULL	NULL	pra4	taskList2	动物转基因	NULL	NULL	NULL	NULL	NULL	NULL	NULL
大创sc-iat	1	1	<?xml version="1.0"?>\n<Clock xmlns:dt="urn:schemas-microsoft-com:datatypes"><Description dt:dt="string">E-Prime Primary Realtime Clock</Description><StartTime><Timestamp dt:dt="int">0</Timestamp><DateUtc dt:dt="string">2021-10-21T10:44:38Z</DateUtc></StartTime><FrequencyChanges><FrequencyChange><Frequency dt:dt="r8">10000000</Frequency><Timestamp dt:dt="r8">17122103608621</Timestamp><Current dt:…	59.959	1.0.0.17	1	-1928908105	2.0.10.182	10-21-2021	2021-10-21 10:44:39	18:44:39	2.0.10.92	1	affpro	WordList	1	1	1	132	f	NULL	NULL	NULL	NULL	NULL	NULL	NULL	NULL	NULL	NULL	NULL	NULL	3	NULL	NULL	NULL	NULL	NULL	NULL	pra4	taskList2	高科技的	NULL	NULL	NULL	NULL	NULL	NULL	NULL
大创sc-iat	1	1	<?xml version="1.0"?>\n<Clock xmlns:dt="urn:schemas-microsoft-com:datatypes"><Description dt:dt="string">E-Prime Primary Realtime Clock</Description><StartTime><Timestamp dt:dt="int">0</Timestamp><DateUtc dt:dt="string">2021-10-21T10:44:38Z</DateUtc></StartTime><FrequencyChanges><FrequencyChange><Frequency dt:dt="r8">10000000</Frequency><Timestamp dt:dt="r8">17122103608621</Timestamp><Current dt:…	59.959	1.0.0.17	1	-1928908105	2.0.10.182	10-21-2021	2021-10-21 10:44:39	18:44:39	2.0.10.92	1	affpro	WordList	1	1	1	133	j	NULL	NULL	NULL	NULL	NULL	NULL	NULL	NULL	4	NULL	NULL	NULL	NULL	NULL	NULL	NULL	NULL	NULL	NULL	pra4	taskList2	有争议的	NULL	NULL	NULL	NULL	NULL	NULL	NULL
大创sc-iat	1	1	<?xml version="1.0"?>\n<Clock xmlns:dt="urn:schemas-microsoft-com:datatypes"><Description dt:dt="string">E-Prime Primary Realtime Clock</Description><StartTime><Timestamp dt:dt="int">0</Timestamp><DateUtc dt:dt="string">2021-10-21T10:44:38Z</DateUtc></StartTime><FrequencyChanges><FrequencyChange><Frequency dt:dt="r8">10000000</Frequency><Timestamp dt:dt="r8">17122103608621</Timestamp><Current dt:…	59.959	1.0.0.17	1	-1928908105	2.0.10.182	10-21-2021	2021-10-21 10:44:39	18:44:39	2.0.10.92	1	affpro	WordList	1	1	1	134	f	NULL	NULL	NULL	NULL	NULL	NULL	NULL	NULL	NULL	NULL	NULL	NULL	4	NULL	NULL	NULL	NULL	NULL	NULL	pra4	taskList2	创新的	NULL	NULL	NULL	NULL	NULL	NULL	NULL
大创sc-iat	1	1	<?xml version="1.0"?>\n<Clock xmlns:dt="urn:schemas-microsoft-com:datatypes"><Description dt:dt="string">E-Prime Primary Realtime Clock</Description><StartTime><Timestamp dt:dt="int">0</Timestamp><DateUtc dt:dt="string">2021-10-21T10:44:38Z</DateUtc></StartTime><FrequencyChanges><FrequencyChange><Frequency dt:dt="r8">10000000</Frequency><Timestamp dt:dt="r8">17122103608621</Timestamp><Current dt:…	59.959	1.0.0.17	1	-1928908105	2.0.10.182	10-21-2021	2021-10-21 10:44:39	18:44:39	2.0.10.92	1	affpro	WordList	1	1	1	135	f	NULL	NULL	NULL	NULL	NULL	NULL	NULL	NULL	NULL	NULL	NULL	NULL	1	NULL	NULL	NULL	NULL	NULL	NULL	pra4	taskList2	科学的	NULL	NULL	NULL	NULL	NULL	NULL	NULL
大创sc-iat	1	1	<?xml version="1.0"?>\n<Clock xmlns:dt="urn:schemas-microsoft-com:datatypes"><Description dt:dt="string">E-Prime Primary Realtime Clock</Description><StartTime><Timestamp dt:dt="int">0</Timestamp><DateUtc dt:dt="string">2021-10-21T10:44:38Z</DateUtc></StartTime><FrequencyChanges><FrequencyChange><Frequency dt:dt="r8">10000000</Frequency><Timestamp dt:dt="r8">17122103608621</Timestamp><Current dt:…	59.959	1.0.0.17	1	-1928908105	2.0.10.182	10-21-2021	2021-10-21 10:44:39	18:44:39	2.0.10.92	1	affpro	WordList	1	1	1	136	j	NULL	NULL	NULL	NULL	1	NULL	NULL	NULL	NULL	NULL	NULL	NULL	NULL	NULL	NULL	NULL	NULL	NULL	NULL	pra4	taskList2	转基因食物	NULL	NULL	NULL	NULL	NULL	NULL	NULL
大创sc-iat	1	1	<?xml version="1.0"?>\n<Clock xmlns:dt="urn:schemas-microsoft-com:datatypes"><Description dt:dt="string">E-Prime Primary Realtime Clock</Description><StartTime><Timestamp dt:dt="int">0</Timestamp><DateUtc dt:dt="string">2021-10-21T10:44:38Z</DateUtc></StartTime><FrequencyChanges><FrequencyChange><Frequency dt:dt="r8">10000000</Frequency><Timestamp dt:dt="r8">17122103608621</Timestamp><Current dt:…	59.959	1.0.0.17	1	-1928908105	2.0.10.182	10-21-2021	2021-10-21 10:44:39	18:44:39	2.0.10.92	1	affpro	WordList	1	1	1	137	f	NULL	NULL	NULL	NULL	NULL	NULL	NULL	NULL	NULL	NULL	NULL	NULL	2	NULL	NULL	NULL	NULL	NULL	NULL	pra4	taskList2	高产的	NULL	NULL	NULL	NULL	NULL	NULL	NULL
大创sc-iat	1	1	<?xml version="1.0"?>\n<Clock xmlns:dt="urn:schemas-microsoft-com:datatypes"><Description dt:dt="string">E-Prime Primary Realtime Clock</Description><StartTime><Timestamp dt:dt="int">0</Timestamp><DateUtc dt:dt="string">2021-10-21T10:44:38Z</DateUtc></StartTime><FrequencyChanges><FrequencyChange><Frequency dt:dt="r8">10000000</Frequency><Timestamp dt:dt="r8">17122103608621</Timestamp><Current dt:…	59.959	1.0.0.17	1	-1928908105	2.0.10.182	10-21-2021	2021-10-21 10:44:39	18:44:39	2.0.10.92	1	affpro	WordList	1	1	1	138	f	NULL	NULL	NULL	NULL	NULL	NULL	NULL	NULL	NULL	NULL	NULL	NULL	3	NULL	NULL	NULL	NULL	NULL	NULL	pra4	taskList2	高科技的	NULL	NULL	NULL	NULL	NULL	NULL	NULL
大创sc-iat	1	1	<?xml version="1.0"?>\n<Clock xmlns:dt="urn:schemas-microsoft-com:datatypes"><Description dt:dt="string">E-Prime Primary Realtime Clock</Description><StartTime><Timestamp dt:dt="int">0</Timestamp><DateUtc dt:dt="string">2021-10-21T10:44:38Z</DateUtc></StartTime><FrequencyChanges><FrequencyChange><Frequency dt:dt="r8">10000000</Frequency><Timestamp dt:dt="r8">17122103608621</Timestamp><Current dt:…	59.959	1.0.0.17	1	-1928908105	2.0.10.182	10-21-2021	2021-10-21 10:44:39	18:44:39	2.0.10.92	1	affpro	WordList	1	1	1	139	j	NULL	NULL	NULL	NULL	2	NULL	NULL	NULL	NULL	NULL	NULL	NULL	NULL	NULL	NULL	NULL	NULL	NULL	NULL	pra4	taskList2	抗虫害棉花	NULL	NULL	NULL	NULL	NULL	NULL	NULL
大创sc-iat	1	1	<?xml version="1.0"?>\n<Clock xmlns:dt="urn:schemas-microsoft-com:datatypes"><Description dt:dt="string">E-Prime Primary Realtime Clock</Description><StartTime><Timestamp dt:dt="int">0</Timestamp><DateUtc dt:dt="string">2021-10-21T10:44:38Z</DateUtc></StartTime><FrequencyChanges><FrequencyChange><Frequency dt:dt="r8">10000000</Frequency><Timestamp dt:dt="r8">17122103608621</Timestamp><Current dt:…	59.959	1.0.0.17	1	-1928908105	2.0.10.182	10-21-2021	2021-10-21 10:44:39	18:44:39	2.0.10.92	1	affpro	WordList	1	1	1	140	j	NULL	NULL	NULL	NULL	NULL	NULL	NULL	NULL	3	NULL	NULL	NULL	NULL	NULL	NULL	NULL	NULL	NULL	NULL	pra4	taskList2	非天然的	NULL	NULL	NULL	NULL	NULL	NULL	NULL
大创sc-iat	1	1	<?xml version="1.0"?>\n<Clock xmlns:dt="urn:schemas-microsoft-com:datatypes"><Description dt:dt="string">E-Prime Primary Realtime Clock</Description><StartTime><Timestamp dt:dt="int">0</Timestamp><DateUtc dt:dt="string">2021-10-21T10:44:38Z</DateUtc></StartTime><FrequencyChanges><FrequencyChange><Frequency dt:dt="r8">10000000</Frequency><Timestamp dt:dt="r8">17122103608621</Timestamp><Current dt:…	59.959	1.0.0.17	1	-1928908105	2.0.10.182	10-21-2021	2021-10-21 10:44:39	18:44:39	2.0.10.92	1	affpro	WordList	1	1	1	141	f	NULL	NULL	NULL	NULL	NULL	NULL	NULL	NULL	NULL	NULL	NULL	NULL	4	NULL	NULL	NULL	NULL	NULL	NULL	pra4	taskList2	创新的	NULL	NULL	NULL	NULL	NULL	NULL	NULL
大创sc-iat	1	1	<?xml version="1.0"?>\n<Clock xmlns:dt="urn:schemas-microsoft-com:datatypes"><Description dt:dt="string">E-Prime Primary Realtime Clock</Description><StartTime><Timestamp dt:dt="int">0</Timestamp><DateUtc dt:dt="string">2021-10-21T10:44:38Z</DateUtc></StartTime><FrequencyChanges><FrequencyChange><Frequency dt:dt="r8">10000000</Frequency><Timestamp dt:dt="r8">17122103608621</Timestamp><Current dt:…	59.959	1.0.0.17	1	-1928908105	2.0.10.182	10-21-2021	2021-10-21 10:44:39	18:44:39	2.0.10.92	1	affpro	WordList	1	1	1	142	j	NULL	NULL	NULL	NULL	NULL	NULL	NULL	NULL	4	NULL	NULL	NULL	NULL	NULL	NULL	NULL	NULL	NULL	NULL	pra4	taskList2	有争议的	NULL	NULL	NULL	NULL	NULL	NULL	NULL
大创sc-iat	1	1	<?xml version="1.0"?>\n<Clock xmlns:dt="urn:schemas-microsoft-com:datatypes"><Description dt:dt="string">E-Prime Primary Realtime Clock</Description><StartTime><Timestamp dt:dt="int">0</Timestamp><DateUtc dt:dt="string">2021-10-21T10:44:38Z</DateUtc></StartTime><FrequencyChanges><FrequencyChange><Frequency dt:dt="r8">10000000</Frequency><Timestamp dt:dt="r8">17122103608621</Timestamp><Current dt:…	59.959	1.0.0.17	1	-1928908105	2.0.10.182	10-21-2021	2021-10-21 10:44:39	18:44:39	2.0.10.92	1	affpro	WordList	1	1	1	143	f	NULL	NULL	NULL	NULL	NULL	NULL	NULL	NULL	NULL	NULL	NULL	NULL	1	NULL	NULL	NULL	NULL	NULL	NULL	pra4	taskList2	科学的	NULL	NULL	NULL	NULL	NULL	NULL	NULL
大创sc-iat	1	1	<?xml version="1.0"?>\n<Clock xmlns:dt="urn:schemas-microsoft-com:datatypes"><Description dt:dt="string">E-Prime Primary Realtime Clock</Description><StartTime><Timestamp dt:dt="int">0</Timestamp><DateUtc dt:dt="string">2021-10-21T10:44:38Z</DateUtc></StartTime><FrequencyChanges><FrequencyChange><Frequency dt:dt="r8">10000000</Frequency><Timestamp dt:dt="r8">17122103608621</Timestamp><Current dt:…	59.959	1.0.0.17	1	-1928908105	2.0.10.182	10-21-2021	2021-10-21 10:44:39	18:44:39	2.0.10.92	1	affpro	WordList	1	1	1	144	j	NULL	NULL	NULL	NULL	4	NULL	NULL	NULL	NULL	NULL	NULL	NULL	NULL	NULL	NULL	NULL	NULL	NULL	NULL	pra4	taskList2	动物转基因	NULL	NULL	NULL	NULL	NULL	NULL	NULL
大创sc-iat	1	1	<?xml version="1.0"?>\n<Clock xmlns:dt="urn:schemas-microsoft-com:datatypes"><Description dt:dt="string">E-Prime Primary Realtime Clock</Description><StartTime><Timestamp dt:dt="int">0</Timestamp><DateUtc dt:dt="string">2021-10-21T10:44:38Z</DateUtc></StartTime><FrequencyChanges><FrequencyChange><Frequency dt:dt="r8">10000000</Frequency><Timestamp dt:dt="r8">17122103608621</Timestamp><Current dt:…	59.959	1.0.0.17	1	-1928908105	2.0.10.182	10-21-2021	2021-10-21 10:44:39	18:44:39	2.0.10.92	1	affpro	WordList	1	1	1	145	f	NULL	NULL	NULL	NULL	NULL	NULL	NULL	NULL	NULL	NULL	NULL	NULL	3	NULL	NULL	NULL	NULL	NULL	NULL	pra4	taskList2	高科技的	NULL	NULL	NULL	NULL	NULL	NULL	NULL
大创sc-iat	1	1	<?xml version="1.0"?>\n<Clock xmlns:dt="urn:schemas-microsoft-com:datatypes"><Description dt:dt="string">E-Prime Primary Realtime Clock</Description><StartTime><Timestamp dt:dt="int">0</Timestamp><DateUtc dt:dt="string">2021-10-21T10:44:38Z</DateUtc></StartTime><FrequencyChanges><FrequencyChange><Frequency dt:dt="r8">10000000</Frequency><Timestamp dt:dt="r8">17122103608621</Timestamp><Current dt:…	59.959	1.0.0.17	1	-1928908105	2.0.10.182	10-21-2021	2021-10-21 10:44:39	18:44:39	2.0.10.92	1	affpro	WordList	1	1	1	146	f	NULL	NULL	NULL	NULL	NULL	NULL	NULL	NULL	NULL	NULL	NULL	NULL	2	NULL	NULL	NULL	NULL	NULL	NULL	pra4	taskList2	高产的	NULL	NULL	NULL	NULL	NULL	NULL	NULL
大创sc-iat	1	1	<?xml version="1.0"?>\n<Clock xmlns:dt="urn:schemas-microsoft-com:datatypes"><Description dt:dt="string">E-Prime Primary Realtime Clock</Description><StartTime><Timestamp dt:dt="int">0</Timestamp><DateUtc dt:dt="string">2021-10-21T10:44:38Z</DateUtc></StartTime><FrequencyChanges><FrequencyChange><Frequency dt:dt="r8">10000000</Frequency><Timestamp dt:dt="r8">17122103608621</Timestamp><Current dt:…	59.959	1.0.0.17	1	-1928908105	2.0.10.182	10-21-2021	2021-10-21 10:44:39	18:44:39	2.0.10.92	1	affpro	WordList	1	1	1	147	j	NULL	NULL	NULL	NULL	NULL	NULL	NULL	NULL	1	NULL	NULL	NULL	NULL	NULL	NULL	NULL	NULL	NULL	NULL	pra4	taskList2	不成熟的	NULL	NULL	NULL	NULL	NULL	NULL	NULL
大创sc-iat	1	1	<?xml version="1.0"?>\n<Clock xmlns:dt="urn:schemas-microsoft-com:datatypes"><Description dt:dt="string">E-Prime Primary Realtime Clock</Description><StartTime><Timestamp dt:dt="int">0</Timestamp><DateUtc dt:dt="string">2021-10-21T10:44:38Z</DateUtc></StartTime><FrequencyChanges><FrequencyChange><Frequency dt:dt="r8">10000000</Frequency><Timestamp dt:dt="r8">17122103608621</Timestamp><Current dt:…	59.959	1.0.0.17	1	-1928908105	2.0.10.182	10-21-2021	2021-10-21 10:44:39	18:44:39	2.0.10.92	1	affpro	WordList	1	1	1	148	j	NULL	NULL	NULL	NULL	3	NULL	NULL	NULL	NULL	NULL	NULL	NULL	NULL	NULL	NULL	NULL	NULL	NULL	NULL	pra4	taskList2	转基因大豆	NULL	NULL	NULL	NULL	NULL	NULL	NULL
大创sc-iat	1	1	<?xml version="1.0"?>\n<Clock xmlns:dt="urn:schemas-microsoft-com:datatypes"><Description dt:dt="string">E-Prime Primary Realtime Clock</Description><StartTime><Timestamp dt:dt="int">0</Timestamp><DateUtc dt:dt="string">2021-10-21T10:44:38Z</DateUtc></StartTime><FrequencyChanges><FrequencyChange><Frequency dt:dt="r8">10000000</Frequency><Timestamp dt:dt="r8">17122103608621</Timestamp><Current dt:…	59.959	1.0.0.17	1	-1928908105	2.0.10.182	10-21-2021	2021-10-21 10:44:39	18:44:39	2.0.10.92	1	affpro	WordList	1	1	1	149	f	NULL	NULL	NULL	NULL	NULL	NULL	NULL	NULL	NULL	NULL	NULL	NULL	1	NULL	NULL	NULL	NULL	NULL	NULL	pra4	taskList2	科学的	NULL	NULL	NULL	NULL	NULL	NULL	NULL
大创sc-iat	1	1	<?xml version="1.0"?>\n<Clock xmlns:dt="urn:schemas-microsoft-com:datatypes"><Description dt:dt="string">E-Prime Primary Realtime Clock</Description><StartTime><Timestamp dt:dt="int">0</Timestamp><DateUtc dt:dt="string">2021-10-21T10:44:38Z</DateUtc></StartTime><FrequencyChanges><FrequencyChange><Frequency dt:dt="r8">10000000</Frequency><Timestamp dt:dt="r8">17122103608621</Timestamp><Current dt:…	59.959	1.0.0.17	1	-1928908105	2.0.10.182	10-21-2021	2021-10-21 10:44:39	18:44:39	2.0.10.92	1	affpro	WordList	1	1	1	150	f	NULL	NULL	NULL	NULL	NULL	NULL	NULL	NULL	NULL	NULL	NULL	NULL	4	NULL	NULL	NULL	NULL	NULL	NULL	pra4	taskList2	创新的	NULL	NULL	NULL	NULL	NULL	NULL	NULL
大创sc-iat	1	1	<?xml version="1.0"?>\n<Clock xmlns:dt="urn:schemas-microsoft-com:datatypes"><Description dt:dt="string">E-Prime Primary Realtime Clock</Description><StartTime><Timestamp dt:dt="int">0</Timestamp><DateUtc dt:dt="string">2021-10-21T10:44:38Z</DateUtc></StartTime><FrequencyChanges><FrequencyChange><Frequency dt:dt="r8">10000000</Frequency><Timestamp dt:dt="r8">17122103608621</Timestamp><Current dt:…	59.959	1.0.0.17	1	-1928908105	2.0.10.182	10-21-2021	2021-10-21 10:44:39	18:44:39	2.0.10.92	1	affpro	WordList	1	1	1	151	j	NULL	NULL	NULL	NULL	NULL	NULL	NULL	NULL	2	NULL	NULL	NULL	NULL	NULL	NULL	NULL	NULL	NULL	NULL	pra4	taskList2	高风险的	NULL	NULL	NULL	NULL	NULL	NULL	NULL
大创sc-iat	1	1	<?xml version="1.0"?>\n<Clock xmlns:dt="urn:schemas-microsoft-com:datatypes"><Description dt:dt="string">E-Prime Primary Realtime Clock</Description><StartTime><Timestamp dt:dt="int">0</Timestamp><DateUtc dt:dt="string">2021-10-21T10:44:38Z</DateUtc></StartTime><FrequencyChanges><FrequencyChange><Frequency dt:dt="r8">10000000</Frequency><Timestamp dt:dt="r8">17122103608621</Timestamp><Current dt:…	59.959	1.0.0.17	1	-1928908105	2.0.10.182	10-21-2021	2021-10-21 10:44:39	18:44:39	2.0.10.92	1	affpro	WordList	1	1	1	152	j	NULL	NULL	NULL	NULL	1	NULL	NULL	NULL	NULL	NULL	NULL	NULL	NULL	NULL	NULL	NULL	NULL	NULL	NULL	pra4	taskList2	转基因食物	NULL	NULL	NULL	NULL	NULL	NULL	NULL
大创sc-iat	1	1	<?xml version="1.0"?>\n<Clock xmlns:dt="urn:schemas-microsoft-com:datatypes"><Description dt:dt="string">E-Prime Primary Realtime Clock</Description><StartTime><Timestamp dt:dt="int">0</Timestamp><DateUtc dt:dt="string">2021-10-21T10:44:38Z</DateUtc></StartTime><FrequencyChanges><FrequencyChange><Frequency dt:dt="r8">10000000</Frequency><Timestamp dt:dt="r8">17122103608621</Timestamp><Current dt:…	59.959	1.0.0.17	1	-1928908105	2.0.10.182	10-21-2021	2021-10-21 10:44:39	18:44:39	2.0.10.92	1	affpro	WordList	1	1	1	153	j	NULL	NULL	NULL	NULL	NULL	NULL	NULL	NULL	4	NULL	NULL	NULL	NULL	NULL	NULL	NULL	NULL	NULL	NULL	pra4	taskList2	有争议的	NULL	NULL	NULL	NULL	NULL	NULL	NULL
大创sc-iat	1	1	<?xml version="1.0"?>\n<Clock xmlns:dt="urn:schemas-microsoft-com:datatypes"><Description dt:dt="string">E-Prime Primary Realtime Clock</Description><StartTime><Timestamp dt:dt="int">0</Timestamp><DateUtc dt:dt="string">2021-10-21T10:44:38Z</DateUtc></StartTime><FrequencyChanges><FrequencyChange><Frequency dt:dt="r8">10000000</Frequency><Timestamp dt:dt="r8">17122103608621</Timestamp><Current dt:…	59.959	1.0.0.17	1	-1928908105	2.0.10.182	10-21-2021	2021-10-21 10:44:39	18:44:39	2.0.10.92	1	affpro	WordList	1	1	1	154	f	NULL	NULL	NULL	NULL	NULL	NULL	NULL	NULL	NULL	NULL	NULL	NULL	3	NULL	NULL	NULL	NULL	NULL	NULL	pra4	taskList2	高科技的	NULL	NULL	NULL	NULL	NULL	NULL	NULL
大创sc-iat	1	1	<?xml version="1.0"?>\n<Clock xmlns:dt="urn:schemas-microsoft-com:datatypes"><Description dt:dt="string">E-Prime Primary Realtime Clock</Description><StartTime><Timestamp dt:dt="int">0</Timestamp><DateUtc dt:dt="string">2021-10-21T10:44:38Z</DateUtc></StartTime><FrequencyChanges><FrequencyChange><Frequency dt:dt="r8">10000000</Frequency><Timestamp dt:dt="r8">17122103608621</Timestamp><Current dt:…	59.959	1.0.0.17	1	-1928908105	2.0.10.182	10-21-2021	2021-10-21 10:44:39	18:44:39	2.0.10.92	1	affpro	WordList	1	1	1	155	j	NULL	NULL	NULL	NULL	3	NULL	NULL	NULL	NULL	NULL	NULL	NULL	NULL	NULL	NULL	NULL	NULL	NULL	NULL	pra4	taskList2	转基因大豆	NULL	NULL	NULL	NULL	NULL	NULL	NULL
大创sc-iat	1	1	<?xml version="1.0"?>\n<Clock xmlns:dt="urn:schemas-microsoft-com:datatypes"><Description dt:dt="string">E-Prime Primary Realtime Clock</Description><StartTime><Timestamp dt:dt="int">0</Timestamp><DateUtc dt:dt="string">2021-10-21T10:44:38Z</DateUtc></StartTime><FrequencyChanges><FrequencyChange><Frequency dt:dt="r8">10000000</Frequency><Timestamp dt:dt="r8">17122103608621</Timestamp><Current dt:…	59.959	1.0.0.17	1	-1928908105	2.0.10.182	10-21-2021	2021-10-21 10:44:39	18:44:39	2.0.10.92	1	affpro	WordList	1	1	1	156	f	NULL	NULL	NULL	NULL	NULL	NULL	NULL	NULL	NULL	NULL	NULL	NULL	4	NULL	NULL	NULL	NULL	NULL	NULL	pra4	taskList2	创新的	NULL	NULL	NULL	NULL	NULL	NULL	NULL
大创sc-iat	1	1	<?xml version="1.0"?>\n<Clock xmlns:dt="urn:schemas-microsoft-com:datatypes"><Description dt:dt="string">E-Prime Primary Realtime Clock</Description><StartTime><Timestamp dt:dt="int">0</Timestamp><DateUtc dt:dt="string">2021-10-21T10:44:38Z</DateUtc></StartTime><FrequencyChanges><FrequencyChange><Frequency dt:dt="r8">10000000</Frequency><Timestamp dt:dt="r8">17122103608621</Timestamp><Current dt:…	59.959	1.0.0.17	1	-1928908105	2.0.10.182	10-21-2021	2021-10-21 10:44:39	18:44:39	2.0.10.92	1	affpro	WordList	1	1	1	157	j	NULL	NULL	NULL	NULL	4	NULL	NULL	NULL	NULL	NULL	NULL	NULL	NULL	NULL	NULL	NULL	NULL	NULL	NULL	pra4	taskList2	动物转基因	NULL	NULL	NULL	NULL	NULL	NULL	NULL
大创sc-iat	1	1	<?xml version="1.0"?>\n<Clock xmlns:dt="urn:schemas-microsoft-com:datatypes"><Description dt:dt="string">E-Prime Primary Realtime Clock</Description><StartTime><Timestamp dt:dt="int">0</Timestamp><DateUtc dt:dt="string">2021-10-21T10:44:38Z</DateUtc></StartTime><FrequencyChanges><FrequencyChange><Frequency dt:dt="r8">10000000</Frequency><Timestamp dt:dt="r8">17122103608621</Timestamp><Current dt:…	59.959	1.0.0.17	1	-1928908105	2.0.10.182	10-21-2021	2021-10-21 10:44:39	18:44:39	2.0.10.92	1	affpro	WordList	1	1	1	158	j	NULL	NULL	NULL	NULL	NULL	NULL	NULL	NULL	3	NULL	NULL	NULL	NULL	NULL	NULL	NULL	NULL	NULL	NULL	pra4	taskList2	非天然的	NULL	NULL	NULL	NULL	NULL	NULL	NULL
大创sc-iat	1	1	<?xml version="1.0"?>\n<Clock xmlns:dt="urn:schemas-microsoft-com:datatypes"><Description dt:dt="string">E-Prime Primary Realtime Clock</Description><StartTime><Timestamp dt:dt="int">0</Timestamp><DateUtc dt:dt="string">2021-10-21T10:44:38Z</DateUtc></StartTime><FrequencyChanges><FrequencyChange><Frequency dt:dt="r8">10000000</Frequency><Timestamp dt:dt="r8">17122103608621</Timestamp><Current dt:…	59.959	1.0.0.17	1	-1928908105	2.0.10.182	10-21-2021	2021-10-21 10:44:39	18:44:39	2.0.10.92	1	affpro	WordList	1	1	1	159	f	NULL	NULL	NULL	NULL	NULL	NULL	NULL	NULL	NULL	NULL	NULL	NULL	1	NULL	NULL	NULL	NULL	NULL	NULL	pra4	taskList2	科学的	NULL	NULL	NULL	NULL	NULL	NULL	NULL
大创sc-iat	1	1	<?xml version="1.0"?>\n<Clock xmlns:dt="urn:schemas-microsoft-com:datatypes"><Description dt:dt="string">E-Prime Primary Realtime Clock</Description><StartTime><Timestamp dt:dt="int">0</Timestamp><DateUtc dt:dt="string">2021-10-21T10:44:38Z</DateUtc></StartTime><FrequencyChanges><FrequencyChange><Frequency dt:dt="r8">10000000</Frequency><Timestamp dt:dt="r8">17122103608621</Timestamp><Current dt:…	59.959	1.0.0.17	1	-1928908105	2.0.10.182	10-21-2021	2021-10-21 10:44:39	18:44:39	2.0.10.92	1	affpro	WordList	1	1	1	160	f	NULL	NULL	NULL	NULL	NULL	NULL	NULL	NULL	NULL	NULL	NULL	NULL	2	NULL	NULL	NULL	NULL	NULL	NULL	pra4	taskList2	高产的	NULL	NULL	NULL	NULL	NULL	NULL	NULL
大创sc-iat	1	1	<?xml version="1.0"?>\n<Clock xmlns:dt="urn:schemas-microsoft-com:datatypes"><Description dt:dt="string">E-Prime Primary Realtime Clock</Description><StartTime><Timestamp dt:dt="int">0</Timestamp><DateUtc dt:dt="string">2021-10-21T10:44:38Z</DateUtc></StartTime><FrequencyChanges><FrequencyChange><Frequency dt:dt="r8">10000000</Frequency><Timestamp dt:dt="r8">17122103608621</Timestamp><Current dt:…	59.959	1.0.0.17	1	-1928908105	2.0.10.182	10-21-2021	2021-10-21 10:44:39	18:44:39	2.0.10.92	1	affpro	WordList	1	1	1	161	j	NULL	NULL	NULL	NULL	1	NULL	NULL	NULL	NULL	NULL	NULL	NULL	NULL	NULL	NULL	NULL	NULL	NULL	NULL	pra4	taskList2	转基因食物	NULL	NULL	NULL	NULL	NULL	NULL	NULL
大创sc-iat	1	1	<?xml version="1.0"?>\n<Clock xmlns:dt="urn:schemas-microsoft-com:datatypes"><Description dt:dt="string">E-Prime Primary Realtime Clock</Description><StartTime><Timestamp dt:dt="int">0</Timestamp><DateUtc dt:dt="string">2021-10-21T10:44:38Z</DateUtc></StartTime><FrequencyChanges><FrequencyChange><Frequency dt:dt="r8">10000000</Frequency><Timestamp dt:dt="r8">17122103608621</Timestamp><Current dt:…	59.959	1.0.0.17	1	-1928908105	2.0.10.182	10-21-2021	2021-10-21 10:44:39	18:44:39	2.0.10.92	1	affpro	WordList	1	1	1	162	f	NULL	NULL	NULL	NULL	NULL	NULL	NULL	NULL	NULL	NULL	NULL	NULL	1	NULL	NULL	NULL	NULL	NULL	NULL	pra4	taskList2	科学的	NULL	NULL	NULL	NULL	NULL	NULL	NULL
大创sc-iat	1	1	<?xml version="1.0"?>\n<Clock xmlns:dt="urn:schemas-microsoft-com:datatypes"><Description dt:dt="string">E-Prime Primary Realtime Clock</Description><StartTime><Timestamp dt:dt="int">0</Timestamp><DateUtc dt:dt="string">2021-10-21T10:44:38Z</DateUtc></StartTime><FrequencyChanges><FrequencyChange><Frequency dt:dt="r8">10000000</Frequency><Timestamp dt:dt="r8">17122103608621</Timestamp><Current dt:…	59.959	1.0.0.17	1	-1928908105	2.0.10.182	10-21-2021	2021-10-21 10:44:39	18:44:39	2.0.10.92	1	affpro	WordList	1	1	1	163	j	NULL	NULL	NULL	NULL	NULL	NULL	NULL	NULL	1	NULL	NULL	NULL	NULL	NULL	NULL	NULL	NULL	NULL	NULL	pra4	taskList2	不成熟的	NULL	NULL	NULL	NULL	NULL	NULL	NULL
大创sc-iat	1	1	<?xml version="1.0"?>\n<Clock xmlns:dt="urn:schemas-microsoft-com:datatypes"><Description dt:dt="string">E-Prime Primary Realtime Clock</Description><StartTime><Timestamp dt:dt="int">0</Timestamp><DateUtc dt:dt="string">2021-10-21T10:44:38Z</DateUtc></StartTime><FrequencyChanges><FrequencyChange><Frequency dt:dt="r8">10000000</Frequency><Timestamp dt:dt="r8">17122103608621</Timestamp><Current dt:…	59.959	1.0.0.17	1	-1928908105	2.0.10.182	10-21-2021	2021-10-21 10:44:39	18:44:39	2.0.10.92	1	affpro	WordList	1	1	1	164	f	NULL	NULL	NULL	NULL	NULL	NULL	NULL	NULL	NULL	NULL	NULL	NULL	4	NULL	NULL	NULL	NULL	NULL	NULL	pra4	taskList2	创新的	NULL	NULL	NULL	NULL	NULL	NULL	NULL
大创sc-iat	1	1	<?xml version="1.0"?>\n<Clock xmlns:dt="urn:schemas-microsoft-com:datatypes"><Description dt:dt="string">E-Prime Primary Realtime Clock</Description><StartTime><Timestamp dt:dt="int">0</Timestamp><DateUtc dt:dt="string">2021-10-21T10:44:38Z</DateUtc></StartTime><FrequencyChanges><FrequencyChange><Frequency dt:dt="r8">10000000</Frequency><Timestamp dt:dt="r8">17122103608621</Timestamp><Current dt:…	59.959	1.0.0.17	1	-1928908105	2.0.10.182	10-21-2021	2021-10-21 10:44:39	18:44:39	2.0.10.92	1	affpro	WordList	1	1	1	165	j	NULL	NULL	NULL	NULL	NULL	NULL	NULL	NULL	2	NULL	NULL	NULL	NULL	NULL	NULL	NULL	NULL	NULL	NULL	pra4	taskList2	高风险的	NULL	NULL	NULL	NULL	NULL	NULL	NULL
大创sc-iat	1	1	<?xml version="1.0"?>\n<Clock xmlns:dt="urn:schemas-microsoft-com:datatypes"><Description dt:dt="string">E-Prime Primary Realtime Clock</Description><StartTime><Timestamp dt:dt="int">0</Timestamp><DateUtc dt:dt="string">2021-10-21T10:44:38Z</DateUtc></StartTime><FrequencyChanges><FrequencyChange><Frequency dt:dt="r8">10000000</Frequency><Timestamp dt:dt="r8">17122103608621</Timestamp><Current dt:…	59.959	1.0.0.17	1	-1928908105	2.0.10.182	10-21-2021	2021-10-21 10:44:39	18:44:39	2.0.10.92	1	affpro	WordList	1	1	1	166	f	NULL	NULL	NULL	NULL	NULL	NULL	NULL	NULL	NULL	NULL	NULL	NULL	2	NULL	NULL	NULL	NULL	NULL	NULL	pra4	taskList2	高产的	NULL	NULL	NULL	NULL	NULL	NULL	NULL
大创sc-iat	1	1	<?xml version="1.0"?>\n<Clock xmlns:dt="urn:schemas-microsoft-com:datatypes"><Description dt:dt="string">E-Prime Primary Realtime Clock</Description><StartTime><Timestamp dt:dt="int">0</Timestamp><DateUtc dt:dt="string">2021-10-21T10:44:38Z</DateUtc></StartTime><FrequencyChanges><FrequencyChange><Frequency dt:dt="r8">10000000</Frequency><Timestamp dt:dt="r8">17122103608621</Timestamp><Current dt:…	59.959	1.0.0.17	1	-1928908105	2.0.10.182	10-21-2021	2021-10-21 10:44:39	18:44:39	2.0.10.92	1	affpro	WordList	1	1	1	167	f	NULL	NULL	NULL	NULL	NULL	NULL	NULL	NULL	NULL	NULL	NULL	NULL	3	NULL	NULL	NULL	NULL	NULL	NULL	pra4	taskList2	高科技的	NULL	NULL	NULL	NULL	NULL	NULL	NULL
大创sc-iat	1	1	<?xml version="1.0"?>\n<Clock xmlns:dt="urn:schemas-microsoft-com:datatypes"><Description dt:dt="string">E-Prime Primary Realtime Clock</Description><StartTime><Timestamp dt:dt="int">0</Timestamp><DateUtc dt:dt="string">2021-10-21T10:44:38Z</DateUtc></StartTime><FrequencyChanges><FrequencyChange><Frequency dt:dt="r8">10000000</Frequency><Timestamp dt:dt="r8">17122103608621</Timestamp><Current dt:…	59.959	1.0.0.17	1	-1928908105	2.0.10.182	10-21-2021	2021-10-21 10:44:39	18:44:39	2.0.10.92	1	affpro	WordList	1	1	1	168	j	NULL	NULL	NULL	NULL	2	NULL	NULL	NULL	NULL	NULL	NULL	NULL	NULL	NULL	NULL	NULL	NULL	NULL	NULL	pra4	taskList2	抗虫害棉花	NULL	NULL	NULL	NULL	NULL	NULL	NULL
大创sc-iat	1	1	<?xml version="1.0"?>\n<Clock xmlns:dt="urn:schemas-microsoft-com:datatypes"><Description dt:dt="string">E-Prime Primary Realtime Clock</Description><StartTime><Timestamp dt:dt="int">0</Timestamp><DateUtc dt:dt="string">2021-10-21T10:44:38Z</DateUtc></StartTime><FrequencyChanges><FrequencyChange><Frequency dt:dt="r8">10000000</Frequency><Timestamp dt:dt="r8">17122103608621</Timestamp><Current dt:…	59.959	1.0.0.17	1	-1928908105	2.0.10.182	10-21-2021	2021-10-21 10:44:39	18:44:39	2.0.10.92	1	affpro	WordList	1	1	1	169	f	NULL	NULL	NULL	NULL	NULL	NULL	NULL	NULL	NULL	NULL	NULL	NULL	1	NULL	NULL	NULL	NULL	NULL	NULL	pra4	taskList2	科学的	NULL	NULL	NULL	NULL	NULL	NULL	NULL
大创sc-iat	1	1	<?xml version="1.0"?>\n<Clock xmlns:dt="urn:schemas-microsoft-com:datatypes"><Description dt:dt="string">E-Prime Primary Realtime Clock</Description><StartTime><Timestamp dt:dt="int">0</Timestamp><DateUtc dt:dt="string">2021-10-21T10:44:38Z</DateUtc></StartTime><FrequencyChanges><FrequencyChange><Frequency dt:dt="r8">10000000</Frequency><Timestamp dt:dt="r8">17122103608621</Timestamp><Current dt:…	59.959	1.0.0.17	1	-1928908105	2.0.10.182	10-21-2021	2021-10-21 10:44:39	18:44:39	2.0.10.92	1	affpro	WordList	1	1	1	170	j	NULL	NULL	NULL	NULL	NULL	NULL	NULL	NULL	1	NULL	NULL	NULL	NULL	NULL	NULL	NULL	NULL	NULL	NULL	pra4	taskList2	不成熟的	NULL	NULL	NULL	NULL	NULL	NULL	NULL
大创sc-iat	1	1	<?xml version="1.0"?>\n<Clock xmlns:dt="urn:schemas-microsoft-com:datatypes"><Description dt:dt="string">E-Prime Primary Realtime Clock</Description><StartTime><Timestamp dt:dt="int">0</Timestamp><DateUtc dt:dt="string">2021-10-21T10:44:38Z</DateUtc></StartTime><FrequencyChanges><FrequencyChange><Frequency dt:dt="r8">10000000</Frequency><Timestamp dt:dt="r8">17122103608621</Timestamp><Current dt:…	59.959	1.0.0.17	1	-1928908105	2.0.10.182	10-21-2021	2021-10-21 10:44:39	18:44:39	2.0.10.92	1	affpro	WordList	1	1	1	171	j	NULL	NULL	NULL	NULL	4	NULL	NULL	NULL	NULL	NULL	NULL	NULL	NULL	NULL	NULL	NULL	NULL	NULL	NULL	pra4	taskList2	动物转基因	NULL	NULL	NULL	NULL	NULL	NULL	NULL
大创sc-iat	1	1	<?xml version="1.0"?>\n<Clock xmlns:dt="urn:schemas-microsoft-com:datatypes"><Description dt:dt="string">E-Prime Primary Realtime Clock</Description><StartTime><Timestamp dt:dt="int">0</Timestamp><DateUtc dt:dt="string">2021-10-21T10:44:38Z</DateUtc></StartTime><FrequencyChanges><FrequencyChange><Frequency dt:dt="r8">10000000</Frequency><Timestamp dt:dt="r8">17122103608621</Timestamp><Current dt:…	59.959	1.0.0.17	1	-1928908105	2.0.10.182	10-21-2021	2021-10-21 10:44:39	18:44:39	2.0.10.92	1	affpro	WordList	1	1	1	172	f	NULL	NULL	NULL	NULL	NULL	NULL	NULL	NULL	NULL	NULL	NULL	NULL	4	NULL	NULL	NULL	NULL	NULL	NULL	pra4	taskList2	创新的	NULL	NULL	NULL	NULL	NULL	NULL	NULL
大创sc-iat	1	1	<?xml version="1.0"?>\n<Clock xmlns:dt="urn:schemas-microsoft-com:datatypes"><Description dt:dt="string">E-Prime Primary Realtime Clock</Description><StartTime><Timestamp dt:dt="int">0</Timestamp><DateUtc dt:dt="string">2021-10-21T10:44:38Z</DateUtc></StartTime><FrequencyChanges><FrequencyChange><Frequency dt:dt="r8">10000000</Frequency><Timestamp dt:dt="r8">17122103608621</Timestamp><Current dt:…	59.959	1.0.0.17	1	-1928908105	2.0.10.182	10-21-2021	2021-10-21 10:44:39	18:44:39	2.0.10.92	1	affpro	WordList	1	1	1	173	j	NULL	NULL	NULL	NULL	NULL	NULL	NULL	NULL	3	NULL	NULL	NULL	NULL	NULL	NULL	NULL	NULL	NULL	NULL	pra4	taskList2	非天然的	NULL	NULL	NULL	NULL	NULL	NULL	NULL
大创sc-iat	1	1	<?xml version="1.0"?>\n<Clock xmlns:dt="urn:schemas-microsoft-com:datatypes"><Description dt:dt="string">E-Prime Primary Realtime Clock</Description><StartTime><Timestamp dt:dt="int">0</Timestamp><DateUtc dt:dt="string">2021-10-21T10:44:38Z</DateUtc></StartTime><FrequencyChanges><FrequencyChange><Frequency dt:dt="r8">10000000</Frequency><Timestamp dt:dt="r8">17122103608621</Timestamp><Current dt:…	59.959	1.0.0.17	1	-1928908105	2.0.10.182	10-21-2021	2021-10-21 10:44:39	18:44:39	2.0.10.92	1	affpro	WordList	1	1	1	174	f	NULL	NULL	NULL	NULL	NULL	NULL	NULL	NULL	NULL	NULL	NULL	NULL	2	NULL	NULL	NULL	NULL	NULL	NULL	pra4	taskList2	高产的	NULL	NULL	NULL	NULL	NULL	NULL	NULL
大创sc-iat	1	1	<?xml version="1.0"?>\n<Clock xmlns:dt="urn:schemas-microsoft-com:datatypes"><Description dt:dt="string">E-Prime Primary Realtime Clock</Description><StartTime><Timestamp dt:dt="int">0</Timestamp><DateUtc dt:dt="string">2021-10-21T10:44:38Z</DateUtc></StartTime><FrequencyChanges><FrequencyChange><Frequency dt:dt="r8">10000000</Frequency><Timestamp dt:dt="r8">17122103608621</Timestamp><Current dt:…	59.959	1.0.0.17	1	-1928908105	2.0.10.182	10-21-2021	2021-10-21 10:44:39	18:44:39	2.0.10.92	1	affpro	WordList	1	1	1	175	f	NULL	NULL	NULL	NULL	NULL	NULL	NULL	NULL	NULL	NULL	NULL	NULL	3	NULL	NULL	NULL	NULL	NULL	NULL	pra4	taskList2	高科技的	NULL	NULL	NULL	NULL	NULL	NULL	NULL
大创sc-iat	1	1	<?xml version="1.0"?>\n<Clock xmlns:dt="urn:schemas-microsoft-com:datatypes"><Description dt:dt="string">E-Prime Primary Realtime Clock</Description><StartTime><Timestamp dt:dt="int">0</Timestamp><DateUtc dt:dt="string">2021-10-21T10:44:38Z</DateUtc></StartTime><FrequencyChanges><FrequencyChange><Frequency dt:dt="r8">10000000</Frequency><Timestamp dt:dt="r8">17122103608621</Timestamp><Current dt:…	59.959	1.0.0.17	1	-1928908105	2.0.10.182	10-21-2021	2021-10-21 10:44:39	18:44:39	2.0.10.92	1	affpro	WordList	1	1	1	176	j	NULL	NULL	NULL	NULL	2	NULL	NULL	NULL	NULL	NULL	NULL	NULL	NULL	NULL	NULL	NULL	NULL	NULL	NULL	pra4	taskList2	抗虫害棉花	NULL	NULL	NULL	NULL	NULL	NULL	NULL
大创sc-iat	1	1	<?xml version="1.0"?>\n<Clock xmlns:dt="urn:schemas-microsoft-com:datatypes"><Description dt:dt="string">E-Prime Primary Realtime Clock</Description><StartTime><Timestamp dt:dt="int">0</Timestamp><DateUtc dt:dt="string">2021-10-21T10:44:38Z</DateUtc></StartTime><FrequencyChanges><FrequencyChange><Frequency dt:dt="r8">10000000</Frequency><Timestamp dt:dt="r8">17122103608621</Timestamp><Current dt:…	59.959	1.0.0.17	1	-1928908105	2.0.10.182	10-21-2021	2021-10-21 10:44:39	18:44:39	2.0.10.92	1	affpro	WordList	1	1	1	177	f	NULL	NULL	NULL	NULL	NULL	NULL	NULL	NULL	NULL	NULL	NULL	NULL	4	NULL	NULL	NULL	NULL	NULL	NULL	pra4	taskList2	创新的	NULL	NULL	NULL	NULL	NULL	NULL	NULL
大创sc-iat	1	1	<?xml version="1.0"?>\n<Clock xmlns:dt="urn:schemas-microsoft-com:datatypes"><Description dt:dt="string">E-Prime Primary Realtime Clock</Description><StartTime><Timestamp dt:dt="int">0</Timestamp><DateUtc dt:dt="string">2021-10-21T10:44:38Z</DateUtc></StartTime><FrequencyChanges><FrequencyChange><Frequency dt:dt="r8">10000000</Frequency><Timestamp dt:dt="r8">17122103608621</Timestamp><Current dt:…	59.959	1.0.0.17	1	-1928908105	2.0.10.182	10-21-2021	2021-10-21 10:44:39	18:44:39	2.0.10.92	1	affpro	WordList	1	1	1	178	j	NULL	NULL	NULL	NULL	NULL	NULL	NULL	NULL	2	NULL	NULL	NULL	NULL	NULL	NULL	NULL	NULL	NULL	NULL	pra4	taskList2	高风险的	NULL	NULL	NULL	NULL	NULL	NULL	NULL
大创sc-iat	1	1	<?xml version="1.0"?>\n<Clock xmlns:dt="urn:schemas-microsoft-com:datatypes"><Description dt:dt="string">E-Prime Primary Realtime Clock</Description><StartTime><Timestamp dt:dt="int">0</Timestamp><DateUtc dt:dt="string">2021-10-21T10:44:38Z</DateUtc></StartTime><FrequencyChanges><FrequencyChange><Frequency dt:dt="r8">10000000</Frequency><Timestamp dt:dt="r8">17122103608621</Timestamp><Current dt:…	59.959	1.0.0.17	1	-1928908105	2.0.10.182	10-21-2021	2021-10-21 10:44:39	18:44:39	2.0.10.92	1	affpro	WordList	1	1	1	179	j	NULL	NULL	NULL	NULL	1	NULL	NULL	NULL	NULL	NULL	NULL	NULL	NULL	NULL	NULL	NULL	NULL	NULL	NULL	pra4	taskList2	转基因食物	NULL	NULL	NULL	NULL	NULL	NULL	NULL
大创sc-iat	1	1	<?xml version="1.0"?>\n<Clock xmlns:dt="urn:schemas-microsoft-com:datatypes"><Description dt:dt="string">E-Prime Primary Realtime Clock</Description><StartTime><Timestamp dt:dt="int">0</Timestamp><DateUtc dt:dt="string">2021-10-21T10:44:38Z</DateUtc></StartTime><FrequencyChanges><FrequencyChange><Frequency dt:dt="r8">10000000</Frequency><Timestamp dt:dt="r8">17122103608621</Timestamp><Current dt:…	59.959	1.0.0.17	1	-1928908105	2.0.10.182	10-21-2021	2021-10-21 10:44:39	18:44:39	2.0.10.92	1	affpro	WordList	1	1	1	180	f	NULL	NULL	NULL	NULL	NULL	NULL	NULL	NULL	NULL	NULL	NULL	NULL	3	NULL	NULL	NULL	NULL	NULL	NULL	pra4	taskList2	高科技的	NULL	NULL	NULL	NULL	NULL	NULL	NULL
大创sc-iat	1	1	<?xml version="1.0"?>\n<Clock xmlns:dt="urn:schemas-microsoft-com:datatypes"><Description dt:dt="string">E-Prime Primary Realtime Clock</Description><StartTime><Timestamp dt:dt="int">0</Timestamp><DateUtc dt:dt="string">2021-10-21T10:44:38Z</DateUtc></StartTime><FrequencyChanges><FrequencyChange><Frequency dt:dt="r8">10000000</Frequency><Timestamp dt:dt="r8">17122103608621</Timestamp><Current dt:…	59.959	1.0.0.17	1	-1928908105	2.0.10.182	10-21-2021	2021-10-21 10:44:39	18:44:39	2.0.10.92	1	affpro	WordList	1	1	1	181	j	NULL	NULL	NULL	NULL	3	NULL	NULL	NULL	NULL	NULL	NULL	NULL	NULL	NULL	NULL	NULL	NULL	NULL	NULL	pra4	taskList2	转基因大豆	NULL	NULL	NULL	NULL	NULL	NULL	NULL
大创sc-iat	1	1	<?xml version="1.0"?>\n<Clock xmlns:dt="urn:schemas-microsoft-com:datatypes"><Description dt:dt="string">E-Prime Primary Realtime Clock</Description><StartTime><Timestamp dt:dt="int">0</Timestamp><DateUtc dt:dt="string">2021-10-21T10:44:38Z</DateUtc></StartTime><FrequencyChanges><FrequencyChange><Frequency dt:dt="r8">10000000</Frequency><Timestamp dt:dt="r8">17122103608621</Timestamp><Current dt:…	59.959	1.0.0.17	1	-1928908105	2.0.10.182	10-21-2021	2021-10-21 10:44:39	18:44:39	2.0.10.92	1	affpro	WordList	1	1	1	182	f	NULL	NULL	NULL	NULL	NULL	NULL	NULL	NULL	NULL	NULL	NULL	NULL	2	NULL	NULL	NULL	NULL	NULL	NULL	pra4	taskList2	高产的	NULL	NULL	NULL	NULL	NULL	NULL	NULL
大创sc-iat	1	1	<?xml version="1.0"?>\n<Clock xmlns:dt="urn:schemas-microsoft-com:datatypes"><Description dt:dt="string">E-Prime Primary Realtime Clock</Description><StartTime><Timestamp dt:dt="int">0</Timestamp><DateUtc dt:dt="string">2021-10-21T10:44:38Z</DateUtc></StartTime><FrequencyChanges><FrequencyChange><Frequency dt:dt="r8">10000000</Frequency><Timestamp dt:dt="r8">17122103608621</Timestamp><Current dt:…	59.959	1.0.0.17	1	-1928908105	2.0.10.182	10-21-2021	2021-10-21 10:44:39	18:44:39	2.0.10.92	1	affpro	WordList	1	1	1	183	f	NULL	NULL	NULL	NULL	NULL	NULL	NULL	NULL	NULL	NULL	NULL	NULL	1	NULL	NULL	NULL	NULL	NULL	NULL	pra4	taskList2	科学的	NULL	NULL	NULL	NULL	NULL	NULL	NULL
大创sc-iat	1	1	<?xml version="1.0"?>\n<Clock xmlns:dt="urn:schemas-microsoft-com:datatypes"><Description dt:dt="string">E-Prime Primary Realtime Clock</Description><StartTime><Timestamp dt:dt="int">0</Timestamp><DateUtc dt:dt="string">2021-10-21T10:44:38Z</DateUtc></StartTime><FrequencyChanges><FrequencyChange><Frequency dt:dt="r8">10000000</Frequency><Timestamp dt:dt="r8">17122103608621</Timestamp><Current dt:…	59.959	1.0.0.17	1	-1928908105	2.0.10.182	10-21-2021	2021-10-21 10:44:39	18:44:39	2.0.10.92	1	affpro	WordList	1	1	1	184	j	NULL	NULL	NULL	NULL	NULL	NULL	NULL	NULL	4	NULL	NULL	NULL	NULL	NULL	NULL	NULL	NULL	NULL	NULL	pra4	taskList2	有争议的	NULL	NULL	NULL	NULL	NULL	NULL	NULL
大创sc-iat	1	1	<?xml version="1.0"?>\n<Clock xmlns:dt="urn:schemas-microsoft-com:datatypes"><Description dt:dt="string">E-Prime Primary Realtime Clock</Description><StartTime><Timestamp dt:dt="int">0</Timestamp><DateUtc dt:dt="string">2021-10-21T10:44:38Z</DateUtc></StartTime><FrequencyChanges><FrequencyChange><Frequency dt:dt="r8">10000000</Frequency><Timestamp dt:dt="r8">17122103608621</Timestamp><Current dt:…	59.959	1.0.0.17	1	-1928908105	2.0.10.182	10-21-2021	2021-10-21 10:44:39	18:44:39	2.0.10.92	1	affpro	WordList	1	1	1	185	f	NULL	NULL	NULL	NULL	NULL	NULL	NULL	NULL	NULL	NULL	NULL	NULL	3	NULL	NULL	NULL	NULL	NULL	NULL	pra4	taskList2	高科技的	NULL	NULL	NULL	NULL	NULL	NULL	NULL
大创sc-iat	1	1	<?xml version="1.0"?>\n<Clock xmlns:dt="urn:schemas-microsoft-com:datatypes"><Description dt:dt="string">E-Prime Primary Realtime Clock</Description><StartTime><Timestamp dt:dt="int">0</Timestamp><DateUtc dt:dt="string">2021-10-21T10:44:38Z</DateUtc></StartTime><FrequencyChanges><FrequencyChange><Frequency dt:dt="r8">10000000</Frequency><Timestamp dt:dt="r8">17122103608621</Timestamp><Current dt:…	59.959	1.0.0.17	1	-1928908105	2.0.10.182	10-21-2021	2021-10-21 10:44:39	18:44:39	2.0.10.92	1	affpro	WordList	1	1	1	186	j	NULL	NULL	NULL	NULL	NULL	NULL	NULL	NULL	3	NULL	NULL	NULL	NULL	NULL	NULL	NULL	NULL	NULL	NULL	pra4	taskList2	非天然的	NULL	NULL	NULL	NULL	NULL	NULL	NULL
大创sc-iat	1	1	<?xml version="1.0"?>\n<Clock xmlns:dt="urn:schemas-microsoft-com:datatypes"><Description dt:dt="string">E-Prime Primary Realtime Clock</Description><StartTime><Timestamp dt:dt="int">0</Timestamp><DateUtc dt:dt="string">2021-10-21T10:44:38Z</DateUtc></StartTime><FrequencyChanges><FrequencyChange><Frequency dt:dt="r8">10000000</Frequency><Timestamp dt:dt="r8">17122103608621</Timestamp><Current dt:…	59.959	1.0.0.17	1	-1928908105	2.0.10.182	10-21-2021	2021-10-21 10:44:39	18:44:39	2.0.10.92	1	affpro	WordList	1	1	1	187	f	NULL	NULL	NULL	NULL	NULL	NULL	NULL	NULL	NULL	NULL	NULL	NULL	4	NULL	NULL	NULL	NULL	NULL	NULL	pra4	taskList2	创新的	NULL	NULL	NULL	NULL	NULL	NULL	NULL
大创sc-iat	1	1	<?xml version="1.0"?>\n<Clock xmlns:dt="urn:schemas-microsoft-com:datatypes"><Description dt:dt="string">E-Prime Primary Realtime Clock</Description><StartTime><Timestamp dt:dt="int">0</Timestamp><DateUtc dt:dt="string">2021-10-21T10:44:38Z</DateUtc></StartTime><FrequencyChanges><FrequencyChange><Frequency dt:dt="r8">10000000</Frequency><Timestamp dt:dt="r8">17122103608621</Timestamp><Current dt:…	59.959	1.0.0.17	1	-1928908105	2.0.10.182	10-21-2021	2021-10-21 10:44:39	18:44:39	2.0.10.92	1	affpro	WordList	1	1	1	188	j	NULL	NULL	NULL	NULL	1	NULL	NULL	NULL	NULL	NULL	NULL	NULL	NULL	NULL	NULL	NULL	NULL	NULL	NULL	pra4	taskList2	转基因食物	NULL	NULL	NULL	NULL	NULL	NULL	NULL
大创sc-iat	1	1	<?xml version="1.0"?>\n<Clock xmlns:dt="urn:schemas-microsoft-com:datatypes"><Description dt:dt="string">E-Prime Primary Realtime Clock</Description><StartTime><Timestamp dt:dt="int">0</Timestamp><DateUtc dt:dt="string">2021-10-21T10:44:38Z</DateUtc></StartTime><FrequencyChanges><FrequencyChange><Frequency dt:dt="r8">10000000</Frequency><Timestamp dt:dt="r8">17122103608621</Timestamp><Current dt:…	59.959	1.0.0.17	1	-1928908105	2.0.10.182	10-21-2021	2021-10-21 10:44:39	18:44:39	2.0.10.92	1	affpro	WordList	1	1	1	189	f	NULL	NULL	NULL	NULL	NULL	NULL	NULL	NULL	NULL	NULL	NULL	NULL	1	NULL	NULL	NULL	NULL	NULL	NULL	pra4	taskList2	科学的	NULL	NULL	NULL	NULL	NULL	NULL	NULL
大创sc-iat	1	1	<?xml version="1.0"?>\n<Clock xmlns:dt="urn:schemas-microsoft-com:datatypes"><Description dt:dt="string">E-Prime Primary Realtime Clock</Description><StartTime><Timestamp dt:dt="int">0</Timestamp><DateUtc dt:dt="string">2021-10-21T10:44:38Z</DateUtc></StartTime><FrequencyChanges><FrequencyChange><Frequency dt:dt="r8">10000000</Frequency><Timestamp dt:dt="r8">17122103608621</Timestamp><Current dt:…	59.959	1.0.0.17	1	-1928908105	2.0.10.182	10-21-2021	2021-10-21 10:44:39	18:44:39	2.0.10.92	1	affpro	WordList	1	1	1	190	f	NULL	NULL	NULL	NULL	NULL	NULL	NULL	NULL	NULL	NULL	NULL	NULL	2	NULL	NULL	NULL	NULL	NULL	NULL	pra4	taskList2	高产的	NULL	NULL	NULL	NULL	NULL	NULL	NULL
大创sc-iat	1	1	<?xml version="1.0"?>\n<Clock xmlns:dt="urn:schemas-microsoft-com:datatypes"><Description dt:dt="string">E-Prime Primary Realtime Clock</Description><StartTime><Timestamp dt:dt="int">0</Timestamp><DateUtc dt:dt="string">2021-10-21T10:44:38Z</DateUtc></StartTime><FrequencyChanges><FrequencyChange><Frequency dt:dt="r8">10000000</Frequency><Timestamp dt:dt="r8">17122103608621</Timestamp><Current dt:…	59.959	1.0.0.17	1	-1928908105	2.0.10.182	10-21-2021	2021-10-21 10:44:39	18:44:39	2.0.10.92	1	affpro	WordList	1	1	1	191	j	NULL	NULL	NULL	NULL	NULL	NULL	NULL	NULL	1	NULL	NULL	NULL	NULL	NULL	NULL	NULL	NULL	NULL	NULL	pra4	taskList2	不成熟的	NULL	NULL	NULL	NULL	NULL	NULL	NULL
大创sc-iat	1	1	<?xml version="1.0"?>\n<Clock xmlns:dt="urn:schemas-microsoft-com:datatypes"><Description dt:dt="string">E-Prime Primary Realtime Clock</Description><StartTime><Timestamp dt:dt="int">0</Timestamp><DateUtc dt:dt="string">2021-10-21T10:44:38Z</DateUtc></StartTime><FrequencyChanges><FrequencyChange><Frequency dt:dt="r8">10000000</Frequency><Timestamp dt:dt="r8">17122103608621</Timestamp><Current dt:…	59.959	1.0.0.17	1	-1928908105	2.0.10.182	10-21-2021	2021-10-21 10:44:39	18:44:39	2.0.10.92	1	affpro	WordList	1	1	1	192	j	NULL	NULL	NULL	NULL	4	NULL	NULL	NULL	NULL	NULL	NULL	NULL	NULL	NULL	NULL	NULL	NULL	NULL	NULL	pra4	taskList2	动物转基因	NULL	NULL	NULL	NULL	NULL	NULL	NULL
大创sc-iat	2	1	<?xml version="1.0"?>\n<Clock xmlns:dt="urn:schemas-microsoft-com:datatypes"><Description dt:dt="string">E-Prime Primary Realtime Clock</Description><StartTime><Timestamp dt:dt="int">0</Timestamp><DateUtc dt:dt="string">2021-10-22T01:50:43Z</DateUtc></StartTime><FrequencyChanges><FrequencyChange><Frequency dt:dt="r8">10000000</Frequency><Timestamp dt:dt="r8">17665795465106</Timestamp><Current dt:…	59.96	1.0.0.17	1	596996450	2.0.10.182	10-22-2021	2021-10-22 01:50:44	09:50:44	2.0.10.92	1	affpro	WordList	1	1	1	1	j	NULL	NULL	NULL	NULL	NULL	4	NULL	NULL	NULL	NULL	NULL	NULL	NULL	3	1	1	NULL	NULL	NULL	pra1	practiceList1	有争议的	1	j	-999999	0	31183	0	j
大创sc-iat	2	1	<?xml version="1.0"?>\n<Clock xmlns:dt="urn:schemas-microsoft-com:datatypes"><Description dt:dt="string">E-Prime Primary Realtime Clock</Description><StartTime><Timestamp dt:dt="int">0</Timestamp><DateUtc dt:dt="string">2021-10-22T01:50:43Z</DateUtc></StartTime><FrequencyChanges><FrequencyChange><Frequency dt:dt="r8">10000000</Frequency><Timestamp dt:dt="r8">17665795465106</Timestamp><Current dt:…	59.96	1.0.0.17	1	596996450	2.0.10.182	10-22-2021	2021-10-22 01:50:44	09:50:44	2.0.10.92	1	affpro	WordList	1	1	1	2	j	NULL	NULL	NULL	NULL	NULL	2	NULL	NULL	NULL	NULL	NULL	NULL	NULL	3	1	2	NULL	NULL	NULL	pra1	practiceList1	高风险的	1	j	-999999	0	34135	0	j
大创sc-iat	2	1	<?xml version="1.0"?>\n<Clock xmlns:dt="urn:schemas-microsoft-com:datatypes"><Description dt:dt="string">E-Prime Primary Realtime Clock</Description><StartTime><Timestamp dt:dt="int">0</Timestamp><DateUtc dt:dt="string">2021-10-22T01:50:43Z</DateUtc></StartTime><FrequencyChanges><FrequencyChange><Frequency dt:dt="r8">10000000</Frequency><Timestamp dt:dt="r8">17665795465106</Timestamp><Current dt:…	59.96	1.0.0.17	1	596996450	2.0.10.182	10-22-2021	2021-10-22 01:50:44	09:50:44	2.0.10.92	1	affpro	WordList	1	1	1	3	f	NULL	NULL	NULL	NULL	NULL	NULL	NULL	NULL	NULL	3	NULL	NULL	NULL	2	1	3	NULL	NULL	NULL	pra1	practiceList1	高科技的	1	f	-999999	0	35686	0	f
大创sc-iat	2	1	<?xml version="1.0"?>\n<Clock xmlns:dt="urn:schemas-microsoft-com:datatypes"><Description dt:dt="string">E-Prime Primary Realtime Clock</Description><StartTime><Timestamp dt:dt="int">0</Timestamp><DateUtc dt:dt="string">2021-10-22T01:50:43Z</DateUtc></StartTime><FrequencyChanges><FrequencyChange><Frequency dt:dt="r8">10000000</Frequency><Timestamp dt:dt="r8">17665795465106</Timestamp><Current dt:…	59.96	1.0.0.17	1	596996450	2.0.10.182	10-22-2021	2021-10-22 01:50:44	09:50:44	2.0.10.92	1	affpro	WordList	1	1	1	4	f	NULL	2	NULL	NULL	NULL	NULL	NULL	NULL	NULL	NULL	NULL	NULL	NULL	1	1	4	NULL	NULL	NULL	pra1	practiceList1	抗虫害棉花	1	f	-999999	17	37170	0	f
大创sc-iat	2	1	<?xml version="1.0"?>\n<Clock xmlns:dt="urn:schemas-microsoft-com:datatypes"><Description dt:dt="string">E-Prime Primary Realtime Clock</Description><StartTime><Timestamp dt:dt="int">0</Timestamp><DateUtc dt:dt="string">2021-10-22T01:50:43Z</DateUtc></StartTime><FrequencyChanges><FrequencyChange><Frequency dt:dt="r8">10000000</Frequency><Timestamp dt:dt="r8">17665795465106</Timestamp><Current dt:…	59.96	1.0.0.17	1	596996450	2.0.10.182	10-22-2021	2021-10-22 01:50:44	09:50:44	2.0.10.92	1	affpro	WordList	1	1	1	5	j	NULL	NULL	NULL	NULL	NULL	1	NULL	NULL	NULL	NULL	NULL	NULL	NULL	3	2	5	NULL	NULL	NULL	pra1	practiceList1	不成熟的	1	j	-999999	0	38671	0	j
大创sc-iat	2	1	<?xml version="1.0"?>\n<Clock xmlns:dt="urn:schemas-microsoft-com:datatypes"><Description dt:dt="string">E-Prime Primary Realtime Clock</Description><StartTime><Timestamp dt:dt="int">0</Timestamp><DateUtc dt:dt="string">2021-10-22T01:50:43Z</DateUtc></StartTime><FrequencyChanges><FrequencyChange><Frequency dt:dt="r8">10000000</Frequency><Timestamp dt:dt="r8">17665795465106</Timestamp><Current dt:…	59.96	1.0.0.17	1	596996450	2.0.10.182	10-22-2021	2021-10-22 01:50:44	09:50:44	2.0.10.92	1	affpro	WordList	1	1	1	6	f	NULL	3	NULL	NULL	NULL	NULL	NULL	NULL	NULL	NULL	NULL	NULL	NULL	1	2	6	NULL	NULL	NULL	pra1	practiceList1	转基因大豆	0	f	-999999	1	40256	0	j
大创sc-iat	2	1	<?xml version="1.0"?>\n<Clock xmlns:dt="urn:schemas-microsoft-com:datatypes"><Description dt:dt="string">E-Prime Primary Realtime Clock</Description><StartTime><Timestamp dt:dt="int">0</Timestamp><DateUtc dt:dt="string">2021-10-22T01:50:43Z</DateUtc></StartTime><FrequencyChanges><FrequencyChange><Frequency dt:dt="r8">10000000</Frequency><Timestamp dt:dt="r8">17665795465106</Timestamp><Current dt:…	59.96	1.0.0.17	1	596996450	2.0.10.182	10-22-2021	2021-10-22 01:50:44	09:50:44	2.0.10.92	1	affpro	WordList	1	1	1	7	f	NULL	NULL	NULL	NULL	NULL	NULL	NULL	NULL	NULL	4	NULL	NULL	NULL	2	2	7	NULL	NULL	NULL	pra1	practiceList1	创新的	1	f	-999999	0	43775	0	f
大创sc-iat	2	1	<?xml version="1.0"?>\n<Clock xmlns:dt="urn:schemas-microsoft-com:datatypes"><Description dt:dt="string">E-Prime Primary Realtime Clock</Description><StartTime><Timestamp dt:dt="int">0</Timestamp><DateUtc dt:dt="string">2021-10-22T01:50:43Z</DateUtc></StartTime><FrequencyChanges><FrequencyChange><Frequency dt:dt="r8">10000000</Frequency><Timestamp dt:dt="r8">17665795465106</Timestamp><Current dt:…	59.96	1.0.0.17	1	596996450	2.0.10.182	10-22-2021	2021-10-22 01:50:44	09:50:44	2.0.10.92	1	affpro	WordList	1	1	1	8	j	NULL	NULL	NULL	NULL	NULL	3	NULL	NULL	NULL	NULL	NULL	NULL	NULL	3	2	8	NULL	NULL	NULL	pra1	practiceList1	非天然的	1	j	-999999	0	45693	0	j
大创sc-iat	2	1	<?xml version="1.0"?>\n<Clock xmlns:dt="urn:schemas-microsoft-com:datatypes"><Description dt:dt="string">E-Prime Primary Realtime Clock</Description><StartTime><Timestamp dt:dt="int">0</Timestamp><DateUtc dt:dt="string">2021-10-22T01:50:43Z</DateUtc></StartTime><FrequencyChanges><FrequencyChange><Frequency dt:dt="r8">10000000</Frequency><Timestamp dt:dt="r8">17665795465106</Timestamp><Current dt:…	59.96	1.0.0.17	1	596996450	2.0.10.182	10-22-2021	2021-10-22 01:50:44	09:50:44	2.0.10.92	1	affpro	WordList	1	1	1	9	f	NULL	4	NULL	NULL	NULL	NULL	NULL	NULL	NULL	NULL	NULL	NULL	NULL	1	3	9	NULL	NULL	NULL	pra1	practiceList1	动物转基因	0	f	-999999	17	49929	0	j
大创sc-iat	2	1	<?xml version="1.0"?>\n<Clock xmlns:dt="urn:schemas-microsoft-com:datatypes"><Description dt:dt="string">E-Prime Primary Realtime Clock</Description><StartTime><Timestamp dt:dt="int">0</Timestamp><DateUtc dt:dt="string">2021-10-22T01:50:43Z</DateUtc></StartTime><FrequencyChanges><FrequencyChange><Frequency dt:dt="r8">10000000</Frequency><Timestamp dt:dt="r8">17665795465106</Timestamp><Current dt:…	59.96	1.0.0.17	1	596996450	2.0.10.182	10-22-2021	2021-10-22 01:50:44	09:50:44	2.0.10.92	1	affpro	WordList	1	1	1	10	f	NULL	NULL	NULL	NULL	NULL	NULL	NULL	NULL	NULL	2	NULL	NULL	NULL	2	3	10	NULL	NULL	NULL	pra1	practiceList1	高产的	1	f	-999999	0	53598	0	f
大创sc-iat	2	1	<?xml version="1.0"?>\n<Clock xmlns:dt="urn:schemas-microsoft-com:datatypes"><Description dt:dt="string">E-Prime Primary Realtime Clock</Description><StartTime><Timestamp dt:dt="int">0</Timestamp><DateUtc dt:dt="string">2021-10-22T01:50:43Z</DateUtc></StartTime><FrequencyChanges><FrequencyChange><Frequency dt:dt="r8">10000000</Frequency><Timestamp dt:dt="r8">17665795465106</Timestamp><Current dt:…	59.96	1.0.0.17	1	596996450	2.0.10.182	10-22-2021	2021-10-22 01:50:44	09:50:44	2.0.10.92	1	affpro	WordList	1	1	1	11	j	NULL	NULL	NULL	NULL	NULL	4	NULL	NULL	NULL	NULL	NULL	NULL	NULL	3	3	11	NULL	NULL	NULL	pra1	practiceList1	有争议的	1	j	-999999	0	55299	0	j
大创sc-iat	2	1	<?xml version="1.0"?>\n<Clock xmlns:dt="urn:schemas-microsoft-com:datatypes"><Description dt:dt="string">E-Prime Primary Realtime Clock</Description><StartTime><Timestamp dt:dt="int">0</Timestamp><DateUtc dt:dt="string">2021-10-22T01:50:43Z</DateUtc></StartTime><FrequencyChanges><FrequencyChange><Frequency dt:dt="r8">10000000</Frequency><Timestamp dt:dt="r8">17665795465106</Timestamp><Current dt:…	59.96	1.0.0.17	1	596996450	2.0.10.182	10-22-2021	2021-10-22 01:50:44	09:50:44	2.0.10.92	1	affpro	WordList	1	1	1	12	j	NULL	NULL	NULL	NULL	NULL	2	NULL	NULL	NULL	NULL	NULL	NULL	NULL	3	3	12	NULL	NULL	NULL	pra1	practiceList1	高风险的	1	j	-999999	0	56817	0	j
大创sc-iat	2	1	<?xml version="1.0"?>\n<Clock xmlns:dt="urn:schemas-microsoft-com:datatypes"><Description dt:dt="string">E-Prime Primary Realtime Clock</Description><StartTime><Timestamp dt:dt="int">0</Timestamp><DateUtc dt:dt="string">2021-10-22T01:50:43Z</DateUtc></StartTime><FrequencyChanges><FrequencyChange><Frequency dt:dt="r8">10000000</Frequency><Timestamp dt:dt="r8">17665795465106</Timestamp><Current dt:…	59.96	1.0.0.17	1	596996450	2.0.10.182	10-22-2021	2021-10-22 01:50:44	09:50:44	2.0.10.92	1	affpro	WordList	1	1	1	13	f	NULL	1	NULL	NULL	NULL	NULL	NULL	NULL	NULL	NULL	NULL	NULL	NULL	1	4	13	NULL	NULL	NULL	pra1	practiceList1	转基因食物	1	f	-999999	0	59786	0	f
大创sc-iat	2	1	<?xml version="1.0"?>\n<Clock xmlns:dt="urn:schemas-microsoft-com:datatypes"><Description dt:dt="string">E-Prime Primary Realtime Clock</Description><StartTime><Timestamp dt:dt="int">0</Timestamp><DateUtc dt:dt="string">2021-10-22T01:50:43Z</DateUtc></StartTime><FrequencyChanges><FrequencyChange><Frequency dt:dt="r8">10000000</Frequency><Timestamp dt:dt="r8">17665795465106</Timestamp><Current dt:…	59.96	1.0.0.17	1	596996450	2.0.10.182	10-22-2021	2021-10-22 01:50:44	09:50:44	2.0.10.92	1	affpro	WordList	1	1	1	14	f	NULL	NULL	NULL	NULL	NULL	NULL	NULL	NULL	NULL	1	NULL	NULL	NULL	2	4	14	NULL	NULL	NULL	pra1	practiceList1	科学的	1	f	-999999	1	61921	0	f
大创sc-iat	2	1	<?xml version="1.0"?>\n<Clock xmlns:dt="urn:schemas-microsoft-com:datatypes"><Description dt:dt="string">E-Prime Primary Realtime Clock</Description><StartTime><Timestamp dt:dt="int">0</Timestamp><DateUtc dt:dt="string">2021-10-22T01:50:43Z</DateUtc></StartTime><FrequencyChanges><FrequencyChange><Frequency dt:dt="r8">10000000</Frequency><Timestamp dt:dt="r8">17665795465106</Timestamp><Current dt:…	59.96	1.0.0.17	1	596996450	2.0.10.182	10-22-2021	2021-10-22 01:50:44	09:50:44	2.0.10.92	1	affpro	WordList	1	1	1	15	j	NULL	NULL	NULL	NULL	NULL	3	NULL	NULL	NULL	NULL	NULL	NULL	NULL	3	4	15	NULL	NULL	NULL	pra1	practiceList1	非天然的	1	j	-999999	0	63338	0	j
大创sc-iat	2	1	<?xml version="1.0"?>\n<Clock xmlns:dt="urn:schemas-microsoft-com:datatypes"><Description dt:dt="string">E-Prime Primary Realtime Clock</Description><StartTime><Timestamp dt:dt="int">0</Timestamp><DateUtc dt:dt="string">2021-10-22T01:50:43Z</DateUtc></StartTime><FrequencyChanges><FrequencyChange><Frequency dt:dt="r8">10000000</Frequency><Timestamp dt:dt="r8">17665795465106</Timestamp><Current dt:…	59.96	1.0.0.17	1	596996450	2.0.10.182	10-22-2021	2021-10-22 01:50:44	09:50:44	2.0.10.92	1	affpro	WordList	1	1	1	16	j	NULL	NULL	NULL	NULL	NULL	1	NULL	NULL	NULL	NULL	NULL	NULL	NULL	3	4	16	NULL	NULL	NULL	pra1	practiceList1	不成熟的	1	j	-999999	0	66090	0	j
大创sc-iat	2	1	<?xml version="1.0"?>\n<Clock xmlns:dt="urn:schemas-microsoft-com:datatypes"><Description dt:dt="string">E-Prime Primary Realtime Clock</Description><StartTime><Timestamp dt:dt="int">0</Timestamp><DateUtc dt:dt="string">2021-10-22T01:50:43Z</DateUtc></StartTime><FrequencyChanges><FrequencyChange><Frequency dt:dt="r8">10000000</Frequency><Timestamp dt:dt="r8">17665795465106</Timestamp><Current dt:…	59.96	1.0.0.17	1	596996450	2.0.10.182	10-22-2021	2021-10-22 01:50:44	09:50:44	2.0.10.92	1	affpro	WordList	1	1	1	17	f	NULL	NULL	NULL	NULL	NULL	NULL	NULL	NULL	NULL	4	NULL	NULL	NULL	2	5	17	NULL	NULL	NULL	pra1	practiceList1	创新的	1	f	-999999	0	68258	0	f
大创sc-iat	2	1	<?xml version="1.0"?>\n<Clock xmlns:dt="urn:schemas-microsoft-com:datatypes"><Description dt:dt="string">E-Prime Primary Realtime Clock</Description><StartTime><Timestamp dt:dt="int">0</Timestamp><DateUtc dt:dt="string">2021-10-22T01:50:43Z</DateUtc></StartTime><FrequencyChanges><FrequencyChange><Frequency dt:dt="r8">10000000</Frequency><Timestamp dt:dt="r8">17665795465106</Timestamp><Current dt:…	59.96	1.0.0.17	1	596996450	2.0.10.182	10-22-2021	2021-10-22 01:50:44	09:50:44	2.0.10.92	1	affpro	WordList	1	1	1	18	j	NULL	NULL	NULL	NULL	NULL	2	NULL	NULL	NULL	NULL	NULL	NULL	NULL	3	5	18	NULL	NULL	NULL	pra1	practiceList1	高风险的	1	j	-999999	1	69693	0	j
大创sc-iat	2	1	<?xml version="1.0"?>\n<Clock xmlns:dt="urn:schemas-microsoft-com:datatypes"><Description dt:dt="string">E-Prime Primary Realtime Clock</Description><StartTime><Timestamp dt:dt="int">0</Timestamp><DateUtc dt:dt="string">2021-10-22T01:50:43Z</DateUtc></StartTime><FrequencyChanges><FrequencyChange><Frequency dt:dt="r8">10000000</Frequency><Timestamp dt:dt="r8">17665795465106</Timestamp><Current dt:…	59.96	1.0.0.17	1	596996450	2.0.10.182	10-22-2021	2021-10-22 01:50:44	09:50:44	2.0.10.92	1	affpro	WordList	1	1	1	19	j	NULL	NULL	NULL	NULL	NULL	4	NULL	NULL	NULL	NULL	NULL	NULL	NULL	3	5	19	NULL	NULL	NULL	pra1	practiceList1	有争议的	1	j	-999999	0	71327	0	j
大创sc-iat	2	1	<?xml version="1.0"?>\n<Clock xmlns:dt="urn:schemas-microsoft-com:datatypes"><Description dt:dt="string">E-Prime Primary Realtime Clock</Description><StartTime><Timestamp dt:dt="int">0</Timestamp><DateUtc dt:dt="string">2021-10-22T01:50:43Z</DateUtc></StartTime><FrequencyChanges><FrequencyChange><Frequency dt:dt="r8">10000000</Frequency><Timestamp dt:dt="r8">17665795465106</Timestamp><Current dt:…	59.96	1.0.0.17	1	596996450	2.0.10.182	10-22-2021	2021-10-22 01:50:44	09:50:44	2.0.10.92	1	affpro	WordList	1	1	1	20	f	NULL	4	NULL	NULL	NULL	NULL	NULL	NULL	NULL	NULL	NULL	NULL	NULL	1	5	20	NULL	NULL	NULL	pra1	practiceList1	动物转基因	1	f	-999999	0	72828	0	f
大创sc-iat	2	1	<?xml version="1.0"?>\n<Clock xmlns:dt="urn:schemas-microsoft-com:datatypes"><Description dt:dt="string">E-Prime Primary Realtime Clock</Description><StartTime><Timestamp dt:dt="int">0</Timestamp><DateUtc dt:dt="string">2021-10-22T01:50:43Z</DateUtc></StartTime><FrequencyChanges><FrequencyChange><Frequency dt:dt="r8">10000000</Frequency><Timestamp dt:dt="r8">17665795465106</Timestamp><Current dt:…	59.96	1.0.0.17	1	596996450	2.0.10.182	10-22-2021	2021-10-22 01:50:44	09:50:44	2.0.10.92	1	affpro	WordList	1	1	1	21	f	NULL	NULL	NULL	NULL	NULL	NULL	NULL	NULL	NULL	2	NULL	NULL	NULL	2	6	21	NULL	NULL	NULL	pra1	practiceList1	高产的	1	f	-999999	0	75430	0	f
大创sc-iat	2	1	<?xml version="1.0"?>\n<Clock xmlns:dt="urn:schemas-microsoft-com:datatypes"><Description dt:dt="string">E-Prime Primary Realtime Clock</Description><StartTime><Timestamp dt:dt="int">0</Timestamp><DateUtc dt:dt="string">2021-10-22T01:50:43Z</DateUtc></StartTime><FrequencyChanges><FrequencyChange><Frequency dt:dt="r8">10000000</Frequency><Timestamp dt:dt="r8">17665795465106</Timestamp><Current dt:…	59.96	1.0.0.17	1	596996450	2.0.10.182	10-22-2021	2021-10-22 01:50:44	09:50:44	2.0.10.92	1	affpro	WordList	1	1	1	22	j	NULL	NULL	NULL	NULL	NULL	1	NULL	NULL	NULL	NULL	NULL	NULL	NULL	3	6	22	NULL	NULL	NULL	pra1	practiceList1	不成熟的	1	j	-999999	0	78015	0	j
大创sc-iat	2	1	<?xml version="1.0"?>\n<Clock xmlns:dt="urn:schemas-microsoft-com:datatypes"><Description dt:dt="string">E-Prime Primary Realtime Clock</Description><StartTime><Timestamp dt:dt="int">0</Timestamp><DateUtc dt:dt="string">2021-10-22T01:50:43Z</DateUtc></StartTime><FrequencyChanges><FrequencyChange><Frequency dt:dt="r8">10000000</Frequency><Timestamp dt:dt="r8">17665795465106</Timestamp><Current dt:…	59.96	1.0.0.17	1	596996450	2.0.10.182	10-22-2021	2021-10-22 01:50:44	09:50:44	2.0.10.92	1	affpro	WordList	1	1	1	23	j	NULL	NULL	NULL	NULL	NULL	3	NULL	NULL	NULL	NULL	NULL	NULL	NULL	3	6	23	NULL	NULL	NULL	pra1	practiceList1	非天然的	1	j	-999999	0	79499	0	j
大创sc-iat	2	1	<?xml version="1.0"?>\n<Clock xmlns:dt="urn:schemas-microsoft-com:datatypes"><Description dt:dt="string">E-Prime Primary Realtime Clock</Description><StartTime><Timestamp dt:dt="int">0</Timestamp><DateUtc dt:dt="string">2021-10-22T01:50:43Z</DateUtc></StartTime><FrequencyChanges><FrequencyChange><Frequency dt:dt="r8">10000000</Frequency><Timestamp dt:dt="r8">17665795465106</Timestamp><Current dt:…	59.96	1.0.0.17	1	596996450	2.0.10.182	10-22-2021	2021-10-22 01:50:44	09:50:44	2.0.10.92	1	affpro	WordList	1	1	1	24	f	NULL	2	NULL	NULL	NULL	NULL	NULL	NULL	NULL	NULL	NULL	NULL	NULL	1	6	24	NULL	NULL	NULL	pra1	practiceList1	抗虫害棉花	1	f	-999999	0	82718	0	f
大创sc-iat	2	1	<?xml version="1.0"?>\n<Clock xmlns:dt="urn:schemas-microsoft-com:datatypes"><Description dt:dt="string">E-Prime Primary Realtime Clock</Description><StartTime><Timestamp dt:dt="int">0</Timestamp><DateUtc dt:dt="string">2021-10-22T01:50:43Z</DateUtc></StartTime><FrequencyChanges><FrequencyChange><Frequency dt:dt="r8">10000000</Frequency><Timestamp dt:dt="r8">17665795465106</Timestamp><Current dt:…	59.96	1.0.0.17	1	596996450	2.0.10.182	10-22-2021	2021-10-22 01:50:44	09:50:44	2.0.10.92	1	affpro	WordList	1	1	1	25	j	NULL	NULL	NULL	NULL	NULL	NULL	3	NULL	NULL	NULL	NULL	NULL	NULL	NULL	NULL	NULL	NULL	NULL	NULL	pra2	taskList1	非天然的	NULL	NULL	NULL	NULL	NULL	NULL	NULL
大创sc-iat	2	1	<?xml version="1.0"?>\n<Clock xmlns:dt="urn:schemas-microsoft-com:datatypes"><Description dt:dt="string">E-Prime Primary Realtime Clock</Description><StartTime><Timestamp dt:dt="int">0</Timestamp><DateUtc dt:dt="string">2021-10-22T01:50:43Z</DateUtc></StartTime><FrequencyChanges><FrequencyChange><Frequency dt:dt="r8">10000000</Frequency><Timestamp dt:dt="r8">17665795465106</Timestamp><Current dt:…	59.96	1.0.0.17	1	596996450	2.0.10.182	10-22-2021	2021-10-22 01:50:44	09:50:44	2.0.10.92	1	affpro	WordList	1	1	1	26	f	NULL	NULL	3	NULL	NULL	NULL	NULL	NULL	NULL	NULL	NULL	NULL	NULL	NULL	NULL	NULL	NULL	NULL	NULL	pra2	taskList1	转基因大豆	NULL	NULL	NULL	NULL	NULL	NULL	NULL
大创sc-iat	2	1	<?xml version="1.0"?>\n<Clock xmlns:dt="urn:schemas-microsoft-com:datatypes"><Description dt:dt="string">E-Prime Primary Realtime Clock</Description><StartTime><Timestamp dt:dt="int">0</Timestamp><DateUtc dt:dt="string">2021-10-22T01:50:43Z</DateUtc></StartTime><FrequencyChanges><FrequencyChange><Frequency dt:dt="r8">10000000</Frequency><Timestamp dt:dt="r8">17665795465106</Timestamp><Current dt:…	59.96	1.0.0.17	1	596996450	2.0.10.182	10-22-2021	2021-10-22 01:50:44	09:50:44	2.0.10.92	1	affpro	WordList	1	1	1	27	f	NULL	NULL	NULL	NULL	NULL	NULL	NULL	NULL	NULL	NULL	3	NULL	NULL	NULL	NULL	NULL	NULL	NULL	NULL	pra2	taskList1	高科技的	NULL	NULL	NULL	NULL	NULL	NULL	NULL
大创sc-iat	2	1	<?xml version="1.0"?>\n<Clock xmlns:dt="urn:schemas-microsoft-com:datatypes"><Description dt:dt="string">E-Prime Primary Realtime Clock</Description><StartTime><Timestamp dt:dt="int">0</Timestamp><DateUtc dt:dt="string">2021-10-22T01:50:43Z</DateUtc></StartTime><FrequencyChanges><FrequencyChange><Frequency dt:dt="r8">10000000</Frequency><Timestamp dt:dt="r8">17665795465106</Timestamp><Current dt:…	59.96	1.0.0.17	1	596996450	2.0.10.182	10-22-2021	2021-10-22 01:50:44	09:50:44	2.0.10.92	1	affpro	WordList	1	1	1	28	j	NULL	NULL	NULL	NULL	NULL	NULL	2	NULL	NULL	NULL	NULL	NULL	NULL	NULL	NULL	NULL	NULL	NULL	NULL	pra2	taskList1	高风险的	NULL	NULL	NULL	NULL	NULL	NULL	NULL
大创sc-iat	2	1	<?xml version="1.0"?>\n<Clock xmlns:dt="urn:schemas-microsoft-com:datatypes"><Description dt:dt="string">E-Prime Primary Realtime Clock</Description><StartTime><Timestamp dt:dt="int">0</Timestamp><DateUtc dt:dt="string">2021-10-22T01:50:43Z</DateUtc></StartTime><FrequencyChanges><FrequencyChange><Frequency dt:dt="r8">10000000</Frequency><Timestamp dt:dt="r8">17665795465106</Timestamp><Current dt:…	59.96	1.0.0.17	1	596996450	2.0.10.182	10-22-2021	2021-10-22 01:50:44	09:50:44	2.0.10.92	1	affpro	WordList	1	1	1	29	f	NULL	NULL	NULL	NULL	NULL	NULL	NULL	NULL	NULL	NULL	1	NULL	NULL	NULL	NULL	NULL	NULL	NULL	NULL	pra2	taskList1	科学的	NULL	NULL	NULL	NULL	NULL	NULL	NULL
大创sc-iat	2	1	<?xml version="1.0"?>\n<Clock xmlns:dt="urn:schemas-microsoft-com:datatypes"><Description dt:dt="string">E-Prime Primary Realtime Clock</Description><StartTime><Timestamp dt:dt="int">0</Timestamp><DateUtc dt:dt="string">2021-10-22T01:50:43Z</DateUtc></StartTime><FrequencyChanges><FrequencyChange><Frequency dt:dt="r8">10000000</Frequency><Timestamp dt:dt="r8">17665795465106</Timestamp><Current dt:…	59.96	1.0.0.17	1	596996450	2.0.10.182	10-22-2021	2021-10-22 01:50:44	09:50:44	2.0.10.92	1	affpro	WordList	1	1	1	30	j	NULL	NULL	NULL	NULL	NULL	NULL	1	NULL	NULL	NULL	NULL	NULL	NULL	NULL	NULL	NULL	NULL	NULL	NULL	pra2	taskList1	不成熟的	NULL	NULL	NULL	NULL	NULL	NULL	NULL
大创sc-iat	2	1	<?xml version="1.0"?>\n<Clock xmlns:dt="urn:schemas-microsoft-com:datatypes"><Description dt:dt="string">E-Prime Primary Realtime Clock</Description><StartTime><Timestamp dt:dt="int">0</Timestamp><DateUtc dt:dt="string">2021-10-22T01:50:43Z</DateUtc></StartTime><FrequencyChanges><FrequencyChange><Frequency dt:dt="r8">10000000</Frequency><Timestamp dt:dt="r8">17665795465106</Timestamp><Current dt:…	59.96	1.0.0.17	1	596996450	2.0.10.182	10-22-2021	2021-10-22 01:50:44	09:50:44	2.0.10.92	1	affpro	WordList	1	1	1	31	f	NULL	NULL	1	NULL	NULL	NULL	NULL	NULL	NULL	NULL	NULL	NULL	NULL	NULL	NULL	NULL	NULL	NULL	NULL	pra2	taskList1	转基因食物	NULL	NULL	NULL	NULL	NULL	NULL	NULL
大创sc-iat	2	1	<?xml version="1.0"?>\n<Clock xmlns:dt="urn:schemas-microsoft-com:datatypes"><Description dt:dt="string">E-Prime Primary Realtime Clock</Description><StartTime><Timestamp dt:dt="int">0</Timestamp><DateUtc dt:dt="string">2021-10-22T01:50:43Z</DateUtc></StartTime><FrequencyChanges><FrequencyChange><Frequency dt:dt="r8">10000000</Frequency><Timestamp dt:dt="r8">17665795465106</Timestamp><Current dt:…	59.96	1.0.0.17	1	596996450	2.0.10.182	10-22-2021	2021-10-22 01:50:44	09:50:44	2.0.10.92	1	affpro	WordList	1	1	1	32	j	NULL	NULL	NULL	NULL	NULL	NULL	4	NULL	NULL	NULL	NULL	NULL	NULL	NULL	NULL	NULL	NULL	NULL	NULL	pra2	taskList1	有争议的	NULL	NULL	NULL	NULL	NULL	NULL	NULL
大创sc-iat	2	1	<?xml version="1.0"?>\n<Clock xmlns:dt="urn:schemas-microsoft-com:datatypes"><Description dt:dt="string">E-Prime Primary Realtime Clock</Description><StartTime><Timestamp dt:dt="int">0</Timestamp><DateUtc dt:dt="string">2021-10-22T01:50:43Z</DateUtc></StartTime><FrequencyChanges><FrequencyChange><Frequency dt:dt="r8">10000000</Frequency><Timestamp dt:dt="r8">17665795465106</Timestamp><Current dt:…	59.96	1.0.0.17	1	596996450	2.0.10.182	10-22-2021	2021-10-22 01:50:44	09:50:44	2.0.10.92	1	affpro	WordList	1	1	1	33	f	NULL	NULL	NULL	NULL	NULL	NULL	NULL	NULL	NULL	NULL	2	NULL	NULL	NULL	NULL	NULL	NULL	NULL	NULL	pra2	taskList1	高产的	NULL	NULL	NULL	NULL	NULL	NULL	NULL
大创sc-iat	2	1	<?xml version="1.0"?>\n<Clock xmlns:dt="urn:schemas-microsoft-com:datatypes"><Description dt:dt="string">E-Prime Primary Realtime Clock</Description><StartTime><Timestamp dt:dt="int">0</Timestamp><DateUtc dt:dt="string">2021-10-22T01:50:43Z</DateUtc></StartTime><FrequencyChanges><FrequencyChange><Frequency dt:dt="r8">10000000</Frequency><Timestamp dt:dt="r8">17665795465106</Timestamp><Current dt:…	59.96	1.0.0.17	1	596996450	2.0.10.182	10-22-2021	2021-10-22 01:50:44	09:50:44	2.0.10.92	1	affpro	WordList	1	1	1	34	f	NULL	NULL	4	NULL	NULL	NULL	NULL	NULL	NULL	NULL	NULL	NULL	NULL	NULL	NULL	NULL	NULL	NULL	NULL	pra2	taskList1	动物转基因	NULL	NULL	NULL	NULL	NULL	NULL	NULL
大创sc-iat	2	1	<?xml version="1.0"?>\n<Clock xmlns:dt="urn:schemas-microsoft-com:datatypes"><Description dt:dt="string">E-Prime Primary Realtime Clock</Description><StartTime><Timestamp dt:dt="int">0</Timestamp><DateUtc dt:dt="string">2021-10-22T01:50:43Z</DateUtc></StartTime><FrequencyChanges><FrequencyChange><Frequency dt:dt="r8">10000000</Frequency><Timestamp dt:dt="r8">17665795465106</Timestamp><Current dt:…	59.96	1.0.0.17	1	596996450	2.0.10.182	10-22-2021	2021-10-22 01:50:44	09:50:44	2.0.10.92	1	affpro	WordList	1	1	1	35	j	NULL	NULL	NULL	NULL	NULL	NULL	3	NULL	NULL	NULL	NULL	NULL	NULL	NULL	NULL	NULL	NULL	NULL	NULL	pra2	taskList1	非天然的	NULL	NULL	NULL	NULL	NULL	NULL	NULL
大创sc-iat	2	1	<?xml version="1.0"?>\n<Clock xmlns:dt="urn:schemas-microsoft-com:datatypes"><Description dt:dt="string">E-Prime Primary Realtime Clock</Description><StartTime><Timestamp dt:dt="int">0</Timestamp><DateUtc dt:dt="string">2021-10-22T01:50:43Z</DateUtc></StartTime><FrequencyChanges><FrequencyChange><Frequency dt:dt="r8">10000000</Frequency><Timestamp dt:dt="r8">17665795465106</Timestamp><Current dt:…	59.96	1.0.0.17	1	596996450	2.0.10.182	10-22-2021	2021-10-22 01:50:44	09:50:44	2.0.10.92	1	affpro	WordList	1	1	1	36	j	NULL	NULL	NULL	NULL	NULL	NULL	1	NULL	NULL	NULL	NULL	NULL	NULL	NULL	NULL	NULL	NULL	NULL	NULL	pra2	taskList1	不成熟的	NULL	NULL	NULL	NULL	NULL	NULL	NULL
大创sc-iat	2	1	<?xml version="1.0"?>\n<Clock xmlns:dt="urn:schemas-microsoft-com:datatypes"><Description dt:dt="string">E-Prime Primary Realtime Clock</Description><StartTime><Timestamp dt:dt="int">0</Timestamp><DateUtc dt:dt="string">2021-10-22T01:50:43Z</DateUtc></StartTime><FrequencyChanges><FrequencyChange><Frequency dt:dt="r8">10000000</Frequency><Timestamp dt:dt="r8">17665795465106</Timestamp><Current dt:…	59.96	1.0.0.17	1	596996450	2.0.10.182	10-22-2021	2021-10-22 01:50:44	09:50:44	2.0.10.92	1	affpro	WordList	1	1	1	37	f	NULL	NULL	NULL	NULL	NULL	NULL	NULL	NULL	NULL	NULL	4	NULL	NULL	NULL	NULL	NULL	NULL	NULL	NULL	pra2	taskList1	创新的	NULL	NULL	NULL	NULL	NULL	NULL	NULL
大创sc-iat	2	1	<?xml version="1.0"?>\n<Clock xmlns:dt="urn:schemas-microsoft-com:datatypes"><Description dt:dt="string">E-Prime Primary Realtime Clock</Description><StartTime><Timestamp dt:dt="int">0</Timestamp><DateUtc dt:dt="string">2021-10-22T01:50:43Z</DateUtc></StartTime><FrequencyChanges><FrequencyChange><Frequency dt:dt="r8">10000000</Frequency><Timestamp dt:dt="r8">17665795465106</Timestamp><Current dt:…	59.96	1.0.0.17	1	596996450	2.0.10.182	10-22-2021	2021-10-22 01:50:44	09:50:44	2.0.10.92	1	affpro	WordList	1	1	1	38	f	NULL	NULL	2	NULL	NULL	NULL	NULL	NULL	NULL	NULL	NULL	NULL	NULL	NULL	NULL	NULL	NULL	NULL	NULL	pra2	taskList1	抗虫害棉花	NULL	NULL	NULL	NULL	NULL	NULL	NULL
大创sc-iat	2	1	<?xml version="1.0"?>\n<Clock xmlns:dt="urn:schemas-microsoft-com:datatypes"><Description dt:dt="string">E-Prime Primary Realtime Clock</Description><StartTime><Timestamp dt:dt="int">0</Timestamp><DateUtc dt:dt="string">2021-10-22T01:50:43Z</DateUtc></StartTime><FrequencyChanges><FrequencyChange><Frequency dt:dt="r8">10000000</Frequency><Timestamp dt:dt="r8">17665795465106</Timestamp><Current dt:…	59.96	1.0.0.17	1	596996450	2.0.10.182	10-22-2021	2021-10-22 01:50:44	09:50:44	2.0.10.92	1	affpro	WordList	1	1	1	39	j	NULL	NULL	NULL	NULL	NULL	NULL	2	NULL	NULL	NULL	NULL	NULL	NULL	NULL	NULL	NULL	NULL	NULL	NULL	pra2	taskList1	高风险的	NULL	NULL	NULL	NULL	NULL	NULL	NULL
大创sc-iat	2	1	<?xml version="1.0"?>\n<Clock xmlns:dt="urn:schemas-microsoft-com:datatypes"><Description dt:dt="string">E-Prime Primary Realtime Clock</Description><StartTime><Timestamp dt:dt="int">0</Timestamp><DateUtc dt:dt="string">2021-10-22T01:50:43Z</DateUtc></StartTime><FrequencyChanges><FrequencyChange><Frequency dt:dt="r8">10000000</Frequency><Timestamp dt:dt="r8">17665795465106</Timestamp><Current dt:…	59.96	1.0.0.17	1	596996450	2.0.10.182	10-22-2021	2021-10-22 01:50:44	09:50:44	2.0.10.92	1	affpro	WordList	1	1	1	40	j	NULL	NULL	NULL	NULL	NULL	NULL	4	NULL	NULL	NULL	NULL	NULL	NULL	NULL	NULL	NULL	NULL	NULL	NULL	pra2	taskList1	有争议的	NULL	NULL	NULL	NULL	NULL	NULL	NULL
大创sc-iat	2	1	<?xml version="1.0"?>\n<Clock xmlns:dt="urn:schemas-microsoft-com:datatypes"><Description dt:dt="string">E-Prime Primary Realtime Clock</Description><StartTime><Timestamp dt:dt="int">0</Timestamp><DateUtc dt:dt="string">2021-10-22T01:50:43Z</DateUtc></StartTime><FrequencyChanges><FrequencyChange><Frequency dt:dt="r8">10000000</Frequency><Timestamp dt:dt="r8">17665795465106</Timestamp><Current dt:…	59.96	1.0.0.17	1	596996450	2.0.10.182	10-22-2021	2021-10-22 01:50:44	09:50:44	2.0.10.92	1	affpro	WordList	1	1	1	41	f	NULL	NULL	1	NULL	NULL	NULL	NULL	NULL	NULL	NULL	NULL	NULL	NULL	NULL	NULL	NULL	NULL	NULL	NULL	pra2	taskList1	转基因食物	NULL	NULL	NULL	NULL	NULL	NULL	NULL
大创sc-iat	2	1	<?xml version="1.0"?>\n<Clock xmlns:dt="urn:schemas-microsoft-com:datatypes"><Description dt:dt="string">E-Prime Primary Realtime Clock</Description><StartTime><Timestamp dt:dt="int">0</Timestamp><DateUtc dt:dt="string">2021-10-22T01:50:43Z</DateUtc></StartTime><FrequencyChanges><FrequencyChange><Frequency dt:dt="r8">10000000</Frequency><Timestamp dt:dt="r8">17665795465106</Timestamp><Current dt:…	59.96	1.0.0.17	1	596996450	2.0.10.182	10-22-2021	2021-10-22 01:50:44	09:50:44	2.0.10.92	1	affpro	WordList	1	1	1	42	f	NULL	NULL	NULL	NULL	NULL	NULL	NULL	NULL	NULL	NULL	1	NULL	NULL	NULL	NULL	NULL	NULL	NULL	NULL	pra2	taskList1	科学的	NULL	NULL	NULL	NULL	NULL	NULL	NULL
大创sc-iat	2	1	<?xml version="1.0"?>\n<Clock xmlns:dt="urn:schemas-microsoft-com:datatypes"><Description dt:dt="string">E-Prime Primary Realtime Clock</Description><StartTime><Timestamp dt:dt="int">0</Timestamp><DateUtc dt:dt="string">2021-10-22T01:50:43Z</DateUtc></StartTime><FrequencyChanges><FrequencyChange><Frequency dt:dt="r8">10000000</Frequency><Timestamp dt:dt="r8">17665795465106</Timestamp><Current dt:…	59.96	1.0.0.17	1	596996450	2.0.10.182	10-22-2021	2021-10-22 01:50:44	09:50:44	2.0.10.92	1	affpro	WordList	1	1	1	43	j	NULL	NULL	NULL	NULL	NULL	NULL	1	NULL	NULL	NULL	NULL	NULL	NULL	NULL	NULL	NULL	NULL	NULL	NULL	pra2	taskList1	不成熟的	NULL	NULL	NULL	NULL	NULL	NULL	NULL
大创sc-iat	2	1	<?xml version="1.0"?>\n<Clock xmlns:dt="urn:schemas-microsoft-com:datatypes"><Description dt:dt="string">E-Prime Primary Realtime Clock</Description><StartTime><Timestamp dt:dt="int">0</Timestamp><DateUtc dt:dt="string">2021-10-22T01:50:43Z</DateUtc></StartTime><FrequencyChanges><FrequencyChange><Frequency dt:dt="r8">10000000</Frequency><Timestamp dt:dt="r8">17665795465106</Timestamp><Current dt:…	59.96	1.0.0.17	1	596996450	2.0.10.182	10-22-2021	2021-10-22 01:50:44	09:50:44	2.0.10.92	1	affpro	WordList	1	1	1	44	j	NULL	NULL	NULL	NULL	NULL	NULL	4	NULL	NULL	NULL	NULL	NULL	NULL	NULL	NULL	NULL	NULL	NULL	NULL	pra2	taskList1	有争议的	NULL	NULL	NULL	NULL	NULL	NULL	NULL
大创sc-iat	2	1	<?xml version="1.0"?>\n<Clock xmlns:dt="urn:schemas-microsoft-com:datatypes"><Description dt:dt="string">E-Prime Primary Realtime Clock</Description><StartTime><Timestamp dt:dt="int">0</Timestamp><DateUtc dt:dt="string">2021-10-22T01:50:43Z</DateUtc></StartTime><FrequencyChanges><FrequencyChange><Frequency dt:dt="r8">10000000</Frequency><Timestamp dt:dt="r8">17665795465106</Timestamp><Current dt:…	59.96	1.0.0.17	1	596996450	2.0.10.182	10-22-2021	2021-10-22 01:50:44	09:50:44	2.0.10.92	1	affpro	WordList	1	1	1	45	f	NULL	NULL	NULL	NULL	NULL	NULL	NULL	NULL	NULL	NULL	4	NULL	NULL	NULL	NULL	NULL	NULL	NULL	NULL	pra2	taskList1	创新的	NULL	NULL	NULL	NULL	NULL	NULL	NULL
大创sc-iat	2	1	<?xml version="1.0"?>\n<Clock xmlns:dt="urn:schemas-microsoft-com:datatypes"><Description dt:dt="string">E-Prime Primary Realtime Clock</Description><StartTime><Timestamp dt:dt="int">0</Timestamp><DateUtc dt:dt="string">2021-10-22T01:50:43Z</DateUtc></StartTime><FrequencyChanges><FrequencyChange><Frequency dt:dt="r8">10000000</Frequency><Timestamp dt:dt="r8">17665795465106</Timestamp><Current dt:…	59.96	1.0.0.17	1	596996450	2.0.10.182	10-22-2021	2021-10-22 01:50:44	09:50:44	2.0.10.92	1	affpro	WordList	1	1	1	46	f	NULL	NULL	3	NULL	NULL	NULL	NULL	NULL	NULL	NULL	NULL	NULL	NULL	NULL	NULL	NULL	NULL	NULL	NULL	pra2	taskList1	转基因大豆	NULL	NULL	NULL	NULL	NULL	NULL	NULL
大创sc-iat	2	1	<?xml version="1.0"?>\n<Clock xmlns:dt="urn:schemas-microsoft-com:datatypes"><Description dt:dt="string">E-Prime Primary Realtime Clock</Description><StartTime><Timestamp dt:dt="int">0</Timestamp><DateUtc dt:dt="string">2021-10-22T01:50:43Z</DateUtc></StartTime><FrequencyChanges><FrequencyChange><Frequency dt:dt="r8">10000000</Frequency><Timestamp dt:dt="r8">17665795465106</Timestamp><Current dt:…	59.96	1.0.0.17	1	596996450	2.0.10.182	10-22-2021	2021-10-22 01:50:44	09:50:44	2.0.10.92	1	affpro	WordList	1	1	1	47	j	NULL	NULL	NULL	NULL	NULL	NULL	2	NULL	NULL	NULL	NULL	NULL	NULL	NULL	NULL	NULL	NULL	NULL	NULL	pra2	taskList1	高风险的	NULL	NULL	NULL	NULL	NULL	NULL	NULL
大创sc-iat	2	1	<?xml version="1.0"?>\n<Clock xmlns:dt="urn:schemas-microsoft-com:datatypes"><Description dt:dt="string">E-Prime Primary Realtime Clock</Description><StartTime><Timestamp dt:dt="int">0</Timestamp><DateUtc dt:dt="string">2021-10-22T01:50:43Z</DateUtc></StartTime><FrequencyChanges><FrequencyChange><Frequency dt:dt="r8">10000000</Frequency><Timestamp dt:dt="r8">17665795465106</Timestamp><Current dt:…	59.96	1.0.0.17	1	596996450	2.0.10.182	10-22-2021	2021-10-22 01:50:44	09:50:44	2.0.10.92	1	affpro	WordList	1	1	1	48	j	NULL	NULL	NULL	NULL	NULL	NULL	3	NULL	NULL	NULL	NULL	NULL	NULL	NULL	NULL	NULL	NULL	NULL	NULL	pra2	taskList1	非天然的	NULL	NULL	NULL	NULL	NULL	NULL	NULL
大创sc-iat	2	1	<?xml version="1.0"?>\n<Clock xmlns:dt="urn:schemas-microsoft-com:datatypes"><Description dt:dt="string">E-Prime Primary Realtime Clock</Description><StartTime><Timestamp dt:dt="int">0</Timestamp><DateUtc dt:dt="string">2021-10-22T01:50:43Z</DateUtc></StartTime><FrequencyChanges><FrequencyChange><Frequency dt:dt="r8">10000000</Frequency><Timestamp dt:dt="r8">17665795465106</Timestamp><Current dt:…	59.96	1.0.0.17	1	596996450	2.0.10.182	10-22-2021	2021-10-22 01:50:44	09:50:44	2.0.10.92	1	affpro	WordList	1	1	1	49	f	NULL	NULL	2	NULL	NULL	NULL	NULL	NULL	NULL	NULL	NULL	NULL	NULL	NULL	NULL	NULL	NULL	NULL	NULL	pra2	taskList1	抗虫害棉花	NULL	NULL	NULL	NULL	NULL	NULL	NULL
大创sc-iat	2	1	<?xml version="1.0"?>\n<Clock xmlns:dt="urn:schemas-microsoft-com:datatypes"><Description dt:dt="string">E-Prime Primary Realtime Clock</Description><StartTime><Timestamp dt:dt="int">0</Timestamp><DateUtc dt:dt="string">2021-10-22T01:50:43Z</DateUtc></StartTime><FrequencyChanges><FrequencyChange><Frequency dt:dt="r8">10000000</Frequency><Timestamp dt:dt="r8">17665795465106</Timestamp><Current dt:…	59.96	1.0.0.17	1	596996450	2.0.10.182	10-22-2021	2021-10-22 01:50:44	09:50:44	2.0.10.92	1	affpro	WordList	1	1	1	50	j	NULL	NULL	NULL	NULL	NULL	NULL	2	NULL	NULL	NULL	NULL	NULL	NULL	NULL	NULL	NULL	NULL	NULL	NULL	pra2	taskList1	高风险的	NULL	NULL	NULL	NULL	NULL	NULL	NULL
大创sc-iat	2	1	<?xml version="1.0"?>\n<Clock xmlns:dt="urn:schemas-microsoft-com:datatypes"><Description dt:dt="string">E-Prime Primary Realtime Clock</Description><StartTime><Timestamp dt:dt="int">0</Timestamp><DateUtc dt:dt="string">2021-10-22T01:50:43Z</DateUtc></StartTime><FrequencyChanges><FrequencyChange><Frequency dt:dt="r8">10000000</Frequency><Timestamp dt:dt="r8">17665795465106</Timestamp><Current dt:…	59.96	1.0.0.17	1	596996450	2.0.10.182	10-22-2021	2021-10-22 01:50:44	09:50:44	2.0.10.92	1	affpro	WordList	1	1	1	51	j	NULL	NULL	NULL	NULL	NULL	NULL	4	NULL	NULL	NULL	NULL	NULL	NULL	NULL	NULL	NULL	NULL	NULL	NULL	pra2	taskList1	有争议的	NULL	NULL	NULL	NULL	NULL	NULL	NULL
大创sc-iat	2	1	<?xml version="1.0"?>\n<Clock xmlns:dt="urn:schemas-microsoft-com:datatypes"><Description dt:dt="string">E-Prime Primary Realtime Clock</Description><StartTime><Timestamp dt:dt="int">0</Timestamp><DateUtc dt:dt="string">2021-10-22T01:50:43Z</DateUtc></StartTime><FrequencyChanges><FrequencyChange><Frequency dt:dt="r8">10000000</Frequency><Timestamp dt:dt="r8">17665795465106</Timestamp><Current dt:…	59.96	1.0.0.17	1	596996450	2.0.10.182	10-22-2021	2021-10-22 01:50:44	09:50:44	2.0.10.92	1	affpro	WordList	1	1	1	52	f	NULL	NULL	NULL	NULL	NULL	NULL	NULL	NULL	NULL	NULL	3	NULL	NULL	NULL	NULL	NULL	NULL	NULL	NULL	pra2	taskList1	高科技的	NULL	NULL	NULL	NULL	NULL	NULL	NULL
大创sc-iat	2	1	<?xml version="1.0"?>\n<Clock xmlns:dt="urn:schemas-microsoft-com:datatypes"><Description dt:dt="string">E-Prime Primary Realtime Clock</Description><StartTime><Timestamp dt:dt="int">0</Timestamp><DateUtc dt:dt="string">2021-10-22T01:50:43Z</DateUtc></StartTime><FrequencyChanges><FrequencyChange><Frequency dt:dt="r8">10000000</Frequency><Timestamp dt:dt="r8">17665795465106</Timestamp><Current dt:…	59.96	1.0.0.17	1	596996450	2.0.10.182	10-22-2021	2021-10-22 01:50:44	09:50:44	2.0.10.92	1	affpro	WordList	1	1	1	53	f	NULL	NULL	4	NULL	NULL	NULL	NULL	NULL	NULL	NULL	NULL	NULL	NULL	NULL	NULL	NULL	NULL	NULL	NULL	pra2	taskList1	动物转基因	NULL	NULL	NULL	NULL	NULL	NULL	NULL
大创sc-iat	2	1	<?xml version="1.0"?>\n<Clock xmlns:dt="urn:schemas-microsoft-com:datatypes"><Description dt:dt="string">E-Prime Primary Realtime Clock</Description><StartTime><Timestamp dt:dt="int">0</Timestamp><DateUtc dt:dt="string">2021-10-22T01:50:43Z</DateUtc></StartTime><FrequencyChanges><FrequencyChange><Frequency dt:dt="r8">10000000</Frequency><Timestamp dt:dt="r8">17665795465106</Timestamp><Current dt:…	59.96	1.0.0.17	1	596996450	2.0.10.182	10-22-2021	2021-10-22 01:50:44	09:50:44	2.0.10.92	1	affpro	WordList	1	1	1	54	f	NULL	NULL	NULL	NULL	NULL	NULL	NULL	NULL	NULL	NULL	2	NULL	NULL	NULL	NULL	NULL	NULL	NULL	NULL	pra2	taskList1	高产的	NULL	NULL	NULL	NULL	NULL	NULL	NULL
大创sc-iat	2	1	<?xml version="1.0"?>\n<Clock xmlns:dt="urn:schemas-microsoft-com:datatypes"><Description dt:dt="string">E-Prime Primary Realtime Clock</Description><StartTime><Timestamp dt:dt="int">0</Timestamp><DateUtc dt:dt="string">2021-10-22T01:50:43Z</DateUtc></StartTime><FrequencyChanges><FrequencyChange><Frequency dt:dt="r8">10000000</Frequency><Timestamp dt:dt="r8">17665795465106</Timestamp><Current dt:…	59.96	1.0.0.17	1	596996450	2.0.10.182	10-22-2021	2021-10-22 01:50:44	09:50:44	2.0.10.92	1	affpro	WordList	1	1	1	55	j	NULL	NULL	NULL	NULL	NULL	NULL	1	NULL	NULL	NULL	NULL	NULL	NULL	NULL	NULL	NULL	NULL	NULL	NULL	pra2	taskList1	不成熟的	NULL	NULL	NULL	NULL	NULL	NULL	NULL
大创sc-iat	2	1	<?xml version="1.0"?>\n<Clock xmlns:dt="urn:schemas-microsoft-com:datatypes"><Description dt:dt="string">E-Prime Primary Realtime Clock</Description><StartTime><Timestamp dt:dt="int">0</Timestamp><DateUtc dt:dt="string">2021-10-22T01:50:43Z</DateUtc></StartTime><FrequencyChanges><FrequencyChange><Frequency dt:dt="r8">10000000</Frequency><Timestamp dt:dt="r8">17665795465106</Timestamp><Current dt:…	59.96	1.0.0.17	1	596996450	2.0.10.182	10-22-2021	2021-10-22 01:50:44	09:50:44	2.0.10.92	1	affpro	WordList	1	1	1	56	j	NULL	NULL	NULL	NULL	NULL	NULL	3	NULL	NULL	NULL	NULL	NULL	NULL	NULL	NULL	NULL	NULL	NULL	NULL	pra2	taskList1	非天然的	NULL	NULL	NULL	NULL	NULL	NULL	NULL
大创sc-iat	2	1	<?xml version="1.0"?>\n<Clock xmlns:dt="urn:schemas-microsoft-com:datatypes"><Description dt:dt="string">E-Prime Primary Realtime Clock</Description><StartTime><Timestamp dt:dt="int">0</Timestamp><DateUtc dt:dt="string">2021-10-22T01:50:43Z</DateUtc></StartTime><FrequencyChanges><FrequencyChange><Frequency dt:dt="r8">10000000</Frequency><Timestamp dt:dt="r8">17665795465106</Timestamp><Current dt:…	59.96	1.0.0.17	1	596996450	2.0.10.182	10-22-2021	2021-10-22 01:50:44	09:50:44	2.0.10.92	1	affpro	WordList	1	1	1	57	f	NULL	NULL	NULL	NULL	NULL	NULL	NULL	NULL	NULL	NULL	4	NULL	NULL	NULL	NULL	NULL	NULL	NULL	NULL	pra2	taskList1	创新的	NULL	NULL	NULL	NULL	NULL	NULL	NULL
大创sc-iat	2	1	<?xml version="1.0"?>\n<Clock xmlns:dt="urn:schemas-microsoft-com:datatypes"><Description dt:dt="string">E-Prime Primary Realtime Clock</Description><StartTime><Timestamp dt:dt="int">0</Timestamp><DateUtc dt:dt="string">2021-10-22T01:50:43Z</DateUtc></StartTime><FrequencyChanges><FrequencyChange><Frequency dt:dt="r8">10000000</Frequency><Timestamp dt:dt="r8">17665795465106</Timestamp><Current dt:…	59.96	1.0.0.17	1	596996450	2.0.10.182	10-22-2021	2021-10-22 01:50:44	09:50:44	2.0.10.92	1	affpro	WordList	1	1	1	58	j	NULL	NULL	NULL	NULL	NULL	NULL	2	NULL	NULL	NULL	NULL	NULL	NULL	NULL	NULL	NULL	NULL	NULL	NULL	pra2	taskList1	高风险的	NULL	NULL	NULL	NULL	NULL	NULL	NULL
大创sc-iat	2	1	<?xml version="1.0"?>\n<Clock xmlns:dt="urn:schemas-microsoft-com:datatypes"><Description dt:dt="string">E-Prime Primary Realtime Clock</Description><StartTime><Timestamp dt:dt="int">0</Timestamp><DateUtc dt:dt="string">2021-10-22T01:50:43Z</DateUtc></StartTime><FrequencyChanges><FrequencyChange><Frequency dt:dt="r8">10000000</Frequency><Timestamp dt:dt="r8">17665795465106</Timestamp><Current dt:…	59.96	1.0.0.17	1	596996450	2.0.10.182	10-22-2021	2021-10-22 01:50:44	09:50:44	2.0.10.92	1	affpro	WordList	1	1	1	59	j	NULL	NULL	NULL	NULL	NULL	NULL	3	NULL	NULL	NULL	NULL	NULL	NULL	NULL	NULL	NULL	NULL	NULL	NULL	pra2	taskList1	非天然的	NULL	NULL	NULL	NULL	NULL	NULL	NULL
大创sc-iat	2	1	<?xml version="1.0"?>\n<Clock xmlns:dt="urn:schemas-microsoft-com:datatypes"><Description dt:dt="string">E-Prime Primary Realtime Clock</Description><StartTime><Timestamp dt:dt="int">0</Timestamp><DateUtc dt:dt="string">2021-10-22T01:50:43Z</DateUtc></StartTime><FrequencyChanges><FrequencyChange><Frequency dt:dt="r8">10000000</Frequency><Timestamp dt:dt="r8">17665795465106</Timestamp><Current dt:…	59.96	1.0.0.17	1	596996450	2.0.10.182	10-22-2021	2021-10-22 01:50:44	09:50:44	2.0.10.92	1	affpro	WordList	1	1	1	60	f	NULL	NULL	3	NULL	NULL	NULL	NULL	NULL	NULL	NULL	NULL	NULL	NULL	NULL	NULL	NULL	NULL	NULL	NULL	pra2	taskList1	转基因大豆	NULL	NULL	NULL	NULL	NULL	NULL	NULL
大创sc-iat	2	1	<?xml version="1.0"?>\n<Clock xmlns:dt="urn:schemas-microsoft-com:datatypes"><Description dt:dt="string">E-Prime Primary Realtime Clock</Description><StartTime><Timestamp dt:dt="int">0</Timestamp><DateUtc dt:dt="string">2021-10-22T01:50:43Z</DateUtc></StartTime><FrequencyChanges><FrequencyChange><Frequency dt:dt="r8">10000000</Frequency><Timestamp dt:dt="r8">17665795465106</Timestamp><Current dt:…	59.96	1.0.0.17	1	596996450	2.0.10.182	10-22-2021	2021-10-22 01:50:44	09:50:44	2.0.10.92	1	affpro	WordList	1	1	1	61	j	NULL	NULL	NULL	NULL	NULL	NULL	1	NULL	NULL	NULL	NULL	NULL	NULL	NULL	NULL	NULL	NULL	NULL	NULL	pra2	taskList1	不成熟的	NULL	NULL	NULL	NULL	NULL	NULL	NULL
大创sc-iat	2	1	<?xml version="1.0"?>\n<Clock xmlns:dt="urn:schemas-microsoft-com:datatypes"><Description dt:dt="string">E-Prime Primary Realtime Clock</Description><StartTime><Timestamp dt:dt="int">0</Timestamp><DateUtc dt:dt="string">2021-10-22T01:50:43Z</DateUtc></StartTime><FrequencyChanges><FrequencyChange><Frequency dt:dt="r8">10000000</Frequency><Timestamp dt:dt="r8">17665795465106</Timestamp><Current dt:…	59.96	1.0.0.17	1	596996450	2.0.10.182	10-22-2021	2021-10-22 01:50:44	09:50:44	2.0.10.92	1	affpro	WordList	1	1	1	62	f	NULL	NULL	4	NULL	NULL	NULL	NULL	NULL	NULL	NULL	NULL	NULL	NULL	NULL	NULL	NULL	NULL	NULL	NULL	pra2	taskList1	动物转基因	NULL	NULL	NULL	NULL	NULL	NULL	NULL
大创sc-iat	2	1	<?xml version="1.0"?>\n<Clock xmlns:dt="urn:schemas-microsoft-com:datatypes"><Description dt:dt="string">E-Prime Primary Realtime Clock</Description><StartTime><Timestamp dt:dt="int">0</Timestamp><DateUtc dt:dt="string">2021-10-22T01:50:43Z</DateUtc></StartTime><FrequencyChanges><FrequencyChange><Frequency dt:dt="r8">10000000</Frequency><Timestamp dt:dt="r8">17665795465106</Timestamp><Current dt:…	59.96	1.0.0.17	1	596996450	2.0.10.182	10-22-2021	2021-10-22 01:50:44	09:50:44	2.0.10.92	1	affpro	WordList	1	1	1	63	f	NULL	NULL	NULL	NULL	NULL	NULL	NULL	NULL	NULL	NULL	3	NULL	NULL	NULL	NULL	NULL	NULL	NULL	NULL	pra2	taskList1	高科技的	NULL	NULL	NULL	NULL	NULL	NULL	NULL
大创sc-iat	2	1	<?xml version="1.0"?>\n<Clock xmlns:dt="urn:schemas-microsoft-com:datatypes"><Description dt:dt="string">E-Prime Primary Realtime Clock</Description><StartTime><Timestamp dt:dt="int">0</Timestamp><DateUtc dt:dt="string">2021-10-22T01:50:43Z</DateUtc></StartTime><FrequencyChanges><FrequencyChange><Frequency dt:dt="r8">10000000</Frequency><Timestamp dt:dt="r8">17665795465106</Timestamp><Current dt:…	59.96	1.0.0.17	1	596996450	2.0.10.182	10-22-2021	2021-10-22 01:50:44	09:50:44	2.0.10.92	1	affpro	WordList	1	1	1	64	j	NULL	NULL	NULL	NULL	NULL	NULL	4	NULL	NULL	NULL	NULL	NULL	NULL	NULL	NULL	NULL	NULL	NULL	NULL	pra2	taskList1	有争议的	NULL	NULL	NULL	NULL	NULL	NULL	NULL
大创sc-iat	2	1	<?xml version="1.0"?>\n<Clock xmlns:dt="urn:schemas-microsoft-com:datatypes"><Description dt:dt="string">E-Prime Primary Realtime Clock</Description><StartTime><Timestamp dt:dt="int">0</Timestamp><DateUtc dt:dt="string">2021-10-22T01:50:43Z</DateUtc></StartTime><FrequencyChanges><FrequencyChange><Frequency dt:dt="r8">10000000</Frequency><Timestamp dt:dt="r8">17665795465106</Timestamp><Current dt:…	59.96	1.0.0.17	1	596996450	2.0.10.182	10-22-2021	2021-10-22 01:50:44	09:50:44	2.0.10.92	1	affpro	WordList	1	1	1	65	f	NULL	NULL	1	NULL	NULL	NULL	NULL	NULL	NULL	NULL	NULL	NULL	NULL	NULL	NULL	NULL	NULL	NULL	NULL	pra2	taskList1	转基因食物	NULL	NULL	NULL	NULL	NULL	NULL	NULL
大创sc-iat	2	1	<?xml version="1.0"?>\n<Clock xmlns:dt="urn:schemas-microsoft-com:datatypes"><Description dt:dt="string">E-Prime Primary Realtime Clock</Description><StartTime><Timestamp dt:dt="int">0</Timestamp><DateUtc dt:dt="string">2021-10-22T01:50:43Z</DateUtc></StartTime><FrequencyChanges><FrequencyChange><Frequency dt:dt="r8">10000000</Frequency><Timestamp dt:dt="r8">17665795465106</Timestamp><Current dt:…	59.96	1.0.0.17	1	596996450	2.0.10.182	10-22-2021	2021-10-22 01:50:44	09:50:44	2.0.10.92	1	affpro	WordList	1	1	1	66	f	NULL	NULL	NULL	NULL	NULL	NULL	NULL	NULL	NULL	NULL	1	NULL	NULL	NULL	NULL	NULL	NULL	NULL	NULL	pra2	taskList1	科学的	NULL	NULL	NULL	NULL	NULL	NULL	NULL
大创sc-iat	2	1	<?xml version="1.0"?>\n<Clock xmlns:dt="urn:schemas-microsoft-com:datatypes"><Description dt:dt="string">E-Prime Primary Realtime Clock</Description><StartTime><Timestamp dt:dt="int">0</Timestamp><DateUtc dt:dt="string">2021-10-22T01:50:43Z</DateUtc></StartTime><FrequencyChanges><FrequencyChange><Frequency dt:dt="r8">10000000</Frequency><Timestamp dt:dt="r8">17665795465106</Timestamp><Current dt:…	59.96	1.0.0.17	1	596996450	2.0.10.182	10-22-2021	2021-10-22 01:50:44	09:50:44	2.0.10.92	1	affpro	WordList	1	1	1	67	j	NULL	NULL	NULL	NULL	NULL	NULL	2	NULL	NULL	NULL	NULL	NULL	NULL	NULL	NULL	NULL	NULL	NULL	NULL	pra2	taskList1	高风险的	NULL	NULL	NULL	NULL	NULL	NULL	NULL
大创sc-iat	2	1	<?xml version="1.0"?>\n<Clock xmlns:dt="urn:schemas-microsoft-com:datatypes"><Description dt:dt="string">E-Prime Primary Realtime Clock</Description><StartTime><Timestamp dt:dt="int">0</Timestamp><DateUtc dt:dt="string">2021-10-22T01:50:43Z</DateUtc></StartTime><FrequencyChanges><FrequencyChange><Frequency dt:dt="r8">10000000</Frequency><Timestamp dt:dt="r8">17665795465106</Timestamp><Current dt:…	59.96	1.0.0.17	1	596996450	2.0.10.182	10-22-2021	2021-10-22 01:50:44	09:50:44	2.0.10.92	1	affpro	WordList	1	1	1	68	j	NULL	NULL	NULL	NULL	NULL	NULL	1	NULL	NULL	NULL	NULL	NULL	NULL	NULL	NULL	NULL	NULL	NULL	NULL	pra2	taskList1	不成熟的	NULL	NULL	NULL	NULL	NULL	NULL	NULL
大创sc-iat	2	1	<?xml version="1.0"?>\n<Clock xmlns:dt="urn:schemas-microsoft-com:datatypes"><Description dt:dt="string">E-Prime Primary Realtime Clock</Description><StartTime><Timestamp dt:dt="int">0</Timestamp><DateUtc dt:dt="string">2021-10-22T01:50:43Z</DateUtc></StartTime><FrequencyChanges><FrequencyChange><Frequency dt:dt="r8">10000000</Frequency><Timestamp dt:dt="r8">17665795465106</Timestamp><Current dt:…	59.96	1.0.0.17	1	596996450	2.0.10.182	10-22-2021	2021-10-22 01:50:44	09:50:44	2.0.10.92	1	affpro	WordList	1	1	1	69	f	NULL	NULL	NULL	NULL	NULL	NULL	NULL	NULL	NULL	NULL	2	NULL	NULL	NULL	NULL	NULL	NULL	NULL	NULL	pra2	taskList1	高产的	NULL	NULL	NULL	NULL	NULL	NULL	NULL
大创sc-iat	2	1	<?xml version="1.0"?>\n<Clock xmlns:dt="urn:schemas-microsoft-com:datatypes"><Description dt:dt="string">E-Prime Primary Realtime Clock</Description><StartTime><Timestamp dt:dt="int">0</Timestamp><DateUtc dt:dt="string">2021-10-22T01:50:43Z</DateUtc></StartTime><FrequencyChanges><FrequencyChange><Frequency dt:dt="r8">10000000</Frequency><Timestamp dt:dt="r8">17665795465106</Timestamp><Current dt:…	59.96	1.0.0.17	1	596996450	2.0.10.182	10-22-2021	2021-10-22 01:50:44	09:50:44	2.0.10.92	1	affpro	WordList	1	1	1	70	f	NULL	NULL	2	NULL	NULL	NULL	NULL	NULL	NULL	NULL	NULL	NULL	NULL	NULL	NULL	NULL	NULL	NULL	NULL	pra2	taskList1	抗虫害棉花	NULL	NULL	NULL	NULL	NULL	NULL	NULL
大创sc-iat	2	1	<?xml version="1.0"?>\n<Clock xmlns:dt="urn:schemas-microsoft-com:datatypes"><Description dt:dt="string">E-Prime Primary Realtime Clock</Description><StartTime><Timestamp dt:dt="int">0</Timestamp><DateUtc dt:dt="string">2021-10-22T01:50:43Z</DateUtc></StartTime><FrequencyChanges><FrequencyChange><Frequency dt:dt="r8">10000000</Frequency><Timestamp dt:dt="r8">17665795465106</Timestamp><Current dt:…	59.96	1.0.0.17	1	596996450	2.0.10.182	10-22-2021	2021-10-22 01:50:44	09:50:44	2.0.10.92	1	affpro	WordList	1	1	1	71	j	NULL	NULL	NULL	NULL	NULL	NULL	3	NULL	NULL	NULL	NULL	NULL	NULL	NULL	NULL	NULL	NULL	NULL	NULL	pra2	taskList1	非天然的	NULL	NULL	NULL	NULL	NULL	NULL	NULL
大创sc-iat	2	1	<?xml version="1.0"?>\n<Clock xmlns:dt="urn:schemas-microsoft-com:datatypes"><Description dt:dt="string">E-Prime Primary Realtime Clock</Description><StartTime><Timestamp dt:dt="int">0</Timestamp><DateUtc dt:dt="string">2021-10-22T01:50:43Z</DateUtc></StartTime><FrequencyChanges><FrequencyChange><Frequency dt:dt="r8">10000000</Frequency><Timestamp dt:dt="r8">17665795465106</Timestamp><Current dt:…	59.96	1.0.0.17	1	596996450	2.0.10.182	10-22-2021	2021-10-22 01:50:44	09:50:44	2.0.10.92	1	affpro	WordList	1	1	1	72	j	NULL	NULL	NULL	NULL	NULL	NULL	4	NULL	NULL	NULL	NULL	NULL	NULL	NULL	NULL	NULL	NULL	NULL	NULL	pra2	taskList1	有争议的	NULL	NULL	NULL	NULL	NULL	NULL	NULL
大创sc-iat	2	1	<?xml version="1.0"?>\n<Clock xmlns:dt="urn:schemas-microsoft-com:datatypes"><Description dt:dt="string">E-Prime Primary Realtime Clock</Description><StartTime><Timestamp dt:dt="int">0</Timestamp><DateUtc dt:dt="string">2021-10-22T01:50:43Z</DateUtc></StartTime><FrequencyChanges><FrequencyChange><Frequency dt:dt="r8">10000000</Frequency><Timestamp dt:dt="r8">17665795465106</Timestamp><Current dt:…	59.96	1.0.0.17	1	596996450	2.0.10.182	10-22-2021	2021-10-22 01:50:44	09:50:44	2.0.10.92	1	affpro	WordList	1	1	1	73	f	NULL	NULL	NULL	NULL	NULL	NULL	NULL	NULL	NULL	NULL	3	NULL	NULL	NULL	NULL	NULL	NULL	NULL	NULL	pra2	taskList1	高科技的	NULL	NULL	NULL	NULL	NULL	NULL	NULL
大创sc-iat	2	1	<?xml version="1.0"?>\n<Clock xmlns:dt="urn:schemas-microsoft-com:datatypes"><Description dt:dt="string">E-Prime Primary Realtime Clock</Description><StartTime><Timestamp dt:dt="int">0</Timestamp><DateUtc dt:dt="string">2021-10-22T01:50:43Z</DateUtc></StartTime><FrequencyChanges><FrequencyChange><Frequency dt:dt="r8">10000000</Frequency><Timestamp dt:dt="r8">17665795465106</Timestamp><Current dt:…	59.96	1.0.0.17	1	596996450	2.0.10.182	10-22-2021	2021-10-22 01:50:44	09:50:44	2.0.10.92	1	affpro	WordList	1	1	1	74	f	NULL	NULL	4	NULL	NULL	NULL	NULL	NULL	NULL	NULL	NULL	NULL	NULL	NULL	NULL	NULL	NULL	NULL	NULL	pra2	taskList1	动物转基因	NULL	NULL	NULL	NULL	NULL	NULL	NULL
大创sc-iat	2	1	<?xml version="1.0"?>\n<Clock xmlns:dt="urn:schemas-microsoft-com:datatypes"><Description dt:dt="string">E-Prime Primary Realtime Clock</Description><StartTime><Timestamp dt:dt="int">0</Timestamp><DateUtc dt:dt="string">2021-10-22T01:50:43Z</DateUtc></StartTime><FrequencyChanges><FrequencyChange><Frequency dt:dt="r8">10000000</Frequency><Timestamp dt:dt="r8">17665795465106</Timestamp><Current dt:…	59.96	1.0.0.17	1	596996450	2.0.10.182	10-22-2021	2021-10-22 01:50:44	09:50:44	2.0.10.92	1	affpro	WordList	1	1	1	75	j	NULL	NULL	NULL	NULL	NULL	NULL	2	NULL	NULL	NULL	NULL	NULL	NULL	NULL	NULL	NULL	NULL	NULL	NULL	pra2	taskList1	高风险的	NULL	NULL	NULL	NULL	NULL	NULL	NULL
大创sc-iat	2	1	<?xml version="1.0"?>\n<Clock xmlns:dt="urn:schemas-microsoft-com:datatypes"><Description dt:dt="string">E-Prime Primary Realtime Clock</Description><StartTime><Timestamp dt:dt="int">0</Timestamp><DateUtc dt:dt="string">2021-10-22T01:50:43Z</DateUtc></StartTime><FrequencyChanges><FrequencyChange><Frequency dt:dt="r8">10000000</Frequency><Timestamp dt:dt="r8">17665795465106</Timestamp><Current dt:…	59.96	1.0.0.17	1	596996450	2.0.10.182	10-22-2021	2021-10-22 01:50:44	09:50:44	2.0.10.92	1	affpro	WordList	1	1	1	76	j	NULL	NULL	NULL	NULL	NULL	NULL	1	NULL	NULL	NULL	NULL	NULL	NULL	NULL	NULL	NULL	NULL	NULL	NULL	pra2	taskList1	不成熟的	NULL	NULL	NULL	NULL	NULL	NULL	NULL
大创sc-iat	2	1	<?xml version="1.0"?>\n<Clock xmlns:dt="urn:schemas-microsoft-com:datatypes"><Description dt:dt="string">E-Prime Primary Realtime Clock</Description><StartTime><Timestamp dt:dt="int">0</Timestamp><DateUtc dt:dt="string">2021-10-22T01:50:43Z</DateUtc></StartTime><FrequencyChanges><FrequencyChange><Frequency dt:dt="r8">10000000</Frequency><Timestamp dt:dt="r8">17665795465106</Timestamp><Current dt:…	59.96	1.0.0.17	1	596996450	2.0.10.182	10-22-2021	2021-10-22 01:50:44	09:50:44	2.0.10.92	1	affpro	WordList	1	1	1	77	f	NULL	NULL	NULL	NULL	NULL	NULL	NULL	NULL	NULL	NULL	2	NULL	NULL	NULL	NULL	NULL	NULL	NULL	NULL	pra2	taskList1	高产的	NULL	NULL	NULL	NULL	NULL	NULL	NULL
大创sc-iat	2	1	<?xml version="1.0"?>\n<Clock xmlns:dt="urn:schemas-microsoft-com:datatypes"><Description dt:dt="string">E-Prime Primary Realtime Clock</Description><StartTime><Timestamp dt:dt="int">0</Timestamp><DateUtc dt:dt="string">2021-10-22T01:50:43Z</DateUtc></StartTime><FrequencyChanges><FrequencyChange><Frequency dt:dt="r8">10000000</Frequency><Timestamp dt:dt="r8">17665795465106</Timestamp><Current dt:…	59.96	1.0.0.17	1	596996450	2.0.10.182	10-22-2021	2021-10-22 01:50:44	09:50:44	2.0.10.92	1	affpro	WordList	1	1	1	78	f	NULL	NULL	3	NULL	NULL	NULL	NULL	NULL	NULL	NULL	NULL	NULL	NULL	NULL	NULL	NULL	NULL	NULL	NULL	pra2	taskList1	转基因大豆	NULL	NULL	NULL	NULL	NULL	NULL	NULL
大创sc-iat	2	1	<?xml version="1.0"?>\n<Clock xmlns:dt="urn:schemas-microsoft-com:datatypes"><Description dt:dt="string">E-Prime Primary Realtime Clock</Description><StartTime><Timestamp dt:dt="int">0</Timestamp><DateUtc dt:dt="string">2021-10-22T01:50:43Z</DateUtc></StartTime><FrequencyChanges><FrequencyChange><Frequency dt:dt="r8">10000000</Frequency><Timestamp dt:dt="r8">17665795465106</Timestamp><Current dt:…	59.96	1.0.0.17	1	596996450	2.0.10.182	10-22-2021	2021-10-22 01:50:44	09:50:44	2.0.10.92	1	affpro	WordList	1	1	1	79	j	NULL	NULL	NULL	NULL	NULL	NULL	4	NULL	NULL	NULL	NULL	NULL	NULL	NULL	NULL	NULL	NULL	NULL	NULL	pra2	taskList1	有争议的	NULL	NULL	NULL	NULL	NULL	NULL	NULL
大创sc-iat	2	1	<?xml version="1.0"?>\n<Clock xmlns:dt="urn:schemas-microsoft-com:datatypes"><Description dt:dt="string">E-Prime Primary Realtime Clock</Description><StartTime><Timestamp dt:dt="int">0</Timestamp><DateUtc dt:dt="string">2021-10-22T01:50:43Z</DateUtc></StartTime><FrequencyChanges><FrequencyChange><Frequency dt:dt="r8">10000000</Frequency><Timestamp dt:dt="r8">17665795465106</Timestamp><Current dt:…	59.96	1.0.0.17	1	596996450	2.0.10.182	10-22-2021	2021-10-22 01:50:44	09:50:44	2.0.10.92	1	affpro	WordList	1	1	1	80	j	NULL	NULL	NULL	NULL	NULL	NULL	3	NULL	NULL	NULL	NULL	NULL	NULL	NULL	NULL	NULL	NULL	NULL	NULL	pra2	taskList1	非天然的	NULL	NULL	NULL	NULL	NULL	NULL	NULL
大创sc-iat	2	1	<?xml version="1.0"?>\n<Clock xmlns:dt="urn:schemas-microsoft-com:datatypes"><Description dt:dt="string">E-Prime Primary Realtime Clock</Description><StartTime><Timestamp dt:dt="int">0</Timestamp><DateUtc dt:dt="string">2021-10-22T01:50:43Z</DateUtc></StartTime><FrequencyChanges><FrequencyChange><Frequency dt:dt="r8">10000000</Frequency><Timestamp dt:dt="r8">17665795465106</Timestamp><Current dt:…	59.96	1.0.0.17	1	596996450	2.0.10.182	10-22-2021	2021-10-22 01:50:44	09:50:44	2.0.10.92	1	affpro	WordList	1	1	1	81	f	NULL	NULL	NULL	NULL	NULL	NULL	NULL	NULL	NULL	NULL	4	NULL	NULL	NULL	NULL	NULL	NULL	NULL	NULL	pra2	taskList1	创新的	NULL	NULL	NULL	NULL	NULL	NULL	NULL
大创sc-iat	2	1	<?xml version="1.0"?>\n<Clock xmlns:dt="urn:schemas-microsoft-com:datatypes"><Description dt:dt="string">E-Prime Primary Realtime Clock</Description><StartTime><Timestamp dt:dt="int">0</Timestamp><DateUtc dt:dt="string">2021-10-22T01:50:43Z</DateUtc></StartTime><FrequencyChanges><FrequencyChange><Frequency dt:dt="r8">10000000</Frequency><Timestamp dt:dt="r8">17665795465106</Timestamp><Current dt:…	59.96	1.0.0.17	1	596996450	2.0.10.182	10-22-2021	2021-10-22 01:50:44	09:50:44	2.0.10.92	1	affpro	WordList	1	1	1	82	f	NULL	NULL	1	NULL	NULL	NULL	NULL	NULL	NULL	NULL	NULL	NULL	NULL	NULL	NULL	NULL	NULL	NULL	NULL	pra2	taskList1	转基因食物	NULL	NULL	NULL	NULL	NULL	NULL	NULL
大创sc-iat	2	1	<?xml version="1.0"?>\n<Clock xmlns:dt="urn:schemas-microsoft-com:datatypes"><Description dt:dt="string">E-Prime Primary Realtime Clock</Description><StartTime><Timestamp dt:dt="int">0</Timestamp><DateUtc dt:dt="string">2021-10-22T01:50:43Z</DateUtc></StartTime><FrequencyChanges><FrequencyChange><Frequency dt:dt="r8">10000000</Frequency><Timestamp dt:dt="r8">17665795465106</Timestamp><Current dt:…	59.96	1.0.0.17	1	596996450	2.0.10.182	10-22-2021	2021-10-22 01:50:44	09:50:44	2.0.10.92	1	affpro	WordList	1	1	1	83	j	NULL	NULL	NULL	NULL	NULL	NULL	4	NULL	NULL	NULL	NULL	NULL	NULL	NULL	NULL	NULL	NULL	NULL	NULL	pra2	taskList1	有争议的	NULL	NULL	NULL	NULL	NULL	NULL	NULL
大创sc-iat	2	1	<?xml version="1.0"?>\n<Clock xmlns:dt="urn:schemas-microsoft-com:datatypes"><Description dt:dt="string">E-Prime Primary Realtime Clock</Description><StartTime><Timestamp dt:dt="int">0</Timestamp><DateUtc dt:dt="string">2021-10-22T01:50:43Z</DateUtc></StartTime><FrequencyChanges><FrequencyChange><Frequency dt:dt="r8">10000000</Frequency><Timestamp dt:dt="r8">17665795465106</Timestamp><Current dt:…	59.96	1.0.0.17	1	596996450	2.0.10.182	10-22-2021	2021-10-22 01:50:44	09:50:44	2.0.10.92	1	affpro	WordList	1	1	1	84	j	NULL	NULL	NULL	NULL	NULL	NULL	1	NULL	NULL	NULL	NULL	NULL	NULL	NULL	NULL	NULL	NULL	NULL	NULL	pra2	taskList1	不成熟的	NULL	NULL	NULL	NULL	NULL	NULL	NULL
大创sc-iat	2	1	<?xml version="1.0"?>\n<Clock xmlns:dt="urn:schemas-microsoft-com:datatypes"><Description dt:dt="string">E-Prime Primary Realtime Clock</Description><StartTime><Timestamp dt:dt="int">0</Timestamp><DateUtc dt:dt="string">2021-10-22T01:50:43Z</DateUtc></StartTime><FrequencyChanges><FrequencyChange><Frequency dt:dt="r8">10000000</Frequency><Timestamp dt:dt="r8">17665795465106</Timestamp><Current dt:…	59.96	1.0.0.17	1	596996450	2.0.10.182	10-22-2021	2021-10-22 01:50:44	09:50:44	2.0.10.92	1	affpro	WordList	1	1	1	85	f	NULL	NULL	2	NULL	NULL	NULL	NULL	NULL	NULL	NULL	NULL	NULL	NULL	NULL	NULL	NULL	NULL	NULL	NULL	pra2	taskList1	抗虫害棉花	NULL	NULL	NULL	NULL	NULL	NULL	NULL
大创sc-iat	2	1	<?xml version="1.0"?>\n<Clock xmlns:dt="urn:schemas-microsoft-com:datatypes"><Description dt:dt="string">E-Prime Primary Realtime Clock</Description><StartTime><Timestamp dt:dt="int">0</Timestamp><DateUtc dt:dt="string">2021-10-22T01:50:43Z</DateUtc></StartTime><FrequencyChanges><FrequencyChange><Frequency dt:dt="r8">10000000</Frequency><Timestamp dt:dt="r8">17665795465106</Timestamp><Current dt:…	59.96	1.0.0.17	1	596996450	2.0.10.182	10-22-2021	2021-10-22 01:50:44	09:50:44	2.0.10.92	1	affpro	WordList	1	1	1	86	j	NULL	NULL	NULL	NULL	NULL	NULL	3	NULL	NULL	NULL	NULL	NULL	NULL	NULL	NULL	NULL	NULL	NULL	NULL	pra2	taskList1	非天然的	NULL	NULL	NULL	NULL	NULL	NULL	NULL
大创sc-iat	2	1	<?xml version="1.0"?>\n<Clock xmlns:dt="urn:schemas-microsoft-com:datatypes"><Description dt:dt="string">E-Prime Primary Realtime Clock</Description><StartTime><Timestamp dt:dt="int">0</Timestamp><DateUtc dt:dt="string">2021-10-22T01:50:43Z</DateUtc></StartTime><FrequencyChanges><FrequencyChange><Frequency dt:dt="r8">10000000</Frequency><Timestamp dt:dt="r8">17665795465106</Timestamp><Current dt:…	59.96	1.0.0.17	1	596996450	2.0.10.182	10-22-2021	2021-10-22 01:50:44	09:50:44	2.0.10.92	1	affpro	WordList	1	1	1	87	j	NULL	NULL	NULL	NULL	NULL	NULL	2	NULL	NULL	NULL	NULL	NULL	NULL	NULL	NULL	NULL	NULL	NULL	NULL	pra2	taskList1	高风险的	NULL	NULL	NULL	NULL	NULL	NULL	NULL
大创sc-iat	2	1	<?xml version="1.0"?>\n<Clock xmlns:dt="urn:schemas-microsoft-com:datatypes"><Description dt:dt="string">E-Prime Primary Realtime Clock</Description><StartTime><Timestamp dt:dt="int">0</Timestamp><DateUtc dt:dt="string">2021-10-22T01:50:43Z</DateUtc></StartTime><FrequencyChanges><FrequencyChange><Frequency dt:dt="r8">10000000</Frequency><Timestamp dt:dt="r8">17665795465106</Timestamp><Current dt:…	59.96	1.0.0.17	1	596996450	2.0.10.182	10-22-2021	2021-10-22 01:50:44	09:50:44	2.0.10.92	1	affpro	WordList	1	1	1	88	f	NULL	NULL	NULL	NULL	NULL	NULL	NULL	NULL	NULL	NULL	1	NULL	NULL	NULL	NULL	NULL	NULL	NULL	NULL	pra2	taskList1	科学的	NULL	NULL	NULL	NULL	NULL	NULL	NULL
大创sc-iat	2	1	<?xml version="1.0"?>\n<Clock xmlns:dt="urn:schemas-microsoft-com:datatypes"><Description dt:dt="string">E-Prime Primary Realtime Clock</Description><StartTime><Timestamp dt:dt="int">0</Timestamp><DateUtc dt:dt="string">2021-10-22T01:50:43Z</DateUtc></StartTime><FrequencyChanges><FrequencyChange><Frequency dt:dt="r8">10000000</Frequency><Timestamp dt:dt="r8">17665795465106</Timestamp><Current dt:…	59.96	1.0.0.17	1	596996450	2.0.10.182	10-22-2021	2021-10-22 01:50:44	09:50:44	2.0.10.92	1	affpro	WordList	1	1	1	89	j	NULL	NULL	NULL	NULL	NULL	NULL	4	NULL	NULL	NULL	NULL	NULL	NULL	NULL	NULL	NULL	NULL	NULL	NULL	pra2	taskList1	有争议的	NULL	NULL	NULL	NULL	NULL	NULL	NULL
大创sc-iat	2	1	<?xml version="1.0"?>\n<Clock xmlns:dt="urn:schemas-microsoft-com:datatypes"><Description dt:dt="string">E-Prime Primary Realtime Clock</Description><StartTime><Timestamp dt:dt="int">0</Timestamp><DateUtc dt:dt="string">2021-10-22T01:50:43Z</DateUtc></StartTime><FrequencyChanges><FrequencyChange><Frequency dt:dt="r8">10000000</Frequency><Timestamp dt:dt="r8">17665795465106</Timestamp><Current dt:…	59.96	1.0.0.17	1	596996450	2.0.10.182	10-22-2021	2021-10-22 01:50:44	09:50:44	2.0.10.92	1	affpro	WordList	1	1	1	90	j	NULL	NULL	NULL	NULL	NULL	NULL	1	NULL	NULL	NULL	NULL	NULL	NULL	NULL	NULL	NULL	NULL	NULL	NULL	pra2	taskList1	不成熟的	NULL	NULL	NULL	NULL	NULL	NULL	NULL
大创sc-iat	2	1	<?xml version="1.0"?>\n<Clock xmlns:dt="urn:schemas-microsoft-com:datatypes"><Description dt:dt="string">E-Prime Primary Realtime Clock</Description><StartTime><Timestamp dt:dt="int">0</Timestamp><DateUtc dt:dt="string">2021-10-22T01:50:43Z</DateUtc></StartTime><FrequencyChanges><FrequencyChange><Frequency dt:dt="r8">10000000</Frequency><Timestamp dt:dt="r8">17665795465106</Timestamp><Current dt:…	59.96	1.0.0.17	1	596996450	2.0.10.182	10-22-2021	2021-10-22 01:50:44	09:50:44	2.0.10.92	1	affpro	WordList	1	1	1	91	f	NULL	NULL	NULL	NULL	NULL	NULL	NULL	NULL	NULL	NULL	2	NULL	NULL	NULL	NULL	NULL	NULL	NULL	NULL	pra2	taskList1	高产的	NULL	NULL	NULL	NULL	NULL	NULL	NULL
大创sc-iat	2	1	<?xml version="1.0"?>\n<Clock xmlns:dt="urn:schemas-microsoft-com:datatypes"><Description dt:dt="string">E-Prime Primary Realtime Clock</Description><StartTime><Timestamp dt:dt="int">0</Timestamp><DateUtc dt:dt="string">2021-10-22T01:50:43Z</DateUtc></StartTime><FrequencyChanges><FrequencyChange><Frequency dt:dt="r8">10000000</Frequency><Timestamp dt:dt="r8">17665795465106</Timestamp><Current dt:…	59.96	1.0.0.17	1	596996450	2.0.10.182	10-22-2021	2021-10-22 01:50:44	09:50:44	2.0.10.92	1	affpro	WordList	1	1	1	92	f	NULL	NULL	1	NULL	NULL	NULL	NULL	NULL	NULL	NULL	NULL	NULL	NULL	NULL	NULL	NULL	NULL	NULL	NULL	pra2	taskList1	转基因食物	NULL	NULL	NULL	NULL	NULL	NULL	NULL
大创sc-iat	2	1	<?xml version="1.0"?>\n<Clock xmlns:dt="urn:schemas-microsoft-com:datatypes"><Description dt:dt="string">E-Prime Primary Realtime Clock</Description><StartTime><Timestamp dt:dt="int">0</Timestamp><DateUtc dt:dt="string">2021-10-22T01:50:43Z</DateUtc></StartTime><FrequencyChanges><FrequencyChange><Frequency dt:dt="r8">10000000</Frequency><Timestamp dt:dt="r8">17665795465106</Timestamp><Current dt:…	59.96	1.0.0.17	1	596996450	2.0.10.182	10-22-2021	2021-10-22 01:50:44	09:50:44	2.0.10.92	1	affpro	WordList	1	1	1	93	j	NULL	NULL	NULL	NULL	NULL	NULL	3	NULL	NULL	NULL	NULL	NULL	NULL	NULL	NULL	NULL	NULL	NULL	NULL	pra2	taskList1	非天然的	NULL	NULL	NULL	NULL	NULL	NULL	NULL
大创sc-iat	2	1	<?xml version="1.0"?>\n<Clock xmlns:dt="urn:schemas-microsoft-com:datatypes"><Description dt:dt="string">E-Prime Primary Realtime Clock</Description><StartTime><Timestamp dt:dt="int">0</Timestamp><DateUtc dt:dt="string">2021-10-22T01:50:43Z</DateUtc></StartTime><FrequencyChanges><FrequencyChange><Frequency dt:dt="r8">10000000</Frequency><Timestamp dt:dt="r8">17665795465106</Timestamp><Current dt:…	59.96	1.0.0.17	1	596996450	2.0.10.182	10-22-2021	2021-10-22 01:50:44	09:50:44	2.0.10.92	1	affpro	WordList	1	1	1	94	f	NULL	NULL	3	NULL	NULL	NULL	NULL	NULL	NULL	NULL	NULL	NULL	NULL	NULL	NULL	NULL	NULL	NULL	NULL	pra2	taskList1	转基因大豆	NULL	NULL	NULL	NULL	NULL	NULL	NULL
大创sc-iat	2	1	<?xml version="1.0"?>\n<Clock xmlns:dt="urn:schemas-microsoft-com:datatypes"><Description dt:dt="string">E-Prime Primary Realtime Clock</Description><StartTime><Timestamp dt:dt="int">0</Timestamp><DateUtc dt:dt="string">2021-10-22T01:50:43Z</DateUtc></StartTime><FrequencyChanges><FrequencyChange><Frequency dt:dt="r8">10000000</Frequency><Timestamp dt:dt="r8">17665795465106</Timestamp><Current dt:…	59.96	1.0.0.17	1	596996450	2.0.10.182	10-22-2021	2021-10-22 01:50:44	09:50:44	2.0.10.92	1	affpro	WordList	1	1	1	95	j	NULL	NULL	NULL	NULL	NULL	NULL	2	NULL	NULL	NULL	NULL	NULL	NULL	NULL	NULL	NULL	NULL	NULL	NULL	pra2	taskList1	高风险的	NULL	NULL	NULL	NULL	NULL	NULL	NULL
大创sc-iat	2	1	<?xml version="1.0"?>\n<Clock xmlns:dt="urn:schemas-microsoft-com:datatypes"><Description dt:dt="string">E-Prime Primary Realtime Clock</Description><StartTime><Timestamp dt:dt="int">0</Timestamp><DateUtc dt:dt="string">2021-10-22T01:50:43Z</DateUtc></StartTime><FrequencyChanges><FrequencyChange><Frequency dt:dt="r8">10000000</Frequency><Timestamp dt:dt="r8">17665795465106</Timestamp><Current dt:…	59.96	1.0.0.17	1	596996450	2.0.10.182	10-22-2021	2021-10-22 01:50:44	09:50:44	2.0.10.92	1	affpro	WordList	1	1	1	96	f	NULL	NULL	NULL	NULL	NULL	NULL	NULL	NULL	NULL	NULL	1	NULL	NULL	NULL	NULL	NULL	NULL	NULL	NULL	pra2	taskList1	科学的	NULL	NULL	NULL	NULL	NULL	NULL	NULL
大创sc-iat	2	1	<?xml version="1.0"?>\n<Clock xmlns:dt="urn:schemas-microsoft-com:datatypes"><Description dt:dt="string">E-Prime Primary Realtime Clock</Description><StartTime><Timestamp dt:dt="int">0</Timestamp><DateUtc dt:dt="string">2021-10-22T01:50:43Z</DateUtc></StartTime><FrequencyChanges><FrequencyChange><Frequency dt:dt="r8">10000000</Frequency><Timestamp dt:dt="r8">17665795465106</Timestamp><Current dt:…	59.96	1.0.0.17	1	596996450	2.0.10.182	10-22-2021	2021-10-22 01:50:44	09:50:44	2.0.10.92	1	affpro	WordList	1	1	1	97	f	NULL	NULL	NULL	NULL	NULL	NULL	NULL	NULL	NULL	NULL	NULL	4	NULL	NULL	NULL	NULL	2	1	1	pra3	practiceList2	创新的	NULL	NULL	NULL	NULL	NULL	NULL	NULL
大创sc-iat	2	1	<?xml version="1.0"?>\n<Clock xmlns:dt="urn:schemas-microsoft-com:datatypes"><Description dt:dt="string">E-Prime Primary Realtime Clock</Description><StartTime><Timestamp dt:dt="int">0</Timestamp><DateUtc dt:dt="string">2021-10-22T01:50:43Z</DateUtc></StartTime><FrequencyChanges><FrequencyChange><Frequency dt:dt="r8">10000000</Frequency><Timestamp dt:dt="r8">17665795465106</Timestamp><Current dt:…	59.96	1.0.0.17	1	596996450	2.0.10.182	10-22-2021	2021-10-22 01:50:44	09:50:44	2.0.10.92	1	affpro	WordList	1	1	1	98	j	NULL	NULL	NULL	4	NULL	NULL	NULL	NULL	NULL	NULL	NULL	NULL	NULL	NULL	NULL	NULL	1	1	2	pra3	practiceList2	动物转基因	NULL	NULL	NULL	NULL	NULL	NULL	NULL
大创sc-iat	2	1	<?xml version="1.0"?>\n<Clock xmlns:dt="urn:schemas-microsoft-com:datatypes"><Description dt:dt="string">E-Prime Primary Realtime Clock</Description><StartTime><Timestamp dt:dt="int">0</Timestamp><DateUtc dt:dt="string">2021-10-22T01:50:43Z</DateUtc></StartTime><FrequencyChanges><FrequencyChange><Frequency dt:dt="r8">10000000</Frequency><Timestamp dt:dt="r8">17665795465106</Timestamp><Current dt:…	59.96	1.0.0.17	1	596996450	2.0.10.182	10-22-2021	2021-10-22 01:50:44	09:50:44	2.0.10.92	1	affpro	WordList	1	1	1	99	f	NULL	NULL	NULL	NULL	NULL	NULL	NULL	NULL	NULL	NULL	NULL	1	NULL	NULL	NULL	NULL	2	1	3	pra3	practiceList2	科学的	NULL	NULL	NULL	NULL	NULL	NULL	NULL
大创sc-iat	2	1	<?xml version="1.0"?>\n<Clock xmlns:dt="urn:schemas-microsoft-com:datatypes"><Description dt:dt="string">E-Prime Primary Realtime Clock</Description><StartTime><Timestamp dt:dt="int">0</Timestamp><DateUtc dt:dt="string">2021-10-22T01:50:43Z</DateUtc></StartTime><FrequencyChanges><FrequencyChange><Frequency dt:dt="r8">10000000</Frequency><Timestamp dt:dt="r8">17665795465106</Timestamp><Current dt:…	59.96	1.0.0.17	1	596996450	2.0.10.182	10-22-2021	2021-10-22 01:50:44	09:50:44	2.0.10.92	1	affpro	WordList	1	1	1	100	j	NULL	NULL	NULL	NULL	NULL	NULL	NULL	1	NULL	NULL	NULL	NULL	NULL	NULL	NULL	NULL	3	1	4	pra3	practiceList2	不成熟的	NULL	NULL	NULL	NULL	NULL	NULL	NULL
大创sc-iat	2	1	<?xml version="1.0"?>\n<Clock xmlns:dt="urn:schemas-microsoft-com:datatypes"><Description dt:dt="string">E-Prime Primary Realtime Clock</Description><StartTime><Timestamp dt:dt="int">0</Timestamp><DateUtc dt:dt="string">2021-10-22T01:50:43Z</DateUtc></StartTime><FrequencyChanges><FrequencyChange><Frequency dt:dt="r8">10000000</Frequency><Timestamp dt:dt="r8">17665795465106</Timestamp><Current dt:…	59.96	1.0.0.17	1	596996450	2.0.10.182	10-22-2021	2021-10-22 01:50:44	09:50:44	2.0.10.92	1	affpro	WordList	1	1	1	101	j	NULL	NULL	NULL	2	NULL	NULL	NULL	NULL	NULL	NULL	NULL	NULL	NULL	NULL	NULL	NULL	1	2	5	pra3	practiceList2	抗虫害棉花	NULL	NULL	NULL	NULL	NULL	NULL	NULL
大创sc-iat	2	1	<?xml version="1.0"?>\n<Clock xmlns:dt="urn:schemas-microsoft-com:datatypes"><Description dt:dt="string">E-Prime Primary Realtime Clock</Description><StartTime><Timestamp dt:dt="int">0</Timestamp><DateUtc dt:dt="string">2021-10-22T01:50:43Z</DateUtc></StartTime><FrequencyChanges><FrequencyChange><Frequency dt:dt="r8">10000000</Frequency><Timestamp dt:dt="r8">17665795465106</Timestamp><Current dt:…	59.96	1.0.0.17	1	596996450	2.0.10.182	10-22-2021	2021-10-22 01:50:44	09:50:44	2.0.10.92	1	affpro	WordList	1	1	1	102	f	NULL	NULL	NULL	NULL	NULL	NULL	NULL	NULL	NULL	NULL	NULL	2	NULL	NULL	NULL	NULL	2	2	6	pra3	practiceList2	高产的	NULL	NULL	NULL	NULL	NULL	NULL	NULL
大创sc-iat	2	1	<?xml version="1.0"?>\n<Clock xmlns:dt="urn:schemas-microsoft-com:datatypes"><Description dt:dt="string">E-Prime Primary Realtime Clock</Description><StartTime><Timestamp dt:dt="int">0</Timestamp><DateUtc dt:dt="string">2021-10-22T01:50:43Z</DateUtc></StartTime><FrequencyChanges><FrequencyChange><Frequency dt:dt="r8">10000000</Frequency><Timestamp dt:dt="r8">17665795465106</Timestamp><Current dt:…	59.96	1.0.0.17	1	596996450	2.0.10.182	10-22-2021	2021-10-22 01:50:44	09:50:44	2.0.10.92	1	affpro	WordList	1	1	1	103	j	NULL	NULL	NULL	NULL	NULL	NULL	NULL	4	NULL	NULL	NULL	NULL	NULL	NULL	NULL	NULL	3	2	7	pra3	practiceList2	有争议的	NULL	NULL	NULL	NULL	NULL	NULL	NULL
大创sc-iat	2	1	<?xml version="1.0"?>\n<Clock xmlns:dt="urn:schemas-microsoft-com:datatypes"><Description dt:dt="string">E-Prime Primary Realtime Clock</Description><StartTime><Timestamp dt:dt="int">0</Timestamp><DateUtc dt:dt="string">2021-10-22T01:50:43Z</DateUtc></StartTime><FrequencyChanges><FrequencyChange><Frequency dt:dt="r8">10000000</Frequency><Timestamp dt:dt="r8">17665795465106</Timestamp><Current dt:…	59.96	1.0.0.17	1	596996450	2.0.10.182	10-22-2021	2021-10-22 01:50:44	09:50:44	2.0.10.92	1	affpro	WordList	1	1	1	104	f	NULL	NULL	NULL	NULL	NULL	NULL	NULL	NULL	NULL	NULL	NULL	3	NULL	NULL	NULL	NULL	2	2	8	pra3	practiceList2	高科技的	NULL	NULL	NULL	NULL	NULL	NULL	NULL
大创sc-iat	2	1	<?xml version="1.0"?>\n<Clock xmlns:dt="urn:schemas-microsoft-com:datatypes"><Description dt:dt="string">E-Prime Primary Realtime Clock</Description><StartTime><Timestamp dt:dt="int">0</Timestamp><DateUtc dt:dt="string">2021-10-22T01:50:43Z</DateUtc></StartTime><FrequencyChanges><FrequencyChange><Frequency dt:dt="r8">10000000</Frequency><Timestamp dt:dt="r8">17665795465106</Timestamp><Current dt:…	59.96	1.0.0.17	1	596996450	2.0.10.182	10-22-2021	2021-10-22 01:50:44	09:50:44	2.0.10.92	1	affpro	WordList	1	1	1	105	j	NULL	NULL	NULL	3	NULL	NULL	NULL	NULL	NULL	NULL	NULL	NULL	NULL	NULL	NULL	NULL	1	3	9	pra3	practiceList2	转基因大豆	NULL	NULL	NULL	NULL	NULL	NULL	NULL
大创sc-iat	2	1	<?xml version="1.0"?>\n<Clock xmlns:dt="urn:schemas-microsoft-com:datatypes"><Description dt:dt="string">E-Prime Primary Realtime Clock</Description><StartTime><Timestamp dt:dt="int">0</Timestamp><DateUtc dt:dt="string">2021-10-22T01:50:43Z</DateUtc></StartTime><FrequencyChanges><FrequencyChange><Frequency dt:dt="r8">10000000</Frequency><Timestamp dt:dt="r8">17665795465106</Timestamp><Current dt:…	59.96	1.0.0.17	1	596996450	2.0.10.182	10-22-2021	2021-10-22 01:50:44	09:50:44	2.0.10.92	1	affpro	WordList	1	1	1	106	f	NULL	NULL	NULL	NULL	NULL	NULL	NULL	NULL	NULL	NULL	NULL	4	NULL	NULL	NULL	NULL	2	3	10	pra3	practiceList2	创新的	NULL	NULL	NULL	NULL	NULL	NULL	NULL
大创sc-iat	2	1	<?xml version="1.0"?>\n<Clock xmlns:dt="urn:schemas-microsoft-com:datatypes"><Description dt:dt="string">E-Prime Primary Realtime Clock</Description><StartTime><Timestamp dt:dt="int">0</Timestamp><DateUtc dt:dt="string">2021-10-22T01:50:43Z</DateUtc></StartTime><FrequencyChanges><FrequencyChange><Frequency dt:dt="r8">10000000</Frequency><Timestamp dt:dt="r8">17665795465106</Timestamp><Current dt:…	59.96	1.0.0.17	1	596996450	2.0.10.182	10-22-2021	2021-10-22 01:50:44	09:50:44	2.0.10.92	1	affpro	WordList	1	1	1	107	j	NULL	NULL	NULL	NULL	NULL	NULL	NULL	2	NULL	NULL	NULL	NULL	NULL	NULL	NULL	NULL	3	3	11	pra3	practiceList2	高风险的	NULL	NULL	NULL	NULL	NULL	NULL	NULL
大创sc-iat	2	1	<?xml version="1.0"?>\n<Clock xmlns:dt="urn:schemas-microsoft-com:datatypes"><Description dt:dt="string">E-Prime Primary Realtime Clock</Description><StartTime><Timestamp dt:dt="int">0</Timestamp><DateUtc dt:dt="string">2021-10-22T01:50:43Z</DateUtc></StartTime><FrequencyChanges><FrequencyChange><Frequency dt:dt="r8">10000000</Frequency><Timestamp dt:dt="r8">17665795465106</Timestamp><Current dt:…	59.96	1.0.0.17	1	596996450	2.0.10.182	10-22-2021	2021-10-22 01:50:44	09:50:44	2.0.10.92	1	affpro	WordList	1	1	1	108	f	NULL	NULL	NULL	NULL	NULL	NULL	NULL	NULL	NULL	NULL	NULL	2	NULL	NULL	NULL	NULL	2	3	12	pra3	practiceList2	高产的	NULL	NULL	NULL	NULL	NULL	NULL	NULL
大创sc-iat	2	1	<?xml version="1.0"?>\n<Clock xmlns:dt="urn:schemas-microsoft-com:datatypes"><Description dt:dt="string">E-Prime Primary Realtime Clock</Description><StartTime><Timestamp dt:dt="int">0</Timestamp><DateUtc dt:dt="string">2021-10-22T01:50:43Z</DateUtc></StartTime><FrequencyChanges><FrequencyChange><Frequency dt:dt="r8">10000000</Frequency><Timestamp dt:dt="r8">17665795465106</Timestamp><Current dt:…	59.96	1.0.0.17	1	596996450	2.0.10.182	10-22-2021	2021-10-22 01:50:44	09:50:44	2.0.10.92	1	affpro	WordList	1	1	1	109	j	NULL	NULL	NULL	NULL	NULL	NULL	NULL	3	NULL	NULL	NULL	NULL	NULL	NULL	NULL	NULL	3	4	13	pra3	practiceList2	非天然的	NULL	NULL	NULL	NULL	NULL	NULL	NULL
大创sc-iat	2	1	<?xml version="1.0"?>\n<Clock xmlns:dt="urn:schemas-microsoft-com:datatypes"><Description dt:dt="string">E-Prime Primary Realtime Clock</Description><StartTime><Timestamp dt:dt="int">0</Timestamp><DateUtc dt:dt="string">2021-10-22T01:50:43Z</DateUtc></StartTime><FrequencyChanges><FrequencyChange><Frequency dt:dt="r8">10000000</Frequency><Timestamp dt:dt="r8">17665795465106</Timestamp><Current dt:…	59.96	1.0.0.17	1	596996450	2.0.10.182	10-22-2021	2021-10-22 01:50:44	09:50:44	2.0.10.92	1	affpro	WordList	1	1	1	110	f	NULL	NULL	NULL	NULL	NULL	NULL	NULL	NULL	NULL	NULL	NULL	3	NULL	NULL	NULL	NULL	2	4	14	pra3	practiceList2	高科技的	NULL	NULL	NULL	NULL	NULL	NULL	NULL
大创sc-iat	2	1	<?xml version="1.0"?>\n<Clock xmlns:dt="urn:schemas-microsoft-com:datatypes"><Description dt:dt="string">E-Prime Primary Realtime Clock</Description><StartTime><Timestamp dt:dt="int">0</Timestamp><DateUtc dt:dt="string">2021-10-22T01:50:43Z</DateUtc></StartTime><FrequencyChanges><FrequencyChange><Frequency dt:dt="r8">10000000</Frequency><Timestamp dt:dt="r8">17665795465106</Timestamp><Current dt:…	59.96	1.0.0.17	1	596996450	2.0.10.182	10-22-2021	2021-10-22 01:50:44	09:50:44	2.0.10.92	1	affpro	WordList	1	1	1	111	j	NULL	NULL	NULL	1	NULL	NULL	NULL	NULL	NULL	NULL	NULL	NULL	NULL	NULL	NULL	NULL	1	4	15	pra3	practiceList2	转基因食物	NULL	NULL	NULL	NULL	NULL	NULL	NULL
大创sc-iat	2	1	<?xml version="1.0"?>\n<Clock xmlns:dt="urn:schemas-microsoft-com:datatypes"><Description dt:dt="string">E-Prime Primary Realtime Clock</Description><StartTime><Timestamp dt:dt="int">0</Timestamp><DateUtc dt:dt="string">2021-10-22T01:50:43Z</DateUtc></StartTime><FrequencyChanges><FrequencyChange><Frequency dt:dt="r8">10000000</Frequency><Timestamp dt:dt="r8">17665795465106</Timestamp><Current dt:…	59.96	1.0.0.17	1	596996450	2.0.10.182	10-22-2021	2021-10-22 01:50:44	09:50:44	2.0.10.92	1	affpro	WordList	1	1	1	112	f	NULL	NULL	NULL	NULL	NULL	NULL	NULL	NULL	NULL	NULL	NULL	1	NULL	NULL	NULL	NULL	2	4	16	pra3	practiceList2	科学的	NULL	NULL	NULL	NULL	NULL	NULL	NULL
大创sc-iat	2	1	<?xml version="1.0"?>\n<Clock xmlns:dt="urn:schemas-microsoft-com:datatypes"><Description dt:dt="string">E-Prime Primary Realtime Clock</Description><StartTime><Timestamp dt:dt="int">0</Timestamp><DateUtc dt:dt="string">2021-10-22T01:50:43Z</DateUtc></StartTime><FrequencyChanges><FrequencyChange><Frequency dt:dt="r8">10000000</Frequency><Timestamp dt:dt="r8">17665795465106</Timestamp><Current dt:…	59.96	1.0.0.17	1	596996450	2.0.10.182	10-22-2021	2021-10-22 01:50:44	09:50:44	2.0.10.92	1	affpro	WordList	1	1	1	113	j	NULL	NULL	NULL	NULL	NULL	NULL	NULL	1	NULL	NULL	NULL	NULL	NULL	NULL	NULL	NULL	3	5	17	pra3	practiceList2	不成熟的	NULL	NULL	NULL	NULL	NULL	NULL	NULL
大创sc-iat	2	1	<?xml version="1.0"?>\n<Clock xmlns:dt="urn:schemas-microsoft-com:datatypes"><Description dt:dt="string">E-Prime Primary Realtime Clock</Description><StartTime><Timestamp dt:dt="int">0</Timestamp><DateUtc dt:dt="string">2021-10-22T01:50:43Z</DateUtc></StartTime><FrequencyChanges><FrequencyChange><Frequency dt:dt="r8">10000000</Frequency><Timestamp dt:dt="r8">17665795465106</Timestamp><Current dt:…	59.96	1.0.0.17	1	596996450	2.0.10.182	10-22-2021	2021-10-22 01:50:44	09:50:44	2.0.10.92	1	affpro	WordList	1	1	1	114	f	NULL	NULL	NULL	NULL	NULL	NULL	NULL	NULL	NULL	NULL	NULL	3	NULL	NULL	NULL	NULL	2	5	18	pra3	practiceList2	高科技的	NULL	NULL	NULL	NULL	NULL	NULL	NULL
大创sc-iat	2	1	<?xml version="1.0"?>\n<Clock xmlns:dt="urn:schemas-microsoft-com:datatypes"><Description dt:dt="string">E-Prime Primary Realtime Clock</Description><StartTime><Timestamp dt:dt="int">0</Timestamp><DateUtc dt:dt="string">2021-10-22T01:50:43Z</DateUtc></StartTime><FrequencyChanges><FrequencyChange><Frequency dt:dt="r8">10000000</Frequency><Timestamp dt:dt="r8">17665795465106</Timestamp><Current dt:…	59.96	1.0.0.17	1	596996450	2.0.10.182	10-22-2021	2021-10-22 01:50:44	09:50:44	2.0.10.92	1	affpro	WordList	1	1	1	115	j	NULL	NULL	NULL	4	NULL	NULL	NULL	NULL	NULL	NULL	NULL	NULL	NULL	NULL	NULL	NULL	1	5	19	pra3	practiceList2	动物转基因	NULL	NULL	NULL	NULL	NULL	NULL	NULL
大创sc-iat	2	1	<?xml version="1.0"?>\n<Clock xmlns:dt="urn:schemas-microsoft-com:datatypes"><Description dt:dt="string">E-Prime Primary Realtime Clock</Description><StartTime><Timestamp dt:dt="int">0</Timestamp><DateUtc dt:dt="string">2021-10-22T01:50:43Z</DateUtc></StartTime><FrequencyChanges><FrequencyChange><Frequency dt:dt="r8">10000000</Frequency><Timestamp dt:dt="r8">17665795465106</Timestamp><Current dt:…	59.96	1.0.0.17	1	596996450	2.0.10.182	10-22-2021	2021-10-22 01:50:44	09:50:44	2.0.10.92	1	affpro	WordList	1	1	1	116	f	NULL	NULL	NULL	NULL	NULL	NULL	NULL	NULL	NULL	NULL	NULL	2	NULL	NULL	NULL	NULL	2	5	20	pra3	practiceList2	高产的	NULL	NULL	NULL	NULL	NULL	NULL	NULL
大创sc-iat	2	1	<?xml version="1.0"?>\n<Clock xmlns:dt="urn:schemas-microsoft-com:datatypes"><Description dt:dt="string">E-Prime Primary Realtime Clock</Description><StartTime><Timestamp dt:dt="int">0</Timestamp><DateUtc dt:dt="string">2021-10-22T01:50:43Z</DateUtc></StartTime><FrequencyChanges><FrequencyChange><Frequency dt:dt="r8">10000000</Frequency><Timestamp dt:dt="r8">17665795465106</Timestamp><Current dt:…	59.96	1.0.0.17	1	596996450	2.0.10.182	10-22-2021	2021-10-22 01:50:44	09:50:44	2.0.10.92	1	affpro	WordList	1	1	1	117	j	NULL	NULL	NULL	2	NULL	NULL	NULL	NULL	NULL	NULL	NULL	NULL	NULL	NULL	NULL	NULL	1	6	21	pra3	practiceList2	抗虫害棉花	NULL	NULL	NULL	NULL	NULL	NULL	NULL
大创sc-iat	2	1	<?xml version="1.0"?>\n<Clock xmlns:dt="urn:schemas-microsoft-com:datatypes"><Description dt:dt="string">E-Prime Primary Realtime Clock</Description><StartTime><Timestamp dt:dt="int">0</Timestamp><DateUtc dt:dt="string">2021-10-22T01:50:43Z</DateUtc></StartTime><FrequencyChanges><FrequencyChange><Frequency dt:dt="r8">10000000</Frequency><Timestamp dt:dt="r8">17665795465106</Timestamp><Current dt:…	59.96	1.0.0.17	1	596996450	2.0.10.182	10-22-2021	2021-10-22 01:50:44	09:50:44	2.0.10.92	1	affpro	WordList	1	1	1	118	f	NULL	NULL	NULL	NULL	NULL	NULL	NULL	NULL	NULL	NULL	NULL	4	NULL	NULL	NULL	NULL	2	6	22	pra3	practiceList2	创新的	NULL	NULL	NULL	NULL	NULL	NULL	NULL
大创sc-iat	2	1	<?xml version="1.0"?>\n<Clock xmlns:dt="urn:schemas-microsoft-com:datatypes"><Description dt:dt="string">E-Prime Primary Realtime Clock</Description><StartTime><Timestamp dt:dt="int">0</Timestamp><DateUtc dt:dt="string">2021-10-22T01:50:43Z</DateUtc></StartTime><FrequencyChanges><FrequencyChange><Frequency dt:dt="r8">10000000</Frequency><Timestamp dt:dt="r8">17665795465106</Timestamp><Current dt:…	59.96	1.0.0.17	1	596996450	2.0.10.182	10-22-2021	2021-10-22 01:50:44	09:50:44	2.0.10.92	1	affpro	WordList	1	1	1	119	f	NULL	NULL	NULL	NULL	NULL	NULL	NULL	NULL	NULL	NULL	NULL	1	NULL	NULL	NULL	NULL	2	6	23	pra3	practiceList2	科学的	NULL	NULL	NULL	NULL	NULL	NULL	NULL
大创sc-iat	2	1	<?xml version="1.0"?>\n<Clock xmlns:dt="urn:schemas-microsoft-com:datatypes"><Description dt:dt="string">E-Prime Primary Realtime Clock</Description><StartTime><Timestamp dt:dt="int">0</Timestamp><DateUtc dt:dt="string">2021-10-22T01:50:43Z</DateUtc></StartTime><FrequencyChanges><FrequencyChange><Frequency dt:dt="r8">10000000</Frequency><Timestamp dt:dt="r8">17665795465106</Timestamp><Current dt:…	59.96	1.0.0.17	1	596996450	2.0.10.182	10-22-2021	2021-10-22 01:50:44	09:50:44	2.0.10.92	1	affpro	WordList	1	1	1	120	j	NULL	NULL	NULL	NULL	NULL	NULL	NULL	3	NULL	NULL	NULL	NULL	NULL	NULL	NULL	NULL	3	6	24	pra3	practiceList2	非天然的	NULL	NULL	NULL	NULL	NULL	NULL	NULL
大创sc-iat	2	1	<?xml version="1.0"?>\n<Clock xmlns:dt="urn:schemas-microsoft-com:datatypes"><Description dt:dt="string">E-Prime Primary Realtime Clock</Description><StartTime><Timestamp dt:dt="int">0</Timestamp><DateUtc dt:dt="string">2021-10-22T01:50:43Z</DateUtc></StartTime><FrequencyChanges><FrequencyChange><Frequency dt:dt="r8">10000000</Frequency><Timestamp dt:dt="r8">17665795465106</Timestamp><Current dt:…	59.96	1.0.0.17	1	596996450	2.0.10.182	10-22-2021	2021-10-22 01:50:44	09:50:44	2.0.10.92	1	affpro	WordList	1	1	1	121	j	NULL	NULL	NULL	NULL	NULL	NULL	NULL	NULL	3	NULL	NULL	NULL	NULL	NULL	NULL	NULL	NULL	NULL	NULL	pra4	taskList2	非天然的	NULL	NULL	NULL	NULL	NULL	NULL	NULL
大创sc-iat	2	1	<?xml version="1.0"?>\n<Clock xmlns:dt="urn:schemas-microsoft-com:datatypes"><Description dt:dt="string">E-Prime Primary Realtime Clock</Description><StartTime><Timestamp dt:dt="int">0</Timestamp><DateUtc dt:dt="string">2021-10-22T01:50:43Z</DateUtc></StartTime><FrequencyChanges><FrequencyChange><Frequency dt:dt="r8">10000000</Frequency><Timestamp dt:dt="r8">17665795465106</Timestamp><Current dt:…	59.96	1.0.0.17	1	596996450	2.0.10.182	10-22-2021	2021-10-22 01:50:44	09:50:44	2.0.10.92	1	affpro	WordList	1	1	1	122	j	NULL	NULL	NULL	NULL	3	NULL	NULL	NULL	NULL	NULL	NULL	NULL	NULL	NULL	NULL	NULL	NULL	NULL	NULL	pra4	taskList2	转基因大豆	NULL	NULL	NULL	NULL	NULL	NULL	NULL
大创sc-iat	2	1	<?xml version="1.0"?>\n<Clock xmlns:dt="urn:schemas-microsoft-com:datatypes"><Description dt:dt="string">E-Prime Primary Realtime Clock</Description><StartTime><Timestamp dt:dt="int">0</Timestamp><DateUtc dt:dt="string">2021-10-22T01:50:43Z</DateUtc></StartTime><FrequencyChanges><FrequencyChange><Frequency dt:dt="r8">10000000</Frequency><Timestamp dt:dt="r8">17665795465106</Timestamp><Current dt:…	59.96	1.0.0.17	1	596996450	2.0.10.182	10-22-2021	2021-10-22 01:50:44	09:50:44	2.0.10.92	1	affpro	WordList	1	1	1	123	f	NULL	NULL	NULL	NULL	NULL	NULL	NULL	NULL	NULL	NULL	NULL	NULL	4	NULL	NULL	NULL	NULL	NULL	NULL	pra4	taskList2	创新的	NULL	NULL	NULL	NULL	NULL	NULL	NULL
大创sc-iat	2	1	<?xml version="1.0"?>\n<Clock xmlns:dt="urn:schemas-microsoft-com:datatypes"><Description dt:dt="string">E-Prime Primary Realtime Clock</Description><StartTime><Timestamp dt:dt="int">0</Timestamp><DateUtc dt:dt="string">2021-10-22T01:50:43Z</DateUtc></StartTime><FrequencyChanges><FrequencyChange><Frequency dt:dt="r8">10000000</Frequency><Timestamp dt:dt="r8">17665795465106</Timestamp><Current dt:…	59.96	1.0.0.17	1	596996450	2.0.10.182	10-22-2021	2021-10-22 01:50:44	09:50:44	2.0.10.92	1	affpro	WordList	1	1	1	124	f	NULL	NULL	NULL	NULL	NULL	NULL	NULL	NULL	NULL	NULL	NULL	NULL	3	NULL	NULL	NULL	NULL	NULL	NULL	pra4	taskList2	高科技的	NULL	NULL	NULL	NULL	NULL	NULL	NULL
大创sc-iat	2	1	<?xml version="1.0"?>\n<Clock xmlns:dt="urn:schemas-microsoft-com:datatypes"><Description dt:dt="string">E-Prime Primary Realtime Clock</Description><StartTime><Timestamp dt:dt="int">0</Timestamp><DateUtc dt:dt="string">2021-10-22T01:50:43Z</DateUtc></StartTime><FrequencyChanges><FrequencyChange><Frequency dt:dt="r8">10000000</Frequency><Timestamp dt:dt="r8">17665795465106</Timestamp><Current dt:…	59.96	1.0.0.17	1	596996450	2.0.10.182	10-22-2021	2021-10-22 01:50:44	09:50:44	2.0.10.92	1	affpro	WordList	1	1	1	125	j	NULL	NULL	NULL	NULL	NULL	NULL	NULL	NULL	4	NULL	NULL	NULL	NULL	NULL	NULL	NULL	NULL	NULL	NULL	pra4	taskList2	有争议的	NULL	NULL	NULL	NULL	NULL	NULL	NULL
大创sc-iat	2	1	<?xml version="1.0"?>\n<Clock xmlns:dt="urn:schemas-microsoft-com:datatypes"><Description dt:dt="string">E-Prime Primary Realtime Clock</Description><StartTime><Timestamp dt:dt="int">0</Timestamp><DateUtc dt:dt="string">2021-10-22T01:50:43Z</DateUtc></StartTime><FrequencyChanges><FrequencyChange><Frequency dt:dt="r8">10000000</Frequency><Timestamp dt:dt="r8">17665795465106</Timestamp><Current dt:…	59.96	1.0.0.17	1	596996450	2.0.10.182	10-22-2021	2021-10-22 01:50:44	09:50:44	2.0.10.92	1	affpro	WordList	1	1	1	126	f	NULL	NULL	NULL	NULL	NULL	NULL	NULL	NULL	NULL	NULL	NULL	NULL	1	NULL	NULL	NULL	NULL	NULL	NULL	pra4	taskList2	科学的	NULL	NULL	NULL	NULL	NULL	NULL	NULL
大创sc-iat	2	1	<?xml version="1.0"?>\n<Clock xmlns:dt="urn:schemas-microsoft-com:datatypes"><Description dt:dt="string">E-Prime Primary Realtime Clock</Description><StartTime><Timestamp dt:dt="int">0</Timestamp><DateUtc dt:dt="string">2021-10-22T01:50:43Z</DateUtc></StartTime><FrequencyChanges><FrequencyChange><Frequency dt:dt="r8">10000000</Frequency><Timestamp dt:dt="r8">17665795465106</Timestamp><Current dt:…	59.96	1.0.0.17	1	596996450	2.0.10.182	10-22-2021	2021-10-22 01:50:44	09:50:44	2.0.10.92	1	affpro	WordList	1	1	1	127	f	NULL	NULL	NULL	NULL	NULL	NULL	NULL	NULL	NULL	NULL	NULL	NULL	2	NULL	NULL	NULL	NULL	NULL	NULL	pra4	taskList2	高产的	NULL	NULL	NULL	NULL	NULL	NULL	NULL
大创sc-iat	2	1	<?xml version="1.0"?>\n<Clock xmlns:dt="urn:schemas-microsoft-com:datatypes"><Description dt:dt="string">E-Prime Primary Realtime Clock</Description><StartTime><Timestamp dt:dt="int">0</Timestamp><DateUtc dt:dt="string">2021-10-22T01:50:43Z</DateUtc></StartTime><FrequencyChanges><FrequencyChange><Frequency dt:dt="r8">10000000</Frequency><Timestamp dt:dt="r8">17665795465106</Timestamp><Current dt:…	59.96	1.0.0.17	1	596996450	2.0.10.182	10-22-2021	2021-10-22 01:50:44	09:50:44	2.0.10.92	1	affpro	WordList	1	1	1	128	j	NULL	NULL	NULL	NULL	2	NULL	NULL	NULL	NULL	NULL	NULL	NULL	NULL	NULL	NULL	NULL	NULL	NULL	NULL	pra4	taskList2	抗虫害棉花	NULL	NULL	NULL	NULL	NULL	NULL	NULL
大创sc-iat	2	1	<?xml version="1.0"?>\n<Clock xmlns:dt="urn:schemas-microsoft-com:datatypes"><Description dt:dt="string">E-Prime Primary Realtime Clock</Description><StartTime><Timestamp dt:dt="int">0</Timestamp><DateUtc dt:dt="string">2021-10-22T01:50:43Z</DateUtc></StartTime><FrequencyChanges><FrequencyChange><Frequency dt:dt="r8">10000000</Frequency><Timestamp dt:dt="r8">17665795465106</Timestamp><Current dt:…	59.96	1.0.0.17	1	596996450	2.0.10.182	10-22-2021	2021-10-22 01:50:44	09:50:44	2.0.10.92	1	affpro	WordList	1	1	1	129	j	NULL	NULL	NULL	NULL	NULL	NULL	NULL	NULL	2	NULL	NULL	NULL	NULL	NULL	NULL	NULL	NULL	NULL	NULL	pra4	taskList2	高风险的	NULL	NULL	NULL	NULL	NULL	NULL	NULL
大创sc-iat	2	1	<?xml version="1.0"?>\n<Clock xmlns:dt="urn:schemas-microsoft-com:datatypes"><Description dt:dt="string">E-Prime Primary Realtime Clock</Description><StartTime><Timestamp dt:dt="int">0</Timestamp><DateUtc dt:dt="string">2021-10-22T01:50:43Z</DateUtc></StartTime><FrequencyChanges><FrequencyChange><Frequency dt:dt="r8">10000000</Frequency><Timestamp dt:dt="r8">17665795465106</Timestamp><Current dt:…	59.96	1.0.0.17	1	596996450	2.0.10.182	10-22-2021	2021-10-22 01:50:44	09:50:44	2.0.10.92	1	affpro	WordList	1	1	1	130	f	NULL	NULL	NULL	NULL	NULL	NULL	NULL	NULL	NULL	NULL	NULL	NULL	4	NULL	NULL	NULL	NULL	NULL	NULL	pra4	taskList2	创新的	NULL	NULL	NULL	NULL	NULL	NULL	NULL
大创sc-iat	2	1	<?xml version="1.0"?>\n<Clock xmlns:dt="urn:schemas-microsoft-com:datatypes"><Description dt:dt="string">E-Prime Primary Realtime Clock</Description><StartTime><Timestamp dt:dt="int">0</Timestamp><DateUtc dt:dt="string">2021-10-22T01:50:43Z</DateUtc></StartTime><FrequencyChanges><FrequencyChange><Frequency dt:dt="r8">10000000</Frequency><Timestamp dt:dt="r8">17665795465106</Timestamp><Current dt:…	59.96	1.0.0.17	1	596996450	2.0.10.182	10-22-2021	2021-10-22 01:50:44	09:50:44	2.0.10.92	1	affpro	WordList	1	1	1	131	f	NULL	NULL	NULL	NULL	NULL	NULL	NULL	NULL	NULL	NULL	NULL	NULL	1	NULL	NULL	NULL	NULL	NULL	NULL	pra4	taskList2	科学的	NULL	NULL	NULL	NULL	NULL	NULL	NULL
大创sc-iat	2	1	<?xml version="1.0"?>\n<Clock xmlns:dt="urn:schemas-microsoft-com:datatypes"><Description dt:dt="string">E-Prime Primary Realtime Clock</Description><StartTime><Timestamp dt:dt="int">0</Timestamp><DateUtc dt:dt="string">2021-10-22T01:50:43Z</DateUtc></StartTime><FrequencyChanges><FrequencyChange><Frequency dt:dt="r8">10000000</Frequency><Timestamp dt:dt="r8">17665795465106</Timestamp><Current dt:…	59.96	1.0.0.17	1	596996450	2.0.10.182	10-22-2021	2021-10-22 01:50:44	09:50:44	2.0.10.92	1	affpro	WordList	1	1	1	132	j	NULL	NULL	NULL	NULL	4	NULL	NULL	NULL	NULL	NULL	NULL	NULL	NULL	NULL	NULL	NULL	NULL	NULL	NULL	pra4	taskList2	动物转基因	NULL	NULL	NULL	NULL	NULL	NULL	NULL
大创sc-iat	2	1	<?xml version="1.0"?>\n<Clock xmlns:dt="urn:schemas-microsoft-com:datatypes"><Description dt:dt="string">E-Prime Primary Realtime Clock</Description><StartTime><Timestamp dt:dt="int">0</Timestamp><DateUtc dt:dt="string">2021-10-22T01:50:43Z</DateUtc></StartTime><FrequencyChanges><FrequencyChange><Frequency dt:dt="r8">10000000</Frequency><Timestamp dt:dt="r8">17665795465106</Timestamp><Current dt:…	59.96	1.0.0.17	1	596996450	2.0.10.182	10-22-2021	2021-10-22 01:50:44	09:50:44	2.0.10.92	1	affpro	WordList	1	1	1	133	f	NULL	NULL	NULL	NULL	NULL	NULL	NULL	NULL	NULL	NULL	NULL	NULL	3	NULL	NULL	NULL	NULL	NULL	NULL	pra4	taskList2	高科技的	NULL	NULL	NULL	NULL	NULL	NULL	NULL
大创sc-iat	2	1	<?xml version="1.0"?>\n<Clock xmlns:dt="urn:schemas-microsoft-com:datatypes"><Description dt:dt="string">E-Prime Primary Realtime Clock</Description><StartTime><Timestamp dt:dt="int">0</Timestamp><DateUtc dt:dt="string">2021-10-22T01:50:43Z</DateUtc></StartTime><FrequencyChanges><FrequencyChange><Frequency dt:dt="r8">10000000</Frequency><Timestamp dt:dt="r8">17665795465106</Timestamp><Current dt:…	59.96	1.0.0.17	1	596996450	2.0.10.182	10-22-2021	2021-10-22 01:50:44	09:50:44	2.0.10.92	1	affpro	WordList	1	1	1	134	j	NULL	NULL	NULL	NULL	NULL	NULL	NULL	NULL	1	NULL	NULL	NULL	NULL	NULL	NULL	NULL	NULL	NULL	NULL	pra4	taskList2	不成熟的	NULL	NULL	NULL	NULL	NULL	NULL	NULL
大创sc-iat	2	1	<?xml version="1.0"?>\n<Clock xmlns:dt="urn:schemas-microsoft-com:datatypes"><Description dt:dt="string">E-Prime Primary Realtime Clock</Description><StartTime><Timestamp dt:dt="int">0</Timestamp><DateUtc dt:dt="string">2021-10-22T01:50:43Z</DateUtc></StartTime><FrequencyChanges><FrequencyChange><Frequency dt:dt="r8">10000000</Frequency><Timestamp dt:dt="r8">17665795465106</Timestamp><Current dt:…	59.96	1.0.0.17	1	596996450	2.0.10.182	10-22-2021	2021-10-22 01:50:44	09:50:44	2.0.10.92	1	affpro	WordList	1	1	1	135	f	NULL	NULL	NULL	NULL	NULL	NULL	NULL	NULL	NULL	NULL	NULL	NULL	2	NULL	NULL	NULL	NULL	NULL	NULL	pra4	taskList2	高产的	NULL	NULL	NULL	NULL	NULL	NULL	NULL
大创sc-iat	2	1	<?xml version="1.0"?>\n<Clock xmlns:dt="urn:schemas-microsoft-com:datatypes"><Description dt:dt="string">E-Prime Primary Realtime Clock</Description><StartTime><Timestamp dt:dt="int">0</Timestamp><DateUtc dt:dt="string">2021-10-22T01:50:43Z</DateUtc></StartTime><FrequencyChanges><FrequencyChange><Frequency dt:dt="r8">10000000</Frequency><Timestamp dt:dt="r8">17665795465106</Timestamp><Current dt:…	59.96	1.0.0.17	1	596996450	2.0.10.182	10-22-2021	2021-10-22 01:50:44	09:50:44	2.0.10.92	1	affpro	WordList	1	1	1	136	j	NULL	NULL	NULL	NULL	1	NULL	NULL	NULL	NULL	NULL	NULL	NULL	NULL	NULL	NULL	NULL	NULL	NULL	NULL	pra4	taskList2	转基因食物	NULL	NULL	NULL	NULL	NULL	NULL	NULL
大创sc-iat	2	1	<?xml version="1.0"?>\n<Clock xmlns:dt="urn:schemas-microsoft-com:datatypes"><Description dt:dt="string">E-Prime Primary Realtime Clock</Description><StartTime><Timestamp dt:dt="int">0</Timestamp><DateUtc dt:dt="string">2021-10-22T01:50:43Z</DateUtc></StartTime><FrequencyChanges><FrequencyChange><Frequency dt:dt="r8">10000000</Frequency><Timestamp dt:dt="r8">17665795465106</Timestamp><Current dt:…	59.96	1.0.0.17	1	596996450	2.0.10.182	10-22-2021	2021-10-22 01:50:44	09:50:44	2.0.10.92	1	affpro	WordList	1	1	1	137	f	NULL	NULL	NULL	NULL	NULL	NULL	NULL	NULL	NULL	NULL	NULL	NULL	4	NULL	NULL	NULL	NULL	NULL	NULL	pra4	taskList2	创新的	NULL	NULL	NULL	NULL	NULL	NULL	NULL
大创sc-iat	2	1	<?xml version="1.0"?>\n<Clock xmlns:dt="urn:schemas-microsoft-com:datatypes"><Description dt:dt="string">E-Prime Primary Realtime Clock</Description><StartTime><Timestamp dt:dt="int">0</Timestamp><DateUtc dt:dt="string">2021-10-22T01:50:43Z</DateUtc></StartTime><FrequencyChanges><FrequencyChange><Frequency dt:dt="r8">10000000</Frequency><Timestamp dt:dt="r8">17665795465106</Timestamp><Current dt:…	59.96	1.0.0.17	1	596996450	2.0.10.182	10-22-2021	2021-10-22 01:50:44	09:50:44	2.0.10.92	1	affpro	WordList	1	1	1	138	f	NULL	NULL	NULL	NULL	NULL	NULL	NULL	NULL	NULL	NULL	NULL	NULL	1	NULL	NULL	NULL	NULL	NULL	NULL	pra4	taskList2	科学的	NULL	NULL	NULL	NULL	NULL	NULL	NULL
大创sc-iat	2	1	<?xml version="1.0"?>\n<Clock xmlns:dt="urn:schemas-microsoft-com:datatypes"><Description dt:dt="string">E-Prime Primary Realtime Clock</Description><StartTime><Timestamp dt:dt="int">0</Timestamp><DateUtc dt:dt="string">2021-10-22T01:50:43Z</DateUtc></StartTime><FrequencyChanges><FrequencyChange><Frequency dt:dt="r8">10000000</Frequency><Timestamp dt:dt="r8">17665795465106</Timestamp><Current dt:…	59.96	1.0.0.17	1	596996450	2.0.10.182	10-22-2021	2021-10-22 01:50:44	09:50:44	2.0.10.92	1	affpro	WordList	1	1	1	139	j	NULL	NULL	NULL	NULL	NULL	NULL	NULL	NULL	3	NULL	NULL	NULL	NULL	NULL	NULL	NULL	NULL	NULL	NULL	pra4	taskList2	非天然的	NULL	NULL	NULL	NULL	NULL	NULL	NULL
大创sc-iat	2	1	<?xml version="1.0"?>\n<Clock xmlns:dt="urn:schemas-microsoft-com:datatypes"><Description dt:dt="string">E-Prime Primary Realtime Clock</Description><StartTime><Timestamp dt:dt="int">0</Timestamp><DateUtc dt:dt="string">2021-10-22T01:50:43Z</DateUtc></StartTime><FrequencyChanges><FrequencyChange><Frequency dt:dt="r8">10000000</Frequency><Timestamp dt:dt="r8">17665795465106</Timestamp><Current dt:…	59.96	1.0.0.17	1	596996450	2.0.10.182	10-22-2021	2021-10-22 01:50:44	09:50:44	2.0.10.92	1	affpro	WordList	1	1	1	140	j	NULL	NULL	NULL	NULL	3	NULL	NULL	NULL	NULL	NULL	NULL	NULL	NULL	NULL	NULL	NULL	NULL	NULL	NULL	pra4	taskList2	转基因大豆	NULL	NULL	NULL	NULL	NULL	NULL	NULL
大创sc-iat	2	1	<?xml version="1.0"?>\n<Clock xmlns:dt="urn:schemas-microsoft-com:datatypes"><Description dt:dt="string">E-Prime Primary Realtime Clock</Description><StartTime><Timestamp dt:dt="int">0</Timestamp><DateUtc dt:dt="string">2021-10-22T01:50:43Z</DateUtc></StartTime><FrequencyChanges><FrequencyChange><Frequency dt:dt="r8">10000000</Frequency><Timestamp dt:dt="r8">17665795465106</Timestamp><Current dt:…	59.96	1.0.0.17	1	596996450	2.0.10.182	10-22-2021	2021-10-22 01:50:44	09:50:44	2.0.10.92	1	affpro	WordList	1	1	1	141	f	NULL	NULL	NULL	NULL	NULL	NULL	NULL	NULL	NULL	NULL	NULL	NULL	3	NULL	NULL	NULL	NULL	NULL	NULL	pra4	taskList2	高科技的	NULL	NULL	NULL	NULL	NULL	NULL	NULL
大创sc-iat	2	1	<?xml version="1.0"?>\n<Clock xmlns:dt="urn:schemas-microsoft-com:datatypes"><Description dt:dt="string">E-Prime Primary Realtime Clock</Description><StartTime><Timestamp dt:dt="int">0</Timestamp><DateUtc dt:dt="string">2021-10-22T01:50:43Z</DateUtc></StartTime><FrequencyChanges><FrequencyChange><Frequency dt:dt="r8">10000000</Frequency><Timestamp dt:dt="r8">17665795465106</Timestamp><Current dt:…	59.96	1.0.0.17	1	596996450	2.0.10.182	10-22-2021	2021-10-22 01:50:44	09:50:44	2.0.10.92	1	affpro	WordList	1	1	1	142	j	NULL	NULL	NULL	NULL	NULL	NULL	NULL	NULL	4	NULL	NULL	NULL	NULL	NULL	NULL	NULL	NULL	NULL	NULL	pra4	taskList2	有争议的	NULL	NULL	NULL	NULL	NULL	NULL	NULL
大创sc-iat	2	1	<?xml version="1.0"?>\n<Clock xmlns:dt="urn:schemas-microsoft-com:datatypes"><Description dt:dt="string">E-Prime Primary Realtime Clock</Description><StartTime><Timestamp dt:dt="int">0</Timestamp><DateUtc dt:dt="string">2021-10-22T01:50:43Z</DateUtc></StartTime><FrequencyChanges><FrequencyChange><Frequency dt:dt="r8">10000000</Frequency><Timestamp dt:dt="r8">17665795465106</Timestamp><Current dt:…	59.96	1.0.0.17	1	596996450	2.0.10.182	10-22-2021	2021-10-22 01:50:44	09:50:44	2.0.10.92	1	affpro	WordList	1	1	1	143	j	NULL	NULL	NULL	NULL	4	NULL	NULL	NULL	NULL	NULL	NULL	NULL	NULL	NULL	NULL	NULL	NULL	NULL	NULL	pra4	taskList2	动物转基因	NULL	NULL	NULL	NULL	NULL	NULL	NULL
大创sc-iat	2	1	<?xml version="1.0"?>\n<Clock xmlns:dt="urn:schemas-microsoft-com:datatypes"><Description dt:dt="string">E-Prime Primary Realtime Clock</Description><StartTime><Timestamp dt:dt="int">0</Timestamp><DateUtc dt:dt="string">2021-10-22T01:50:43Z</DateUtc></StartTime><FrequencyChanges><FrequencyChange><Frequency dt:dt="r8">10000000</Frequency><Timestamp dt:dt="r8">17665795465106</Timestamp><Current dt:…	59.96	1.0.0.17	1	596996450	2.0.10.182	10-22-2021	2021-10-22 01:50:44	09:50:44	2.0.10.92	1	affpro	WordList	1	1	1	144	f	NULL	NULL	NULL	NULL	NULL	NULL	NULL	NULL	NULL	NULL	NULL	NULL	2	NULL	NULL	NULL	NULL	NULL	NULL	pra4	taskList2	高产的	NULL	NULL	NULL	NULL	NULL	NULL	NULL
大创sc-iat	2	1	<?xml version="1.0"?>\n<Clock xmlns:dt="urn:schemas-microsoft-com:datatypes"><Description dt:dt="string">E-Prime Primary Realtime Clock</Description><StartTime><Timestamp dt:dt="int">0</Timestamp><DateUtc dt:dt="string">2021-10-22T01:50:43Z</DateUtc></StartTime><FrequencyChanges><FrequencyChange><Frequency dt:dt="r8">10000000</Frequency><Timestamp dt:dt="r8">17665795465106</Timestamp><Current dt:…	59.96	1.0.0.17	1	596996450	2.0.10.182	10-22-2021	2021-10-22 01:50:44	09:50:44	2.0.10.92	1	affpro	WordList	1	1	1	145	j	NULL	NULL	NULL	NULL	1	NULL	NULL	NULL	NULL	NULL	NULL	NULL	NULL	NULL	NULL	NULL	NULL	NULL	NULL	pra4	taskList2	转基因食物	NULL	NULL	NULL	NULL	NULL	NULL	NULL
大创sc-iat	2	1	<?xml version="1.0"?>\n<Clock xmlns:dt="urn:schemas-microsoft-com:datatypes"><Description dt:dt="string">E-Prime Primary Realtime Clock</Description><StartTime><Timestamp dt:dt="int">0</Timestamp><DateUtc dt:dt="string">2021-10-22T01:50:43Z</DateUtc></StartTime><FrequencyChanges><FrequencyChange><Frequency dt:dt="r8">10000000</Frequency><Timestamp dt:dt="r8">17665795465106</Timestamp><Current dt:…	59.96	1.0.0.17	1	596996450	2.0.10.182	10-22-2021	2021-10-22 01:50:44	09:50:44	2.0.10.92	1	affpro	WordList	1	1	1	146	j	NULL	NULL	NULL	NULL	NULL	NULL	NULL	NULL	2	NULL	NULL	NULL	NULL	NULL	NULL	NULL	NULL	NULL	NULL	pra4	taskList2	高风险的	NULL	NULL	NULL	NULL	NULL	NULL	NULL
大创sc-iat	2	1	<?xml version="1.0"?>\n<Clock xmlns:dt="urn:schemas-microsoft-com:datatypes"><Description dt:dt="string">E-Prime Primary Realtime Clock</Description><StartTime><Timestamp dt:dt="int">0</Timestamp><DateUtc dt:dt="string">2021-10-22T01:50:43Z</DateUtc></StartTime><FrequencyChanges><FrequencyChange><Frequency dt:dt="r8">10000000</Frequency><Timestamp dt:dt="r8">17665795465106</Timestamp><Current dt:…	59.96	1.0.0.17	1	596996450	2.0.10.182	10-22-2021	2021-10-22 01:50:44	09:50:44	2.0.10.92	1	affpro	WordList	1	1	1	147	f	NULL	NULL	NULL	NULL	NULL	NULL	NULL	NULL	NULL	NULL	NULL	NULL	3	NULL	NULL	NULL	NULL	NULL	NULL	pra4	taskList2	高科技的	NULL	NULL	NULL	NULL	NULL	NULL	NULL
大创sc-iat	2	1	<?xml version="1.0"?>\n<Clock xmlns:dt="urn:schemas-microsoft-com:datatypes"><Description dt:dt="string">E-Prime Primary Realtime Clock</Description><StartTime><Timestamp dt:dt="int">0</Timestamp><DateUtc dt:dt="string">2021-10-22T01:50:43Z</DateUtc></StartTime><FrequencyChanges><FrequencyChange><Frequency dt:dt="r8">10000000</Frequency><Timestamp dt:dt="r8">17665795465106</Timestamp><Current dt:…	59.96	1.0.0.17	1	596996450	2.0.10.182	10-22-2021	2021-10-22 01:50:44	09:50:44	2.0.10.92	1	affpro	WordList	1	1	1	148	f	NULL	NULL	NULL	NULL	NULL	NULL	NULL	NULL	NULL	NULL	NULL	NULL	2	NULL	NULL	NULL	NULL	NULL	NULL	pra4	taskList2	高产的	NULL	NULL	NULL	NULL	NULL	NULL	NULL
大创sc-iat	2	1	<?xml version="1.0"?>\n<Clock xmlns:dt="urn:schemas-microsoft-com:datatypes"><Description dt:dt="string">E-Prime Primary Realtime Clock</Description><StartTime><Timestamp dt:dt="int">0</Timestamp><DateUtc dt:dt="string">2021-10-22T01:50:43Z</DateUtc></StartTime><FrequencyChanges><FrequencyChange><Frequency dt:dt="r8">10000000</Frequency><Timestamp dt:dt="r8">17665795465106</Timestamp><Current dt:…	59.96	1.0.0.17	1	596996450	2.0.10.182	10-22-2021	2021-10-22 01:50:44	09:50:44	2.0.10.92	1	affpro	WordList	1	1	1	149	j	NULL	NULL	NULL	NULL	NULL	NULL	NULL	NULL	1	NULL	NULL	NULL	NULL	NULL	NULL	NULL	NULL	NULL	NULL	pra4	taskList2	不成熟的	NULL	NULL	NULL	NULL	NULL	NULL	NULL
大创sc-iat	2	1	<?xml version="1.0"?>\n<Clock xmlns:dt="urn:schemas-microsoft-com:datatypes"><Description dt:dt="string">E-Prime Primary Realtime Clock</Description><StartTime><Timestamp dt:dt="int">0</Timestamp><DateUtc dt:dt="string">2021-10-22T01:50:43Z</DateUtc></StartTime><FrequencyChanges><FrequencyChange><Frequency dt:dt="r8">10000000</Frequency><Timestamp dt:dt="r8">17665795465106</Timestamp><Current dt:…	59.96	1.0.0.17	1	596996450	2.0.10.182	10-22-2021	2021-10-22 01:50:44	09:50:44	2.0.10.92	1	affpro	WordList	1	1	1	150	f	NULL	NULL	NULL	NULL	NULL	NULL	NULL	NULL	NULL	NULL	NULL	NULL	4	NULL	NULL	NULL	NULL	NULL	NULL	pra4	taskList2	创新的	NULL	NULL	NULL	NULL	NULL	NULL	NULL
大创sc-iat	2	1	<?xml version="1.0"?>\n<Clock xmlns:dt="urn:schemas-microsoft-com:datatypes"><Description dt:dt="string">E-Prime Primary Realtime Clock</Description><StartTime><Timestamp dt:dt="int">0</Timestamp><DateUtc dt:dt="string">2021-10-22T01:50:43Z</DateUtc></StartTime><FrequencyChanges><FrequencyChange><Frequency dt:dt="r8">10000000</Frequency><Timestamp dt:dt="r8">17665795465106</Timestamp><Current dt:…	59.96	1.0.0.17	1	596996450	2.0.10.182	10-22-2021	2021-10-22 01:50:44	09:50:44	2.0.10.92	1	affpro	WordList	1	1	1	151	f	NULL	NULL	NULL	NULL	NULL	NULL	NULL	NULL	NULL	NULL	NULL	NULL	1	NULL	NULL	NULL	NULL	NULL	NULL	pra4	taskList2	科学的	NULL	NULL	NULL	NULL	NULL	NULL	NULL
大创sc-iat	2	1	<?xml version="1.0"?>\n<Clock xmlns:dt="urn:schemas-microsoft-com:datatypes"><Description dt:dt="string">E-Prime Primary Realtime Clock</Description><StartTime><Timestamp dt:dt="int">0</Timestamp><DateUtc dt:dt="string">2021-10-22T01:50:43Z</DateUtc></StartTime><FrequencyChanges><FrequencyChange><Frequency dt:dt="r8">10000000</Frequency><Timestamp dt:dt="r8">17665795465106</Timestamp><Current dt:…	59.96	1.0.0.17	1	596996450	2.0.10.182	10-22-2021	2021-10-22 01:50:44	09:50:44	2.0.10.92	1	affpro	WordList	1	1	1	152	j	NULL	NULL	NULL	NULL	2	NULL	NULL	NULL	NULL	NULL	NULL	NULL	NULL	NULL	NULL	NULL	NULL	NULL	NULL	pra4	taskList2	抗虫害棉花	NULL	NULL	NULL	NULL	NULL	NULL	NULL
大创sc-iat	2	1	<?xml version="1.0"?>\n<Clock xmlns:dt="urn:schemas-microsoft-com:datatypes"><Description dt:dt="string">E-Prime Primary Realtime Clock</Description><StartTime><Timestamp dt:dt="int">0</Timestamp><DateUtc dt:dt="string">2021-10-22T01:50:43Z</DateUtc></StartTime><FrequencyChanges><FrequencyChange><Frequency dt:dt="r8">10000000</Frequency><Timestamp dt:dt="r8">17665795465106</Timestamp><Current dt:…	59.96	1.0.0.17	1	596996450	2.0.10.182	10-22-2021	2021-10-22 01:50:44	09:50:44	2.0.10.92	1	affpro	WordList	1	1	1	153	f	NULL	NULL	NULL	NULL	NULL	NULL	NULL	NULL	NULL	NULL	NULL	NULL	4	NULL	NULL	NULL	NULL	NULL	NULL	pra4	taskList2	创新的	NULL	NULL	NULL	NULL	NULL	NULL	NULL
大创sc-iat	2	1	<?xml version="1.0"?>\n<Clock xmlns:dt="urn:schemas-microsoft-com:datatypes"><Description dt:dt="string">E-Prime Primary Realtime Clock</Description><StartTime><Timestamp dt:dt="int">0</Timestamp><DateUtc dt:dt="string">2021-10-22T01:50:43Z</DateUtc></StartTime><FrequencyChanges><FrequencyChange><Frequency dt:dt="r8">10000000</Frequency><Timestamp dt:dt="r8">17665795465106</Timestamp><Current dt:…	59.96	1.0.0.17	1	596996450	2.0.10.182	10-22-2021	2021-10-22 01:50:44	09:50:44	2.0.10.92	1	affpro	WordList	1	1	1	154	j	NULL	NULL	NULL	NULL	NULL	NULL	NULL	NULL	3	NULL	NULL	NULL	NULL	NULL	NULL	NULL	NULL	NULL	NULL	pra4	taskList2	非天然的	NULL	NULL	NULL	NULL	NULL	NULL	NULL
大创sc-iat	2	1	<?xml version="1.0"?>\n<Clock xmlns:dt="urn:schemas-microsoft-com:datatypes"><Description dt:dt="string">E-Prime Primary Realtime Clock</Description><StartTime><Timestamp dt:dt="int">0</Timestamp><DateUtc dt:dt="string">2021-10-22T01:50:43Z</DateUtc></StartTime><FrequencyChanges><FrequencyChange><Frequency dt:dt="r8">10000000</Frequency><Timestamp dt:dt="r8">17665795465106</Timestamp><Current dt:…	59.96	1.0.0.17	1	596996450	2.0.10.182	10-22-2021	2021-10-22 01:50:44	09:50:44	2.0.10.92	1	affpro	WordList	1	1	1	155	f	NULL	NULL	NULL	NULL	NULL	NULL	NULL	NULL	NULL	NULL	NULL	NULL	1	NULL	NULL	NULL	NULL	NULL	NULL	pra4	taskList2	科学的	NULL	NULL	NULL	NULL	NULL	NULL	NULL
大创sc-iat	2	1	<?xml version="1.0"?>\n<Clock xmlns:dt="urn:schemas-microsoft-com:datatypes"><Description dt:dt="string">E-Prime Primary Realtime Clock</Description><StartTime><Timestamp dt:dt="int">0</Timestamp><DateUtc dt:dt="string">2021-10-22T01:50:43Z</DateUtc></StartTime><FrequencyChanges><FrequencyChange><Frequency dt:dt="r8">10000000</Frequency><Timestamp dt:dt="r8">17665795465106</Timestamp><Current dt:…	59.96	1.0.0.17	1	596996450	2.0.10.182	10-22-2021	2021-10-22 01:50:44	09:50:44	2.0.10.92	1	affpro	WordList	1	1	1	156	j	NULL	NULL	NULL	NULL	1	NULL	NULL	NULL	NULL	NULL	NULL	NULL	NULL	NULL	NULL	NULL	NULL	NULL	NULL	pra4	taskList2	转基因食物	NULL	NULL	NULL	NULL	NULL	NULL	NULL
大创sc-iat	2	1	<?xml version="1.0"?>\n<Clock xmlns:dt="urn:schemas-microsoft-com:datatypes"><Description dt:dt="string">E-Prime Primary Realtime Clock</Description><StartTime><Timestamp dt:dt="int">0</Timestamp><DateUtc dt:dt="string">2021-10-22T01:50:43Z</DateUtc></StartTime><FrequencyChanges><FrequencyChange><Frequency dt:dt="r8">10000000</Frequency><Timestamp dt:dt="r8">17665795465106</Timestamp><Current dt:…	59.96	1.0.0.17	1	596996450	2.0.10.182	10-22-2021	2021-10-22 01:50:44	09:50:44	2.0.10.92	1	affpro	WordList	1	1	1	157	j	NULL	NULL	NULL	NULL	NULL	NULL	NULL	NULL	2	NULL	NULL	NULL	NULL	NULL	NULL	NULL	NULL	NULL	NULL	pra4	taskList2	高风险的	NULL	NULL	NULL	NULL	NULL	NULL	NULL
大创sc-iat	2	1	<?xml version="1.0"?>\n<Clock xmlns:dt="urn:schemas-microsoft-com:datatypes"><Description dt:dt="string">E-Prime Primary Realtime Clock</Description><StartTime><Timestamp dt:dt="int">0</Timestamp><DateUtc dt:dt="string">2021-10-22T01:50:43Z</DateUtc></StartTime><FrequencyChanges><FrequencyChange><Frequency dt:dt="r8">10000000</Frequency><Timestamp dt:dt="r8">17665795465106</Timestamp><Current dt:…	59.96	1.0.0.17	1	596996450	2.0.10.182	10-22-2021	2021-10-22 01:50:44	09:50:44	2.0.10.92	1	affpro	WordList	1	1	1	158	j	NULL	NULL	NULL	NULL	3	NULL	NULL	NULL	NULL	NULL	NULL	NULL	NULL	NULL	NULL	NULL	NULL	NULL	NULL	pra4	taskList2	转基因大豆	NULL	NULL	NULL	NULL	NULL	NULL	NULL
大创sc-iat	2	1	<?xml version="1.0"?>\n<Clock xmlns:dt="urn:schemas-microsoft-com:datatypes"><Description dt:dt="string">E-Prime Primary Realtime Clock</Description><StartTime><Timestamp dt:dt="int">0</Timestamp><DateUtc dt:dt="string">2021-10-22T01:50:43Z</DateUtc></StartTime><FrequencyChanges><FrequencyChange><Frequency dt:dt="r8">10000000</Frequency><Timestamp dt:dt="r8">17665795465106</Timestamp><Current dt:…	59.96	1.0.0.17	1	596996450	2.0.10.182	10-22-2021	2021-10-22 01:50:44	09:50:44	2.0.10.92	1	affpro	WordList	1	1	1	159	f	NULL	NULL	NULL	NULL	NULL	NULL	NULL	NULL	NULL	NULL	NULL	NULL	2	NULL	NULL	NULL	NULL	NULL	NULL	pra4	taskList2	高产的	NULL	NULL	NULL	NULL	NULL	NULL	NULL
大创sc-iat	2	1	<?xml version="1.0"?>\n<Clock xmlns:dt="urn:schemas-microsoft-com:datatypes"><Description dt:dt="string">E-Prime Primary Realtime Clock</Description><StartTime><Timestamp dt:dt="int">0</Timestamp><DateUtc dt:dt="string">2021-10-22T01:50:43Z</DateUtc></StartTime><FrequencyChanges><FrequencyChange><Frequency dt:dt="r8">10000000</Frequency><Timestamp dt:dt="r8">17665795465106</Timestamp><Current dt:…	59.96	1.0.0.17	1	596996450	2.0.10.182	10-22-2021	2021-10-22 01:50:44	09:50:44	2.0.10.92	1	affpro	WordList	1	1	1	160	f	NULL	NULL	NULL	NULL	NULL	NULL	NULL	NULL	NULL	NULL	NULL	NULL	3	NULL	NULL	NULL	NULL	NULL	NULL	pra4	taskList2	高科技的	NULL	NULL	NULL	NULL	NULL	NULL	NULL
大创sc-iat	2	1	<?xml version="1.0"?>\n<Clock xmlns:dt="urn:schemas-microsoft-com:datatypes"><Description dt:dt="string">E-Prime Primary Realtime Clock</Description><StartTime><Timestamp dt:dt="int">0</Timestamp><DateUtc dt:dt="string">2021-10-22T01:50:43Z</DateUtc></StartTime><FrequencyChanges><FrequencyChange><Frequency dt:dt="r8">10000000</Frequency><Timestamp dt:dt="r8">17665795465106</Timestamp><Current dt:…	59.96	1.0.0.17	1	596996450	2.0.10.182	10-22-2021	2021-10-22 01:50:44	09:50:44	2.0.10.92	1	affpro	WordList	1	1	1	161	j	NULL	NULL	NULL	NULL	NULL	NULL	NULL	NULL	1	NULL	NULL	NULL	NULL	NULL	NULL	NULL	NULL	NULL	NULL	pra4	taskList2	不成熟的	NULL	NULL	NULL	NULL	NULL	NULL	NULL
大创sc-iat	2	1	<?xml version="1.0"?>\n<Clock xmlns:dt="urn:schemas-microsoft-com:datatypes"><Description dt:dt="string">E-Prime Primary Realtime Clock</Description><StartTime><Timestamp dt:dt="int">0</Timestamp><DateUtc dt:dt="string">2021-10-22T01:50:43Z</DateUtc></StartTime><FrequencyChanges><FrequencyChange><Frequency dt:dt="r8">10000000</Frequency><Timestamp dt:dt="r8">17665795465106</Timestamp><Current dt:…	59.96	1.0.0.17	1	596996450	2.0.10.182	10-22-2021	2021-10-22 01:50:44	09:50:44	2.0.10.92	1	affpro	WordList	1	1	1	162	f	NULL	NULL	NULL	NULL	NULL	NULL	NULL	NULL	NULL	NULL	NULL	NULL	4	NULL	NULL	NULL	NULL	NULL	NULL	pra4	taskList2	创新的	NULL	NULL	NULL	NULL	NULL	NULL	NULL
大创sc-iat	2	1	<?xml version="1.0"?>\n<Clock xmlns:dt="urn:schemas-microsoft-com:datatypes"><Description dt:dt="string">E-Prime Primary Realtime Clock</Description><StartTime><Timestamp dt:dt="int">0</Timestamp><DateUtc dt:dt="string">2021-10-22T01:50:43Z</DateUtc></StartTime><FrequencyChanges><FrequencyChange><Frequency dt:dt="r8">10000000</Frequency><Timestamp dt:dt="r8">17665795465106</Timestamp><Current dt:…	59.96	1.0.0.17	1	596996450	2.0.10.182	10-22-2021	2021-10-22 01:50:44	09:50:44	2.0.10.92	1	affpro	WordList	1	1	1	163	j	NULL	NULL	NULL	NULL	4	NULL	NULL	NULL	NULL	NULL	NULL	NULL	NULL	NULL	NULL	NULL	NULL	NULL	NULL	pra4	taskList2	动物转基因	NULL	NULL	NULL	NULL	NULL	NULL	NULL
大创sc-iat	2	1	<?xml version="1.0"?>\n<Clock xmlns:dt="urn:schemas-microsoft-com:datatypes"><Description dt:dt="string">E-Prime Primary Realtime Clock</Description><StartTime><Timestamp dt:dt="int">0</Timestamp><DateUtc dt:dt="string">2021-10-22T01:50:43Z</DateUtc></StartTime><FrequencyChanges><FrequencyChange><Frequency dt:dt="r8">10000000</Frequency><Timestamp dt:dt="r8">17665795465106</Timestamp><Current dt:…	59.96	1.0.0.17	1	596996450	2.0.10.182	10-22-2021	2021-10-22 01:50:44	09:50:44	2.0.10.92	1	affpro	WordList	1	1	1	164	f	NULL	NULL	NULL	NULL	NULL	NULL	NULL	NULL	NULL	NULL	NULL	NULL	3	NULL	NULL	NULL	NULL	NULL	NULL	pra4	taskList2	高科技的	NULL	NULL	NULL	NULL	NULL	NULL	NULL
大创sc-iat	2	1	<?xml version="1.0"?>\n<Clock xmlns:dt="urn:schemas-microsoft-com:datatypes"><Description dt:dt="string">E-Prime Primary Realtime Clock</Description><StartTime><Timestamp dt:dt="int">0</Timestamp><DateUtc dt:dt="string">2021-10-22T01:50:43Z</DateUtc></StartTime><FrequencyChanges><FrequencyChange><Frequency dt:dt="r8">10000000</Frequency><Timestamp dt:dt="r8">17665795465106</Timestamp><Current dt:…	59.96	1.0.0.17	1	596996450	2.0.10.182	10-22-2021	2021-10-22 01:50:44	09:50:44	2.0.10.92	1	affpro	WordList	1	1	1	165	j	NULL	NULL	NULL	NULL	NULL	NULL	NULL	NULL	4	NULL	NULL	NULL	NULL	NULL	NULL	NULL	NULL	NULL	NULL	pra4	taskList2	有争议的	NULL	NULL	NULL	NULL	NULL	NULL	NULL
大创sc-iat	2	1	<?xml version="1.0"?>\n<Clock xmlns:dt="urn:schemas-microsoft-com:datatypes"><Description dt:dt="string">E-Prime Primary Realtime Clock</Description><StartTime><Timestamp dt:dt="int">0</Timestamp><DateUtc dt:dt="string">2021-10-22T01:50:43Z</DateUtc></StartTime><FrequencyChanges><FrequencyChange><Frequency dt:dt="r8">10000000</Frequency><Timestamp dt:dt="r8">17665795465106</Timestamp><Current dt:…	59.96	1.0.0.17	1	596996450	2.0.10.182	10-22-2021	2021-10-22 01:50:44	09:50:44	2.0.10.92	1	affpro	WordList	1	1	1	166	f	NULL	NULL	NULL	NULL	NULL	NULL	NULL	NULL	NULL	NULL	NULL	NULL	1	NULL	NULL	NULL	NULL	NULL	NULL	pra4	taskList2	科学的	NULL	NULL	NULL	NULL	NULL	NULL	NULL
大创sc-iat	2	1	<?xml version="1.0"?>\n<Clock xmlns:dt="urn:schemas-microsoft-com:datatypes"><Description dt:dt="string">E-Prime Primary Realtime Clock</Description><StartTime><Timestamp dt:dt="int">0</Timestamp><DateUtc dt:dt="string">2021-10-22T01:50:43Z</DateUtc></StartTime><FrequencyChanges><FrequencyChange><Frequency dt:dt="r8">10000000</Frequency><Timestamp dt:dt="r8">17665795465106</Timestamp><Current dt:…	59.96	1.0.0.17	1	596996450	2.0.10.182	10-22-2021	2021-10-22 01:50:44	09:50:44	2.0.10.92	1	affpro	WordList	1	1	1	167	f	NULL	NULL	NULL	NULL	NULL	NULL	NULL	NULL	NULL	NULL	NULL	NULL	2	NULL	NULL	NULL	NULL	NULL	NULL	pra4	taskList2	高产的	NULL	NULL	NULL	NULL	NULL	NULL	NULL
大创sc-iat	2	1	<?xml version="1.0"?>\n<Clock xmlns:dt="urn:schemas-microsoft-com:datatypes"><Description dt:dt="string">E-Prime Primary Realtime Clock</Description><StartTime><Timestamp dt:dt="int">0</Timestamp><DateUtc dt:dt="string">2021-10-22T01:50:43Z</DateUtc></StartTime><FrequencyChanges><FrequencyChange><Frequency dt:dt="r8">10000000</Frequency><Timestamp dt:dt="r8">17665795465106</Timestamp><Current dt:…	59.96	1.0.0.17	1	596996450	2.0.10.182	10-22-2021	2021-10-22 01:50:44	09:50:44	2.0.10.92	1	affpro	WordList	1	1	1	168	j	NULL	NULL	NULL	NULL	2	NULL	NULL	NULL	NULL	NULL	NULL	NULL	NULL	NULL	NULL	NULL	NULL	NULL	NULL	pra4	taskList2	抗虫害棉花	NULL	NULL	NULL	NULL	NULL	NULL	NULL
大创sc-iat	2	1	<?xml version="1.0"?>\n<Clock xmlns:dt="urn:schemas-microsoft-com:datatypes"><Description dt:dt="string">E-Prime Primary Realtime Clock</Description><StartTime><Timestamp dt:dt="int">0</Timestamp><DateUtc dt:dt="string">2021-10-22T01:50:43Z</DateUtc></StartTime><FrequencyChanges><FrequencyChange><Frequency dt:dt="r8">10000000</Frequency><Timestamp dt:dt="r8">17665795465106</Timestamp><Current dt:…	59.96	1.0.0.17	1	596996450	2.0.10.182	10-22-2021	2021-10-22 01:50:44	09:50:44	2.0.10.92	1	affpro	WordList	1	1	1	169	f	NULL	NULL	NULL	NULL	NULL	NULL	NULL	NULL	NULL	NULL	NULL	NULL	4	NULL	NULL	NULL	NULL	NULL	NULL	pra4	taskList2	创新的	NULL	NULL	NULL	NULL	NULL	NULL	NULL
大创sc-iat	2	1	<?xml version="1.0"?>\n<Clock xmlns:dt="urn:schemas-microsoft-com:datatypes"><Description dt:dt="string">E-Prime Primary Realtime Clock</Description><StartTime><Timestamp dt:dt="int">0</Timestamp><DateUtc dt:dt="string">2021-10-22T01:50:43Z</DateUtc></StartTime><FrequencyChanges><FrequencyChange><Frequency dt:dt="r8">10000000</Frequency><Timestamp dt:dt="r8">17665795465106</Timestamp><Current dt:…	59.96	1.0.0.17	1	596996450	2.0.10.182	10-22-2021	2021-10-22 01:50:44	09:50:44	2.0.10.92	1	affpro	WordList	1	1	1	170	j	NULL	NULL	NULL	NULL	4	NULL	NULL	NULL	NULL	NULL	NULL	NULL	NULL	NULL	NULL	NULL	NULL	NULL	NULL	pra4	taskList2	动物转基因	NULL	NULL	NULL	NULL	NULL	NULL	NULL
大创sc-iat	2	1	<?xml version="1.0"?>\n<Clock xmlns:dt="urn:schemas-microsoft-com:datatypes"><Description dt:dt="string">E-Prime Primary Realtime Clock</Description><StartTime><Timestamp dt:dt="int">0</Timestamp><DateUtc dt:dt="string">2021-10-22T01:50:43Z</DateUtc></StartTime><FrequencyChanges><FrequencyChange><Frequency dt:dt="r8">10000000</Frequency><Timestamp dt:dt="r8">17665795465106</Timestamp><Current dt:…	59.96	1.0.0.17	1	596996450	2.0.10.182	10-22-2021	2021-10-22 01:50:44	09:50:44	2.0.10.92	1	affpro	WordList	1	1	1	171	f	NULL	NULL	NULL	NULL	NULL	NULL	NULL	NULL	NULL	NULL	NULL	NULL	3	NULL	NULL	NULL	NULL	NULL	NULL	pra4	taskList2	高科技的	NULL	NULL	NULL	NULL	NULL	NULL	NULL
大创sc-iat	2	1	<?xml version="1.0"?>\n<Clock xmlns:dt="urn:schemas-microsoft-com:datatypes"><Description dt:dt="string">E-Prime Primary Realtime Clock</Description><StartTime><Timestamp dt:dt="int">0</Timestamp><DateUtc dt:dt="string">2021-10-22T01:50:43Z</DateUtc></StartTime><FrequencyChanges><FrequencyChange><Frequency dt:dt="r8">10000000</Frequency><Timestamp dt:dt="r8">17665795465106</Timestamp><Current dt:…	59.96	1.0.0.17	1	596996450	2.0.10.182	10-22-2021	2021-10-22 01:50:44	09:50:44	2.0.10.92	1	affpro	WordList	1	1	1	172	j	NULL	NULL	NULL	NULL	NULL	NULL	NULL	NULL	1	NULL	NULL	NULL	NULL	NULL	NULL	NULL	NULL	NULL	NULL	pra4	taskList2	不成熟的	NULL	NULL	NULL	NULL	NULL	NULL	NULL
大创sc-iat	2	1	<?xml version="1.0"?>\n<Clock xmlns:dt="urn:schemas-microsoft-com:datatypes"><Description dt:dt="string">E-Prime Primary Realtime Clock</Description><StartTime><Timestamp dt:dt="int">0</Timestamp><DateUtc dt:dt="string">2021-10-22T01:50:43Z</DateUtc></StartTime><FrequencyChanges><FrequencyChange><Frequency dt:dt="r8">10000000</Frequency><Timestamp dt:dt="r8">17665795465106</Timestamp><Current dt:…	59.96	1.0.0.17	1	596996450	2.0.10.182	10-22-2021	2021-10-22 01:50:44	09:50:44	2.0.10.92	1	affpro	WordList	1	1	1	173	f	NULL	NULL	NULL	NULL	NULL	NULL	NULL	NULL	NULL	NULL	NULL	NULL	2	NULL	NULL	NULL	NULL	NULL	NULL	pra4	taskList2	高产的	NULL	NULL	NULL	NULL	NULL	NULL	NULL
大创sc-iat	2	1	<?xml version="1.0"?>\n<Clock xmlns:dt="urn:schemas-microsoft-com:datatypes"><Description dt:dt="string">E-Prime Primary Realtime Clock</Description><StartTime><Timestamp dt:dt="int">0</Timestamp><DateUtc dt:dt="string">2021-10-22T01:50:43Z</DateUtc></StartTime><FrequencyChanges><FrequencyChange><Frequency dt:dt="r8">10000000</Frequency><Timestamp dt:dt="r8">17665795465106</Timestamp><Current dt:…	59.96	1.0.0.17	1	596996450	2.0.10.182	10-22-2021	2021-10-22 01:50:44	09:50:44	2.0.10.92	1	affpro	WordList	1	1	1	174	j	NULL	NULL	NULL	NULL	NULL	NULL	NULL	NULL	3	NULL	NULL	NULL	NULL	NULL	NULL	NULL	NULL	NULL	NULL	pra4	taskList2	非天然的	NULL	NULL	NULL	NULL	NULL	NULL	NULL
大创sc-iat	2	1	<?xml version="1.0"?>\n<Clock xmlns:dt="urn:schemas-microsoft-com:datatypes"><Description dt:dt="string">E-Prime Primary Realtime Clock</Description><StartTime><Timestamp dt:dt="int">0</Timestamp><DateUtc dt:dt="string">2021-10-22T01:50:43Z</DateUtc></StartTime><FrequencyChanges><FrequencyChange><Frequency dt:dt="r8">10000000</Frequency><Timestamp dt:dt="r8">17665795465106</Timestamp><Current dt:…	59.96	1.0.0.17	1	596996450	2.0.10.182	10-22-2021	2021-10-22 01:50:44	09:50:44	2.0.10.92	1	affpro	WordList	1	1	1	175	f	NULL	NULL	NULL	NULL	NULL	NULL	NULL	NULL	NULL	NULL	NULL	NULL	1	NULL	NULL	NULL	NULL	NULL	NULL	pra4	taskList2	科学的	NULL	NULL	NULL	NULL	NULL	NULL	NULL
大创sc-iat	2	1	<?xml version="1.0"?>\n<Clock xmlns:dt="urn:schemas-microsoft-com:datatypes"><Description dt:dt="string">E-Prime Primary Realtime Clock</Description><StartTime><Timestamp dt:dt="int">0</Timestamp><DateUtc dt:dt="string">2021-10-22T01:50:43Z</DateUtc></StartTime><FrequencyChanges><FrequencyChange><Frequency dt:dt="r8">10000000</Frequency><Timestamp dt:dt="r8">17665795465106</Timestamp><Current dt:…	59.96	1.0.0.17	1	596996450	2.0.10.182	10-22-2021	2021-10-22 01:50:44	09:50:44	2.0.10.92	1	affpro	WordList	1	1	1	176	j	NULL	NULL	NULL	NULL	1	NULL	NULL	NULL	NULL	NULL	NULL	NULL	NULL	NULL	NULL	NULL	NULL	NULL	NULL	pra4	taskList2	转基因食物	NULL	NULL	NULL	NULL	NULL	NULL	NULL
大创sc-iat	2	1	<?xml version="1.0"?>\n<Clock xmlns:dt="urn:schemas-microsoft-com:datatypes"><Description dt:dt="string">E-Prime Primary Realtime Clock</Description><StartTime><Timestamp dt:dt="int">0</Timestamp><DateUtc dt:dt="string">2021-10-22T01:50:43Z</DateUtc></StartTime><FrequencyChanges><FrequencyChange><Frequency dt:dt="r8">10000000</Frequency><Timestamp dt:dt="r8">17665795465106</Timestamp><Current dt:…	59.96	1.0.0.17	1	596996450	2.0.10.182	10-22-2021	2021-10-22 01:50:44	09:50:44	2.0.10.92	1	affpro	WordList	1	1	1	177	j	NULL	NULL	NULL	NULL	NULL	NULL	NULL	NULL	2	NULL	NULL	NULL	NULL	NULL	NULL	NULL	NULL	NULL	NULL	pra4	taskList2	高风险的	NULL	NULL	NULL	NULL	NULL	NULL	NULL
大创sc-iat	2	1	<?xml version="1.0"?>\n<Clock xmlns:dt="urn:schemas-microsoft-com:datatypes"><Description dt:dt="string">E-Prime Primary Realtime Clock</Description><StartTime><Timestamp dt:dt="int">0</Timestamp><DateUtc dt:dt="string">2021-10-22T01:50:43Z</DateUtc></StartTime><FrequencyChanges><FrequencyChange><Frequency dt:dt="r8">10000000</Frequency><Timestamp dt:dt="r8">17665795465106</Timestamp><Current dt:…	59.96	1.0.0.17	1	596996450	2.0.10.182	10-22-2021	2021-10-22 01:50:44	09:50:44	2.0.10.92	1	affpro	WordList	1	1	1	178	f	NULL	NULL	NULL	NULL	NULL	NULL	NULL	NULL	NULL	NULL	NULL	NULL	4	NULL	NULL	NULL	NULL	NULL	NULL	pra4	taskList2	创新的	NULL	NULL	NULL	NULL	NULL	NULL	NULL
大创sc-iat	2	1	<?xml version="1.0"?>\n<Clock xmlns:dt="urn:schemas-microsoft-com:datatypes"><Description dt:dt="string">E-Prime Primary Realtime Clock</Description><StartTime><Timestamp dt:dt="int">0</Timestamp><DateUtc dt:dt="string">2021-10-22T01:50:43Z</DateUtc></StartTime><FrequencyChanges><FrequencyChange><Frequency dt:dt="r8">10000000</Frequency><Timestamp dt:dt="r8">17665795465106</Timestamp><Current dt:…	59.96	1.0.0.17	1	596996450	2.0.10.182	10-22-2021	2021-10-22 01:50:44	09:50:44	2.0.10.92	1	affpro	WordList	1	1	1	179	f	NULL	NULL	NULL	NULL	NULL	NULL	NULL	NULL	NULL	NULL	NULL	NULL	3	NULL	NULL	NULL	NULL	NULL	NULL	pra4	taskList2	高科技的	NULL	NULL	NULL	NULL	NULL	NULL	NULL
大创sc-iat	2	1	<?xml version="1.0"?>\n<Clock xmlns:dt="urn:schemas-microsoft-com:datatypes"><Description dt:dt="string">E-Prime Primary Realtime Clock</Description><StartTime><Timestamp dt:dt="int">0</Timestamp><DateUtc dt:dt="string">2021-10-22T01:50:43Z</DateUtc></StartTime><FrequencyChanges><FrequencyChange><Frequency dt:dt="r8">10000000</Frequency><Timestamp dt:dt="r8">17665795465106</Timestamp><Current dt:…	59.96	1.0.0.17	1	596996450	2.0.10.182	10-22-2021	2021-10-22 01:50:44	09:50:44	2.0.10.92	1	affpro	WordList	1	1	1	180	j	NULL	NULL	NULL	NULL	2	NULL	NULL	NULL	NULL	NULL	NULL	NULL	NULL	NULL	NULL	NULL	NULL	NULL	NULL	pra4	taskList2	抗虫害棉花	NULL	NULL	NULL	NULL	NULL	NULL	NULL
大创sc-iat	2	1	<?xml version="1.0"?>\n<Clock xmlns:dt="urn:schemas-microsoft-com:datatypes"><Description dt:dt="string">E-Prime Primary Realtime Clock</Description><StartTime><Timestamp dt:dt="int">0</Timestamp><DateUtc dt:dt="string">2021-10-22T01:50:43Z</DateUtc></StartTime><FrequencyChanges><FrequencyChange><Frequency dt:dt="r8">10000000</Frequency><Timestamp dt:dt="r8">17665795465106</Timestamp><Current dt:…	59.96	1.0.0.17	1	596996450	2.0.10.182	10-22-2021	2021-10-22 01:50:44	09:50:44	2.0.10.92	1	affpro	WordList	1	1	1	181	f	NULL	NULL	NULL	NULL	NULL	NULL	NULL	NULL	NULL	NULL	NULL	NULL	2	NULL	NULL	NULL	NULL	NULL	NULL	pra4	taskList2	高产的	NULL	NULL	NULL	NULL	NULL	NULL	NULL
大创sc-iat	2	1	<?xml version="1.0"?>\n<Clock xmlns:dt="urn:schemas-microsoft-com:datatypes"><Description dt:dt="string">E-Prime Primary Realtime Clock</Description><StartTime><Timestamp dt:dt="int">0</Timestamp><DateUtc dt:dt="string">2021-10-22T01:50:43Z</DateUtc></StartTime><FrequencyChanges><FrequencyChange><Frequency dt:dt="r8">10000000</Frequency><Timestamp dt:dt="r8">17665795465106</Timestamp><Current dt:…	59.96	1.0.0.17	1	596996450	2.0.10.182	10-22-2021	2021-10-22 01:50:44	09:50:44	2.0.10.92	1	affpro	WordList	1	1	1	182	j	NULL	NULL	NULL	NULL	3	NULL	NULL	NULL	NULL	NULL	NULL	NULL	NULL	NULL	NULL	NULL	NULL	NULL	NULL	pra4	taskList2	转基因大豆	NULL	NULL	NULL	NULL	NULL	NULL	NULL
大创sc-iat	2	1	<?xml version="1.0"?>\n<Clock xmlns:dt="urn:schemas-microsoft-com:datatypes"><Description dt:dt="string">E-Prime Primary Realtime Clock</Description><StartTime><Timestamp dt:dt="int">0</Timestamp><DateUtc dt:dt="string">2021-10-22T01:50:43Z</DateUtc></StartTime><FrequencyChanges><FrequencyChange><Frequency dt:dt="r8">10000000</Frequency><Timestamp dt:dt="r8">17665795465106</Timestamp><Current dt:…	59.96	1.0.0.17	1	596996450	2.0.10.182	10-22-2021	2021-10-22 01:50:44	09:50:44	2.0.10.92	1	affpro	WordList	1	1	1	183	f	NULL	NULL	NULL	NULL	NULL	NULL	NULL	NULL	NULL	NULL	NULL	NULL	1	NULL	NULL	NULL	NULL	NULL	NULL	pra4	taskList2	科学的	NULL	NULL	NULL	NULL	NULL	NULL	NULL
大创sc-iat	2	1	<?xml version="1.0"?>\n<Clock xmlns:dt="urn:schemas-microsoft-com:datatypes"><Description dt:dt="string">E-Prime Primary Realtime Clock</Description><StartTime><Timestamp dt:dt="int">0</Timestamp><DateUtc dt:dt="string">2021-10-22T01:50:43Z</DateUtc></StartTime><FrequencyChanges><FrequencyChange><Frequency dt:dt="r8">10000000</Frequency><Timestamp dt:dt="r8">17665795465106</Timestamp><Current dt:…	59.96	1.0.0.17	1	596996450	2.0.10.182	10-22-2021	2021-10-22 01:50:44	09:50:44	2.0.10.92	1	affpro	WordList	1	1	1	184	j	NULL	NULL	NULL	NULL	NULL	NULL	NULL	NULL	4	NULL	NULL	NULL	NULL	NULL	NULL	NULL	NULL	NULL	NULL	pra4	taskList2	有争议的	NULL	NULL	NULL	NULL	NULL	NULL	NULL
大创sc-iat	2	1	<?xml version="1.0"?>\n<Clock xmlns:dt="urn:schemas-microsoft-com:datatypes"><Description dt:dt="string">E-Prime Primary Realtime Clock</Description><StartTime><Timestamp dt:dt="int">0</Timestamp><DateUtc dt:dt="string">2021-10-22T01:50:43Z</DateUtc></StartTime><FrequencyChanges><FrequencyChange><Frequency dt:dt="r8">10000000</Frequency><Timestamp dt:dt="r8">17665795465106</Timestamp><Current dt:…	59.96	1.0.0.17	1	596996450	2.0.10.182	10-22-2021	2021-10-22 01:50:44	09:50:44	2.0.10.92	1	affpro	WordList	1	1	1	185	f	NULL	NULL	NULL	NULL	NULL	NULL	NULL	NULL	NULL	NULL	NULL	NULL	3	NULL	NULL	NULL	NULL	NULL	NULL	pra4	taskList2	高科技的	NULL	NULL	NULL	NULL	NULL	NULL	NULL
大创sc-iat	2	1	<?xml version="1.0"?>\n<Clock xmlns:dt="urn:schemas-microsoft-com:datatypes"><Description dt:dt="string">E-Prime Primary Realtime Clock</Description><StartTime><Timestamp dt:dt="int">0</Timestamp><DateUtc dt:dt="string">2021-10-22T01:50:43Z</DateUtc></StartTime><FrequencyChanges><FrequencyChange><Frequency dt:dt="r8">10000000</Frequency><Timestamp dt:dt="r8">17665795465106</Timestamp><Current dt:…	59.96	1.0.0.17	1	596996450	2.0.10.182	10-22-2021	2021-10-22 01:50:44	09:50:44	2.0.10.92	1	affpro	WordList	1	1	1	186	j	NULL	NULL	NULL	NULL	4	NULL	NULL	NULL	NULL	NULL	NULL	NULL	NULL	NULL	NULL	NULL	NULL	NULL	NULL	pra4	taskList2	动物转基因	NULL	NULL	NULL	NULL	NULL	NULL	NULL
大创sc-iat	2	1	<?xml version="1.0"?>\n<Clock xmlns:dt="urn:schemas-microsoft-com:datatypes"><Description dt:dt="string">E-Prime Primary Realtime Clock</Description><StartTime><Timestamp dt:dt="int">0</Timestamp><DateUtc dt:dt="string">2021-10-22T01:50:43Z</DateUtc></StartTime><FrequencyChanges><FrequencyChange><Frequency dt:dt="r8">10000000</Frequency><Timestamp dt:dt="r8">17665795465106</Timestamp><Current dt:…	59.96	1.0.0.17	1	596996450	2.0.10.182	10-22-2021	2021-10-22 01:50:44	09:50:44	2.0.10.92	1	affpro	WordList	1	1	1	187	f	NULL	NULL	NULL	NULL	NULL	NULL	NULL	NULL	NULL	NULL	NULL	NULL	2	NULL	NULL	NULL	NULL	NULL	NULL	pra4	taskList2	高产的	NULL	NULL	NULL	NULL	NULL	NULL	NULL
大创sc-iat	2	1	<?xml version="1.0"?>\n<Clock xmlns:dt="urn:schemas-microsoft-com:datatypes"><Description dt:dt="string">E-Prime Primary Realtime Clock</Description><StartTime><Timestamp dt:dt="int">0</Timestamp><DateUtc dt:dt="string">2021-10-22T01:50:43Z</DateUtc></StartTime><FrequencyChanges><FrequencyChange><Frequency dt:dt="r8">10000000</Frequency><Timestamp dt:dt="r8">17665795465106</Timestamp><Current dt:…	59.96	1.0.0.17	1	596996450	2.0.10.182	10-22-2021	2021-10-22 01:50:44	09:50:44	2.0.10.92	1	affpro	WordList	1	1	1	188	j	NULL	NULL	NULL	NULL	NULL	NULL	NULL	NULL	2	NULL	NULL	NULL	NULL	NULL	NULL	NULL	NULL	NULL	NULL	pra4	taskList2	高风险的	NULL	NULL	NULL	NULL	NULL	NULL	NULL
大创sc-iat	2	1	<?xml version="1.0"?>\n<Clock xmlns:dt="urn:schemas-microsoft-com:datatypes"><Description dt:dt="string">E-Prime Primary Realtime Clock</Description><StartTime><Timestamp dt:dt="int">0</Timestamp><DateUtc dt:dt="string">2021-10-22T01:50:43Z</DateUtc></StartTime><FrequencyChanges><FrequencyChange><Frequency dt:dt="r8">10000000</Frequency><Timestamp dt:dt="r8">17665795465106</Timestamp><Current dt:…	59.96	1.0.0.17	1	596996450	2.0.10.182	10-22-2021	2021-10-22 01:50:44	09:50:44	2.0.10.92	1	affpro	WordList	1	1	1	189	j	NULL	NULL	NULL	NULL	2	NULL	NULL	NULL	NULL	NULL	NULL	NULL	NULL	NULL	NULL	NULL	NULL	NULL	NULL	pra4	taskList2	抗虫害棉花	NULL	NULL	NULL	NULL	NULL	NULL	NULL
大创sc-iat	2	1	<?xml version="1.0"?>\n<Clock xmlns:dt="urn:schemas-microsoft-com:datatypes"><Description dt:dt="string">E-Prime Primary Realtime Clock</Description><StartTime><Timestamp dt:dt="int">0</Timestamp><DateUtc dt:dt="string">2021-10-22T01:50:43Z</DateUtc></StartTime><FrequencyChanges><FrequencyChange><Frequency dt:dt="r8">10000000</Frequency><Timestamp dt:dt="r8">17665795465106</Timestamp><Current dt:…	59.96	1.0.0.17	1	596996450	2.0.10.182	10-22-2021	2021-10-22 01:50:44	09:50:44	2.0.10.92	1	affpro	WordList	1	1	1	190	f	NULL	NULL	NULL	NULL	NULL	NULL	NULL	NULL	NULL	NULL	NULL	NULL	1	NULL	NULL	NULL	NULL	NULL	NULL	pra4	taskList2	科学的	NULL	NULL	NULL	NULL	NULL	NULL	NULL
大创sc-iat	2	1	<?xml version="1.0"?>\n<Clock xmlns:dt="urn:schemas-microsoft-com:datatypes"><Description dt:dt="string">E-Prime Primary Realtime Clock</Description><StartTime><Timestamp dt:dt="int">0</Timestamp><DateUtc dt:dt="string">2021-10-22T01:50:43Z</DateUtc></StartTime><FrequencyChanges><FrequencyChange><Frequency dt:dt="r8">10000000</Frequency><Timestamp dt:dt="r8">17665795465106</Timestamp><Current dt:…	59.96	1.0.0.17	1	596996450	2.0.10.182	10-22-2021	2021-10-22 01:50:44	09:50:44	2.0.10.92	1	affpro	WordList	1	1	1	191	f	NULL	NULL	NULL	NULL	NULL	NULL	NULL	NULL	NULL	NULL	NULL	NULL	4	NULL	NULL	NULL	NULL	NULL	NULL	pra4	taskList2	创新的	NULL	NULL	NULL	NULL	NULL	NULL	NULL
大创sc-iat	2	1	<?xml version="1.0"?>\n<Clock xmlns:dt="urn:schemas-microsoft-com:datatypes"><Description dt:dt="string">E-Prime Primary Realtime Clock</Description><StartTime><Timestamp dt:dt="int">0</Timestamp><DateUtc dt:dt="string">2021-10-22T01:50:43Z</DateUtc></StartTime><FrequencyChanges><FrequencyChange><Frequency dt:dt="r8">10000000</Frequency><Timestamp dt:dt="r8">17665795465106</Timestamp><Current dt:…	59.96	1.0.0.17	1	596996450	2.0.10.182	10-22-2021	2021-10-22 01:50:44	09:50:44	2.0.10.92	1	affpro	WordList	1	1	1	192	j	NULL	NULL	NULL	NULL	NULL	NULL	NULL	NULL	4	NULL	NULL	NULL	NULL	NULL	NULL	NULL	NULL	NULL	NULL	pra4	taskList2	有争议的	NULL	NULL	NULL	NULL	NULL	NULL	NULL
大创sc-iat	2	2	<?xml version="1.0"?>\n<Clock xmlns:dt="urn:schemas-microsoft-com:datatypes"><Description dt:dt="string">E-Prime Primary Realtime Clock</Description><StartTime><Timestamp dt:dt="int">0</Timestamp><DateUtc dt:dt="string">2021-10-22T02:00:14Z</DateUtc></StartTime><FrequencyChanges><FrequencyChange><Frequency dt:dt="r8">10000000</Frequency><Timestamp dt:dt="r8">17671510370172</Timestamp><Current dt:…	59.965	1.0.0.21	1	2016978559	2.0.10.182	10-22-2021	2021-10-22 02:00:16	10:00:16	2.0.10.92	1	affpro	WordList	1	1	1	1	f	NULL	NULL	NULL	NULL	NULL	NULL	NULL	NULL	NULL	4	NULL	NULL	NULL	2	1	1	NULL	NULL	NULL	pra1	practiceList1	创新的	1	f	-999999	-2	52789	0	f
大创sc-iat	2	2	<?xml version="1.0"?>\n<Clock xmlns:dt="urn:schemas-microsoft-com:datatypes"><Description dt:dt="string">E-Prime Primary Realtime Clock</Description><StartTime><Timestamp dt:dt="int">0</Timestamp><DateUtc dt:dt="string">2021-10-22T02:00:14Z</DateUtc></StartTime><FrequencyChanges><FrequencyChange><Frequency dt:dt="r8">10000000</Frequency><Timestamp dt:dt="r8">17671510370172</Timestamp><Current dt:…	59.965	1.0.0.21	1	2016978559	2.0.10.182	10-22-2021	2021-10-22 02:00:16	10:00:16	2.0.10.92	1	affpro	WordList	1	1	1	2	j	NULL	NULL	NULL	NULL	NULL	4	NULL	NULL	NULL	NULL	NULL	NULL	NULL	3	1	2	NULL	NULL	NULL	pra1	practiceList1	有争议的	1	j	-999999	1	54687	0	j
大创sc-iat	2	2	<?xml version="1.0"?>\n<Clock xmlns:dt="urn:schemas-microsoft-com:datatypes"><Description dt:dt="string">E-Prime Primary Realtime Clock</Description><StartTime><Timestamp dt:dt="int">0</Timestamp><DateUtc dt:dt="string">2021-10-22T02:00:14Z</DateUtc></StartTime><FrequencyChanges><FrequencyChange><Frequency dt:dt="r8">10000000</Frequency><Timestamp dt:dt="r8">17671510370172</Timestamp><Current dt:…	59.965	1.0.0.21	1	2016978559	2.0.10.182	10-22-2021	2021-10-22 02:00:16	10:00:16	2.0.10.92	1	affpro	WordList	1	1	1	3	j	NULL	NULL	NULL	NULL	NULL	2	NULL	NULL	NULL	NULL	NULL	NULL	NULL	3	1	3	NULL	NULL	NULL	pra1	practiceList1	高风险的	0	j	-999999	-1	56251	0	f
大创sc-iat	2	2	<?xml version="1.0"?>\n<Clock xmlns:dt="urn:schemas-microsoft-com:datatypes"><Description dt:dt="string">E-Prime Primary Realtime Clock</Description><StartTime><Timestamp dt:dt="int">0</Timestamp><DateUtc dt:dt="string">2021-10-22T02:00:14Z</DateUtc></StartTime><FrequencyChanges><FrequencyChange><Frequency dt:dt="r8">10000000</Frequency><Timestamp dt:dt="r8">17671510370172</Timestamp><Current dt:…	59.965	1.0.0.21	1	2016978559	2.0.10.182	10-22-2021	2021-10-22 02:00:16	10:00:16	2.0.10.92	1	affpro	WordList	1	1	1	4	f	NULL	3	NULL	NULL	NULL	NULL	NULL	NULL	NULL	NULL	NULL	NULL	NULL	1	1	4	NULL	NULL	NULL	pra1	practiceList1	转基因大豆	1	f	-999999	-2	57830	0	f
大创sc-iat	2	2	<?xml version="1.0"?>\n<Clock xmlns:dt="urn:schemas-microsoft-com:datatypes"><Description dt:dt="string">E-Prime Primary Realtime Clock</Description><StartTime><Timestamp dt:dt="int">0</Timestamp><DateUtc dt:dt="string">2021-10-22T02:00:14Z</DateUtc></StartTime><FrequencyChanges><FrequencyChange><Frequency dt:dt="r8">10000000</Frequency><Timestamp dt:dt="r8">17671510370172</Timestamp><Current dt:…	59.965	1.0.0.21	1	2016978559	2.0.10.182	10-22-2021	2021-10-22 02:00:16	10:00:16	2.0.10.92	1	affpro	WordList	1	1	1	5	f	NULL	NULL	NULL	NULL	NULL	NULL	NULL	NULL	NULL	2	NULL	NULL	NULL	2	2	5	NULL	NULL	NULL	pra1	practiceList1	高产的	0	f	-999999	0	59544	0	j
大创sc-iat	2	2	<?xml version="1.0"?>\n<Clock xmlns:dt="urn:schemas-microsoft-com:datatypes"><Description dt:dt="string">E-Prime Primary Realtime Clock</Description><StartTime><Timestamp dt:dt="int">0</Timestamp><DateUtc dt:dt="string">2021-10-22T02:00:14Z</DateUtc></StartTime><FrequencyChanges><FrequencyChange><Frequency dt:dt="r8">10000000</Frequency><Timestamp dt:dt="r8">17671510370172</Timestamp><Current dt:…	59.965	1.0.0.21	1	2016978559	2.0.10.182	10-22-2021	2021-10-22 02:00:16	10:00:16	2.0.10.92	1	affpro	WordList	1	1	1	6	f	NULL	2	NULL	NULL	NULL	NULL	NULL	NULL	NULL	NULL	NULL	NULL	NULL	1	2	6	NULL	NULL	NULL	pra1	practiceList1	抗虫害棉花	1	f	-999999	0	61242	0	f
大创sc-iat	2	2	<?xml version="1.0"?>\n<Clock xmlns:dt="urn:schemas-microsoft-com:datatypes"><Description dt:dt="string">E-Prime Primary Realtime Clock</Description><StartTime><Timestamp dt:dt="int">0</Timestamp><DateUtc dt:dt="string">2021-10-22T02:00:14Z</DateUtc></StartTime><FrequencyChanges><FrequencyChange><Frequency dt:dt="r8">10000000</Frequency><Timestamp dt:dt="r8">17671510370172</Timestamp><Current dt:…	59.965	1.0.0.21	1	2016978559	2.0.10.182	10-22-2021	2021-10-22 02:00:16	10:00:16	2.0.10.92	1	affpro	WordList	1	1	1	7	j	NULL	NULL	NULL	NULL	NULL	1	NULL	NULL	NULL	NULL	NULL	NULL	NULL	3	2	7	NULL	NULL	NULL	pra1	practiceList1	不成熟的	1	j	-999999	-1	63089	0	j
大创sc-iat	2	2	<?xml version="1.0"?>\n<Clock xmlns:dt="urn:schemas-microsoft-com:datatypes"><Description dt:dt="string">E-Prime Primary Realtime Clock</Description><StartTime><Timestamp dt:dt="int">0</Timestamp><DateUtc dt:dt="string">2021-10-22T02:00:14Z</DateUtc></StartTime><FrequencyChanges><FrequencyChange><Frequency dt:dt="r8">10000000</Frequency><Timestamp dt:dt="r8">17671510370172</Timestamp><Current dt:…	59.965	1.0.0.21	1	2016978559	2.0.10.182	10-22-2021	2021-10-22 02:00:16	10:00:16	2.0.10.92	1	affpro	WordList	1	1	1	8	j	NULL	NULL	NULL	NULL	NULL	3	NULL	NULL	NULL	NULL	NULL	NULL	NULL	3	2	8	NULL	NULL	NULL	pra1	practiceList1	非天然的	1	j	-999999	-2	64651	0	j
大创sc-iat	2	2	<?xml version="1.0"?>\n<Clock xmlns:dt="urn:schemas-microsoft-com:datatypes"><Description dt:dt="string">E-Prime Primary Realtime Clock</Description><StartTime><Timestamp dt:dt="int">0</Timestamp><DateUtc dt:dt="string">2021-10-22T02:00:14Z</DateUtc></StartTime><FrequencyChanges><FrequencyChange><Frequency dt:dt="r8">10000000</Frequency><Timestamp dt:dt="r8">17671510370172</Timestamp><Current dt:…	59.965	1.0.0.21	1	2016978559	2.0.10.182	10-22-2021	2021-10-22 02:00:16	10:00:16	2.0.10.92	1	affpro	WordList	1	1	1	9	f	NULL	1	NULL	NULL	NULL	NULL	NULL	NULL	NULL	NULL	NULL	NULL	NULL	1	3	9	NULL	NULL	NULL	pra1	practiceList1	转基因食物	1	f	-999999	-2	66565	0	f
大创sc-iat	2	2	<?xml version="1.0"?>\n<Clock xmlns:dt="urn:schemas-microsoft-com:datatypes"><Description dt:dt="string">E-Prime Primary Realtime Clock</Description><StartTime><Timestamp dt:dt="int">0</Timestamp><DateUtc dt:dt="string">2021-10-22T02:00:14Z</DateUtc></StartTime><FrequencyChanges><FrequencyChange><Frequency dt:dt="r8">10000000</Frequency><Timestamp dt:dt="r8">17671510370172</Timestamp><Current dt:…	59.965	1.0.0.21	1	2016978559	2.0.10.182	10-22-2021	2021-10-22 02:00:16	10:00:16	2.0.10.92	1	affpro	WordList	1	1	1	10	f	NULL	NULL	NULL	NULL	NULL	NULL	NULL	NULL	NULL	3	NULL	NULL	NULL	2	3	10	NULL	NULL	NULL	pra1	practiceList1	高科技的	1	f	-999999	-2	68061	0	f
大创sc-iat	2	2	<?xml version="1.0"?>\n<Clock xmlns:dt="urn:schemas-microsoft-com:datatypes"><Description dt:dt="string">E-Prime Primary Realtime Clock</Description><StartTime><Timestamp dt:dt="int">0</Timestamp><DateUtc dt:dt="string">2021-10-22T02:00:14Z</DateUtc></StartTime><FrequencyChanges><FrequencyChange><Frequency dt:dt="r8">10000000</Frequency><Timestamp dt:dt="r8">17671510370172</Timestamp><Current dt:…	59.965	1.0.0.21	1	2016978559	2.0.10.182	10-22-2021	2021-10-22 02:00:16	10:00:16	2.0.10.92	1	affpro	WordList	1	1	1	11	j	NULL	NULL	NULL	NULL	NULL	1	NULL	NULL	NULL	NULL	NULL	NULL	NULL	3	3	11	NULL	NULL	NULL	pra1	practiceList1	不成熟的	1	j	-999999	-1	70127	0	j
大创sc-iat	2	2	<?xml version="1.0"?>\n<Clock xmlns:dt="urn:schemas-microsoft-com:datatypes"><Description dt:dt="string">E-Prime Primary Realtime Clock</Description><StartTime><Timestamp dt:dt="int">0</Timestamp><DateUtc dt:dt="string">2021-10-22T02:00:14Z</DateUtc></StartTime><FrequencyChanges><FrequencyChange><Frequency dt:dt="r8">10000000</Frequency><Timestamp dt:dt="r8">17671510370172</Timestamp><Current dt:…	59.965	1.0.0.21	1	2016978559	2.0.10.182	10-22-2021	2021-10-22 02:00:16	10:00:16	2.0.10.92	1	affpro	WordList	1	1	1	12	j	NULL	NULL	NULL	NULL	NULL	3	NULL	NULL	NULL	NULL	NULL	NULL	NULL	3	3	12	NULL	NULL	NULL	pra1	practiceList1	非天然的	1	j	-999999	-1	71573	0	j
大创sc-iat	2	2	<?xml version="1.0"?>\n<Clock xmlns:dt="urn:schemas-microsoft-com:datatypes"><Description dt:dt="string">E-Prime Primary Realtime Clock</Description><StartTime><Timestamp dt:dt="int">0</Timestamp><DateUtc dt:dt="string">2021-10-22T02:00:14Z</DateUtc></StartTime><FrequencyChanges><FrequencyChange><Frequency dt:dt="r8">10000000</Frequency><Timestamp dt:dt="r8">17671510370172</Timestamp><Current dt:…	59.965	1.0.0.21	1	2016978559	2.0.10.182	10-22-2021	2021-10-22 02:00:16	10:00:16	2.0.10.92	1	affpro	WordList	1	1	1	13	f	NULL	4	NULL	NULL	NULL	NULL	NULL	NULL	NULL	NULL	NULL	NULL	NULL	1	4	13	NULL	NULL	NULL	pra1	practiceList1	动物转基因	1	f	-999999	-1	73620	0	f
大创sc-iat	2	2	<?xml version="1.0"?>\n<Clock xmlns:dt="urn:schemas-microsoft-com:datatypes"><Description dt:dt="string">E-Prime Primary Realtime Clock</Description><StartTime><Timestamp dt:dt="int">0</Timestamp><DateUtc dt:dt="string">2021-10-22T02:00:14Z</DateUtc></StartTime><FrequencyChanges><FrequencyChange><Frequency dt:dt="r8">10000000</Frequency><Timestamp dt:dt="r8">17671510370172</Timestamp><Current dt:…	59.965	1.0.0.21	1	2016978559	2.0.10.182	10-22-2021	2021-10-22 02:00:16	10:00:16	2.0.10.92	1	affpro	WordList	1	1	1	14	j	NULL	NULL	NULL	NULL	NULL	4	NULL	NULL	NULL	NULL	NULL	NULL	NULL	3	4	14	NULL	NULL	NULL	pra1	practiceList1	有争议的	1	j	-999999	-1	74999	0	j
大创sc-iat	2	2	<?xml version="1.0"?>\n<Clock xmlns:dt="urn:schemas-microsoft-com:datatypes"><Description dt:dt="string">E-Prime Primary Realtime Clock</Description><StartTime><Timestamp dt:dt="int">0</Timestamp><DateUtc dt:dt="string">2021-10-22T02:00:14Z</DateUtc></StartTime><FrequencyChanges><FrequencyChange><Frequency dt:dt="r8">10000000</Frequency><Timestamp dt:dt="r8">17671510370172</Timestamp><Current dt:…	59.965	1.0.0.21	1	2016978559	2.0.10.182	10-22-2021	2021-10-22 02:00:16	10:00:16	2.0.10.92	1	affpro	WordList	1	1	1	15	f	NULL	NULL	NULL	NULL	NULL	NULL	NULL	NULL	NULL	1	NULL	NULL	NULL	2	4	15	NULL	NULL	NULL	pra1	practiceList1	科学的	1	f	-999999	-1	76463	0	f
大创sc-iat	2	2	<?xml version="1.0"?>\n<Clock xmlns:dt="urn:schemas-microsoft-com:datatypes"><Description dt:dt="string">E-Prime Primary Realtime Clock</Description><StartTime><Timestamp dt:dt="int">0</Timestamp><DateUtc dt:dt="string">2021-10-22T02:00:14Z</DateUtc></StartTime><FrequencyChanges><FrequencyChange><Frequency dt:dt="r8">10000000</Frequency><Timestamp dt:dt="r8">17671510370172</Timestamp><Current dt:…	59.965	1.0.0.21	1	2016978559	2.0.10.182	10-22-2021	2021-10-22 02:00:16	10:00:16	2.0.10.92	1	affpro	WordList	1	1	1	16	j	NULL	NULL	NULL	NULL	NULL	2	NULL	NULL	NULL	NULL	NULL	NULL	NULL	3	4	16	NULL	NULL	NULL	pra1	practiceList1	高风险的	0	j	-999999	-1	77962	0	f
大创sc-iat	2	2	<?xml version="1.0"?>\n<Clock xmlns:dt="urn:schemas-microsoft-com:datatypes"><Description dt:dt="string">E-Prime Primary Realtime Clock</Description><StartTime><Timestamp dt:dt="int">0</Timestamp><DateUtc dt:dt="string">2021-10-22T02:00:14Z</DateUtc></StartTime><FrequencyChanges><FrequencyChange><Frequency dt:dt="r8">10000000</Frequency><Timestamp dt:dt="r8">17671510370172</Timestamp><Current dt:…	59.965	1.0.0.21	1	2016978559	2.0.10.182	10-22-2021	2021-10-22 02:00:16	10:00:16	2.0.10.92	1	affpro	WordList	1	1	1	17	f	NULL	NULL	NULL	NULL	NULL	NULL	NULL	NULL	NULL	3	NULL	NULL	NULL	2	5	17	NULL	NULL	NULL	pra1	practiceList1	高科技的	1	f	-999999	-1	79509	0	f
大创sc-iat	2	2	<?xml version="1.0"?>\n<Clock xmlns:dt="urn:schemas-microsoft-com:datatypes"><Description dt:dt="string">E-Prime Primary Realtime Clock</Description><StartTime><Timestamp dt:dt="int">0</Timestamp><DateUtc dt:dt="string">2021-10-22T02:00:14Z</DateUtc></StartTime><FrequencyChanges><FrequencyChange><Frequency dt:dt="r8">10000000</Frequency><Timestamp dt:dt="r8">17671510370172</Timestamp><Current dt:…	59.965	1.0.0.21	1	2016978559	2.0.10.182	10-22-2021	2021-10-22 02:00:16	10:00:16	2.0.10.92	1	affpro	WordList	1	1	1	18	j	NULL	NULL	NULL	NULL	NULL	4	NULL	NULL	NULL	NULL	NULL	NULL	NULL	3	5	18	NULL	NULL	NULL	pra1	practiceList1	有争议的	1	j	-999999	-1	81129	0	j
大创sc-iat	2	2	<?xml version="1.0"?>\n<Clock xmlns:dt="urn:schemas-microsoft-com:datatypes"><Description dt:dt="string">E-Prime Primary Realtime Clock</Description><StartTime><Timestamp dt:dt="int">0</Timestamp><DateUtc dt:dt="string">2021-10-22T02:00:14Z</DateUtc></StartTime><FrequencyChanges><FrequencyChange><Frequency dt:dt="r8">10000000</Frequency><Timestamp dt:dt="r8">17671510370172</Timestamp><Current dt:…	59.965	1.0.0.21	1	2016978559	2.0.10.182	10-22-2021	2021-10-22 02:00:16	10:00:16	2.0.10.92	1	affpro	WordList	1	1	1	19	j	NULL	NULL	NULL	NULL	NULL	2	NULL	NULL	NULL	NULL	NULL	NULL	NULL	3	5	19	NULL	NULL	NULL	pra1	practiceList1	高风险的	1	j	-999999	-1	82762	0	j
大创sc-iat	2	2	<?xml version="1.0"?>\n<Clock xmlns:dt="urn:schemas-microsoft-com:datatypes"><Description dt:dt="string">E-Prime Primary Realtime Clock</Description><StartTime><Timestamp dt:dt="int">0</Timestamp><DateUtc dt:dt="string">2021-10-22T02:00:14Z</DateUtc></StartTime><FrequencyChanges><FrequencyChange><Frequency dt:dt="r8">10000000</Frequency><Timestamp dt:dt="r8">17671510370172</Timestamp><Current dt:…	59.965	1.0.0.21	1	2016978559	2.0.10.182	10-22-2021	2021-10-22 02:00:16	10:00:16	2.0.10.92	1	affpro	WordList	1	1	1	20	f	NULL	2	NULL	NULL	NULL	NULL	NULL	NULL	NULL	NULL	NULL	NULL	NULL	1	5	20	NULL	NULL	NULL	pra1	practiceList1	抗虫害棉花	1	f	-999999	0	84776	0	f
大创sc-iat	2	2	<?xml version="1.0"?>\n<Clock xmlns:dt="urn:schemas-microsoft-com:datatypes"><Description dt:dt="string">E-Prime Primary Realtime Clock</Description><StartTime><Timestamp dt:dt="int">0</Timestamp><DateUtc dt:dt="string">2021-10-22T02:00:14Z</DateUtc></StartTime><FrequencyChanges><FrequencyChange><Frequency dt:dt="r8">10000000</Frequency><Timestamp dt:dt="r8">17671510370172</Timestamp><Current dt:…	59.965	1.0.0.21	1	2016978559	2.0.10.182	10-22-2021	2021-10-22 02:00:16	10:00:16	2.0.10.92	1	affpro	WordList	1	1	1	21	j	NULL	NULL	NULL	NULL	NULL	1	NULL	NULL	NULL	NULL	NULL	NULL	NULL	3	6	21	NULL	NULL	NULL	pra1	practiceList1	不成熟的	1	j	-999999	-1	86259	0	j
大创sc-iat	2	2	<?xml version="1.0"?>\n<Clock xmlns:dt="urn:schemas-microsoft-com:datatypes"><Description dt:dt="string">E-Prime Primary Realtime Clock</Description><StartTime><Timestamp dt:dt="int">0</Timestamp><DateUtc dt:dt="string">2021-10-22T02:00:14Z</DateUtc></StartTime><FrequencyChanges><FrequencyChange><Frequency dt:dt="r8">10000000</Frequency><Timestamp dt:dt="r8">17671510370172</Timestamp><Current dt:…	59.965	1.0.0.21	1	2016978559	2.0.10.182	10-22-2021	2021-10-22 02:00:16	10:00:16	2.0.10.92	1	affpro	WordList	1	1	1	22	f	NULL	3	NULL	NULL	NULL	NULL	NULL	NULL	NULL	NULL	NULL	NULL	NULL	1	6	22	NULL	NULL	NULL	pra1	practiceList1	转基因大豆	1	f	-999999	-1	87822	0	f
大创sc-iat	2	2	<?xml version="1.0"?>\n<Clock xmlns:dt="urn:schemas-microsoft-com:datatypes"><Description dt:dt="string">E-Prime Primary Realtime Clock</Description><StartTime><Timestamp dt:dt="int">0</Timestamp><DateUtc dt:dt="string">2021-10-22T02:00:14Z</DateUtc></StartTime><FrequencyChanges><FrequencyChange><Frequency dt:dt="r8">10000000</Frequency><Timestamp dt:dt="r8">17671510370172</Timestamp><Current dt:…	59.965	1.0.0.21	1	2016978559	2.0.10.182	10-22-2021	2021-10-22 02:00:16	10:00:16	2.0.10.92	1	affpro	WordList	1	1	1	23	f	NULL	NULL	NULL	NULL	NULL	NULL	NULL	NULL	NULL	1	NULL	NULL	NULL	2	6	23	NULL	NULL	NULL	pra1	practiceList1	科学的	1	f	-999999	-1	89387	0	f
大创sc-iat	2	2	<?xml version="1.0"?>\n<Clock xmlns:dt="urn:schemas-microsoft-com:datatypes"><Description dt:dt="string">E-Prime Primary Realtime Clock</Description><StartTime><Timestamp dt:dt="int">0</Timestamp><DateUtc dt:dt="string">2021-10-22T02:00:14Z</DateUtc></StartTime><FrequencyChanges><FrequencyChange><Frequency dt:dt="r8">10000000</Frequency><Timestamp dt:dt="r8">17671510370172</Timestamp><Current dt:…	59.965	1.0.0.21	1	2016978559	2.0.10.182	10-22-2021	2021-10-22 02:00:16	10:00:16	2.0.10.92	1	affpro	WordList	1	1	1	24	j	NULL	NULL	NULL	NULL	NULL	3	NULL	NULL	NULL	NULL	NULL	NULL	NULL	3	6	24	NULL	NULL	NULL	pra1	practiceList1	非天然的	1	j	-999999	-1	91183	0	j
大创sc-iat	2	2	<?xml version="1.0"?>\n<Clock xmlns:dt="urn:schemas-microsoft-com:datatypes"><Description dt:dt="string">E-Prime Primary Realtime Clock</Description><StartTime><Timestamp dt:dt="int">0</Timestamp><DateUtc dt:dt="string">2021-10-22T02:00:14Z</DateUtc></StartTime><FrequencyChanges><FrequencyChange><Frequency dt:dt="r8">10000000</Frequency><Timestamp dt:dt="r8">17671510370172</Timestamp><Current dt:…	59.965	1.0.0.21	1	2016978559	2.0.10.182	10-22-2021	2021-10-22 02:00:16	10:00:16	2.0.10.92	1	affpro	WordList	1	1	1	25	f	NULL	NULL	4	NULL	NULL	NULL	NULL	NULL	NULL	NULL	NULL	NULL	NULL	NULL	NULL	NULL	NULL	NULL	NULL	pra2	taskList1	动物转基因	NULL	NULL	NULL	NULL	NULL	NULL	NULL
大创sc-iat	2	2	<?xml version="1.0"?>\n<Clock xmlns:dt="urn:schemas-microsoft-com:datatypes"><Description dt:dt="string">E-Prime Primary Realtime Clock</Description><StartTime><Timestamp dt:dt="int">0</Timestamp><DateUtc dt:dt="string">2021-10-22T02:00:14Z</DateUtc></StartTime><FrequencyChanges><FrequencyChange><Frequency dt:dt="r8">10000000</Frequency><Timestamp dt:dt="r8">17671510370172</Timestamp><Current dt:…	59.965	1.0.0.21	1	2016978559	2.0.10.182	10-22-2021	2021-10-22 02:00:16	10:00:16	2.0.10.92	1	affpro	WordList	1	1	1	26	j	NULL	NULL	NULL	NULL	NULL	NULL	4	NULL	NULL	NULL	NULL	NULL	NULL	NULL	NULL	NULL	NULL	NULL	NULL	pra2	taskList1	有争议的	NULL	NULL	NULL	NULL	NULL	NULL	NULL
大创sc-iat	2	2	<?xml version="1.0"?>\n<Clock xmlns:dt="urn:schemas-microsoft-com:datatypes"><Description dt:dt="string">E-Prime Primary Realtime Clock</Description><StartTime><Timestamp dt:dt="int">0</Timestamp><DateUtc dt:dt="string">2021-10-22T02:00:14Z</DateUtc></StartTime><FrequencyChanges><FrequencyChange><Frequency dt:dt="r8">10000000</Frequency><Timestamp dt:dt="r8">17671510370172</Timestamp><Current dt:…	59.965	1.0.0.21	1	2016978559	2.0.10.182	10-22-2021	2021-10-22 02:00:16	10:00:16	2.0.10.92	1	affpro	WordList	1	1	1	27	f	NULL	NULL	NULL	NULL	NULL	NULL	NULL	NULL	NULL	NULL	3	NULL	NULL	NULL	NULL	NULL	NULL	NULL	NULL	pra2	taskList1	高科技的	NULL	NULL	NULL	NULL	NULL	NULL	NULL
大创sc-iat	2	2	<?xml version="1.0"?>\n<Clock xmlns:dt="urn:schemas-microsoft-com:datatypes"><Description dt:dt="string">E-Prime Primary Realtime Clock</Description><StartTime><Timestamp dt:dt="int">0</Timestamp><DateUtc dt:dt="string">2021-10-22T02:00:14Z</DateUtc></StartTime><FrequencyChanges><FrequencyChange><Frequency dt:dt="r8">10000000</Frequency><Timestamp dt:dt="r8">17671510370172</Timestamp><Current dt:…	59.965	1.0.0.21	1	2016978559	2.0.10.182	10-22-2021	2021-10-22 02:00:16	10:00:16	2.0.10.92	1	affpro	WordList	1	1	1	28	j	NULL	NULL	NULL	NULL	NULL	NULL	2	NULL	NULL	NULL	NULL	NULL	NULL	NULL	NULL	NULL	NULL	NULL	NULL	pra2	taskList1	高风险的	NULL	NULL	NULL	NULL	NULL	NULL	NULL
大创sc-iat	2	2	<?xml version="1.0"?>\n<Clock xmlns:dt="urn:schemas-microsoft-com:datatypes"><Description dt:dt="string">E-Prime Primary Realtime Clock</Description><StartTime><Timestamp dt:dt="int">0</Timestamp><DateUtc dt:dt="string">2021-10-22T02:00:14Z</DateUtc></StartTime><FrequencyChanges><FrequencyChange><Frequency dt:dt="r8">10000000</Frequency><Timestamp dt:dt="r8">17671510370172</Timestamp><Current dt:…	59.965	1.0.0.21	1	2016978559	2.0.10.182	10-22-2021	2021-10-22 02:00:16	10:00:16	2.0.10.92	1	affpro	WordList	1	1	1	29	f	NULL	NULL	NULL	NULL	NULL	NULL	NULL	NULL	NULL	NULL	2	NULL	NULL	NULL	NULL	NULL	NULL	NULL	NULL	pra2	taskList1	高产的	NULL	NULL	NULL	NULL	NULL	NULL	NULL
大创sc-iat	2	2	<?xml version="1.0"?>\n<Clock xmlns:dt="urn:schemas-microsoft-com:datatypes"><Description dt:dt="string">E-Prime Primary Realtime Clock</Description><StartTime><Timestamp dt:dt="int">0</Timestamp><DateUtc dt:dt="string">2021-10-22T02:00:14Z</DateUtc></StartTime><FrequencyChanges><FrequencyChange><Frequency dt:dt="r8">10000000</Frequency><Timestamp dt:dt="r8">17671510370172</Timestamp><Current dt:…	59.965	1.0.0.21	1	2016978559	2.0.10.182	10-22-2021	2021-10-22 02:00:16	10:00:16	2.0.10.92	1	affpro	WordList	1	1	1	30	j	NULL	NULL	NULL	NULL	NULL	NULL	1	NULL	NULL	NULL	NULL	NULL	NULL	NULL	NULL	NULL	NULL	NULL	NULL	pra2	taskList1	不成熟的	NULL	NULL	NULL	NULL	NULL	NULL	NULL
大创sc-iat	2	2	<?xml version="1.0"?>\n<Clock xmlns:dt="urn:schemas-microsoft-com:datatypes"><Description dt:dt="string">E-Prime Primary Realtime Clock</Description><StartTime><Timestamp dt:dt="int">0</Timestamp><DateUtc dt:dt="string">2021-10-22T02:00:14Z</DateUtc></StartTime><FrequencyChanges><FrequencyChange><Frequency dt:dt="r8">10000000</Frequency><Timestamp dt:dt="r8">17671510370172</Timestamp><Current dt:…	59.965	1.0.0.21	1	2016978559	2.0.10.182	10-22-2021	2021-10-22 02:00:16	10:00:16	2.0.10.92	1	affpro	WordList	1	1	1	31	f	NULL	NULL	1	NULL	NULL	NULL	NULL	NULL	NULL	NULL	NULL	NULL	NULL	NULL	NULL	NULL	NULL	NULL	NULL	pra2	taskList1	转基因食物	NULL	NULL	NULL	NULL	NULL	NULL	NULL
大创sc-iat	2	2	<?xml version="1.0"?>\n<Clock xmlns:dt="urn:schemas-microsoft-com:datatypes"><Description dt:dt="string">E-Prime Primary Realtime Clock</Description><StartTime><Timestamp dt:dt="int">0</Timestamp><DateUtc dt:dt="string">2021-10-22T02:00:14Z</DateUtc></StartTime><FrequencyChanges><FrequencyChange><Frequency dt:dt="r8">10000000</Frequency><Timestamp dt:dt="r8">17671510370172</Timestamp><Current dt:…	59.965	1.0.0.21	1	2016978559	2.0.10.182	10-22-2021	2021-10-22 02:00:16	10:00:16	2.0.10.92	1	affpro	WordList	1	1	1	32	j	NULL	NULL	NULL	NULL	NULL	NULL	3	NULL	NULL	NULL	NULL	NULL	NULL	NULL	NULL	NULL	NULL	NULL	NULL	pra2	taskList1	非天然的	NULL	NULL	NULL	NULL	NULL	NULL	NULL
大创sc-iat	2	2	<?xml version="1.0"?>\n<Clock xmlns:dt="urn:schemas-microsoft-com:datatypes"><Description dt:dt="string">E-Prime Primary Realtime Clock</Description><StartTime><Timestamp dt:dt="int">0</Timestamp><DateUtc dt:dt="string">2021-10-22T02:00:14Z</DateUtc></StartTime><FrequencyChanges><FrequencyChange><Frequency dt:dt="r8">10000000</Frequency><Timestamp dt:dt="r8">17671510370172</Timestamp><Current dt:…	59.965	1.0.0.21	1	2016978559	2.0.10.182	10-22-2021	2021-10-22 02:00:16	10:00:16	2.0.10.92	1	affpro	WordList	1	1	1	33	f	NULL	NULL	2	NULL	NULL	NULL	NULL	NULL	NULL	NULL	NULL	NULL	NULL	NULL	NULL	NULL	NULL	NULL	NULL	pra2	taskList1	抗虫害棉花	NULL	NULL	NULL	NULL	NULL	NULL	NULL
大创sc-iat	2	2	<?xml version="1.0"?>\n<Clock xmlns:dt="urn:schemas-microsoft-com:datatypes"><Description dt:dt="string">E-Prime Primary Realtime Clock</Description><StartTime><Timestamp dt:dt="int">0</Timestamp><DateUtc dt:dt="string">2021-10-22T02:00:14Z</DateUtc></StartTime><FrequencyChanges><FrequencyChange><Frequency dt:dt="r8">10000000</Frequency><Timestamp dt:dt="r8">17671510370172</Timestamp><Current dt:…	59.965	1.0.0.21	1	2016978559	2.0.10.182	10-22-2021	2021-10-22 02:00:16	10:00:16	2.0.10.92	1	affpro	WordList	1	1	1	34	f	NULL	NULL	NULL	NULL	NULL	NULL	NULL	NULL	NULL	NULL	1	NULL	NULL	NULL	NULL	NULL	NULL	NULL	NULL	pra2	taskList1	科学的	NULL	NULL	NULL	NULL	NULL	NULL	NULL
大创sc-iat	2	2	<?xml version="1.0"?>\n<Clock xmlns:dt="urn:schemas-microsoft-com:datatypes"><Description dt:dt="string">E-Prime Primary Realtime Clock</Description><StartTime><Timestamp dt:dt="int">0</Timestamp><DateUtc dt:dt="string">2021-10-22T02:00:14Z</DateUtc></StartTime><FrequencyChanges><FrequencyChange><Frequency dt:dt="r8">10000000</Frequency><Timestamp dt:dt="r8">17671510370172</Timestamp><Current dt:…	59.965	1.0.0.21	1	2016978559	2.0.10.182	10-22-2021	2021-10-22 02:00:16	10:00:16	2.0.10.92	1	affpro	WordList	1	1	1	35	j	NULL	NULL	NULL	NULL	NULL	NULL	4	NULL	NULL	NULL	NULL	NULL	NULL	NULL	NULL	NULL	NULL	NULL	NULL	pra2	taskList1	有争议的	NULL	NULL	NULL	NULL	NULL	NULL	NULL
大创sc-iat	2	2	<?xml version="1.0"?>\n<Clock xmlns:dt="urn:schemas-microsoft-com:datatypes"><Description dt:dt="string">E-Prime Primary Realtime Clock</Description><StartTime><Timestamp dt:dt="int">0</Timestamp><DateUtc dt:dt="string">2021-10-22T02:00:14Z</DateUtc></StartTime><FrequencyChanges><FrequencyChange><Frequency dt:dt="r8">10000000</Frequency><Timestamp dt:dt="r8">17671510370172</Timestamp><Current dt:…	59.965	1.0.0.21	1	2016978559	2.0.10.182	10-22-2021	2021-10-22 02:00:16	10:00:16	2.0.10.92	1	affpro	WordList	1	1	1	36	j	NULL	NULL	NULL	NULL	NULL	NULL	3	NULL	NULL	NULL	NULL	NULL	NULL	NULL	NULL	NULL	NULL	NULL	NULL	pra2	taskList1	非天然的	NULL	NULL	NULL	NULL	NULL	NULL	NULL
大创sc-iat	2	2	<?xml version="1.0"?>\n<Clock xmlns:dt="urn:schemas-microsoft-com:datatypes"><Description dt:dt="string">E-Prime Primary Realtime Clock</Description><StartTime><Timestamp dt:dt="int">0</Timestamp><DateUtc dt:dt="string">2021-10-22T02:00:14Z</DateUtc></StartTime><FrequencyChanges><FrequencyChange><Frequency dt:dt="r8">10000000</Frequency><Timestamp dt:dt="r8">17671510370172</Timestamp><Current dt:…	59.965	1.0.0.21	1	2016978559	2.0.10.182	10-22-2021	2021-10-22 02:00:16	10:00:16	2.0.10.92	1	affpro	WordList	1	1	1	37	f	NULL	NULL	NULL	NULL	NULL	NULL	NULL	NULL	NULL	NULL	4	NULL	NULL	NULL	NULL	NULL	NULL	NULL	NULL	pra2	taskList1	创新的	NULL	NULL	NULL	NULL	NULL	NULL	NULL
大创sc-iat	2	2	<?xml version="1.0"?>\n<Clock xmlns:dt="urn:schemas-microsoft-com:datatypes"><Description dt:dt="string">E-Prime Primary Realtime Clock</Description><StartTime><Timestamp dt:dt="int">0</Timestamp><DateUtc dt:dt="string">2021-10-22T02:00:14Z</DateUtc></StartTime><FrequencyChanges><FrequencyChange><Frequency dt:dt="r8">10000000</Frequency><Timestamp dt:dt="r8">17671510370172</Timestamp><Current dt:…	59.965	1.0.0.21	1	2016978559	2.0.10.182	10-22-2021	2021-10-22 02:00:16	10:00:16	2.0.10.92	1	affpro	WordList	1	1	1	38	f	NULL	NULL	3	NULL	NULL	NULL	NULL	NULL	NULL	NULL	NULL	NULL	NULL	NULL	NULL	NULL	NULL	NULL	NULL	pra2	taskList1	转基因大豆	NULL	NULL	NULL	NULL	NULL	NULL	NULL
大创sc-iat	2	2	<?xml version="1.0"?>\n<Clock xmlns:dt="urn:schemas-microsoft-com:datatypes"><Description dt:dt="string">E-Prime Primary Realtime Clock</Description><StartTime><Timestamp dt:dt="int">0</Timestamp><DateUtc dt:dt="string">2021-10-22T02:00:14Z</DateUtc></StartTime><FrequencyChanges><FrequencyChange><Frequency dt:dt="r8">10000000</Frequency><Timestamp dt:dt="r8">17671510370172</Timestamp><Current dt:…	59.965	1.0.0.21	1	2016978559	2.0.10.182	10-22-2021	2021-10-22 02:00:16	10:00:16	2.0.10.92	1	affpro	WordList	1	1	1	39	j	NULL	NULL	NULL	NULL	NULL	NULL	2	NULL	NULL	NULL	NULL	NULL	NULL	NULL	NULL	NULL	NULL	NULL	NULL	pra2	taskList1	高风险的	NULL	NULL	NULL	NULL	NULL	NULL	NULL
大创sc-iat	2	2	<?xml version="1.0"?>\n<Clock xmlns:dt="urn:schemas-microsoft-com:datatypes"><Description dt:dt="string">E-Prime Primary Realtime Clock</Description><StartTime><Timestamp dt:dt="int">0</Timestamp><DateUtc dt:dt="string">2021-10-22T02:00:14Z</DateUtc></StartTime><FrequencyChanges><FrequencyChange><Frequency dt:dt="r8">10000000</Frequency><Timestamp dt:dt="r8">17671510370172</Timestamp><Current dt:…	59.965	1.0.0.21	1	2016978559	2.0.10.182	10-22-2021	2021-10-22 02:00:16	10:00:16	2.0.10.92	1	affpro	WordList	1	1	1	40	j	NULL	NULL	NULL	NULL	NULL	NULL	1	NULL	NULL	NULL	NULL	NULL	NULL	NULL	NULL	NULL	NULL	NULL	NULL	pra2	taskList1	不成熟的	NULL	NULL	NULL	NULL	NULL	NULL	NULL
大创sc-iat	2	2	<?xml version="1.0"?>\n<Clock xmlns:dt="urn:schemas-microsoft-com:datatypes"><Description dt:dt="string">E-Prime Primary Realtime Clock</Description><StartTime><Timestamp dt:dt="int">0</Timestamp><DateUtc dt:dt="string">2021-10-22T02:00:14Z</DateUtc></StartTime><FrequencyChanges><FrequencyChange><Frequency dt:dt="r8">10000000</Frequency><Timestamp dt:dt="r8">17671510370172</Timestamp><Current dt:…	59.965	1.0.0.21	1	2016978559	2.0.10.182	10-22-2021	2021-10-22 02:00:16	10:00:16	2.0.10.92	1	affpro	WordList	1	1	1	41	f	NULL	NULL	2	NULL	NULL	NULL	NULL	NULL	NULL	NULL	NULL	NULL	NULL	NULL	NULL	NULL	NULL	NULL	NULL	pra2	taskList1	抗虫害棉花	NULL	NULL	NULL	NULL	NULL	NULL	NULL
大创sc-iat	2	2	<?xml version="1.0"?>\n<Clock xmlns:dt="urn:schemas-microsoft-com:datatypes"><Description dt:dt="string">E-Prime Primary Realtime Clock</Description><StartTime><Timestamp dt:dt="int">0</Timestamp><DateUtc dt:dt="string">2021-10-22T02:00:14Z</DateUtc></StartTime><FrequencyChanges><FrequencyChange><Frequency dt:dt="r8">10000000</Frequency><Timestamp dt:dt="r8">17671510370172</Timestamp><Current dt:…	59.965	1.0.0.21	1	2016978559	2.0.10.182	10-22-2021	2021-10-22 02:00:16	10:00:16	2.0.10.92	1	affpro	WordList	1	1	1	42	f	NULL	NULL	NULL	NULL	NULL	NULL	NULL	NULL	NULL	NULL	3	NULL	NULL	NULL	NULL	NULL	NULL	NULL	NULL	pra2	taskList1	高科技的	NULL	NULL	NULL	NULL	NULL	NULL	NULL
大创sc-iat	2	2	<?xml version="1.0"?>\n<Clock xmlns:dt="urn:schemas-microsoft-com:datatypes"><Description dt:dt="string">E-Prime Primary Realtime Clock</Description><StartTime><Timestamp dt:dt="int">0</Timestamp><DateUtc dt:dt="string">2021-10-22T02:00:14Z</DateUtc></StartTime><FrequencyChanges><FrequencyChange><Frequency dt:dt="r8">10000000</Frequency><Timestamp dt:dt="r8">17671510370172</Timestamp><Current dt:…	59.965	1.0.0.21	1	2016978559	2.0.10.182	10-22-2021	2021-10-22 02:00:16	10:00:16	2.0.10.92	1	affpro	WordList	1	1	1	43	j	NULL	NULL	NULL	NULL	NULL	NULL	2	NULL	NULL	NULL	NULL	NULL	NULL	NULL	NULL	NULL	NULL	NULL	NULL	pra2	taskList1	高风险的	NULL	NULL	NULL	NULL	NULL	NULL	NULL
大创sc-iat	2	2	<?xml version="1.0"?>\n<Clock xmlns:dt="urn:schemas-microsoft-com:datatypes"><Description dt:dt="string">E-Prime Primary Realtime Clock</Description><StartTime><Timestamp dt:dt="int">0</Timestamp><DateUtc dt:dt="string">2021-10-22T02:00:14Z</DateUtc></StartTime><FrequencyChanges><FrequencyChange><Frequency dt:dt="r8">10000000</Frequency><Timestamp dt:dt="r8">17671510370172</Timestamp><Current dt:…	59.965	1.0.0.21	1	2016978559	2.0.10.182	10-22-2021	2021-10-22 02:00:16	10:00:16	2.0.10.92	1	affpro	WordList	1	1	1	44	j	NULL	NULL	NULL	NULL	NULL	NULL	3	NULL	NULL	NULL	NULL	NULL	NULL	NULL	NULL	NULL	NULL	NULL	NULL	pra2	taskList1	非天然的	NULL	NULL	NULL	NULL	NULL	NULL	NULL
大创sc-iat	2	2	<?xml version="1.0"?>\n<Clock xmlns:dt="urn:schemas-microsoft-com:datatypes"><Description dt:dt="string">E-Prime Primary Realtime Clock</Description><StartTime><Timestamp dt:dt="int">0</Timestamp><DateUtc dt:dt="string">2021-10-22T02:00:14Z</DateUtc></StartTime><FrequencyChanges><FrequencyChange><Frequency dt:dt="r8">10000000</Frequency><Timestamp dt:dt="r8">17671510370172</Timestamp><Current dt:…	59.965	1.0.0.21	1	2016978559	2.0.10.182	10-22-2021	2021-10-22 02:00:16	10:00:16	2.0.10.92	1	affpro	WordList	1	1	1	45	f	NULL	NULL	1	NULL	NULL	NULL	NULL	NULL	NULL	NULL	NULL	NULL	NULL	NULL	NULL	NULL	NULL	NULL	NULL	pra2	taskList1	转基因食物	NULL	NULL	NULL	NULL	NULL	NULL	NULL
大创sc-iat	2	2	<?xml version="1.0"?>\n<Clock xmlns:dt="urn:schemas-microsoft-com:datatypes"><Description dt:dt="string">E-Prime Primary Realtime Clock</Description><StartTime><Timestamp dt:dt="int">0</Timestamp><DateUtc dt:dt="string">2021-10-22T02:00:14Z</DateUtc></StartTime><FrequencyChanges><FrequencyChange><Frequency dt:dt="r8">10000000</Frequency><Timestamp dt:dt="r8">17671510370172</Timestamp><Current dt:…	59.965	1.0.0.21	1	2016978559	2.0.10.182	10-22-2021	2021-10-22 02:00:16	10:00:16	2.0.10.92	1	affpro	WordList	1	1	1	46	j	NULL	NULL	NULL	NULL	NULL	NULL	1	NULL	NULL	NULL	NULL	NULL	NULL	NULL	NULL	NULL	NULL	NULL	NULL	pra2	taskList1	不成熟的	NULL	NULL	NULL	NULL	NULL	NULL	NULL
大创sc-iat	2	2	<?xml version="1.0"?>\n<Clock xmlns:dt="urn:schemas-microsoft-com:datatypes"><Description dt:dt="string">E-Prime Primary Realtime Clock</Description><StartTime><Timestamp dt:dt="int">0</Timestamp><DateUtc dt:dt="string">2021-10-22T02:00:14Z</DateUtc></StartTime><FrequencyChanges><FrequencyChange><Frequency dt:dt="r8">10000000</Frequency><Timestamp dt:dt="r8">17671510370172</Timestamp><Current dt:…	59.965	1.0.0.21	1	2016978559	2.0.10.182	10-22-2021	2021-10-22 02:00:16	10:00:16	2.0.10.92	1	affpro	WordList	1	1	1	47	j	NULL	NULL	NULL	NULL	NULL	NULL	4	NULL	NULL	NULL	NULL	NULL	NULL	NULL	NULL	NULL	NULL	NULL	NULL	pra2	taskList1	有争议的	NULL	NULL	NULL	NULL	NULL	NULL	NULL
大创sc-iat	2	2	<?xml version="1.0"?>\n<Clock xmlns:dt="urn:schemas-microsoft-com:datatypes"><Description dt:dt="string">E-Prime Primary Realtime Clock</Description><StartTime><Timestamp dt:dt="int">0</Timestamp><DateUtc dt:dt="string">2021-10-22T02:00:14Z</DateUtc></StartTime><FrequencyChanges><FrequencyChange><Frequency dt:dt="r8">10000000</Frequency><Timestamp dt:dt="r8">17671510370172</Timestamp><Current dt:…	59.965	1.0.0.21	1	2016978559	2.0.10.182	10-22-2021	2021-10-22 02:00:16	10:00:16	2.0.10.92	1	affpro	WordList	1	1	1	48	f	NULL	NULL	NULL	NULL	NULL	NULL	NULL	NULL	NULL	NULL	1	NULL	NULL	NULL	NULL	NULL	NULL	NULL	NULL	pra2	taskList1	科学的	NULL	NULL	NULL	NULL	NULL	NULL	NULL
大创sc-iat	2	2	<?xml version="1.0"?>\n<Clock xmlns:dt="urn:schemas-microsoft-com:datatypes"><Description dt:dt="string">E-Prime Primary Realtime Clock</Description><StartTime><Timestamp dt:dt="int">0</Timestamp><DateUtc dt:dt="string">2021-10-22T02:00:14Z</DateUtc></StartTime><FrequencyChanges><FrequencyChange><Frequency dt:dt="r8">10000000</Frequency><Timestamp dt:dt="r8">17671510370172</Timestamp><Current dt:…	59.965	1.0.0.21	1	2016978559	2.0.10.182	10-22-2021	2021-10-22 02:00:16	10:00:16	2.0.10.92	1	affpro	WordList	1	1	1	49	f	NULL	NULL	3	NULL	NULL	NULL	NULL	NULL	NULL	NULL	NULL	NULL	NULL	NULL	NULL	NULL	NULL	NULL	NULL	pra2	taskList1	转基因大豆	NULL	NULL	NULL	NULL	NULL	NULL	NULL
大创sc-iat	2	2	<?xml version="1.0"?>\n<Clock xmlns:dt="urn:schemas-microsoft-com:datatypes"><Description dt:dt="string">E-Prime Primary Realtime Clock</Description><StartTime><Timestamp dt:dt="int">0</Timestamp><DateUtc dt:dt="string">2021-10-22T02:00:14Z</DateUtc></StartTime><FrequencyChanges><FrequencyChange><Frequency dt:dt="r8">10000000</Frequency><Timestamp dt:dt="r8">17671510370172</Timestamp><Current dt:…	59.965	1.0.0.21	1	2016978559	2.0.10.182	10-22-2021	2021-10-22 02:00:16	10:00:16	2.0.10.92	1	affpro	WordList	1	1	1	50	j	NULL	NULL	NULL	NULL	NULL	NULL	3	NULL	NULL	NULL	NULL	NULL	NULL	NULL	NULL	NULL	NULL	NULL	NULL	pra2	taskList1	非天然的	NULL	NULL	NULL	NULL	NULL	NULL	NULL
大创sc-iat	2	2	<?xml version="1.0"?>\n<Clock xmlns:dt="urn:schemas-microsoft-com:datatypes"><Description dt:dt="string">E-Prime Primary Realtime Clock</Description><StartTime><Timestamp dt:dt="int">0</Timestamp><DateUtc dt:dt="string">2021-10-22T02:00:14Z</DateUtc></StartTime><FrequencyChanges><FrequencyChange><Frequency dt:dt="r8">10000000</Frequency><Timestamp dt:dt="r8">17671510370172</Timestamp><Current dt:…	59.965	1.0.0.21	1	2016978559	2.0.10.182	10-22-2021	2021-10-22 02:00:16	10:00:16	2.0.10.92	1	affpro	WordList	1	1	1	51	j	NULL	NULL	NULL	NULL	NULL	NULL	4	NULL	NULL	NULL	NULL	NULL	NULL	NULL	NULL	NULL	NULL	NULL	NULL	pra2	taskList1	有争议的	NULL	NULL	NULL	NULL	NULL	NULL	NULL
大创sc-iat	2	2	<?xml version="1.0"?>\n<Clock xmlns:dt="urn:schemas-microsoft-com:datatypes"><Description dt:dt="string">E-Prime Primary Realtime Clock</Description><StartTime><Timestamp dt:dt="int">0</Timestamp><DateUtc dt:dt="string">2021-10-22T02:00:14Z</DateUtc></StartTime><FrequencyChanges><FrequencyChange><Frequency dt:dt="r8">10000000</Frequency><Timestamp dt:dt="r8">17671510370172</Timestamp><Current dt:…	59.965	1.0.0.21	1	2016978559	2.0.10.182	10-22-2021	2021-10-22 02:00:16	10:00:16	2.0.10.92	1	affpro	WordList	1	1	1	52	f	NULL	NULL	NULL	NULL	NULL	NULL	NULL	NULL	NULL	NULL	2	NULL	NULL	NULL	NULL	NULL	NULL	NULL	NULL	pra2	taskList1	高产的	NULL	NULL	NULL	NULL	NULL	NULL	NULL
大创sc-iat	2	2	<?xml version="1.0"?>\n<Clock xmlns:dt="urn:schemas-microsoft-com:datatypes"><Description dt:dt="string">E-Prime Primary Realtime Clock</Description><StartTime><Timestamp dt:dt="int">0</Timestamp><DateUtc dt:dt="string">2021-10-22T02:00:14Z</DateUtc></StartTime><FrequencyChanges><FrequencyChange><Frequency dt:dt="r8">10000000</Frequency><Timestamp dt:dt="r8">17671510370172</Timestamp><Current dt:…	59.965	1.0.0.21	1	2016978559	2.0.10.182	10-22-2021	2021-10-22 02:00:16	10:00:16	2.0.10.92	1	affpro	WordList	1	1	1	53	j	NULL	NULL	NULL	NULL	NULL	NULL	2	NULL	NULL	NULL	NULL	NULL	NULL	NULL	NULL	NULL	NULL	NULL	NULL	pra2	taskList1	高风险的	NULL	NULL	NULL	NULL	NULL	NULL	NULL
大创sc-iat	2	2	<?xml version="1.0"?>\n<Clock xmlns:dt="urn:schemas-microsoft-com:datatypes"><Description dt:dt="string">E-Prime Primary Realtime Clock</Description><StartTime><Timestamp dt:dt="int">0</Timestamp><DateUtc dt:dt="string">2021-10-22T02:00:14Z</DateUtc></StartTime><FrequencyChanges><FrequencyChange><Frequency dt:dt="r8">10000000</Frequency><Timestamp dt:dt="r8">17671510370172</Timestamp><Current dt:…	59.965	1.0.0.21	1	2016978559	2.0.10.182	10-22-2021	2021-10-22 02:00:16	10:00:16	2.0.10.92	1	affpro	WordList	1	1	1	54	f	NULL	NULL	4	NULL	NULL	NULL	NULL	NULL	NULL	NULL	NULL	NULL	NULL	NULL	NULL	NULL	NULL	NULL	NULL	pra2	taskList1	动物转基因	NULL	NULL	NULL	NULL	NULL	NULL	NULL
大创sc-iat	2	2	<?xml version="1.0"?>\n<Clock xmlns:dt="urn:schemas-microsoft-com:datatypes"><Description dt:dt="string">E-Prime Primary Realtime Clock</Description><StartTime><Timestamp dt:dt="int">0</Timestamp><DateUtc dt:dt="string">2021-10-22T02:00:14Z</DateUtc></StartTime><FrequencyChanges><FrequencyChange><Frequency dt:dt="r8">10000000</Frequency><Timestamp dt:dt="r8">17671510370172</Timestamp><Current dt:…	59.965	1.0.0.21	1	2016978559	2.0.10.182	10-22-2021	2021-10-22 02:00:16	10:00:16	2.0.10.92	1	affpro	WordList	1	1	1	55	f	NULL	NULL	NULL	NULL	NULL	NULL	NULL	NULL	NULL	NULL	4	NULL	NULL	NULL	NULL	NULL	NULL	NULL	NULL	pra2	taskList1	创新的	NULL	NULL	NULL	NULL	NULL	NULL	NULL
大创sc-iat	2	2	<?xml version="1.0"?>\n<Clock xmlns:dt="urn:schemas-microsoft-com:datatypes"><Description dt:dt="string">E-Prime Primary Realtime Clock</Description><StartTime><Timestamp dt:dt="int">0</Timestamp><DateUtc dt:dt="string">2021-10-22T02:00:14Z</DateUtc></StartTime><FrequencyChanges><FrequencyChange><Frequency dt:dt="r8">10000000</Frequency><Timestamp dt:dt="r8">17671510370172</Timestamp><Current dt:…	59.965	1.0.0.21	1	2016978559	2.0.10.182	10-22-2021	2021-10-22 02:00:16	10:00:16	2.0.10.92	1	affpro	WordList	1	1	1	56	j	NULL	NULL	NULL	NULL	NULL	NULL	1	NULL	NULL	NULL	NULL	NULL	NULL	NULL	NULL	NULL	NULL	NULL	NULL	pra2	taskList1	不成熟的	NULL	NULL	NULL	NULL	NULL	NULL	NULL
大创sc-iat	2	2	<?xml version="1.0"?>\n<Clock xmlns:dt="urn:schemas-microsoft-com:datatypes"><Description dt:dt="string">E-Prime Primary Realtime Clock</Description><StartTime><Timestamp dt:dt="int">0</Timestamp><DateUtc dt:dt="string">2021-10-22T02:00:14Z</DateUtc></StartTime><FrequencyChanges><FrequencyChange><Frequency dt:dt="r8">10000000</Frequency><Timestamp dt:dt="r8">17671510370172</Timestamp><Current dt:…	59.965	1.0.0.21	1	2016978559	2.0.10.182	10-22-2021	2021-10-22 02:00:16	10:00:16	2.0.10.92	1	affpro	WordList	1	1	1	57	f	NULL	NULL	3	NULL	NULL	NULL	NULL	NULL	NULL	NULL	NULL	NULL	NULL	NULL	NULL	NULL	NULL	NULL	NULL	pra2	taskList1	转基因大豆	NULL	NULL	NULL	NULL	NULL	NULL	NULL
大创sc-iat	2	2	<?xml version="1.0"?>\n<Clock xmlns:dt="urn:schemas-microsoft-com:datatypes"><Description dt:dt="string">E-Prime Primary Realtime Clock</Description><StartTime><Timestamp dt:dt="int">0</Timestamp><DateUtc dt:dt="string">2021-10-22T02:00:14Z</DateUtc></StartTime><FrequencyChanges><FrequencyChange><Frequency dt:dt="r8">10000000</Frequency><Timestamp dt:dt="r8">17671510370172</Timestamp><Current dt:…	59.965	1.0.0.21	1	2016978559	2.0.10.182	10-22-2021	2021-10-22 02:00:16	10:00:16	2.0.10.92	1	affpro	WordList	1	1	1	58	j	NULL	NULL	NULL	NULL	NULL	NULL	2	NULL	NULL	NULL	NULL	NULL	NULL	NULL	NULL	NULL	NULL	NULL	NULL	pra2	taskList1	高风险的	NULL	NULL	NULL	NULL	NULL	NULL	NULL
大创sc-iat	2	2	<?xml version="1.0"?>\n<Clock xmlns:dt="urn:schemas-microsoft-com:datatypes"><Description dt:dt="string">E-Prime Primary Realtime Clock</Description><StartTime><Timestamp dt:dt="int">0</Timestamp><DateUtc dt:dt="string">2021-10-22T02:00:14Z</DateUtc></StartTime><FrequencyChanges><FrequencyChange><Frequency dt:dt="r8">10000000</Frequency><Timestamp dt:dt="r8">17671510370172</Timestamp><Current dt:…	59.965	1.0.0.21	1	2016978559	2.0.10.182	10-22-2021	2021-10-22 02:00:16	10:00:16	2.0.10.92	1	affpro	WordList	1	1	1	59	j	NULL	NULL	NULL	NULL	NULL	NULL	3	NULL	NULL	NULL	NULL	NULL	NULL	NULL	NULL	NULL	NULL	NULL	NULL	pra2	taskList1	非天然的	NULL	NULL	NULL	NULL	NULL	NULL	NULL
大创sc-iat	2	2	<?xml version="1.0"?>\n<Clock xmlns:dt="urn:schemas-microsoft-com:datatypes"><Description dt:dt="string">E-Prime Primary Realtime Clock</Description><StartTime><Timestamp dt:dt="int">0</Timestamp><DateUtc dt:dt="string">2021-10-22T02:00:14Z</DateUtc></StartTime><FrequencyChanges><FrequencyChange><Frequency dt:dt="r8">10000000</Frequency><Timestamp dt:dt="r8">17671510370172</Timestamp><Current dt:…	59.965	1.0.0.21	1	2016978559	2.0.10.182	10-22-2021	2021-10-22 02:00:16	10:00:16	2.0.10.92	1	affpro	WordList	1	1	1	60	f	NULL	NULL	NULL	NULL	NULL	NULL	NULL	NULL	NULL	NULL	2	NULL	NULL	NULL	NULL	NULL	NULL	NULL	NULL	pra2	taskList1	高产的	NULL	NULL	NULL	NULL	NULL	NULL	NULL
大创sc-iat	2	2	<?xml version="1.0"?>\n<Clock xmlns:dt="urn:schemas-microsoft-com:datatypes"><Description dt:dt="string">E-Prime Primary Realtime Clock</Description><StartTime><Timestamp dt:dt="int">0</Timestamp><DateUtc dt:dt="string">2021-10-22T02:00:14Z</DateUtc></StartTime><FrequencyChanges><FrequencyChange><Frequency dt:dt="r8">10000000</Frequency><Timestamp dt:dt="r8">17671510370172</Timestamp><Current dt:…	59.965	1.0.0.21	1	2016978559	2.0.10.182	10-22-2021	2021-10-22 02:00:16	10:00:16	2.0.10.92	1	affpro	WordList	1	1	1	61	f	NULL	NULL	4	NULL	NULL	NULL	NULL	NULL	NULL	NULL	NULL	NULL	NULL	NULL	NULL	NULL	NULL	NULL	NULL	pra2	taskList1	动物转基因	NULL	NULL	NULL	NULL	NULL	NULL	NULL
大创sc-iat	2	2	<?xml version="1.0"?>\n<Clock xmlns:dt="urn:schemas-microsoft-com:datatypes"><Description dt:dt="string">E-Prime Primary Realtime Clock</Description><StartTime><Timestamp dt:dt="int">0</Timestamp><DateUtc dt:dt="string">2021-10-22T02:00:14Z</DateUtc></StartTime><FrequencyChanges><FrequencyChange><Frequency dt:dt="r8">10000000</Frequency><Timestamp dt:dt="r8">17671510370172</Timestamp><Current dt:…	59.965	1.0.0.21	1	2016978559	2.0.10.182	10-22-2021	2021-10-22 02:00:16	10:00:16	2.0.10.92	1	affpro	WordList	1	1	1	62	f	NULL	NULL	NULL	NULL	NULL	NULL	NULL	NULL	NULL	NULL	1	NULL	NULL	NULL	NULL	NULL	NULL	NULL	NULL	pra2	taskList1	科学的	NULL	NULL	NULL	NULL	NULL	NULL	NULL
大创sc-iat	2	2	<?xml version="1.0"?>\n<Clock xmlns:dt="urn:schemas-microsoft-com:datatypes"><Description dt:dt="string">E-Prime Primary Realtime Clock</Description><StartTime><Timestamp dt:dt="int">0</Timestamp><DateUtc dt:dt="string">2021-10-22T02:00:14Z</DateUtc></StartTime><FrequencyChanges><FrequencyChange><Frequency dt:dt="r8">10000000</Frequency><Timestamp dt:dt="r8">17671510370172</Timestamp><Current dt:…	59.965	1.0.0.21	1	2016978559	2.0.10.182	10-22-2021	2021-10-22 02:00:16	10:00:16	2.0.10.92	1	affpro	WordList	1	1	1	63	j	NULL	NULL	NULL	NULL	NULL	NULL	1	NULL	NULL	NULL	NULL	NULL	NULL	NULL	NULL	NULL	NULL	NULL	NULL	pra2	taskList1	不成熟的	NULL	NULL	NULL	NULL	NULL	NULL	NULL
大创sc-iat	2	2	<?xml version="1.0"?>\n<Clock xmlns:dt="urn:schemas-microsoft-com:datatypes"><Description dt:dt="string">E-Prime Primary Realtime Clock</Description><StartTime><Timestamp dt:dt="int">0</Timestamp><DateUtc dt:dt="string">2021-10-22T02:00:14Z</DateUtc></StartTime><FrequencyChanges><FrequencyChange><Frequency dt:dt="r8">10000000</Frequency><Timestamp dt:dt="r8">17671510370172</Timestamp><Current dt:…	59.965	1.0.0.21	1	2016978559	2.0.10.182	10-22-2021	2021-10-22 02:00:16	10:00:16	2.0.10.92	1	affpro	WordList	1	1	1	64	j	NULL	NULL	NULL	NULL	NULL	NULL	4	NULL	NULL	NULL	NULL	NULL	NULL	NULL	NULL	NULL	NULL	NULL	NULL	pra2	taskList1	有争议的	NULL	NULL	NULL	NULL	NULL	NULL	NULL
大创sc-iat	2	2	<?xml version="1.0"?>\n<Clock xmlns:dt="urn:schemas-microsoft-com:datatypes"><Description dt:dt="string">E-Prime Primary Realtime Clock</Description><StartTime><Timestamp dt:dt="int">0</Timestamp><DateUtc dt:dt="string">2021-10-22T02:00:14Z</DateUtc></StartTime><FrequencyChanges><FrequencyChange><Frequency dt:dt="r8">10000000</Frequency><Timestamp dt:dt="r8">17671510370172</Timestamp><Current dt:…	59.965	1.0.0.21	1	2016978559	2.0.10.182	10-22-2021	2021-10-22 02:00:16	10:00:16	2.0.10.92	1	affpro	WordList	1	1	1	65	f	NULL	NULL	2	NULL	NULL	NULL	NULL	NULL	NULL	NULL	NULL	NULL	NULL	NULL	NULL	NULL	NULL	NULL	NULL	pra2	taskList1	抗虫害棉花	NULL	NULL	NULL	NULL	NULL	NULL	NULL
大创sc-iat	2	2	<?xml version="1.0"?>\n<Clock xmlns:dt="urn:schemas-microsoft-com:datatypes"><Description dt:dt="string">E-Prime Primary Realtime Clock</Description><StartTime><Timestamp dt:dt="int">0</Timestamp><DateUtc dt:dt="string">2021-10-22T02:00:14Z</DateUtc></StartTime><FrequencyChanges><FrequencyChange><Frequency dt:dt="r8">10000000</Frequency><Timestamp dt:dt="r8">17671510370172</Timestamp><Current dt:…	59.965	1.0.0.21	1	2016978559	2.0.10.182	10-22-2021	2021-10-22 02:00:16	10:00:16	2.0.10.92	1	affpro	WordList	1	1	1	66	j	NULL	NULL	NULL	NULL	NULL	NULL	1	NULL	NULL	NULL	NULL	NULL	NULL	NULL	NULL	NULL	NULL	NULL	NULL	pra2	taskList1	不成熟的	NULL	NULL	NULL	NULL	NULL	NULL	NULL
大创sc-iat	2	2	<?xml version="1.0"?>\n<Clock xmlns:dt="urn:schemas-microsoft-com:datatypes"><Description dt:dt="string">E-Prime Primary Realtime Clock</Description><StartTime><Timestamp dt:dt="int">0</Timestamp><DateUtc dt:dt="string">2021-10-22T02:00:14Z</DateUtc></StartTime><FrequencyChanges><FrequencyChange><Frequency dt:dt="r8">10000000</Frequency><Timestamp dt:dt="r8">17671510370172</Timestamp><Current dt:…	59.965	1.0.0.21	1	2016978559	2.0.10.182	10-22-2021	2021-10-22 02:00:16	10:00:16	2.0.10.92	1	affpro	WordList	1	1	1	67	f	NULL	NULL	NULL	NULL	NULL	NULL	NULL	NULL	NULL	NULL	4	NULL	NULL	NULL	NULL	NULL	NULL	NULL	NULL	pra2	taskList1	创新的	NULL	NULL	NULL	NULL	NULL	NULL	NULL
大创sc-iat	2	2	<?xml version="1.0"?>\n<Clock xmlns:dt="urn:schemas-microsoft-com:datatypes"><Description dt:dt="string">E-Prime Primary Realtime Clock</Description><StartTime><Timestamp dt:dt="int">0</Timestamp><DateUtc dt:dt="string">2021-10-22T02:00:14Z</DateUtc></StartTime><FrequencyChanges><FrequencyChange><Frequency dt:dt="r8">10000000</Frequency><Timestamp dt:dt="r8">17671510370172</Timestamp><Current dt:…	59.965	1.0.0.21	1	2016978559	2.0.10.182	10-22-2021	2021-10-22 02:00:16	10:00:16	2.0.10.92	1	affpro	WordList	1	1	1	68	j	NULL	NULL	NULL	NULL	NULL	NULL	4	NULL	NULL	NULL	NULL	NULL	NULL	NULL	NULL	NULL	NULL	NULL	NULL	pra2	taskList1	有争议的	NULL	NULL	NULL	NULL	NULL	NULL	NULL
大创sc-iat	2	2	<?xml version="1.0"?>\n<Clock xmlns:dt="urn:schemas-microsoft-com:datatypes"><Description dt:dt="string">E-Prime Primary Realtime Clock</Description><StartTime><Timestamp dt:dt="int">0</Timestamp><DateUtc dt:dt="string">2021-10-22T02:00:14Z</DateUtc></StartTime><FrequencyChanges><FrequencyChange><Frequency dt:dt="r8">10000000</Frequency><Timestamp dt:dt="r8">17671510370172</Timestamp><Current dt:…	59.965	1.0.0.21	1	2016978559	2.0.10.182	10-22-2021	2021-10-22 02:00:16	10:00:16	2.0.10.92	1	affpro	WordList	1	1	1	69	f	NULL	NULL	1	NULL	NULL	NULL	NULL	NULL	NULL	NULL	NULL	NULL	NULL	NULL	NULL	NULL	NULL	NULL	NULL	pra2	taskList1	转基因食物	NULL	NULL	NULL	NULL	NULL	NULL	NULL
大创sc-iat	2	2	<?xml version="1.0"?>\n<Clock xmlns:dt="urn:schemas-microsoft-com:datatypes"><Description dt:dt="string">E-Prime Primary Realtime Clock</Description><StartTime><Timestamp dt:dt="int">0</Timestamp><DateUtc dt:dt="string">2021-10-22T02:00:14Z</DateUtc></StartTime><FrequencyChanges><FrequencyChange><Frequency dt:dt="r8">10000000</Frequency><Timestamp dt:dt="r8">17671510370172</Timestamp><Current dt:…	59.965	1.0.0.21	1	2016978559	2.0.10.182	10-22-2021	2021-10-22 02:00:16	10:00:16	2.0.10.92	1	affpro	WordList	1	1	1	70	j	NULL	NULL	NULL	NULL	NULL	NULL	2	NULL	NULL	NULL	NULL	NULL	NULL	NULL	NULL	NULL	NULL	NULL	NULL	pra2	taskList1	高风险的	NULL	NULL	NULL	NULL	NULL	NULL	NULL
大创sc-iat	2	2	<?xml version="1.0"?>\n<Clock xmlns:dt="urn:schemas-microsoft-com:datatypes"><Description dt:dt="string">E-Prime Primary Realtime Clock</Description><StartTime><Timestamp dt:dt="int">0</Timestamp><DateUtc dt:dt="string">2021-10-22T02:00:14Z</DateUtc></StartTime><FrequencyChanges><FrequencyChange><Frequency dt:dt="r8">10000000</Frequency><Timestamp dt:dt="r8">17671510370172</Timestamp><Current dt:…	59.965	1.0.0.21	1	2016978559	2.0.10.182	10-22-2021	2021-10-22 02:00:16	10:00:16	2.0.10.92	1	affpro	WordList	1	1	1	71	j	NULL	NULL	NULL	NULL	NULL	NULL	3	NULL	NULL	NULL	NULL	NULL	NULL	NULL	NULL	NULL	NULL	NULL	NULL	pra2	taskList1	非天然的	NULL	NULL	NULL	NULL	NULL	NULL	NULL
大创sc-iat	2	2	<?xml version="1.0"?>\n<Clock xmlns:dt="urn:schemas-microsoft-com:datatypes"><Description dt:dt="string">E-Prime Primary Realtime Clock</Description><StartTime><Timestamp dt:dt="int">0</Timestamp><DateUtc dt:dt="string">2021-10-22T02:00:14Z</DateUtc></StartTime><FrequencyChanges><FrequencyChange><Frequency dt:dt="r8">10000000</Frequency><Timestamp dt:dt="r8">17671510370172</Timestamp><Current dt:…	59.965	1.0.0.21	1	2016978559	2.0.10.182	10-22-2021	2021-10-22 02:00:16	10:00:16	2.0.10.92	1	affpro	WordList	1	1	1	72	f	NULL	NULL	NULL	NULL	NULL	NULL	NULL	NULL	NULL	NULL	3	NULL	NULL	NULL	NULL	NULL	NULL	NULL	NULL	pra2	taskList1	高科技的	NULL	NULL	NULL	NULL	NULL	NULL	NULL
大创sc-iat	2	2	<?xml version="1.0"?>\n<Clock xmlns:dt="urn:schemas-microsoft-com:datatypes"><Description dt:dt="string">E-Prime Primary Realtime Clock</Description><StartTime><Timestamp dt:dt="int">0</Timestamp><DateUtc dt:dt="string">2021-10-22T02:00:14Z</DateUtc></StartTime><FrequencyChanges><FrequencyChange><Frequency dt:dt="r8">10000000</Frequency><Timestamp dt:dt="r8">17671510370172</Timestamp><Current dt:…	59.965	1.0.0.21	1	2016978559	2.0.10.182	10-22-2021	2021-10-22 02:00:16	10:00:16	2.0.10.92	1	affpro	WordList	1	1	1	73	j	NULL	NULL	NULL	NULL	NULL	NULL	1	NULL	NULL	NULL	NULL	NULL	NULL	NULL	NULL	NULL	NULL	NULL	NULL	pra2	taskList1	不成熟的	NULL	NULL	NULL	NULL	NULL	NULL	NULL
大创sc-iat	2	2	<?xml version="1.0"?>\n<Clock xmlns:dt="urn:schemas-microsoft-com:datatypes"><Description dt:dt="string">E-Prime Primary Realtime Clock</Description><StartTime><Timestamp dt:dt="int">0</Timestamp><DateUtc dt:dt="string">2021-10-22T02:00:14Z</DateUtc></StartTime><FrequencyChanges><FrequencyChange><Frequency dt:dt="r8">10000000</Frequency><Timestamp dt:dt="r8">17671510370172</Timestamp><Current dt:…	59.965	1.0.0.21	1	2016978559	2.0.10.182	10-22-2021	2021-10-22 02:00:16	10:00:16	2.0.10.92	1	affpro	WordList	1	1	1	74	j	NULL	NULL	NULL	NULL	NULL	NULL	2	NULL	NULL	NULL	NULL	NULL	NULL	NULL	NULL	NULL	NULL	NULL	NULL	pra2	taskList1	高风险的	NULL	NULL	NULL	NULL	NULL	NULL	NULL
大创sc-iat	2	2	<?xml version="1.0"?>\n<Clock xmlns:dt="urn:schemas-microsoft-com:datatypes"><Description dt:dt="string">E-Prime Primary Realtime Clock</Description><StartTime><Timestamp dt:dt="int">0</Timestamp><DateUtc dt:dt="string">2021-10-22T02:00:14Z</DateUtc></StartTime><FrequencyChanges><FrequencyChange><Frequency dt:dt="r8">10000000</Frequency><Timestamp dt:dt="r8">17671510370172</Timestamp><Current dt:…	59.965	1.0.0.21	1	2016978559	2.0.10.182	10-22-2021	2021-10-22 02:00:16	10:00:16	2.0.10.92	1	affpro	WordList	1	1	1	75	f	NULL	NULL	NULL	NULL	NULL	NULL	NULL	NULL	NULL	NULL	2	NULL	NULL	NULL	NULL	NULL	NULL	NULL	NULL	pra2	taskList1	高产的	NULL	NULL	NULL	NULL	NULL	NULL	NULL
大创sc-iat	2	2	<?xml version="1.0"?>\n<Clock xmlns:dt="urn:schemas-microsoft-com:datatypes"><Description dt:dt="string">E-Prime Primary Realtime Clock</Description><StartTime><Timestamp dt:dt="int">0</Timestamp><DateUtc dt:dt="string">2021-10-22T02:00:14Z</DateUtc></StartTime><FrequencyChanges><FrequencyChange><Frequency dt:dt="r8">10000000</Frequency><Timestamp dt:dt="r8">17671510370172</Timestamp><Current dt:…	59.965	1.0.0.21	1	2016978559	2.0.10.182	10-22-2021	2021-10-22 02:00:16	10:00:16	2.0.10.92	1	affpro	WordList	1	1	1	76	f	NULL	NULL	4	NULL	NULL	NULL	NULL	NULL	NULL	NULL	NULL	NULL	NULL	NULL	NULL	NULL	NULL	NULL	NULL	pra2	taskList1	动物转基因	NULL	NULL	NULL	NULL	NULL	NULL	NULL
大创sc-iat	2	2	<?xml version="1.0"?>\n<Clock xmlns:dt="urn:schemas-microsoft-com:datatypes"><Description dt:dt="string">E-Prime Primary Realtime Clock</Description><StartTime><Timestamp dt:dt="int">0</Timestamp><DateUtc dt:dt="string">2021-10-22T02:00:14Z</DateUtc></StartTime><FrequencyChanges><FrequencyChange><Frequency dt:dt="r8">10000000</Frequency><Timestamp dt:dt="r8">17671510370172</Timestamp><Current dt:…	59.965	1.0.0.21	1	2016978559	2.0.10.182	10-22-2021	2021-10-22 02:00:16	10:00:16	2.0.10.92	1	affpro	WordList	1	1	1	77	j	NULL	NULL	NULL	NULL	NULL	NULL	3	NULL	NULL	NULL	NULL	NULL	NULL	NULL	NULL	NULL	NULL	NULL	NULL	pra2	taskList1	非天然的	NULL	NULL	NULL	NULL	NULL	NULL	NULL
大创sc-iat	2	2	<?xml version="1.0"?>\n<Clock xmlns:dt="urn:schemas-microsoft-com:datatypes"><Description dt:dt="string">E-Prime Primary Realtime Clock</Description><StartTime><Timestamp dt:dt="int">0</Timestamp><DateUtc dt:dt="string">2021-10-22T02:00:14Z</DateUtc></StartTime><FrequencyChanges><FrequencyChange><Frequency dt:dt="r8">10000000</Frequency><Timestamp dt:dt="r8">17671510370172</Timestamp><Current dt:…	59.965	1.0.0.21	1	2016978559	2.0.10.182	10-22-2021	2021-10-22 02:00:16	10:00:16	2.0.10.92	1	affpro	WordList	1	1	1	78	f	NULL	NULL	2	NULL	NULL	NULL	NULL	NULL	NULL	NULL	NULL	NULL	NULL	NULL	NULL	NULL	NULL	NULL	NULL	pra2	taskList1	抗虫害棉花	NULL	NULL	NULL	NULL	NULL	NULL	NULL
大创sc-iat	2	2	<?xml version="1.0"?>\n<Clock xmlns:dt="urn:schemas-microsoft-com:datatypes"><Description dt:dt="string">E-Prime Primary Realtime Clock</Description><StartTime><Timestamp dt:dt="int">0</Timestamp><DateUtc dt:dt="string">2021-10-22T02:00:14Z</DateUtc></StartTime><FrequencyChanges><FrequencyChange><Frequency dt:dt="r8">10000000</Frequency><Timestamp dt:dt="r8">17671510370172</Timestamp><Current dt:…	59.965	1.0.0.21	1	2016978559	2.0.10.182	10-22-2021	2021-10-22 02:00:16	10:00:16	2.0.10.92	1	affpro	WordList	1	1	1	79	f	NULL	NULL	NULL	NULL	NULL	NULL	NULL	NULL	NULL	NULL	1	NULL	NULL	NULL	NULL	NULL	NULL	NULL	NULL	pra2	taskList1	科学的	NULL	NULL	NULL	NULL	NULL	NULL	NULL
大创sc-iat	2	2	<?xml version="1.0"?>\n<Clock xmlns:dt="urn:schemas-microsoft-com:datatypes"><Description dt:dt="string">E-Prime Primary Realtime Clock</Description><StartTime><Timestamp dt:dt="int">0</Timestamp><DateUtc dt:dt="string">2021-10-22T02:00:14Z</DateUtc></StartTime><FrequencyChanges><FrequencyChange><Frequency dt:dt="r8">10000000</Frequency><Timestamp dt:dt="r8">17671510370172</Timestamp><Current dt:…	59.965	1.0.0.21	1	2016978559	2.0.10.182	10-22-2021	2021-10-22 02:00:16	10:00:16	2.0.10.92	1	affpro	WordList	1	1	1	80	j	NULL	NULL	NULL	NULL	NULL	NULL	4	NULL	NULL	NULL	NULL	NULL	NULL	NULL	NULL	NULL	NULL	NULL	NULL	pra2	taskList1	有争议的	NULL	NULL	NULL	NULL	NULL	NULL	NULL
大创sc-iat	2	2	<?xml version="1.0"?>\n<Clock xmlns:dt="urn:schemas-microsoft-com:datatypes"><Description dt:dt="string">E-Prime Primary Realtime Clock</Description><StartTime><Timestamp dt:dt="int">0</Timestamp><DateUtc dt:dt="string">2021-10-22T02:00:14Z</DateUtc></StartTime><FrequencyChanges><FrequencyChange><Frequency dt:dt="r8">10000000</Frequency><Timestamp dt:dt="r8">17671510370172</Timestamp><Current dt:…	59.965	1.0.0.21	1	2016978559	2.0.10.182	10-22-2021	2021-10-22 02:00:16	10:00:16	2.0.10.92	1	affpro	WordList	1	1	1	81	f	NULL	NULL	3	NULL	NULL	NULL	NULL	NULL	NULL	NULL	NULL	NULL	NULL	NULL	NULL	NULL	NULL	NULL	NULL	pra2	taskList1	转基因大豆	NULL	NULL	NULL	NULL	NULL	NULL	NULL
大创sc-iat	2	2	<?xml version="1.0"?>\n<Clock xmlns:dt="urn:schemas-microsoft-com:datatypes"><Description dt:dt="string">E-Prime Primary Realtime Clock</Description><StartTime><Timestamp dt:dt="int">0</Timestamp><DateUtc dt:dt="string">2021-10-22T02:00:14Z</DateUtc></StartTime><FrequencyChanges><FrequencyChange><Frequency dt:dt="r8">10000000</Frequency><Timestamp dt:dt="r8">17671510370172</Timestamp><Current dt:…	59.965	1.0.0.21	1	2016978559	2.0.10.182	10-22-2021	2021-10-22 02:00:16	10:00:16	2.0.10.92	1	affpro	WordList	1	1	1	82	f	NULL	NULL	NULL	NULL	NULL	NULL	NULL	NULL	NULL	NULL	4	NULL	NULL	NULL	NULL	NULL	NULL	NULL	NULL	pra2	taskList1	创新的	NULL	NULL	NULL	NULL	NULL	NULL	NULL
大创sc-iat	2	2	<?xml version="1.0"?>\n<Clock xmlns:dt="urn:schemas-microsoft-com:datatypes"><Description dt:dt="string">E-Prime Primary Realtime Clock</Description><StartTime><Timestamp dt:dt="int">0</Timestamp><DateUtc dt:dt="string">2021-10-22T02:00:14Z</DateUtc></StartTime><FrequencyChanges><FrequencyChange><Frequency dt:dt="r8">10000000</Frequency><Timestamp dt:dt="r8">17671510370172</Timestamp><Current dt:…	59.965	1.0.0.21	1	2016978559	2.0.10.182	10-22-2021	2021-10-22 02:00:16	10:00:16	2.0.10.92	1	affpro	WordList	1	1	1	83	j	NULL	NULL	NULL	NULL	NULL	NULL	2	NULL	NULL	NULL	NULL	NULL	NULL	NULL	NULL	NULL	NULL	NULL	NULL	pra2	taskList1	高风险的	NULL	NULL	NULL	NULL	NULL	NULL	NULL
大创sc-iat	2	2	<?xml version="1.0"?>\n<Clock xmlns:dt="urn:schemas-microsoft-com:datatypes"><Description dt:dt="string">E-Prime Primary Realtime Clock</Description><StartTime><Timestamp dt:dt="int">0</Timestamp><DateUtc dt:dt="string">2021-10-22T02:00:14Z</DateUtc></StartTime><FrequencyChanges><FrequencyChange><Frequency dt:dt="r8">10000000</Frequency><Timestamp dt:dt="r8">17671510370172</Timestamp><Current dt:…	59.965	1.0.0.21	1	2016978559	2.0.10.182	10-22-2021	2021-10-22 02:00:16	10:00:16	2.0.10.92	1	affpro	WordList	1	1	1	84	j	NULL	NULL	NULL	NULL	NULL	NULL	3	NULL	NULL	NULL	NULL	NULL	NULL	NULL	NULL	NULL	NULL	NULL	NULL	pra2	taskList1	非天然的	NULL	NULL	NULL	NULL	NULL	NULL	NULL
大创sc-iat	2	2	<?xml version="1.0"?>\n<Clock xmlns:dt="urn:schemas-microsoft-com:datatypes"><Description dt:dt="string">E-Prime Primary Realtime Clock</Description><StartTime><Timestamp dt:dt="int">0</Timestamp><DateUtc dt:dt="string">2021-10-22T02:00:14Z</DateUtc></StartTime><FrequencyChanges><FrequencyChange><Frequency dt:dt="r8">10000000</Frequency><Timestamp dt:dt="r8">17671510370172</Timestamp><Current dt:…	59.965	1.0.0.21	1	2016978559	2.0.10.182	10-22-2021	2021-10-22 02:00:16	10:00:16	2.0.10.92	1	affpro	WordList	1	1	1	85	f	NULL	NULL	NULL	NULL	NULL	NULL	NULL	NULL	NULL	NULL	3	NULL	NULL	NULL	NULL	NULL	NULL	NULL	NULL	pra2	taskList1	高科技的	NULL	NULL	NULL	NULL	NULL	NULL	NULL
大创sc-iat	2	2	<?xml version="1.0"?>\n<Clock xmlns:dt="urn:schemas-microsoft-com:datatypes"><Description dt:dt="string">E-Prime Primary Realtime Clock</Description><StartTime><Timestamp dt:dt="int">0</Timestamp><DateUtc dt:dt="string">2021-10-22T02:00:14Z</DateUtc></StartTime><FrequencyChanges><FrequencyChange><Frequency dt:dt="r8">10000000</Frequency><Timestamp dt:dt="r8">17671510370172</Timestamp><Current dt:…	59.965	1.0.0.21	1	2016978559	2.0.10.182	10-22-2021	2021-10-22 02:00:16	10:00:16	2.0.10.92	1	affpro	WordList	1	1	1	86	j	NULL	NULL	NULL	NULL	NULL	NULL	1	NULL	NULL	NULL	NULL	NULL	NULL	NULL	NULL	NULL	NULL	NULL	NULL	pra2	taskList1	不成熟的	NULL	NULL	NULL	NULL	NULL	NULL	NULL
大创sc-iat	2	2	<?xml version="1.0"?>\n<Clock xmlns:dt="urn:schemas-microsoft-com:datatypes"><Description dt:dt="string">E-Prime Primary Realtime Clock</Description><StartTime><Timestamp dt:dt="int">0</Timestamp><DateUtc dt:dt="string">2021-10-22T02:00:14Z</DateUtc></StartTime><FrequencyChanges><FrequencyChange><Frequency dt:dt="r8">10000000</Frequency><Timestamp dt:dt="r8">17671510370172</Timestamp><Current dt:…	59.965	1.0.0.21	1	2016978559	2.0.10.182	10-22-2021	2021-10-22 02:00:16	10:00:16	2.0.10.92	1	affpro	WordList	1	1	1	87	j	NULL	NULL	NULL	NULL	NULL	NULL	4	NULL	NULL	NULL	NULL	NULL	NULL	NULL	NULL	NULL	NULL	NULL	NULL	pra2	taskList1	有争议的	NULL	NULL	NULL	NULL	NULL	NULL	NULL
大创sc-iat	2	2	<?xml version="1.0"?>\n<Clock xmlns:dt="urn:schemas-microsoft-com:datatypes"><Description dt:dt="string">E-Prime Primary Realtime Clock</Description><StartTime><Timestamp dt:dt="int">0</Timestamp><DateUtc dt:dt="string">2021-10-22T02:00:14Z</DateUtc></StartTime><FrequencyChanges><FrequencyChange><Frequency dt:dt="r8">10000000</Frequency><Timestamp dt:dt="r8">17671510370172</Timestamp><Current dt:…	59.965	1.0.0.21	1	2016978559	2.0.10.182	10-22-2021	2021-10-22 02:00:16	10:00:16	2.0.10.92	1	affpro	WordList	1	1	1	88	f	NULL	NULL	1	NULL	NULL	NULL	NULL	NULL	NULL	NULL	NULL	NULL	NULL	NULL	NULL	NULL	NULL	NULL	NULL	pra2	taskList1	转基因食物	NULL	NULL	NULL	NULL	NULL	NULL	NULL
大创sc-iat	2	2	<?xml version="1.0"?>\n<Clock xmlns:dt="urn:schemas-microsoft-com:datatypes"><Description dt:dt="string">E-Prime Primary Realtime Clock</Description><StartTime><Timestamp dt:dt="int">0</Timestamp><DateUtc dt:dt="string">2021-10-22T02:00:14Z</DateUtc></StartTime><FrequencyChanges><FrequencyChange><Frequency dt:dt="r8">10000000</Frequency><Timestamp dt:dt="r8">17671510370172</Timestamp><Current dt:…	59.965	1.0.0.21	1	2016978559	2.0.10.182	10-22-2021	2021-10-22 02:00:16	10:00:16	2.0.10.92	1	affpro	WordList	1	1	1	89	j	NULL	NULL	NULL	NULL	NULL	NULL	1	NULL	NULL	NULL	NULL	NULL	NULL	NULL	NULL	NULL	NULL	NULL	NULL	pra2	taskList1	不成熟的	NULL	NULL	NULL	NULL	NULL	NULL	NULL
大创sc-iat	2	2	<?xml version="1.0"?>\n<Clock xmlns:dt="urn:schemas-microsoft-com:datatypes"><Description dt:dt="string">E-Prime Primary Realtime Clock</Description><StartTime><Timestamp dt:dt="int">0</Timestamp><DateUtc dt:dt="string">2021-10-22T02:00:14Z</DateUtc></StartTime><FrequencyChanges><FrequencyChange><Frequency dt:dt="r8">10000000</Frequency><Timestamp dt:dt="r8">17671510370172</Timestamp><Current dt:…	59.965	1.0.0.21	1	2016978559	2.0.10.182	10-22-2021	2021-10-22 02:00:16	10:00:16	2.0.10.92	1	affpro	WordList	1	1	1	90	f	NULL	NULL	NULL	NULL	NULL	NULL	NULL	NULL	NULL	NULL	1	NULL	NULL	NULL	NULL	NULL	NULL	NULL	NULL	pra2	taskList1	科学的	NULL	NULL	NULL	NULL	NULL	NULL	NULL
大创sc-iat	2	2	<?xml version="1.0"?>\n<Clock xmlns:dt="urn:schemas-microsoft-com:datatypes"><Description dt:dt="string">E-Prime Primary Realtime Clock</Description><StartTime><Timestamp dt:dt="int">0</Timestamp><DateUtc dt:dt="string">2021-10-22T02:00:14Z</DateUtc></StartTime><FrequencyChanges><FrequencyChange><Frequency dt:dt="r8">10000000</Frequency><Timestamp dt:dt="r8">17671510370172</Timestamp><Current dt:…	59.965	1.0.0.21	1	2016978559	2.0.10.182	10-22-2021	2021-10-22 02:00:16	10:00:16	2.0.10.92	1	affpro	WordList	1	1	1	91	j	NULL	NULL	NULL	NULL	NULL	NULL	3	NULL	NULL	NULL	NULL	NULL	NULL	NULL	NULL	NULL	NULL	NULL	NULL	pra2	taskList1	非天然的	NULL	NULL	NULL	NULL	NULL	NULL	NULL
大创sc-iat	2	2	<?xml version="1.0"?>\n<Clock xmlns:dt="urn:schemas-microsoft-com:datatypes"><Description dt:dt="string">E-Prime Primary Realtime Clock</Description><StartTime><Timestamp dt:dt="int">0</Timestamp><DateUtc dt:dt="string">2021-10-22T02:00:14Z</DateUtc></StartTime><FrequencyChanges><FrequencyChange><Frequency dt:dt="r8">10000000</Frequency><Timestamp dt:dt="r8">17671510370172</Timestamp><Current dt:…	59.965	1.0.0.21	1	2016978559	2.0.10.182	10-22-2021	2021-10-22 02:00:16	10:00:16	2.0.10.92	1	affpro	WordList	1	1	1	92	f	NULL	NULL	2	NULL	NULL	NULL	NULL	NULL	NULL	NULL	NULL	NULL	NULL	NULL	NULL	NULL	NULL	NULL	NULL	pra2	taskList1	抗虫害棉花	NULL	NULL	NULL	NULL	NULL	NULL	NULL
大创sc-iat	2	2	<?xml version="1.0"?>\n<Clock xmlns:dt="urn:schemas-microsoft-com:datatypes"><Description dt:dt="string">E-Prime Primary Realtime Clock</Description><StartTime><Timestamp dt:dt="int">0</Timestamp><DateUtc dt:dt="string">2021-10-22T02:00:14Z</DateUtc></StartTime><FrequencyChanges><FrequencyChange><Frequency dt:dt="r8">10000000</Frequency><Timestamp dt:dt="r8">17671510370172</Timestamp><Current dt:…	59.965	1.0.0.21	1	2016978559	2.0.10.182	10-22-2021	2021-10-22 02:00:16	10:00:16	2.0.10.92	1	affpro	WordList	1	1	1	93	j	NULL	NULL	NULL	NULL	NULL	NULL	4	NULL	NULL	NULL	NULL	NULL	NULL	NULL	NULL	NULL	NULL	NULL	NULL	pra2	taskList1	有争议的	NULL	NULL	NULL	NULL	NULL	NULL	NULL
大创sc-iat	2	2	<?xml version="1.0"?>\n<Clock xmlns:dt="urn:schemas-microsoft-com:datatypes"><Description dt:dt="string">E-Prime Primary Realtime Clock</Description><StartTime><Timestamp dt:dt="int">0</Timestamp><DateUtc dt:dt="string">2021-10-22T02:00:14Z</DateUtc></StartTime><FrequencyChanges><FrequencyChange><Frequency dt:dt="r8">10000000</Frequency><Timestamp dt:dt="r8">17671510370172</Timestamp><Current dt:…	59.965	1.0.0.21	1	2016978559	2.0.10.182	10-22-2021	2021-10-22 02:00:16	10:00:16	2.0.10.92	1	affpro	WordList	1	1	1	94	f	NULL	NULL	NULL	NULL	NULL	NULL	NULL	NULL	NULL	NULL	4	NULL	NULL	NULL	NULL	NULL	NULL	NULL	NULL	pra2	taskList1	创新的	NULL	NULL	NULL	NULL	NULL	NULL	NULL
大创sc-iat	2	2	<?xml version="1.0"?>\n<Clock xmlns:dt="urn:schemas-microsoft-com:datatypes"><Description dt:dt="string">E-Prime Primary Realtime Clock</Description><StartTime><Timestamp dt:dt="int">0</Timestamp><DateUtc dt:dt="string">2021-10-22T02:00:14Z</DateUtc></StartTime><FrequencyChanges><FrequencyChange><Frequency dt:dt="r8">10000000</Frequency><Timestamp dt:dt="r8">17671510370172</Timestamp><Current dt:…	59.965	1.0.0.21	1	2016978559	2.0.10.182	10-22-2021	2021-10-22 02:00:16	10:00:16	2.0.10.92	1	affpro	WordList	1	1	1	95	f	NULL	NULL	4	NULL	NULL	NULL	NULL	NULL	NULL	NULL	NULL	NULL	NULL	NULL	NULL	NULL	NULL	NULL	NULL	pra2	taskList1	动物转基因	NULL	NULL	NULL	NULL	NULL	NULL	NULL
大创sc-iat	2	2	<?xml version="1.0"?>\n<Clock xmlns:dt="urn:schemas-microsoft-com:datatypes"><Description dt:dt="string">E-Prime Primary Realtime Clock</Description><StartTime><Timestamp dt:dt="int">0</Timestamp><DateUtc dt:dt="string">2021-10-22T02:00:14Z</DateUtc></StartTime><FrequencyChanges><FrequencyChange><Frequency dt:dt="r8">10000000</Frequency><Timestamp dt:dt="r8">17671510370172</Timestamp><Current dt:…	59.965	1.0.0.21	1	2016978559	2.0.10.182	10-22-2021	2021-10-22 02:00:16	10:00:16	2.0.10.92	1	affpro	WordList	1	1	1	96	j	NULL	NULL	NULL	NULL	NULL	NULL	2	NULL	NULL	NULL	NULL	NULL	NULL	NULL	NULL	NULL	NULL	NULL	NULL	pra2	taskList1	高风险的	NULL	NULL	NULL	NULL	NULL	NULL	NULL
大创sc-iat	2	2	<?xml version="1.0"?>\n<Clock xmlns:dt="urn:schemas-microsoft-com:datatypes"><Description dt:dt="string">E-Prime Primary Realtime Clock</Description><StartTime><Timestamp dt:dt="int">0</Timestamp><DateUtc dt:dt="string">2021-10-22T02:00:14Z</DateUtc></StartTime><FrequencyChanges><FrequencyChange><Frequency dt:dt="r8">10000000</Frequency><Timestamp dt:dt="r8">17671510370172</Timestamp><Current dt:…	59.965	1.0.0.21	1	2016978559	2.0.10.182	10-22-2021	2021-10-22 02:00:16	10:00:16	2.0.10.92	1	affpro	WordList	1	1	1	97	j	NULL	NULL	NULL	2	NULL	NULL	NULL	NULL	NULL	NULL	NULL	NULL	NULL	NULL	NULL	NULL	1	1	1	pra3	practiceList2	抗虫害棉花	NULL	NULL	NULL	NULL	NULL	NULL	NULL
大创sc-iat	2	2	<?xml version="1.0"?>\n<Clock xmlns:dt="urn:schemas-microsoft-com:datatypes"><Description dt:dt="string">E-Prime Primary Realtime Clock</Description><StartTime><Timestamp dt:dt="int">0</Timestamp><DateUtc dt:dt="string">2021-10-22T02:00:14Z</DateUtc></StartTime><FrequencyChanges><FrequencyChange><Frequency dt:dt="r8">10000000</Frequency><Timestamp dt:dt="r8">17671510370172</Timestamp><Current dt:…	59.965	1.0.0.21	1	2016978559	2.0.10.182	10-22-2021	2021-10-22 02:00:16	10:00:16	2.0.10.92	1	affpro	WordList	1	1	1	98	f	NULL	NULL	NULL	NULL	NULL	NULL	NULL	NULL	NULL	NULL	NULL	1	NULL	NULL	NULL	NULL	2	1	2	pra3	practiceList2	科学的	NULL	NULL	NULL	NULL	NULL	NULL	NULL
大创sc-iat	2	2	<?xml version="1.0"?>\n<Clock xmlns:dt="urn:schemas-microsoft-com:datatypes"><Description dt:dt="string">E-Prime Primary Realtime Clock</Description><StartTime><Timestamp dt:dt="int">0</Timestamp><DateUtc dt:dt="string">2021-10-22T02:00:14Z</DateUtc></StartTime><FrequencyChanges><FrequencyChange><Frequency dt:dt="r8">10000000</Frequency><Timestamp dt:dt="r8">17671510370172</Timestamp><Current dt:…	59.965	1.0.0.21	1	2016978559	2.0.10.182	10-22-2021	2021-10-22 02:00:16	10:00:16	2.0.10.92	1	affpro	WordList	1	1	1	99	j	NULL	NULL	NULL	NULL	NULL	NULL	NULL	2	NULL	NULL	NULL	NULL	NULL	NULL	NULL	NULL	3	1	3	pra3	practiceList2	高风险的	NULL	NULL	NULL	NULL	NULL	NULL	NULL
大创sc-iat	2	2	<?xml version="1.0"?>\n<Clock xmlns:dt="urn:schemas-microsoft-com:datatypes"><Description dt:dt="string">E-Prime Primary Realtime Clock</Description><StartTime><Timestamp dt:dt="int">0</Timestamp><DateUtc dt:dt="string">2021-10-22T02:00:14Z</DateUtc></StartTime><FrequencyChanges><FrequencyChange><Frequency dt:dt="r8">10000000</Frequency><Timestamp dt:dt="r8">17671510370172</Timestamp><Current dt:…	59.965	1.0.0.21	1	2016978559	2.0.10.182	10-22-2021	2021-10-22 02:00:16	10:00:16	2.0.10.92	1	affpro	WordList	1	1	1	100	f	NULL	NULL	NULL	NULL	NULL	NULL	NULL	NULL	NULL	NULL	NULL	2	NULL	NULL	NULL	NULL	2	1	4	pra3	practiceList2	高产的	NULL	NULL	NULL	NULL	NULL	NULL	NULL
大创sc-iat	2	2	<?xml version="1.0"?>\n<Clock xmlns:dt="urn:schemas-microsoft-com:datatypes"><Description dt:dt="string">E-Prime Primary Realtime Clock</Description><StartTime><Timestamp dt:dt="int">0</Timestamp><DateUtc dt:dt="string">2021-10-22T02:00:14Z</DateUtc></StartTime><FrequencyChanges><FrequencyChange><Frequency dt:dt="r8">10000000</Frequency><Timestamp dt:dt="r8">17671510370172</Timestamp><Current dt:…	59.965	1.0.0.21	1	2016978559	2.0.10.182	10-22-2021	2021-10-22 02:00:16	10:00:16	2.0.10.92	1	affpro	WordList	1	1	1	101	j	NULL	NULL	NULL	NULL	NULL	NULL	NULL	1	NULL	NULL	NULL	NULL	NULL	NULL	NULL	NULL	3	2	5	pra3	practiceList2	不成熟的	NULL	NULL	NULL	NULL	NULL	NULL	NULL
大创sc-iat	2	2	<?xml version="1.0"?>\n<Clock xmlns:dt="urn:schemas-microsoft-com:datatypes"><Description dt:dt="string">E-Prime Primary Realtime Clock</Description><StartTime><Timestamp dt:dt="int">0</Timestamp><DateUtc dt:dt="string">2021-10-22T02:00:14Z</DateUtc></StartTime><FrequencyChanges><FrequencyChange><Frequency dt:dt="r8">10000000</Frequency><Timestamp dt:dt="r8">17671510370172</Timestamp><Current dt:…	59.965	1.0.0.21	1	2016978559	2.0.10.182	10-22-2021	2021-10-22 02:00:16	10:00:16	2.0.10.92	1	affpro	WordList	1	1	1	102	j	NULL	NULL	NULL	1	NULL	NULL	NULL	NULL	NULL	NULL	NULL	NULL	NULL	NULL	NULL	NULL	1	2	6	pra3	practiceList2	转基因食物	NULL	NULL	NULL	NULL	NULL	NULL	NULL
大创sc-iat	2	2	<?xml version="1.0"?>\n<Clock xmlns:dt="urn:schemas-microsoft-com:datatypes"><Description dt:dt="string">E-Prime Primary Realtime Clock</Description><StartTime><Timestamp dt:dt="int">0</Timestamp><DateUtc dt:dt="string">2021-10-22T02:00:14Z</DateUtc></StartTime><FrequencyChanges><FrequencyChange><Frequency dt:dt="r8">10000000</Frequency><Timestamp dt:dt="r8">17671510370172</Timestamp><Current dt:…	59.965	1.0.0.21	1	2016978559	2.0.10.182	10-22-2021	2021-10-22 02:00:16	10:00:16	2.0.10.92	1	affpro	WordList	1	1	1	103	f	NULL	NULL	NULL	NULL	NULL	NULL	NULL	NULL	NULL	NULL	NULL	3	NULL	NULL	NULL	NULL	2	2	7	pra3	practiceList2	高科技的	NULL	NULL	NULL	NULL	NULL	NULL	NULL
大创sc-iat	2	2	<?xml version="1.0"?>\n<Clock xmlns:dt="urn:schemas-microsoft-com:datatypes"><Description dt:dt="string">E-Prime Primary Realtime Clock</Description><StartTime><Timestamp dt:dt="int">0</Timestamp><DateUtc dt:dt="string">2021-10-22T02:00:14Z</DateUtc></StartTime><FrequencyChanges><FrequencyChange><Frequency dt:dt="r8">10000000</Frequency><Timestamp dt:dt="r8">17671510370172</Timestamp><Current dt:…	59.965	1.0.0.21	1	2016978559	2.0.10.182	10-22-2021	2021-10-22 02:00:16	10:00:16	2.0.10.92	1	affpro	WordList	1	1	1	104	f	NULL	NULL	NULL	NULL	NULL	NULL	NULL	NULL	NULL	NULL	NULL	4	NULL	NULL	NULL	NULL	2	2	8	pra3	practiceList2	创新的	NULL	NULL	NULL	NULL	NULL	NULL	NULL
大创sc-iat	2	2	<?xml version="1.0"?>\n<Clock xmlns:dt="urn:schemas-microsoft-com:datatypes"><Description dt:dt="string">E-Prime Primary Realtime Clock</Description><StartTime><Timestamp dt:dt="int">0</Timestamp><DateUtc dt:dt="string">2021-10-22T02:00:14Z</DateUtc></StartTime><FrequencyChanges><FrequencyChange><Frequency dt:dt="r8">10000000</Frequency><Timestamp dt:dt="r8">17671510370172</Timestamp><Current dt:…	59.965	1.0.0.21	1	2016978559	2.0.10.182	10-22-2021	2021-10-22 02:00:16	10:00:16	2.0.10.92	1	affpro	WordList	1	1	1	105	j	NULL	NULL	NULL	NULL	NULL	NULL	NULL	4	NULL	NULL	NULL	NULL	NULL	NULL	NULL	NULL	3	3	9	pra3	practiceList2	有争议的	NULL	NULL	NULL	NULL	NULL	NULL	NULL
大创sc-iat	2	2	<?xml version="1.0"?>\n<Clock xmlns:dt="urn:schemas-microsoft-com:datatypes"><Description dt:dt="string">E-Prime Primary Realtime Clock</Description><StartTime><Timestamp dt:dt="int">0</Timestamp><DateUtc dt:dt="string">2021-10-22T02:00:14Z</DateUtc></StartTime><FrequencyChanges><FrequencyChange><Frequency dt:dt="r8">10000000</Frequency><Timestamp dt:dt="r8">17671510370172</Timestamp><Current dt:…	59.965	1.0.0.21	1	2016978559	2.0.10.182	10-22-2021	2021-10-22 02:00:16	10:00:16	2.0.10.92	1	affpro	WordList	1	1	1	106	f	NULL	NULL	NULL	NULL	NULL	NULL	NULL	NULL	NULL	NULL	NULL	1	NULL	NULL	NULL	NULL	2	3	10	pra3	practiceList2	科学的	NULL	NULL	NULL	NULL	NULL	NULL	NULL
大创sc-iat	2	2	<?xml version="1.0"?>\n<Clock xmlns:dt="urn:schemas-microsoft-com:datatypes"><Description dt:dt="string">E-Prime Primary Realtime Clock</Description><StartTime><Timestamp dt:dt="int">0</Timestamp><DateUtc dt:dt="string">2021-10-22T02:00:14Z</DateUtc></StartTime><FrequencyChanges><FrequencyChange><Frequency dt:dt="r8">10000000</Frequency><Timestamp dt:dt="r8">17671510370172</Timestamp><Current dt:…	59.965	1.0.0.21	1	2016978559	2.0.10.182	10-22-2021	2021-10-22 02:00:16	10:00:16	2.0.10.92	1	affpro	WordList	1	1	1	107	f	NULL	NULL	NULL	NULL	NULL	NULL	NULL	NULL	NULL	NULL	NULL	3	NULL	NULL	NULL	NULL	2	3	11	pra3	practiceList2	高科技的	NULL	NULL	NULL	NULL	NULL	NULL	NULL
大创sc-iat	2	2	<?xml version="1.0"?>\n<Clock xmlns:dt="urn:schemas-microsoft-com:datatypes"><Description dt:dt="string">E-Prime Primary Realtime Clock</Description><StartTime><Timestamp dt:dt="int">0</Timestamp><DateUtc dt:dt="string">2021-10-22T02:00:14Z</DateUtc></StartTime><FrequencyChanges><FrequencyChange><Frequency dt:dt="r8">10000000</Frequency><Timestamp dt:dt="r8">17671510370172</Timestamp><Current dt:…	59.965	1.0.0.21	1	2016978559	2.0.10.182	10-22-2021	2021-10-22 02:00:16	10:00:16	2.0.10.92	1	affpro	WordList	1	1	1	108	j	NULL	NULL	NULL	3	NULL	NULL	NULL	NULL	NULL	NULL	NULL	NULL	NULL	NULL	NULL	NULL	1	3	12	pra3	practiceList2	转基因大豆	NULL	NULL	NULL	NULL	NULL	NULL	NULL
大创sc-iat	2	2	<?xml version="1.0"?>\n<Clock xmlns:dt="urn:schemas-microsoft-com:datatypes"><Description dt:dt="string">E-Prime Primary Realtime Clock</Description><StartTime><Timestamp dt:dt="int">0</Timestamp><DateUtc dt:dt="string">2021-10-22T02:00:14Z</DateUtc></StartTime><FrequencyChanges><FrequencyChange><Frequency dt:dt="r8">10000000</Frequency><Timestamp dt:dt="r8">17671510370172</Timestamp><Current dt:…	59.965	1.0.0.21	1	2016978559	2.0.10.182	10-22-2021	2021-10-22 02:00:16	10:00:16	2.0.10.92	1	affpro	WordList	1	1	1	109	j	NULL	NULL	NULL	NULL	NULL	NULL	NULL	3	NULL	NULL	NULL	NULL	NULL	NULL	NULL	NULL	3	4	13	pra3	practiceList2	非天然的	NULL	NULL	NULL	NULL	NULL	NULL	NULL
大创sc-iat	2	2	<?xml version="1.0"?>\n<Clock xmlns:dt="urn:schemas-microsoft-com:datatypes"><Description dt:dt="string">E-Prime Primary Realtime Clock</Description><StartTime><Timestamp dt:dt="int">0</Timestamp><DateUtc dt:dt="string">2021-10-22T02:00:14Z</DateUtc></StartTime><FrequencyChanges><FrequencyChange><Frequency dt:dt="r8">10000000</Frequency><Timestamp dt:dt="r8">17671510370172</Timestamp><Current dt:…	59.965	1.0.0.21	1	2016978559	2.0.10.182	10-22-2021	2021-10-22 02:00:16	10:00:16	2.0.10.92	1	affpro	WordList	1	1	1	110	j	NULL	NULL	NULL	4	NULL	NULL	NULL	NULL	NULL	NULL	NULL	NULL	NULL	NULL	NULL	NULL	1	4	14	pra3	practiceList2	动物转基因	NULL	NULL	NULL	NULL	NULL	NULL	NULL
大创sc-iat	2	2	<?xml version="1.0"?>\n<Clock xmlns:dt="urn:schemas-microsoft-com:datatypes"><Description dt:dt="string">E-Prime Primary Realtime Clock</Description><StartTime><Timestamp dt:dt="int">0</Timestamp><DateUtc dt:dt="string">2021-10-22T02:00:14Z</DateUtc></StartTime><FrequencyChanges><FrequencyChange><Frequency dt:dt="r8">10000000</Frequency><Timestamp dt:dt="r8">17671510370172</Timestamp><Current dt:…	59.965	1.0.0.21	1	2016978559	2.0.10.182	10-22-2021	2021-10-22 02:00:16	10:00:16	2.0.10.92	1	affpro	WordList	1	1	1	111	f	NULL	NULL	NULL	NULL	NULL	NULL	NULL	NULL	NULL	NULL	NULL	2	NULL	NULL	NULL	NULL	2	4	15	pra3	practiceList2	高产的	NULL	NULL	NULL	NULL	NULL	NULL	NULL
大创sc-iat	2	2	<?xml version="1.0"?>\n<Clock xmlns:dt="urn:schemas-microsoft-com:datatypes"><Description dt:dt="string">E-Prime Primary Realtime Clock</Description><StartTime><Timestamp dt:dt="int">0</Timestamp><DateUtc dt:dt="string">2021-10-22T02:00:14Z</DateUtc></StartTime><FrequencyChanges><FrequencyChange><Frequency dt:dt="r8">10000000</Frequency><Timestamp dt:dt="r8">17671510370172</Timestamp><Current dt:…	59.965	1.0.0.21	1	2016978559	2.0.10.182	10-22-2021	2021-10-22 02:00:16	10:00:16	2.0.10.92	1	affpro	WordList	1	1	1	112	f	NULL	NULL	NULL	NULL	NULL	NULL	NULL	NULL	NULL	NULL	NULL	4	NULL	NULL	NULL	NULL	2	4	16	pra3	practiceList2	创新的	NULL	NULL	NULL	NULL	NULL	NULL	NULL
大创sc-iat	2	2	<?xml version="1.0"?>\n<Clock xmlns:dt="urn:schemas-microsoft-com:datatypes"><Description dt:dt="string">E-Prime Primary Realtime Clock</Description><StartTime><Timestamp dt:dt="int">0</Timestamp><DateUtc dt:dt="string">2021-10-22T02:00:14Z</DateUtc></StartTime><FrequencyChanges><FrequencyChange><Frequency dt:dt="r8">10000000</Frequency><Timestamp dt:dt="r8">17671510370172</Timestamp><Current dt:…	59.965	1.0.0.21	1	2016978559	2.0.10.182	10-22-2021	2021-10-22 02:00:16	10:00:16	2.0.10.92	1	affpro	WordList	1	1	1	113	j	NULL	NULL	NULL	NULL	NULL	NULL	NULL	1	NULL	NULL	NULL	NULL	NULL	NULL	NULL	NULL	3	5	17	pra3	practiceList2	不成熟的	NULL	NULL	NULL	NULL	NULL	NULL	NULL
大创sc-iat	2	2	<?xml version="1.0"?>\n<Clock xmlns:dt="urn:schemas-microsoft-com:datatypes"><Description dt:dt="string">E-Prime Primary Realtime Clock</Description><StartTime><Timestamp dt:dt="int">0</Timestamp><DateUtc dt:dt="string">2021-10-22T02:00:14Z</DateUtc></StartTime><FrequencyChanges><FrequencyChange><Frequency dt:dt="r8">10000000</Frequency><Timestamp dt:dt="r8">17671510370172</Timestamp><Current dt:…	59.965	1.0.0.21	1	2016978559	2.0.10.182	10-22-2021	2021-10-22 02:00:16	10:00:16	2.0.10.92	1	affpro	WordList	1	1	1	114	j	NULL	NULL	NULL	3	NULL	NULL	NULL	NULL	NULL	NULL	NULL	NULL	NULL	NULL	NULL	NULL	1	5	18	pra3	practiceList2	转基因大豆	NULL	NULL	NULL	NULL	NULL	NULL	NULL
大创sc-iat	2	2	<?xml version="1.0"?>\n<Clock xmlns:dt="urn:schemas-microsoft-com:datatypes"><Description dt:dt="string">E-Prime Primary Realtime Clock</Description><StartTime><Timestamp dt:dt="int">0</Timestamp><DateUtc dt:dt="string">2021-10-22T02:00:14Z</DateUtc></StartTime><FrequencyChanges><FrequencyChange><Frequency dt:dt="r8">10000000</Frequency><Timestamp dt:dt="r8">17671510370172</Timestamp><Current dt:…	59.965	1.0.0.21	1	2016978559	2.0.10.182	10-22-2021	2021-10-22 02:00:16	10:00:16	2.0.10.92	1	affpro	WordList	1	1	1	115	f	NULL	NULL	NULL	NULL	NULL	NULL	NULL	NULL	NULL	NULL	NULL	3	NULL	NULL	NULL	NULL	2	5	19	pra3	practiceList2	高科技的	NULL	NULL	NULL	NULL	NULL	NULL	NULL
大创sc-iat	2	2	<?xml version="1.0"?>\n<Clock xmlns:dt="urn:schemas-microsoft-com:datatypes"><Description dt:dt="string">E-Prime Primary Realtime Clock</Description><StartTime><Timestamp dt:dt="int">0</Timestamp><DateUtc dt:dt="string">2021-10-22T02:00:14Z</DateUtc></StartTime><FrequencyChanges><FrequencyChange><Frequency dt:dt="r8">10000000</Frequency><Timestamp dt:dt="r8">17671510370172</Timestamp><Current dt:…	59.965	1.0.0.21	1	2016978559	2.0.10.182	10-22-2021	2021-10-22 02:00:16	10:00:16	2.0.10.92	1	affpro	WordList	1	1	1	116	f	NULL	NULL	NULL	NULL	NULL	NULL	NULL	NULL	NULL	NULL	NULL	1	NULL	NULL	NULL	NULL	2	5	20	pra3	practiceList2	科学的	NULL	NULL	NULL	NULL	NULL	NULL	NULL
大创sc-iat	2	2	<?xml version="1.0"?>\n<Clock xmlns:dt="urn:schemas-microsoft-com:datatypes"><Description dt:dt="string">E-Prime Primary Realtime Clock</Description><StartTime><Timestamp dt:dt="int">0</Timestamp><DateUtc dt:dt="string">2021-10-22T02:00:14Z</DateUtc></StartTime><FrequencyChanges><FrequencyChange><Frequency dt:dt="r8">10000000</Frequency><Timestamp dt:dt="r8">17671510370172</Timestamp><Current dt:…	59.965	1.0.0.21	1	2016978559	2.0.10.182	10-22-2021	2021-10-22 02:00:16	10:00:16	2.0.10.92	1	affpro	WordList	1	1	1	117	j	NULL	NULL	NULL	1	NULL	NULL	NULL	NULL	NULL	NULL	NULL	NULL	NULL	NULL	NULL	NULL	1	6	21	pra3	practiceList2	转基因食物	NULL	NULL	NULL	NULL	NULL	NULL	NULL
大创sc-iat	2	2	<?xml version="1.0"?>\n<Clock xmlns:dt="urn:schemas-microsoft-com:datatypes"><Description dt:dt="string">E-Prime Primary Realtime Clock</Description><StartTime><Timestamp dt:dt="int">0</Timestamp><DateUtc dt:dt="string">2021-10-22T02:00:14Z</DateUtc></StartTime><FrequencyChanges><FrequencyChange><Frequency dt:dt="r8">10000000</Frequency><Timestamp dt:dt="r8">17671510370172</Timestamp><Current dt:…	59.965	1.0.0.21	1	2016978559	2.0.10.182	10-22-2021	2021-10-22 02:00:16	10:00:16	2.0.10.92	1	affpro	WordList	1	1	1	118	f	NULL	NULL	NULL	NULL	NULL	NULL	NULL	NULL	NULL	NULL	NULL	4	NULL	NULL	NULL	NULL	2	6	22	pra3	practiceList2	创新的	NULL	NULL	NULL	NULL	NULL	NULL	NULL
大创sc-iat	2	2	<?xml version="1.0"?>\n<Clock xmlns:dt="urn:schemas-microsoft-com:datatypes"><Description dt:dt="string">E-Prime Primary Realtime Clock</Description><StartTime><Timestamp dt:dt="int">0</Timestamp><DateUtc dt:dt="string">2021-10-22T02:00:14Z</DateUtc></StartTime><FrequencyChanges><FrequencyChange><Frequency dt:dt="r8">10000000</Frequency><Timestamp dt:dt="r8">17671510370172</Timestamp><Current dt:…	59.965	1.0.0.21	1	2016978559	2.0.10.182	10-22-2021	2021-10-22 02:00:16	10:00:16	2.0.10.92	1	affpro	WordList	1	1	1	119	j	NULL	NULL	NULL	NULL	NULL	NULL	NULL	3	NULL	NULL	NULL	NULL	NULL	NULL	NULL	NULL	3	6	23	pra3	practiceList2	非天然的	NULL	NULL	NULL	NULL	NULL	NULL	NULL
大创sc-iat	2	2	<?xml version="1.0"?>\n<Clock xmlns:dt="urn:schemas-microsoft-com:datatypes"><Description dt:dt="string">E-Prime Primary Realtime Clock</Description><StartTime><Timestamp dt:dt="int">0</Timestamp><DateUtc dt:dt="string">2021-10-22T02:00:14Z</DateUtc></StartTime><FrequencyChanges><FrequencyChange><Frequency dt:dt="r8">10000000</Frequency><Timestamp dt:dt="r8">17671510370172</Timestamp><Current dt:…	59.965	1.0.0.21	1	2016978559	2.0.10.182	10-22-2021	2021-10-22 02:00:16	10:00:16	2.0.10.92	1	affpro	WordList	1	1	1	120	f	NULL	NULL	NULL	NULL	NULL	NULL	NULL	NULL	NULL	NULL	NULL	2	NULL	NULL	NULL	NULL	2	6	24	pra3	practiceList2	高产的	NULL	NULL	NULL	NULL	NULL	NULL	NULL
大创sc-iat	2	2	<?xml version="1.0"?>\n<Clock xmlns:dt="urn:schemas-microsoft-com:datatypes"><Description dt:dt="string">E-Prime Primary Realtime Clock</Description><StartTime><Timestamp dt:dt="int">0</Timestamp><DateUtc dt:dt="string">2021-10-22T02:00:14Z</DateUtc></StartTime><FrequencyChanges><FrequencyChange><Frequency dt:dt="r8">10000000</Frequency><Timestamp dt:dt="r8">17671510370172</Timestamp><Current dt:…	59.965	1.0.0.21	1	2016978559	2.0.10.182	10-22-2021	2021-10-22 02:00:16	10:00:16	2.0.10.92	1	affpro	WordList	1	1	1	121	j	NULL	NULL	NULL	NULL	NULL	NULL	NULL	NULL	3	NULL	NULL	NULL	NULL	NULL	NULL	NULL	NULL	NULL	NULL	pra4	taskList2	非天然的	NULL	NULL	NULL	NULL	NULL	NULL	NULL
大创sc-iat	2	2	<?xml version="1.0"?>\n<Clock xmlns:dt="urn:schemas-microsoft-com:datatypes"><Description dt:dt="string">E-Prime Primary Realtime Clock</Description><StartTime><Timestamp dt:dt="int">0</Timestamp><DateUtc dt:dt="string">2021-10-22T02:00:14Z</DateUtc></StartTime><FrequencyChanges><FrequencyChange><Frequency dt:dt="r8">10000000</Frequency><Timestamp dt:dt="r8">17671510370172</Timestamp><Current dt:…	59.965	1.0.0.21	1	2016978559	2.0.10.182	10-22-2021	2021-10-22 02:00:16	10:00:16	2.0.10.92	1	affpro	WordList	1	1	1	122	j	NULL	NULL	NULL	NULL	3	NULL	NULL	NULL	NULL	NULL	NULL	NULL	NULL	NULL	NULL	NULL	NULL	NULL	NULL	pra4	taskList2	转基因大豆	NULL	NULL	NULL	NULL	NULL	NULL	NULL
大创sc-iat	2	2	<?xml version="1.0"?>\n<Clock xmlns:dt="urn:schemas-microsoft-com:datatypes"><Description dt:dt="string">E-Prime Primary Realtime Clock</Description><StartTime><Timestamp dt:dt="int">0</Timestamp><DateUtc dt:dt="string">2021-10-22T02:00:14Z</DateUtc></StartTime><FrequencyChanges><FrequencyChange><Frequency dt:dt="r8">10000000</Frequency><Timestamp dt:dt="r8">17671510370172</Timestamp><Current dt:…	59.965	1.0.0.21	1	2016978559	2.0.10.182	10-22-2021	2021-10-22 02:00:16	10:00:16	2.0.10.92	1	affpro	WordList	1	1	1	123	f	NULL	NULL	NULL	NULL	NULL	NULL	NULL	NULL	NULL	NULL	NULL	NULL	1	NULL	NULL	NULL	NULL	NULL	NULL	pra4	taskList2	科学的	NULL	NULL	NULL	NULL	NULL	NULL	NULL
大创sc-iat	2	2	<?xml version="1.0"?>\n<Clock xmlns:dt="urn:schemas-microsoft-com:datatypes"><Description dt:dt="string">E-Prime Primary Realtime Clock</Description><StartTime><Timestamp dt:dt="int">0</Timestamp><DateUtc dt:dt="string">2021-10-22T02:00:14Z</DateUtc></StartTime><FrequencyChanges><FrequencyChange><Frequency dt:dt="r8">10000000</Frequency><Timestamp dt:dt="r8">17671510370172</Timestamp><Current dt:…	59.965	1.0.0.21	1	2016978559	2.0.10.182	10-22-2021	2021-10-22 02:00:16	10:00:16	2.0.10.92	1	affpro	WordList	1	1	1	124	f	NULL	NULL	NULL	NULL	NULL	NULL	NULL	NULL	NULL	NULL	NULL	NULL	3	NULL	NULL	NULL	NULL	NULL	NULL	pra4	taskList2	高科技的	NULL	NULL	NULL	NULL	NULL	NULL	NULL
大创sc-iat	2	2	<?xml version="1.0"?>\n<Clock xmlns:dt="urn:schemas-microsoft-com:datatypes"><Description dt:dt="string">E-Prime Primary Realtime Clock</Description><StartTime><Timestamp dt:dt="int">0</Timestamp><DateUtc dt:dt="string">2021-10-22T02:00:14Z</DateUtc></StartTime><FrequencyChanges><FrequencyChange><Frequency dt:dt="r8">10000000</Frequency><Timestamp dt:dt="r8">17671510370172</Timestamp><Current dt:…	59.965	1.0.0.21	1	2016978559	2.0.10.182	10-22-2021	2021-10-22 02:00:16	10:00:16	2.0.10.92	1	affpro	WordList	1	1	1	125	j	NULL	NULL	NULL	NULL	NULL	NULL	NULL	NULL	1	NULL	NULL	NULL	NULL	NULL	NULL	NULL	NULL	NULL	NULL	pra4	taskList2	不成熟的	NULL	NULL	NULL	NULL	NULL	NULL	NULL
大创sc-iat	2	2	<?xml version="1.0"?>\n<Clock xmlns:dt="urn:schemas-microsoft-com:datatypes"><Description dt:dt="string">E-Prime Primary Realtime Clock</Description><StartTime><Timestamp dt:dt="int">0</Timestamp><DateUtc dt:dt="string">2021-10-22T02:00:14Z</DateUtc></StartTime><FrequencyChanges><FrequencyChange><Frequency dt:dt="r8">10000000</Frequency><Timestamp dt:dt="r8">17671510370172</Timestamp><Current dt:…	59.965	1.0.0.21	1	2016978559	2.0.10.182	10-22-2021	2021-10-22 02:00:16	10:00:16	2.0.10.92	1	affpro	WordList	1	1	1	126	j	NULL	NULL	NULL	NULL	4	NULL	NULL	NULL	NULL	NULL	NULL	NULL	NULL	NULL	NULL	NULL	NULL	NULL	NULL	pra4	taskList2	动物转基因	NULL	NULL	NULL	NULL	NULL	NULL	NULL
大创sc-iat	2	2	<?xml version="1.0"?>\n<Clock xmlns:dt="urn:schemas-microsoft-com:datatypes"><Description dt:dt="string">E-Prime Primary Realtime Clock</Description><StartTime><Timestamp dt:dt="int">0</Timestamp><DateUtc dt:dt="string">2021-10-22T02:00:14Z</DateUtc></StartTime><FrequencyChanges><FrequencyChange><Frequency dt:dt="r8">10000000</Frequency><Timestamp dt:dt="r8">17671510370172</Timestamp><Current dt:…	59.965	1.0.0.21	1	2016978559	2.0.10.182	10-22-2021	2021-10-22 02:00:16	10:00:16	2.0.10.92	1	affpro	WordList	1	1	1	127	f	NULL	NULL	NULL	NULL	NULL	NULL	NULL	NULL	NULL	NULL	NULL	NULL	4	NULL	NULL	NULL	NULL	NULL	NULL	pra4	taskList2	创新的	NULL	NULL	NULL	NULL	NULL	NULL	NULL
大创sc-iat	2	2	<?xml version="1.0"?>\n<Clock xmlns:dt="urn:schemas-microsoft-com:datatypes"><Description dt:dt="string">E-Prime Primary Realtime Clock</Description><StartTime><Timestamp dt:dt="int">0</Timestamp><DateUtc dt:dt="string">2021-10-22T02:00:14Z</DateUtc></StartTime><FrequencyChanges><FrequencyChange><Frequency dt:dt="r8">10000000</Frequency><Timestamp dt:dt="r8">17671510370172</Timestamp><Current dt:…	59.965	1.0.0.21	1	2016978559	2.0.10.182	10-22-2021	2021-10-22 02:00:16	10:00:16	2.0.10.92	1	affpro	WordList	1	1	1	128	f	NULL	NULL	NULL	NULL	NULL	NULL	NULL	NULL	NULL	NULL	NULL	NULL	2	NULL	NULL	NULL	NULL	NULL	NULL	pra4	taskList2	高产的	NULL	NULL	NULL	NULL	NULL	NULL	NULL
大创sc-iat	2	2	<?xml version="1.0"?>\n<Clock xmlns:dt="urn:schemas-microsoft-com:datatypes"><Description dt:dt="string">E-Prime Primary Realtime Clock</Description><StartTime><Timestamp dt:dt="int">0</Timestamp><DateUtc dt:dt="string">2021-10-22T02:00:14Z</DateUtc></StartTime><FrequencyChanges><FrequencyChange><Frequency dt:dt="r8">10000000</Frequency><Timestamp dt:dt="r8">17671510370172</Timestamp><Current dt:…	59.965	1.0.0.21	1	2016978559	2.0.10.182	10-22-2021	2021-10-22 02:00:16	10:00:16	2.0.10.92	1	affpro	WordList	1	1	1	129	j	NULL	NULL	NULL	NULL	NULL	NULL	NULL	NULL	4	NULL	NULL	NULL	NULL	NULL	NULL	NULL	NULL	NULL	NULL	pra4	taskList2	有争议的	NULL	NULL	NULL	NULL	NULL	NULL	NULL
大创sc-iat	2	2	<?xml version="1.0"?>\n<Clock xmlns:dt="urn:schemas-microsoft-com:datatypes"><Description dt:dt="string">E-Prime Primary Realtime Clock</Description><StartTime><Timestamp dt:dt="int">0</Timestamp><DateUtc dt:dt="string">2021-10-22T02:00:14Z</DateUtc></StartTime><FrequencyChanges><FrequencyChange><Frequency dt:dt="r8">10000000</Frequency><Timestamp dt:dt="r8">17671510370172</Timestamp><Current dt:…	59.965	1.0.0.21	1	2016978559	2.0.10.182	10-22-2021	2021-10-22 02:00:16	10:00:16	2.0.10.92	1	affpro	WordList	1	1	1	130	j	NULL	NULL	NULL	NULL	2	NULL	NULL	NULL	NULL	NULL	NULL	NULL	NULL	NULL	NULL	NULL	NULL	NULL	NULL	pra4	taskList2	抗虫害棉花	NULL	NULL	NULL	NULL	NULL	NULL	NULL
大创sc-iat	2	2	<?xml version="1.0"?>\n<Clock xmlns:dt="urn:schemas-microsoft-com:datatypes"><Description dt:dt="string">E-Prime Primary Realtime Clock</Description><StartTime><Timestamp dt:dt="int">0</Timestamp><DateUtc dt:dt="string">2021-10-22T02:00:14Z</DateUtc></StartTime><FrequencyChanges><FrequencyChange><Frequency dt:dt="r8">10000000</Frequency><Timestamp dt:dt="r8">17671510370172</Timestamp><Current dt:…	59.965	1.0.0.21	1	2016978559	2.0.10.182	10-22-2021	2021-10-22 02:00:16	10:00:16	2.0.10.92	1	affpro	WordList	1	1	1	131	f	NULL	NULL	NULL	NULL	NULL	NULL	NULL	NULL	NULL	NULL	NULL	NULL	1	NULL	NULL	NULL	NULL	NULL	NULL	pra4	taskList2	科学的	NULL	NULL	NULL	NULL	NULL	NULL	NULL
大创sc-iat	2	2	<?xml version="1.0"?>\n<Clock xmlns:dt="urn:schemas-microsoft-com:datatypes"><Description dt:dt="string">E-Prime Primary Realtime Clock</Description><StartTime><Timestamp dt:dt="int">0</Timestamp><DateUtc dt:dt="string">2021-10-22T02:00:14Z</DateUtc></StartTime><FrequencyChanges><FrequencyChange><Frequency dt:dt="r8">10000000</Frequency><Timestamp dt:dt="r8">17671510370172</Timestamp><Current dt:…	59.965	1.0.0.21	1	2016978559	2.0.10.182	10-22-2021	2021-10-22 02:00:16	10:00:16	2.0.10.92	1	affpro	WordList	1	1	1	132	f	NULL	NULL	NULL	NULL	NULL	NULL	NULL	NULL	NULL	NULL	NULL	NULL	4	NULL	NULL	NULL	NULL	NULL	NULL	pra4	taskList2	创新的	NULL	NULL	NULL	NULL	NULL	NULL	NULL
大创sc-iat	2	2	<?xml version="1.0"?>\n<Clock xmlns:dt="urn:schemas-microsoft-com:datatypes"><Description dt:dt="string">E-Prime Primary Realtime Clock</Description><StartTime><Timestamp dt:dt="int">0</Timestamp><DateUtc dt:dt="string">2021-10-22T02:00:14Z</DateUtc></StartTime><FrequencyChanges><FrequencyChange><Frequency dt:dt="r8">10000000</Frequency><Timestamp dt:dt="r8">17671510370172</Timestamp><Current dt:…	59.965	1.0.0.21	1	2016978559	2.0.10.182	10-22-2021	2021-10-22 02:00:16	10:00:16	2.0.10.92	1	affpro	WordList	1	1	1	133	j	NULL	NULL	NULL	NULL	NULL	NULL	NULL	NULL	2	NULL	NULL	NULL	NULL	NULL	NULL	NULL	NULL	NULL	NULL	pra4	taskList2	高风险的	NULL	NULL	NULL	NULL	NULL	NULL	NULL
大创sc-iat	2	2	<?xml version="1.0"?>\n<Clock xmlns:dt="urn:schemas-microsoft-com:datatypes"><Description dt:dt="string">E-Prime Primary Realtime Clock</Description><StartTime><Timestamp dt:dt="int">0</Timestamp><DateUtc dt:dt="string">2021-10-22T02:00:14Z</DateUtc></StartTime><FrequencyChanges><FrequencyChange><Frequency dt:dt="r8">10000000</Frequency><Timestamp dt:dt="r8">17671510370172</Timestamp><Current dt:…	59.965	1.0.0.21	1	2016978559	2.0.10.182	10-22-2021	2021-10-22 02:00:16	10:00:16	2.0.10.92	1	affpro	WordList	1	1	1	134	j	NULL	NULL	NULL	NULL	1	NULL	NULL	NULL	NULL	NULL	NULL	NULL	NULL	NULL	NULL	NULL	NULL	NULL	NULL	pra4	taskList2	转基因食物	NULL	NULL	NULL	NULL	NULL	NULL	NULL
大创sc-iat	2	2	<?xml version="1.0"?>\n<Clock xmlns:dt="urn:schemas-microsoft-com:datatypes"><Description dt:dt="string">E-Prime Primary Realtime Clock</Description><StartTime><Timestamp dt:dt="int">0</Timestamp><DateUtc dt:dt="string">2021-10-22T02:00:14Z</DateUtc></StartTime><FrequencyChanges><FrequencyChange><Frequency dt:dt="r8">10000000</Frequency><Timestamp dt:dt="r8">17671510370172</Timestamp><Current dt:…	59.965	1.0.0.21	1	2016978559	2.0.10.182	10-22-2021	2021-10-22 02:00:16	10:00:16	2.0.10.92	1	affpro	WordList	1	1	1	135	f	NULL	NULL	NULL	NULL	NULL	NULL	NULL	NULL	NULL	NULL	NULL	NULL	3	NULL	NULL	NULL	NULL	NULL	NULL	pra4	taskList2	高科技的	NULL	NULL	NULL	NULL	NULL	NULL	NULL
大创sc-iat	2	2	<?xml version="1.0"?>\n<Clock xmlns:dt="urn:schemas-microsoft-com:datatypes"><Description dt:dt="string">E-Prime Primary Realtime Clock</Description><StartTime><Timestamp dt:dt="int">0</Timestamp><DateUtc dt:dt="string">2021-10-22T02:00:14Z</DateUtc></StartTime><FrequencyChanges><FrequencyChange><Frequency dt:dt="r8">10000000</Frequency><Timestamp dt:dt="r8">17671510370172</Timestamp><Current dt:…	59.965	1.0.0.21	1	2016978559	2.0.10.182	10-22-2021	2021-10-22 02:00:16	10:00:16	2.0.10.92	1	affpro	WordList	1	1	1	136	f	NULL	NULL	NULL	NULL	NULL	NULL	NULL	NULL	NULL	NULL	NULL	NULL	2	NULL	NULL	NULL	NULL	NULL	NULL	pra4	taskList2	高产的	NULL	NULL	NULL	NULL	NULL	NULL	NULL
大创sc-iat	2	2	<?xml version="1.0"?>\n<Clock xmlns:dt="urn:schemas-microsoft-com:datatypes"><Description dt:dt="string">E-Prime Primary Realtime Clock</Description><StartTime><Timestamp dt:dt="int">0</Timestamp><DateUtc dt:dt="string">2021-10-22T02:00:14Z</DateUtc></StartTime><FrequencyChanges><FrequencyChange><Frequency dt:dt="r8">10000000</Frequency><Timestamp dt:dt="r8">17671510370172</Timestamp><Current dt:…	59.965	1.0.0.21	1	2016978559	2.0.10.182	10-22-2021	2021-10-22 02:00:16	10:00:16	2.0.10.92	1	affpro	WordList	1	1	1	137	j	NULL	NULL	NULL	NULL	NULL	NULL	NULL	NULL	3	NULL	NULL	NULL	NULL	NULL	NULL	NULL	NULL	NULL	NULL	pra4	taskList2	非天然的	NULL	NULL	NULL	NULL	NULL	NULL	NULL
大创sc-iat	2	2	<?xml version="1.0"?>\n<Clock xmlns:dt="urn:schemas-microsoft-com:datatypes"><Description dt:dt="string">E-Prime Primary Realtime Clock</Description><StartTime><Timestamp dt:dt="int">0</Timestamp><DateUtc dt:dt="string">2021-10-22T02:00:14Z</DateUtc></StartTime><FrequencyChanges><FrequencyChange><Frequency dt:dt="r8">10000000</Frequency><Timestamp dt:dt="r8">17671510370172</Timestamp><Current dt:…	59.965	1.0.0.21	1	2016978559	2.0.10.182	10-22-2021	2021-10-22 02:00:16	10:00:16	2.0.10.92	1	affpro	WordList	1	1	1	138	j	NULL	NULL	NULL	NULL	2	NULL	NULL	NULL	NULL	NULL	NULL	NULL	NULL	NULL	NULL	NULL	NULL	NULL	NULL	pra4	taskList2	抗虫害棉花	NULL	NULL	NULL	NULL	NULL	NULL	NULL
大创sc-iat	2	2	<?xml version="1.0"?>\n<Clock xmlns:dt="urn:schemas-microsoft-com:datatypes"><Description dt:dt="string">E-Prime Primary Realtime Clock</Description><StartTime><Timestamp dt:dt="int">0</Timestamp><DateUtc dt:dt="string">2021-10-22T02:00:14Z</DateUtc></StartTime><FrequencyChanges><FrequencyChange><Frequency dt:dt="r8">10000000</Frequency><Timestamp dt:dt="r8">17671510370172</Timestamp><Current dt:…	59.965	1.0.0.21	1	2016978559	2.0.10.182	10-22-2021	2021-10-22 02:00:16	10:00:16	2.0.10.92	1	affpro	WordList	1	1	1	139	f	NULL	NULL	NULL	NULL	NULL	NULL	NULL	NULL	NULL	NULL	NULL	NULL	1	NULL	NULL	NULL	NULL	NULL	NULL	pra4	taskList2	科学的	NULL	NULL	NULL	NULL	NULL	NULL	NULL
大创sc-iat	2	2	<?xml version="1.0"?>\n<Clock xmlns:dt="urn:schemas-microsoft-com:datatypes"><Description dt:dt="string">E-Prime Primary Realtime Clock</Description><StartTime><Timestamp dt:dt="int">0</Timestamp><DateUtc dt:dt="string">2021-10-22T02:00:14Z</DateUtc></StartTime><FrequencyChanges><FrequencyChange><Frequency dt:dt="r8">10000000</Frequency><Timestamp dt:dt="r8">17671510370172</Timestamp><Current dt:…	59.965	1.0.0.21	1	2016978559	2.0.10.182	10-22-2021	2021-10-22 02:00:16	10:00:16	2.0.10.92	1	affpro	WordList	1	1	1	140	f	NULL	NULL	NULL	NULL	NULL	NULL	NULL	NULL	NULL	NULL	NULL	NULL	3	NULL	NULL	NULL	NULL	NULL	NULL	pra4	taskList2	高科技的	NULL	NULL	NULL	NULL	NULL	NULL	NULL
大创sc-iat	2	2	<?xml version="1.0"?>\n<Clock xmlns:dt="urn:schemas-microsoft-com:datatypes"><Description dt:dt="string">E-Prime Primary Realtime Clock</Description><StartTime><Timestamp dt:dt="int">0</Timestamp><DateUtc dt:dt="string">2021-10-22T02:00:14Z</DateUtc></StartTime><FrequencyChanges><FrequencyChange><Frequency dt:dt="r8">10000000</Frequency><Timestamp dt:dt="r8">17671510370172</Timestamp><Current dt:…	59.965	1.0.0.21	1	2016978559	2.0.10.182	10-22-2021	2021-10-22 02:00:16	10:00:16	2.0.10.92	1	affpro	WordList	1	1	1	141	j	NULL	NULL	NULL	NULL	NULL	NULL	NULL	NULL	2	NULL	NULL	NULL	NULL	NULL	NULL	NULL	NULL	NULL	NULL	pra4	taskList2	高风险的	NULL	NULL	NULL	NULL	NULL	NULL	NULL
大创sc-iat	2	2	<?xml version="1.0"?>\n<Clock xmlns:dt="urn:schemas-microsoft-com:datatypes"><Description dt:dt="string">E-Prime Primary Realtime Clock</Description><StartTime><Timestamp dt:dt="int">0</Timestamp><DateUtc dt:dt="string">2021-10-22T02:00:14Z</DateUtc></StartTime><FrequencyChanges><FrequencyChange><Frequency dt:dt="r8">10000000</Frequency><Timestamp dt:dt="r8">17671510370172</Timestamp><Current dt:…	59.965	1.0.0.21	1	2016978559	2.0.10.182	10-22-2021	2021-10-22 02:00:16	10:00:16	2.0.10.92	1	affpro	WordList	1	1	1	142	f	NULL	NULL	NULL	NULL	NULL	NULL	NULL	NULL	NULL	NULL	NULL	NULL	4	NULL	NULL	NULL	NULL	NULL	NULL	pra4	taskList2	创新的	NULL	NULL	NULL	NULL	NULL	NULL	NULL
大创sc-iat	2	2	<?xml version="1.0"?>\n<Clock xmlns:dt="urn:schemas-microsoft-com:datatypes"><Description dt:dt="string">E-Prime Primary Realtime Clock</Description><StartTime><Timestamp dt:dt="int">0</Timestamp><DateUtc dt:dt="string">2021-10-22T02:00:14Z</DateUtc></StartTime><FrequencyChanges><FrequencyChange><Frequency dt:dt="r8">10000000</Frequency><Timestamp dt:dt="r8">17671510370172</Timestamp><Current dt:…	59.965	1.0.0.21	1	2016978559	2.0.10.182	10-22-2021	2021-10-22 02:00:16	10:00:16	2.0.10.92	1	affpro	WordList	1	1	1	143	f	NULL	NULL	NULL	NULL	NULL	NULL	NULL	NULL	NULL	NULL	NULL	NULL	2	NULL	NULL	NULL	NULL	NULL	NULL	pra4	taskList2	高产的	NULL	NULL	NULL	NULL	NULL	NULL	NULL
大创sc-iat	2	2	<?xml version="1.0"?>\n<Clock xmlns:dt="urn:schemas-microsoft-com:datatypes"><Description dt:dt="string">E-Prime Primary Realtime Clock</Description><StartTime><Timestamp dt:dt="int">0</Timestamp><DateUtc dt:dt="string">2021-10-22T02:00:14Z</DateUtc></StartTime><FrequencyChanges><FrequencyChange><Frequency dt:dt="r8">10000000</Frequency><Timestamp dt:dt="r8">17671510370172</Timestamp><Current dt:…	59.965	1.0.0.21	1	2016978559	2.0.10.182	10-22-2021	2021-10-22 02:00:16	10:00:16	2.0.10.92	1	affpro	WordList	1	1	1	144	j	NULL	NULL	NULL	NULL	4	NULL	NULL	NULL	NULL	NULL	NULL	NULL	NULL	NULL	NULL	NULL	NULL	NULL	NULL	pra4	taskList2	动物转基因	NULL	NULL	NULL	NULL	NULL	NULL	NULL
大创sc-iat	2	2	<?xml version="1.0"?>\n<Clock xmlns:dt="urn:schemas-microsoft-com:datatypes"><Description dt:dt="string">E-Prime Primary Realtime Clock</Description><StartTime><Timestamp dt:dt="int">0</Timestamp><DateUtc dt:dt="string">2021-10-22T02:00:14Z</DateUtc></StartTime><FrequencyChanges><FrequencyChange><Frequency dt:dt="r8">10000000</Frequency><Timestamp dt:dt="r8">17671510370172</Timestamp><Current dt:…	59.965	1.0.0.21	1	2016978559	2.0.10.182	10-22-2021	2021-10-22 02:00:16	10:00:16	2.0.10.92	1	affpro	WordList	1	1	1	145	j	NULL	NULL	NULL	NULL	NULL	NULL	NULL	NULL	4	NULL	NULL	NULL	NULL	NULL	NULL	NULL	NULL	NULL	NULL	pra4	taskList2	有争议的	NULL	NULL	NULL	NULL	NULL	NULL	NULL
大创sc-iat	2	2	<?xml version="1.0"?>\n<Clock xmlns:dt="urn:schemas-microsoft-com:datatypes"><Description dt:dt="string">E-Prime Primary Realtime Clock</Description><StartTime><Timestamp dt:dt="int">0</Timestamp><DateUtc dt:dt="string">2021-10-22T02:00:14Z</DateUtc></StartTime><FrequencyChanges><FrequencyChange><Frequency dt:dt="r8">10000000</Frequency><Timestamp dt:dt="r8">17671510370172</Timestamp><Current dt:…	59.965	1.0.0.21	1	2016978559	2.0.10.182	10-22-2021	2021-10-22 02:00:16	10:00:16	2.0.10.92	1	affpro	WordList	1	1	1	146	f	NULL	NULL	NULL	NULL	NULL	NULL	NULL	NULL	NULL	NULL	NULL	NULL	3	NULL	NULL	NULL	NULL	NULL	NULL	pra4	taskList2	高科技的	NULL	NULL	NULL	NULL	NULL	NULL	NULL
大创sc-iat	2	2	<?xml version="1.0"?>\n<Clock xmlns:dt="urn:schemas-microsoft-com:datatypes"><Description dt:dt="string">E-Prime Primary Realtime Clock</Description><StartTime><Timestamp dt:dt="int">0</Timestamp><DateUtc dt:dt="string">2021-10-22T02:00:14Z</DateUtc></StartTime><FrequencyChanges><FrequencyChange><Frequency dt:dt="r8">10000000</Frequency><Timestamp dt:dt="r8">17671510370172</Timestamp><Current dt:…	59.965	1.0.0.21	1	2016978559	2.0.10.182	10-22-2021	2021-10-22 02:00:16	10:00:16	2.0.10.92	1	affpro	WordList	1	1	1	147	f	NULL	NULL	NULL	NULL	NULL	NULL	NULL	NULL	NULL	NULL	NULL	NULL	2	NULL	NULL	NULL	NULL	NULL	NULL	pra4	taskList2	高产的	NULL	NULL	NULL	NULL	NULL	NULL	NULL
大创sc-iat	2	2	<?xml version="1.0"?>\n<Clock xmlns:dt="urn:schemas-microsoft-com:datatypes"><Description dt:dt="string">E-Prime Primary Realtime Clock</Description><StartTime><Timestamp dt:dt="int">0</Timestamp><DateUtc dt:dt="string">2021-10-22T02:00:14Z</DateUtc></StartTime><FrequencyChanges><FrequencyChange><Frequency dt:dt="r8">10000000</Frequency><Timestamp dt:dt="r8">17671510370172</Timestamp><Current dt:…	59.965	1.0.0.21	1	2016978559	2.0.10.182	10-22-2021	2021-10-22 02:00:16	10:00:16	2.0.10.92	1	affpro	WordList	1	1	1	148	j	NULL	NULL	NULL	NULL	1	NULL	NULL	NULL	NULL	NULL	NULL	NULL	NULL	NULL	NULL	NULL	NULL	NULL	NULL	pra4	taskList2	转基因食物	NULL	NULL	NULL	NULL	NULL	NULL	NULL
大创sc-iat	2	2	<?xml version="1.0"?>\n<Clock xmlns:dt="urn:schemas-microsoft-com:datatypes"><Description dt:dt="string">E-Prime Primary Realtime Clock</Description><StartTime><Timestamp dt:dt="int">0</Timestamp><DateUtc dt:dt="string">2021-10-22T02:00:14Z</DateUtc></StartTime><FrequencyChanges><FrequencyChange><Frequency dt:dt="r8">10000000</Frequency><Timestamp dt:dt="r8">17671510370172</Timestamp><Current dt:…	59.965	1.0.0.21	1	2016978559	2.0.10.182	10-22-2021	2021-10-22 02:00:16	10:00:16	2.0.10.92	1	affpro	WordList	1	1	1	149	f	NULL	NULL	NULL	NULL	NULL	NULL	NULL	NULL	NULL	NULL	NULL	NULL	1	NULL	NULL	NULL	NULL	NULL	NULL	pra4	taskList2	科学的	NULL	NULL	NULL	NULL	NULL	NULL	NULL
大创sc-iat	2	2	<?xml version="1.0"?>\n<Clock xmlns:dt="urn:schemas-microsoft-com:datatypes"><Description dt:dt="string">E-Prime Primary Realtime Clock</Description><StartTime><Timestamp dt:dt="int">0</Timestamp><DateUtc dt:dt="string">2021-10-22T02:00:14Z</DateUtc></StartTime><FrequencyChanges><FrequencyChange><Frequency dt:dt="r8">10000000</Frequency><Timestamp dt:dt="r8">17671510370172</Timestamp><Current dt:…	59.965	1.0.0.21	1	2016978559	2.0.10.182	10-22-2021	2021-10-22 02:00:16	10:00:16	2.0.10.92	1	affpro	WordList	1	1	1	150	j	NULL	NULL	NULL	NULL	3	NULL	NULL	NULL	NULL	NULL	NULL	NULL	NULL	NULL	NULL	NULL	NULL	NULL	NULL	pra4	taskList2	转基因大豆	NULL	NULL	NULL	NULL	NULL	NULL	NULL
大创sc-iat	2	2	<?xml version="1.0"?>\n<Clock xmlns:dt="urn:schemas-microsoft-com:datatypes"><Description dt:dt="string">E-Prime Primary Realtime Clock</Description><StartTime><Timestamp dt:dt="int">0</Timestamp><DateUtc dt:dt="string">2021-10-22T02:00:14Z</DateUtc></StartTime><FrequencyChanges><FrequencyChange><Frequency dt:dt="r8">10000000</Frequency><Timestamp dt:dt="r8">17671510370172</Timestamp><Current dt:…	59.965	1.0.0.21	1	2016978559	2.0.10.182	10-22-2021	2021-10-22 02:00:16	10:00:16	2.0.10.92	1	affpro	WordList	1	1	1	151	f	NULL	NULL	NULL	NULL	NULL	NULL	NULL	NULL	NULL	NULL	NULL	NULL	4	NULL	NULL	NULL	NULL	NULL	NULL	pra4	taskList2	创新的	NULL	NULL	NULL	NULL	NULL	NULL	NULL
大创sc-iat	2	2	<?xml version="1.0"?>\n<Clock xmlns:dt="urn:schemas-microsoft-com:datatypes"><Description dt:dt="string">E-Prime Primary Realtime Clock</Description><StartTime><Timestamp dt:dt="int">0</Timestamp><DateUtc dt:dt="string">2021-10-22T02:00:14Z</DateUtc></StartTime><FrequencyChanges><FrequencyChange><Frequency dt:dt="r8">10000000</Frequency><Timestamp dt:dt="r8">17671510370172</Timestamp><Current dt:…	59.965	1.0.0.21	1	2016978559	2.0.10.182	10-22-2021	2021-10-22 02:00:16	10:00:16	2.0.10.92	1	affpro	WordList	1	1	1	152	j	NULL	NULL	NULL	NULL	NULL	NULL	NULL	NULL	1	NULL	NULL	NULL	NULL	NULL	NULL	NULL	NULL	NULL	NULL	pra4	taskList2	不成熟的	NULL	NULL	NULL	NULL	NULL	NULL	NULL
大创sc-iat	2	2	<?xml version="1.0"?>\n<Clock xmlns:dt="urn:schemas-microsoft-com:datatypes"><Description dt:dt="string">E-Prime Primary Realtime Clock</Description><StartTime><Timestamp dt:dt="int">0</Timestamp><DateUtc dt:dt="string">2021-10-22T02:00:14Z</DateUtc></StartTime><FrequencyChanges><FrequencyChange><Frequency dt:dt="r8">10000000</Frequency><Timestamp dt:dt="r8">17671510370172</Timestamp><Current dt:…	59.965	1.0.0.21	1	2016978559	2.0.10.182	10-22-2021	2021-10-22 02:00:16	10:00:16	2.0.10.92	1	affpro	WordList	1	1	1	153	f	NULL	NULL	NULL	NULL	NULL	NULL	NULL	NULL	NULL	NULL	NULL	NULL	1	NULL	NULL	NULL	NULL	NULL	NULL	pra4	taskList2	科学的	NULL	NULL	NULL	NULL	NULL	NULL	NULL
大创sc-iat	2	2	<?xml version="1.0"?>\n<Clock xmlns:dt="urn:schemas-microsoft-com:datatypes"><Description dt:dt="string">E-Prime Primary Realtime Clock</Description><StartTime><Timestamp dt:dt="int">0</Timestamp><DateUtc dt:dt="string">2021-10-22T02:00:14Z</DateUtc></StartTime><FrequencyChanges><FrequencyChange><Frequency dt:dt="r8">10000000</Frequency><Timestamp dt:dt="r8">17671510370172</Timestamp><Current dt:…	59.965	1.0.0.21	1	2016978559	2.0.10.182	10-22-2021	2021-10-22 02:00:16	10:00:16	2.0.10.92	1	affpro	WordList	1	1	1	154	j	NULL	NULL	NULL	NULL	2	NULL	NULL	NULL	NULL	NULL	NULL	NULL	NULL	NULL	NULL	NULL	NULL	NULL	NULL	pra4	taskList2	抗虫害棉花	NULL	NULL	NULL	NULL	NULL	NULL	NULL
大创sc-iat	2	2	<?xml version="1.0"?>\n<Clock xmlns:dt="urn:schemas-microsoft-com:datatypes"><Description dt:dt="string">E-Prime Primary Realtime Clock</Description><StartTime><Timestamp dt:dt="int">0</Timestamp><DateUtc dt:dt="string">2021-10-22T02:00:14Z</DateUtc></StartTime><FrequencyChanges><FrequencyChange><Frequency dt:dt="r8">10000000</Frequency><Timestamp dt:dt="r8">17671510370172</Timestamp><Current dt:…	59.965	1.0.0.21	1	2016978559	2.0.10.182	10-22-2021	2021-10-22 02:00:16	10:00:16	2.0.10.92	1	affpro	WordList	1	1	1	155	j	NULL	NULL	NULL	NULL	NULL	NULL	NULL	NULL	4	NULL	NULL	NULL	NULL	NULL	NULL	NULL	NULL	NULL	NULL	pra4	taskList2	有争议的	NULL	NULL	NULL	NULL	NULL	NULL	NULL
大创sc-iat	2	2	<?xml version="1.0"?>\n<Clock xmlns:dt="urn:schemas-microsoft-com:datatypes"><Description dt:dt="string">E-Prime Primary Realtime Clock</Description><StartTime><Timestamp dt:dt="int">0</Timestamp><DateUtc dt:dt="string">2021-10-22T02:00:14Z</DateUtc></StartTime><FrequencyChanges><FrequencyChange><Frequency dt:dt="r8">10000000</Frequency><Timestamp dt:dt="r8">17671510370172</Timestamp><Current dt:…	59.965	1.0.0.21	1	2016978559	2.0.10.182	10-22-2021	2021-10-22 02:00:16	10:00:16	2.0.10.92	1	affpro	WordList	1	1	1	156	f	NULL	NULL	NULL	NULL	NULL	NULL	NULL	NULL	NULL	NULL	NULL	NULL	2	NULL	NULL	NULL	NULL	NULL	NULL	pra4	taskList2	高产的	NULL	NULL	NULL	NULL	NULL	NULL	NULL
大创sc-iat	2	2	<?xml version="1.0"?>\n<Clock xmlns:dt="urn:schemas-microsoft-com:datatypes"><Description dt:dt="string">E-Prime Primary Realtime Clock</Description><StartTime><Timestamp dt:dt="int">0</Timestamp><DateUtc dt:dt="string">2021-10-22T02:00:14Z</DateUtc></StartTime><FrequencyChanges><FrequencyChange><Frequency dt:dt="r8">10000000</Frequency><Timestamp dt:dt="r8">17671510370172</Timestamp><Current dt:…	59.965	1.0.0.21	1	2016978559	2.0.10.182	10-22-2021	2021-10-22 02:00:16	10:00:16	2.0.10.92	1	affpro	WordList	1	1	1	157	j	NULL	NULL	NULL	NULL	NULL	NULL	NULL	NULL	3	NULL	NULL	NULL	NULL	NULL	NULL	NULL	NULL	NULL	NULL	pra4	taskList2	非天然的	NULL	NULL	NULL	NULL	NULL	NULL	NULL
大创sc-iat	2	2	<?xml version="1.0"?>\n<Clock xmlns:dt="urn:schemas-microsoft-com:datatypes"><Description dt:dt="string">E-Prime Primary Realtime Clock</Description><StartTime><Timestamp dt:dt="int">0</Timestamp><DateUtc dt:dt="string">2021-10-22T02:00:14Z</DateUtc></StartTime><FrequencyChanges><FrequencyChange><Frequency dt:dt="r8">10000000</Frequency><Timestamp dt:dt="r8">17671510370172</Timestamp><Current dt:…	59.965	1.0.0.21	1	2016978559	2.0.10.182	10-22-2021	2021-10-22 02:00:16	10:00:16	2.0.10.92	1	affpro	WordList	1	1	1	158	f	NULL	NULL	NULL	NULL	NULL	NULL	NULL	NULL	NULL	NULL	NULL	NULL	3	NULL	NULL	NULL	NULL	NULL	NULL	pra4	taskList2	高科技的	NULL	NULL	NULL	NULL	NULL	NULL	NULL
大创sc-iat	2	2	<?xml version="1.0"?>\n<Clock xmlns:dt="urn:schemas-microsoft-com:datatypes"><Description dt:dt="string">E-Prime Primary Realtime Clock</Description><StartTime><Timestamp dt:dt="int">0</Timestamp><DateUtc dt:dt="string">2021-10-22T02:00:14Z</DateUtc></StartTime><FrequencyChanges><FrequencyChange><Frequency dt:dt="r8">10000000</Frequency><Timestamp dt:dt="r8">17671510370172</Timestamp><Current dt:…	59.965	1.0.0.21	1	2016978559	2.0.10.182	10-22-2021	2021-10-22 02:00:16	10:00:16	2.0.10.92	1	affpro	WordList	1	1	1	159	f	NULL	NULL	NULL	NULL	NULL	NULL	NULL	NULL	NULL	NULL	NULL	NULL	4	NULL	NULL	NULL	NULL	NULL	NULL	pra4	taskList2	创新的	NULL	NULL	NULL	NULL	NULL	NULL	NULL
大创sc-iat	2	2	<?xml version="1.0"?>\n<Clock xmlns:dt="urn:schemas-microsoft-com:datatypes"><Description dt:dt="string">E-Prime Primary Realtime Clock</Description><StartTime><Timestamp dt:dt="int">0</Timestamp><DateUtc dt:dt="string">2021-10-22T02:00:14Z</DateUtc></StartTime><FrequencyChanges><FrequencyChange><Frequency dt:dt="r8">10000000</Frequency><Timestamp dt:dt="r8">17671510370172</Timestamp><Current dt:…	59.965	1.0.0.21	1	2016978559	2.0.10.182	10-22-2021	2021-10-22 02:00:16	10:00:16	2.0.10.92	1	affpro	WordList	1	1	1	160	j	NULL	NULL	NULL	NULL	4	NULL	NULL	NULL	NULL	NULL	NULL	NULL	NULL	NULL	NULL	NULL	NULL	NULL	NULL	pra4	taskList2	动物转基因	NULL	NULL	NULL	NULL	NULL	NULL	NULL
大创sc-iat	2	2	<?xml version="1.0"?>\n<Clock xmlns:dt="urn:schemas-microsoft-com:datatypes"><Description dt:dt="string">E-Prime Primary Realtime Clock</Description><StartTime><Timestamp dt:dt="int">0</Timestamp><DateUtc dt:dt="string">2021-10-22T02:00:14Z</DateUtc></StartTime><FrequencyChanges><FrequencyChange><Frequency dt:dt="r8">10000000</Frequency><Timestamp dt:dt="r8">17671510370172</Timestamp><Current dt:…	59.965	1.0.0.21	1	2016978559	2.0.10.182	10-22-2021	2021-10-22 02:00:16	10:00:16	2.0.10.92	1	affpro	WordList	1	1	1	161	j	NULL	NULL	NULL	NULL	NULL	NULL	NULL	NULL	2	NULL	NULL	NULL	NULL	NULL	NULL	NULL	NULL	NULL	NULL	pra4	taskList2	高风险的	NULL	NULL	NULL	NULL	NULL	NULL	NULL
大创sc-iat	2	2	<?xml version="1.0"?>\n<Clock xmlns:dt="urn:schemas-microsoft-com:datatypes"><Description dt:dt="string">E-Prime Primary Realtime Clock</Description><StartTime><Timestamp dt:dt="int">0</Timestamp><DateUtc dt:dt="string">2021-10-22T02:00:14Z</DateUtc></StartTime><FrequencyChanges><FrequencyChange><Frequency dt:dt="r8">10000000</Frequency><Timestamp dt:dt="r8">17671510370172</Timestamp><Current dt:…	59.965	1.0.0.21	1	2016978559	2.0.10.182	10-22-2021	2021-10-22 02:00:16	10:00:16	2.0.10.92	1	affpro	WordList	1	1	1	162	f	NULL	NULL	NULL	NULL	NULL	NULL	NULL	NULL	NULL	NULL	NULL	NULL	1	NULL	NULL	NULL	NULL	NULL	NULL	pra4	taskList2	科学的	NULL	NULL	NULL	NULL	NULL	NULL	NULL
大创sc-iat	2	2	<?xml version="1.0"?>\n<Clock xmlns:dt="urn:schemas-microsoft-com:datatypes"><Description dt:dt="string">E-Prime Primary Realtime Clock</Description><StartTime><Timestamp dt:dt="int">0</Timestamp><DateUtc dt:dt="string">2021-10-22T02:00:14Z</DateUtc></StartTime><FrequencyChanges><FrequencyChange><Frequency dt:dt="r8">10000000</Frequency><Timestamp dt:dt="r8">17671510370172</Timestamp><Current dt:…	59.965	1.0.0.21	1	2016978559	2.0.10.182	10-22-2021	2021-10-22 02:00:16	10:00:16	2.0.10.92	1	affpro	WordList	1	1	1	163	j	NULL	NULL	NULL	NULL	3	NULL	NULL	NULL	NULL	NULL	NULL	NULL	NULL	NULL	NULL	NULL	NULL	NULL	NULL	pra4	taskList2	转基因大豆	NULL	NULL	NULL	NULL	NULL	NULL	NULL
大创sc-iat	2	2	<?xml version="1.0"?>\n<Clock xmlns:dt="urn:schemas-microsoft-com:datatypes"><Description dt:dt="string">E-Prime Primary Realtime Clock</Description><StartTime><Timestamp dt:dt="int">0</Timestamp><DateUtc dt:dt="string">2021-10-22T02:00:14Z</DateUtc></StartTime><FrequencyChanges><FrequencyChange><Frequency dt:dt="r8">10000000</Frequency><Timestamp dt:dt="r8">17671510370172</Timestamp><Current dt:…	59.965	1.0.0.21	1	2016978559	2.0.10.182	10-22-2021	2021-10-22 02:00:16	10:00:16	2.0.10.92	1	affpro	WordList	1	1	1	164	f	NULL	NULL	NULL	NULL	NULL	NULL	NULL	NULL	NULL	NULL	NULL	NULL	2	NULL	NULL	NULL	NULL	NULL	NULL	pra4	taskList2	高产的	NULL	NULL	NULL	NULL	NULL	NULL	NULL
大创sc-iat	2	2	<?xml version="1.0"?>\n<Clock xmlns:dt="urn:schemas-microsoft-com:datatypes"><Description dt:dt="string">E-Prime Primary Realtime Clock</Description><StartTime><Timestamp dt:dt="int">0</Timestamp><DateUtc dt:dt="string">2021-10-22T02:00:14Z</DateUtc></StartTime><FrequencyChanges><FrequencyChange><Frequency dt:dt="r8">10000000</Frequency><Timestamp dt:dt="r8">17671510370172</Timestamp><Current dt:…	59.965	1.0.0.21	1	2016978559	2.0.10.182	10-22-2021	2021-10-22 02:00:16	10:00:16	2.0.10.92	1	affpro	WordList	1	1	1	165	j	NULL	NULL	NULL	NULL	1	NULL	NULL	NULL	NULL	NULL	NULL	NULL	NULL	NULL	NULL	NULL	NULL	NULL	NULL	pra4	taskList2	转基因食物	NULL	NULL	NULL	NULL	NULL	NULL	NULL
大创sc-iat	2	2	<?xml version="1.0"?>\n<Clock xmlns:dt="urn:schemas-microsoft-com:datatypes"><Description dt:dt="string">E-Prime Primary Realtime Clock</Description><StartTime><Timestamp dt:dt="int">0</Timestamp><DateUtc dt:dt="string">2021-10-22T02:00:14Z</DateUtc></StartTime><FrequencyChanges><FrequencyChange><Frequency dt:dt="r8">10000000</Frequency><Timestamp dt:dt="r8">17671510370172</Timestamp><Current dt:…	59.965	1.0.0.21	1	2016978559	2.0.10.182	10-22-2021	2021-10-22 02:00:16	10:00:16	2.0.10.92	1	affpro	WordList	1	1	1	166	j	NULL	NULL	NULL	NULL	NULL	NULL	NULL	NULL	1	NULL	NULL	NULL	NULL	NULL	NULL	NULL	NULL	NULL	NULL	pra4	taskList2	不成熟的	NULL	NULL	NULL	NULL	NULL	NULL	NULL
大创sc-iat	2	2	<?xml version="1.0"?>\n<Clock xmlns:dt="urn:schemas-microsoft-com:datatypes"><Description dt:dt="string">E-Prime Primary Realtime Clock</Description><StartTime><Timestamp dt:dt="int">0</Timestamp><DateUtc dt:dt="string">2021-10-22T02:00:14Z</DateUtc></StartTime><FrequencyChanges><FrequencyChange><Frequency dt:dt="r8">10000000</Frequency><Timestamp dt:dt="r8">17671510370172</Timestamp><Current dt:…	59.965	1.0.0.21	1	2016978559	2.0.10.182	10-22-2021	2021-10-22 02:00:16	10:00:16	2.0.10.92	1	affpro	WordList	1	1	1	167	f	NULL	NULL	NULL	NULL	NULL	NULL	NULL	NULL	NULL	NULL	NULL	NULL	3	NULL	NULL	NULL	NULL	NULL	NULL	pra4	taskList2	高科技的	NULL	NULL	NULL	NULL	NULL	NULL	NULL
大创sc-iat	2	2	<?xml version="1.0"?>\n<Clock xmlns:dt="urn:schemas-microsoft-com:datatypes"><Description dt:dt="string">E-Prime Primary Realtime Clock</Description><StartTime><Timestamp dt:dt="int">0</Timestamp><DateUtc dt:dt="string">2021-10-22T02:00:14Z</DateUtc></StartTime><FrequencyChanges><FrequencyChange><Frequency dt:dt="r8">10000000</Frequency><Timestamp dt:dt="r8">17671510370172</Timestamp><Current dt:…	59.965	1.0.0.21	1	2016978559	2.0.10.182	10-22-2021	2021-10-22 02:00:16	10:00:16	2.0.10.92	1	affpro	WordList	1	1	1	168	f	NULL	NULL	NULL	NULL	NULL	NULL	NULL	NULL	NULL	NULL	NULL	NULL	4	NULL	NULL	NULL	NULL	NULL	NULL	pra4	taskList2	创新的	NULL	NULL	NULL	NULL	NULL	NULL	NULL
大创sc-iat	2	2	<?xml version="1.0"?>\n<Clock xmlns:dt="urn:schemas-microsoft-com:datatypes"><Description dt:dt="string">E-Prime Primary Realtime Clock</Description><StartTime><Timestamp dt:dt="int">0</Timestamp><DateUtc dt:dt="string">2021-10-22T02:00:14Z</DateUtc></StartTime><FrequencyChanges><FrequencyChange><Frequency dt:dt="r8">10000000</Frequency><Timestamp dt:dt="r8">17671510370172</Timestamp><Current dt:…	59.965	1.0.0.21	1	2016978559	2.0.10.182	10-22-2021	2021-10-22 02:00:16	10:00:16	2.0.10.92	1	affpro	WordList	1	1	1	169	j	NULL	NULL	NULL	NULL	3	NULL	NULL	NULL	NULL	NULL	NULL	NULL	NULL	NULL	NULL	NULL	NULL	NULL	NULL	pra4	taskList2	转基因大豆	NULL	NULL	NULL	NULL	NULL	NULL	NULL
大创sc-iat	2	2	<?xml version="1.0"?>\n<Clock xmlns:dt="urn:schemas-microsoft-com:datatypes"><Description dt:dt="string">E-Prime Primary Realtime Clock</Description><StartTime><Timestamp dt:dt="int">0</Timestamp><DateUtc dt:dt="string">2021-10-22T02:00:14Z</DateUtc></StartTime><FrequencyChanges><FrequencyChange><Frequency dt:dt="r8">10000000</Frequency><Timestamp dt:dt="r8">17671510370172</Timestamp><Current dt:…	59.965	1.0.0.21	1	2016978559	2.0.10.182	10-22-2021	2021-10-22 02:00:16	10:00:16	2.0.10.92	1	affpro	WordList	1	1	1	170	j	NULL	NULL	NULL	NULL	NULL	NULL	NULL	NULL	3	NULL	NULL	NULL	NULL	NULL	NULL	NULL	NULL	NULL	NULL	pra4	taskList2	非天然的	NULL	NULL	NULL	NULL	NULL	NULL	NULL
大创sc-iat	2	2	<?xml version="1.0"?>\n<Clock xmlns:dt="urn:schemas-microsoft-com:datatypes"><Description dt:dt="string">E-Prime Primary Realtime Clock</Description><StartTime><Timestamp dt:dt="int">0</Timestamp><DateUtc dt:dt="string">2021-10-22T02:00:14Z</DateUtc></StartTime><FrequencyChanges><FrequencyChange><Frequency dt:dt="r8">10000000</Frequency><Timestamp dt:dt="r8">17671510370172</Timestamp><Current dt:…	59.965	1.0.0.21	1	2016978559	2.0.10.182	10-22-2021	2021-10-22 02:00:16	10:00:16	2.0.10.92	1	affpro	WordList	1	1	1	171	f	NULL	NULL	NULL	NULL	NULL	NULL	NULL	NULL	NULL	NULL	NULL	NULL	1	NULL	NULL	NULL	NULL	NULL	NULL	pra4	taskList2	科学的	NULL	NULL	NULL	NULL	NULL	NULL	NULL
大创sc-iat	2	2	<?xml version="1.0"?>\n<Clock xmlns:dt="urn:schemas-microsoft-com:datatypes"><Description dt:dt="string">E-Prime Primary Realtime Clock</Description><StartTime><Timestamp dt:dt="int">0</Timestamp><DateUtc dt:dt="string">2021-10-22T02:00:14Z</DateUtc></StartTime><FrequencyChanges><FrequencyChange><Frequency dt:dt="r8">10000000</Frequency><Timestamp dt:dt="r8">17671510370172</Timestamp><Current dt:…	59.965	1.0.0.21	1	2016978559	2.0.10.182	10-22-2021	2021-10-22 02:00:16	10:00:16	2.0.10.92	1	affpro	WordList	1	1	1	172	f	NULL	NULL	NULL	NULL	NULL	NULL	NULL	NULL	NULL	NULL	NULL	NULL	2	NULL	NULL	NULL	NULL	NULL	NULL	pra4	taskList2	高产的	NULL	NULL	NULL	NULL	NULL	NULL	NULL
大创sc-iat	2	2	<?xml version="1.0"?>\n<Clock xmlns:dt="urn:schemas-microsoft-com:datatypes"><Description dt:dt="string">E-Prime Primary Realtime Clock</Description><StartTime><Timestamp dt:dt="int">0</Timestamp><DateUtc dt:dt="string">2021-10-22T02:00:14Z</DateUtc></StartTime><FrequencyChanges><FrequencyChange><Frequency dt:dt="r8">10000000</Frequency><Timestamp dt:dt="r8">17671510370172</Timestamp><Current dt:…	59.965	1.0.0.21	1	2016978559	2.0.10.182	10-22-2021	2021-10-22 02:00:16	10:00:16	2.0.10.92	1	affpro	WordList	1	1	1	173	j	NULL	NULL	NULL	NULL	2	NULL	NULL	NULL	NULL	NULL	NULL	NULL	NULL	NULL	NULL	NULL	NULL	NULL	NULL	pra4	taskList2	抗虫害棉花	NULL	NULL	NULL	NULL	NULL	NULL	NULL
大创sc-iat	2	2	<?xml version="1.0"?>\n<Clock xmlns:dt="urn:schemas-microsoft-com:datatypes"><Description dt:dt="string">E-Prime Primary Realtime Clock</Description><StartTime><Timestamp dt:dt="int">0</Timestamp><DateUtc dt:dt="string">2021-10-22T02:00:14Z</DateUtc></StartTime><FrequencyChanges><FrequencyChange><Frequency dt:dt="r8">10000000</Frequency><Timestamp dt:dt="r8">17671510370172</Timestamp><Current dt:…	59.965	1.0.0.21	1	2016978559	2.0.10.182	10-22-2021	2021-10-22 02:00:16	10:00:16	2.0.10.92	1	affpro	WordList	1	1	1	174	j	NULL	NULL	NULL	NULL	NULL	NULL	NULL	NULL	2	NULL	NULL	NULL	NULL	NULL	NULL	NULL	NULL	NULL	NULL	pra4	taskList2	高风险的	NULL	NULL	NULL	NULL	NULL	NULL	NULL
大创sc-iat	2	2	<?xml version="1.0"?>\n<Clock xmlns:dt="urn:schemas-microsoft-com:datatypes"><Description dt:dt="string">E-Prime Primary Realtime Clock</Description><StartTime><Timestamp dt:dt="int">0</Timestamp><DateUtc dt:dt="string">2021-10-22T02:00:14Z</DateUtc></StartTime><FrequencyChanges><FrequencyChange><Frequency dt:dt="r8">10000000</Frequency><Timestamp dt:dt="r8">17671510370172</Timestamp><Current dt:…	59.965	1.0.0.21	1	2016978559	2.0.10.182	10-22-2021	2021-10-22 02:00:16	10:00:16	2.0.10.92	1	affpro	WordList	1	1	1	175	f	NULL	NULL	NULL	NULL	NULL	NULL	NULL	NULL	NULL	NULL	NULL	NULL	3	NULL	NULL	NULL	NULL	NULL	NULL	pra4	taskList2	高科技的	NULL	NULL	NULL	NULL	NULL	NULL	NULL
大创sc-iat	2	2	<?xml version="1.0"?>\n<Clock xmlns:dt="urn:schemas-microsoft-com:datatypes"><Description dt:dt="string">E-Prime Primary Realtime Clock</Description><StartTime><Timestamp dt:dt="int">0</Timestamp><DateUtc dt:dt="string">2021-10-22T02:00:14Z</DateUtc></StartTime><FrequencyChanges><FrequencyChange><Frequency dt:dt="r8">10000000</Frequency><Timestamp dt:dt="r8">17671510370172</Timestamp><Current dt:…	59.965	1.0.0.21	1	2016978559	2.0.10.182	10-22-2021	2021-10-22 02:00:16	10:00:16	2.0.10.92	1	affpro	WordList	1	1	1	176	f	NULL	NULL	NULL	NULL	NULL	NULL	NULL	NULL	NULL	NULL	NULL	NULL	4	NULL	NULL	NULL	NULL	NULL	NULL	pra4	taskList2	创新的	NULL	NULL	NULL	NULL	NULL	NULL	NULL
大创sc-iat	2	2	<?xml version="1.0"?>\n<Clock xmlns:dt="urn:schemas-microsoft-com:datatypes"><Description dt:dt="string">E-Prime Primary Realtime Clock</Description><StartTime><Timestamp dt:dt="int">0</Timestamp><DateUtc dt:dt="string">2021-10-22T02:00:14Z</DateUtc></StartTime><FrequencyChanges><FrequencyChange><Frequency dt:dt="r8">10000000</Frequency><Timestamp dt:dt="r8">17671510370172</Timestamp><Current dt:…	59.965	1.0.0.21	1	2016978559	2.0.10.182	10-22-2021	2021-10-22 02:00:16	10:00:16	2.0.10.92	1	affpro	WordList	1	1	1	177	j	NULL	NULL	NULL	NULL	NULL	NULL	NULL	NULL	4	NULL	NULL	NULL	NULL	NULL	NULL	NULL	NULL	NULL	NULL	pra4	taskList2	有争议的	NULL	NULL	NULL	NULL	NULL	NULL	NULL
大创sc-iat	2	2	<?xml version="1.0"?>\n<Clock xmlns:dt="urn:schemas-microsoft-com:datatypes"><Description dt:dt="string">E-Prime Primary Realtime Clock</Description><StartTime><Timestamp dt:dt="int">0</Timestamp><DateUtc dt:dt="string">2021-10-22T02:00:14Z</DateUtc></StartTime><FrequencyChanges><FrequencyChange><Frequency dt:dt="r8">10000000</Frequency><Timestamp dt:dt="r8">17671510370172</Timestamp><Current dt:…	59.965	1.0.0.21	1	2016978559	2.0.10.182	10-22-2021	2021-10-22 02:00:16	10:00:16	2.0.10.92	1	affpro	WordList	1	1	1	178	f	NULL	NULL	NULL	NULL	NULL	NULL	NULL	NULL	NULL	NULL	NULL	NULL	2	NULL	NULL	NULL	NULL	NULL	NULL	pra4	taskList2	高产的	NULL	NULL	NULL	NULL	NULL	NULL	NULL
大创sc-iat	2	2	<?xml version="1.0"?>\n<Clock xmlns:dt="urn:schemas-microsoft-com:datatypes"><Description dt:dt="string">E-Prime Primary Realtime Clock</Description><StartTime><Timestamp dt:dt="int">0</Timestamp><DateUtc dt:dt="string">2021-10-22T02:00:14Z</DateUtc></StartTime><FrequencyChanges><FrequencyChange><Frequency dt:dt="r8">10000000</Frequency><Timestamp dt:dt="r8">17671510370172</Timestamp><Current dt:…	59.965	1.0.0.21	1	2016978559	2.0.10.182	10-22-2021	2021-10-22 02:00:16	10:00:16	2.0.10.92	1	affpro	WordList	1	1	1	179	j	NULL	NULL	NULL	NULL	1	NULL	NULL	NULL	NULL	NULL	NULL	NULL	NULL	NULL	NULL	NULL	NULL	NULL	NULL	pra4	taskList2	转基因食物	NULL	NULL	NULL	NULL	NULL	NULL	NULL
大创sc-iat	2	2	<?xml version="1.0"?>\n<Clock xmlns:dt="urn:schemas-microsoft-com:datatypes"><Description dt:dt="string">E-Prime Primary Realtime Clock</Description><StartTime><Timestamp dt:dt="int">0</Timestamp><DateUtc dt:dt="string">2021-10-22T02:00:14Z</DateUtc></StartTime><FrequencyChanges><FrequencyChange><Frequency dt:dt="r8">10000000</Frequency><Timestamp dt:dt="r8">17671510370172</Timestamp><Current dt:…	59.965	1.0.0.21	1	2016978559	2.0.10.182	10-22-2021	2021-10-22 02:00:16	10:00:16	2.0.10.92	1	affpro	WordList	1	1	1	180	f	NULL	NULL	NULL	NULL	NULL	NULL	NULL	NULL	NULL	NULL	NULL	NULL	1	NULL	NULL	NULL	NULL	NULL	NULL	pra4	taskList2	科学的	NULL	NULL	NULL	NULL	NULL	NULL	NULL
大创sc-iat	2	2	<?xml version="1.0"?>\n<Clock xmlns:dt="urn:schemas-microsoft-com:datatypes"><Description dt:dt="string">E-Prime Primary Realtime Clock</Description><StartTime><Timestamp dt:dt="int">0</Timestamp><DateUtc dt:dt="string">2021-10-22T02:00:14Z</DateUtc></StartTime><FrequencyChanges><FrequencyChange><Frequency dt:dt="r8">10000000</Frequency><Timestamp dt:dt="r8">17671510370172</Timestamp><Current dt:…	59.965	1.0.0.21	1	2016978559	2.0.10.182	10-22-2021	2021-10-22 02:00:16	10:00:16	2.0.10.92	1	affpro	WordList	1	1	1	181	j	NULL	NULL	NULL	NULL	NULL	NULL	NULL	NULL	1	NULL	NULL	NULL	NULL	NULL	NULL	NULL	NULL	NULL	NULL	pra4	taskList2	不成熟的	NULL	NULL	NULL	NULL	NULL	NULL	NULL
大创sc-iat	2	2	<?xml version="1.0"?>\n<Clock xmlns:dt="urn:schemas-microsoft-com:datatypes"><Description dt:dt="string">E-Prime Primary Realtime Clock</Description><StartTime><Timestamp dt:dt="int">0</Timestamp><DateUtc dt:dt="string">2021-10-22T02:00:14Z</DateUtc></StartTime><FrequencyChanges><FrequencyChange><Frequency dt:dt="r8">10000000</Frequency><Timestamp dt:dt="r8">17671510370172</Timestamp><Current dt:…	59.965	1.0.0.21	1	2016978559	2.0.10.182	10-22-2021	2021-10-22 02:00:16	10:00:16	2.0.10.92	1	affpro	WordList	1	1	1	182	f	NULL	NULL	NULL	NULL	NULL	NULL	NULL	NULL	NULL	NULL	NULL	NULL	3	NULL	NULL	NULL	NULL	NULL	NULL	pra4	taskList2	高科技的	NULL	NULL	NULL	NULL	NULL	NULL	NULL
大创sc-iat	2	2	<?xml version="1.0"?>\n<Clock xmlns:dt="urn:schemas-microsoft-com:datatypes"><Description dt:dt="string">E-Prime Primary Realtime Clock</Description><StartTime><Timestamp dt:dt="int">0</Timestamp><DateUtc dt:dt="string">2021-10-22T02:00:14Z</DateUtc></StartTime><FrequencyChanges><FrequencyChange><Frequency dt:dt="r8">10000000</Frequency><Timestamp dt:dt="r8">17671510370172</Timestamp><Current dt:…	59.965	1.0.0.21	1	2016978559	2.0.10.182	10-22-2021	2021-10-22 02:00:16	10:00:16	2.0.10.92	1	affpro	WordList	1	1	1	183	j	NULL	NULL	NULL	NULL	4	NULL	NULL	NULL	NULL	NULL	NULL	NULL	NULL	NULL	NULL	NULL	NULL	NULL	NULL	pra4	taskList2	动物转基因	NULL	NULL	NULL	NULL	NULL	NULL	NULL
大创sc-iat	2	2	<?xml version="1.0"?>\n<Clock xmlns:dt="urn:schemas-microsoft-com:datatypes"><Description dt:dt="string">E-Prime Primary Realtime Clock</Description><StartTime><Timestamp dt:dt="int">0</Timestamp><DateUtc dt:dt="string">2021-10-22T02:00:14Z</DateUtc></StartTime><FrequencyChanges><FrequencyChange><Frequency dt:dt="r8">10000000</Frequency><Timestamp dt:dt="r8">17671510370172</Timestamp><Current dt:…	59.965	1.0.0.21	1	2016978559	2.0.10.182	10-22-2021	2021-10-22 02:00:16	10:00:16	2.0.10.92	1	affpro	WordList	1	1	1	184	f	NULL	NULL	NULL	NULL	NULL	NULL	NULL	NULL	NULL	NULL	NULL	NULL	4	NULL	NULL	NULL	NULL	NULL	NULL	pra4	taskList2	创新的	NULL	NULL	NULL	NULL	NULL	NULL	NULL
大创sc-iat	2	2	<?xml version="1.0"?>\n<Clock xmlns:dt="urn:schemas-microsoft-com:datatypes"><Description dt:dt="string">E-Prime Primary Realtime Clock</Description><StartTime><Timestamp dt:dt="int">0</Timestamp><DateUtc dt:dt="string">2021-10-22T02:00:14Z</DateUtc></StartTime><FrequencyChanges><FrequencyChange><Frequency dt:dt="r8">10000000</Frequency><Timestamp dt:dt="r8">17671510370172</Timestamp><Current dt:…	59.965	1.0.0.21	1	2016978559	2.0.10.182	10-22-2021	2021-10-22 02:00:16	10:00:16	2.0.10.92	1	affpro	WordList	1	1	1	185	j	NULL	NULL	NULL	NULL	NULL	NULL	NULL	NULL	2	NULL	NULL	NULL	NULL	NULL	NULL	NULL	NULL	NULL	NULL	pra4	taskList2	高风险的	NULL	NULL	NULL	NULL	NULL	NULL	NULL
大创sc-iat	2	2	<?xml version="1.0"?>\n<Clock xmlns:dt="urn:schemas-microsoft-com:datatypes"><Description dt:dt="string">E-Prime Primary Realtime Clock</Description><StartTime><Timestamp dt:dt="int">0</Timestamp><DateUtc dt:dt="string">2021-10-22T02:00:14Z</DateUtc></StartTime><FrequencyChanges><FrequencyChange><Frequency dt:dt="r8">10000000</Frequency><Timestamp dt:dt="r8">17671510370172</Timestamp><Current dt:…	59.965	1.0.0.21	1	2016978559	2.0.10.182	10-22-2021	2021-10-22 02:00:16	10:00:16	2.0.10.92	1	affpro	WordList	1	1	1	186	j	NULL	NULL	NULL	NULL	1	NULL	NULL	NULL	NULL	NULL	NULL	NULL	NULL	NULL	NULL	NULL	NULL	NULL	NULL	pra4	taskList2	转基因食物	NULL	NULL	NULL	NULL	NULL	NULL	NULL
大创sc-iat	2	2	<?xml version="1.0"?>\n<Clock xmlns:dt="urn:schemas-microsoft-com:datatypes"><Description dt:dt="string">E-Prime Primary Realtime Clock</Description><StartTime><Timestamp dt:dt="int">0</Timestamp><DateUtc dt:dt="string">2021-10-22T02:00:14Z</DateUtc></StartTime><FrequencyChanges><FrequencyChange><Frequency dt:dt="r8">10000000</Frequency><Timestamp dt:dt="r8">17671510370172</Timestamp><Current dt:…	59.965	1.0.0.21	1	2016978559	2.0.10.182	10-22-2021	2021-10-22 02:00:16	10:00:16	2.0.10.92	1	affpro	WordList	1	1	1	187	f	NULL	NULL	NULL	NULL	NULL	NULL	NULL	NULL	NULL	NULL	NULL	NULL	2	NULL	NULL	NULL	NULL	NULL	NULL	pra4	taskList2	高产的	NULL	NULL	NULL	NULL	NULL	NULL	NULL
大创sc-iat	2	2	<?xml version="1.0"?>\n<Clock xmlns:dt="urn:schemas-microsoft-com:datatypes"><Description dt:dt="string">E-Prime Primary Realtime Clock</Description><StartTime><Timestamp dt:dt="int">0</Timestamp><DateUtc dt:dt="string">2021-10-22T02:00:14Z</DateUtc></StartTime><FrequencyChanges><FrequencyChange><Frequency dt:dt="r8">10000000</Frequency><Timestamp dt:dt="r8">17671510370172</Timestamp><Current dt:…	59.965	1.0.0.21	1	2016978559	2.0.10.182	10-22-2021	2021-10-22 02:00:16	10:00:16	2.0.10.92	1	affpro	WordList	1	1	1	188	f	NULL	NULL	NULL	NULL	NULL	NULL	NULL	NULL	NULL	NULL	NULL	NULL	3	NULL	NULL	NULL	NULL	NULL	NULL	pra4	taskList2	高科技的	NULL	NULL	NULL	NULL	NULL	NULL	NULL
大创sc-iat	2	2	<?xml version="1.0"?>\n<Clock xmlns:dt="urn:schemas-microsoft-com:datatypes"><Description dt:dt="string">E-Prime Primary Realtime Clock</Description><StartTime><Timestamp dt:dt="int">0</Timestamp><DateUtc dt:dt="string">2021-10-22T02:00:14Z</DateUtc></StartTime><FrequencyChanges><FrequencyChange><Frequency dt:dt="r8">10000000</Frequency><Timestamp dt:dt="r8">17671510370172</Timestamp><Current dt:…	59.965	1.0.0.21	1	2016978559	2.0.10.182	10-22-2021	2021-10-22 02:00:16	10:00:16	2.0.10.92	1	affpro	WordList	1	1	1	189	j	NULL	NULL	NULL	NULL	3	NULL	NULL	NULL	NULL	NULL	NULL	NULL	NULL	NULL	NULL	NULL	NULL	NULL	NULL	pra4	taskList2	转基因大豆	NULL	NULL	NULL	NULL	NULL	NULL	NULL
大创sc-iat	2	2	<?xml version="1.0"?>\n<Clock xmlns:dt="urn:schemas-microsoft-com:datatypes"><Description dt:dt="string">E-Prime Primary Realtime Clock</Description><StartTime><Timestamp dt:dt="int">0</Timestamp><DateUtc dt:dt="string">2021-10-22T02:00:14Z</DateUtc></StartTime><FrequencyChanges><FrequencyChange><Frequency dt:dt="r8">10000000</Frequency><Timestamp dt:dt="r8">17671510370172</Timestamp><Current dt:…	59.965	1.0.0.21	1	2016978559	2.0.10.182	10-22-2021	2021-10-22 02:00:16	10:00:16	2.0.10.92	1	affpro	WordList	1	1	1	190	j	NULL	NULL	NULL	NULL	NULL	NULL	NULL	NULL	1	NULL	NULL	NULL	NULL	NULL	NULL	NULL	NULL	NULL	NULL	pra4	taskList2	不成熟的	NULL	NULL	NULL	NULL	NULL	NULL	NULL
大创sc-iat	2	2	<?xml version="1.0"?>\n<Clock xmlns:dt="urn:schemas-microsoft-com:datatypes"><Description dt:dt="string">E-Prime Primary Realtime Clock</Description><StartTime><Timestamp dt:dt="int">0</Timestamp><DateUtc dt:dt="string">2021-10-22T02:00:14Z</DateUtc></StartTime><FrequencyChanges><FrequencyChange><Frequency dt:dt="r8">10000000</Frequency><Timestamp dt:dt="r8">17671510370172</Timestamp><Current dt:…	59.965	1.0.0.21	1	2016978559	2.0.10.182	10-22-2021	2021-10-22 02:00:16	10:00:16	2.0.10.92	1	affpro	WordList	1	1	1	191	f	NULL	NULL	NULL	NULL	NULL	NULL	NULL	NULL	NULL	NULL	NULL	NULL	1	NULL	NULL	NULL	NULL	NULL	NULL	pra4	taskList2	科学的	NULL	NULL	NULL	NULL	NULL	NULL	NULL
大创sc-iat	2	2	<?xml version="1.0"?>\n<Clock xmlns:dt="urn:schemas-microsoft-com:datatypes"><Description dt:dt="string">E-Prime Primary Realtime Clock</Description><StartTime><Timestamp dt:dt="int">0</Timestamp><DateUtc dt:dt="string">2021-10-22T02:00:14Z</DateUtc></StartTime><FrequencyChanges><FrequencyChange><Frequency dt:dt="r8">10000000</Frequency><Timestamp dt:dt="r8">17671510370172</Timestamp><Current dt:…	59.965	1.0.0.21	1	2016978559	2.0.10.182	10-22-2021	2021-10-22 02:00:16	10:00:16	2.0.10.92	1	affpro	WordList	1	1	1	192	f	NULL	NULL	NULL	NULL	NULL	NULL	NULL	NULL	NULL	NULL	NULL	NULL	4	NULL	NULL	NULL	NULL	NULL	NULL	pra4	taskList2	创新的	NULL	NULL	NULL	NULL	NULL	NULL	NULL
大创sc-iat	2	4	<?xml version="1.0"?>\n<Clock xmlns:dt="urn:schemas-microsoft-com:datatypes"><Description dt:dt="string">E-Prime Primary Realtime Clock</Description><StartTime><Timestamp dt:dt="int">0</Timestamp><DateUtc dt:dt="string">2021-10-22T02:18:14Z</DateUtc></StartTime><FrequencyChanges><FrequencyChange><Frequency dt:dt="r8">10000000</Frequency><Timestamp dt:dt="r8">17682314057908</Timestamp><Current dt:…	59.961	1.0.0.22	1	-64294794	2.0.10.182	10-22-2021	2021-10-22 02:18:15	10:18:15	2.0.10.92	1	affpro	WordList	1	1	1	1	f	NULL	2	NULL	NULL	NULL	NULL	NULL	NULL	NULL	NULL	NULL	NULL	NULL	1	1	1	NULL	NULL	NULL	pra1	practiceList1	抗虫害棉花	1	f	-999999	6	57239	0	f
大创sc-iat	2	4	<?xml version="1.0"?>\n<Clock xmlns:dt="urn:schemas-microsoft-com:datatypes"><Description dt:dt="string">E-Prime Primary Realtime Clock</Description><StartTime><Timestamp dt:dt="int">0</Timestamp><DateUtc dt:dt="string">2021-10-22T02:18:14Z</DateUtc></StartTime><FrequencyChanges><FrequencyChange><Frequency dt:dt="r8">10000000</Frequency><Timestamp dt:dt="r8">17682314057908</Timestamp><Current dt:…	59.961	1.0.0.22	1	-64294794	2.0.10.182	10-22-2021	2021-10-22 02:18:15	10:18:15	2.0.10.92	1	affpro	WordList	1	1	1	2	j	NULL	NULL	NULL	NULL	NULL	2	NULL	NULL	NULL	NULL	NULL	NULL	NULL	3	1	2	NULL	NULL	NULL	pra1	practiceList1	高风险的	1	j	-999999	-2	62679	0	j
大创sc-iat	2	4	<?xml version="1.0"?>\n<Clock xmlns:dt="urn:schemas-microsoft-com:datatypes"><Description dt:dt="string">E-Prime Primary Realtime Clock</Description><StartTime><Timestamp dt:dt="int">0</Timestamp><DateUtc dt:dt="string">2021-10-22T02:18:14Z</DateUtc></StartTime><FrequencyChanges><FrequencyChange><Frequency dt:dt="r8">10000000</Frequency><Timestamp dt:dt="r8">17682314057908</Timestamp><Current dt:…	59.961	1.0.0.22	1	-64294794	2.0.10.182	10-22-2021	2021-10-22 02:18:15	10:18:15	2.0.10.92	1	affpro	WordList	1	1	1	3	f	NULL	NULL	NULL	NULL	NULL	NULL	NULL	NULL	NULL	4	NULL	NULL	NULL	2	1	3	NULL	NULL	NULL	pra1	practiceList1	创新的	1	f	-999999	-2	65020	0	f
大创sc-iat	2	4	<?xml version="1.0"?>\n<Clock xmlns:dt="urn:schemas-microsoft-com:datatypes"><Description dt:dt="string">E-Prime Primary Realtime Clock</Description><StartTime><Timestamp dt:dt="int">0</Timestamp><DateUtc dt:dt="string">2021-10-22T02:18:14Z</DateUtc></StartTime><FrequencyChanges><FrequencyChange><Frequency dt:dt="r8">10000000</Frequency><Timestamp dt:dt="r8">17682314057908</Timestamp><Current dt:…	59.961	1.0.0.22	1	-64294794	2.0.10.182	10-22-2021	2021-10-22 02:18:15	10:18:15	2.0.10.92	1	affpro	WordList	1	1	1	4	j	NULL	NULL	NULL	NULL	NULL	1	NULL	NULL	NULL	NULL	NULL	NULL	NULL	3	1	4	NULL	NULL	NULL	pra1	practiceList1	不成熟的	1	j	-999999	-2	66532	0	j
大创sc-iat	2	4	<?xml version="1.0"?>\n<Clock xmlns:dt="urn:schemas-microsoft-com:datatypes"><Description dt:dt="string">E-Prime Primary Realtime Clock</Description><StartTime><Timestamp dt:dt="int">0</Timestamp><DateUtc dt:dt="string">2021-10-22T02:18:14Z</DateUtc></StartTime><FrequencyChanges><FrequencyChange><Frequency dt:dt="r8">10000000</Frequency><Timestamp dt:dt="r8">17682314057908</Timestamp><Current dt:…	59.961	1.0.0.22	1	-64294794	2.0.10.182	10-22-2021	2021-10-22 02:18:15	10:18:15	2.0.10.92	1	affpro	WordList	1	1	1	5	f	NULL	3	NULL	NULL	NULL	NULL	NULL	NULL	NULL	NULL	NULL	NULL	NULL	1	2	5	NULL	NULL	NULL	pra1	practiceList1	转基因大豆	1	f	-999999	-7	68446	0	f
大创sc-iat	2	4	<?xml version="1.0"?>\n<Clock xmlns:dt="urn:schemas-microsoft-com:datatypes"><Description dt:dt="string">E-Prime Primary Realtime Clock</Description><StartTime><Timestamp dt:dt="int">0</Timestamp><DateUtc dt:dt="string">2021-10-22T02:18:14Z</DateUtc></StartTime><FrequencyChanges><FrequencyChange><Frequency dt:dt="r8">10000000</Frequency><Timestamp dt:dt="r8">17682314057908</Timestamp><Current dt:…	59.961	1.0.0.22	1	-64294794	2.0.10.182	10-22-2021	2021-10-22 02:18:15	10:18:15	2.0.10.92	1	affpro	WordList	1	1	1	6	j	NULL	NULL	NULL	NULL	NULL	3	NULL	NULL	NULL	NULL	NULL	NULL	NULL	3	2	6	NULL	NULL	NULL	pra1	practiceList1	非天然的	1	j	-999999	-2	70376	0	j
大创sc-iat	2	4	<?xml version="1.0"?>\n<Clock xmlns:dt="urn:schemas-microsoft-com:datatypes"><Description dt:dt="string">E-Prime Primary Realtime Clock</Description><StartTime><Timestamp dt:dt="int">0</Timestamp><DateUtc dt:dt="string">2021-10-22T02:18:14Z</DateUtc></StartTime><FrequencyChanges><FrequencyChange><Frequency dt:dt="r8">10000000</Frequency><Timestamp dt:dt="r8">17682314057908</Timestamp><Current dt:…	59.961	1.0.0.22	1	-64294794	2.0.10.182	10-22-2021	2021-10-22 02:18:15	10:18:15	2.0.10.92	1	affpro	WordList	1	1	1	7	j	NULL	NULL	NULL	NULL	NULL	4	NULL	NULL	NULL	NULL	NULL	NULL	NULL	3	2	7	NULL	NULL	NULL	pra1	practiceList1	有争议的	1	j	-999999	-1	72390	0	j
[truncated: 12,857 more rows]
[truncated: 37 more columns]

## Sheet: Processed data
Serial number	educational level(undergraduate1 graduate2)	Gender (Male 1 Female 2)	age	Cognitive level	Incompatible task	Compatible task	(RT4-RT2)/SD
1	1	2	18	-1	641.736	621.708	-0.101239
2	2	2	21	0	753.25	728.069	-0.127286
[truncated: 68 more rows]
