# Supplementary material for: The implicit and explicit attitudes of Chinese university students towards genetic modification
Source: Front Psychol. 2022 Nov 23;13:1014395. doi: 10.3389/fpsyg.2022.1014395 (PMC9728140; doi:10.3389/fpsyg.2022.1014395)
Supplement: Supplementary file 3 [file Table_3.XLSX]

## Sheet: Original data
ExperimentName	Subject	Session	Clock.Information	Display.RefreshRate	ExperimentVersion	Group	RandomSeed	RuntimeVersion	SessionDate	SessionStartDateTimeUtc	SessionTime	StudioVersion	Block	Procedure[Block]	Running[Block]	WordList	WordList.Cycle	WordList.Sample	Trial	answer	answer2	negativeList	negativeList1	negativeList2	negativeList3	positiveList	positiveList1	positiveList2	positiveList3	practiceList1	practiceList1.Cycle	practiceList1.Sample	practiceList2	practiceList2.Cycle	practiceList2.Sample	Procedure[Trial]	Running[Trial]	stim	stim1.ACC	stim1.CRESP	stim1.DurationError	stim1.OnsetDelay	stim1.OnsetTime	stim1.OnsetToOnsetTime	stim1.RESP	stim1.RT	stim1.RTTime	stim2.ACC	stim2.CRESP
大创GO-NOGO	1	1	<?xml version="1.0"?>\n<Clock xmlns:dt="urn:schemas-microsoft-com:datatypes"><Description dt:dt="string">E-Prime Primary Realtime Clock</Description><StartTime><Timestamp dt:dt="int">0</Timestamp><DateUtc dt:dt="string">2021-12-17T01:46:23Z</DateUtc></StartTime><FrequencyChanges><FrequencyChange><Frequency dt:dt="r8">10000000</Frequency><Timestamp dt:dt="r8">583939301381</Timestamp><Current dt:dt…	60.007	1.0.0.33	1	-175485389	2.0.10.182	12-17-2021	2021-12-17 01:46:23	09:46:23	2.0.10.92	1	affpro	WordList	1	1	1	1		NULL	5	NULL	NULL	NULL	NULL	NULL	NULL	NULL	2	1	1	NULL	NULL	NULL	pra1	practiceList1	抗虫害棉花+不成熟的	1		1	0	56597	1034		0	0	NULL	NULL
大创GO-NOGO	1	1	<?xml version="1.0"?>\n<Clock xmlns:dt="urn:schemas-microsoft-com:datatypes"><Description dt:dt="string">E-Prime Primary Realtime Clock</Description><StartTime><Timestamp dt:dt="int">0</Timestamp><DateUtc dt:dt="string">2021-12-17T01:46:23Z</DateUtc></StartTime><FrequencyChanges><FrequencyChange><Frequency dt:dt="r8">10000000</Frequency><Timestamp dt:dt="r8">583939301381</Timestamp><Current dt:dt…	60.007	1.0.0.33	1	-175485389	2.0.10.182	12-17-2021	2021-12-17 01:46:23	09:46:23	2.0.10.92	1	affpro	WordList	1	1	1	2		NULL	6	NULL	NULL	NULL	NULL	NULL	NULL	NULL	2	1	2	NULL	NULL	NULL	pra1	practiceList1	抗虫害棉花+高风险的	1		0	0	58347	1017		0	0	NULL	NULL
大创GO-NOGO	1	1	<?xml version="1.0"?>\n<Clock xmlns:dt="urn:schemas-microsoft-com:datatypes"><Description dt:dt="string">E-Prime Primary Realtime Clock</Description><StartTime><Timestamp dt:dt="int">0</Timestamp><DateUtc dt:dt="string">2021-12-17T01:46:23Z</DateUtc></StartTime><FrequencyChanges><FrequencyChange><Frequency dt:dt="r8">10000000</Frequency><Timestamp dt:dt="r8">583939301381</Timestamp><Current dt:dt…	60.007	1.0.0.33	1	-175485389	2.0.10.182	12-17-2021	2021-12-17 01:46:23	09:46:23	2.0.10.92	1	affpro	WordList	1	1	1	3		NULL	9	NULL	NULL	NULL	NULL	NULL	NULL	NULL	2	2	3	NULL	NULL	NULL	pra1	practiceList1	转基因大豆+不成熟的	1		0	0	60081	1016		0	0	NULL	NULL
大创GO-NOGO	1	1	<?xml version="1.0"?>\n<Clock xmlns:dt="urn:schemas-microsoft-com:datatypes"><Description dt:dt="string">E-Prime Primary Realtime Clock</Description><StartTime><Timestamp dt:dt="int">0</Timestamp><DateUtc dt:dt="string">2021-12-17T01:46:23Z</DateUtc></StartTime><FrequencyChanges><FrequencyChange><Frequency dt:dt="r8">10000000</Frequency><Timestamp dt:dt="r8">583939301381</Timestamp><Current dt:dt…	60.007	1.0.0.33	1	-175485389	2.0.10.182	12-17-2021	2021-12-17 01:46:23	09:46:23	2.0.10.92	1	affpro	WordList	1	1	1	4	f	NULL	NULL	NULL	NULL	NULL	11	NULL	NULL	NULL	1	2	4	NULL	NULL	NULL	pra1	practiceList1	转基因大豆+高科技的	1	f	0	0	61814	0	f	514	62328	NULL	NULL
大创GO-NOGO	1	1	<?xml version="1.0"?>\n<Clock xmlns:dt="urn:schemas-microsoft-com:datatypes"><Description dt:dt="string">E-Prime Primary Realtime Clock</Description><StartTime><Timestamp dt:dt="int">0</Timestamp><DateUtc dt:dt="string">2021-12-17T01:46:23Z</DateUtc></StartTime><FrequencyChanges><FrequencyChange><Frequency dt:dt="r8">10000000</Frequency><Timestamp dt:dt="r8">583939301381</Timestamp><Current dt:dt…	60.007	1.0.0.33	1	-175485389	2.0.10.182	12-17-2021	2021-12-17 01:46:23	09:46:23	2.0.10.92	1	affpro	WordList	1	1	1	5		NULL	2	NULL	NULL	NULL	NULL	NULL	NULL	NULL	2	3	5	NULL	NULL	NULL	pra1	practiceList1	转基因食物+高风险的	1		0	0	63147	1017		0	0	NULL	NULL
大创GO-NOGO	1	1	<?xml version="1.0"?>\n<Clock xmlns:dt="urn:schemas-microsoft-com:datatypes"><Description dt:dt="string">E-Prime Primary Realtime Clock</Description><StartTime><Timestamp dt:dt="int">0</Timestamp><DateUtc dt:dt="string">2021-12-17T01:46:23Z</DateUtc></StartTime><FrequencyChanges><FrequencyChange><Frequency dt:dt="r8">10000000</Frequency><Timestamp dt:dt="r8">583939301381</Timestamp><Current dt:dt…	60.007	1.0.0.33	1	-175485389	2.0.10.182	12-17-2021	2021-12-17 01:46:23	09:46:23	2.0.10.92	1	affpro	WordList	1	1	1	6	f	NULL	NULL	NULL	NULL	NULL	1	NULL	NULL	NULL	1	3	6	NULL	NULL	NULL	pra1	practiceList1	转基因食物+科学的	1	f	0	0	64881	0	f	469	65350	NULL	NULL
大创GO-NOGO	1	1	<?xml version="1.0"?>\n<Clock xmlns:dt="urn:schemas-microsoft-com:datatypes"><Description dt:dt="string">E-Prime Primary Realtime Clock</Description><StartTime><Timestamp dt:dt="int">0</Timestamp><DateUtc dt:dt="string">2021-12-17T01:46:23Z</DateUtc></StartTime><FrequencyChanges><FrequencyChange><Frequency dt:dt="r8">10000000</Frequency><Timestamp dt:dt="r8">583939301381</Timestamp><Current dt:dt…	60.007	1.0.0.33	1	-175485389	2.0.10.182	12-17-2021	2021-12-17 01:46:23	09:46:23	2.0.10.92	1	affpro	WordList	1	1	1	7	f	NULL	NULL	NULL	NULL	NULL	8	NULL	NULL	NULL	1	4	7	NULL	NULL	NULL	pra1	practiceList1	抗虫害棉花+创新的	1	f	0	0	66081	0	f	630	66711	NULL	NULL
大创GO-NOGO	1	1	<?xml version="1.0"?>\n<Clock xmlns:dt="urn:schemas-microsoft-com:datatypes"><Description dt:dt="string">E-Prime Primary Realtime Clock</Description><StartTime><Timestamp dt:dt="int">0</Timestamp><DateUtc dt:dt="string">2021-12-17T01:46:23Z</DateUtc></StartTime><FrequencyChanges><FrequencyChange><Frequency dt:dt="r8">10000000</Frequency><Timestamp dt:dt="r8">583939301381</Timestamp><Current dt:dt…	60.007	1.0.0.33	1	-175485389	2.0.10.182	12-17-2021	2021-12-17 01:46:23	09:46:23	2.0.10.92	1	affpro	WordList	1	1	1	8	f	NULL	NULL	NULL	NULL	NULL	15	NULL	NULL	NULL	1	4	8	NULL	NULL	NULL	pra1	practiceList1	动物转基因+高科技的	1	f	0	0	67447	0	f	591	68038	NULL	NULL
大创GO-NOGO	1	1	<?xml version="1.0"?>\n<Clock xmlns:dt="urn:schemas-microsoft-com:datatypes"><Description dt:dt="string">E-Prime Primary Realtime Clock</Description><StartTime><Timestamp dt:dt="int">0</Timestamp><DateUtc dt:dt="string">2021-12-17T01:46:23Z</DateUtc></StartTime><FrequencyChanges><FrequencyChange><Frequency dt:dt="r8">10000000</Frequency><Timestamp dt:dt="r8">583939301381</Timestamp><Current dt:dt…	60.007	1.0.0.33	1	-175485389	2.0.10.182	12-17-2021	2021-12-17 01:46:23	09:46:23	2.0.10.92	1	affpro	WordList	1	1	1	9		NULL	11	NULL	NULL	NULL	NULL	NULL	NULL	NULL	2	5	9	NULL	NULL	NULL	pra1	practiceList1	转基因大豆+非天然的	0		0	0	68781	0	f	590	69371	NULL	NULL
大创GO-NOGO	1	1	<?xml version="1.0"?>\n<Clock xmlns:dt="urn:schemas-microsoft-com:datatypes"><Description dt:dt="string">E-Prime Primary Realtime Clock</Description><StartTime><Timestamp dt:dt="int">0</Timestamp><DateUtc dt:dt="string">2021-12-17T01:46:23Z</DateUtc></StartTime><FrequencyChanges><FrequencyChange><Frequency dt:dt="r8">10000000</Frequency><Timestamp dt:dt="r8">583939301381</Timestamp><Current dt:dt…	60.007	1.0.0.33	1	-175485389	2.0.10.182	12-17-2021	2021-12-17 01:46:23	09:46:23	2.0.10.92	1	affpro	WordList	1	1	1	10	f	NULL	NULL	NULL	NULL	NULL	7	NULL	NULL	NULL	1	5	10	NULL	NULL	NULL	pra1	practiceList1	抗虫害棉花+高科技的	1	f	0	0	70114	0	f	625	70739	NULL	NULL
大创GO-NOGO	1	1	<?xml version="1.0"?>\n<Clock xmlns:dt="urn:schemas-microsoft-com:datatypes"><Description dt:dt="string">E-Prime Primary Realtime Clock</Description><StartTime><Timestamp dt:dt="int">0</Timestamp><DateUtc dt:dt="string">2021-12-17T01:46:23Z</DateUtc></StartTime><FrequencyChanges><FrequencyChange><Frequency dt:dt="r8">10000000</Frequency><Timestamp dt:dt="r8">583939301381</Timestamp><Current dt:dt…	60.007	1.0.0.33	1	-175485389	2.0.10.182	12-17-2021	2021-12-17 01:46:23	09:46:23	2.0.10.92	1	affpro	WordList	1	1	1	11	f	NULL	NULL	NULL	NULL	NULL	10	NULL	NULL	NULL	1	6	11	NULL	NULL	NULL	pra1	practiceList1	转基因大豆+高产的	1	f	1	0	71480	0	f	585	72065	NULL	NULL
大创GO-NOGO	1	1	<?xml version="1.0"?>\n<Clock xmlns:dt="urn:schemas-microsoft-com:datatypes"><Description dt:dt="string">E-Prime Primary Realtime Clock</Description><StartTime><Timestamp dt:dt="int">0</Timestamp><DateUtc dt:dt="string">2021-12-17T01:46:23Z</DateUtc></StartTime><FrequencyChanges><FrequencyChange><Frequency dt:dt="r8">10000000</Frequency><Timestamp dt:dt="r8">583939301381</Timestamp><Current dt:dt…	60.007	1.0.0.33	1	-175485389	2.0.10.182	12-17-2021	2021-12-17 01:46:23	09:46:23	2.0.10.92	1	affpro	WordList	1	1	1	12		NULL	12	NULL	NULL	NULL	NULL	NULL	NULL	NULL	2	6	12	NULL	NULL	NULL	pra1	practiceList1	转基因大豆+有争议的	0		0	0	72797	0	f	769	73566	NULL	NULL
大创GO-NOGO	1	1	<?xml version="1.0"?>\n<Clock xmlns:dt="urn:schemas-microsoft-com:datatypes"><Description dt:dt="string">E-Prime Primary Realtime Clock</Description><StartTime><Timestamp dt:dt="int">0</Timestamp><DateUtc dt:dt="string">2021-12-17T01:46:23Z</DateUtc></StartTime><FrequencyChanges><FrequencyChange><Frequency dt:dt="r8">10000000</Frequency><Timestamp dt:dt="r8">583939301381</Timestamp><Current dt:dt…	60.007	1.0.0.33	1	-175485389	2.0.10.182	12-17-2021	2021-12-17 01:46:23	09:46:23	2.0.10.92	1	affpro	WordList	1	1	1	13		NULL	16	NULL	NULL	NULL	NULL	NULL	NULL	NULL	2	7	13	NULL	NULL	NULL	pra1	practiceList1	动物转基因+有争议的	0		0	0	74297	0	f	810	75107	NULL	NULL
大创GO-NOGO	1	1	<?xml version="1.0"?>\n<Clock xmlns:dt="urn:schemas-microsoft-com:datatypes"><Description dt:dt="string">E-Prime Primary Realtime Clock</Description><StartTime><Timestamp dt:dt="int">0</Timestamp><DateUtc dt:dt="string">2021-12-17T01:46:23Z</DateUtc></StartTime><FrequencyChanges><FrequencyChange><Frequency dt:dt="r8">10000000</Frequency><Timestamp dt:dt="r8">583939301381</Timestamp><Current dt:dt…	60.007	1.0.0.33	1	-175485389	2.0.10.182	12-17-2021	2021-12-17 01:46:23	09:46:23	2.0.10.92	1	affpro	WordList	1	1	1	14	f	NULL	NULL	NULL	NULL	NULL	13	NULL	NULL	NULL	1	7	14	NULL	NULL	NULL	pra1	practiceList1	动物转基因+科学的	1	f	0	0	75847	0	f	672	76519	NULL	NULL
大创GO-NOGO	1	1	<?xml version="1.0"?>\n<Clock xmlns:dt="urn:schemas-microsoft-com:datatypes"><Description dt:dt="string">E-Prime Primary Realtime Clock</Description><StartTime><Timestamp dt:dt="int">0</Timestamp><DateUtc dt:dt="string">2021-12-17T01:46:23Z</DateUtc></StartTime><FrequencyChanges><FrequencyChange><Frequency dt:dt="r8">10000000</Frequency><Timestamp dt:dt="r8">583939301381</Timestamp><Current dt:dt…	60.007	1.0.0.33	1	-175485389	2.0.10.182	12-17-2021	2021-12-17 01:46:23	09:46:23	2.0.10.92	1	affpro	WordList	1	1	1	15		NULL	8	NULL	NULL	NULL	NULL	NULL	NULL	NULL	2	8	15	NULL	NULL	NULL	pra1	practiceList1	抗虫害棉花+有争议的	1		0	0	77264	1016		0	0	NULL	NULL
大创GO-NOGO	1	1	<?xml version="1.0"?>\n<Clock xmlns:dt="urn:schemas-microsoft-com:datatypes"><Description dt:dt="string">E-Prime Primary Realtime Clock</Description><StartTime><Timestamp dt:dt="int">0</Timestamp><DateUtc dt:dt="string">2021-12-17T01:46:23Z</DateUtc></StartTime><FrequencyChanges><FrequencyChange><Frequency dt:dt="r8">10000000</Frequency><Timestamp dt:dt="r8">583939301381</Timestamp><Current dt:dt…	60.007	1.0.0.33	1	-175485389	2.0.10.182	12-17-2021	2021-12-17 01:46:23	09:46:23	2.0.10.92	1	affpro	WordList	1	1	1	16		NULL	14	NULL	NULL	NULL	NULL	NULL	NULL	NULL	2	8	16	NULL	NULL	NULL	pra1	practiceList1	动物转基因+高风险的	1		0	0	78997	1017		0	0	NULL	NULL
大创GO-NOGO	1	1	<?xml version="1.0"?>\n<Clock xmlns:dt="urn:schemas-microsoft-com:datatypes"><Description dt:dt="string">E-Prime Primary Realtime Clock</Description><StartTime><Timestamp dt:dt="int">0</Timestamp><DateUtc dt:dt="string">2021-12-17T01:46:23Z</DateUtc></StartTime><FrequencyChanges><FrequencyChange><Frequency dt:dt="r8">10000000</Frequency><Timestamp dt:dt="r8">583939301381</Timestamp><Current dt:dt…	60.007	1.0.0.33	1	-175485389	2.0.10.182	12-17-2021	2021-12-17 01:46:23	09:46:23	2.0.10.92	1	affpro	WordList	1	1	1	17		NULL	13	NULL	NULL	NULL	NULL	NULL	NULL	NULL	2	9	17	NULL	NULL	NULL	pra1	practiceList1	动物转基因+不成熟的	1		0	0	80730	1017		0	0	NULL	NULL
大创GO-NOGO	1	1	<?xml version="1.0"?>\n<Clock xmlns:dt="urn:schemas-microsoft-com:datatypes"><Description dt:dt="string">E-Prime Primary Realtime Clock</Description><StartTime><Timestamp dt:dt="int">0</Timestamp><DateUtc dt:dt="string">2021-12-17T01:46:23Z</DateUtc></StartTime><FrequencyChanges><FrequencyChange><Frequency dt:dt="r8">10000000</Frequency><Timestamp dt:dt="r8">583939301381</Timestamp><Current dt:dt…	60.007	1.0.0.33	1	-175485389	2.0.10.182	12-17-2021	2021-12-17 01:46:23	09:46:23	2.0.10.92	1	affpro	WordList	1	1	1	18	f	NULL	NULL	NULL	NULL	NULL	14	NULL	NULL	NULL	1	9	18	NULL	NULL	NULL	pra1	practiceList1	动物转基因+高产的	1	f	0	0	82464	0	f	521	82985	NULL	NULL
大创GO-NOGO	1	1	<?xml version="1.0"?>\n<Clock xmlns:dt="urn:schemas-microsoft-com:datatypes"><Description dt:dt="string">E-Prime Primary Realtime Clock</Description><StartTime><Timestamp dt:dt="int">0</Timestamp><DateUtc dt:dt="string">2021-12-17T01:46:23Z</DateUtc></StartTime><FrequencyChanges><FrequencyChange><Frequency dt:dt="r8">10000000</Frequency><Timestamp dt:dt="r8">583939301381</Timestamp><Current dt:dt…	60.007	1.0.0.33	1	-175485389	2.0.10.182	12-17-2021	2021-12-17 01:46:23	09:46:23	2.0.10.92	1	affpro	WordList	1	1	1	19	f	NULL	NULL	NULL	NULL	NULL	6	NULL	NULL	NULL	1	10	19	NULL	NULL	NULL	pra1	practiceList1	抗虫害棉花+高产的	1	f	0	0	83714	0	f	609	84323	NULL	NULL
大创GO-NOGO	1	1	<?xml version="1.0"?>\n<Clock xmlns:dt="urn:schemas-microsoft-com:datatypes"><Description dt:dt="string">E-Prime Primary Realtime Clock</Description><StartTime><Timestamp dt:dt="int">0</Timestamp><DateUtc dt:dt="string">2021-12-17T01:46:23Z</DateUtc></StartTime><FrequencyChanges><FrequencyChange><Frequency dt:dt="r8">10000000</Frequency><Timestamp dt:dt="r8">583939301381</Timestamp><Current dt:dt…	60.007	1.0.0.33	1	-175485389	2.0.10.182	12-17-2021	2021-12-17 01:46:23	09:46:23	2.0.10.92	1	affpro	WordList	1	1	1	20	f	NULL	NULL	NULL	NULL	NULL	5	NULL	NULL	NULL	1	10	20	NULL	NULL	NULL	pra1	practiceList1	抗虫害棉花+科学的	1	f	0	0	85064	0	f	512	85576	NULL	NULL
大创GO-NOGO	1	1	<?xml version="1.0"?>\n<Clock xmlns:dt="urn:schemas-microsoft-com:datatypes"><Description dt:dt="string">E-Prime Primary Realtime Clock</Description><StartTime><Timestamp dt:dt="int">0</Timestamp><DateUtc dt:dt="string">2021-12-17T01:46:23Z</DateUtc></StartTime><FrequencyChanges><FrequencyChange><Frequency dt:dt="r8">10000000</Frequency><Timestamp dt:dt="r8">583939301381</Timestamp><Current dt:dt…	60.007	1.0.0.33	1	-175485389	2.0.10.182	12-17-2021	2021-12-17 01:46:23	09:46:23	2.0.10.92	1	affpro	WordList	1	1	1	21	f	NULL	NULL	NULL	NULL	NULL	12	NULL	NULL	NULL	1	11	21	NULL	NULL	NULL	pra1	practiceList1	转基因大豆+创新的	1	f	0	0	86314	0	f	509	86823	NULL	NULL
大创GO-NOGO	1	1	<?xml version="1.0"?>\n<Clock xmlns:dt="urn:schemas-microsoft-com:datatypes"><Description dt:dt="string">E-Prime Primary Realtime Clock</Description><StartTime><Timestamp dt:dt="int">0</Timestamp><DateUtc dt:dt="string">2021-12-17T01:46:23Z</DateUtc></StartTime><FrequencyChanges><FrequencyChange><Frequency dt:dt="r8">10000000</Frequency><Timestamp dt:dt="r8">583939301381</Timestamp><Current dt:dt…	60.007	1.0.0.33	1	-175485389	2.0.10.182	12-17-2021	2021-12-17 01:46:23	09:46:23	2.0.10.92	1	affpro	WordList	1	1	1	22		NULL	7	NULL	NULL	NULL	NULL	NULL	NULL	NULL	2	11	22	NULL	NULL	NULL	pra1	practiceList1	抗虫害棉花+非天然的	1		0	0	87564	1016		0	0	NULL	NULL
大创GO-NOGO	1	1	<?xml version="1.0"?>\n<Clock xmlns:dt="urn:schemas-microsoft-com:datatypes"><Description dt:dt="string">E-Prime Primary Realtime Clock</Description><StartTime><Timestamp dt:dt="int">0</Timestamp><DateUtc dt:dt="string">2021-12-17T01:46:23Z</DateUtc></StartTime><FrequencyChanges><FrequencyChange><Frequency dt:dt="r8">10000000</Frequency><Timestamp dt:dt="r8">583939301381</Timestamp><Current dt:dt…	60.007	1.0.0.33	1	-175485389	2.0.10.182	12-17-2021	2021-12-17 01:46:23	09:46:23	2.0.10.92	1	affpro	WordList	1	1	1	23	f	NULL	NULL	NULL	NULL	NULL	2	NULL	NULL	NULL	1	12	23	NULL	NULL	NULL	pra1	practiceList1	转基因食物+高产的	1	f	0	0	89297	0	f	528	89825	NULL	NULL
大创GO-NOGO	1	1	<?xml version="1.0"?>\n<Clock xmlns:dt="urn:schemas-microsoft-com:datatypes"><Description dt:dt="string">E-Prime Primary Realtime Clock</Description><StartTime><Timestamp dt:dt="int">0</Timestamp><DateUtc dt:dt="string">2021-12-17T01:46:23Z</DateUtc></StartTime><FrequencyChanges><FrequencyChange><Frequency dt:dt="r8">10000000</Frequency><Timestamp dt:dt="r8">583939301381</Timestamp><Current dt:dt…	60.007	1.0.0.33	1	-175485389	2.0.10.182	12-17-2021	2021-12-17 01:46:23	09:46:23	2.0.10.92	1	affpro	WordList	1	1	1	24	f	NULL	NULL	NULL	NULL	NULL	9	NULL	NULL	NULL	1	12	24	NULL	NULL	NULL	pra1	practiceList1	转基因大豆+科学的	1	f	0	0	90564	0	f	515	91079	NULL	NULL
大创GO-NOGO	1	1	<?xml version="1.0"?>\n<Clock xmlns:dt="urn:schemas-microsoft-com:datatypes"><Description dt:dt="string">E-Prime Primary Realtime Clock</Description><StartTime><Timestamp dt:dt="int">0</Timestamp><DateUtc dt:dt="string">2021-12-17T01:46:23Z</DateUtc></StartTime><FrequencyChanges><FrequencyChange><Frequency dt:dt="r8">10000000</Frequency><Timestamp dt:dt="r8">583939301381</Timestamp><Current dt:dt…	60.007	1.0.0.33	1	-175485389	2.0.10.182	12-17-2021	2021-12-17 01:46:23	09:46:23	2.0.10.92	1	affpro	WordList	1	1	1	25		NULL	NULL	15	NULL	NULL	NULL	NULL	NULL	NULL	NULL	NULL	NULL	NULL	NULL	NULL	pra2	taskList1	动物转基因+非天然的	NULL	NULL	NULL	NULL	NULL	NULL	NULL	NULL	NULL	1
大创GO-NOGO	1	1	<?xml version="1.0"?>\n<Clock xmlns:dt="urn:schemas-microsoft-com:datatypes"><Description dt:dt="string">E-Prime Primary Realtime Clock</Description><StartTime><Timestamp dt:dt="int">0</Timestamp><DateUtc dt:dt="string">2021-12-17T01:46:23Z</DateUtc></StartTime><FrequencyChanges><FrequencyChange><Frequency dt:dt="r8">10000000</Frequency><Timestamp dt:dt="r8">583939301381</Timestamp><Current dt:dt…	60.007	1.0.0.33	1	-175485389	2.0.10.182	12-17-2021	2021-12-17 01:46:23	09:46:23	2.0.10.92	1	affpro	WordList	1	1	1	26	f	NULL	NULL	NULL	NULL	NULL	NULL	1	NULL	NULL	NULL	NULL	NULL	NULL	NULL	NULL	pra2	taskList1	转基因食物+科学的	NULL	NULL	NULL	NULL	NULL	NULL	NULL	NULL	NULL	1	f
大创GO-NOGO	1	1	<?xml version="1.0"?>\n<Clock xmlns:dt="urn:schemas-microsoft-com:datatypes"><Description dt:dt="string">E-Prime Primary Realtime Clock</Description><StartTime><Timestamp dt:dt="int">0</Timestamp><DateUtc dt:dt="string">2021-12-17T01:46:23Z</DateUtc></StartTime><FrequencyChanges><FrequencyChange><Frequency dt:dt="r8">10000000</Frequency><Timestamp dt:dt="r8">583939301381</Timestamp><Current dt:dt…	60.007	1.0.0.33	1	-175485389	2.0.10.182	12-17-2021	2021-12-17 01:46:23	09:46:23	2.0.10.92	1	affpro	WordList	1	1	1	27		NULL	NULL	16	NULL	NULL	NULL	NULL	NULL	NULL	NULL	NULL	NULL	NULL	NULL	NULL	pra2	taskList1	动物转基因+有争议的	NULL	NULL	NULL	NULL	NULL	NULL	NULL	NULL	NULL	1
大创GO-NOGO	1	1	<?xml version="1.0"?>\n<Clock xmlns:dt="urn:schemas-microsoft-com:datatypes"><Description dt:dt="string">E-Prime Primary Realtime Clock</Description><StartTime><Timestamp dt:dt="int">0</Timestamp><DateUtc dt:dt="string">2021-12-17T01:46:23Z</DateUtc></StartTime><FrequencyChanges><FrequencyChange><Frequency dt:dt="r8">10000000</Frequency><Timestamp dt:dt="r8">583939301381</Timestamp><Current dt:dt…	60.007	1.0.0.33	1	-175485389	2.0.10.182	12-17-2021	2021-12-17 01:46:23	09:46:23	2.0.10.92	1	affpro	WordList	1	1	1	28	f	NULL	NULL	NULL	NULL	NULL	NULL	7	NULL	NULL	NULL	NULL	NULL	NULL	NULL	NULL	pra2	taskList1	抗虫害棉花+高科技的	NULL	NULL	NULL	NULL	NULL	NULL	NULL	NULL	NULL	1	f
大创GO-NOGO	1	1	<?xml version="1.0"?>\n<Clock xmlns:dt="urn:schemas-microsoft-com:datatypes"><Description dt:dt="string">E-Prime Primary Realtime Clock</Description><StartTime><Timestamp dt:dt="int">0</Timestamp><DateUtc dt:dt="string">2021-12-17T01:46:23Z</DateUtc></StartTime><FrequencyChanges><FrequencyChange><Frequency dt:dt="r8">10000000</Frequency><Timestamp dt:dt="r8">583939301381</Timestamp><Current dt:dt…	60.007	1.0.0.33	1	-175485389	2.0.10.182	12-17-2021	2021-12-17 01:46:23	09:46:23	2.0.10.92	1	affpro	WordList	1	1	1	29	f	NULL	NULL	NULL	NULL	NULL	NULL	6	NULL	NULL	NULL	NULL	NULL	NULL	NULL	NULL	pra2	taskList1	抗虫害棉花+高产的	NULL	NULL	NULL	NULL	NULL	NULL	NULL	NULL	NULL	1	f
大创GO-NOGO	1	1	<?xml version="1.0"?>\n<Clock xmlns:dt="urn:schemas-microsoft-com:datatypes"><Description dt:dt="string">E-Prime Primary Realtime Clock</Description><StartTime><Timestamp dt:dt="int">0</Timestamp><DateUtc dt:dt="string">2021-12-17T01:46:23Z</DateUtc></StartTime><FrequencyChanges><FrequencyChange><Frequency dt:dt="r8">10000000</Frequency><Timestamp dt:dt="r8">583939301381</Timestamp><Current dt:dt…	60.007	1.0.0.33	1	-175485389	2.0.10.182	12-17-2021	2021-12-17 01:46:23	09:46:23	2.0.10.92	1	affpro	WordList	1	1	1	30		NULL	NULL	7	NULL	NULL	NULL	NULL	NULL	NULL	NULL	NULL	NULL	NULL	NULL	NULL	pra2	taskList1	抗虫害棉花+非天然的	NULL	NULL	NULL	NULL	NULL	NULL	NULL	NULL	NULL	1
大创GO-NOGO	1	1	<?xml version="1.0"?>\n<Clock xmlns:dt="urn:schemas-microsoft-com:datatypes"><Description dt:dt="string">E-Prime Primary Realtime Clock</Description><StartTime><Timestamp dt:dt="int">0</Timestamp><DateUtc dt:dt="string">2021-12-17T01:46:23Z</DateUtc></StartTime><FrequencyChanges><FrequencyChange><Frequency dt:dt="r8">10000000</Frequency><Timestamp dt:dt="r8">583939301381</Timestamp><Current dt:dt…	60.007	1.0.0.33	1	-175485389	2.0.10.182	12-17-2021	2021-12-17 01:46:23	09:46:23	2.0.10.92	1	affpro	WordList	1	1	1	31		NULL	NULL	10	NULL	NULL	NULL	NULL	NULL	NULL	NULL	NULL	NULL	NULL	NULL	NULL	pra2	taskList1	转基因大豆+高风险的	NULL	NULL	NULL	NULL	NULL	NULL	NULL	NULL	NULL	1
大创GO-NOGO	1	1	<?xml version="1.0"?>\n<Clock xmlns:dt="urn:schemas-microsoft-com:datatypes"><Description dt:dt="string">E-Prime Primary Realtime Clock</Description><StartTime><Timestamp dt:dt="int">0</Timestamp><DateUtc dt:dt="string">2021-12-17T01:46:23Z</DateUtc></StartTime><FrequencyChanges><FrequencyChange><Frequency dt:dt="r8">10000000</Frequency><Timestamp dt:dt="r8">583939301381</Timestamp><Current dt:dt…	60.007	1.0.0.33	1	-175485389	2.0.10.182	12-17-2021	2021-12-17 01:46:23	09:46:23	2.0.10.92	1	affpro	WordList	1	1	1	32	f	NULL	NULL	NULL	NULL	NULL	NULL	10	NULL	NULL	NULL	NULL	NULL	NULL	NULL	NULL	pra2	taskList1	转基因大豆+高产的	NULL	NULL	NULL	NULL	NULL	NULL	NULL	NULL	NULL	1	f
大创GO-NOGO	1	1	<?xml version="1.0"?>\n<Clock xmlns:dt="urn:schemas-microsoft-com:datatypes"><Description dt:dt="string">E-Prime Primary Realtime Clock</Description><StartTime><Timestamp dt:dt="int">0</Timestamp><DateUtc dt:dt="string">2021-12-17T01:46:23Z</DateUtc></StartTime><FrequencyChanges><FrequencyChange><Frequency dt:dt="r8">10000000</Frequency><Timestamp dt:dt="r8">583939301381</Timestamp><Current dt:dt…	60.007	1.0.0.33	1	-175485389	2.0.10.182	12-17-2021	2021-12-17 01:46:23	09:46:23	2.0.10.92	1	affpro	WordList	1	1	1	33		NULL	NULL	14	NULL	NULL	NULL	NULL	NULL	NULL	NULL	NULL	NULL	NULL	NULL	NULL	pra2	taskList1	动物转基因+高风险的	NULL	NULL	NULL	NULL	NULL	NULL	NULL	NULL	NULL	1
大创GO-NOGO	1	1	<?xml version="1.0"?>\n<Clock xmlns:dt="urn:schemas-microsoft-com:datatypes"><Description dt:dt="string">E-Prime Primary Realtime Clock</Description><StartTime><Timestamp dt:dt="int">0</Timestamp><DateUtc dt:dt="string">2021-12-17T01:46:23Z</DateUtc></StartTime><FrequencyChanges><FrequencyChange><Frequency dt:dt="r8">10000000</Frequency><Timestamp dt:dt="r8">583939301381</Timestamp><Current dt:dt…	60.007	1.0.0.33	1	-175485389	2.0.10.182	12-17-2021	2021-12-17 01:46:23	09:46:23	2.0.10.92	1	affpro	WordList	1	1	1	34	f	NULL	NULL	NULL	NULL	NULL	NULL	12	NULL	NULL	NULL	NULL	NULL	NULL	NULL	NULL	pra2	taskList1	转基因大豆+创新的	NULL	NULL	NULL	NULL	NULL	NULL	NULL	NULL	NULL	1	f
大创GO-NOGO	1	1	<?xml version="1.0"?>\n<Clock xmlns:dt="urn:schemas-microsoft-com:datatypes"><Description dt:dt="string">E-Prime Primary Realtime Clock</Description><StartTime><Timestamp dt:dt="int">0</Timestamp><DateUtc dt:dt="string">2021-12-17T01:46:23Z</DateUtc></StartTime><FrequencyChanges><FrequencyChange><Frequency dt:dt="r8">10000000</Frequency><Timestamp dt:dt="r8">583939301381</Timestamp><Current dt:dt…	60.007	1.0.0.33	1	-175485389	2.0.10.182	12-17-2021	2021-12-17 01:46:23	09:46:23	2.0.10.92	1	affpro	WordList	1	1	1	35		NULL	NULL	8	NULL	NULL	NULL	NULL	NULL	NULL	NULL	NULL	NULL	NULL	NULL	NULL	pra2	taskList1	抗虫害棉花+有争议的	NULL	NULL	NULL	NULL	NULL	NULL	NULL	NULL	NULL	1
大创GO-NOGO	1	1	<?xml version="1.0"?>\n<Clock xmlns:dt="urn:schemas-microsoft-com:datatypes"><Description dt:dt="string">E-Prime Primary Realtime Clock</Description><StartTime><Timestamp dt:dt="int">0</Timestamp><DateUtc dt:dt="string">2021-12-17T01:46:23Z</DateUtc></StartTime><FrequencyChanges><FrequencyChange><Frequency dt:dt="r8">10000000</Frequency><Timestamp dt:dt="r8">583939301381</Timestamp><Current dt:dt…	60.007	1.0.0.33	1	-175485389	2.0.10.182	12-17-2021	2021-12-17 01:46:23	09:46:23	2.0.10.92	1	affpro	WordList	1	1	1	36		NULL	NULL	4	NULL	NULL	NULL	NULL	NULL	NULL	NULL	NULL	NULL	NULL	NULL	NULL	pra2	taskList1	转基因食物+有争议的	NULL	NULL	NULL	NULL	NULL	NULL	NULL	NULL	NULL	1
大创GO-NOGO	1	1	<?xml version="1.0"?>\n<Clock xmlns:dt="urn:schemas-microsoft-com:datatypes"><Description dt:dt="string">E-Prime Primary Realtime Clock</Description><StartTime><Timestamp dt:dt="int">0</Timestamp><DateUtc dt:dt="string">2021-12-17T01:46:23Z</DateUtc></StartTime><FrequencyChanges><FrequencyChange><Frequency dt:dt="r8">10000000</Frequency><Timestamp dt:dt="r8">583939301381</Timestamp><Current dt:dt…	60.007	1.0.0.33	1	-175485389	2.0.10.182	12-17-2021	2021-12-17 01:46:23	09:46:23	2.0.10.92	1	affpro	WordList	1	1	1	37		NULL	NULL	5	NULL	NULL	NULL	NULL	NULL	NULL	NULL	NULL	NULL	NULL	NULL	NULL	pra2	taskList1	抗虫害棉花+不成熟的	NULL	NULL	NULL	NULL	NULL	NULL	NULL	NULL	NULL	1
大创GO-NOGO	1	1	<?xml version="1.0"?>\n<Clock xmlns:dt="urn:schemas-microsoft-com:datatypes"><Description dt:dt="string">E-Prime Primary Realtime Clock</Description><StartTime><Timestamp dt:dt="int">0</Timestamp><DateUtc dt:dt="string">2021-12-17T01:46:23Z</DateUtc></StartTime><FrequencyChanges><FrequencyChange><Frequency dt:dt="r8">10000000</Frequency><Timestamp dt:dt="r8">583939301381</Timestamp><Current dt:dt…	60.007	1.0.0.33	1	-175485389	2.0.10.182	12-17-2021	2021-12-17 01:46:23	09:46:23	2.0.10.92	1	affpro	WordList	1	1	1	38	f	NULL	NULL	NULL	NULL	NULL	NULL	2	NULL	NULL	NULL	NULL	NULL	NULL	NULL	NULL	pra2	taskList1	转基因食物+高产的	NULL	NULL	NULL	NULL	NULL	NULL	NULL	NULL	NULL	1	f
大创GO-NOGO	1	1	<?xml version="1.0"?>\n<Clock xmlns:dt="urn:schemas-microsoft-com:datatypes"><Description dt:dt="string">E-Prime Primary Realtime Clock</Description><StartTime><Timestamp dt:dt="int">0</Timestamp><DateUtc dt:dt="string">2021-12-17T01:46:23Z</DateUtc></StartTime><FrequencyChanges><FrequencyChange><Frequency dt:dt="r8">10000000</Frequency><Timestamp dt:dt="r8">583939301381</Timestamp><Current dt:dt…	60.007	1.0.0.33	1	-175485389	2.0.10.182	12-17-2021	2021-12-17 01:46:23	09:46:23	2.0.10.92	1	affpro	WordList	1	1	1	39		NULL	NULL	2	NULL	NULL	NULL	NULL	NULL	NULL	NULL	NULL	NULL	NULL	NULL	NULL	pra2	taskList1	转基因食物+高风险的	NULL	NULL	NULL	NULL	NULL	NULL	NULL	NULL	NULL	1
大创GO-NOGO	1	1	<?xml version="1.0"?>\n<Clock xmlns:dt="urn:schemas-microsoft-com:datatypes"><Description dt:dt="string">E-Prime Primary Realtime Clock</Description><StartTime><Timestamp dt:dt="int">0</Timestamp><DateUtc dt:dt="string">2021-12-17T01:46:23Z</DateUtc></StartTime><FrequencyChanges><FrequencyChange><Frequency dt:dt="r8">10000000</Frequency><Timestamp dt:dt="r8">583939301381</Timestamp><Current dt:dt…	60.007	1.0.0.33	1	-175485389	2.0.10.182	12-17-2021	2021-12-17 01:46:23	09:46:23	2.0.10.92	1	affpro	WordList	1	1	1	40	f	NULL	NULL	NULL	NULL	NULL	NULL	8	NULL	NULL	NULL	NULL	NULL	NULL	NULL	NULL	pra2	taskList1	抗虫害棉花+创新的	NULL	NULL	NULL	NULL	NULL	NULL	NULL	NULL	NULL	1	f
大创GO-NOGO	1	1	<?xml version="1.0"?>\n<Clock xmlns:dt="urn:schemas-microsoft-com:datatypes"><Description dt:dt="string">E-Prime Primary Realtime Clock</Description><StartTime><Timestamp dt:dt="int">0</Timestamp><DateUtc dt:dt="string">2021-12-17T01:46:23Z</DateUtc></StartTime><FrequencyChanges><FrequencyChange><Frequency dt:dt="r8">10000000</Frequency><Timestamp dt:dt="r8">583939301381</Timestamp><Current dt:dt…	60.007	1.0.0.33	1	-175485389	2.0.10.182	12-17-2021	2021-12-17 01:46:23	09:46:23	2.0.10.92	1	affpro	WordList	1	1	1	41		NULL	NULL	13	NULL	NULL	NULL	NULL	NULL	NULL	NULL	NULL	NULL	NULL	NULL	NULL	pra2	taskList1	动物转基因+不成熟的	NULL	NULL	NULL	NULL	NULL	NULL	NULL	NULL	NULL	1
大创GO-NOGO	1	1	<?xml version="1.0"?>\n<Clock xmlns:dt="urn:schemas-microsoft-com:datatypes"><Description dt:dt="string">E-Prime Primary Realtime Clock</Description><StartTime><Timestamp dt:dt="int">0</Timestamp><DateUtc dt:dt="string">2021-12-17T01:46:23Z</DateUtc></StartTime><FrequencyChanges><FrequencyChange><Frequency dt:dt="r8">10000000</Frequency><Timestamp dt:dt="r8">583939301381</Timestamp><Current dt:dt…	60.007	1.0.0.33	1	-175485389	2.0.10.182	12-17-2021	2021-12-17 01:46:23	09:46:23	2.0.10.92	1	affpro	WordList	1	1	1	42		NULL	NULL	12	NULL	NULL	NULL	NULL	NULL	NULL	NULL	NULL	NULL	NULL	NULL	NULL	pra2	taskList1	转基因大豆+有争议的	NULL	NULL	NULL	NULL	NULL	NULL	NULL	NULL	NULL	1
大创GO-NOGO	1	1	<?xml version="1.0"?>\n<Clock xmlns:dt="urn:schemas-microsoft-com:datatypes"><Description dt:dt="string">E-Prime Primary Realtime Clock</Description><StartTime><Timestamp dt:dt="int">0</Timestamp><DateUtc dt:dt="string">2021-12-17T01:46:23Z</DateUtc></StartTime><FrequencyChanges><FrequencyChange><Frequency dt:dt="r8">10000000</Frequency><Timestamp dt:dt="r8">583939301381</Timestamp><Current dt:dt…	60.007	1.0.0.33	1	-175485389	2.0.10.182	12-17-2021	2021-12-17 01:46:23	09:46:23	2.0.10.92	1	affpro	WordList	1	1	1	43	f	NULL	NULL	NULL	NULL	NULL	NULL	15	NULL	NULL	NULL	NULL	NULL	NULL	NULL	NULL	pra2	taskList1	动物转基因+高科技的	NULL	NULL	NULL	NULL	NULL	NULL	NULL	NULL	NULL	1	f
大创GO-NOGO	1	1	<?xml version="1.0"?>\n<Clock xmlns:dt="urn:schemas-microsoft-com:datatypes"><Description dt:dt="string">E-Prime Primary Realtime Clock</Description><StartTime><Timestamp dt:dt="int">0</Timestamp><DateUtc dt:dt="string">2021-12-17T01:46:23Z</DateUtc></StartTime><FrequencyChanges><FrequencyChange><Frequency dt:dt="r8">10000000</Frequency><Timestamp dt:dt="r8">583939301381</Timestamp><Current dt:dt…	60.007	1.0.0.33	1	-175485389	2.0.10.182	12-17-2021	2021-12-17 01:46:23	09:46:23	2.0.10.92	1	affpro	WordList	1	1	1	44	f	NULL	NULL	NULL	NULL	NULL	NULL	4	NULL	NULL	NULL	NULL	NULL	NULL	NULL	NULL	pra2	taskList1	转基因食物+创新的	NULL	NULL	NULL	NULL	NULL	NULL	NULL	NULL	NULL	1	f
大创GO-NOGO	1	1	<?xml version="1.0"?>\n<Clock xmlns:dt="urn:schemas-microsoft-com:datatypes"><Description dt:dt="string">E-Prime Primary Realtime Clock</Description><StartTime><Timestamp dt:dt="int">0</Timestamp><DateUtc dt:dt="string">2021-12-17T01:46:23Z</DateUtc></StartTime><FrequencyChanges><FrequencyChange><Frequency dt:dt="r8">10000000</Frequency><Timestamp dt:dt="r8">583939301381</Timestamp><Current dt:dt…	60.007	1.0.0.33	1	-175485389	2.0.10.182	12-17-2021	2021-12-17 01:46:23	09:46:23	2.0.10.92	1	affpro	WordList	1	1	1	45		NULL	NULL	6	NULL	NULL	NULL	NULL	NULL	NULL	NULL	NULL	NULL	NULL	NULL	NULL	pra2	taskList1	抗虫害棉花+高风险的	NULL	NULL	NULL	NULL	NULL	NULL	NULL	NULL	NULL	1
大创GO-NOGO	1	1	<?xml version="1.0"?>\n<Clock xmlns:dt="urn:schemas-microsoft-com:datatypes"><Description dt:dt="string">E-Prime Primary Realtime Clock</Description><StartTime><Timestamp dt:dt="int">0</Timestamp><DateUtc dt:dt="string">2021-12-17T01:46:23Z</DateUtc></StartTime><FrequencyChanges><FrequencyChange><Frequency dt:dt="r8">10000000</Frequency><Timestamp dt:dt="r8">583939301381</Timestamp><Current dt:dt…	60.007	1.0.0.33	1	-175485389	2.0.10.182	12-17-2021	2021-12-17 01:46:23	09:46:23	2.0.10.92	1	affpro	WordList	1	1	1	46		NULL	NULL	11	NULL	NULL	NULL	NULL	NULL	NULL	NULL	NULL	NULL	NULL	NULL	NULL	pra2	taskList1	转基因大豆+非天然的	NULL	NULL	NULL	NULL	NULL	NULL	NULL	NULL	NULL	1
大创GO-NOGO	1	1	<?xml version="1.0"?>\n<Clock xmlns:dt="urn:schemas-microsoft-com:datatypes"><Description dt:dt="string">E-Prime Primary Realtime Clock</Description><StartTime><Timestamp dt:dt="int">0</Timestamp><DateUtc dt:dt="string">2021-12-17T01:46:23Z</DateUtc></StartTime><FrequencyChanges><FrequencyChange><Frequency dt:dt="r8">10000000</Frequency><Timestamp dt:dt="r8">583939301381</Timestamp><Current dt:dt…	60.007	1.0.0.33	1	-175485389	2.0.10.182	12-17-2021	2021-12-17 01:46:23	09:46:23	2.0.10.92	1	affpro	WordList	1	1	1	47	f	NULL	NULL	NULL	NULL	NULL	NULL	13	NULL	NULL	NULL	NULL	NULL	NULL	NULL	NULL	pra2	taskList1	动物转基因+科学的	NULL	NULL	NULL	NULL	NULL	NULL	NULL	NULL	NULL	1	f
大创GO-NOGO	1	1	<?xml version="1.0"?>\n<Clock xmlns:dt="urn:schemas-microsoft-com:datatypes"><Description dt:dt="string">E-Prime Primary Realtime Clock</Description><StartTime><Timestamp dt:dt="int">0</Timestamp><DateUtc dt:dt="string">2021-12-17T01:46:23Z</DateUtc></StartTime><FrequencyChanges><FrequencyChange><Frequency dt:dt="r8">10000000</Frequency><Timestamp dt:dt="r8">583939301381</Timestamp><Current dt:dt…	60.007	1.0.0.33	1	-175485389	2.0.10.182	12-17-2021	2021-12-17 01:46:23	09:46:23	2.0.10.92	1	affpro	WordList	1	1	1	48		NULL	NULL	1	NULL	NULL	NULL	NULL	NULL	NULL	NULL	NULL	NULL	NULL	NULL	NULL	pra2	taskList1	转基因食物+不成熟的	NULL	NULL	NULL	NULL	NULL	NULL	NULL	NULL	NULL	1
大创GO-NOGO	1	1	<?xml version="1.0"?>\n<Clock xmlns:dt="urn:schemas-microsoft-com:datatypes"><Description dt:dt="string">E-Prime Primary Realtime Clock</Description><StartTime><Timestamp dt:dt="int">0</Timestamp><DateUtc dt:dt="string">2021-12-17T01:46:23Z</DateUtc></StartTime><FrequencyChanges><FrequencyChange><Frequency dt:dt="r8">10000000</Frequency><Timestamp dt:dt="r8">583939301381</Timestamp><Current dt:dt…	60.007	1.0.0.33	1	-175485389	2.0.10.182	12-17-2021	2021-12-17 01:46:23	09:46:23	2.0.10.92	1	affpro	WordList	1	1	1	49		NULL	NULL	3	NULL	NULL	NULL	NULL	NULL	NULL	NULL	NULL	NULL	NULL	NULL	NULL	pra2	taskList1	转基因食物+非天然的	NULL	NULL	NULL	NULL	NULL	NULL	NULL	NULL	NULL	1
大创GO-NOGO	1	1	<?xml version="1.0"?>\n<Clock xmlns:dt="urn:schemas-microsoft-com:datatypes"><Description dt:dt="string">E-Prime Primary Realtime Clock</Description><StartTime><Timestamp dt:dt="int">0</Timestamp><DateUtc dt:dt="string">2021-12-17T01:46:23Z</DateUtc></StartTime><FrequencyChanges><FrequencyChange><Frequency dt:dt="r8">10000000</Frequency><Timestamp dt:dt="r8">583939301381</Timestamp><Current dt:dt…	60.007	1.0.0.33	1	-175485389	2.0.10.182	12-17-2021	2021-12-17 01:46:23	09:46:23	2.0.10.92	1	affpro	WordList	1	1	1	50	f	NULL	NULL	NULL	NULL	NULL	NULL	9	NULL	NULL	NULL	NULL	NULL	NULL	NULL	NULL	pra2	taskList1	转基因大豆+科学的	NULL	NULL	NULL	NULL	NULL	NULL	NULL	NULL	NULL	1	f
大创GO-NOGO	1	1	<?xml version="1.0"?>\n<Clock xmlns:dt="urn:schemas-microsoft-com:datatypes"><Description dt:dt="string">E-Prime Primary Realtime Clock</Description><StartTime><Timestamp dt:dt="int">0</Timestamp><DateUtc dt:dt="string">2021-12-17T01:46:23Z</DateUtc></StartTime><FrequencyChanges><FrequencyChange><Frequency dt:dt="r8">10000000</Frequency><Timestamp dt:dt="r8">583939301381</Timestamp><Current dt:dt…	60.007	1.0.0.33	1	-175485389	2.0.10.182	12-17-2021	2021-12-17 01:46:23	09:46:23	2.0.10.92	1	affpro	WordList	1	1	1	51	f	NULL	NULL	NULL	NULL	NULL	NULL	11	NULL	NULL	NULL	NULL	NULL	NULL	NULL	NULL	pra2	taskList1	转基因大豆+高科技的	NULL	NULL	NULL	NULL	NULL	NULL	NULL	NULL	NULL	1	f
大创GO-NOGO	1	1	<?xml version="1.0"?>\n<Clock xmlns:dt="urn:schemas-microsoft-com:datatypes"><Description dt:dt="string">E-Prime Primary Realtime Clock</Description><StartTime><Timestamp dt:dt="int">0</Timestamp><DateUtc dt:dt="string">2021-12-17T01:46:23Z</DateUtc></StartTime><FrequencyChanges><FrequencyChange><Frequency dt:dt="r8">10000000</Frequency><Timestamp dt:dt="r8">583939301381</Timestamp><Current dt:dt…	60.007	1.0.0.33	1	-175485389	2.0.10.182	12-17-2021	2021-12-17 01:46:23	09:46:23	2.0.10.92	1	affpro	WordList	1	1	1	52		NULL	NULL	9	NULL	NULL	NULL	NULL	NULL	NULL	NULL	NULL	NULL	NULL	NULL	NULL	pra2	taskList1	转基因大豆+不成熟的	NULL	NULL	NULL	NULL	NULL	NULL	NULL	NULL	NULL	1
大创GO-NOGO	1	1	<?xml version="1.0"?>\n<Clock xmlns:dt="urn:schemas-microsoft-com:datatypes"><Description dt:dt="string">E-Prime Primary Realtime Clock</Description><StartTime><Timestamp dt:dt="int">0</Timestamp><DateUtc dt:dt="string">2021-12-17T01:46:23Z</DateUtc></StartTime><FrequencyChanges><FrequencyChange><Frequency dt:dt="r8">10000000</Frequency><Timestamp dt:dt="r8">583939301381</Timestamp><Current dt:dt…	60.007	1.0.0.33	1	-175485389	2.0.10.182	12-17-2021	2021-12-17 01:46:23	09:46:23	2.0.10.92	1	affpro	WordList	1	1	1	53		NULL	NULL	14	NULL	NULL	NULL	NULL	NULL	NULL	NULL	NULL	NULL	NULL	NULL	NULL	pra2	taskList1	动物转基因+高风险的	NULL	NULL	NULL	NULL	NULL	NULL	NULL	NULL	NULL	1
大创GO-NOGO	1	1	<?xml version="1.0"?>\n<Clock xmlns:dt="urn:schemas-microsoft-com:datatypes"><Description dt:dt="string">E-Prime Primary Realtime Clock</Description><StartTime><Timestamp dt:dt="int">0</Timestamp><DateUtc dt:dt="string">2021-12-17T01:46:23Z</DateUtc></StartTime><FrequencyChanges><FrequencyChange><Frequency dt:dt="r8">10000000</Frequency><Timestamp dt:dt="r8">583939301381</Timestamp><Current dt:dt…	60.007	1.0.0.33	1	-175485389	2.0.10.182	12-17-2021	2021-12-17 01:46:23	09:46:23	2.0.10.92	1	affpro	WordList	1	1	1	54		NULL	NULL	5	NULL	NULL	NULL	NULL	NULL	NULL	NULL	NULL	NULL	NULL	NULL	NULL	pra2	taskList1	抗虫害棉花+不成熟的	NULL	NULL	NULL	NULL	NULL	NULL	NULL	NULL	NULL	1
大创GO-NOGO	1	1	<?xml version="1.0"?>\n<Clock xmlns:dt="urn:schemas-microsoft-com:datatypes"><Description dt:dt="string">E-Prime Primary Realtime Clock</Description><StartTime><Timestamp dt:dt="int">0</Timestamp><DateUtc dt:dt="string">2021-12-17T01:46:23Z</DateUtc></StartTime><FrequencyChanges><FrequencyChange><Frequency dt:dt="r8">10000000</Frequency><Timestamp dt:dt="r8">583939301381</Timestamp><Current dt:dt…	60.007	1.0.0.33	1	-175485389	2.0.10.182	12-17-2021	2021-12-17 01:46:23	09:46:23	2.0.10.92	1	affpro	WordList	1	1	1	55	f	NULL	NULL	NULL	NULL	NULL	NULL	16	NULL	NULL	NULL	NULL	NULL	NULL	NULL	NULL	pra2	taskList1	动物转基因+创新的	NULL	NULL	NULL	NULL	NULL	NULL	NULL	NULL	NULL	1	f
大创GO-NOGO	1	1	<?xml version="1.0"?>\n<Clock xmlns:dt="urn:schemas-microsoft-com:datatypes"><Description dt:dt="string">E-Prime Primary Realtime Clock</Description><StartTime><Timestamp dt:dt="int">0</Timestamp><DateUtc dt:dt="string">2021-12-17T01:46:23Z</DateUtc></StartTime><FrequencyChanges><FrequencyChange><Frequency dt:dt="r8">10000000</Frequency><Timestamp dt:dt="r8">583939301381</Timestamp><Current dt:dt…	60.007	1.0.0.33	1	-175485389	2.0.10.182	12-17-2021	2021-12-17 01:46:23	09:46:23	2.0.10.92	1	affpro	WordList	1	1	1	56	f	NULL	NULL	NULL	NULL	NULL	NULL	3	NULL	NULL	NULL	NULL	NULL	NULL	NULL	NULL	pra2	taskList1	转基因食物+高科技的	NULL	NULL	NULL	NULL	NULL	NULL	NULL	NULL	NULL	1	f
大创GO-NOGO	1	1	<?xml version="1.0"?>\n<Clock xmlns:dt="urn:schemas-microsoft-com:datatypes"><Description dt:dt="string">E-Prime Primary Realtime Clock</Description><StartTime><Timestamp dt:dt="int">0</Timestamp><DateUtc dt:dt="string">2021-12-17T01:46:23Z</DateUtc></StartTime><FrequencyChanges><FrequencyChange><Frequency dt:dt="r8">10000000</Frequency><Timestamp dt:dt="r8">583939301381</Timestamp><Current dt:dt…	60.007	1.0.0.33	1	-175485389	2.0.10.182	12-17-2021	2021-12-17 01:46:23	09:46:23	2.0.10.92	1	affpro	WordList	1	1	1	57		NULL	NULL	16	NULL	NULL	NULL	NULL	NULL	NULL	NULL	NULL	NULL	NULL	NULL	NULL	pra2	taskList1	动物转基因+有争议的	NULL	NULL	NULL	NULL	NULL	NULL	NULL	NULL	NULL	1
大创GO-NOGO	1	1	<?xml version="1.0"?>\n<Clock xmlns:dt="urn:schemas-microsoft-com:datatypes"><Description dt:dt="string">E-Prime Primary Realtime Clock</Description><StartTime><Timestamp dt:dt="int">0</Timestamp><DateUtc dt:dt="string">2021-12-17T01:46:23Z</DateUtc></StartTime><FrequencyChanges><FrequencyChange><Frequency dt:dt="r8">10000000</Frequency><Timestamp dt:dt="r8">583939301381</Timestamp><Current dt:dt…	60.007	1.0.0.33	1	-175485389	2.0.10.182	12-17-2021	2021-12-17 01:46:23	09:46:23	2.0.10.92	1	affpro	WordList	1	1	1	58		NULL	NULL	4	NULL	NULL	NULL	NULL	NULL	NULL	NULL	NULL	NULL	NULL	NULL	NULL	pra2	taskList1	转基因食物+有争议的	NULL	NULL	NULL	NULL	NULL	NULL	NULL	NULL	NULL	1
大创GO-NOGO	1	1	<?xml version="1.0"?>\n<Clock xmlns:dt="urn:schemas-microsoft-com:datatypes"><Description dt:dt="string">E-Prime Primary Realtime Clock</Description><StartTime><Timestamp dt:dt="int">0</Timestamp><DateUtc dt:dt="string">2021-12-17T01:46:23Z</DateUtc></StartTime><FrequencyChanges><FrequencyChange><Frequency dt:dt="r8">10000000</Frequency><Timestamp dt:dt="r8">583939301381</Timestamp><Current dt:dt…	60.007	1.0.0.33	1	-175485389	2.0.10.182	12-17-2021	2021-12-17 01:46:23	09:46:23	2.0.10.92	1	affpro	WordList	1	1	1	59	f	NULL	NULL	NULL	NULL	NULL	NULL	5	NULL	NULL	NULL	NULL	NULL	NULL	NULL	NULL	pra2	taskList1	抗虫害棉花+科学的	NULL	NULL	NULL	NULL	NULL	NULL	NULL	NULL	NULL	1	f
大创GO-NOGO	1	1	<?xml version="1.0"?>\n<Clock xmlns:dt="urn:schemas-microsoft-com:datatypes"><Description dt:dt="string">E-Prime Primary Realtime Clock</Description><StartTime><Timestamp dt:dt="int">0</Timestamp><DateUtc dt:dt="string">2021-12-17T01:46:23Z</DateUtc></StartTime><FrequencyChanges><FrequencyChange><Frequency dt:dt="r8">10000000</Frequency><Timestamp dt:dt="r8">583939301381</Timestamp><Current dt:dt…	60.007	1.0.0.33	1	-175485389	2.0.10.182	12-17-2021	2021-12-17 01:46:23	09:46:23	2.0.10.92	1	affpro	WordList	1	1	1	60	f	NULL	NULL	NULL	NULL	NULL	NULL	14	NULL	NULL	NULL	NULL	NULL	NULL	NULL	NULL	pra2	taskList1	动物转基因+高产的	NULL	NULL	NULL	NULL	NULL	NULL	NULL	NULL	NULL	1	f
大创GO-NOGO	1	1	<?xml version="1.0"?>\n<Clock xmlns:dt="urn:schemas-microsoft-com:datatypes"><Description dt:dt="string">E-Prime Primary Realtime Clock</Description><StartTime><Timestamp dt:dt="int">0</Timestamp><DateUtc dt:dt="string">2021-12-17T01:46:23Z</DateUtc></StartTime><FrequencyChanges><FrequencyChange><Frequency dt:dt="r8">10000000</Frequency><Timestamp dt:dt="r8">583939301381</Timestamp><Current dt:dt…	60.007	1.0.0.33	1	-175485389	2.0.10.182	12-17-2021	2021-12-17 01:46:23	09:46:23	2.0.10.92	1	affpro	WordList	1	1	1	61		NULL	NULL	9	NULL	NULL	NULL	NULL	NULL	NULL	NULL	NULL	NULL	NULL	NULL	NULL	pra2	taskList1	转基因大豆+不成熟的	NULL	NULL	NULL	NULL	NULL	NULL	NULL	NULL	NULL	1
大创GO-NOGO	1	1	<?xml version="1.0"?>\n<Clock xmlns:dt="urn:schemas-microsoft-com:datatypes"><Description dt:dt="string">E-Prime Primary Realtime Clock</Description><StartTime><Timestamp dt:dt="int">0</Timestamp><DateUtc dt:dt="string">2021-12-17T01:46:23Z</DateUtc></StartTime><FrequencyChanges><FrequencyChange><Frequency dt:dt="r8">10000000</Frequency><Timestamp dt:dt="r8">583939301381</Timestamp><Current dt:dt…	60.007	1.0.0.33	1	-175485389	2.0.10.182	12-17-2021	2021-12-17 01:46:23	09:46:23	2.0.10.92	1	affpro	WordList	1	1	1	62	f	NULL	NULL	NULL	NULL	NULL	NULL	12	NULL	NULL	NULL	NULL	NULL	NULL	NULL	NULL	pra2	taskList1	转基因大豆+创新的	NULL	NULL	NULL	NULL	NULL	NULL	NULL	NULL	NULL	1	f
大创GO-NOGO	1	1	<?xml version="1.0"?>\n<Clock xmlns:dt="urn:schemas-microsoft-com:datatypes"><Description dt:dt="string">E-Prime Primary Realtime Clock</Description><StartTime><Timestamp dt:dt="int">0</Timestamp><DateUtc dt:dt="string">2021-12-17T01:46:23Z</DateUtc></StartTime><FrequencyChanges><FrequencyChange><Frequency dt:dt="r8">10000000</Frequency><Timestamp dt:dt="r8">583939301381</Timestamp><Current dt:dt…	60.007	1.0.0.33	1	-175485389	2.0.10.182	12-17-2021	2021-12-17 01:46:23	09:46:23	2.0.10.92	1	affpro	WordList	1	1	1	63	f	NULL	NULL	NULL	NULL	NULL	NULL	3	NULL	NULL	NULL	NULL	NULL	NULL	NULL	NULL	pra2	taskList1	转基因食物+高科技的	NULL	NULL	NULL	NULL	NULL	NULL	NULL	NULL	NULL	1	f
大创GO-NOGO	1	1	<?xml version="1.0"?>\n<Clock xmlns:dt="urn:schemas-microsoft-com:datatypes"><Description dt:dt="string">E-Prime Primary Realtime Clock</Description><StartTime><Timestamp dt:dt="int">0</Timestamp><DateUtc dt:dt="string">2021-12-17T01:46:23Z</DateUtc></StartTime><FrequencyChanges><FrequencyChange><Frequency dt:dt="r8">10000000</Frequency><Timestamp dt:dt="r8">583939301381</Timestamp><Current dt:dt…	60.007	1.0.0.33	1	-175485389	2.0.10.182	12-17-2021	2021-12-17 01:46:23	09:46:23	2.0.10.92	1	affpro	WordList	1	1	1	64	f	NULL	NULL	NULL	NULL	NULL	NULL	6	NULL	NULL	NULL	NULL	NULL	NULL	NULL	NULL	pra2	taskList1	抗虫害棉花+高产的	NULL	NULL	NULL	NULL	NULL	NULL	NULL	NULL	NULL	1	f
大创GO-NOGO	1	1	<?xml version="1.0"?>\n<Clock xmlns:dt="urn:schemas-microsoft-com:datatypes"><Description dt:dt="string">E-Prime Primary Realtime Clock</Description><StartTime><Timestamp dt:dt="int">0</Timestamp><DateUtc dt:dt="string">2021-12-17T01:46:23Z</DateUtc></StartTime><FrequencyChanges><FrequencyChange><Frequency dt:dt="r8">10000000</Frequency><Timestamp dt:dt="r8">583939301381</Timestamp><Current dt:dt…	60.007	1.0.0.33	1	-175485389	2.0.10.182	12-17-2021	2021-12-17 01:46:23	09:46:23	2.0.10.92	1	affpro	WordList	1	1	1	65		NULL	NULL	10	NULL	NULL	NULL	NULL	NULL	NULL	NULL	NULL	NULL	NULL	NULL	NULL	pra2	taskList1	转基因大豆+高风险的	NULL	NULL	NULL	NULL	NULL	NULL	NULL	NULL	NULL	1
大创GO-NOGO	1	1	<?xml version="1.0"?>\n<Clock xmlns:dt="urn:schemas-microsoft-com:datatypes"><Description dt:dt="string">E-Prime Primary Realtime Clock</Description><StartTime><Timestamp dt:dt="int">0</Timestamp><DateUtc dt:dt="string">2021-12-17T01:46:23Z</DateUtc></StartTime><FrequencyChanges><FrequencyChange><Frequency dt:dt="r8">10000000</Frequency><Timestamp dt:dt="r8">583939301381</Timestamp><Current dt:dt…	60.007	1.0.0.33	1	-175485389	2.0.10.182	12-17-2021	2021-12-17 01:46:23	09:46:23	2.0.10.92	1	affpro	WordList	1	1	1	66		NULL	NULL	2	NULL	NULL	NULL	NULL	NULL	NULL	NULL	NULL	NULL	NULL	NULL	NULL	pra2	taskList1	转基因食物+高风险的	NULL	NULL	NULL	NULL	NULL	NULL	NULL	NULL	NULL	1
大创GO-NOGO	1	1	<?xml version="1.0"?>\n<Clock xmlns:dt="urn:schemas-microsoft-com:datatypes"><Description dt:dt="string">E-Prime Primary Realtime Clock</Description><StartTime><Timestamp dt:dt="int">0</Timestamp><DateUtc dt:dt="string">2021-12-17T01:46:23Z</DateUtc></StartTime><FrequencyChanges><FrequencyChange><Frequency dt:dt="r8">10000000</Frequency><Timestamp dt:dt="r8">583939301381</Timestamp><Current dt:dt…	60.007	1.0.0.33	1	-175485389	2.0.10.182	12-17-2021	2021-12-17 01:46:23	09:46:23	2.0.10.92	1	affpro	WordList	1	1	1	67		NULL	NULL	6	NULL	NULL	NULL	NULL	NULL	NULL	NULL	NULL	NULL	NULL	NULL	NULL	pra2	taskList1	抗虫害棉花+高风险的	NULL	NULL	NULL	NULL	NULL	NULL	NULL	NULL	NULL	1
大创GO-NOGO	1	1	<?xml version="1.0"?>\n<Clock xmlns:dt="urn:schemas-microsoft-com:datatypes"><Description dt:dt="string">E-Prime Primary Realtime Clock</Description><StartTime><Timestamp dt:dt="int">0</Timestamp><DateUtc dt:dt="string">2021-12-17T01:46:23Z</DateUtc></StartTime><FrequencyChanges><FrequencyChange><Frequency dt:dt="r8">10000000</Frequency><Timestamp dt:dt="r8">583939301381</Timestamp><Current dt:dt…	60.007	1.0.0.33	1	-175485389	2.0.10.182	12-17-2021	2021-12-17 01:46:23	09:46:23	2.0.10.92	1	affpro	WordList	1	1	1	68	f	NULL	NULL	NULL	NULL	NULL	NULL	1	NULL	NULL	NULL	NULL	NULL	NULL	NULL	NULL	pra2	taskList1	转基因食物+科学的	NULL	NULL	NULL	NULL	NULL	NULL	NULL	NULL	NULL	1	f
大创GO-NOGO	1	1	<?xml version="1.0"?>\n<Clock xmlns:dt="urn:schemas-microsoft-com:datatypes"><Description dt:dt="string">E-Prime Primary Realtime Clock</Description><StartTime><Timestamp dt:dt="int">0</Timestamp><DateUtc dt:dt="string">2021-12-17T01:46:23Z</DateUtc></StartTime><FrequencyChanges><FrequencyChange><Frequency dt:dt="r8">10000000</Frequency><Timestamp dt:dt="r8">583939301381</Timestamp><Current dt:dt…	60.007	1.0.0.33	1	-175485389	2.0.10.182	12-17-2021	2021-12-17 01:46:23	09:46:23	2.0.10.92	1	affpro	WordList	1	1	1	69	f	NULL	NULL	NULL	NULL	NULL	NULL	13	NULL	NULL	NULL	NULL	NULL	NULL	NULL	NULL	pra2	taskList1	动物转基因+科学的	NULL	NULL	NULL	NULL	NULL	NULL	NULL	NULL	NULL	1	f
大创GO-NOGO	1	1	<?xml version="1.0"?>\n<Clock xmlns:dt="urn:schemas-microsoft-com:datatypes"><Description dt:dt="string">E-Prime Primary Realtime Clock</Description><StartTime><Timestamp dt:dt="int">0</Timestamp><DateUtc dt:dt="string">2021-12-17T01:46:23Z</DateUtc></StartTime><FrequencyChanges><FrequencyChange><Frequency dt:dt="r8">10000000</Frequency><Timestamp dt:dt="r8">583939301381</Timestamp><Current dt:dt…	60.007	1.0.0.33	1	-175485389	2.0.10.182	12-17-2021	2021-12-17 01:46:23	09:46:23	2.0.10.92	1	affpro	WordList	1	1	1	70	f	NULL	NULL	NULL	NULL	NULL	NULL	11	NULL	NULL	NULL	NULL	NULL	NULL	NULL	NULL	pra2	taskList1	转基因大豆+高科技的	NULL	NULL	NULL	NULL	NULL	NULL	NULL	NULL	NULL	0	f
大创GO-NOGO	1	1	<?xml version="1.0"?>\n<Clock xmlns:dt="urn:schemas-microsoft-com:datatypes"><Description dt:dt="string">E-Prime Primary Realtime Clock</Description><StartTime><Timestamp dt:dt="int">0</Timestamp><DateUtc dt:dt="string">2021-12-17T01:46:23Z</DateUtc></StartTime><FrequencyChanges><FrequencyChange><Frequency dt:dt="r8">10000000</Frequency><Timestamp dt:dt="r8">583939301381</Timestamp><Current dt:dt…	60.007	1.0.0.33	1	-175485389	2.0.10.182	12-17-2021	2021-12-17 01:46:23	09:46:23	2.0.10.92	1	affpro	WordList	1	1	1	71		NULL	NULL	1	NULL	NULL	NULL	NULL	NULL	NULL	NULL	NULL	NULL	NULL	NULL	NULL	pra2	taskList1	转基因食物+不成熟的	NULL	NULL	NULL	NULL	NULL	NULL	NULL	NULL	NULL	1
大创GO-NOGO	1	1	<?xml version="1.0"?>\n<Clock xmlns:dt="urn:schemas-microsoft-com:datatypes"><Description dt:dt="string">E-Prime Primary Realtime Clock</Description><StartTime><Timestamp dt:dt="int">0</Timestamp><DateUtc dt:dt="string">2021-12-17T01:46:23Z</DateUtc></StartTime><FrequencyChanges><FrequencyChange><Frequency dt:dt="r8">10000000</Frequency><Timestamp dt:dt="r8">583939301381</Timestamp><Current dt:dt…	60.007	1.0.0.33	1	-175485389	2.0.10.182	12-17-2021	2021-12-17 01:46:23	09:46:23	2.0.10.92	1	affpro	WordList	1	1	1	72	f	NULL	NULL	NULL	NULL	NULL	NULL	9	NULL	NULL	NULL	NULL	NULL	NULL	NULL	NULL	pra2	taskList1	转基因大豆+科学的	NULL	NULL	NULL	NULL	NULL	NULL	NULL	NULL	NULL	1	f
大创GO-NOGO	1	1	<?xml version="1.0"?>\n<Clock xmlns:dt="urn:schemas-microsoft-com:datatypes"><Description dt:dt="string">E-Prime Primary Realtime Clock</Description><StartTime><Timestamp dt:dt="int">0</Timestamp><DateUtc dt:dt="string">2021-12-17T01:46:23Z</DateUtc></StartTime><FrequencyChanges><FrequencyChange><Frequency dt:dt="r8">10000000</Frequency><Timestamp dt:dt="r8">583939301381</Timestamp><Current dt:dt…	60.007	1.0.0.33	1	-175485389	2.0.10.182	12-17-2021	2021-12-17 01:46:23	09:46:23	2.0.10.92	1	affpro	WordList	1	1	1	73		NULL	NULL	11	NULL	NULL	NULL	NULL	NULL	NULL	NULL	NULL	NULL	NULL	NULL	NULL	pra2	taskList1	转基因大豆+非天然的	NULL	NULL	NULL	NULL	NULL	NULL	NULL	NULL	NULL	1
大创GO-NOGO	1	1	<?xml version="1.0"?>\n<Clock xmlns:dt="urn:schemas-microsoft-com:datatypes"><Description dt:dt="string">E-Prime Primary Realtime Clock</Description><StartTime><Timestamp dt:dt="int">0</Timestamp><DateUtc dt:dt="string">2021-12-17T01:46:23Z</DateUtc></StartTime><FrequencyChanges><FrequencyChange><Frequency dt:dt="r8">10000000</Frequency><Timestamp dt:dt="r8">583939301381</Timestamp><Current dt:dt…	60.007	1.0.0.33	1	-175485389	2.0.10.182	12-17-2021	2021-12-17 01:46:23	09:46:23	2.0.10.92	1	affpro	WordList	1	1	1	74	f	NULL	NULL	NULL	NULL	NULL	NULL	8	NULL	NULL	NULL	NULL	NULL	NULL	NULL	NULL	pra2	taskList1	抗虫害棉花+创新的	NULL	NULL	NULL	NULL	NULL	NULL	NULL	NULL	NULL	1	f
大创GO-NOGO	1	1	<?xml version="1.0"?>\n<Clock xmlns:dt="urn:schemas-microsoft-com:datatypes"><Description dt:dt="string">E-Prime Primary Realtime Clock</Description><StartTime><Timestamp dt:dt="int">0</Timestamp><DateUtc dt:dt="string">2021-12-17T01:46:23Z</DateUtc></StartTime><FrequencyChanges><FrequencyChange><Frequency dt:dt="r8">10000000</Frequency><Timestamp dt:dt="r8">583939301381</Timestamp><Current dt:dt…	60.007	1.0.0.33	1	-175485389	2.0.10.182	12-17-2021	2021-12-17 01:46:23	09:46:23	2.0.10.92	1	affpro	WordList	1	1	1	75	f	NULL	NULL	NULL	NULL	NULL	NULL	7	NULL	NULL	NULL	NULL	NULL	NULL	NULL	NULL	pra2	taskList1	抗虫害棉花+高科技的	NULL	NULL	NULL	NULL	NULL	NULL	NULL	NULL	NULL	1	f
大创GO-NOGO	1	1	<?xml version="1.0"?>\n<Clock xmlns:dt="urn:schemas-microsoft-com:datatypes"><Description dt:dt="string">E-Prime Primary Realtime Clock</Description><StartTime><Timestamp dt:dt="int">0</Timestamp><DateUtc dt:dt="string">2021-12-17T01:46:23Z</DateUtc></StartTime><FrequencyChanges><FrequencyChange><Frequency dt:dt="r8">10000000</Frequency><Timestamp dt:dt="r8">583939301381</Timestamp><Current dt:dt…	60.007	1.0.0.33	1	-175485389	2.0.10.182	12-17-2021	2021-12-17 01:46:23	09:46:23	2.0.10.92	1	affpro	WordList	1	1	1	76	f	NULL	NULL	NULL	NULL	NULL	NULL	10	NULL	NULL	NULL	NULL	NULL	NULL	NULL	NULL	pra2	taskList1	转基因大豆+高产的	NULL	NULL	NULL	NULL	NULL	NULL	NULL	NULL	NULL	1	f
大创GO-NOGO	1	1	<?xml version="1.0"?>\n<Clock xmlns:dt="urn:schemas-microsoft-com:datatypes"><Description dt:dt="string">E-Prime Primary Realtime Clock</Description><StartTime><Timestamp dt:dt="int">0</Timestamp><DateUtc dt:dt="string">2021-12-17T01:46:23Z</DateUtc></StartTime><FrequencyChanges><FrequencyChange><Frequency dt:dt="r8">10000000</Frequency><Timestamp dt:dt="r8">583939301381</Timestamp><Current dt:dt…	60.007	1.0.0.33	1	-175485389	2.0.10.182	12-17-2021	2021-12-17 01:46:23	09:46:23	2.0.10.92	1	affpro	WordList	1	1	1	77	f	NULL	NULL	NULL	NULL	NULL	NULL	15	NULL	NULL	NULL	NULL	NULL	NULL	NULL	NULL	pra2	taskList1	动物转基因+高科技的	NULL	NULL	NULL	NULL	NULL	NULL	NULL	NULL	NULL	1	f
大创GO-NOGO	1	1	<?xml version="1.0"?>\n<Clock xmlns:dt="urn:schemas-microsoft-com:datatypes"><Description dt:dt="string">E-Prime Primary Realtime Clock</Description><StartTime><Timestamp dt:dt="int">0</Timestamp><DateUtc dt:dt="string">2021-12-17T01:46:23Z</DateUtc></StartTime><FrequencyChanges><FrequencyChange><Frequency dt:dt="r8">10000000</Frequency><Timestamp dt:dt="r8">583939301381</Timestamp><Current dt:dt…	60.007	1.0.0.33	1	-175485389	2.0.10.182	12-17-2021	2021-12-17 01:46:23	09:46:23	2.0.10.92	1	affpro	WordList	1	1	1	78		NULL	NULL	7	NULL	NULL	NULL	NULL	NULL	NULL	NULL	NULL	NULL	NULL	NULL	NULL	pra2	taskList1	抗虫害棉花+非天然的	NULL	NULL	NULL	NULL	NULL	NULL	NULL	NULL	NULL	1
大创GO-NOGO	1	1	<?xml version="1.0"?>\n<Clock xmlns:dt="urn:schemas-microsoft-com:datatypes"><Description dt:dt="string">E-Prime Primary Realtime Clock</Description><StartTime><Timestamp dt:dt="int">0</Timestamp><DateUtc dt:dt="string">2021-12-17T01:46:23Z</DateUtc></StartTime><FrequencyChanges><FrequencyChange><Frequency dt:dt="r8">10000000</Frequency><Timestamp dt:dt="r8">583939301381</Timestamp><Current dt:dt…	60.007	1.0.0.33	1	-175485389	2.0.10.182	12-17-2021	2021-12-17 01:46:23	09:46:23	2.0.10.92	1	affpro	WordList	1	1	1	79	f	NULL	NULL	NULL	NULL	NULL	NULL	4	NULL	NULL	NULL	NULL	NULL	NULL	NULL	NULL	pra2	taskList1	转基因食物+创新的	NULL	NULL	NULL	NULL	NULL	NULL	NULL	NULL	NULL	1	f
大创GO-NOGO	1	1	<?xml version="1.0"?>\n<Clock xmlns:dt="urn:schemas-microsoft-com:datatypes"><Description dt:dt="string">E-Prime Primary Realtime Clock</Description><StartTime><Timestamp dt:dt="int">0</Timestamp><DateUtc dt:dt="string">2021-12-17T01:46:23Z</DateUtc></StartTime><FrequencyChanges><FrequencyChange><Frequency dt:dt="r8">10000000</Frequency><Timestamp dt:dt="r8">583939301381</Timestamp><Current dt:dt…	60.007	1.0.0.33	1	-175485389	2.0.10.182	12-17-2021	2021-12-17 01:46:23	09:46:23	2.0.10.92	1	affpro	WordList	1	1	1	80	f	NULL	NULL	NULL	NULL	NULL	NULL	16	NULL	NULL	NULL	NULL	NULL	NULL	NULL	NULL	pra2	taskList1	动物转基因+创新的	NULL	NULL	NULL	NULL	NULL	NULL	NULL	NULL	NULL	1	f
大创GO-NOGO	1	1	<?xml version="1.0"?>\n<Clock xmlns:dt="urn:schemas-microsoft-com:datatypes"><Description dt:dt="string">E-Prime Primary Realtime Clock</Description><StartTime><Timestamp dt:dt="int">0</Timestamp><DateUtc dt:dt="string">2021-12-17T01:46:23Z</DateUtc></StartTime><FrequencyChanges><FrequencyChange><Frequency dt:dt="r8">10000000</Frequency><Timestamp dt:dt="r8">583939301381</Timestamp><Current dt:dt…	60.007	1.0.0.33	1	-175485389	2.0.10.182	12-17-2021	2021-12-17 01:46:23	09:46:23	2.0.10.92	1	affpro	WordList	1	1	1	81	f	NULL	NULL	NULL	NULL	NULL	NULL	14	NULL	NULL	NULL	NULL	NULL	NULL	NULL	NULL	pra2	taskList1	动物转基因+高产的	NULL	NULL	NULL	NULL	NULL	NULL	NULL	NULL	NULL	1	f
大创GO-NOGO	1	1	<?xml version="1.0"?>\n<Clock xmlns:dt="urn:schemas-microsoft-com:datatypes"><Description dt:dt="string">E-Prime Primary Realtime Clock</Description><StartTime><Timestamp dt:dt="int">0</Timestamp><DateUtc dt:dt="string">2021-12-17T01:46:23Z</DateUtc></StartTime><FrequencyChanges><FrequencyChange><Frequency dt:dt="r8">10000000</Frequency><Timestamp dt:dt="r8">583939301381</Timestamp><Current dt:dt…	60.007	1.0.0.33	1	-175485389	2.0.10.182	12-17-2021	2021-12-17 01:46:23	09:46:23	2.0.10.92	1	affpro	WordList	1	1	1	82		NULL	NULL	12	NULL	NULL	NULL	NULL	NULL	NULL	NULL	NULL	NULL	NULL	NULL	NULL	pra2	taskList1	转基因大豆+有争议的	NULL	NULL	NULL	NULL	NULL	NULL	NULL	NULL	NULL	1
大创GO-NOGO	1	1	<?xml version="1.0"?>\n<Clock xmlns:dt="urn:schemas-microsoft-com:datatypes"><Description dt:dt="string">E-Prime Primary Realtime Clock</Description><StartTime><Timestamp dt:dt="int">0</Timestamp><DateUtc dt:dt="string">2021-12-17T01:46:23Z</DateUtc></StartTime><FrequencyChanges><FrequencyChange><Frequency dt:dt="r8">10000000</Frequency><Timestamp dt:dt="r8">583939301381</Timestamp><Current dt:dt…	60.007	1.0.0.33	1	-175485389	2.0.10.182	12-17-2021	2021-12-17 01:46:23	09:46:23	2.0.10.92	1	affpro	WordList	1	1	1	83		NULL	NULL	3	NULL	NULL	NULL	NULL	NULL	NULL	NULL	NULL	NULL	NULL	NULL	NULL	pra2	taskList1	转基因食物+非天然的	NULL	NULL	NULL	NULL	NULL	NULL	NULL	NULL	NULL	1
大创GO-NOGO	1	1	<?xml version="1.0"?>\n<Clock xmlns:dt="urn:schemas-microsoft-com:datatypes"><Description dt:dt="string">E-Prime Primary Realtime Clock</Description><StartTime><Timestamp dt:dt="int">0</Timestamp><DateUtc dt:dt="string">2021-12-17T01:46:23Z</DateUtc></StartTime><FrequencyChanges><FrequencyChange><Frequency dt:dt="r8">10000000</Frequency><Timestamp dt:dt="r8">583939301381</Timestamp><Current dt:dt…	60.007	1.0.0.33	1	-175485389	2.0.10.182	12-17-2021	2021-12-17 01:46:23	09:46:23	2.0.10.92	1	affpro	WordList	1	1	1	84		NULL	NULL	15	NULL	NULL	NULL	NULL	NULL	NULL	NULL	NULL	NULL	NULL	NULL	NULL	pra2	taskList1	动物转基因+非天然的	NULL	NULL	NULL	NULL	NULL	NULL	NULL	NULL	NULL	1
大创GO-NOGO	1	1	<?xml version="1.0"?>\n<Clock xmlns:dt="urn:schemas-microsoft-com:datatypes"><Description dt:dt="string">E-Prime Primary Realtime Clock</Description><StartTime><Timestamp dt:dt="int">0</Timestamp><DateUtc dt:dt="string">2021-12-17T01:46:23Z</DateUtc></StartTime><FrequencyChanges><FrequencyChange><Frequency dt:dt="r8">10000000</Frequency><Timestamp dt:dt="r8">583939301381</Timestamp><Current dt:dt…	60.007	1.0.0.33	1	-175485389	2.0.10.182	12-17-2021	2021-12-17 01:46:23	09:46:23	2.0.10.92	1	affpro	WordList	1	1	1	85	f	NULL	NULL	NULL	NULL	NULL	NULL	5	NULL	NULL	NULL	NULL	NULL	NULL	NULL	NULL	pra2	taskList1	抗虫害棉花+科学的	NULL	NULL	NULL	NULL	NULL	NULL	NULL	NULL	NULL	1	f
大创GO-NOGO	1	1	<?xml version="1.0"?>\n<Clock xmlns:dt="urn:schemas-microsoft-com:datatypes"><Description dt:dt="string">E-Prime Primary Realtime Clock</Description><StartTime><Timestamp dt:dt="int">0</Timestamp><DateUtc dt:dt="string">2021-12-17T01:46:23Z</DateUtc></StartTime><FrequencyChanges><FrequencyChange><Frequency dt:dt="r8">10000000</Frequency><Timestamp dt:dt="r8">583939301381</Timestamp><Current dt:dt…	60.007	1.0.0.33	1	-175485389	2.0.10.182	12-17-2021	2021-12-17 01:46:23	09:46:23	2.0.10.92	1	affpro	WordList	1	1	1	86		NULL	NULL	8	NULL	NULL	NULL	NULL	NULL	NULL	NULL	NULL	NULL	NULL	NULL	NULL	pra2	taskList1	抗虫害棉花+有争议的	NULL	NULL	NULL	NULL	NULL	NULL	NULL	NULL	NULL	1
大创GO-NOGO	1	1	<?xml version="1.0"?>\n<Clock xmlns:dt="urn:schemas-microsoft-com:datatypes"><Description dt:dt="string">E-Prime Primary Realtime Clock</Description><StartTime><Timestamp dt:dt="int">0</Timestamp><DateUtc dt:dt="string">2021-12-17T01:46:23Z</DateUtc></StartTime><FrequencyChanges><FrequencyChange><Frequency dt:dt="r8">10000000</Frequency><Timestamp dt:dt="r8">583939301381</Timestamp><Current dt:dt…	60.007	1.0.0.33	1	-175485389	2.0.10.182	12-17-2021	2021-12-17 01:46:23	09:46:23	2.0.10.92	1	affpro	WordList	1	1	1	87	f	NULL	NULL	NULL	NULL	NULL	NULL	2	NULL	NULL	NULL	NULL	NULL	NULL	NULL	NULL	pra2	taskList1	转基因食物+高产的	NULL	NULL	NULL	NULL	NULL	NULL	NULL	NULL	NULL	1	f
大创GO-NOGO	1	1	<?xml version="1.0"?>\n<Clock xmlns:dt="urn:schemas-microsoft-com:datatypes"><Description dt:dt="string">E-Prime Primary Realtime Clock</Description><StartTime><Timestamp dt:dt="int">0</Timestamp><DateUtc dt:dt="string">2021-12-17T01:46:23Z</DateUtc></StartTime><FrequencyChanges><FrequencyChange><Frequency dt:dt="r8">10000000</Frequency><Timestamp dt:dt="r8">583939301381</Timestamp><Current dt:dt…	60.007	1.0.0.33	1	-175485389	2.0.10.182	12-17-2021	2021-12-17 01:46:23	09:46:23	2.0.10.92	1	affpro	WordList	1	1	1	88	f	NULL	NULL	NULL	NULL	NULL	NULL	15	NULL	NULL	NULL	NULL	NULL	NULL	NULL	NULL	pra2	taskList1	动物转基因+高科技的	NULL	NULL	NULL	NULL	NULL	NULL	NULL	NULL	NULL	1	f
大创GO-NOGO	1	1	<?xml version="1.0"?>\n<Clock xmlns:dt="urn:schemas-microsoft-com:datatypes"><Description dt:dt="string">E-Prime Primary Realtime Clock</Description><StartTime><Timestamp dt:dt="int">0</Timestamp><DateUtc dt:dt="string">2021-12-17T01:46:23Z</DateUtc></StartTime><FrequencyChanges><FrequencyChange><Frequency dt:dt="r8">10000000</Frequency><Timestamp dt:dt="r8">583939301381</Timestamp><Current dt:dt…	60.007	1.0.0.33	1	-175485389	2.0.10.182	12-17-2021	2021-12-17 01:46:23	09:46:23	2.0.10.92	1	affpro	WordList	1	1	1	89	f	NULL	NULL	NULL	NULL	NULL	NULL	1	NULL	NULL	NULL	NULL	NULL	NULL	NULL	NULL	pra2	taskList1	转基因食物+科学的	NULL	NULL	NULL	NULL	NULL	NULL	NULL	NULL	NULL	1	f
大创GO-NOGO	1	1	<?xml version="1.0"?>\n<Clock xmlns:dt="urn:schemas-microsoft-com:datatypes"><Description dt:dt="string">E-Prime Primary Realtime Clock</Description><StartTime><Timestamp dt:dt="int">0</Timestamp><DateUtc dt:dt="string">2021-12-17T01:46:23Z</DateUtc></StartTime><FrequencyChanges><FrequencyChange><Frequency dt:dt="r8">10000000</Frequency><Timestamp dt:dt="r8">583939301381</Timestamp><Current dt:dt…	60.007	1.0.0.33	1	-175485389	2.0.10.182	12-17-2021	2021-12-17 01:46:23	09:46:23	2.0.10.92	1	affpro	WordList	1	1	1	90	f	NULL	NULL	NULL	NULL	NULL	NULL	3	NULL	NULL	NULL	NULL	NULL	NULL	NULL	NULL	pra2	taskList1	转基因食物+高科技的	NULL	NULL	NULL	NULL	NULL	NULL	NULL	NULL	NULL	1	f
大创GO-NOGO	1	1	<?xml version="1.0"?>\n<Clock xmlns:dt="urn:schemas-microsoft-com:datatypes"><Description dt:dt="string">E-Prime Primary Realtime Clock</Description><StartTime><Timestamp dt:dt="int">0</Timestamp><DateUtc dt:dt="string">2021-12-17T01:46:23Z</DateUtc></StartTime><FrequencyChanges><FrequencyChange><Frequency dt:dt="r8">10000000</Frequency><Timestamp dt:dt="r8">583939301381</Timestamp><Current dt:dt…	60.007	1.0.0.33	1	-175485389	2.0.10.182	12-17-2021	2021-12-17 01:46:23	09:46:23	2.0.10.92	1	affpro	WordList	1	1	1	91		NULL	NULL	13	NULL	NULL	NULL	NULL	NULL	NULL	NULL	NULL	NULL	NULL	NULL	NULL	pra2	taskList1	动物转基因+不成熟的	NULL	NULL	NULL	NULL	NULL	NULL	NULL	NULL	NULL	1
大创GO-NOGO	1	1	<?xml version="1.0"?>\n<Clock xmlns:dt="urn:schemas-microsoft-com:datatypes"><Description dt:dt="string">E-Prime Primary Realtime Clock</Description><StartTime><Timestamp dt:dt="int">0</Timestamp><DateUtc dt:dt="string">2021-12-17T01:46:23Z</DateUtc></StartTime><FrequencyChanges><FrequencyChange><Frequency dt:dt="r8">10000000</Frequency><Timestamp dt:dt="r8">583939301381</Timestamp><Current dt:dt…	60.007	1.0.0.33	1	-175485389	2.0.10.182	12-17-2021	2021-12-17 01:46:23	09:46:23	2.0.10.92	1	affpro	WordList	1	1	1	92		NULL	NULL	9	NULL	NULL	NULL	NULL	NULL	NULL	NULL	NULL	NULL	NULL	NULL	NULL	pra2	taskList1	转基因大豆+不成熟的	NULL	NULL	NULL	NULL	NULL	NULL	NULL	NULL	NULL	1
大创GO-NOGO	1	1	<?xml version="1.0"?>\n<Clock xmlns:dt="urn:schemas-microsoft-com:datatypes"><Description dt:dt="string">E-Prime Primary Realtime Clock</Description><StartTime><Timestamp dt:dt="int">0</Timestamp><DateUtc dt:dt="string">2021-12-17T01:46:23Z</DateUtc></StartTime><FrequencyChanges><FrequencyChange><Frequency dt:dt="r8">10000000</Frequency><Timestamp dt:dt="r8">583939301381</Timestamp><Current dt:dt…	60.007	1.0.0.33	1	-175485389	2.0.10.182	12-17-2021	2021-12-17 01:46:23	09:46:23	2.0.10.92	1	affpro	WordList	1	1	1	93		NULL	NULL	16	NULL	NULL	NULL	NULL	NULL	NULL	NULL	NULL	NULL	NULL	NULL	NULL	pra2	taskList1	动物转基因+有争议的	NULL	NULL	NULL	NULL	NULL	NULL	NULL	NULL	NULL	1
大创GO-NOGO	1	1	<?xml version="1.0"?>\n<Clock xmlns:dt="urn:schemas-microsoft-com:datatypes"><Description dt:dt="string">E-Prime Primary Realtime Clock</Description><StartTime><Timestamp dt:dt="int">0</Timestamp><DateUtc dt:dt="string">2021-12-17T01:46:23Z</DateUtc></StartTime><FrequencyChanges><FrequencyChange><Frequency dt:dt="r8">10000000</Frequency><Timestamp dt:dt="r8">583939301381</Timestamp><Current dt:dt…	60.007	1.0.0.33	1	-175485389	2.0.10.182	12-17-2021	2021-12-17 01:46:23	09:46:23	2.0.10.92	1	affpro	WordList	1	1	1	94	f	NULL	NULL	NULL	NULL	NULL	NULL	9	NULL	NULL	NULL	NULL	NULL	NULL	NULL	NULL	pra2	taskList1	转基因大豆+科学的	NULL	NULL	NULL	NULL	NULL	NULL	NULL	NULL	NULL	1	f
大创GO-NOGO	1	1	<?xml version="1.0"?>\n<Clock xmlns:dt="urn:schemas-microsoft-com:datatypes"><Description dt:dt="string">E-Prime Primary Realtime Clock</Description><StartTime><Timestamp dt:dt="int">0</Timestamp><DateUtc dt:dt="string">2021-12-17T01:46:23Z</DateUtc></StartTime><FrequencyChanges><FrequencyChange><Frequency dt:dt="r8">10000000</Frequency><Timestamp dt:dt="r8">583939301381</Timestamp><Current dt:dt…	60.007	1.0.0.33	1	-175485389	2.0.10.182	12-17-2021	2021-12-17 01:46:23	09:46:23	2.0.10.92	1	affpro	WordList	1	1	1	95		NULL	NULL	11	NULL	NULL	NULL	NULL	NULL	NULL	NULL	NULL	NULL	NULL	NULL	NULL	pra2	taskList1	转基因大豆+非天然的	NULL	NULL	NULL	NULL	NULL	NULL	NULL	NULL	NULL	1
大创GO-NOGO	1	1	<?xml version="1.0"?>\n<Clock xmlns:dt="urn:schemas-microsoft-com:datatypes"><Description dt:dt="string">E-Prime Primary Realtime Clock</Description><StartTime><Timestamp dt:dt="int">0</Timestamp><DateUtc dt:dt="string">2021-12-17T01:46:23Z</DateUtc></StartTime><FrequencyChanges><FrequencyChange><Frequency dt:dt="r8">10000000</Frequency><Timestamp dt:dt="r8">583939301381</Timestamp><Current dt:dt…	60.007	1.0.0.33	1	-175485389	2.0.10.182	12-17-2021	2021-12-17 01:46:23	09:46:23	2.0.10.92	1	affpro	WordList	1	1	1	96	f	NULL	NULL	NULL	NULL	NULL	NULL	4	NULL	NULL	NULL	NULL	NULL	NULL	NULL	NULL	pra2	taskList1	转基因食物+创新的	NULL	NULL	NULL	NULL	NULL	NULL	NULL	NULL	NULL	1	f
大创GO-NOGO	1	1	<?xml version="1.0"?>\n<Clock xmlns:dt="urn:schemas-microsoft-com:datatypes"><Description dt:dt="string">E-Prime Primary Realtime Clock</Description><StartTime><Timestamp dt:dt="int">0</Timestamp><DateUtc dt:dt="string">2021-12-17T01:46:23Z</DateUtc></StartTime><FrequencyChanges><FrequencyChange><Frequency dt:dt="r8">10000000</Frequency><Timestamp dt:dt="r8">583939301381</Timestamp><Current dt:dt…	60.007	1.0.0.33	1	-175485389	2.0.10.182	12-17-2021	2021-12-17 01:46:23	09:46:23	2.0.10.92	1	affpro	WordList	1	1	1	97	NULL		NULL	NULL	NULL	NULL	NULL	NULL	7	NULL	NULL	NULL	NULL	1	1	1	pra3	practiceList2	抗虫害棉花+高科技的	NULL	NULL	NULL	NULL	NULL	NULL	NULL	NULL	NULL	NULL	NULL
大创GO-NOGO	1	1	<?xml version="1.0"?>\n<Clock xmlns:dt="urn:schemas-microsoft-com:datatypes"><Description dt:dt="string">E-Prime Primary Realtime Clock</Description><StartTime><Timestamp dt:dt="int">0</Timestamp><DateUtc dt:dt="string">2021-12-17T01:46:23Z</DateUtc></StartTime><FrequencyChanges><FrequencyChange><Frequency dt:dt="r8">10000000</Frequency><Timestamp dt:dt="r8">583939301381</Timestamp><Current dt:dt…	60.007	1.0.0.33	1	-175485389	2.0.10.182	12-17-2021	2021-12-17 01:46:23	09:46:23	2.0.10.92	1	affpro	WordList	1	1	1	98	NULL		NULL	NULL	NULL	NULL	NULL	NULL	16	NULL	NULL	NULL	NULL	1	2	2	pra3	practiceList2	动物转基因+创新的	NULL	NULL	NULL	NULL	NULL	NULL	NULL	NULL	NULL	NULL	NULL
大创GO-NOGO	1	1	<?xml version="1.0"?>\n<Clock xmlns:dt="urn:schemas-microsoft-com:datatypes"><Description dt:dt="string">E-Prime Primary Realtime Clock</Description><StartTime><Timestamp dt:dt="int">0</Timestamp><DateUtc dt:dt="string">2021-12-17T01:46:23Z</DateUtc></StartTime><FrequencyChanges><FrequencyChange><Frequency dt:dt="r8">10000000</Frequency><Timestamp dt:dt="r8">583939301381</Timestamp><Current dt:dt…	60.007	1.0.0.33	1	-175485389	2.0.10.182	12-17-2021	2021-12-17 01:46:23	09:46:23	2.0.10.92	1	affpro	WordList	1	1	1	99	NULL		NULL	NULL	NULL	NULL	NULL	NULL	6	NULL	NULL	NULL	NULL	1	3	3	pra3	practiceList2	抗虫害棉花+高产的	NULL	NULL	NULL	NULL	NULL	NULL	NULL	NULL	NULL	NULL	NULL
大创GO-NOGO	1	1	<?xml version="1.0"?>\n<Clock xmlns:dt="urn:schemas-microsoft-com:datatypes"><Description dt:dt="string">E-Prime Primary Realtime Clock</Description><StartTime><Timestamp dt:dt="int">0</Timestamp><DateUtc dt:dt="string">2021-12-17T01:46:23Z</DateUtc></StartTime><FrequencyChanges><FrequencyChange><Frequency dt:dt="r8">10000000</Frequency><Timestamp dt:dt="r8">583939301381</Timestamp><Current dt:dt…	60.007	1.0.0.33	1	-175485389	2.0.10.182	12-17-2021	2021-12-17 01:46:23	09:46:23	2.0.10.92	1	affpro	WordList	1	1	1	101	NULL		NULL	NULL	NULL	NULL	NULL	NULL	2	NULL	NULL	NULL	NULL	1	5	5	pra3	practiceList2	转基因食物+高产的	NULL	NULL	NULL	NULL	NULL	NULL	NULL	NULL	NULL	NULL	NULL
大创GO-NOGO	1	1	<?xml version="1.0"?>\n<Clock xmlns:dt="urn:schemas-microsoft-com:datatypes"><Description dt:dt="string">E-Prime Primary Realtime Clock</Description><StartTime><Timestamp dt:dt="int">0</Timestamp><DateUtc dt:dt="string">2021-12-17T01:46:23Z</DateUtc></StartTime><FrequencyChanges><FrequencyChange><Frequency dt:dt="r8">10000000</Frequency><Timestamp dt:dt="r8">583939301381</Timestamp><Current dt:dt…	60.007	1.0.0.33	1	-175485389	2.0.10.182	12-17-2021	2021-12-17 01:46:23	09:46:23	2.0.10.92	1	affpro	WordList	1	1	1	102	NULL		NULL	NULL	NULL	NULL	NULL	NULL	13	NULL	NULL	NULL	NULL	1	6	6	pra3	practiceList2	动物转基因+科学的	NULL	NULL	NULL	NULL	NULL	NULL	NULL	NULL	NULL	NULL	NULL
大创GO-NOGO	1	1	<?xml version="1.0"?>\n<Clock xmlns:dt="urn:schemas-microsoft-com:datatypes"><Description dt:dt="string">E-Prime Primary Realtime Clock</Description><StartTime><Timestamp dt:dt="int">0</Timestamp><DateUtc dt:dt="string">2021-12-17T01:46:23Z</DateUtc></StartTime><FrequencyChanges><FrequencyChange><Frequency dt:dt="r8">10000000</Frequency><Timestamp dt:dt="r8">583939301381</Timestamp><Current dt:dt…	60.007	1.0.0.33	1	-175485389	2.0.10.182	12-17-2021	2021-12-17 01:46:23	09:46:23	2.0.10.92	1	affpro	WordList	1	1	1	103	NULL		NULL	NULL	NULL	NULL	NULL	NULL	4	NULL	NULL	NULL	NULL	1	7	7	pra3	practiceList2	转基因食物+创新的	NULL	NULL	NULL	NULL	NULL	NULL	NULL	NULL	NULL	NULL	NULL
大创GO-NOGO	1	1	<?xml version="1.0"?>\n<Clock xmlns:dt="urn:schemas-microsoft-com:datatypes"><Description dt:dt="string">E-Prime Primary Realtime Clock</Description><StartTime><Timestamp dt:dt="int">0</Timestamp><DateUtc dt:dt="string">2021-12-17T01:46:23Z</DateUtc></StartTime><FrequencyChanges><FrequencyChange><Frequency dt:dt="r8">10000000</Frequency><Timestamp dt:dt="r8">583939301381</Timestamp><Current dt:dt…	60.007	1.0.0.33	1	-175485389	2.0.10.182	12-17-2021	2021-12-17 01:46:23	09:46:23	2.0.10.92	1	affpro	WordList	1	1	1	104	NULL		NULL	NULL	NULL	NULL	NULL	NULL	9	NULL	NULL	NULL	NULL	1	8	8	pra3	practiceList2	转基因大豆+科学的	NULL	NULL	NULL	NULL	NULL	NULL	NULL	NULL	NULL	NULL	NULL
大创GO-NOGO	1	1	<?xml version="1.0"?>\n<Clock xmlns:dt="urn:schemas-microsoft-com:datatypes"><Description dt:dt="string">E-Prime Primary Realtime Clock</Description><StartTime><Timestamp dt:dt="int">0</Timestamp><DateUtc dt:dt="string">2021-12-17T01:46:23Z</DateUtc></StartTime><FrequencyChanges><FrequencyChange><Frequency dt:dt="r8">10000000</Frequency><Timestamp dt:dt="r8">583939301381</Timestamp><Current dt:dt…	60.007	1.0.0.33	1	-175485389	2.0.10.182	12-17-2021	2021-12-17 01:46:23	09:46:23	2.0.10.92	1	affpro	WordList	1	1	1	105	NULL	j	NULL	NULL	10	NULL	NULL	NULL	NULL	NULL	NULL	NULL	NULL	2	9	9	pra3	practiceList2	转基因大豆+高风险的	NULL	NULL	NULL	NULL	NULL	NULL	NULL	NULL	NULL	NULL	NULL
大创GO-NOGO	1	1	<?xml version="1.0"?>\n<Clock xmlns:dt="urn:schemas-microsoft-com:datatypes"><Description dt:dt="string">E-Prime Primary Realtime Clock</Description><StartTime><Timestamp dt:dt="int">0</Timestamp><DateUtc dt:dt="string">2021-12-17T01:46:23Z</DateUtc></StartTime><FrequencyChanges><FrequencyChange><Frequency dt:dt="r8">10000000</Frequency><Timestamp dt:dt="r8">583939301381</Timestamp><Current dt:dt…	60.007	1.0.0.33	1	-175485389	2.0.10.182	12-17-2021	2021-12-17 01:46:23	09:46:23	2.0.10.92	1	affpro	WordList	1	1	1	106	NULL		NULL	NULL	NULL	NULL	NULL	NULL	5	NULL	NULL	NULL	NULL	1	10	10	pra3	practiceList2	抗虫害棉花+科学的	NULL	NULL	NULL	NULL	NULL	NULL	NULL	NULL	NULL	NULL	NULL
大创GO-NOGO	1	1	<?xml version="1.0"?>\n<Clock xmlns:dt="urn:schemas-microsoft-com:datatypes"><Description dt:dt="string">E-Prime Primary Realtime Clock</Description><StartTime><Timestamp dt:dt="int">0</Timestamp><DateUtc dt:dt="string">2021-12-17T01:46:23Z</DateUtc></StartTime><FrequencyChanges><FrequencyChange><Frequency dt:dt="r8">10000000</Frequency><Timestamp dt:dt="r8">583939301381</Timestamp><Current dt:dt…	60.007	1.0.0.33	1	-175485389	2.0.10.182	12-17-2021	2021-12-17 01:46:23	09:46:23	2.0.10.92	1	affpro	WordList	1	1	1	107	NULL		NULL	NULL	NULL	NULL	NULL	NULL	10	NULL	NULL	NULL	NULL	1	11	11	pra3	practiceList2	转基因大豆+高产的	NULL	NULL	NULL	NULL	NULL	NULL	NULL	NULL	NULL	NULL	NULL
大创GO-NOGO	1	1	<?xml version="1.0"?>\n<Clock xmlns:dt="urn:schemas-microsoft-com:datatypes"><Description dt:dt="string">E-Prime Primary Realtime Clock</Description><StartTime><Timestamp dt:dt="int">0</Timestamp><DateUtc dt:dt="string">2021-12-17T01:46:23Z</DateUtc></StartTime><FrequencyChanges><FrequencyChange><Frequency dt:dt="r8">10000000</Frequency><Timestamp dt:dt="r8">583939301381</Timestamp><Current dt:dt…	60.007	1.0.0.33	1	-175485389	2.0.10.182	12-17-2021	2021-12-17 01:46:23	09:46:23	2.0.10.92	1	affpro	WordList	1	1	1	108	NULL		NULL	NULL	NULL	NULL	NULL	NULL	11	NULL	NULL	NULL	NULL	1	12	12	pra3	practiceList2	转基因大豆+高科技的	NULL	NULL	NULL	NULL	NULL	NULL	NULL	NULL	NULL	NULL	NULL
大创GO-NOGO	1	1	<?xml version="1.0"?>\n<Clock xmlns:dt="urn:schemas-microsoft-com:datatypes"><Description dt:dt="string">E-Prime Primary Realtime Clock</Description><StartTime><Timestamp dt:dt="int">0</Timestamp><DateUtc dt:dt="string">2021-12-17T01:46:23Z</DateUtc></StartTime><FrequencyChanges><FrequencyChange><Frequency dt:dt="r8">10000000</Frequency><Timestamp dt:dt="r8">583939301381</Timestamp><Current dt:dt…	60.007	1.0.0.33	1	-175485389	2.0.10.182	12-17-2021	2021-12-17 01:46:23	09:46:23	2.0.10.92	1	affpro	WordList	1	1	1	109	NULL		NULL	NULL	NULL	NULL	NULL	NULL	12	NULL	NULL	NULL	NULL	1	13	13	pra3	practiceList2	转基因大豆+创新的	NULL	NULL	NULL	NULL	NULL	NULL	NULL	NULL	NULL	NULL	NULL
大创GO-NOGO	1	1	<?xml version="1.0"?>\n<Clock xmlns:dt="urn:schemas-microsoft-com:datatypes"><Description dt:dt="string">E-Prime Primary Realtime Clock</Description><StartTime><Timestamp dt:dt="int">0</Timestamp><DateUtc dt:dt="string">2021-12-17T01:46:23Z</DateUtc></StartTime><FrequencyChanges><FrequencyChange><Frequency dt:dt="r8">10000000</Frequency><Timestamp dt:dt="r8">583939301381</Timestamp><Current dt:dt…	60.007	1.0.0.33	1	-175485389	2.0.10.182	12-17-2021	2021-12-17 01:46:23	09:46:23	2.0.10.92	1	affpro	WordList	1	1	1	110	NULL	j	NULL	NULL	4	NULL	NULL	NULL	NULL	NULL	NULL	NULL	NULL	2	14	14	pra3	practiceList2	转基因食物+有争议的	NULL	NULL	NULL	NULL	NULL	NULL	NULL	NULL	NULL	NULL	NULL
大创GO-NOGO	1	1	<?xml version="1.0"?>\n<Clock xmlns:dt="urn:schemas-microsoft-com:datatypes"><Description dt:dt="string">E-Prime Primary Realtime Clock</Description><StartTime><Timestamp dt:dt="int">0</Timestamp><DateUtc dt:dt="string">2021-12-17T01:46:23Z</DateUtc></StartTime><FrequencyChanges><FrequencyChange><Frequency dt:dt="r8">10000000</Frequency><Timestamp dt:dt="r8">583939301381</Timestamp><Current dt:dt…	60.007	1.0.0.33	1	-175485389	2.0.10.182	12-17-2021	2021-12-17 01:46:23	09:46:23	2.0.10.92	1	affpro	WordList	1	1	1	111	NULL	j	NULL	NULL	14	NULL	NULL	NULL	NULL	NULL	NULL	NULL	NULL	2	15	15	pra3	practiceList2	动物转基因+高风险的	NULL	NULL	NULL	NULL	NULL	NULL	NULL	NULL	NULL	NULL	NULL
大创GO-NOGO	1	1	<?xml version="1.0"?>\n<Clock xmlns:dt="urn:schemas-microsoft-com:datatypes"><Description dt:dt="string">E-Prime Primary Realtime Clock</Description><StartTime><Timestamp dt:dt="int">0</Timestamp><DateUtc dt:dt="string">2021-12-17T01:46:23Z</DateUtc></StartTime><FrequencyChanges><FrequencyChange><Frequency dt:dt="r8">10000000</Frequency><Timestamp dt:dt="r8">583939301381</Timestamp><Current dt:dt…	60.007	1.0.0.33	1	-175485389	2.0.10.182	12-17-2021	2021-12-17 01:46:23	09:46:23	2.0.10.92	1	affpro	WordList	1	1	1	112	NULL		NULL	NULL	NULL	NULL	NULL	NULL	8	NULL	NULL	NULL	NULL	1	16	16	pra3	practiceList2	抗虫害棉花+创新的	NULL	NULL	NULL	NULL	NULL	NULL	NULL	NULL	NULL	NULL	NULL
大创GO-NOGO	1	1	<?xml version="1.0"?>\n<Clock xmlns:dt="urn:schemas-microsoft-com:datatypes"><Description dt:dt="string">E-Prime Primary Realtime Clock</Description><StartTime><Timestamp dt:dt="int">0</Timestamp><DateUtc dt:dt="string">2021-12-17T01:46:23Z</DateUtc></StartTime><FrequencyChanges><FrequencyChange><Frequency dt:dt="r8">10000000</Frequency><Timestamp dt:dt="r8">583939301381</Timestamp><Current dt:dt…	60.007	1.0.0.33	1	-175485389	2.0.10.182	12-17-2021	2021-12-17 01:46:23	09:46:23	2.0.10.92	1	affpro	WordList	1	1	1	113	NULL		NULL	NULL	NULL	NULL	NULL	NULL	14	NULL	NULL	NULL	NULL	1	17	17	pra3	practiceList2	动物转基因+高产的	NULL	NULL	NULL	NULL	NULL	NULL	NULL	NULL	NULL	NULL	NULL
大创GO-NOGO	1	1	<?xml version="1.0"?>\n<Clock xmlns:dt="urn:schemas-microsoft-com:datatypes"><Description dt:dt="string">E-Prime Primary Realtime Clock</Description><StartTime><Timestamp dt:dt="int">0</Timestamp><DateUtc dt:dt="string">2021-12-17T01:46:23Z</DateUtc></StartTime><FrequencyChanges><FrequencyChange><Frequency dt:dt="r8">10000000</Frequency><Timestamp dt:dt="r8">583939301381</Timestamp><Current dt:dt…	60.007	1.0.0.33	1	-175485389	2.0.10.182	12-17-2021	2021-12-17 01:46:23	09:46:23	2.0.10.92	1	affpro	WordList	1	1	1	114	NULL		NULL	NULL	NULL	NULL	NULL	NULL	3	NULL	NULL	NULL	NULL	1	18	18	pra3	practiceList2	转基因食物+高科技的	NULL	NULL	NULL	NULL	NULL	NULL	NULL	NULL	NULL	NULL	NULL
大创GO-NOGO	1	1	<?xml version="1.0"?>\n<Clock xmlns:dt="urn:schemas-microsoft-com:datatypes"><Description dt:dt="string">E-Prime Primary Realtime Clock</Description><StartTime><Timestamp dt:dt="int">0</Timestamp><DateUtc dt:dt="string">2021-12-17T01:46:23Z</DateUtc></StartTime><FrequencyChanges><FrequencyChange><Frequency dt:dt="r8">10000000</Frequency><Timestamp dt:dt="r8">583939301381</Timestamp><Current dt:dt…	60.007	1.0.0.33	1	-175485389	2.0.10.182	12-17-2021	2021-12-17 01:46:23	09:46:23	2.0.10.92	1	affpro	WordList	1	1	1	115	NULL		NULL	NULL	NULL	NULL	NULL	NULL	1	NULL	NULL	NULL	NULL	1	19	19	pra3	practiceList2	转基因食物+科学的	NULL	NULL	NULL	NULL	NULL	NULL	NULL	NULL	NULL	NULL	NULL
大创GO-NOGO	1	1	<?xml version="1.0"?>\n<Clock xmlns:dt="urn:schemas-microsoft-com:datatypes"><Description dt:dt="string">E-Prime Primary Realtime Clock</Description><StartTime><Timestamp dt:dt="int">0</Timestamp><DateUtc dt:dt="string">2021-12-17T01:46:23Z</DateUtc></StartTime><FrequencyChanges><FrequencyChange><Frequency dt:dt="r8">10000000</Frequency><Timestamp dt:dt="r8">583939301381</Timestamp><Current dt:dt…	60.007	1.0.0.33	1	-175485389	2.0.10.182	12-17-2021	2021-12-17 01:46:23	09:46:23	2.0.10.92	1	affpro	WordList	1	1	1	116	NULL	j	NULL	NULL	9	NULL	NULL	NULL	NULL	NULL	NULL	NULL	NULL	2	20	20	pra3	practiceList2	转基因大豆+不成熟的	NULL	NULL	NULL	NULL	NULL	NULL	NULL	NULL	NULL	NULL	NULL
大创GO-NOGO	1	1	<?xml version="1.0"?>\n<Clock xmlns:dt="urn:schemas-microsoft-com:datatypes"><Description dt:dt="string">E-Prime Primary Realtime Clock</Description><StartTime><Timestamp dt:dt="int">0</Timestamp><DateUtc dt:dt="string">2021-12-17T01:46:23Z</DateUtc></StartTime><FrequencyChanges><FrequencyChange><Frequency dt:dt="r8">10000000</Frequency><Timestamp dt:dt="r8">583939301381</Timestamp><Current dt:dt…	60.007	1.0.0.33	1	-175485389	2.0.10.182	12-17-2021	2021-12-17 01:46:23	09:46:23	2.0.10.92	1	affpro	WordList	1	1	1	117	NULL	j	NULL	NULL	1	NULL	NULL	NULL	NULL	NULL	NULL	NULL	NULL	2	21	21	pra3	practiceList2	转基因食物+不成熟的	NULL	NULL	NULL	NULL	NULL	NULL	NULL	NULL	NULL	NULL	NULL
大创GO-NOGO	1	1	<?xml version="1.0"?>\n<Clock xmlns:dt="urn:schemas-microsoft-com:datatypes"><Description dt:dt="string">E-Prime Primary Realtime Clock</Description><StartTime><Timestamp dt:dt="int">0</Timestamp><DateUtc dt:dt="string">2021-12-17T01:46:23Z</DateUtc></StartTime><FrequencyChanges><FrequencyChange><Frequency dt:dt="r8">10000000</Frequency><Timestamp dt:dt="r8">583939301381</Timestamp><Current dt:dt…	60.007	1.0.0.33	1	-175485389	2.0.10.182	12-17-2021	2021-12-17 01:46:23	09:46:23	2.0.10.92	1	affpro	WordList	1	1	1	118	NULL	j	NULL	NULL	11	NULL	NULL	NULL	NULL	NULL	NULL	NULL	NULL	2	22	22	pra3	practiceList2	转基因大豆+非天然的	NULL	NULL	NULL	NULL	NULL	NULL	NULL	NULL	NULL	NULL	NULL
大创GO-NOGO	1	1	<?xml version="1.0"?>\n<Clock xmlns:dt="urn:schemas-microsoft-com:datatypes"><Description dt:dt="string">E-Prime Primary Realtime Clock</Description><StartTime><Timestamp dt:dt="int">0</Timestamp><DateUtc dt:dt="string">2021-12-17T01:46:23Z</DateUtc></StartTime><FrequencyChanges><FrequencyChange><Frequency dt:dt="r8">10000000</Frequency><Timestamp dt:dt="r8">583939301381</Timestamp><Current dt:dt…	60.007	1.0.0.33	1	-175485389	2.0.10.182	12-17-2021	2021-12-17 01:46:23	09:46:23	2.0.10.92	1	affpro	WordList	1	1	1	119	NULL	j	NULL	NULL	13	NULL	NULL	NULL	NULL	NULL	NULL	NULL	NULL	2	23	23	pra3	practiceList2	动物转基因+不成熟的	NULL	NULL	NULL	NULL	NULL	NULL	NULL	NULL	NULL	NULL	NULL
大创GO-NOGO	1	1	<?xml version="1.0"?>\n<Clock xmlns:dt="urn:schemas-microsoft-com:datatypes"><Description dt:dt="string">E-Prime Primary Realtime Clock</Description><StartTime><Timestamp dt:dt="int">0</Timestamp><DateUtc dt:dt="string">2021-12-17T01:46:23Z</DateUtc></StartTime><FrequencyChanges><FrequencyChange><Frequency dt:dt="r8">10000000</Frequency><Timestamp dt:dt="r8">583939301381</Timestamp><Current dt:dt…	60.007	1.0.0.33	1	-175485389	2.0.10.182	12-17-2021	2021-12-17 01:46:23	09:46:23	2.0.10.92	1	affpro	WordList	1	1	1	120	NULL	j	NULL	NULL	7	NULL	NULL	NULL	NULL	NULL	NULL	NULL	NULL	2	24	24	pra3	practiceList2	抗虫害棉花+非天然的	NULL	NULL	NULL	NULL	NULL	NULL	NULL	NULL	NULL	NULL	NULL
大创GO-NOGO	1	1	<?xml version="1.0"?>\n<Clock xmlns:dt="urn:schemas-microsoft-com:datatypes"><Description dt:dt="string">E-Prime Primary Realtime Clock</Description><StartTime><Timestamp dt:dt="int">0</Timestamp><DateUtc dt:dt="string">2021-12-17T01:46:23Z</DateUtc></StartTime><FrequencyChanges><FrequencyChange><Frequency dt:dt="r8">10000000</Frequency><Timestamp dt:dt="r8">583939301381</Timestamp><Current dt:dt…	60.007	1.0.0.33	1	-175485389	2.0.10.182	12-17-2021	2021-12-17 01:46:23	09:46:23	2.0.10.92	1	affpro	WordList	1	1	1	121	NULL	j	NULL	NULL	NULL	16	NULL	NULL	NULL	NULL	NULL	NULL	NULL	NULL	NULL	NULL	pra4	taskList2	动物转基因+有争议的	NULL	NULL	NULL	NULL	NULL	NULL	NULL	NULL	NULL	NULL	NULL
大创GO-NOGO	1	1	<?xml version="1.0"?>\n<Clock xmlns:dt="urn:schemas-microsoft-com:datatypes"><Description dt:dt="string">E-Prime Primary Realtime Clock</Description><StartTime><Timestamp dt:dt="int">0</Timestamp><DateUtc dt:dt="string">2021-12-17T01:46:23Z</DateUtc></StartTime><FrequencyChanges><FrequencyChange><Frequency dt:dt="r8">10000000</Frequency><Timestamp dt:dt="r8">583939301381</Timestamp><Current dt:dt…	60.007	1.0.0.33	1	-175485389	2.0.10.182	12-17-2021	2021-12-17 01:46:23	09:46:23	2.0.10.92	1	affpro	WordList	1	1	1	122	NULL		NULL	NULL	NULL	NULL	NULL	NULL	NULL	10	NULL	NULL	NULL	NULL	NULL	NULL	pra4	taskList2	转基因大豆+高产的	NULL	NULL	NULL	NULL	NULL	NULL	NULL	NULL	NULL	NULL	NULL
大创GO-NOGO	1	1	<?xml version="1.0"?>\n<Clock xmlns:dt="urn:schemas-microsoft-com:datatypes"><Description dt:dt="string">E-Prime Primary Realtime Clock</Description><StartTime><Timestamp dt:dt="int">0</Timestamp><DateUtc dt:dt="string">2021-12-17T01:46:23Z</DateUtc></StartTime><FrequencyChanges><FrequencyChange><Frequency dt:dt="r8">10000000</Frequency><Timestamp dt:dt="r8">583939301381</Timestamp><Current dt:dt…	60.007	1.0.0.33	1	-175485389	2.0.10.182	12-17-2021	2021-12-17 01:46:23	09:46:23	2.0.10.92	1	affpro	WordList	1	1	1	123	NULL	j	NULL	NULL	NULL	14	NULL	NULL	NULL	NULL	NULL	NULL	NULL	NULL	NULL	NULL	pra4	taskList2	动物转基因+高风险的	NULL	NULL	NULL	NULL	NULL	NULL	NULL	NULL	NULL	NULL	NULL
大创GO-NOGO	1	1	<?xml version="1.0"?>\n<Clock xmlns:dt="urn:schemas-microsoft-com:datatypes"><Description dt:dt="string">E-Prime Primary Realtime Clock</Description><StartTime><Timestamp dt:dt="int">0</Timestamp><DateUtc dt:dt="string">2021-12-17T01:46:23Z</DateUtc></StartTime><FrequencyChanges><FrequencyChange><Frequency dt:dt="r8">10000000</Frequency><Timestamp dt:dt="r8">583939301381</Timestamp><Current dt:dt…	60.007	1.0.0.33	1	-175485389	2.0.10.182	12-17-2021	2021-12-17 01:46:23	09:46:23	2.0.10.92	1	affpro	WordList	1	1	1	124	NULL		NULL	NULL	NULL	NULL	NULL	NULL	NULL	15	NULL	NULL	NULL	NULL	NULL	NULL	pra4	taskList2	动物转基因+高科技的	NULL	NULL	NULL	NULL	NULL	NULL	NULL	NULL	NULL	NULL	NULL
大创GO-NOGO	1	1	<?xml version="1.0"?>\n<Clock xmlns:dt="urn:schemas-microsoft-com:datatypes"><Description dt:dt="string">E-Prime Primary Realtime Clock</Description><StartTime><Timestamp dt:dt="int">0</Timestamp><DateUtc dt:dt="string">2021-12-17T01:46:23Z</DateUtc></StartTime><FrequencyChanges><FrequencyChange><Frequency dt:dt="r8">10000000</Frequency><Timestamp dt:dt="r8">583939301381</Timestamp><Current dt:dt…	60.007	1.0.0.33	1	-175485389	2.0.10.182	12-17-2021	2021-12-17 01:46:23	09:46:23	2.0.10.92	1	affpro	WordList	1	1	1	125	NULL		NULL	NULL	NULL	NULL	NULL	NULL	NULL	5	NULL	NULL	NULL	NULL	NULL	NULL	pra4	taskList2	抗虫害棉花+科学的	NULL	NULL	NULL	NULL	NULL	NULL	NULL	NULL	NULL	NULL	NULL
大创GO-NOGO	1	1	<?xml version="1.0"?>\n<Clock xmlns:dt="urn:schemas-microsoft-com:datatypes"><Description dt:dt="string">E-Prime Primary Realtime Clock</Description><StartTime><Timestamp dt:dt="int">0</Timestamp><DateUtc dt:dt="string">2021-12-17T01:46:23Z</DateUtc></StartTime><FrequencyChanges><FrequencyChange><Frequency dt:dt="r8">10000000</Frequency><Timestamp dt:dt="r8">583939301381</Timestamp><Current dt:dt…	60.007	1.0.0.33	1	-175485389	2.0.10.182	12-17-2021	2021-12-17 01:46:23	09:46:23	2.0.10.92	1	affpro	WordList	1	1	1	126	NULL	j	NULL	NULL	NULL	12	NULL	NULL	NULL	NULL	NULL	NULL	NULL	NULL	NULL	NULL	pra4	taskList2	转基因大豆+有争议的	NULL	NULL	NULL	NULL	NULL	NULL	NULL	NULL	NULL	NULL	NULL
大创GO-NOGO	1	1	<?xml version="1.0"?>\n<Clock xmlns:dt="urn:schemas-microsoft-com:datatypes"><Description dt:dt="string">E-Prime Primary Realtime Clock</Description><StartTime><Timestamp dt:dt="int">0</Timestamp><DateUtc dt:dt="string">2021-12-17T01:46:23Z</DateUtc></StartTime><FrequencyChanges><FrequencyChange><Frequency dt:dt="r8">10000000</Frequency><Timestamp dt:dt="r8">583939301381</Timestamp><Current dt:dt…	60.007	1.0.0.33	1	-175485389	2.0.10.182	12-17-2021	2021-12-17 01:46:23	09:46:23	2.0.10.92	1	affpro	WordList	1	1	1	127	NULL	j	NULL	NULL	NULL	11	NULL	NULL	NULL	NULL	NULL	NULL	NULL	NULL	NULL	NULL	pra4	taskList2	转基因大豆+非天然的	NULL	NULL	NULL	NULL	NULL	NULL	NULL	NULL	NULL	NULL	NULL
大创GO-NOGO	1	1	<?xml version="1.0"?>\n<Clock xmlns:dt="urn:schemas-microsoft-com:datatypes"><Description dt:dt="string">E-Prime Primary Realtime Clock</Description><StartTime><Timestamp dt:dt="int">0</Timestamp><DateUtc dt:dt="string">2021-12-17T01:46:23Z</DateUtc></StartTime><FrequencyChanges><FrequencyChange><Frequency dt:dt="r8">10000000</Frequency><Timestamp dt:dt="r8">583939301381</Timestamp><Current dt:dt…	60.007	1.0.0.33	1	-175485389	2.0.10.182	12-17-2021	2021-12-17 01:46:23	09:46:23	2.0.10.92	1	affpro	WordList	1	1	1	128	NULL		NULL	NULL	NULL	NULL	NULL	NULL	NULL	7	NULL	NULL	NULL	NULL	NULL	NULL	pra4	taskList2	抗虫害棉花+高科技的	NULL	NULL	NULL	NULL	NULL	NULL	NULL	NULL	NULL	NULL	NULL
大创GO-NOGO	1	1	<?xml version="1.0"?>\n<Clock xmlns:dt="urn:schemas-microsoft-com:datatypes"><Description dt:dt="string">E-Prime Primary Realtime Clock</Description><StartTime><Timestamp dt:dt="int">0</Timestamp><DateUtc dt:dt="string">2021-12-17T01:46:23Z</DateUtc></StartTime><FrequencyChanges><FrequencyChange><Frequency dt:dt="r8">10000000</Frequency><Timestamp dt:dt="r8">583939301381</Timestamp><Current dt:dt…	60.007	1.0.0.33	1	-175485389	2.0.10.182	12-17-2021	2021-12-17 01:46:23	09:46:23	2.0.10.92	1	affpro	WordList	1	1	1	129	NULL	j	NULL	NULL	NULL	2	NULL	NULL	NULL	NULL	NULL	NULL	NULL	NULL	NULL	NULL	pra4	taskList2	转基因食物+高风险的	NULL	NULL	NULL	NULL	NULL	NULL	NULL	NULL	NULL	NULL	NULL
大创GO-NOGO	1	1	<?xml version="1.0"?>\n<Clock xmlns:dt="urn:schemas-microsoft-com:datatypes"><Description dt:dt="string">E-Prime Primary Realtime Clock</Description><StartTime><Timestamp dt:dt="int">0</Timestamp><DateUtc dt:dt="string">2021-12-17T01:46:23Z</DateUtc></StartTime><FrequencyChanges><FrequencyChange><Frequency dt:dt="r8">10000000</Frequency><Timestamp dt:dt="r8">583939301381</Timestamp><Current dt:dt…	60.007	1.0.0.33	1	-175485389	2.0.10.182	12-17-2021	2021-12-17 01:46:23	09:46:23	2.0.10.92	1	affpro	WordList	1	1	1	130	NULL		NULL	NULL	NULL	NULL	NULL	NULL	NULL	3	NULL	NULL	NULL	NULL	NULL	NULL	pra4	taskList2	转基因食物+高科技的	NULL	NULL	NULL	NULL	NULL	NULL	NULL	NULL	NULL	NULL	NULL
大创GO-NOGO	1	1	<?xml version="1.0"?>\n<Clock xmlns:dt="urn:schemas-microsoft-com:datatypes"><Description dt:dt="string">E-Prime Primary Realtime Clock</Description><StartTime><Timestamp dt:dt="int">0</Timestamp><DateUtc dt:dt="string">2021-12-17T01:46:23Z</DateUtc></StartTime><FrequencyChanges><FrequencyChange><Frequency dt:dt="r8">10000000</Frequency><Timestamp dt:dt="r8">583939301381</Timestamp><Current dt:dt…	60.007	1.0.0.33	1	-175485389	2.0.10.182	12-17-2021	2021-12-17 01:46:23	09:46:23	2.0.10.92	1	affpro	WordList	1	1	1	131	NULL		NULL	NULL	NULL	NULL	NULL	NULL	NULL	8	NULL	NULL	NULL	NULL	NULL	NULL	pra4	taskList2	抗虫害棉花+创新的	NULL	NULL	NULL	NULL	NULL	NULL	NULL	NULL	NULL	NULL	NULL
大创GO-NOGO	1	1	<?xml version="1.0"?>\n<Clock xmlns:dt="urn:schemas-microsoft-com:datatypes"><Description dt:dt="string">E-Prime Primary Realtime Clock</Description><StartTime><Timestamp dt:dt="int">0</Timestamp><DateUtc dt:dt="string">2021-12-17T01:46:23Z</DateUtc></StartTime><FrequencyChanges><FrequencyChange><Frequency dt:dt="r8">10000000</Frequency><Timestamp dt:dt="r8">583939301381</Timestamp><Current dt:dt…	60.007	1.0.0.33	1	-175485389	2.0.10.182	12-17-2021	2021-12-17 01:46:23	09:46:23	2.0.10.92	1	affpro	WordList	1	1	1	132	NULL		NULL	NULL	NULL	NULL	NULL	NULL	NULL	1	NULL	NULL	NULL	NULL	NULL	NULL	pra4	taskList2	转基因食物+科学的	NULL	NULL	NULL	NULL	NULL	NULL	NULL	NULL	NULL	NULL	NULL
大创GO-NOGO	1	1	<?xml version="1.0"?>\n<Clock xmlns:dt="urn:schemas-microsoft-com:datatypes"><Description dt:dt="string">E-Prime Primary Realtime Clock</Description><StartTime><Timestamp dt:dt="int">0</Timestamp><DateUtc dt:dt="string">2021-12-17T01:46:23Z</DateUtc></StartTime><FrequencyChanges><FrequencyChange><Frequency dt:dt="r8">10000000</Frequency><Timestamp dt:dt="r8">583939301381</Timestamp><Current dt:dt…	60.007	1.0.0.33	1	-175485389	2.0.10.182	12-17-2021	2021-12-17 01:46:23	09:46:23	2.0.10.92	1	affpro	WordList	1	1	1	133	NULL		NULL	NULL	NULL	NULL	NULL	NULL	NULL	4	NULL	NULL	NULL	NULL	NULL	NULL	pra4	taskList2	转基因食物+创新的	NULL	NULL	NULL	NULL	NULL	NULL	NULL	NULL	NULL	NULL	NULL
大创GO-NOGO	1	1	<?xml version="1.0"?>\n<Clock xmlns:dt="urn:schemas-microsoft-com:datatypes"><Description dt:dt="string">E-Prime Primary Realtime Clock</Description><StartTime><Timestamp dt:dt="int">0</Timestamp><DateUtc dt:dt="string">2021-12-17T01:46:23Z</DateUtc></StartTime><FrequencyChanges><FrequencyChange><Frequency dt:dt="r8">10000000</Frequency><Timestamp dt:dt="r8">583939301381</Timestamp><Current dt:dt…	60.007	1.0.0.33	1	-175485389	2.0.10.182	12-17-2021	2021-12-17 01:46:23	09:46:23	2.0.10.92	1	affpro	WordList	1	1	1	134	NULL		NULL	NULL	NULL	NULL	NULL	NULL	NULL	14	NULL	NULL	NULL	NULL	NULL	NULL	pra4	taskList2	动物转基因+高产的	NULL	NULL	NULL	NULL	NULL	NULL	NULL	NULL	NULL	NULL	NULL
大创GO-NOGO	1	1	<?xml version="1.0"?>\n<Clock xmlns:dt="urn:schemas-microsoft-com:datatypes"><Description dt:dt="string">E-Prime Primary Realtime Clock</Description><StartTime><Timestamp dt:dt="int">0</Timestamp><DateUtc dt:dt="string">2021-12-17T01:46:23Z</DateUtc></StartTime><FrequencyChanges><FrequencyChange><Frequency dt:dt="r8">10000000</Frequency><Timestamp dt:dt="r8">583939301381</Timestamp><Current dt:dt…	60.007	1.0.0.33	1	-175485389	2.0.10.182	12-17-2021	2021-12-17 01:46:23	09:46:23	2.0.10.92	1	affpro	WordList	1	1	1	135	NULL		NULL	NULL	NULL	NULL	NULL	NULL	NULL	13	NULL	NULL	NULL	NULL	NULL	NULL	pra4	taskList2	动物转基因+科学的	NULL	NULL	NULL	NULL	NULL	NULL	NULL	NULL	NULL	NULL	NULL
大创GO-NOGO	1	1	<?xml version="1.0"?>\n<Clock xmlns:dt="urn:schemas-microsoft-com:datatypes"><Description dt:dt="string">E-Prime Primary Realtime Clock</Description><StartTime><Timestamp dt:dt="int">0</Timestamp><DateUtc dt:dt="string">2021-12-17T01:46:23Z</DateUtc></StartTime><FrequencyChanges><FrequencyChange><Frequency dt:dt="r8">10000000</Frequency><Timestamp dt:dt="r8">583939301381</Timestamp><Current dt:dt…	60.007	1.0.0.33	1	-175485389	2.0.10.182	12-17-2021	2021-12-17 01:46:23	09:46:23	2.0.10.92	1	affpro	WordList	1	1	1	136	NULL		NULL	NULL	NULL	NULL	NULL	NULL	NULL	11	NULL	NULL	NULL	NULL	NULL	NULL	pra4	taskList2	转基因大豆+高科技的	NULL	NULL	NULL	NULL	NULL	NULL	NULL	NULL	NULL	NULL	NULL
大创GO-NOGO	1	1	<?xml version="1.0"?>\n<Clock xmlns:dt="urn:schemas-microsoft-com:datatypes"><Description dt:dt="string">E-Prime Primary Realtime Clock</Description><StartTime><Timestamp dt:dt="int">0</Timestamp><DateUtc dt:dt="string">2021-12-17T01:46:23Z</DateUtc></StartTime><FrequencyChanges><FrequencyChange><Frequency dt:dt="r8">10000000</Frequency><Timestamp dt:dt="r8">583939301381</Timestamp><Current dt:dt…	60.007	1.0.0.33	1	-175485389	2.0.10.182	12-17-2021	2021-12-17 01:46:23	09:46:23	2.0.10.92	1	affpro	WordList	1	1	1	137	NULL	j	NULL	NULL	NULL	9	NULL	NULL	NULL	NULL	NULL	NULL	NULL	NULL	NULL	NULL	pra4	taskList2	转基因大豆+不成熟的	NULL	NULL	NULL	NULL	NULL	NULL	NULL	NULL	NULL	NULL	NULL
大创GO-NOGO	1	1	<?xml version="1.0"?>\n<Clock xmlns:dt="urn:schemas-microsoft-com:datatypes"><Description dt:dt="string">E-Prime Primary Realtime Clock</Description><StartTime><Timestamp dt:dt="int">0</Timestamp><DateUtc dt:dt="string">2021-12-17T01:46:23Z</DateUtc></StartTime><FrequencyChanges><FrequencyChange><Frequency dt:dt="r8">10000000</Frequency><Timestamp dt:dt="r8">583939301381</Timestamp><Current dt:dt…	60.007	1.0.0.33	1	-175485389	2.0.10.182	12-17-2021	2021-12-17 01:46:23	09:46:23	2.0.10.92	1	affpro	WordList	1	1	1	138	NULL		NULL	NULL	NULL	NULL	NULL	NULL	NULL	16	NULL	NULL	NULL	NULL	NULL	NULL	pra4	taskList2	动物转基因+创新的	NULL	NULL	NULL	NULL	NULL	NULL	NULL	NULL	NULL	NULL	NULL
大创GO-NOGO	1	1	<?xml version="1.0"?>\n<Clock xmlns:dt="urn:schemas-microsoft-com:datatypes"><Description dt:dt="string">E-Prime Primary Realtime Clock</Description><StartTime><Timestamp dt:dt="int">0</Timestamp><DateUtc dt:dt="string">2021-12-17T01:46:23Z</DateUtc></StartTime><FrequencyChanges><FrequencyChange><Frequency dt:dt="r8">10000000</Frequency><Timestamp dt:dt="r8">583939301381</Timestamp><Current dt:dt…	60.007	1.0.0.33	1	-175485389	2.0.10.182	12-17-2021	2021-12-17 01:46:23	09:46:23	2.0.10.92	1	affpro	WordList	1	1	1	139	NULL	j	NULL	NULL	NULL	15	NULL	NULL	NULL	NULL	NULL	NULL	NULL	NULL	NULL	NULL	pra4	taskList2	动物转基因+非天然的	NULL	NULL	NULL	NULL	NULL	NULL	NULL	NULL	NULL	NULL	NULL
大创GO-NOGO	1	1	<?xml version="1.0"?>\n<Clock xmlns:dt="urn:schemas-microsoft-com:datatypes"><Description dt:dt="string">E-Prime Primary Realtime Clock</Description><StartTime><Timestamp dt:dt="int">0</Timestamp><DateUtc dt:dt="string">2021-12-17T01:46:23Z</DateUtc></StartTime><FrequencyChanges><FrequencyChange><Frequency dt:dt="r8">10000000</Frequency><Timestamp dt:dt="r8">583939301381</Timestamp><Current dt:dt…	60.007	1.0.0.33	1	-175485389	2.0.10.182	12-17-2021	2021-12-17 01:46:23	09:46:23	2.0.10.92	1	affpro	WordList	1	1	1	140	NULL		NULL	NULL	NULL	NULL	NULL	NULL	NULL	9	NULL	NULL	NULL	NULL	NULL	NULL	pra4	taskList2	转基因大豆+科学的	NULL	NULL	NULL	NULL	NULL	NULL	NULL	NULL	NULL	NULL	NULL
大创GO-NOGO	1	1	<?xml version="1.0"?>\n<Clock xmlns:dt="urn:schemas-microsoft-com:datatypes"><Description dt:dt="string">E-Prime Primary Realtime Clock</Description><StartTime><Timestamp dt:dt="int">0</Timestamp><DateUtc dt:dt="string">2021-12-17T01:46:23Z</DateUtc></StartTime><FrequencyChanges><FrequencyChange><Frequency dt:dt="r8">10000000</Frequency><Timestamp dt:dt="r8">583939301381</Timestamp><Current dt:dt…	60.007	1.0.0.33	1	-175485389	2.0.10.182	12-17-2021	2021-12-17 01:46:23	09:46:23	2.0.10.92	1	affpro	WordList	1	1	1	141	NULL		NULL	NULL	NULL	NULL	NULL	NULL	NULL	6	NULL	NULL	NULL	NULL	NULL	NULL	pra4	taskList2	抗虫害棉花+高产的	NULL	NULL	NULL	NULL	NULL	NULL	NULL	NULL	NULL	NULL	NULL
大创GO-NOGO	1	1	<?xml version="1.0"?>\n<Clock xmlns:dt="urn:schemas-microsoft-com:datatypes"><Description dt:dt="string">E-Prime Primary Realtime Clock</Description><StartTime><Timestamp dt:dt="int">0</Timestamp><DateUtc dt:dt="string">2021-12-17T01:46:23Z</DateUtc></StartTime><FrequencyChanges><FrequencyChange><Frequency dt:dt="r8">10000000</Frequency><Timestamp dt:dt="r8">583939301381</Timestamp><Current dt:dt…	60.007	1.0.0.33	1	-175485389	2.0.10.182	12-17-2021	2021-12-17 01:46:23	09:46:23	2.0.10.92	1	affpro	WordList	1	1	1	142	NULL	j	NULL	NULL	NULL	1	NULL	NULL	NULL	NULL	NULL	NULL	NULL	NULL	NULL	NULL	pra4	taskList2	转基因食物+不成熟的	NULL	NULL	NULL	NULL	NULL	NULL	NULL	NULL	NULL	NULL	NULL
大创GO-NOGO	1	1	<?xml version="1.0"?>\n<Clock xmlns:dt="urn:schemas-microsoft-com:datatypes"><Description dt:dt="string">E-Prime Primary Realtime Clock</Description><StartTime><Timestamp dt:dt="int">0</Timestamp><DateUtc dt:dt="string">2021-12-17T01:46:23Z</DateUtc></StartTime><FrequencyChanges><FrequencyChange><Frequency dt:dt="r8">10000000</Frequency><Timestamp dt:dt="r8">583939301381</Timestamp><Current dt:dt…	60.007	1.0.0.33	1	-175485389	2.0.10.182	12-17-2021	2021-12-17 01:46:23	09:46:23	2.0.10.92	1	affpro	WordList	1	1	1	143	NULL		NULL	NULL	NULL	NULL	NULL	NULL	NULL	12	NULL	NULL	NULL	NULL	NULL	NULL	pra4	taskList2	转基因大豆+创新的	NULL	NULL	NULL	NULL	NULL	NULL	NULL	NULL	NULL	NULL	NULL
大创GO-NOGO	1	1	<?xml version="1.0"?>\n<Clock xmlns:dt="urn:schemas-microsoft-com:datatypes"><Description dt:dt="string">E-Prime Primary Realtime Clock</Description><StartTime><Timestamp dt:dt="int">0</Timestamp><DateUtc dt:dt="string">2021-12-17T01:46:23Z</DateUtc></StartTime><FrequencyChanges><FrequencyChange><Frequency dt:dt="r8">10000000</Frequency><Timestamp dt:dt="r8">583939301381</Timestamp><Current dt:dt…	60.007	1.0.0.33	1	-175485389	2.0.10.182	12-17-2021	2021-12-17 01:46:23	09:46:23	2.0.10.92	1	affpro	WordList	1	1	1	144	NULL		NULL	NULL	NULL	NULL	NULL	NULL	NULL	2	NULL	NULL	NULL	NULL	NULL	NULL	pra4	taskList2	转基因食物+高产的	NULL	NULL	NULL	NULL	NULL	NULL	NULL	NULL	NULL	NULL	NULL
大创GO-NOGO	1	1	<?xml version="1.0"?>\n<Clock xmlns:dt="urn:schemas-microsoft-com:datatypes"><Description dt:dt="string">E-Prime Primary Realtime Clock</Description><StartTime><Timestamp dt:dt="int">0</Timestamp><DateUtc dt:dt="string">2021-12-17T01:46:23Z</DateUtc></StartTime><FrequencyChanges><FrequencyChange><Frequency dt:dt="r8">10000000</Frequency><Timestamp dt:dt="r8">583939301381</Timestamp><Current dt:dt…	60.007	1.0.0.33	1	-175485389	2.0.10.182	12-17-2021	2021-12-17 01:46:23	09:46:23	2.0.10.92	1	affpro	WordList	1	1	1	145	NULL		NULL	NULL	NULL	NULL	NULL	NULL	NULL	1	NULL	NULL	NULL	NULL	NULL	NULL	pra4	taskList2	转基因食物+科学的	NULL	NULL	NULL	NULL	NULL	NULL	NULL	NULL	NULL	NULL	NULL
大创GO-NOGO	1	1	<?xml version="1.0"?>\n<Clock xmlns:dt="urn:schemas-microsoft-com:datatypes"><Description dt:dt="string">E-Prime Primary Realtime Clock</Description><StartTime><Timestamp dt:dt="int">0</Timestamp><DateUtc dt:dt="string">2021-12-17T01:46:23Z</DateUtc></StartTime><FrequencyChanges><FrequencyChange><Frequency dt:dt="r8">10000000</Frequency><Timestamp dt:dt="r8">583939301381</Timestamp><Current dt:dt…	60.007	1.0.0.33	1	-175485389	2.0.10.182	12-17-2021	2021-12-17 01:46:23	09:46:23	2.0.10.92	1	affpro	WordList	1	1	1	146	NULL		NULL	NULL	NULL	NULL	NULL	NULL	NULL	11	NULL	NULL	NULL	NULL	NULL	NULL	pra4	taskList2	转基因大豆+高科技的	NULL	NULL	NULL	NULL	NULL	NULL	NULL	NULL	NULL	NULL	NULL
大创GO-NOGO	1	1	<?xml version="1.0"?>\n<Clock xmlns:dt="urn:schemas-microsoft-com:datatypes"><Description dt:dt="string">E-Prime Primary Realtime Clock</Description><StartTime><Timestamp dt:dt="int">0</Timestamp><DateUtc dt:dt="string">2021-12-17T01:46:23Z</DateUtc></StartTime><FrequencyChanges><FrequencyChange><Frequency dt:dt="r8">10000000</Frequency><Timestamp dt:dt="r8">583939301381</Timestamp><Current dt:dt…	60.007	1.0.0.33	1	-175485389	2.0.10.182	12-17-2021	2021-12-17 01:46:23	09:46:23	2.0.10.92	1	affpro	WordList	1	1	1	147	NULL		NULL	NULL	NULL	NULL	NULL	NULL	NULL	2	NULL	NULL	NULL	NULL	NULL	NULL	pra4	taskList2	转基因食物+高产的	NULL	NULL	NULL	NULL	NULL	NULL	NULL	NULL	NULL	NULL	NULL
大创GO-NOGO	1	1	<?xml version="1.0"?>\n<Clock xmlns:dt="urn:schemas-microsoft-com:datatypes"><Description dt:dt="string">E-Prime Primary Realtime Clock</Description><StartTime><Timestamp dt:dt="int">0</Timestamp><DateUtc dt:dt="string">2021-12-17T01:46:23Z</DateUtc></StartTime><FrequencyChanges><FrequencyChange><Frequency dt:dt="r8">10000000</Frequency><Timestamp dt:dt="r8">583939301381</Timestamp><Current dt:dt…	60.007	1.0.0.33	1	-175485389	2.0.10.182	12-17-2021	2021-12-17 01:46:23	09:46:23	2.0.10.92	1	affpro	WordList	1	1	1	148	NULL	j	NULL	NULL	NULL	4	NULL	NULL	NULL	NULL	NULL	NULL	NULL	NULL	NULL	NULL	pra4	taskList2	转基因食物+有争议的	NULL	NULL	NULL	NULL	NULL	NULL	NULL	NULL	NULL	NULL	NULL
大创GO-NOGO	1	1	<?xml version="1.0"?>\n<Clock xmlns:dt="urn:schemas-microsoft-com:datatypes"><Description dt:dt="string">E-Prime Primary Realtime Clock</Description><StartTime><Timestamp dt:dt="int">0</Timestamp><DateUtc dt:dt="string">2021-12-17T01:46:23Z</DateUtc></StartTime><FrequencyChanges><FrequencyChange><Frequency dt:dt="r8">10000000</Frequency><Timestamp dt:dt="r8">583939301381</Timestamp><Current dt:dt…	60.007	1.0.0.33	1	-175485389	2.0.10.182	12-17-2021	2021-12-17 01:46:23	09:46:23	2.0.10.92	1	affpro	WordList	1	1	1	149	NULL		NULL	NULL	NULL	NULL	NULL	NULL	NULL	3	NULL	NULL	NULL	NULL	NULL	NULL	pra4	taskList2	转基因食物+高科技的	NULL	NULL	NULL	NULL	NULL	NULL	NULL	NULL	NULL	NULL	NULL
大创GO-NOGO	1	1	<?xml version="1.0"?>\n<Clock xmlns:dt="urn:schemas-microsoft-com:datatypes"><Description dt:dt="string">E-Prime Primary Realtime Clock</Description><StartTime><Timestamp dt:dt="int">0</Timestamp><DateUtc dt:dt="string">2021-12-17T01:46:23Z</DateUtc></StartTime><FrequencyChanges><FrequencyChange><Frequency dt:dt="r8">10000000</Frequency><Timestamp dt:dt="r8">583939301381</Timestamp><Current dt:dt…	60.007	1.0.0.33	1	-175485389	2.0.10.182	12-17-2021	2021-12-17 01:46:23	09:46:23	2.0.10.92	1	affpro	WordList	1	1	1	150	NULL	j	NULL	NULL	NULL	5	NULL	NULL	NULL	NULL	NULL	NULL	NULL	NULL	NULL	NULL	pra4	taskList2	抗虫害棉花+不成熟的	NULL	NULL	NULL	NULL	NULL	NULL	NULL	NULL	NULL	NULL	NULL
大创GO-NOGO	1	1	<?xml version="1.0"?>\n<Clock xmlns:dt="urn:schemas-microsoft-com:datatypes"><Description dt:dt="string">E-Prime Primary Realtime Clock</Description><StartTime><Timestamp dt:dt="int">0</Timestamp><DateUtc dt:dt="string">2021-12-17T01:46:23Z</DateUtc></StartTime><FrequencyChanges><FrequencyChange><Frequency dt:dt="r8">10000000</Frequency><Timestamp dt:dt="r8">583939301381</Timestamp><Current dt:dt…	60.007	1.0.0.33	1	-175485389	2.0.10.182	12-17-2021	2021-12-17 01:46:23	09:46:23	2.0.10.92	1	affpro	WordList	1	1	1	151	NULL		NULL	NULL	NULL	NULL	NULL	NULL	NULL	14	NULL	NULL	NULL	NULL	NULL	NULL	pra4	taskList2	动物转基因+高产的	NULL	NULL	NULL	NULL	NULL	NULL	NULL	NULL	NULL	NULL	NULL
大创GO-NOGO	1	1	<?xml version="1.0"?>\n<Clock xmlns:dt="urn:schemas-microsoft-com:datatypes"><Description dt:dt="string">E-Prime Primary Realtime Clock</Description><StartTime><Timestamp dt:dt="int">0</Timestamp><DateUtc dt:dt="string">2021-12-17T01:46:23Z</DateUtc></StartTime><FrequencyChanges><FrequencyChange><Frequency dt:dt="r8">10000000</Frequency><Timestamp dt:dt="r8">583939301381</Timestamp><Current dt:dt…	60.007	1.0.0.33	1	-175485389	2.0.10.182	12-17-2021	2021-12-17 01:46:23	09:46:23	2.0.10.92	1	affpro	WordList	1	1	1	152	NULL		NULL	NULL	NULL	NULL	NULL	NULL	NULL	9	NULL	NULL	NULL	NULL	NULL	NULL	pra4	taskList2	转基因大豆+科学的	NULL	NULL	NULL	NULL	NULL	NULL	NULL	NULL	NULL	NULL	NULL
大创GO-NOGO	1	1	<?xml version="1.0"?>\n<Clock xmlns:dt="urn:schemas-microsoft-com:datatypes"><Description dt:dt="string">E-Prime Primary Realtime Clock</Description><StartTime><Timestamp dt:dt="int">0</Timestamp><DateUtc dt:dt="string">2021-12-17T01:46:23Z</DateUtc></StartTime><FrequencyChanges><FrequencyChange><Frequency dt:dt="r8">10000000</Frequency><Timestamp dt:dt="r8">583939301381</Timestamp><Current dt:dt…	60.007	1.0.0.33	1	-175485389	2.0.10.182	12-17-2021	2021-12-17 01:46:23	09:46:23	2.0.10.92	1	affpro	WordList	1	1	1	153	NULL	j	NULL	NULL	NULL	3	NULL	NULL	NULL	NULL	NULL	NULL	NULL	NULL	NULL	NULL	pra4	taskList2	转基因食物+非天然的	NULL	NULL	NULL	NULL	NULL	NULL	NULL	NULL	NULL	NULL	NULL
大创GO-NOGO	1	1	<?xml version="1.0"?>\n<Clock xmlns:dt="urn:schemas-microsoft-com:datatypes"><Description dt:dt="string">E-Prime Primary Realtime Clock</Description><StartTime><Timestamp dt:dt="int">0</Timestamp><DateUtc dt:dt="string">2021-12-17T01:46:23Z</DateUtc></StartTime><FrequencyChanges><FrequencyChange><Frequency dt:dt="r8">10000000</Frequency><Timestamp dt:dt="r8">583939301381</Timestamp><Current dt:dt…	60.007	1.0.0.33	1	-175485389	2.0.10.182	12-17-2021	2021-12-17 01:46:23	09:46:23	2.0.10.92	1	affpro	WordList	1	1	1	154	NULL		NULL	NULL	NULL	NULL	NULL	NULL	NULL	15	NULL	NULL	NULL	NULL	NULL	NULL	pra4	taskList2	动物转基因+高科技的	NULL	NULL	NULL	NULL	NULL	NULL	NULL	NULL	NULL	NULL	NULL
大创GO-NOGO	1	1	<?xml version="1.0"?>\n<Clock xmlns:dt="urn:schemas-microsoft-com:datatypes"><Description dt:dt="string">E-Prime Primary Realtime Clock</Description><StartTime><Timestamp dt:dt="int">0</Timestamp><DateUtc dt:dt="string">2021-12-17T01:46:23Z</DateUtc></StartTime><FrequencyChanges><FrequencyChange><Frequency dt:dt="r8">10000000</Frequency><Timestamp dt:dt="r8">583939301381</Timestamp><Current dt:dt…	60.007	1.0.0.33	1	-175485389	2.0.10.182	12-17-2021	2021-12-17 01:46:23	09:46:23	2.0.10.92	1	affpro	WordList	1	1	1	155	NULL	j	NULL	NULL	NULL	6	NULL	NULL	NULL	NULL	NULL	NULL	NULL	NULL	NULL	NULL	pra4	taskList2	抗虫害棉花+高风险的	NULL	NULL	NULL	NULL	NULL	NULL	NULL	NULL	NULL	NULL	NULL
大创GO-NOGO	1	1	<?xml version="1.0"?>\n<Clock xmlns:dt="urn:schemas-microsoft-com:datatypes"><Description dt:dt="string">E-Prime Primary Realtime Clock</Description><StartTime><Timestamp dt:dt="int">0</Timestamp><DateUtc dt:dt="string">2021-12-17T01:46:23Z</DateUtc></StartTime><FrequencyChanges><FrequencyChange><Frequency dt:dt="r8">10000000</Frequency><Timestamp dt:dt="r8">583939301381</Timestamp><Current dt:dt…	60.007	1.0.0.33	1	-175485389	2.0.10.182	12-17-2021	2021-12-17 01:46:23	09:46:23	2.0.10.92	1	affpro	WordList	1	1	1	156	NULL		NULL	NULL	NULL	NULL	NULL	NULL	NULL	5	NULL	NULL	NULL	NULL	NULL	NULL	pra4	taskList2	抗虫害棉花+科学的	NULL	NULL	NULL	NULL	NULL	NULL	NULL	NULL	NULL	NULL	NULL
大创GO-NOGO	1	1	<?xml version="1.0"?>\n<Clock xmlns:dt="urn:schemas-microsoft-com:datatypes"><Description dt:dt="string">E-Prime Primary Realtime Clock</Description><StartTime><Timestamp dt:dt="int">0</Timestamp><DateUtc dt:dt="string">2021-12-17T01:46:23Z</DateUtc></StartTime><FrequencyChanges><FrequencyChange><Frequency dt:dt="r8">10000000</Frequency><Timestamp dt:dt="r8">583939301381</Timestamp><Current dt:dt…	60.007	1.0.0.33	1	-175485389	2.0.10.182	12-17-2021	2021-12-17 01:46:23	09:46:23	2.0.10.92	1	affpro	WordList	1	1	1	157	NULL	j	NULL	NULL	NULL	13	NULL	NULL	NULL	NULL	NULL	NULL	NULL	NULL	NULL	NULL	pra4	taskList2	动物转基因+不成熟的	NULL	NULL	NULL	NULL	NULL	NULL	NULL	NULL	NULL	NULL	NULL
大创GO-NOGO	1	1	<?xml version="1.0"?>\n<Clock xmlns:dt="urn:schemas-microsoft-com:datatypes"><Description dt:dt="string">E-Prime Primary Realtime Clock</Description><StartTime><Timestamp dt:dt="int">0</Timestamp><DateUtc dt:dt="string">2021-12-17T01:46:23Z</DateUtc></StartTime><FrequencyChanges><FrequencyChange><Frequency dt:dt="r8">10000000</Frequency><Timestamp dt:dt="r8">583939301381</Timestamp><Current dt:dt…	60.007	1.0.0.33	1	-175485389	2.0.10.182	12-17-2021	2021-12-17 01:46:23	09:46:23	2.0.10.92	1	affpro	WordList	1	1	1	158	NULL	j	NULL	NULL	NULL	10	NULL	NULL	NULL	NULL	NULL	NULL	NULL	NULL	NULL	NULL	pra4	taskList2	转基因大豆+高风险的	NULL	NULL	NULL	NULL	NULL	NULL	NULL	NULL	NULL	NULL	NULL
大创GO-NOGO	1	1	<?xml version="1.0"?>\n<Clock xmlns:dt="urn:schemas-microsoft-com:datatypes"><Description dt:dt="string">E-Prime Primary Realtime Clock</Description><StartTime><Timestamp dt:dt="int">0</Timestamp><DateUtc dt:dt="string">2021-12-17T01:46:23Z</DateUtc></StartTime><FrequencyChanges><FrequencyChange><Frequency dt:dt="r8">10000000</Frequency><Timestamp dt:dt="r8">583939301381</Timestamp><Current dt:dt…	60.007	1.0.0.33	1	-175485389	2.0.10.182	12-17-2021	2021-12-17 01:46:23	09:46:23	2.0.10.92	1	affpro	WordList	1	1	1	159	NULL	j	NULL	NULL	NULL	7	NULL	NULL	NULL	NULL	NULL	NULL	NULL	NULL	NULL	NULL	pra4	taskList2	抗虫害棉花+非天然的	NULL	NULL	NULL	NULL	NULL	NULL	NULL	NULL	NULL	NULL	NULL
大创GO-NOGO	1	1	<?xml version="1.0"?>\n<Clock xmlns:dt="urn:schemas-microsoft-com:datatypes"><Description dt:dt="string">E-Prime Primary Realtime Clock</Description><StartTime><Timestamp dt:dt="int">0</Timestamp><DateUtc dt:dt="string">2021-12-17T01:46:23Z</DateUtc></StartTime><FrequencyChanges><FrequencyChange><Frequency dt:dt="r8">10000000</Frequency><Timestamp dt:dt="r8">583939301381</Timestamp><Current dt:dt…	60.007	1.0.0.33	1	-175485389	2.0.10.182	12-17-2021	2021-12-17 01:46:23	09:46:23	2.0.10.92	1	affpro	WordList	1	1	1	160	NULL		NULL	NULL	NULL	NULL	NULL	NULL	NULL	16	NULL	NULL	NULL	NULL	NULL	NULL	pra4	taskList2	动物转基因+创新的	NULL	NULL	NULL	NULL	NULL	NULL	NULL	NULL	NULL	NULL	NULL
大创GO-NOGO	1	1	<?xml version="1.0"?>\n<Clock xmlns:dt="urn:schemas-microsoft-com:datatypes"><Description dt:dt="string">E-Prime Primary Realtime Clock</Description><StartTime><Timestamp dt:dt="int">0</Timestamp><DateUtc dt:dt="string">2021-12-17T01:46:23Z</DateUtc></StartTime><FrequencyChanges><FrequencyChange><Frequency dt:dt="r8">10000000</Frequency><Timestamp dt:dt="r8">583939301381</Timestamp><Current dt:dt…	60.007	1.0.0.33	1	-175485389	2.0.10.182	12-17-2021	2021-12-17 01:46:23	09:46:23	2.0.10.92	1	affpro	WordList	1	1	1	161	NULL		NULL	NULL	NULL	NULL	NULL	NULL	NULL	6	NULL	NULL	NULL	NULL	NULL	NULL	pra4	taskList2	抗虫害棉花+高产的	NULL	NULL	NULL	NULL	NULL	NULL	NULL	NULL	NULL	NULL	NULL
大创GO-NOGO	1	1	<?xml version="1.0"?>\n<Clock xmlns:dt="urn:schemas-microsoft-com:datatypes"><Description dt:dt="string">E-Prime Primary Realtime Clock</Description><StartTime><Timestamp dt:dt="int">0</Timestamp><DateUtc dt:dt="string">2021-12-17T01:46:23Z</DateUtc></StartTime><FrequencyChanges><FrequencyChange><Frequency dt:dt="r8">10000000</Frequency><Timestamp dt:dt="r8">583939301381</Timestamp><Current dt:dt…	60.007	1.0.0.33	1	-175485389	2.0.10.182	12-17-2021	2021-12-17 01:46:23	09:46:23	2.0.10.92	1	affpro	WordList	1	1	1	162	NULL		NULL	NULL	NULL	NULL	NULL	NULL	NULL	8	NULL	NULL	NULL	NULL	NULL	NULL	pra4	taskList2	抗虫害棉花+创新的	NULL	NULL	NULL	NULL	NULL	NULL	NULL	NULL	NULL	NULL	NULL
大创GO-NOGO	1	1	<?xml version="1.0"?>\n<Clock xmlns:dt="urn:schemas-microsoft-com:datatypes"><Description dt:dt="string">E-Prime Primary Realtime Clock</Description><StartTime><Timestamp dt:dt="int">0</Timestamp><DateUtc dt:dt="string">2021-12-17T01:46:23Z</DateUtc></StartTime><FrequencyChanges><FrequencyChange><Frequency dt:dt="r8">10000000</Frequency><Timestamp dt:dt="r8">583939301381</Timestamp><Current dt:dt…	60.007	1.0.0.33	1	-175485389	2.0.10.182	12-17-2021	2021-12-17 01:46:23	09:46:23	2.0.10.92	1	affpro	WordList	1	1	1	163	NULL	j	NULL	NULL	NULL	8	NULL	NULL	NULL	NULL	NULL	NULL	NULL	NULL	NULL	NULL	pra4	taskList2	抗虫害棉花+有争议的	NULL	NULL	NULL	NULL	NULL	NULL	NULL	NULL	NULL	NULL	NULL
大创GO-NOGO	1	1	<?xml version="1.0"?>\n<Clock xmlns:dt="urn:schemas-microsoft-com:datatypes"><Description dt:dt="string">E-Prime Primary Realtime Clock</Description><StartTime><Timestamp dt:dt="int">0</Timestamp><DateUtc dt:dt="string">2021-12-17T01:46:23Z</DateUtc></StartTime><FrequencyChanges><FrequencyChange><Frequency dt:dt="r8">10000000</Frequency><Timestamp dt:dt="r8">583939301381</Timestamp><Current dt:dt…	60.007	1.0.0.33	1	-175485389	2.0.10.182	12-17-2021	2021-12-17 01:46:23	09:46:23	2.0.10.92	1	affpro	WordList	1	1	1	164	NULL	j	NULL	NULL	NULL	14	NULL	NULL	NULL	NULL	NULL	NULL	NULL	NULL	NULL	NULL	pra4	taskList2	动物转基因+高风险的	NULL	NULL	NULL	NULL	NULL	NULL	NULL	NULL	NULL	NULL	NULL
大创GO-NOGO	1	1	<?xml version="1.0"?>\n<Clock xmlns:dt="urn:schemas-microsoft-com:datatypes"><Description dt:dt="string">E-Prime Primary Realtime Clock</Description><StartTime><Timestamp dt:dt="int">0</Timestamp><DateUtc dt:dt="string">2021-12-17T01:46:23Z</DateUtc></StartTime><FrequencyChanges><FrequencyChange><Frequency dt:dt="r8">10000000</Frequency><Timestamp dt:dt="r8">583939301381</Timestamp><Current dt:dt…	60.007	1.0.0.33	1	-175485389	2.0.10.182	12-17-2021	2021-12-17 01:46:23	09:46:23	2.0.10.92	1	affpro	WordList	1	1	1	165	NULL	j	NULL	NULL	NULL	15	NULL	NULL	NULL	NULL	NULL	NULL	NULL	NULL	NULL	NULL	pra4	taskList2	动物转基因+非天然的	NULL	NULL	NULL	NULL	NULL	NULL	NULL	NULL	NULL	NULL	NULL
大创GO-NOGO	1	1	<?xml version="1.0"?>\n<Clock xmlns:dt="urn:schemas-microsoft-com:datatypes"><Description dt:dt="string">E-Prime Primary Realtime Clock</Description><StartTime><Timestamp dt:dt="int">0</Timestamp><DateUtc dt:dt="string">2021-12-17T01:46:23Z</DateUtc></StartTime><FrequencyChanges><FrequencyChange><Frequency dt:dt="r8">10000000</Frequency><Timestamp dt:dt="r8">583939301381</Timestamp><Current dt:dt…	60.007	1.0.0.33	1	-175485389	2.0.10.182	12-17-2021	2021-12-17 01:46:23	09:46:23	2.0.10.92	1	affpro	WordList	1	1	1	166	NULL	j	NULL	NULL	NULL	12	NULL	NULL	NULL	NULL	NULL	NULL	NULL	NULL	NULL	NULL	pra4	taskList2	转基因大豆+有争议的	NULL	NULL	NULL	NULL	NULL	NULL	NULL	NULL	NULL	NULL	NULL
大创GO-NOGO	1	1	<?xml version="1.0"?>\n<Clock xmlns:dt="urn:schemas-microsoft-com:datatypes"><Description dt:dt="string">E-Prime Primary Realtime Clock</Description><StartTime><Timestamp dt:dt="int">0</Timestamp><DateUtc dt:dt="string">2021-12-17T01:46:23Z</DateUtc></StartTime><FrequencyChanges><FrequencyChange><Frequency dt:dt="r8">10000000</Frequency><Timestamp dt:dt="r8">583939301381</Timestamp><Current dt:dt…	60.007	1.0.0.33	1	-175485389	2.0.10.182	12-17-2021	2021-12-17 01:46:23	09:46:23	2.0.10.92	1	affpro	WordList	1	1	1	167	NULL	j	NULL	NULL	NULL	8	NULL	NULL	NULL	NULL	NULL	NULL	NULL	NULL	NULL	NULL	pra4	taskList2	抗虫害棉花+有争议的	NULL	NULL	NULL	NULL	NULL	NULL	NULL	NULL	NULL	NULL	NULL
大创GO-NOGO	1	1	<?xml version="1.0"?>\n<Clock xmlns:dt="urn:schemas-microsoft-com:datatypes"><Description dt:dt="string">E-Prime Primary Realtime Clock</Description><StartTime><Timestamp dt:dt="int">0</Timestamp><DateUtc dt:dt="string">2021-12-17T01:46:23Z</DateUtc></StartTime><FrequencyChanges><FrequencyChange><Frequency dt:dt="r8">10000000</Frequency><Timestamp dt:dt="r8">583939301381</Timestamp><Current dt:dt…	60.007	1.0.0.33	1	-175485389	2.0.10.182	12-17-2021	2021-12-17 01:46:23	09:46:23	2.0.10.92	1	affpro	WordList	1	1	1	168	NULL	j	NULL	NULL	NULL	6	NULL	NULL	NULL	NULL	NULL	NULL	NULL	NULL	NULL	NULL	pra4	taskList2	抗虫害棉花+高风险的	NULL	NULL	NULL	NULL	NULL	NULL	NULL	NULL	NULL	NULL	NULL
大创GO-NOGO	1	1	<?xml version="1.0"?>\n<Clock xmlns:dt="urn:schemas-microsoft-com:datatypes"><Description dt:dt="string">E-Prime Primary Realtime Clock</Description><StartTime><Timestamp dt:dt="int">0</Timestamp><DateUtc dt:dt="string">2021-12-17T01:46:23Z</DateUtc></StartTime><FrequencyChanges><FrequencyChange><Frequency dt:dt="r8">10000000</Frequency><Timestamp dt:dt="r8">583939301381</Timestamp><Current dt:dt…	60.007	1.0.0.33	1	-175485389	2.0.10.182	12-17-2021	2021-12-17 01:46:23	09:46:23	2.0.10.92	1	affpro	WordList	1	1	1	169	NULL	j	NULL	NULL	NULL	16	NULL	NULL	NULL	NULL	NULL	NULL	NULL	NULL	NULL	NULL	pra4	taskList2	动物转基因+有争议的	NULL	NULL	NULL	NULL	NULL	NULL	NULL	NULL	NULL	NULL	NULL
大创GO-NOGO	1	1	<?xml version="1.0"?>\n<Clock xmlns:dt="urn:schemas-microsoft-com:datatypes"><Description dt:dt="string">E-Prime Primary Realtime Clock</Description><StartTime><Timestamp dt:dt="int">0</Timestamp><DateUtc dt:dt="string">2021-12-17T01:46:23Z</DateUtc></StartTime><FrequencyChanges><FrequencyChange><Frequency dt:dt="r8">10000000</Frequency><Timestamp dt:dt="r8">583939301381</Timestamp><Current dt:dt…	60.007	1.0.0.33	1	-175485389	2.0.10.182	12-17-2021	2021-12-17 01:46:23	09:46:23	2.0.10.92	1	affpro	WordList	1	1	1	170	NULL	j	NULL	NULL	NULL	5	NULL	NULL	NULL	NULL	NULL	NULL	NULL	NULL	NULL	NULL	pra4	taskList2	抗虫害棉花+不成熟的	NULL	NULL	NULL	NULL	NULL	NULL	NULL	NULL	NULL	NULL	NULL
大创GO-NOGO	1	1	<?xml version="1.0"?>\n<Clock xmlns:dt="urn:schemas-microsoft-com:datatypes"><Description dt:dt="string">E-Prime Primary Realtime Clock</Description><StartTime><Timestamp dt:dt="int">0</Timestamp><DateUtc dt:dt="string">2021-12-17T01:46:23Z</DateUtc></StartTime><FrequencyChanges><FrequencyChange><Frequency dt:dt="r8">10000000</Frequency><Timestamp dt:dt="r8">583939301381</Timestamp><Current dt:dt…	60.007	1.0.0.33	1	-175485389	2.0.10.182	12-17-2021	2021-12-17 01:46:23	09:46:23	2.0.10.92	1	affpro	WordList	1	1	1	171	NULL	j	NULL	NULL	NULL	3	NULL	NULL	NULL	NULL	NULL	NULL	NULL	NULL	NULL	NULL	pra4	taskList2	转基因食物+非天然的	NULL	NULL	NULL	NULL	NULL	NULL	NULL	NULL	NULL	NULL	NULL
大创GO-NOGO	1	1	<?xml version="1.0"?>\n<Clock xmlns:dt="urn:schemas-microsoft-com:datatypes"><Description dt:dt="string">E-Prime Primary Realtime Clock</Description><StartTime><Timestamp dt:dt="int">0</Timestamp><DateUtc dt:dt="string">2021-12-17T01:46:23Z</DateUtc></StartTime><FrequencyChanges><FrequencyChange><Frequency dt:dt="r8">10000000</Frequency><Timestamp dt:dt="r8">583939301381</Timestamp><Current dt:dt…	60.007	1.0.0.33	1	-175485389	2.0.10.182	12-17-2021	2021-12-17 01:46:23	09:46:23	2.0.10.92	1	affpro	WordList	1	1	1	172	NULL		NULL	NULL	NULL	NULL	NULL	NULL	NULL	4	NULL	NULL	NULL	NULL	NULL	NULL	pra4	taskList2	转基因食物+创新的	NULL	NULL	NULL	NULL	NULL	NULL	NULL	NULL	NULL	NULL	NULL
大创GO-NOGO	1	1	<?xml version="1.0"?>\n<Clock xmlns:dt="urn:schemas-microsoft-com:datatypes"><Description dt:dt="string">E-Prime Primary Realtime Clock</Description><StartTime><Timestamp dt:dt="int">0</Timestamp><DateUtc dt:dt="string">2021-12-17T01:46:23Z</DateUtc></StartTime><FrequencyChanges><FrequencyChange><Frequency dt:dt="r8">10000000</Frequency><Timestamp dt:dt="r8">583939301381</Timestamp><Current dt:dt…	60.007	1.0.0.33	1	-175485389	2.0.10.182	12-17-2021	2021-12-17 01:46:23	09:46:23	2.0.10.92	1	affpro	WordList	1	1	1	173	NULL	j	NULL	NULL	NULL	1	NULL	NULL	NULL	NULL	NULL	NULL	NULL	NULL	NULL	NULL	pra4	taskList2	转基因食物+不成熟的	NULL	NULL	NULL	NULL	NULL	NULL	NULL	NULL	NULL	NULL	NULL
大创GO-NOGO	1	1	<?xml version="1.0"?>\n<Clock xmlns:dt="urn:schemas-microsoft-com:datatypes"><Description dt:dt="string">E-Prime Primary Realtime Clock</Description><StartTime><Timestamp dt:dt="int">0</Timestamp><DateUtc dt:dt="string">2021-12-17T01:46:23Z</DateUtc></StartTime><FrequencyChanges><FrequencyChange><Frequency dt:dt="r8">10000000</Frequency><Timestamp dt:dt="r8">583939301381</Timestamp><Current dt:dt…	60.007	1.0.0.33	1	-175485389	2.0.10.182	12-17-2021	2021-12-17 01:46:23	09:46:23	2.0.10.92	1	affpro	WordList	1	1	1	174	NULL	j	NULL	NULL	NULL	10	NULL	NULL	NULL	NULL	NULL	NULL	NULL	NULL	NULL	NULL	pra4	taskList2	转基因大豆+高风险的	NULL	NULL	NULL	NULL	NULL	NULL	NULL	NULL	NULL	NULL	NULL
大创GO-NOGO	1	1	<?xml version="1.0"?>\n<Clock xmlns:dt="urn:schemas-microsoft-com:datatypes"><Description dt:dt="string">E-Prime Primary Realtime Clock</Description><StartTime><Timestamp dt:dt="int">0</Timestamp><DateUtc dt:dt="string">2021-12-17T01:46:23Z</DateUtc></StartTime><FrequencyChanges><FrequencyChange><Frequency dt:dt="r8">10000000</Frequency><Timestamp dt:dt="r8">583939301381</Timestamp><Current dt:dt…	60.007	1.0.0.33	1	-175485389	2.0.10.182	12-17-2021	2021-12-17 01:46:23	09:46:23	2.0.10.92	1	affpro	WordList	1	1	1	175	NULL		NULL	NULL	NULL	NULL	NULL	NULL	NULL	13	NULL	NULL	NULL	NULL	NULL	NULL	pra4	taskList2	动物转基因+科学的	NULL	NULL	NULL	NULL	NULL	NULL	NULL	NULL	NULL	NULL	NULL
大创GO-NOGO	1	1	<?xml version="1.0"?>\n<Clock xmlns:dt="urn:schemas-microsoft-com:datatypes"><Description dt:dt="string">E-Prime Primary Realtime Clock</Description><StartTime><Timestamp dt:dt="int">0</Timestamp><DateUtc dt:dt="string">2021-12-17T01:46:23Z</DateUtc></StartTime><FrequencyChanges><FrequencyChange><Frequency dt:dt="r8">10000000</Frequency><Timestamp dt:dt="r8">583939301381</Timestamp><Current dt:dt…	60.007	1.0.0.33	1	-175485389	2.0.10.182	12-17-2021	2021-12-17 01:46:23	09:46:23	2.0.10.92	1	affpro	WordList	1	1	1	176	NULL	j	NULL	NULL	NULL	11	NULL	NULL	NULL	NULL	NULL	NULL	NULL	NULL	NULL	NULL	pra4	taskList2	转基因大豆+非天然的	NULL	NULL	NULL	NULL	NULL	NULL	NULL	NULL	NULL	NULL	NULL
大创GO-NOGO	1	1	<?xml version="1.0"?>\n<Clock xmlns:dt="urn:schemas-microsoft-com:datatypes"><Description dt:dt="string">E-Prime Primary Realtime Clock</Description><StartTime><Timestamp dt:dt="int">0</Timestamp><DateUtc dt:dt="string">2021-12-17T01:46:23Z</DateUtc></StartTime><FrequencyChanges><FrequencyChange><Frequency dt:dt="r8">10000000</Frequency><Timestamp dt:dt="r8">583939301381</Timestamp><Current dt:dt…	60.007	1.0.0.33	1	-175485389	2.0.10.182	12-17-2021	2021-12-17 01:46:23	09:46:23	2.0.10.92	1	affpro	WordList	1	1	1	177	NULL		NULL	NULL	NULL	NULL	NULL	NULL	NULL	10	NULL	NULL	NULL	NULL	NULL	NULL	pra4	taskList2	转基因大豆+高产的	NULL	NULL	NULL	NULL	NULL	NULL	NULL	NULL	NULL	NULL	NULL
大创GO-NOGO	1	1	<?xml version="1.0"?>\n<Clock xmlns:dt="urn:schemas-microsoft-com:datatypes"><Description dt:dt="string">E-Prime Primary Realtime Clock</Description><StartTime><Timestamp dt:dt="int">0</Timestamp><DateUtc dt:dt="string">2021-12-17T01:46:23Z</DateUtc></StartTime><FrequencyChanges><FrequencyChange><Frequency dt:dt="r8">10000000</Frequency><Timestamp dt:dt="r8">583939301381</Timestamp><Current dt:dt…	60.007	1.0.0.33	1	-175485389	2.0.10.182	12-17-2021	2021-12-17 01:46:23	09:46:23	2.0.10.92	1	affpro	WordList	1	1	1	178	NULL	j	NULL	NULL	NULL	9	NULL	NULL	NULL	NULL	NULL	NULL	NULL	NULL	NULL	NULL	pra4	taskList2	转基因大豆+不成熟的	NULL	NULL	NULL	NULL	NULL	NULL	NULL	NULL	NULL	NULL	NULL
大创GO-NOGO	1	1	<?xml version="1.0"?>\n<Clock xmlns:dt="urn:schemas-microsoft-com:datatypes"><Description dt:dt="string">E-Prime Primary Realtime Clock</Description><StartTime><Timestamp dt:dt="int">0</Timestamp><DateUtc dt:dt="string">2021-12-17T01:46:23Z</DateUtc></StartTime><FrequencyChanges><FrequencyChange><Frequency dt:dt="r8">10000000</Frequency><Timestamp dt:dt="r8">583939301381</Timestamp><Current dt:dt…	60.007	1.0.0.33	1	-175485389	2.0.10.182	12-17-2021	2021-12-17 01:46:23	09:46:23	2.0.10.92	1	affpro	WordList	1	1	1	179	NULL	j	NULL	NULL	NULL	4	NULL	NULL	NULL	NULL	NULL	NULL	NULL	NULL	NULL	NULL	pra4	taskList2	转基因食物+有争议的	NULL	NULL	NULL	NULL	NULL	NULL	NULL	NULL	NULL	NULL	NULL
大创GO-NOGO	1	1	<?xml version="1.0"?>\n<Clock xmlns:dt="urn:schemas-microsoft-com:datatypes"><Description dt:dt="string">E-Prime Primary Realtime Clock</Description><StartTime><Timestamp dt:dt="int">0</Timestamp><DateUtc dt:dt="string">2021-12-17T01:46:23Z</DateUtc></StartTime><FrequencyChanges><FrequencyChange><Frequency dt:dt="r8">10000000</Frequency><Timestamp dt:dt="r8">583939301381</Timestamp><Current dt:dt…	60.007	1.0.0.33	1	-175485389	2.0.10.182	12-17-2021	2021-12-17 01:46:23	09:46:23	2.0.10.92	1	affpro	WordList	1	1	1	180	NULL		NULL	NULL	NULL	NULL	NULL	NULL	NULL	7	NULL	NULL	NULL	NULL	NULL	NULL	pra4	taskList2	抗虫害棉花+高科技的	NULL	NULL	NULL	NULL	NULL	NULL	NULL	NULL	NULL	NULL	NULL
大创GO-NOGO	1	1	<?xml version="1.0"?>\n<Clock xmlns:dt="urn:schemas-microsoft-com:datatypes"><Description dt:dt="string">E-Prime Primary Realtime Clock</Description><StartTime><Timestamp dt:dt="int">0</Timestamp><DateUtc dt:dt="string">2021-12-17T01:46:23Z</DateUtc></StartTime><FrequencyChanges><FrequencyChange><Frequency dt:dt="r8">10000000</Frequency><Timestamp dt:dt="r8">583939301381</Timestamp><Current dt:dt…	60.007	1.0.0.33	1	-175485389	2.0.10.182	12-17-2021	2021-12-17 01:46:23	09:46:23	2.0.10.92	1	affpro	WordList	1	1	1	181	NULL		NULL	NULL	NULL	NULL	NULL	NULL	NULL	12	NULL	NULL	NULL	NULL	NULL	NULL	pra4	taskList2	转基因大豆+创新的	NULL	NULL	NULL	NULL	NULL	NULL	NULL	NULL	NULL	NULL	NULL
大创GO-NOGO	1	1	<?xml version="1.0"?>\n<Clock xmlns:dt="urn:schemas-microsoft-com:datatypes"><Description dt:dt="string">E-Prime Primary Realtime Clock</Description><StartTime><Timestamp dt:dt="int">0</Timestamp><DateUtc dt:dt="string">2021-12-17T01:46:23Z</DateUtc></StartTime><FrequencyChanges><FrequencyChange><Frequency dt:dt="r8">10000000</Frequency><Timestamp dt:dt="r8">583939301381</Timestamp><Current dt:dt…	60.007	1.0.0.33	1	-175485389	2.0.10.182	12-17-2021	2021-12-17 01:46:23	09:46:23	2.0.10.92	1	affpro	WordList	1	1	1	182	NULL	j	NULL	NULL	NULL	2	NULL	NULL	NULL	NULL	NULL	NULL	NULL	NULL	NULL	NULL	pra4	taskList2	转基因食物+高风险的	NULL	NULL	NULL	NULL	NULL	NULL	NULL	NULL	NULL	NULL	NULL
大创GO-NOGO	1	1	<?xml version="1.0"?>\n<Clock xmlns:dt="urn:schemas-microsoft-com:datatypes"><Description dt:dt="string">E-Prime Primary Realtime Clock</Description><StartTime><Timestamp dt:dt="int">0</Timestamp><DateUtc dt:dt="string">2021-12-17T01:46:23Z</DateUtc></StartTime><FrequencyChanges><FrequencyChange><Frequency dt:dt="r8">10000000</Frequency><Timestamp dt:dt="r8">583939301381</Timestamp><Current dt:dt…	60.007	1.0.0.33	1	-175485389	2.0.10.182	12-17-2021	2021-12-17 01:46:23	09:46:23	2.0.10.92	1	affpro	WordList	1	1	1	183	NULL		NULL	NULL	NULL	NULL	NULL	NULL	NULL	4	NULL	NULL	NULL	NULL	NULL	NULL	pra4	taskList2	转基因食物+创新的	NULL	NULL	NULL	NULL	NULL	NULL	NULL	NULL	NULL	NULL	NULL
大创GO-NOGO	1	1	<?xml version="1.0"?>\n<Clock xmlns:dt="urn:schemas-microsoft-com:datatypes"><Description dt:dt="string">E-Prime Primary Realtime Clock</Description><StartTime><Timestamp dt:dt="int">0</Timestamp><DateUtc dt:dt="string">2021-12-17T01:46:23Z</DateUtc></StartTime><FrequencyChanges><FrequencyChange><Frequency dt:dt="r8">10000000</Frequency><Timestamp dt:dt="r8">583939301381</Timestamp><Current dt:dt…	60.007	1.0.0.33	1	-175485389	2.0.10.182	12-17-2021	2021-12-17 01:46:23	09:46:23	2.0.10.92	1	affpro	WordList	1	1	1	184	NULL	j	NULL	NULL	NULL	7	NULL	NULL	NULL	NULL	NULL	NULL	NULL	NULL	NULL	NULL	pra4	taskList2	抗虫害棉花+非天然的	NULL	NULL	NULL	NULL	NULL	NULL	NULL	NULL	NULL	NULL	NULL
大创GO-NOGO	1	1	<?xml version="1.0"?>\n<Clock xmlns:dt="urn:schemas-microsoft-com:datatypes"><Description dt:dt="string">E-Prime Primary Realtime Clock</Description><StartTime><Timestamp dt:dt="int">0</Timestamp><DateUtc dt:dt="string">2021-12-17T01:46:23Z</DateUtc></StartTime><FrequencyChanges><FrequencyChange><Frequency dt:dt="r8">10000000</Frequency><Timestamp dt:dt="r8">583939301381</Timestamp><Current dt:dt…	60.007	1.0.0.33	1	-175485389	2.0.10.182	12-17-2021	2021-12-17 01:46:23	09:46:23	2.0.10.92	1	affpro	WordList	1	1	1	185	NULL	j	NULL	NULL	NULL	13	NULL	NULL	NULL	NULL	NULL	NULL	NULL	NULL	NULL	NULL	pra4	taskList2	动物转基因+不成熟的	NULL	NULL	NULL	NULL	NULL	NULL	NULL	NULL	NULL	NULL	NULL
大创GO-NOGO	1	1	<?xml version="1.0"?>\n<Clock xmlns:dt="urn:schemas-microsoft-com:datatypes"><Description dt:dt="string">E-Prime Primary Realtime Clock</Description><StartTime><Timestamp dt:dt="int">0</Timestamp><DateUtc dt:dt="string">2021-12-17T01:46:23Z</DateUtc></StartTime><FrequencyChanges><FrequencyChange><Frequency dt:dt="r8">10000000</Frequency><Timestamp dt:dt="r8">583939301381</Timestamp><Current dt:dt…	60.007	1.0.0.33	1	-175485389	2.0.10.182	12-17-2021	2021-12-17 01:46:23	09:46:23	2.0.10.92	1	affpro	WordList	1	1	1	186	NULL		NULL	NULL	NULL	NULL	NULL	NULL	NULL	11	NULL	NULL	NULL	NULL	NULL	NULL	pra4	taskList2	转基因大豆+高科技的	NULL	NULL	NULL	NULL	NULL	NULL	NULL	NULL	NULL	NULL	NULL
大创GO-NOGO	1	1	<?xml version="1.0"?>\n<Clock xmlns:dt="urn:schemas-microsoft-com:datatypes"><Description dt:dt="string">E-Prime Primary Realtime Clock</Description><StartTime><Timestamp dt:dt="int">0</Timestamp><DateUtc dt:dt="string">2021-12-17T01:46:23Z</DateUtc></StartTime><FrequencyChanges><FrequencyChange><Frequency dt:dt="r8">10000000</Frequency><Timestamp dt:dt="r8">583939301381</Timestamp><Current dt:dt…	60.007	1.0.0.33	1	-175485389	2.0.10.182	12-17-2021	2021-12-17 01:46:23	09:46:23	2.0.10.92	1	affpro	WordList	1	1	1	187	NULL		NULL	NULL	NULL	NULL	NULL	NULL	NULL	12	NULL	NULL	NULL	NULL	NULL	NULL	pra4	taskList2	转基因大豆+创新的	NULL	NULL	NULL	NULL	NULL	NULL	NULL	NULL	NULL	NULL	NULL
大创GO-NOGO	1	1	<?xml version="1.0"?>\n<Clock xmlns:dt="urn:schemas-microsoft-com:datatypes"><Description dt:dt="string">E-Prime Primary Realtime Clock</Description><StartTime><Timestamp dt:dt="int">0</Timestamp><DateUtc dt:dt="string">2021-12-17T01:46:23Z</DateUtc></StartTime><FrequencyChanges><FrequencyChange><Frequency dt:dt="r8">10000000</Frequency><Timestamp dt:dt="r8">583939301381</Timestamp><Current dt:dt…	60.007	1.0.0.33	1	-175485389	2.0.10.182	12-17-2021	2021-12-17 01:46:23	09:46:23	2.0.10.92	1	affpro	WordList	1	1	1	188	NULL	j	NULL	NULL	NULL	5	NULL	NULL	NULL	NULL	NULL	NULL	NULL	NULL	NULL	NULL	pra4	taskList2	抗虫害棉花+不成熟的	NULL	NULL	NULL	NULL	NULL	NULL	NULL	NULL	NULL	NULL	NULL
大创GO-NOGO	1	1	<?xml version="1.0"?>\n<Clock xmlns:dt="urn:schemas-microsoft-com:datatypes"><Description dt:dt="string">E-Prime Primary Realtime Clock</Description><StartTime><Timestamp dt:dt="int">0</Timestamp><DateUtc dt:dt="string">2021-12-17T01:46:23Z</DateUtc></StartTime><FrequencyChanges><FrequencyChange><Frequency dt:dt="r8">10000000</Frequency><Timestamp dt:dt="r8">583939301381</Timestamp><Current dt:dt…	60.007	1.0.0.33	1	-175485389	2.0.10.182	12-17-2021	2021-12-17 01:46:23	09:46:23	2.0.10.92	1	affpro	WordList	1	1	1	189	NULL	j	NULL	NULL	NULL	9	NULL	NULL	NULL	NULL	NULL	NULL	NULL	NULL	NULL	NULL	pra4	taskList2	转基因大豆+不成熟的	NULL	NULL	NULL	NULL	NULL	NULL	NULL	NULL	NULL	NULL	NULL
大创GO-NOGO	1	1	<?xml version="1.0"?>\n<Clock xmlns:dt="urn:schemas-microsoft-com:datatypes"><Description dt:dt="string">E-Prime Primary Realtime Clock</Description><StartTime><Timestamp dt:dt="int">0</Timestamp><DateUtc dt:dt="string">2021-12-17T01:46:23Z</DateUtc></StartTime><FrequencyChanges><FrequencyChange><Frequency dt:dt="r8">10000000</Frequency><Timestamp dt:dt="r8">583939301381</Timestamp><Current dt:dt…	60.007	1.0.0.33	1	-175485389	2.0.10.182	12-17-2021	2021-12-17 01:46:23	09:46:23	2.0.10.92	1	affpro	WordList	1	1	1	190	NULL		NULL	NULL	NULL	NULL	NULL	NULL	NULL	2	NULL	NULL	NULL	NULL	NULL	NULL	pra4	taskList2	转基因食物+高产的	NULL	NULL	NULL	NULL	NULL	NULL	NULL	NULL	NULL	NULL	NULL
大创GO-NOGO	1	1	<?xml version="1.0"?>\n<Clock xmlns:dt="urn:schemas-microsoft-com:datatypes"><Description dt:dt="string">E-Prime Primary Realtime Clock</Description><StartTime><Timestamp dt:dt="int">0</Timestamp><DateUtc dt:dt="string">2021-12-17T01:46:23Z</DateUtc></StartTime><FrequencyChanges><FrequencyChange><Frequency dt:dt="r8">10000000</Frequency><Timestamp dt:dt="r8">583939301381</Timestamp><Current dt:dt…	60.007	1.0.0.33	1	-175485389	2.0.10.182	12-17-2021	2021-12-17 01:46:23	09:46:23	2.0.10.92	1	affpro	WordList	1	1	1	191	NULL		NULL	NULL	NULL	NULL	NULL	NULL	NULL	8	NULL	NULL	NULL	NULL	NULL	NULL	pra4	taskList2	抗虫害棉花+创新的	NULL	NULL	NULL	NULL	NULL	NULL	NULL	NULL	NULL	NULL	NULL
大创GO-NOGO	1	2	<?xml version="1.0"?>\n<Clock xmlns:dt="urn:schemas-microsoft-com:datatypes"><Description dt:dt="string">E-Prime Primary Realtime Clock</Description><StartTime><Timestamp dt:dt="int">0</Timestamp><DateUtc dt:dt="string">2021-12-20T08:40:27Z</DateUtc></StartTime><FrequencyChanges><FrequencyChange><Frequency dt:dt="r8">10000000</Frequency><Timestamp dt:dt="r8">305379635201</Timestamp><Current dt:dt…	60.005	1.0.0.33	1	438939341	2.0.10.182	12-20-2021	2021-12-20 08:40:27	16:40:27	2.0.10.92	1	affpro	WordList	1	1	1	1	f	NULL	NULL	NULL	NULL	NULL	5	NULL	NULL	NULL	1	1	1	NULL	NULL	NULL	pra1	practiceList1	抗虫害棉花+科学的	0	f	0	0	65326	1033		0	0	NULL	NULL
大创GO-NOGO	1	2	<?xml version="1.0"?>\n<Clock xmlns:dt="urn:schemas-microsoft-com:datatypes"><Description dt:dt="string">E-Prime Primary Realtime Clock</Description><StartTime><Timestamp dt:dt="int">0</Timestamp><DateUtc dt:dt="string">2021-12-20T08:40:27Z</DateUtc></StartTime><FrequencyChanges><FrequencyChange><Frequency dt:dt="r8">10000000</Frequency><Timestamp dt:dt="r8">305379635201</Timestamp><Current dt:dt…	60.005	1.0.0.33	1	438939341	2.0.10.182	12-20-2021	2021-12-20 08:40:27	16:40:27	2.0.10.92	1	affpro	WordList	1	1	1	2	f	NULL	NULL	NULL	NULL	NULL	1	NULL	NULL	NULL	1	1	2	NULL	NULL	NULL	pra1	practiceList1	转基因食物+科学的	0	f	0	0	67076	1016		0	0	NULL	NULL
大创GO-NOGO	1	2	<?xml version="1.0"?>\n<Clock xmlns:dt="urn:schemas-microsoft-com:datatypes"><Description dt:dt="string">E-Prime Primary Realtime Clock</Description><StartTime><Timestamp dt:dt="int">0</Timestamp><DateUtc dt:dt="string">2021-12-20T08:40:27Z</DateUtc></StartTime><FrequencyChanges><FrequencyChange><Frequency dt:dt="r8">10000000</Frequency><Timestamp dt:dt="r8">305379635201</Timestamp><Current dt:dt…	60.005	1.0.0.33	1	438939341	2.0.10.182	12-20-2021	2021-12-20 08:40:27	16:40:27	2.0.10.92	1	affpro	WordList	1	1	1	3		NULL	2	NULL	NULL	NULL	NULL	NULL	NULL	NULL	2	2	3	NULL	NULL	NULL	pra1	practiceList1	转基因食物+高风险的	0		0	0	68809	0	f	571	69380	NULL	NULL
大创GO-NOGO	1	2	<?xml version="1.0"?>\n<Clock xmlns:dt="urn:schemas-microsoft-com:datatypes"><Description dt:dt="string">E-Prime Primary Realtime Clock</Description><StartTime><Timestamp dt:dt="int">0</Timestamp><DateUtc dt:dt="string">2021-12-20T08:40:27Z</DateUtc></StartTime><FrequencyChanges><FrequencyChange><Frequency dt:dt="r8">10000000</Frequency><Timestamp dt:dt="r8">305379635201</Timestamp><Current dt:dt…	60.005	1.0.0.33	1	438939341	2.0.10.182	12-20-2021	2021-12-20 08:40:27	16:40:27	2.0.10.92	1	affpro	WordList	1	1	1	4		NULL	3	NULL	NULL	NULL	NULL	NULL	NULL	NULL	2	2	4	NULL	NULL	NULL	pra1	practiceList1	转基因食物+非天然的	1		0	0	70126	1016		0	0	NULL	NULL
大创GO-NOGO	1	2	<?xml version="1.0"?>\n<Clock xmlns:dt="urn:schemas-microsoft-com:datatypes"><Description dt:dt="string">E-Prime Primary Realtime Clock</Description><StartTime><Timestamp dt:dt="int">0</Timestamp><DateUtc dt:dt="string">2021-12-20T08:40:27Z</DateUtc></StartTime><FrequencyChanges><FrequencyChange><Frequency dt:dt="r8">10000000</Frequency><Timestamp dt:dt="r8">305379635201</Timestamp><Current dt:dt…	60.005	1.0.0.33	1	438939341	2.0.10.182	12-20-2021	2021-12-20 08:40:27	16:40:27	2.0.10.92	1	affpro	WordList	1	1	1	5		NULL	15	NULL	NULL	NULL	NULL	NULL	NULL	NULL	2	3	5	NULL	NULL	NULL	pra1	practiceList1	动物转基因+非天然的	0		0	0	71859	0	f	642	72501	NULL	NULL
大创GO-NOGO	1	2	<?xml version="1.0"?>\n<Clock xmlns:dt="urn:schemas-microsoft-com:datatypes"><Description dt:dt="string">E-Prime Primary Realtime Clock</Description><StartTime><Timestamp dt:dt="int">0</Timestamp><DateUtc dt:dt="string">2021-12-20T08:40:27Z</DateUtc></StartTime><FrequencyChanges><FrequencyChange><Frequency dt:dt="r8">10000000</Frequency><Timestamp dt:dt="r8">305379635201</Timestamp><Current dt:dt…	60.005	1.0.0.33	1	438939341	2.0.10.182	12-20-2021	2021-12-20 08:40:27	16:40:27	2.0.10.92	1	affpro	WordList	1	1	1	6	f	NULL	NULL	NULL	NULL	NULL	11	NULL	NULL	NULL	1	3	6	NULL	NULL	NULL	pra1	practiceList1	转基因大豆+高科技的	1	f	1	0	73242	0	f	681	73923	NULL	NULL
大创GO-NOGO	1	2	<?xml version="1.0"?>\n<Clock xmlns:dt="urn:schemas-microsoft-com:datatypes"><Description dt:dt="string">E-Prime Primary Realtime Clock</Description><StartTime><Timestamp dt:dt="int">0</Timestamp><DateUtc dt:dt="string">2021-12-20T08:40:27Z</DateUtc></StartTime><FrequencyChanges><FrequencyChange><Frequency dt:dt="r8">10000000</Frequency><Timestamp dt:dt="r8">305379635201</Timestamp><Current dt:dt…	60.005	1.0.0.33	1	438939341	2.0.10.182	12-20-2021	2021-12-20 08:40:27	16:40:27	2.0.10.92	1	affpro	WordList	1	1	1	7		NULL	4	NULL	NULL	NULL	NULL	NULL	NULL	NULL	2	4	7	NULL	NULL	NULL	pra1	practiceList1	转基因食物+有争议的	0		0	0	74659	0	f	626	75285	NULL	NULL
大创GO-NOGO	1	2	<?xml version="1.0"?>\n<Clock xmlns:dt="urn:schemas-microsoft-com:datatypes"><Description dt:dt="string">E-Prime Primary Realtime Clock</Description><StartTime><Timestamp dt:dt="int">0</Timestamp><DateUtc dt:dt="string">2021-12-20T08:40:27Z</DateUtc></StartTime><FrequencyChanges><FrequencyChange><Frequency dt:dt="r8">10000000</Frequency><Timestamp dt:dt="r8">305379635201</Timestamp><Current dt:dt…	60.005	1.0.0.33	1	438939341	2.0.10.182	12-20-2021	2021-12-20 08:40:27	16:40:27	2.0.10.92	1	affpro	WordList	1	1	1	8	f	NULL	NULL	NULL	NULL	NULL	2	NULL	NULL	NULL	1	4	8	NULL	NULL	NULL	pra1	practiceList1	转基因食物+高产的	0	f	0	0	76026	1016		0	0	NULL	NULL
大创GO-NOGO	1	2	<?xml version="1.0"?>\n<Clock xmlns:dt="urn:schemas-microsoft-com:datatypes"><Description dt:dt="string">E-Prime Primary Realtime Clock</Description><StartTime><Timestamp dt:dt="int">0</Timestamp><DateUtc dt:dt="string">2021-12-20T08:40:27Z</DateUtc></StartTime><FrequencyChanges><FrequencyChange><Frequency dt:dt="r8">10000000</Frequency><Timestamp dt:dt="r8">305379635201</Timestamp><Current dt:dt…	60.005	1.0.0.33	1	438939341	2.0.10.182	12-20-2021	2021-12-20 08:40:27	16:40:27	2.0.10.92	1	affpro	WordList	1	1	1	9		NULL	7	NULL	NULL	NULL	NULL	NULL	NULL	NULL	2	5	9	NULL	NULL	NULL	pra1	practiceList1	抗虫害棉花+非天然的	1		0	0	77759	1017		0	0	NULL	NULL
大创GO-NOGO	1	2	<?xml version="1.0"?>\n<Clock xmlns:dt="urn:schemas-microsoft-com:datatypes"><Description dt:dt="string">E-Prime Primary Realtime Clock</Description><StartTime><Timestamp dt:dt="int">0</Timestamp><DateUtc dt:dt="string">2021-12-20T08:40:27Z</DateUtc></StartTime><FrequencyChanges><FrequencyChange><Frequency dt:dt="r8">10000000</Frequency><Timestamp dt:dt="r8">305379635201</Timestamp><Current dt:dt…	60.005	1.0.0.33	1	438939341	2.0.10.182	12-20-2021	2021-12-20 08:40:27	16:40:27	2.0.10.92	1	affpro	WordList	1	1	1	10	f	NULL	NULL	NULL	NULL	NULL	15	NULL	NULL	NULL	1	5	10	NULL	NULL	NULL	pra1	practiceList1	动物转基因+高科技的	1	f	0	0	79492	0	f	540	80032	NULL	NULL
大创GO-NOGO	1	2	<?xml version="1.0"?>\n<Clock xmlns:dt="urn:schemas-microsoft-com:datatypes"><Description dt:dt="string">E-Prime Primary Realtime Clock</Description><StartTime><Timestamp dt:dt="int">0</Timestamp><DateUtc dt:dt="string">2021-12-20T08:40:27Z</DateUtc></StartTime><FrequencyChanges><FrequencyChange><Frequency dt:dt="r8">10000000</Frequency><Timestamp dt:dt="r8">305379635201</Timestamp><Current dt:dt…	60.005	1.0.0.33	1	438939341	2.0.10.182	12-20-2021	2021-12-20 08:40:27	16:40:27	2.0.10.92	1	affpro	WordList	1	1	1	11		NULL	16	NULL	NULL	NULL	NULL	NULL	NULL	NULL	2	6	11	NULL	NULL	NULL	pra1	practiceList1	动物转基因+有争议的	0		0	0	80759	0	f	646	81405	NULL	NULL
大创GO-NOGO	1	2	<?xml version="1.0"?>\n<Clock xmlns:dt="urn:schemas-microsoft-com:datatypes"><Description dt:dt="string">E-Prime Primary Realtime Clock</Description><StartTime><Timestamp dt:dt="int">0</Timestamp><DateUtc dt:dt="string">2021-12-20T08:40:27Z</DateUtc></StartTime><FrequencyChanges><FrequencyChange><Frequency dt:dt="r8">10000000</Frequency><Timestamp dt:dt="r8">305379635201</Timestamp><Current dt:dt…	60.005	1.0.0.33	1	438939341	2.0.10.182	12-20-2021	2021-12-20 08:40:27	16:40:27	2.0.10.92	1	affpro	WordList	1	1	1	12	f	NULL	NULL	NULL	NULL	NULL	16	NULL	NULL	NULL	1	6	12	NULL	NULL	NULL	pra1	practiceList1	动物转基因+创新的	1	f	0	0	82142	0	f	501	82643	NULL	NULL
大创GO-NOGO	1	2	<?xml version="1.0"?>\n<Clock xmlns:dt="urn:schemas-microsoft-com:datatypes"><Description dt:dt="string">E-Prime Primary Realtime Clock</Description><StartTime><Timestamp dt:dt="int">0</Timestamp><DateUtc dt:dt="string">2021-12-20T08:40:27Z</DateUtc></StartTime><FrequencyChanges><FrequencyChange><Frequency dt:dt="r8">10000000</Frequency><Timestamp dt:dt="r8">305379635201</Timestamp><Current dt:dt…	60.005	1.0.0.33	1	438939341	2.0.10.182	12-20-2021	2021-12-20 08:40:27	16:40:27	2.0.10.92	1	affpro	WordList	1	1	1	13		NULL	13	NULL	NULL	NULL	NULL	NULL	NULL	NULL	2	7	13	NULL	NULL	NULL	pra1	practiceList1	动物转基因+不成熟的	1		1	0	83375	1017		0	0	NULL	NULL
大创GO-NOGO	1	2	<?xml version="1.0"?>\n<Clock xmlns:dt="urn:schemas-microsoft-com:datatypes"><Description dt:dt="string">E-Prime Primary Realtime Clock</Description><StartTime><Timestamp dt:dt="int">0</Timestamp><DateUtc dt:dt="string">2021-12-20T08:40:27Z</DateUtc></StartTime><FrequencyChanges><FrequencyChange><Frequency dt:dt="r8">10000000</Frequency><Timestamp dt:dt="r8">305379635201</Timestamp><Current dt:dt…	60.005	1.0.0.33	1	438939341	2.0.10.182	12-20-2021	2021-12-20 08:40:27	16:40:27	2.0.10.92	1	affpro	WordList	1	1	1	14	f	NULL	NULL	NULL	NULL	NULL	3	NULL	NULL	NULL	1	7	14	NULL	NULL	NULL	pra1	practiceList1	转基因食物+高科技的	1	f	0	0	85109	0	f	406	85515	NULL	NULL
大创GO-NOGO	1	2	<?xml version="1.0"?>\n<Clock xmlns:dt="urn:schemas-microsoft-com:datatypes"><Description dt:dt="string">E-Prime Primary Realtime Clock</Description><StartTime><Timestamp dt:dt="int">0</Timestamp><DateUtc dt:dt="string">2021-12-20T08:40:27Z</DateUtc></StartTime><FrequencyChanges><FrequencyChange><Frequency dt:dt="r8">10000000</Frequency><Timestamp dt:dt="r8">305379635201</Timestamp><Current dt:dt…	60.005	1.0.0.33	1	438939341	2.0.10.182	12-20-2021	2021-12-20 08:40:27	16:40:27	2.0.10.92	1	affpro	WordList	1	1	1	15	f	NULL	NULL	NULL	NULL	NULL	13	NULL	NULL	NULL	1	8	15	NULL	NULL	NULL	pra1	practiceList1	动物转基因+科学的	1	f	0	0	86259	0	f	565	86824	NULL	NULL
大创GO-NOGO	1	2	<?xml version="1.0"?>\n<Clock xmlns:dt="urn:schemas-microsoft-com:datatypes"><Description dt:dt="string">E-Prime Primary Realtime Clock</Description><StartTime><Timestamp dt:dt="int">0</Timestamp><DateUtc dt:dt="string">2021-12-20T08:40:27Z</DateUtc></StartTime><FrequencyChanges><FrequencyChange><Frequency dt:dt="r8">10000000</Frequency><Timestamp dt:dt="r8">305379635201</Timestamp><Current dt:dt…	60.005	1.0.0.33	1	438939341	2.0.10.182	12-20-2021	2021-12-20 08:40:27	16:40:27	2.0.10.92	1	affpro	WordList	1	1	1	16		NULL	10	NULL	NULL	NULL	NULL	NULL	NULL	NULL	2	8	16	NULL	NULL	NULL	pra1	practiceList1	转基因大豆+高风险的	1		0	0	87559	1016		0	0	NULL	NULL
大创GO-NOGO	1	2	<?xml version="1.0"?>\n<Clock xmlns:dt="urn:schemas-microsoft-com:datatypes"><Description dt:dt="string">E-Prime Primary Realtime Clock</Description><StartTime><Timestamp dt:dt="int">0</Timestamp><DateUtc dt:dt="string">2021-12-20T08:40:27Z</DateUtc></StartTime><FrequencyChanges><FrequencyChange><Frequency dt:dt="r8">10000000</Frequency><Timestamp dt:dt="r8">305379635201</Timestamp><Current dt:dt…	60.005	1.0.0.33	1	438939341	2.0.10.182	12-20-2021	2021-12-20 08:40:27	16:40:27	2.0.10.92	1	affpro	WordList	1	1	1	17	f	NULL	NULL	NULL	NULL	NULL	6	NULL	NULL	NULL	1	9	17	NULL	NULL	NULL	pra1	practiceList1	抗虫害棉花+高产的	1	f	0	0	89292	0	f	385	89677	NULL	NULL
大创GO-NOGO	1	2	<?xml version="1.0"?>\n<Clock xmlns:dt="urn:schemas-microsoft-com:datatypes"><Description dt:dt="string">E-Prime Primary Realtime Clock</Description><StartTime><Timestamp dt:dt="int">0</Timestamp><DateUtc dt:dt="string">2021-12-20T08:40:27Z</DateUtc></StartTime><FrequencyChanges><FrequencyChange><Frequency dt:dt="r8">10000000</Frequency><Timestamp dt:dt="r8">305379635201</Timestamp><Current dt:dt…	60.005	1.0.0.33	1	438939341	2.0.10.182	12-20-2021	2021-12-20 08:40:27	16:40:27	2.0.10.92	1	affpro	WordList	1	1	1	18		NULL	14	NULL	NULL	NULL	NULL	NULL	NULL	NULL	2	9	18	NULL	NULL	NULL	pra1	practiceList1	动物转基因+高风险的	1		0	0	90409	1016		0	0	NULL	NULL
大创GO-NOGO	1	2	<?xml version="1.0"?>\n<Clock xmlns:dt="urn:schemas-microsoft-com:datatypes"><Description dt:dt="string">E-Prime Primary Realtime Clock</Description><StartTime><Timestamp dt:dt="int">0</Timestamp><DateUtc dt:dt="string">2021-12-20T08:40:27Z</DateUtc></StartTime><FrequencyChanges><FrequencyChange><Frequency dt:dt="r8">10000000</Frequency><Timestamp dt:dt="r8">305379635201</Timestamp><Current dt:dt…	60.005	1.0.0.33	1	438939341	2.0.10.182	12-20-2021	2021-12-20 08:40:27	16:40:27	2.0.10.92	1	affpro	WordList	1	1	1	19	f	NULL	NULL	NULL	NULL	NULL	4	NULL	NULL	NULL	1	10	19	NULL	NULL	NULL	pra1	practiceList1	转基因食物+创新的	1	f	0	0	92142	0	f	372	92514	NULL	NULL
大创GO-NOGO	1	2	<?xml version="1.0"?>\n<Clock xmlns:dt="urn:schemas-microsoft-com:datatypes"><Description dt:dt="string">E-Prime Primary Realtime Clock</Description><StartTime><Timestamp dt:dt="int">0</Timestamp><DateUtc dt:dt="string">2021-12-20T08:40:27Z</DateUtc></StartTime><FrequencyChanges><FrequencyChange><Frequency dt:dt="r8">10000000</Frequency><Timestamp dt:dt="r8">305379635201</Timestamp><Current dt:dt…	60.005	1.0.0.33	1	438939341	2.0.10.182	12-20-2021	2021-12-20 08:40:27	16:40:27	2.0.10.92	1	affpro	WordList	1	1	1	20		NULL	11	NULL	NULL	NULL	NULL	NULL	NULL	NULL	2	10	20	NULL	NULL	NULL	pra1	practiceList1	转基因大豆+非天然的	1		0	0	93242	1017		0	0	NULL	NULL
大创GO-NOGO	1	2	<?xml version="1.0"?>\n<Clock xmlns:dt="urn:schemas-microsoft-com:datatypes"><Description dt:dt="string">E-Prime Primary Realtime Clock</Description><StartTime><Timestamp dt:dt="int">0</Timestamp><DateUtc dt:dt="string">2021-12-20T08:40:27Z</DateUtc></StartTime><FrequencyChanges><FrequencyChange><Frequency dt:dt="r8">10000000</Frequency><Timestamp dt:dt="r8">305379635201</Timestamp><Current dt:dt…	60.005	1.0.0.33	1	438939341	2.0.10.182	12-20-2021	2021-12-20 08:40:27	16:40:27	2.0.10.92	1	affpro	WordList	1	1	1	21		NULL	12	NULL	NULL	NULL	NULL	NULL	NULL	NULL	2	11	21	NULL	NULL	NULL	pra1	practiceList1	转基因大豆+有争议的	0		0	0	94975	0	f	480	95455	NULL	NULL
大创GO-NOGO	1	2	<?xml version="1.0"?>\n<Clock xmlns:dt="urn:schemas-microsoft-com:datatypes"><Description dt:dt="string">E-Prime Primary Realtime Clock</Description><StartTime><Timestamp dt:dt="int">0</Timestamp><DateUtc dt:dt="string">2021-12-20T08:40:27Z</DateUtc></StartTime><FrequencyChanges><FrequencyChange><Frequency dt:dt="r8">10000000</Frequency><Timestamp dt:dt="r8">305379635201</Timestamp><Current dt:dt…	60.005	1.0.0.33	1	438939341	2.0.10.182	12-20-2021	2021-12-20 08:40:27	16:40:27	2.0.10.92	1	affpro	WordList	1	1	1	22	f	NULL	NULL	NULL	NULL	NULL	12	NULL	NULL	NULL	1	11	22	NULL	NULL	NULL	pra1	practiceList1	转基因大豆+创新的	1	f	0	0	96192	0	f	450	96642	NULL	NULL
大创GO-NOGO	1	2	<?xml version="1.0"?>\n<Clock xmlns:dt="urn:schemas-microsoft-com:datatypes"><Description dt:dt="string">E-Prime Primary Realtime Clock</Description><StartTime><Timestamp dt:dt="int">0</Timestamp><DateUtc dt:dt="string">2021-12-20T08:40:27Z</DateUtc></StartTime><FrequencyChanges><FrequencyChange><Frequency dt:dt="r8">10000000</Frequency><Timestamp dt:dt="r8">305379635201</Timestamp><Current dt:dt…	60.005	1.0.0.33	1	438939341	2.0.10.182	12-20-2021	2021-12-20 08:40:27	16:40:27	2.0.10.92	1	affpro	WordList	1	1	1	23		NULL	5	NULL	NULL	NULL	NULL	NULL	NULL	NULL	2	12	23	NULL	NULL	NULL	pra1	practiceList1	抗虫害棉花+不成熟的	1		0	0	97375	1017		0	0	NULL	NULL
大创GO-NOGO	1	2	<?xml version="1.0"?>\n<Clock xmlns:dt="urn:schemas-microsoft-com:datatypes"><Description dt:dt="string">E-Prime Primary Realtime Clock</Description><StartTime><Timestamp dt:dt="int">0</Timestamp><DateUtc dt:dt="string">2021-12-20T08:40:27Z</DateUtc></StartTime><FrequencyChanges><FrequencyChange><Frequency dt:dt="r8">10000000</Frequency><Timestamp dt:dt="r8">305379635201</Timestamp><Current dt:dt…	60.005	1.0.0.33	1	438939341	2.0.10.182	12-20-2021	2021-12-20 08:40:27	16:40:27	2.0.10.92	1	affpro	WordList	1	1	1	24		NULL	8	NULL	NULL	NULL	NULL	NULL	NULL	NULL	2	12	24	NULL	NULL	NULL	pra1	practiceList1	抗虫害棉花+有争议的	1		0	0	99109	1016		0	0	NULL	NULL
大创GO-NOGO	1	2	<?xml version="1.0"?>\n<Clock xmlns:dt="urn:schemas-microsoft-com:datatypes"><Description dt:dt="string">E-Prime Primary Realtime Clock</Description><StartTime><Timestamp dt:dt="int">0</Timestamp><DateUtc dt:dt="string">2021-12-20T08:40:27Z</DateUtc></StartTime><FrequencyChanges><FrequencyChange><Frequency dt:dt="r8">10000000</Frequency><Timestamp dt:dt="r8">305379635201</Timestamp><Current dt:dt…	60.005	1.0.0.33	1	438939341	2.0.10.182	12-20-2021	2021-12-20 08:40:27	16:40:27	2.0.10.92	1	affpro	WordList	1	1	1	25		NULL	NULL	16	NULL	NULL	NULL	NULL	NULL	NULL	NULL	NULL	NULL	NULL	NULL	NULL	pra2	taskList1	动物转基因+有争议的	NULL	NULL	NULL	NULL	NULL	NULL	NULL	NULL	NULL	1
大创GO-NOGO	1	2	<?xml version="1.0"?>\n<Clock xmlns:dt="urn:schemas-microsoft-com:datatypes"><Description dt:dt="string">E-Prime Primary Realtime Clock</Description><StartTime><Timestamp dt:dt="int">0</Timestamp><DateUtc dt:dt="string">2021-12-20T08:40:27Z</DateUtc></StartTime><FrequencyChanges><FrequencyChange><Frequency dt:dt="r8">10000000</Frequency><Timestamp dt:dt="r8">305379635201</Timestamp><Current dt:dt…	60.005	1.0.0.33	1	438939341	2.0.10.182	12-20-2021	2021-12-20 08:40:27	16:40:27	2.0.10.92	1	affpro	WordList	1	1	1	26	f	NULL	NULL	NULL	NULL	NULL	NULL	7	NULL	NULL	NULL	NULL	NULL	NULL	NULL	NULL	pra2	taskList1	抗虫害棉花+高科技的	NULL	NULL	NULL	NULL	NULL	NULL	NULL	NULL	NULL	1	f
大创GO-NOGO	1	2	<?xml version="1.0"?>\n<Clock xmlns:dt="urn:schemas-microsoft-com:datatypes"><Description dt:dt="string">E-Prime Primary Realtime Clock</Description><StartTime><Timestamp dt:dt="int">0</Timestamp><DateUtc dt:dt="string">2021-12-20T08:40:27Z</DateUtc></StartTime><FrequencyChanges><FrequencyChange><Frequency dt:dt="r8">10000000</Frequency><Timestamp dt:dt="r8">305379635201</Timestamp><Current dt:dt…	60.005	1.0.0.33	1	438939341	2.0.10.182	12-20-2021	2021-12-20 08:40:27	16:40:27	2.0.10.92	1	affpro	WordList	1	1	1	27		NULL	NULL	11	NULL	NULL	NULL	NULL	NULL	NULL	NULL	NULL	NULL	NULL	NULL	NULL	pra2	taskList1	转基因大豆+非天然的	NULL	NULL	NULL	NULL	NULL	NULL	NULL	NULL	NULL	1
大创GO-NOGO	1	2	<?xml version="1.0"?>\n<Clock xmlns:dt="urn:schemas-microsoft-com:datatypes"><Description dt:dt="string">E-Prime Primary Realtime Clock</Description><StartTime><Timestamp dt:dt="int">0</Timestamp><DateUtc dt:dt="string">2021-12-20T08:40:27Z</DateUtc></StartTime><FrequencyChanges><FrequencyChange><Frequency dt:dt="r8">10000000</Frequency><Timestamp dt:dt="r8">305379635201</Timestamp><Current dt:dt…	60.005	1.0.0.33	1	438939341	2.0.10.182	12-20-2021	2021-12-20 08:40:27	16:40:27	2.0.10.92	1	affpro	WordList	1	1	1	28		NULL	NULL	9	NULL	NULL	NULL	NULL	NULL	NULL	NULL	NULL	NULL	NULL	NULL	NULL	pra2	taskList1	转基因大豆+不成熟的	NULL	NULL	NULL	NULL	NULL	NULL	NULL	NULL	NULL	1
大创GO-NOGO	1	2	<?xml version="1.0"?>\n<Clock xmlns:dt="urn:schemas-microsoft-com:datatypes"><Description dt:dt="string">E-Prime Primary Realtime Clock</Description><StartTime><Timestamp dt:dt="int">0</Timestamp><DateUtc dt:dt="string">2021-12-20T08:40:27Z</DateUtc></StartTime><FrequencyChanges><FrequencyChange><Frequency dt:dt="r8">10000000</Frequency><Timestamp dt:dt="r8">305379635201</Timestamp><Current dt:dt…	60.005	1.0.0.33	1	438939341	2.0.10.182	12-20-2021	2021-12-20 08:40:27	16:40:27	2.0.10.92	1	affpro	WordList	1	1	1	29	f	NULL	NULL	NULL	NULL	NULL	NULL	14	NULL	NULL	NULL	NULL	NULL	NULL	NULL	NULL	pra2	taskList1	动物转基因+高产的	NULL	NULL	NULL	NULL	NULL	NULL	NULL	NULL	NULL	1	f
大创GO-NOGO	1	2	<?xml version="1.0"?>\n<Clock xmlns:dt="urn:schemas-microsoft-com:datatypes"><Description dt:dt="string">E-Prime Primary Realtime Clock</Description><StartTime><Timestamp dt:dt="int">0</Timestamp><DateUtc dt:dt="string">2021-12-20T08:40:27Z</DateUtc></StartTime><FrequencyChanges><FrequencyChange><Frequency dt:dt="r8">10000000</Frequency><Timestamp dt:dt="r8">305379635201</Timestamp><Current dt:dt…	60.005	1.0.0.33	1	438939341	2.0.10.182	12-20-2021	2021-12-20 08:40:27	16:40:27	2.0.10.92	1	affpro	WordList	1	1	1	30		NULL	NULL	7	NULL	NULL	NULL	NULL	NULL	NULL	NULL	NULL	NULL	NULL	NULL	NULL	pra2	taskList1	抗虫害棉花+非天然的	NULL	NULL	NULL	NULL	NULL	NULL	NULL	NULL	NULL	1
大创GO-NOGO	1	2	<?xml version="1.0"?>\n<Clock xmlns:dt="urn:schemas-microsoft-com:datatypes"><Description dt:dt="string">E-Prime Primary Realtime Clock</Description><StartTime><Timestamp dt:dt="int">0</Timestamp><DateUtc dt:dt="string">2021-12-20T08:40:27Z</DateUtc></StartTime><FrequencyChanges><FrequencyChange><Frequency dt:dt="r8">10000000</Frequency><Timestamp dt:dt="r8">305379635201</Timestamp><Current dt:dt…	60.005	1.0.0.33	1	438939341	2.0.10.182	12-20-2021	2021-12-20 08:40:27	16:40:27	2.0.10.92	1	affpro	WordList	1	1	1	31	f	NULL	NULL	NULL	NULL	NULL	NULL	15	NULL	NULL	NULL	NULL	NULL	NULL	NULL	NULL	pra2	taskList1	动物转基因+高科技的	NULL	NULL	NULL	NULL	NULL	NULL	NULL	NULL	NULL	1	f
大创GO-NOGO	1	2	<?xml version="1.0"?>\n<Clock xmlns:dt="urn:schemas-microsoft-com:datatypes"><Description dt:dt="string">E-Prime Primary Realtime Clock</Description><StartTime><Timestamp dt:dt="int">0</Timestamp><DateUtc dt:dt="string">2021-12-20T08:40:27Z</DateUtc></StartTime><FrequencyChanges><FrequencyChange><Frequency dt:dt="r8">10000000</Frequency><Timestamp dt:dt="r8">305379635201</Timestamp><Current dt:dt…	60.005	1.0.0.33	1	438939341	2.0.10.182	12-20-2021	2021-12-20 08:40:27	16:40:27	2.0.10.92	1	affpro	WordList	1	1	1	32		NULL	NULL	6	NULL	NULL	NULL	NULL	NULL	NULL	NULL	NULL	NULL	NULL	NULL	NULL	pra2	taskList1	抗虫害棉花+高风险的	NULL	NULL	NULL	NULL	NULL	NULL	NULL	NULL	NULL	1
大创GO-NOGO	1	2	<?xml version="1.0"?>\n<Clock xmlns:dt="urn:schemas-microsoft-com:datatypes"><Description dt:dt="string">E-Prime Primary Realtime Clock</Description><StartTime><Timestamp dt:dt="int">0</Timestamp><DateUtc dt:dt="string">2021-12-20T08:40:27Z</DateUtc></StartTime><FrequencyChanges><FrequencyChange><Frequency dt:dt="r8">10000000</Frequency><Timestamp dt:dt="r8">305379635201</Timestamp><Current dt:dt…	60.005	1.0.0.33	1	438939341	2.0.10.182	12-20-2021	2021-12-20 08:40:27	16:40:27	2.0.10.92	1	affpro	WordList	1	1	1	33		NULL	NULL	14	NULL	NULL	NULL	NULL	NULL	NULL	NULL	NULL	NULL	NULL	NULL	NULL	pra2	taskList1	动物转基因+高风险的	NULL	NULL	NULL	NULL	NULL	NULL	NULL	NULL	NULL	1
大创GO-NOGO	1	2	<?xml version="1.0"?>\n<Clock xmlns:dt="urn:schemas-microsoft-com:datatypes"><Description dt:dt="string">E-Prime Primary Realtime Clock</Description><StartTime><Timestamp dt:dt="int">0</Timestamp><DateUtc dt:dt="string">2021-12-20T08:40:27Z</DateUtc></StartTime><FrequencyChanges><FrequencyChange><Frequency dt:dt="r8">10000000</Frequency><Timestamp dt:dt="r8">305379635201</Timestamp><Current dt:dt…	60.005	1.0.0.33	1	438939341	2.0.10.182	12-20-2021	2021-12-20 08:40:27	16:40:27	2.0.10.92	1	affpro	WordList	1	1	1	34		NULL	NULL	10	NULL	NULL	NULL	NULL	NULL	NULL	NULL	NULL	NULL	NULL	NULL	NULL	pra2	taskList1	转基因大豆+高风险的	NULL	NULL	NULL	NULL	NULL	NULL	NULL	NULL	NULL	1
大创GO-NOGO	1	2	<?xml version="1.0"?>\n<Clock xmlns:dt="urn:schemas-microsoft-com:datatypes"><Description dt:dt="string">E-Prime Primary Realtime Clock</Description><StartTime><Timestamp dt:dt="int">0</Timestamp><DateUtc dt:dt="string">2021-12-20T08:40:27Z</DateUtc></StartTime><FrequencyChanges><FrequencyChange><Frequency dt:dt="r8">10000000</Frequency><Timestamp dt:dt="r8">305379635201</Timestamp><Current dt:dt…	60.005	1.0.0.33	1	438939341	2.0.10.182	12-20-2021	2021-12-20 08:40:27	16:40:27	2.0.10.92	1	affpro	WordList	1	1	1	35	f	NULL	NULL	NULL	NULL	NULL	NULL	3	NULL	NULL	NULL	NULL	NULL	NULL	NULL	NULL	pra2	taskList1	转基因食物+高科技的	NULL	NULL	NULL	NULL	NULL	NULL	NULL	NULL	NULL	1	f
大创GO-NOGO	1	2	<?xml version="1.0"?>\n<Clock xmlns:dt="urn:schemas-microsoft-com:datatypes"><Description dt:dt="string">E-Prime Primary Realtime Clock</Description><StartTime><Timestamp dt:dt="int">0</Timestamp><DateUtc dt:dt="string">2021-12-20T08:40:27Z</DateUtc></StartTime><FrequencyChanges><FrequencyChange><Frequency dt:dt="r8">10000000</Frequency><Timestamp dt:dt="r8">305379635201</Timestamp><Current dt:dt…	60.005	1.0.0.33	1	438939341	2.0.10.182	12-20-2021	2021-12-20 08:40:27	16:40:27	2.0.10.92	1	affpro	WordList	1	1	1	36		NULL	NULL	12	NULL	NULL	NULL	NULL	NULL	NULL	NULL	NULL	NULL	NULL	NULL	NULL	pra2	taskList1	转基因大豆+有争议的	NULL	NULL	NULL	NULL	NULL	NULL	NULL	NULL	NULL	1
大创GO-NOGO	1	2	<?xml version="1.0"?>\n<Clock xmlns:dt="urn:schemas-microsoft-com:datatypes"><Description dt:dt="string">E-Prime Primary Realtime Clock</Description><StartTime><Timestamp dt:dt="int">0</Timestamp><DateUtc dt:dt="string">2021-12-20T08:40:27Z</DateUtc></StartTime><FrequencyChanges><FrequencyChange><Frequency dt:dt="r8">10000000</Frequency><Timestamp dt:dt="r8">305379635201</Timestamp><Current dt:dt…	60.005	1.0.0.33	1	438939341	2.0.10.182	12-20-2021	2021-12-20 08:40:27	16:40:27	2.0.10.92	1	affpro	WordList	1	1	1	37		NULL	NULL	8	NULL	NULL	NULL	NULL	NULL	NULL	NULL	NULL	NULL	NULL	NULL	NULL	pra2	taskList1	抗虫害棉花+有争议的	NULL	NULL	NULL	NULL	NULL	NULL	NULL	NULL	NULL	1
大创GO-NOGO	1	2	<?xml version="1.0"?>\n<Clock xmlns:dt="urn:schemas-microsoft-com:datatypes"><Description dt:dt="string">E-Prime Primary Realtime Clock</Description><StartTime><Timestamp dt:dt="int">0</Timestamp><DateUtc dt:dt="string">2021-12-20T08:40:27Z</DateUtc></StartTime><FrequencyChanges><FrequencyChange><Frequency dt:dt="r8">10000000</Frequency><Timestamp dt:dt="r8">305379635201</Timestamp><Current dt:dt…	60.005	1.0.0.33	1	438939341	2.0.10.182	12-20-2021	2021-12-20 08:40:27	16:40:27	2.0.10.92	1	affpro	WordList	1	1	1	38		NULL	NULL	5	NULL	NULL	NULL	NULL	NULL	NULL	NULL	NULL	NULL	NULL	NULL	NULL	pra2	taskList1	抗虫害棉花+不成熟的	NULL	NULL	NULL	NULL	NULL	NULL	NULL	NULL	NULL	1
大创GO-NOGO	1	2	<?xml version="1.0"?>\n<Clock xmlns:dt="urn:schemas-microsoft-com:datatypes"><Description dt:dt="string">E-Prime Primary Realtime Clock</Description><StartTime><Timestamp dt:dt="int">0</Timestamp><DateUtc dt:dt="string">2021-12-20T08:40:27Z</DateUtc></StartTime><FrequencyChanges><FrequencyChange><Frequency dt:dt="r8">10000000</Frequency><Timestamp dt:dt="r8">305379635201</Timestamp><Current dt:dt…	60.005	1.0.0.33	1	438939341	2.0.10.182	12-20-2021	2021-12-20 08:40:27	16:40:27	2.0.10.92	1	affpro	WordList	1	1	1	39		NULL	NULL	3	NULL	NULL	NULL	NULL	NULL	NULL	NULL	NULL	NULL	NULL	NULL	NULL	pra2	taskList1	转基因食物+非天然的	NULL	NULL	NULL	NULL	NULL	NULL	NULL	NULL	NULL	1
大创GO-NOGO	1	2	<?xml version="1.0"?>\n<Clock xmlns:dt="urn:schemas-microsoft-com:datatypes"><Description dt:dt="string">E-Prime Primary Realtime Clock</Description><StartTime><Timestamp dt:dt="int">0</Timestamp><DateUtc dt:dt="string">2021-12-20T08:40:27Z</DateUtc></StartTime><FrequencyChanges><FrequencyChange><Frequency dt:dt="r8">10000000</Frequency><Timestamp dt:dt="r8">305379635201</Timestamp><Current dt:dt…	60.005	1.0.0.33	1	438939341	2.0.10.182	12-20-2021	2021-12-20 08:40:27	16:40:27	2.0.10.92	1	affpro	WordList	1	1	1	40		NULL	NULL	1	NULL	NULL	NULL	NULL	NULL	NULL	NULL	NULL	NULL	NULL	NULL	NULL	pra2	taskList1	转基因食物+不成熟的	NULL	NULL	NULL	NULL	NULL	NULL	NULL	NULL	NULL	1
大创GO-NOGO	1	2	<?xml version="1.0"?>\n<Clock xmlns:dt="urn:schemas-microsoft-com:datatypes"><Description dt:dt="string">E-Prime Primary Realtime Clock</Description><StartTime><Timestamp dt:dt="int">0</Timestamp><DateUtc dt:dt="string">2021-12-20T08:40:27Z</DateUtc></StartTime><FrequencyChanges><FrequencyChange><Frequency dt:dt="r8">10000000</Frequency><Timestamp dt:dt="r8">305379635201</Timestamp><Current dt:dt…	60.005	1.0.0.33	1	438939341	2.0.10.182	12-20-2021	2021-12-20 08:40:27	16:40:27	2.0.10.92	1	affpro	WordList	1	1	1	41	f	NULL	NULL	NULL	NULL	NULL	NULL	11	NULL	NULL	NULL	NULL	NULL	NULL	NULL	NULL	pra2	taskList1	转基因大豆+高科技的	NULL	NULL	NULL	NULL	NULL	NULL	NULL	NULL	NULL	1	f
大创GO-NOGO	1	2	<?xml version="1.0"?>\n<Clock xmlns:dt="urn:schemas-microsoft-com:datatypes"><Description dt:dt="string">E-Prime Primary Realtime Clock</Description><StartTime><Timestamp dt:dt="int">0</Timestamp><DateUtc dt:dt="string">2021-12-20T08:40:27Z</DateUtc></StartTime><FrequencyChanges><FrequencyChange><Frequency dt:dt="r8">10000000</Frequency><Timestamp dt:dt="r8">305379635201</Timestamp><Current dt:dt…	60.005	1.0.0.33	1	438939341	2.0.10.182	12-20-2021	2021-12-20 08:40:27	16:40:27	2.0.10.92	1	affpro	WordList	1	1	1	42	f	NULL	NULL	NULL	NULL	NULL	NULL	8	NULL	NULL	NULL	NULL	NULL	NULL	NULL	NULL	pra2	taskList1	抗虫害棉花+创新的	NULL	NULL	NULL	NULL	NULL	NULL	NULL	NULL	NULL	1	f
大创GO-NOGO	1	2	<?xml version="1.0"?>\n<Clock xmlns:dt="urn:schemas-microsoft-com:datatypes"><Description dt:dt="string">E-Prime Primary Realtime Clock</Description><StartTime><Timestamp dt:dt="int">0</Timestamp><DateUtc dt:dt="string">2021-12-20T08:40:27Z</DateUtc></StartTime><FrequencyChanges><FrequencyChange><Frequency dt:dt="r8">10000000</Frequency><Timestamp dt:dt="r8">305379635201</Timestamp><Current dt:dt…	60.005	1.0.0.33	1	438939341	2.0.10.182	12-20-2021	2021-12-20 08:40:27	16:40:27	2.0.10.92	1	affpro	WordList	1	1	1	43		NULL	NULL	2	NULL	NULL	NULL	NULL	NULL	NULL	NULL	NULL	NULL	NULL	NULL	NULL	pra2	taskList1	转基因食物+高风险的	NULL	NULL	NULL	NULL	NULL	NULL	NULL	NULL	NULL	1
大创GO-NOGO	1	2	<?xml version="1.0"?>\n<Clock xmlns:dt="urn:schemas-microsoft-com:datatypes"><Description dt:dt="string">E-Prime Primary Realtime Clock</Description><StartTime><Timestamp dt:dt="int">0</Timestamp><DateUtc dt:dt="string">2021-12-20T08:40:27Z</DateUtc></StartTime><FrequencyChanges><FrequencyChange><Frequency dt:dt="r8">10000000</Frequency><Timestamp dt:dt="r8">305379635201</Timestamp><Current dt:dt…	60.005	1.0.0.33	1	438939341	2.0.10.182	12-20-2021	2021-12-20 08:40:27	16:40:27	2.0.10.92	1	affpro	WordList	1	1	1	44	f	NULL	NULL	NULL	NULL	NULL	NULL	16	NULL	NULL	NULL	NULL	NULL	NULL	NULL	NULL	pra2	taskList1	动物转基因+创新的	NULL	NULL	NULL	NULL	NULL	NULL	NULL	NULL	NULL	1	f
大创GO-NOGO	1	2	<?xml version="1.0"?>\n<Clock xmlns:dt="urn:schemas-microsoft-com:datatypes"><Description dt:dt="string">E-Prime Primary Realtime Clock</Description><StartTime><Timestamp dt:dt="int">0</Timestamp><DateUtc dt:dt="string">2021-12-20T08:40:27Z</DateUtc></StartTime><FrequencyChanges><FrequencyChange><Frequency dt:dt="r8">10000000</Frequency><Timestamp dt:dt="r8">305379635201</Timestamp><Current dt:dt…	60.005	1.0.0.33	1	438939341	2.0.10.182	12-20-2021	2021-12-20 08:40:27	16:40:27	2.0.10.92	1	affpro	WordList	1	1	1	45		NULL	NULL	15	NULL	NULL	NULL	NULL	NULL	NULL	NULL	NULL	NULL	NULL	NULL	NULL	pra2	taskList1	动物转基因+非天然的	NULL	NULL	NULL	NULL	NULL	NULL	NULL	NULL	NULL	1
大创GO-NOGO	1	2	<?xml version="1.0"?>\n<Clock xmlns:dt="urn:schemas-microsoft-com:datatypes"><Description dt:dt="string">E-Prime Primary Realtime Clock</Description><StartTime><Timestamp dt:dt="int">0</Timestamp><DateUtc dt:dt="string">2021-12-20T08:40:27Z</DateUtc></StartTime><FrequencyChanges><FrequencyChange><Frequency dt:dt="r8">10000000</Frequency><Timestamp dt:dt="r8">305379635201</Timestamp><Current dt:dt…	60.005	1.0.0.33	1	438939341	2.0.10.182	12-20-2021	2021-12-20 08:40:27	16:40:27	2.0.10.92	1	affpro	WordList	1	1	1	46		NULL	NULL	4	NULL	NULL	NULL	NULL	NULL	NULL	NULL	NULL	NULL	NULL	NULL	NULL	pra2	taskList1	转基因食物+有争议的	NULL	NULL	NULL	NULL	NULL	NULL	NULL	NULL	NULL	1
大创GO-NOGO	1	2	<?xml version="1.0"?>\n<Clock xmlns:dt="urn:schemas-microsoft-com:datatypes"><Description dt:dt="string">E-Prime Primary Realtime Clock</Description><StartTime><Timestamp dt:dt="int">0</Timestamp><DateUtc dt:dt="string">2021-12-20T08:40:27Z</DateUtc></StartTime><FrequencyChanges><FrequencyChange><Frequency dt:dt="r8">10000000</Frequency><Timestamp dt:dt="r8">305379635201</Timestamp><Current dt:dt…	60.005	1.0.0.33	1	438939341	2.0.10.182	12-20-2021	2021-12-20 08:40:27	16:40:27	2.0.10.92	1	affpro	WordList	1	1	1	47	f	NULL	NULL	NULL	NULL	NULL	NULL	4	NULL	NULL	NULL	NULL	NULL	NULL	NULL	NULL	pra2	taskList1	转基因食物+创新的	NULL	NULL	NULL	NULL	NULL	NULL	NULL	NULL	NULL	1	f
大创GO-NOGO	1	2	<?xml version="1.0"?>\n<Clock xmlns:dt="urn:schemas-microsoft-com:datatypes"><Description dt:dt="string">E-Prime Primary Realtime Clock</Description><StartTime><Timestamp dt:dt="int">0</Timestamp><DateUtc dt:dt="string">2021-12-20T08:40:27Z</DateUtc></StartTime><FrequencyChanges><FrequencyChange><Frequency dt:dt="r8">10000000</Frequency><Timestamp dt:dt="r8">305379635201</Timestamp><Current dt:dt…	60.005	1.0.0.33	1	438939341	2.0.10.182	12-20-2021	2021-12-20 08:40:27	16:40:27	2.0.10.92	1	affpro	WordList	1	1	1	48	f	NULL	NULL	NULL	NULL	NULL	NULL	2	NULL	NULL	NULL	NULL	NULL	NULL	NULL	NULL	pra2	taskList1	转基因食物+高产的	NULL	NULL	NULL	NULL	NULL	NULL	NULL	NULL	NULL	1	f
大创GO-NOGO	1	2	<?xml version="1.0"?>\n<Clock xmlns:dt="urn:schemas-microsoft-com:datatypes"><Description dt:dt="string">E-Prime Primary Realtime Clock</Description><StartTime><Timestamp dt:dt="int">0</Timestamp><DateUtc dt:dt="string">2021-12-20T08:40:27Z</DateUtc></StartTime><FrequencyChanges><FrequencyChange><Frequency dt:dt="r8">10000000</Frequency><Timestamp dt:dt="r8">305379635201</Timestamp><Current dt:dt…	60.005	1.0.0.33	1	438939341	2.0.10.182	12-20-2021	2021-12-20 08:40:27	16:40:27	2.0.10.92	1	affpro	WordList	1	1	1	49		NULL	NULL	13	NULL	NULL	NULL	NULL	NULL	NULL	NULL	NULL	NULL	NULL	NULL	NULL	pra2	taskList1	动物转基因+不成熟的	NULL	NULL	NULL	NULL	NULL	NULL	NULL	NULL	NULL	1
大创GO-NOGO	1	2	<?xml version="1.0"?>\n<Clock xmlns:dt="urn:schemas-microsoft-com:datatypes"><Description dt:dt="string">E-Prime Primary Realtime Clock</Description><StartTime><Timestamp dt:dt="int">0</Timestamp><DateUtc dt:dt="string">2021-12-20T08:40:27Z</DateUtc></StartTime><FrequencyChanges><FrequencyChange><Frequency dt:dt="r8">10000000</Frequency><Timestamp dt:dt="r8">305379635201</Timestamp><Current dt:dt…	60.005	1.0.0.33	1	438939341	2.0.10.182	12-20-2021	2021-12-20 08:40:27	16:40:27	2.0.10.92	1	affpro	WordList	1	1	1	50	f	NULL	NULL	NULL	NULL	NULL	NULL	12	NULL	NULL	NULL	NULL	NULL	NULL	NULL	NULL	pra2	taskList1	转基因大豆+创新的	NULL	NULL	NULL	NULL	NULL	NULL	NULL	NULL	NULL	1	f
大创GO-NOGO	1	2	<?xml version="1.0"?>\n<Clock xmlns:dt="urn:schemas-microsoft-com:datatypes"><Description dt:dt="string">E-Prime Primary Realtime Clock</Description><StartTime><Timestamp dt:dt="int">0</Timestamp><DateUtc dt:dt="string">2021-12-20T08:40:27Z</DateUtc></StartTime><FrequencyChanges><FrequencyChange><Frequency dt:dt="r8">10000000</Frequency><Timestamp dt:dt="r8">305379635201</Timestamp><Current dt:dt…	60.005	1.0.0.33	1	438939341	2.0.10.182	12-20-2021	2021-12-20 08:40:27	16:40:27	2.0.10.92	1	affpro	WordList	1	1	1	51		NULL	NULL	12	NULL	NULL	NULL	NULL	NULL	NULL	NULL	NULL	NULL	NULL	NULL	NULL	pra2	taskList1	转基因大豆+有争议的	NULL	NULL	NULL	NULL	NULL	NULL	NULL	NULL	NULL	1
大创GO-NOGO	1	2	<?xml version="1.0"?>\n<Clock xmlns:dt="urn:schemas-microsoft-com:datatypes"><Description dt:dt="string">E-Prime Primary Realtime Clock</Description><StartTime><Timestamp dt:dt="int">0</Timestamp><DateUtc dt:dt="string">2021-12-20T08:40:27Z</DateUtc></StartTime><FrequencyChanges><FrequencyChange><Frequency dt:dt="r8">10000000</Frequency><Timestamp dt:dt="r8">305379635201</Timestamp><Current dt:dt…	60.005	1.0.0.33	1	438939341	2.0.10.182	12-20-2021	2021-12-20 08:40:27	16:40:27	2.0.10.92	1	affpro	WordList	1	1	1	52		NULL	NULL	9	NULL	NULL	NULL	NULL	NULL	NULL	NULL	NULL	NULL	NULL	NULL	NULL	pra2	taskList1	转基因大豆+不成熟的	NULL	NULL	NULL	NULL	NULL	NULL	NULL	NULL	NULL	1
大创GO-NOGO	1	2	<?xml version="1.0"?>\n<Clock xmlns:dt="urn:schemas-microsoft-com:datatypes"><Description dt:dt="string">E-Prime Primary Realtime Clock</Description><StartTime><Timestamp dt:dt="int">0</Timestamp><DateUtc dt:dt="string">2021-12-20T08:40:27Z</DateUtc></StartTime><FrequencyChanges><FrequencyChange><Frequency dt:dt="r8">10000000</Frequency><Timestamp dt:dt="r8">305379635201</Timestamp><Current dt:dt…	60.005	1.0.0.33	1	438939341	2.0.10.182	12-20-2021	2021-12-20 08:40:27	16:40:27	2.0.10.92	1	affpro	WordList	1	1	1	53		NULL	NULL	11	NULL	NULL	NULL	NULL	NULL	NULL	NULL	NULL	NULL	NULL	NULL	NULL	pra2	taskList1	转基因大豆+非天然的	NULL	NULL	NULL	NULL	NULL	NULL	NULL	NULL	NULL	1
大创GO-NOGO	1	2	<?xml version="1.0"?>\n<Clock xmlns:dt="urn:schemas-microsoft-com:datatypes"><Description dt:dt="string">E-Prime Primary Realtime Clock</Description><StartTime><Timestamp dt:dt="int">0</Timestamp><DateUtc dt:dt="string">2021-12-20T08:40:27Z</DateUtc></StartTime><FrequencyChanges><FrequencyChange><Frequency dt:dt="r8">10000000</Frequency><Timestamp dt:dt="r8">305379635201</Timestamp><Current dt:dt…	60.005	1.0.0.33	1	438939341	2.0.10.182	12-20-2021	2021-12-20 08:40:27	16:40:27	2.0.10.92	1	affpro	WordList	1	1	1	54	f	NULL	NULL	NULL	NULL	NULL	NULL	5	NULL	NULL	NULL	NULL	NULL	NULL	NULL	NULL	pra2	taskList1	抗虫害棉花+科学的	NULL	NULL	NULL	NULL	NULL	NULL	NULL	NULL	NULL	1	f
大创GO-NOGO	1	2	<?xml version="1.0"?>\n<Clock xmlns:dt="urn:schemas-microsoft-com:datatypes"><Description dt:dt="string">E-Prime Primary Realtime Clock</Description><StartTime><Timestamp dt:dt="int">0</Timestamp><DateUtc dt:dt="string">2021-12-20T08:40:27Z</DateUtc></StartTime><FrequencyChanges><FrequencyChange><Frequency dt:dt="r8">10000000</Frequency><Timestamp dt:dt="r8">305379635201</Timestamp><Current dt:dt…	60.005	1.0.0.33	1	438939341	2.0.10.182	12-20-2021	2021-12-20 08:40:27	16:40:27	2.0.10.92	1	affpro	WordList	1	1	1	55	f	NULL	NULL	NULL	NULL	NULL	NULL	9	NULL	NULL	NULL	NULL	NULL	NULL	NULL	NULL	pra2	taskList1	转基因大豆+科学的	NULL	NULL	NULL	NULL	NULL	NULL	NULL	NULL	NULL	1	f
大创GO-NOGO	1	2	<?xml version="1.0"?>\n<Clock xmlns:dt="urn:schemas-microsoft-com:datatypes"><Description dt:dt="string">E-Prime Primary Realtime Clock</Description><StartTime><Timestamp dt:dt="int">0</Timestamp><DateUtc dt:dt="string">2021-12-20T08:40:27Z</DateUtc></StartTime><FrequencyChanges><FrequencyChange><Frequency dt:dt="r8">10000000</Frequency><Timestamp dt:dt="r8">305379635201</Timestamp><Current dt:dt…	60.005	1.0.0.33	1	438939341	2.0.10.182	12-20-2021	2021-12-20 08:40:27	16:40:27	2.0.10.92	1	affpro	WordList	1	1	1	56		NULL	NULL	7	NULL	NULL	NULL	NULL	NULL	NULL	NULL	NULL	NULL	NULL	NULL	NULL	pra2	taskList1	抗虫害棉花+非天然的	NULL	NULL	NULL	NULL	NULL	NULL	NULL	NULL	NULL	1
大创GO-NOGO	1	2	<?xml version="1.0"?>\n<Clock xmlns:dt="urn:schemas-microsoft-com:datatypes"><Description dt:dt="string">E-Prime Primary Realtime Clock</Description><StartTime><Timestamp dt:dt="int">0</Timestamp><DateUtc dt:dt="string">2021-12-20T08:40:27Z</DateUtc></StartTime><FrequencyChanges><FrequencyChange><Frequency dt:dt="r8">10000000</Frequency><Timestamp dt:dt="r8">305379635201</Timestamp><Current dt:dt…	60.005	1.0.0.33	1	438939341	2.0.10.182	12-20-2021	2021-12-20 08:40:27	16:40:27	2.0.10.92	1	affpro	WordList	1	1	1	57		NULL	NULL	3	NULL	NULL	NULL	NULL	NULL	NULL	NULL	NULL	NULL	NULL	NULL	NULL	pra2	taskList1	转基因食物+非天然的	NULL	NULL	NULL	NULL	NULL	NULL	NULL	NULL	NULL	1
大创GO-NOGO	1	2	<?xml version="1.0"?>\n<Clock xmlns:dt="urn:schemas-microsoft-com:datatypes"><Description dt:dt="string">E-Prime Primary Realtime Clock</Description><StartTime><Timestamp dt:dt="int">0</Timestamp><DateUtc dt:dt="string">2021-12-20T08:40:27Z</DateUtc></StartTime><FrequencyChanges><FrequencyChange><Frequency dt:dt="r8">10000000</Frequency><Timestamp dt:dt="r8">305379635201</Timestamp><Current dt:dt…	60.005	1.0.0.33	1	438939341	2.0.10.182	12-20-2021	2021-12-20 08:40:27	16:40:27	2.0.10.92	1	affpro	WordList	1	1	1	58		NULL	NULL	5	NULL	NULL	NULL	NULL	NULL	NULL	NULL	NULL	NULL	NULL	NULL	NULL	pra2	taskList1	抗虫害棉花+不成熟的	NULL	NULL	NULL	NULL	NULL	NULL	NULL	NULL	NULL	1
大创GO-NOGO	1	2	<?xml version="1.0"?>\n<Clock xmlns:dt="urn:schemas-microsoft-com:datatypes"><Description dt:dt="string">E-Prime Primary Realtime Clock</Description><StartTime><Timestamp dt:dt="int">0</Timestamp><DateUtc dt:dt="string">2021-12-20T08:40:27Z</DateUtc></StartTime><FrequencyChanges><FrequencyChange><Frequency dt:dt="r8">10000000</Frequency><Timestamp dt:dt="r8">305379635201</Timestamp><Current dt:dt…	60.005	1.0.0.33	1	438939341	2.0.10.182	12-20-2021	2021-12-20 08:40:27	16:40:27	2.0.10.92	1	affpro	WordList	1	1	1	59	f	NULL	NULL	NULL	NULL	NULL	NULL	1	NULL	NULL	NULL	NULL	NULL	NULL	NULL	NULL	pra2	taskList1	转基因食物+科学的	NULL	NULL	NULL	NULL	NULL	NULL	NULL	NULL	NULL	1	f
大创GO-NOGO	1	2	<?xml version="1.0"?>\n<Clock xmlns:dt="urn:schemas-microsoft-com:datatypes"><Description dt:dt="string">E-Prime Primary Realtime Clock</Description><StartTime><Timestamp dt:dt="int">0</Timestamp><DateUtc dt:dt="string">2021-12-20T08:40:27Z</DateUtc></StartTime><FrequencyChanges><FrequencyChange><Frequency dt:dt="r8">10000000</Frequency><Timestamp dt:dt="r8">305379635201</Timestamp><Current dt:dt…	60.005	1.0.0.33	1	438939341	2.0.10.182	12-20-2021	2021-12-20 08:40:27	16:40:27	2.0.10.92	1	affpro	WordList	1	1	1	60		NULL	NULL	15	NULL	NULL	NULL	NULL	NULL	NULL	NULL	NULL	NULL	NULL	NULL	NULL	pra2	taskList1	动物转基因+非天然的	NULL	NULL	NULL	NULL	NULL	NULL	NULL	NULL	NULL	1
大创GO-NOGO	1	2	<?xml version="1.0"?>\n<Clock xmlns:dt="urn:schemas-microsoft-com:datatypes"><Description dt:dt="string">E-Prime Primary Realtime Clock</Description><StartTime><Timestamp dt:dt="int">0</Timestamp><DateUtc dt:dt="string">2021-12-20T08:40:27Z</DateUtc></StartTime><FrequencyChanges><FrequencyChange><Frequency dt:dt="r8">10000000</Frequency><Timestamp dt:dt="r8">305379635201</Timestamp><Current dt:dt…	60.005	1.0.0.33	1	438939341	2.0.10.182	12-20-2021	2021-12-20 08:40:27	16:40:27	2.0.10.92	1	affpro	WordList	1	1	1	61	f	NULL	NULL	NULL	NULL	NULL	NULL	6	NULL	NULL	NULL	NULL	NULL	NULL	NULL	NULL	pra2	taskList1	抗虫害棉花+高产的	NULL	NULL	NULL	NULL	NULL	NULL	NULL	NULL	NULL	1	f
大创GO-NOGO	1	2	<?xml version="1.0"?>\n<Clock xmlns:dt="urn:schemas-microsoft-com:datatypes"><Description dt:dt="string">E-Prime Primary Realtime Clock</Description><StartTime><Timestamp dt:dt="int">0</Timestamp><DateUtc dt:dt="string">2021-12-20T08:40:27Z</DateUtc></StartTime><FrequencyChanges><FrequencyChange><Frequency dt:dt="r8">10000000</Frequency><Timestamp dt:dt="r8">305379635201</Timestamp><Current dt:dt…	60.005	1.0.0.33	1	438939341	2.0.10.182	12-20-2021	2021-12-20 08:40:27	16:40:27	2.0.10.92	1	affpro	WordList	1	1	1	62		NULL	NULL	2	NULL	NULL	NULL	NULL	NULL	NULL	NULL	NULL	NULL	NULL	NULL	NULL	pra2	taskList1	转基因食物+高风险的	NULL	NULL	NULL	NULL	NULL	NULL	NULL	NULL	NULL	0
大创GO-NOGO	1	2	<?xml version="1.0"?>\n<Clock xmlns:dt="urn:schemas-microsoft-com:datatypes"><Description dt:dt="string">E-Prime Primary Realtime Clock</Description><StartTime><Timestamp dt:dt="int">0</Timestamp><DateUtc dt:dt="string">2021-12-20T08:40:27Z</DateUtc></StartTime><FrequencyChanges><FrequencyChange><Frequency dt:dt="r8">10000000</Frequency><Timestamp dt:dt="r8">305379635201</Timestamp><Current dt:dt…	60.005	1.0.0.33	1	438939341	2.0.10.182	12-20-2021	2021-12-20 08:40:27	16:40:27	2.0.10.92	1	affpro	WordList	1	1	1	63		NULL	NULL	8	NULL	NULL	NULL	NULL	NULL	NULL	NULL	NULL	NULL	NULL	NULL	NULL	pra2	taskList1	抗虫害棉花+有争议的	NULL	NULL	NULL	NULL	NULL	NULL	NULL	NULL	NULL	1
大创GO-NOGO	1	2	<?xml version="1.0"?>\n<Clock xmlns:dt="urn:schemas-microsoft-com:datatypes"><Description dt:dt="string">E-Prime Primary Realtime Clock</Description><StartTime><Timestamp dt:dt="int">0</Timestamp><DateUtc dt:dt="string">2021-12-20T08:40:27Z</DateUtc></StartTime><FrequencyChanges><FrequencyChange><Frequency dt:dt="r8">10000000</Frequency><Timestamp dt:dt="r8">305379635201</Timestamp><Current dt:dt…	60.005	1.0.0.33	1	438939341	2.0.10.182	12-20-2021	2021-12-20 08:40:27	16:40:27	2.0.10.92	1	affpro	WordList	1	1	1	64		NULL	NULL	16	NULL	NULL	NULL	NULL	NULL	NULL	NULL	NULL	NULL	NULL	NULL	NULL	pra2	taskList1	动物转基因+有争议的	NULL	NULL	NULL	NULL	NULL	NULL	NULL	NULL	NULL	1
大创GO-NOGO	1	2	<?xml version="1.0"?>\n<Clock xmlns:dt="urn:schemas-microsoft-com:datatypes"><Description dt:dt="string">E-Prime Primary Realtime Clock</Description><StartTime><Timestamp dt:dt="int">0</Timestamp><DateUtc dt:dt="string">2021-12-20T08:40:27Z</DateUtc></StartTime><FrequencyChanges><FrequencyChange><Frequency dt:dt="r8">10000000</Frequency><Timestamp dt:dt="r8">305379635201</Timestamp><Current dt:dt…	60.005	1.0.0.33	1	438939341	2.0.10.182	12-20-2021	2021-12-20 08:40:27	16:40:27	2.0.10.92	1	affpro	WordList	1	1	1	65	f	NULL	NULL	NULL	NULL	NULL	NULL	10	NULL	NULL	NULL	NULL	NULL	NULL	NULL	NULL	pra2	taskList1	转基因大豆+高产的	NULL	NULL	NULL	NULL	NULL	NULL	NULL	NULL	NULL	1	f
大创GO-NOGO	1	2	<?xml version="1.0"?>\n<Clock xmlns:dt="urn:schemas-microsoft-com:datatypes"><Description dt:dt="string">E-Prime Primary Realtime Clock</Description><StartTime><Timestamp dt:dt="int">0</Timestamp><DateUtc dt:dt="string">2021-12-20T08:40:27Z</DateUtc></StartTime><FrequencyChanges><FrequencyChange><Frequency dt:dt="r8">10000000</Frequency><Timestamp dt:dt="r8">305379635201</Timestamp><Current dt:dt…	60.005	1.0.0.33	1	438939341	2.0.10.182	12-20-2021	2021-12-20 08:40:27	16:40:27	2.0.10.92	1	affpro	WordList	1	1	1	66	f	NULL	NULL	NULL	NULL	NULL	NULL	13	NULL	NULL	NULL	NULL	NULL	NULL	NULL	NULL	pra2	taskList1	动物转基因+科学的	NULL	NULL	NULL	NULL	NULL	NULL	NULL	NULL	NULL	1	f
大创GO-NOGO	1	2	<?xml version="1.0"?>\n<Clock xmlns:dt="urn:schemas-microsoft-com:datatypes"><Description dt:dt="string">E-Prime Primary Realtime Clock</Description><StartTime><Timestamp dt:dt="int">0</Timestamp><DateUtc dt:dt="string">2021-12-20T08:40:27Z</DateUtc></StartTime><FrequencyChanges><FrequencyChange><Frequency dt:dt="r8">10000000</Frequency><Timestamp dt:dt="r8">305379635201</Timestamp><Current dt:dt…	60.005	1.0.0.33	1	438939341	2.0.10.182	12-20-2021	2021-12-20 08:40:27	16:40:27	2.0.10.92	1	affpro	WordList	1	1	1	67	f	NULL	NULL	NULL	NULL	NULL	NULL	1	NULL	NULL	NULL	NULL	NULL	NULL	NULL	NULL	pra2	taskList1	转基因食物+科学的	NULL	NULL	NULL	NULL	NULL	NULL	NULL	NULL	NULL	1	f
大创GO-NOGO	1	2	<?xml version="1.0"?>\n<Clock xmlns:dt="urn:schemas-microsoft-com:datatypes"><Description dt:dt="string">E-Prime Primary Realtime Clock</Description><StartTime><Timestamp dt:dt="int">0</Timestamp><DateUtc dt:dt="string">2021-12-20T08:40:27Z</DateUtc></StartTime><FrequencyChanges><FrequencyChange><Frequency dt:dt="r8">10000000</Frequency><Timestamp dt:dt="r8">305379635201</Timestamp><Current dt:dt…	60.005	1.0.0.33	1	438939341	2.0.10.182	12-20-2021	2021-12-20 08:40:27	16:40:27	2.0.10.92	1	affpro	WordList	1	1	1	68	f	NULL	NULL	NULL	NULL	NULL	NULL	6	NULL	NULL	NULL	NULL	NULL	NULL	NULL	NULL	pra2	taskList1	抗虫害棉花+高产的	NULL	NULL	NULL	NULL	NULL	NULL	NULL	NULL	NULL	1	f
大创GO-NOGO	1	2	<?xml version="1.0"?>\n<Clock xmlns:dt="urn:schemas-microsoft-com:datatypes"><Description dt:dt="string">E-Prime Primary Realtime Clock</Description><StartTime><Timestamp dt:dt="int">0</Timestamp><DateUtc dt:dt="string">2021-12-20T08:40:27Z</DateUtc></StartTime><FrequencyChanges><FrequencyChange><Frequency dt:dt="r8">10000000</Frequency><Timestamp dt:dt="r8">305379635201</Timestamp><Current dt:dt…	60.005	1.0.0.33	1	438939341	2.0.10.182	12-20-2021	2021-12-20 08:40:27	16:40:27	2.0.10.92	1	affpro	WordList	1	1	1	69	f	NULL	NULL	NULL	NULL	NULL	NULL	15	NULL	NULL	NULL	NULL	NULL	NULL	NULL	NULL	pra2	taskList1	动物转基因+高科技的	NULL	NULL	NULL	NULL	NULL	NULL	NULL	NULL	NULL	1	f
大创GO-NOGO	1	2	<?xml version="1.0"?>\n<Clock xmlns:dt="urn:schemas-microsoft-com:datatypes"><Description dt:dt="string">E-Prime Primary Realtime Clock</Description><StartTime><Timestamp dt:dt="int">0</Timestamp><DateUtc dt:dt="string">2021-12-20T08:40:27Z</DateUtc></StartTime><FrequencyChanges><FrequencyChange><Frequency dt:dt="r8">10000000</Frequency><Timestamp dt:dt="r8">305379635201</Timestamp><Current dt:dt…	60.005	1.0.0.33	1	438939341	2.0.10.182	12-20-2021	2021-12-20 08:40:27	16:40:27	2.0.10.92	1	affpro	WordList	1	1	1	70		NULL	NULL	10	NULL	NULL	NULL	NULL	NULL	NULL	NULL	NULL	NULL	NULL	NULL	NULL	pra2	taskList1	转基因大豆+高风险的	NULL	NULL	NULL	NULL	NULL	NULL	NULL	NULL	NULL	1
大创GO-NOGO	1	2	<?xml version="1.0"?>\n<Clock xmlns:dt="urn:schemas-microsoft-com:datatypes"><Description dt:dt="string">E-Prime Primary Realtime Clock</Description><StartTime><Timestamp dt:dt="int">0</Timestamp><DateUtc dt:dt="string">2021-12-20T08:40:27Z</DateUtc></StartTime><FrequencyChanges><FrequencyChange><Frequency dt:dt="r8">10000000</Frequency><Timestamp dt:dt="r8">305379635201</Timestamp><Current dt:dt…	60.005	1.0.0.33	1	438939341	2.0.10.182	12-20-2021	2021-12-20 08:40:27	16:40:27	2.0.10.92	1	affpro	WordList	1	1	1	71		NULL	NULL	1	NULL	NULL	NULL	NULL	NULL	NULL	NULL	NULL	NULL	NULL	NULL	NULL	pra2	taskList1	转基因食物+不成熟的	NULL	NULL	NULL	NULL	NULL	NULL	NULL	NULL	NULL	1
大创GO-NOGO	1	2	<?xml version="1.0"?>\n<Clock xmlns:dt="urn:schemas-microsoft-com:datatypes"><Description dt:dt="string">E-Prime Primary Realtime Clock</Description><StartTime><Timestamp dt:dt="int">0</Timestamp><DateUtc dt:dt="string">2021-12-20T08:40:27Z</DateUtc></StartTime><FrequencyChanges><FrequencyChange><Frequency dt:dt="r8">10000000</Frequency><Timestamp dt:dt="r8">305379635201</Timestamp><Current dt:dt…	60.005	1.0.0.33	1	438939341	2.0.10.182	12-20-2021	2021-12-20 08:40:27	16:40:27	2.0.10.92	1	affpro	WordList	1	1	1	72		NULL	NULL	13	NULL	NULL	NULL	NULL	NULL	NULL	NULL	NULL	NULL	NULL	NULL	NULL	pra2	taskList1	动物转基因+不成熟的	NULL	NULL	NULL	NULL	NULL	NULL	NULL	NULL	NULL	1
大创GO-NOGO	1	2	<?xml version="1.0"?>\n<Clock xmlns:dt="urn:schemas-microsoft-com:datatypes"><Description dt:dt="string">E-Prime Primary Realtime Clock</Description><StartTime><Timestamp dt:dt="int">0</Timestamp><DateUtc dt:dt="string">2021-12-20T08:40:27Z</DateUtc></StartTime><FrequencyChanges><FrequencyChange><Frequency dt:dt="r8">10000000</Frequency><Timestamp dt:dt="r8">305379635201</Timestamp><Current dt:dt…	60.005	1.0.0.33	1	438939341	2.0.10.182	12-20-2021	2021-12-20 08:40:27	16:40:27	2.0.10.92	1	affpro	WordList	1	1	1	73		NULL	NULL	14	NULL	NULL	NULL	NULL	NULL	NULL	NULL	NULL	NULL	NULL	NULL	NULL	pra2	taskList1	动物转基因+高风险的	NULL	NULL	NULL	NULL	NULL	NULL	NULL	NULL	NULL	0
大创GO-NOGO	1	2	<?xml version="1.0"?>\n<Clock xmlns:dt="urn:schemas-microsoft-com:datatypes"><Description dt:dt="string">E-Prime Primary Realtime Clock</Description><StartTime><Timestamp dt:dt="int">0</Timestamp><DateUtc dt:dt="string">2021-12-20T08:40:27Z</DateUtc></StartTime><FrequencyChanges><FrequencyChange><Frequency dt:dt="r8">10000000</Frequency><Timestamp dt:dt="r8">305379635201</Timestamp><Current dt:dt…	60.005	1.0.0.33	1	438939341	2.0.10.182	12-20-2021	2021-12-20 08:40:27	16:40:27	2.0.10.92	1	affpro	WordList	1	1	1	74		NULL	NULL	6	NULL	NULL	NULL	NULL	NULL	NULL	NULL	NULL	NULL	NULL	NULL	NULL	pra2	taskList1	抗虫害棉花+高风险的	NULL	NULL	NULL	NULL	NULL	NULL	NULL	NULL	NULL	1
大创GO-NOGO	1	2	<?xml version="1.0"?>\n<Clock xmlns:dt="urn:schemas-microsoft-com:datatypes"><Description dt:dt="string">E-Prime Primary Realtime Clock</Description><StartTime><Timestamp dt:dt="int">0</Timestamp><DateUtc dt:dt="string">2021-12-20T08:40:27Z</DateUtc></StartTime><FrequencyChanges><FrequencyChange><Frequency dt:dt="r8">10000000</Frequency><Timestamp dt:dt="r8">305379635201</Timestamp><Current dt:dt…	60.005	1.0.0.33	1	438939341	2.0.10.182	12-20-2021	2021-12-20 08:40:27	16:40:27	2.0.10.92	1	affpro	WordList	1	1	1	75		NULL	NULL	4	NULL	NULL	NULL	NULL	NULL	NULL	NULL	NULL	NULL	NULL	NULL	NULL	pra2	taskList1	转基因食物+有争议的	NULL	NULL	NULL	NULL	NULL	NULL	NULL	NULL	NULL	1
大创GO-NOGO	1	2	<?xml version="1.0"?>\n<Clock xmlns:dt="urn:schemas-microsoft-com:datatypes"><Description dt:dt="string">E-Prime Primary Realtime Clock</Description><StartTime><Timestamp dt:dt="int">0</Timestamp><DateUtc dt:dt="string">2021-12-20T08:40:27Z</DateUtc></StartTime><FrequencyChanges><FrequencyChange><Frequency dt:dt="r8">10000000</Frequency><Timestamp dt:dt="r8">305379635201</Timestamp><Current dt:dt…	60.005	1.0.0.33	1	438939341	2.0.10.182	12-20-2021	2021-12-20 08:40:27	16:40:27	2.0.10.92	1	affpro	WordList	1	1	1	76		NULL	NULL	9	NULL	NULL	NULL	NULL	NULL	NULL	NULL	NULL	NULL	NULL	NULL	NULL	pra2	taskList1	转基因大豆+不成熟的	NULL	NULL	NULL	NULL	NULL	NULL	NULL	NULL	NULL	1
大创GO-NOGO	1	2	<?xml version="1.0"?>\n<Clock xmlns:dt="urn:schemas-microsoft-com:datatypes"><Description dt:dt="string">E-Prime Primary Realtime Clock</Description><StartTime><Timestamp dt:dt="int">0</Timestamp><DateUtc dt:dt="string">2021-12-20T08:40:27Z</DateUtc></StartTime><FrequencyChanges><FrequencyChange><Frequency dt:dt="r8">10000000</Frequency><Timestamp dt:dt="r8">305379635201</Timestamp><Current dt:dt…	60.005	1.0.0.33	1	438939341	2.0.10.182	12-20-2021	2021-12-20 08:40:27	16:40:27	2.0.10.92	1	affpro	WordList	1	1	1	77	f	NULL	NULL	NULL	NULL	NULL	NULL	11	NULL	NULL	NULL	NULL	NULL	NULL	NULL	NULL	pra2	taskList1	转基因大豆+高科技的	NULL	NULL	NULL	NULL	NULL	NULL	NULL	NULL	NULL	1	f
大创GO-NOGO	1	2	<?xml version="1.0"?>\n<Clock xmlns:dt="urn:schemas-microsoft-com:datatypes"><Description dt:dt="string">E-Prime Primary Realtime Clock</Description><StartTime><Timestamp dt:dt="int">0</Timestamp><DateUtc dt:dt="string">2021-12-20T08:40:27Z</DateUtc></StartTime><FrequencyChanges><FrequencyChange><Frequency dt:dt="r8">10000000</Frequency><Timestamp dt:dt="r8">305379635201</Timestamp><Current dt:dt…	60.005	1.0.0.33	1	438939341	2.0.10.182	12-20-2021	2021-12-20 08:40:27	16:40:27	2.0.10.92	1	affpro	WordList	1	1	1	78		NULL	NULL	15	NULL	NULL	NULL	NULL	NULL	NULL	NULL	NULL	NULL	NULL	NULL	NULL	pra2	taskList1	动物转基因+非天然的	NULL	NULL	NULL	NULL	NULL	NULL	NULL	NULL	NULL	1
大创GO-NOGO	1	2	<?xml version="1.0"?>\n<Clock xmlns:dt="urn:schemas-microsoft-com:datatypes"><Description dt:dt="string">E-Prime Primary Realtime Clock</Description><StartTime><Timestamp dt:dt="int">0</Timestamp><DateUtc dt:dt="string">2021-12-20T08:40:27Z</DateUtc></StartTime><FrequencyChanges><FrequencyChange><Frequency dt:dt="r8">10000000</Frequency><Timestamp dt:dt="r8">305379635201</Timestamp><Current dt:dt…	60.005	1.0.0.33	1	438939341	2.0.10.182	12-20-2021	2021-12-20 08:40:27	16:40:27	2.0.10.92	1	affpro	WordList	1	1	1	79		NULL	NULL	10	NULL	NULL	NULL	NULL	NULL	NULL	NULL	NULL	NULL	NULL	NULL	NULL	pra2	taskList1	转基因大豆+高风险的	NULL	NULL	NULL	NULL	NULL	NULL	NULL	NULL	NULL	1
大创GO-NOGO	1	2	<?xml version="1.0"?>\n<Clock xmlns:dt="urn:schemas-microsoft-com:datatypes"><Description dt:dt="string">E-Prime Primary Realtime Clock</Description><StartTime><Timestamp dt:dt="int">0</Timestamp><DateUtc dt:dt="string">2021-12-20T08:40:27Z</DateUtc></StartTime><FrequencyChanges><FrequencyChange><Frequency dt:dt="r8">10000000</Frequency><Timestamp dt:dt="r8">305379635201</Timestamp><Current dt:dt…	60.005	1.0.0.33	1	438939341	2.0.10.182	12-20-2021	2021-12-20 08:40:27	16:40:27	2.0.10.92	1	affpro	WordList	1	1	1	80		NULL	NULL	8	NULL	NULL	NULL	NULL	NULL	NULL	NULL	NULL	NULL	NULL	NULL	NULL	pra2	taskList1	抗虫害棉花+有争议的	NULL	NULL	NULL	NULL	NULL	NULL	NULL	NULL	NULL	1
大创GO-NOGO	1	2	<?xml version="1.0"?>\n<Clock xmlns:dt="urn:schemas-microsoft-com:datatypes"><Description dt:dt="string">E-Prime Primary Realtime Clock</Description><StartTime><Timestamp dt:dt="int">0</Timestamp><DateUtc dt:dt="string">2021-12-20T08:40:27Z</DateUtc></StartTime><FrequencyChanges><FrequencyChange><Frequency dt:dt="r8">10000000</Frequency><Timestamp dt:dt="r8">305379635201</Timestamp><Current dt:dt…	60.005	1.0.0.33	1	438939341	2.0.10.182	12-20-2021	2021-12-20 08:40:27	16:40:27	2.0.10.92	1	affpro	WordList	1	1	1	81	f	NULL	NULL	NULL	NULL	NULL	NULL	2	NULL	NULL	NULL	NULL	NULL	NULL	NULL	NULL	pra2	taskList1	转基因食物+高产的	NULL	NULL	NULL	NULL	NULL	NULL	NULL	NULL	NULL	1	f
大创GO-NOGO	1	2	<?xml version="1.0"?>\n<Clock xmlns:dt="urn:schemas-microsoft-com:datatypes"><Description dt:dt="string">E-Prime Primary Realtime Clock</Description><StartTime><Timestamp dt:dt="int">0</Timestamp><DateUtc dt:dt="string">2021-12-20T08:40:27Z</DateUtc></StartTime><FrequencyChanges><FrequencyChange><Frequency dt:dt="r8">10000000</Frequency><Timestamp dt:dt="r8">305379635201</Timestamp><Current dt:dt…	60.005	1.0.0.33	1	438939341	2.0.10.182	12-20-2021	2021-12-20 08:40:27	16:40:27	2.0.10.92	1	affpro	WordList	1	1	1	82		NULL	NULL	13	NULL	NULL	NULL	NULL	NULL	NULL	NULL	NULL	NULL	NULL	NULL	NULL	pra2	taskList1	动物转基因+不成熟的	NULL	NULL	NULL	NULL	NULL	NULL	NULL	NULL	NULL	1
大创GO-NOGO	1	2	<?xml version="1.0"?>\n<Clock xmlns:dt="urn:schemas-microsoft-com:datatypes"><Description dt:dt="string">E-Prime Primary Realtime Clock</Description><StartTime><Timestamp dt:dt="int">0</Timestamp><DateUtc dt:dt="string">2021-12-20T08:40:27Z</DateUtc></StartTime><FrequencyChanges><FrequencyChange><Frequency dt:dt="r8">10000000</Frequency><Timestamp dt:dt="r8">305379635201</Timestamp><Current dt:dt…	60.005	1.0.0.33	1	438939341	2.0.10.182	12-20-2021	2021-12-20 08:40:27	16:40:27	2.0.10.92	1	affpro	WordList	1	1	1	83	f	NULL	NULL	NULL	NULL	NULL	NULL	5	NULL	NULL	NULL	NULL	NULL	NULL	NULL	NULL	pra2	taskList1	抗虫害棉花+科学的	NULL	NULL	NULL	NULL	NULL	NULL	NULL	NULL	NULL	1	f
大创GO-NOGO	1	2	<?xml version="1.0"?>\n<Clock xmlns:dt="urn:schemas-microsoft-com:datatypes"><Description dt:dt="string">E-Prime Primary Realtime Clock</Description><StartTime><Timestamp dt:dt="int">0</Timestamp><DateUtc dt:dt="string">2021-12-20T08:40:27Z</DateUtc></StartTime><FrequencyChanges><FrequencyChange><Frequency dt:dt="r8">10000000</Frequency><Timestamp dt:dt="r8">305379635201</Timestamp><Current dt:dt…	60.005	1.0.0.33	1	438939341	2.0.10.182	12-20-2021	2021-12-20 08:40:27	16:40:27	2.0.10.92	1	affpro	WordList	1	1	1	84		NULL	NULL	4	NULL	NULL	NULL	NULL	NULL	NULL	NULL	NULL	NULL	NULL	NULL	NULL	pra2	taskList1	转基因食物+有争议的	NULL	NULL	NULL	NULL	NULL	NULL	NULL	NULL	NULL	1
大创GO-NOGO	1	2	<?xml version="1.0"?>\n<Clock xmlns:dt="urn:schemas-microsoft-com:datatypes"><Description dt:dt="string">E-Prime Primary Realtime Clock</Description><StartTime><Timestamp dt:dt="int">0</Timestamp><DateUtc dt:dt="string">2021-12-20T08:40:27Z</DateUtc></StartTime><FrequencyChanges><FrequencyChange><Frequency dt:dt="r8">10000000</Frequency><Timestamp dt:dt="r8">305379635201</Timestamp><Current dt:dt…	60.005	1.0.0.33	1	438939341	2.0.10.182	12-20-2021	2021-12-20 08:40:27	16:40:27	2.0.10.92	1	affpro	WordList	1	1	1	85	f	NULL	NULL	NULL	NULL	NULL	NULL	8	NULL	NULL	NULL	NULL	NULL	NULL	NULL	NULL	pra2	taskList1	抗虫害棉花+创新的	NULL	NULL	NULL	NULL	NULL	NULL	NULL	NULL	NULL	1	f
大创GO-NOGO	1	2	<?xml version="1.0"?>\n<Clock xmlns:dt="urn:schemas-microsoft-com:datatypes"><Description dt:dt="string">E-Prime Primary Realtime Clock</Description><StartTime><Timestamp dt:dt="int">0</Timestamp><DateUtc dt:dt="string">2021-12-20T08:40:27Z</DateUtc></StartTime><FrequencyChanges><FrequencyChange><Frequency dt:dt="r8">10000000</Frequency><Timestamp dt:dt="r8">305379635201</Timestamp><Current dt:dt…	60.005	1.0.0.33	1	438939341	2.0.10.182	12-20-2021	2021-12-20 08:40:27	16:40:27	2.0.10.92	1	affpro	WordList	1	1	1	86		NULL	NULL	11	NULL	NULL	NULL	NULL	NULL	NULL	NULL	NULL	NULL	NULL	NULL	NULL	pra2	taskList1	转基因大豆+非天然的	NULL	NULL	NULL	NULL	NULL	NULL	NULL	NULL	NULL	1
大创GO-NOGO	1	2	<?xml version="1.0"?>\n<Clock xmlns:dt="urn:schemas-microsoft-com:datatypes"><Description dt:dt="string">E-Prime Primary Realtime Clock</Description><StartTime><Timestamp dt:dt="int">0</Timestamp><DateUtc dt:dt="string">2021-12-20T08:40:27Z</DateUtc></StartTime><FrequencyChanges><FrequencyChange><Frequency dt:dt="r8">10000000</Frequency><Timestamp dt:dt="r8">305379635201</Timestamp><Current dt:dt…	60.005	1.0.0.33	1	438939341	2.0.10.182	12-20-2021	2021-12-20 08:40:27	16:40:27	2.0.10.92	1	affpro	WordList	1	1	1	87	f	NULL	NULL	NULL	NULL	NULL	NULL	10	NULL	NULL	NULL	NULL	NULL	NULL	NULL	NULL	pra2	taskList1	转基因大豆+高产的	NULL	NULL	NULL	NULL	NULL	NULL	NULL	NULL	NULL	1	f
大创GO-NOGO	1	2	<?xml version="1.0"?>\n<Clock xmlns:dt="urn:schemas-microsoft-com:datatypes"><Description dt:dt="string">E-Prime Primary Realtime Clock</Description><StartTime><Timestamp dt:dt="int">0</Timestamp><DateUtc dt:dt="string">2021-12-20T08:40:27Z</DateUtc></StartTime><FrequencyChanges><FrequencyChange><Frequency dt:dt="r8">10000000</Frequency><Timestamp dt:dt="r8">305379635201</Timestamp><Current dt:dt…	60.005	1.0.0.33	1	438939341	2.0.10.182	12-20-2021	2021-12-20 08:40:27	16:40:27	2.0.10.92	1	affpro	WordList	1	1	1	88	f	NULL	NULL	NULL	NULL	NULL	NULL	16	NULL	NULL	NULL	NULL	NULL	NULL	NULL	NULL	pra2	taskList1	动物转基因+创新的	NULL	NULL	NULL	NULL	NULL	NULL	NULL	NULL	NULL	1	f
大创GO-NOGO	1	2	<?xml version="1.0"?>\n<Clock xmlns:dt="urn:schemas-microsoft-com:datatypes"><Description dt:dt="string">E-Prime Primary Realtime Clock</Description><StartTime><Timestamp dt:dt="int">0</Timestamp><DateUtc dt:dt="string">2021-12-20T08:40:27Z</DateUtc></StartTime><FrequencyChanges><FrequencyChange><Frequency dt:dt="r8">10000000</Frequency><Timestamp dt:dt="r8">305379635201</Timestamp><Current dt:dt…	60.005	1.0.0.33	1	438939341	2.0.10.182	12-20-2021	2021-12-20 08:40:27	16:40:27	2.0.10.92	1	affpro	WordList	1	1	1	89		NULL	NULL	16	NULL	NULL	NULL	NULL	NULL	NULL	NULL	NULL	NULL	NULL	NULL	NULL	pra2	taskList1	动物转基因+有争议的	NULL	NULL	NULL	NULL	NULL	NULL	NULL	NULL	NULL	1
大创GO-NOGO	1	2	<?xml version="1.0"?>\n<Clock xmlns:dt="urn:schemas-microsoft-com:datatypes"><Description dt:dt="string">E-Prime Primary Realtime Clock</Description><StartTime><Timestamp dt:dt="int">0</Timestamp><DateUtc dt:dt="string">2021-12-20T08:40:27Z</DateUtc></StartTime><FrequencyChanges><FrequencyChange><Frequency dt:dt="r8">10000000</Frequency><Timestamp dt:dt="r8">305379635201</Timestamp><Current dt:dt…	60.005	1.0.0.33	1	438939341	2.0.10.182	12-20-2021	2021-12-20 08:40:27	16:40:27	2.0.10.92	1	affpro	WordList	1	1	1	90		NULL	NULL	5	NULL	NULL	NULL	NULL	NULL	NULL	NULL	NULL	NULL	NULL	NULL	NULL	pra2	taskList1	抗虫害棉花+不成熟的	NULL	NULL	NULL	NULL	NULL	NULL	NULL	NULL	NULL	1
大创GO-NOGO	1	2	<?xml version="1.0"?>\n<Clock xmlns:dt="urn:schemas-microsoft-com:datatypes"><Description dt:dt="string">E-Prime Primary Realtime Clock</Description><StartTime><Timestamp dt:dt="int">0</Timestamp><DateUtc dt:dt="string">2021-12-20T08:40:27Z</DateUtc></StartTime><FrequencyChanges><FrequencyChange><Frequency dt:dt="r8">10000000</Frequency><Timestamp dt:dt="r8">305379635201</Timestamp><Current dt:dt…	60.005	1.0.0.33	1	438939341	2.0.10.182	12-20-2021	2021-12-20 08:40:27	16:40:27	2.0.10.92	1	affpro	WordList	1	1	1	91		NULL	NULL	2	NULL	NULL	NULL	NULL	NULL	NULL	NULL	NULL	NULL	NULL	NULL	NULL	pra2	taskList1	转基因食物+高风险的	NULL	NULL	NULL	NULL	NULL	NULL	NULL	NULL	NULL	1
大创GO-NOGO	1	2	<?xml version="1.0"?>\n<Clock xmlns:dt="urn:schemas-microsoft-com:datatypes"><Description dt:dt="string">E-Prime Primary Realtime Clock</Description><StartTime><Timestamp dt:dt="int">0</Timestamp><DateUtc dt:dt="string">2021-12-20T08:40:27Z</DateUtc></StartTime><FrequencyChanges><FrequencyChange><Frequency dt:dt="r8">10000000</Frequency><Timestamp dt:dt="r8">305379635201</Timestamp><Current dt:dt…	60.005	1.0.0.33	1	438939341	2.0.10.182	12-20-2021	2021-12-20 08:40:27	16:40:27	2.0.10.92	1	affpro	WordList	1	1	1	92	f	NULL	NULL	NULL	NULL	NULL	NULL	13	NULL	NULL	NULL	NULL	NULL	NULL	NULL	NULL	pra2	taskList1	动物转基因+科学的	NULL	NULL	NULL	NULL	NULL	NULL	NULL	NULL	NULL	1	f
大创GO-NOGO	1	2	<?xml version="1.0"?>\n<Clock xmlns:dt="urn:schemas-microsoft-com:datatypes"><Description dt:dt="string">E-Prime Primary Realtime Clock</Description><StartTime><Timestamp dt:dt="int">0</Timestamp><DateUtc dt:dt="string">2021-12-20T08:40:27Z</DateUtc></StartTime><FrequencyChanges><FrequencyChange><Frequency dt:dt="r8">10000000</Frequency><Timestamp dt:dt="r8">305379635201</Timestamp><Current dt:dt…	60.005	1.0.0.33	1	438939341	2.0.10.182	12-20-2021	2021-12-20 08:40:27	16:40:27	2.0.10.92	1	affpro	WordList	1	1	1	93	f	NULL	NULL	NULL	NULL	NULL	NULL	9	NULL	NULL	NULL	NULL	NULL	NULL	NULL	NULL	pra2	taskList1	转基因大豆+科学的	NULL	NULL	NULL	NULL	NULL	NULL	NULL	NULL	NULL	1	f
大创GO-NOGO	1	2	<?xml version="1.0"?>\n<Clock xmlns:dt="urn:schemas-microsoft-com:datatypes"><Description dt:dt="string">E-Prime Primary Realtime Clock</Description><StartTime><Timestamp dt:dt="int">0</Timestamp><DateUtc dt:dt="string">2021-12-20T08:40:27Z</DateUtc></StartTime><FrequencyChanges><FrequencyChange><Frequency dt:dt="r8">10000000</Frequency><Timestamp dt:dt="r8">305379635201</Timestamp><Current dt:dt…	60.005	1.0.0.33	1	438939341	2.0.10.182	12-20-2021	2021-12-20 08:40:27	16:40:27	2.0.10.92	1	affpro	WordList	1	1	1	94	f	NULL	NULL	NULL	NULL	NULL	NULL	3	NULL	NULL	NULL	NULL	NULL	NULL	NULL	NULL	pra2	taskList1	转基因食物+高科技的	NULL	NULL	NULL	NULL	NULL	NULL	NULL	NULL	NULL	1	f
大创GO-NOGO	1	2	<?xml version="1.0"?>\n<Clock xmlns:dt="urn:schemas-microsoft-com:datatypes"><Description dt:dt="string">E-Prime Primary Realtime Clock</Description><StartTime><Timestamp dt:dt="int">0</Timestamp><DateUtc dt:dt="string">2021-12-20T08:40:27Z</DateUtc></StartTime><FrequencyChanges><FrequencyChange><Frequency dt:dt="r8">10000000</Frequency><Timestamp dt:dt="r8">305379635201</Timestamp><Current dt:dt…	60.005	1.0.0.33	1	438939341	2.0.10.182	12-20-2021	2021-12-20 08:40:27	16:40:27	2.0.10.92	1	affpro	WordList	1	1	1	95		NULL	NULL	14	NULL	NULL	NULL	NULL	NULL	NULL	NULL	NULL	NULL	NULL	NULL	NULL	pra2	taskList1	动物转基因+高风险的	NULL	NULL	NULL	NULL	NULL	NULL	NULL	NULL	NULL	0
大创GO-NOGO	1	2	<?xml version="1.0"?>\n<Clock xmlns:dt="urn:schemas-microsoft-com:datatypes"><Description dt:dt="string">E-Prime Primary Realtime Clock</Description><StartTime><Timestamp dt:dt="int">0</Timestamp><DateUtc dt:dt="string">2021-12-20T08:40:27Z</DateUtc></StartTime><FrequencyChanges><FrequencyChange><Frequency dt:dt="r8">10000000</Frequency><Timestamp dt:dt="r8">305379635201</Timestamp><Current dt:dt…	60.005	1.0.0.33	1	438939341	2.0.10.182	12-20-2021	2021-12-20 08:40:27	16:40:27	2.0.10.92	1	affpro	WordList	1	1	1	96	f	NULL	NULL	NULL	NULL	NULL	NULL	4	NULL	NULL	NULL	NULL	NULL	NULL	NULL	NULL	pra2	taskList1	转基因食物+创新的	NULL	NULL	NULL	NULL	NULL	NULL	NULL	NULL	NULL	1	f
大创GO-NOGO	1	2	<?xml version="1.0"?>\n<Clock xmlns:dt="urn:schemas-microsoft-com:datatypes"><Description dt:dt="string">E-Prime Primary Realtime Clock</Description><StartTime><Timestamp dt:dt="int">0</Timestamp><DateUtc dt:dt="string">2021-12-20T08:40:27Z</DateUtc></StartTime><FrequencyChanges><FrequencyChange><Frequency dt:dt="r8">10000000</Frequency><Timestamp dt:dt="r8">305379635201</Timestamp><Current dt:dt…	60.005	1.0.0.33	1	438939341	2.0.10.182	12-20-2021	2021-12-20 08:40:27	16:40:27	2.0.10.92	1	affpro	WordList	1	1	1	97	NULL		NULL	NULL	NULL	NULL	NULL	NULL	9	NULL	NULL	NULL	NULL	1	1	1	pra3	practiceList2	转基因大豆+科学的	NULL	NULL	NULL	NULL	NULL	NULL	NULL	NULL	NULL	NULL	NULL
大创GO-NOGO	1	2	<?xml version="1.0"?>\n<Clock xmlns:dt="urn:schemas-microsoft-com:datatypes"><Description dt:dt="string">E-Prime Primary Realtime Clock</Description><StartTime><Timestamp dt:dt="int">0</Timestamp><DateUtc dt:dt="string">2021-12-20T08:40:27Z</DateUtc></StartTime><FrequencyChanges><FrequencyChange><Frequency dt:dt="r8">10000000</Frequency><Timestamp dt:dt="r8">305379635201</Timestamp><Current dt:dt…	60.005	1.0.0.33	1	438939341	2.0.10.182	12-20-2021	2021-12-20 08:40:27	16:40:27	2.0.10.92	1	affpro	WordList	1	1	1	98	NULL	j	NULL	NULL	5	NULL	NULL	NULL	NULL	NULL	NULL	NULL	NULL	2	2	2	pra3	practiceList2	抗虫害棉花+不成熟的	NULL	NULL	NULL	NULL	NULL	NULL	NULL	NULL	NULL	NULL	NULL
大创GO-NOGO	1	2	<?xml version="1.0"?>\n<Clock xmlns:dt="urn:schemas-microsoft-com:datatypes"><Description dt:dt="string">E-Prime Primary Realtime Clock</Description><StartTime><Timestamp dt:dt="int">0</Timestamp><DateUtc dt:dt="string">2021-12-20T08:40:27Z</DateUtc></StartTime><FrequencyChanges><FrequencyChange><Frequency dt:dt="r8">10000000</Frequency><Timestamp dt:dt="r8">305379635201</Timestamp><Current dt:dt…	60.005	1.0.0.33	1	438939341	2.0.10.182	12-20-2021	2021-12-20 08:40:27	16:40:27	2.0.10.92	1	affpro	WordList	1	1	1	99	NULL		NULL	NULL	NULL	NULL	NULL	NULL	7	NULL	NULL	NULL	NULL	1	3	3	pra3	practiceList2	抗虫害棉花+高科技的	NULL	NULL	NULL	NULL	NULL	NULL	NULL	NULL	NULL	NULL	NULL
大创GO-NOGO	1	2	<?xml version="1.0"?>\n<Clock xmlns:dt="urn:schemas-microsoft-com:datatypes"><Description dt:dt="string">E-Prime Primary Realtime Clock</Description><StartTime><Timestamp dt:dt="int">0</Timestamp><DateUtc dt:dt="string">2021-12-20T08:40:27Z</DateUtc></StartTime><FrequencyChanges><FrequencyChange><Frequency dt:dt="r8">10000000</Frequency><Timestamp dt:dt="r8">305379635201</Timestamp><Current dt:dt…	60.005	1.0.0.33	1	438939341	2.0.10.182	12-20-2021	2021-12-20 08:40:27	16:40:27	2.0.10.92	1	affpro	WordList	1	1	1	100	NULL	j	NULL	NULL	12	NULL	NULL	NULL	NULL	NULL	NULL	NULL	NULL	2	4	4	pra3	practiceList2	转基因大豆+有争议的	NULL	NULL	NULL	NULL	NULL	NULL	NULL	NULL	NULL	NULL	NULL
大创GO-NOGO	1	2	<?xml version="1.0"?>\n<Clock xmlns:dt="urn:schemas-microsoft-com:datatypes"><Description dt:dt="string">E-Prime Primary Realtime Clock</Description><StartTime><Timestamp dt:dt="int">0</Timestamp><DateUtc dt:dt="string">2021-12-20T08:40:27Z</DateUtc></StartTime><FrequencyChanges><FrequencyChange><Frequency dt:dt="r8">10000000</Frequency><Timestamp dt:dt="r8">305379635201</Timestamp><Current dt:dt…	60.005	1.0.0.33	1	438939341	2.0.10.182	12-20-2021	2021-12-20 08:40:27	16:40:27	2.0.10.92	1	affpro	WordList	1	1	1	101	NULL	j	NULL	NULL	14	NULL	NULL	NULL	NULL	NULL	NULL	NULL	NULL	2	5	5	pra3	practiceList2	动物转基因+高风险的	NULL	NULL	NULL	NULL	NULL	NULL	NULL	NULL	NULL	NULL	NULL
大创GO-NOGO	1	2	<?xml version="1.0"?>\n<Clock xmlns:dt="urn:schemas-microsoft-com:datatypes"><Description dt:dt="string">E-Prime Primary Realtime Clock</Description><StartTime><Timestamp dt:dt="int">0</Timestamp><DateUtc dt:dt="string">2021-12-20T08:40:27Z</DateUtc></StartTime><FrequencyChanges><FrequencyChange><Frequency dt:dt="r8">10000000</Frequency><Timestamp dt:dt="r8">305379635201</Timestamp><Current dt:dt…	60.005	1.0.0.33	1	438939341	2.0.10.182	12-20-2021	2021-12-20 08:40:27	16:40:27	2.0.10.92	1	affpro	WordList	1	1	1	102	NULL		NULL	NULL	NULL	NULL	NULL	NULL	6	NULL	NULL	NULL	NULL	1	6	6	pra3	practiceList2	抗虫害棉花+高产的	NULL	NULL	NULL	NULL	NULL	NULL	NULL	NULL	NULL	NULL	NULL
大创GO-NOGO	1	2	<?xml version="1.0"?>\n<Clock xmlns:dt="urn:schemas-microsoft-com:datatypes"><Description dt:dt="string">E-Prime Primary Realtime Clock</Description><StartTime><Timestamp dt:dt="int">0</Timestamp><DateUtc dt:dt="string">2021-12-20T08:40:27Z</DateUtc></StartTime><FrequencyChanges><FrequencyChange><Frequency dt:dt="r8">10000000</Frequency><Timestamp dt:dt="r8">305379635201</Timestamp><Current dt:dt…	60.005	1.0.0.33	1	438939341	2.0.10.182	12-20-2021	2021-12-20 08:40:27	16:40:27	2.0.10.92	1	affpro	WordList	1	1	1	103	NULL		NULL	NULL	NULL	NULL	NULL	NULL	1	NULL	NULL	NULL	NULL	1	7	7	pra3	practiceList2	转基因食物+科学的	NULL	NULL	NULL	NULL	NULL	NULL	NULL	NULL	NULL	NULL	NULL
大创GO-NOGO	1	2	<?xml version="1.0"?>\n<Clock xmlns:dt="urn:schemas-microsoft-com:datatypes"><Description dt:dt="string">E-Prime Primary Realtime Clock</Description><StartTime><Timestamp dt:dt="int">0</Timestamp><DateUtc dt:dt="string">2021-12-20T08:40:27Z</DateUtc></StartTime><FrequencyChanges><FrequencyChange><Frequency dt:dt="r8">10000000</Frequency><Timestamp dt:dt="r8">305379635201</Timestamp><Current dt:dt…	60.005	1.0.0.33	1	438939341	2.0.10.182	12-20-2021	2021-12-20 08:40:27	16:40:27	2.0.10.92	1	affpro	WordList	1	1	1	104	NULL		NULL	NULL	NULL	NULL	NULL	NULL	14	NULL	NULL	NULL	NULL	1	8	8	pra3	practiceList2	动物转基因+高产的	NULL	NULL	NULL	NULL	NULL	NULL	NULL	NULL	NULL	NULL	NULL
大创GO-NOGO	1	2	<?xml version="1.0"?>\n<Clock xmlns:dt="urn:schemas-microsoft-com:datatypes"><Description dt:dt="string">E-Prime Primary Realtime Clock</Description><StartTime><Timestamp dt:dt="int">0</Timestamp><DateUtc dt:dt="string">2021-12-20T08:40:27Z</DateUtc></StartTime><FrequencyChanges><FrequencyChange><Frequency dt:dt="r8">10000000</Frequency><Timestamp dt:dt="r8">305379635201</Timestamp><Current dt:dt…	60.005	1.0.0.33	1	438939341	2.0.10.182	12-20-2021	2021-12-20 08:40:27	16:40:27	2.0.10.92	1	affpro	WordList	1	1	1	105	NULL		NULL	NULL	NULL	NULL	NULL	NULL	16	NULL	NULL	NULL	NULL	1	9	9	pra3	practiceList2	动物转基因+创新的	NULL	NULL	NULL	NULL	NULL	NULL	NULL	NULL	NULL	NULL	NULL
大创GO-NOGO	1	2	<?xml version="1.0"?>\n<Clock xmlns:dt="urn:schemas-microsoft-com:datatypes"><Description dt:dt="string">E-Prime Primary Realtime Clock</Description><StartTime><Timestamp dt:dt="int">0</Timestamp><DateUtc dt:dt="string">2021-12-20T08:40:27Z</DateUtc></StartTime><FrequencyChanges><FrequencyChange><Frequency dt:dt="r8">10000000</Frequency><Timestamp dt:dt="r8">305379635201</Timestamp><Current dt:dt…	60.005	1.0.0.33	1	438939341	2.0.10.182	12-20-2021	2021-12-20 08:40:27	16:40:27	2.0.10.92	1	affpro	WordList	1	1	1	106	NULL		NULL	NULL	NULL	NULL	NULL	NULL	10	NULL	NULL	NULL	NULL	1	10	10	pra3	practiceList2	转基因大豆+高产的	NULL	NULL	NULL	NULL	NULL	NULL	NULL	NULL	NULL	NULL	NULL
大创GO-NOGO	1	2	<?xml version="1.0"?>\n<Clock xmlns:dt="urn:schemas-microsoft-com:datatypes"><Description dt:dt="string">E-Prime Primary Realtime Clock</Description><StartTime><Timestamp dt:dt="int">0</Timestamp><DateUtc dt:dt="string">2021-12-20T08:40:27Z</DateUtc></StartTime><FrequencyChanges><FrequencyChange><Frequency dt:dt="r8">10000000</Frequency><Timestamp dt:dt="r8">305379635201</Timestamp><Current dt:dt…	60.005	1.0.0.33	1	438939341	2.0.10.182	12-20-2021	2021-12-20 08:40:27	16:40:27	2.0.10.92	1	affpro	WordList	1	1	1	107	NULL	j	NULL	NULL	6	NULL	NULL	NULL	NULL	NULL	NULL	NULL	NULL	2	11	11	pra3	practiceList2	抗虫害棉花+高风险的	NULL	NULL	NULL	NULL	NULL	NULL	NULL	NULL	NULL	NULL	NULL
大创GO-NOGO	1	2	<?xml version="1.0"?>\n<Clock xmlns:dt="urn:schemas-microsoft-com:datatypes"><Description dt:dt="string">E-Prime Primary Realtime Clock</Description><StartTime><Timestamp dt:dt="int">0</Timestamp><DateUtc dt:dt="string">2021-12-20T08:40:27Z</DateUtc></StartTime><FrequencyChanges><FrequencyChange><Frequency dt:dt="r8">10000000</Frequency><Timestamp dt:dt="r8">305379635201</Timestamp><Current dt:dt…	60.005	1.0.0.33	1	438939341	2.0.10.182	12-20-2021	2021-12-20 08:40:27	16:40:27	2.0.10.92	1	affpro	WordList	1	1	1	108	NULL		NULL	NULL	NULL	NULL	NULL	NULL	4	NULL	NULL	NULL	NULL	1	12	12	pra3	practiceList2	转基因食物+创新的	NULL	NULL	NULL	NULL	NULL	NULL	NULL	NULL	NULL	NULL	NULL
大创GO-NOGO	1	2	<?xml version="1.0"?>\n<Clock xmlns:dt="urn:schemas-microsoft-com:datatypes"><Description dt:dt="string">E-Prime Primary Realtime Clock</Description><StartTime><Timestamp dt:dt="int">0</Timestamp><DateUtc dt:dt="string">2021-12-20T08:40:27Z</DateUtc></StartTime><FrequencyChanges><FrequencyChange><Frequency dt:dt="r8">10000000</Frequency><Timestamp dt:dt="r8">305379635201</Timestamp><Current dt:dt…	60.005	1.0.0.33	1	438939341	2.0.10.182	12-20-2021	2021-12-20 08:40:27	16:40:27	2.0.10.92	1	affpro	WordList	1	1	1	109	NULL		NULL	NULL	NULL	NULL	NULL	NULL	13	NULL	NULL	NULL	NULL	1	13	13	pra3	practiceList2	动物转基因+科学的	NULL	NULL	NULL	NULL	NULL	NULL	NULL	NULL	NULL	NULL	NULL
大创GO-NOGO	1	2	<?xml version="1.0"?>\n<Clock xmlns:dt="urn:schemas-microsoft-com:datatypes"><Description dt:dt="string">E-Prime Primary Realtime Clock</Description><StartTime><Timestamp dt:dt="int">0</Timestamp><DateUtc dt:dt="string">2021-12-20T08:40:27Z</DateUtc></StartTime><FrequencyChanges><FrequencyChange><Frequency dt:dt="r8">10000000</Frequency><Timestamp dt:dt="r8">305379635201</Timestamp><Current dt:dt…	60.005	1.0.0.33	1	438939341	2.0.10.182	12-20-2021	2021-12-20 08:40:27	16:40:27	2.0.10.92	1	affpro	WordList	1	1	1	110	NULL		NULL	NULL	NULL	NULL	NULL	NULL	15	NULL	NULL	NULL	NULL	1	14	14	pra3	practiceList2	动物转基因+高科技的	NULL	NULL	NULL	NULL	NULL	NULL	NULL	NULL	NULL	NULL	NULL
大创GO-NOGO	1	2	<?xml version="1.0"?>\n<Clock xmlns:dt="urn:schemas-microsoft-com:datatypes"><Description dt:dt="string">E-Prime Primary Realtime Clock</Description><StartTime><Timestamp dt:dt="int">0</Timestamp><DateUtc dt:dt="string">2021-12-20T08:40:27Z</DateUtc></StartTime><FrequencyChanges><FrequencyChange><Frequency dt:dt="r8">10000000</Frequency><Timestamp dt:dt="r8">305379635201</Timestamp><Current dt:dt…	60.005	1.0.0.33	1	438939341	2.0.10.182	12-20-2021	2021-12-20 08:40:27	16:40:27	2.0.10.92	1	affpro	WordList	1	1	1	111	NULL		NULL	NULL	NULL	NULL	NULL	NULL	2	NULL	NULL	NULL	NULL	1	15	15	pra3	practiceList2	转基因食物+高产的	NULL	NULL	NULL	NULL	NULL	NULL	NULL	NULL	NULL	NULL	NULL
大创GO-NOGO	1	2	<?xml version="1.0"?>\n<Clock xmlns:dt="urn:schemas-microsoft-com:datatypes"><Description dt:dt="string">E-Prime Primary Realtime Clock</Description><StartTime><Timestamp dt:dt="int">0</Timestamp><DateUtc dt:dt="string">2021-12-20T08:40:27Z</DateUtc></StartTime><FrequencyChanges><FrequencyChange><Frequency dt:dt="r8">10000000</Frequency><Timestamp dt:dt="r8">305379635201</Timestamp><Current dt:dt…	60.005	1.0.0.33	1	438939341	2.0.10.182	12-20-2021	2021-12-20 08:40:27	16:40:27	2.0.10.92	1	affpro	WordList	1	1	1	112	NULL	j	NULL	NULL	16	NULL	NULL	NULL	NULL	NULL	NULL	NULL	NULL	2	16	16	pra3	practiceList2	动物转基因+有争议的	NULL	NULL	NULL	NULL	NULL	NULL	NULL	NULL	NULL	NULL	NULL
大创GO-NOGO	1	2	<?xml version="1.0"?>\n<Clock xmlns:dt="urn:schemas-microsoft-com:datatypes"><Description dt:dt="string">E-Prime Primary Realtime Clock</Description><StartTime><Timestamp dt:dt="int">0</Timestamp><DateUtc dt:dt="string">2021-12-20T08:40:27Z</DateUtc></StartTime><FrequencyChanges><FrequencyChange><Frequency dt:dt="r8">10000000</Frequency><Timestamp dt:dt="r8">305379635201</Timestamp><Current dt:dt…	60.005	1.0.0.33	1	438939341	2.0.10.182	12-20-2021	2021-12-20 08:40:27	16:40:27	2.0.10.92	1	affpro	WordList	1	1	1	113	NULL		NULL	NULL	NULL	NULL	NULL	NULL	12	NULL	NULL	NULL	NULL	1	17	17	pra3	practiceList2	转基因大豆+创新的	NULL	NULL	NULL	NULL	NULL	NULL	NULL	NULL	NULL	NULL	NULL
大创GO-NOGO	1	2	<?xml version="1.0"?>\n<Clock xmlns:dt="urn:schemas-microsoft-com:datatypes"><Description dt:dt="string">E-Prime Primary Realtime Clock</Description><StartTime><Timestamp dt:dt="int">0</Timestamp><DateUtc dt:dt="string">2021-12-20T08:40:27Z</DateUtc></StartTime><FrequencyChanges><FrequencyChange><Frequency dt:dt="r8">10000000</Frequency><Timestamp dt:dt="r8">305379635201</Timestamp><Current dt:dt…	60.005	1.0.0.33	1	438939341	2.0.10.182	12-20-2021	2021-12-20 08:40:27	16:40:27	2.0.10.92	1	affpro	WordList	1	1	1	114	NULL	j	NULL	NULL	8	NULL	NULL	NULL	NULL	NULL	NULL	NULL	NULL	2	18	18	pra3	practiceList2	抗虫害棉花+有争议的	NULL	NULL	NULL	NULL	NULL	NULL	NULL	NULL	NULL	NULL	NULL
大创GO-NOGO	1	2	<?xml version="1.0"?>\n<Clock xmlns:dt="urn:schemas-microsoft-com:datatypes"><Description dt:dt="string">E-Prime Primary Realtime Clock</Description><StartTime><Timestamp dt:dt="int">0</Timestamp><DateUtc dt:dt="string">2021-12-20T08:40:27Z</DateUtc></StartTime><FrequencyChanges><FrequencyChange><Frequency dt:dt="r8">10000000</Frequency><Timestamp dt:dt="r8">305379635201</Timestamp><Current dt:dt…	60.005	1.0.0.33	1	438939341	2.0.10.182	12-20-2021	2021-12-20 08:40:27	16:40:27	2.0.10.92	1	affpro	WordList	1	1	1	115	NULL	j	NULL	NULL	1	NULL	NULL	NULL	NULL	NULL	NULL	NULL	NULL	2	19	19	pra3	practiceList2	转基因食物+不成熟的	NULL	NULL	NULL	NULL	NULL	NULL	NULL	NULL	NULL	NULL	NULL
大创GO-NOGO	1	2	<?xml version="1.0"?>\n<Clock xmlns:dt="urn:schemas-microsoft-com:datatypes"><Description dt:dt="string">E-Prime Primary Realtime Clock</Description><StartTime><Timestamp dt:dt="int">0</Timestamp><DateUtc dt:dt="string">2021-12-20T08:40:27Z</DateUtc></StartTime><FrequencyChanges><FrequencyChange><Frequency dt:dt="r8">10000000</Frequency><Timestamp dt:dt="r8">305379635201</Timestamp><Current dt:dt…	60.005	1.0.0.33	1	438939341	2.0.10.182	12-20-2021	2021-12-20 08:40:27	16:40:27	2.0.10.92	1	affpro	WordList	1	1	1	116	NULL	j	NULL	NULL	4	NULL	NULL	NULL	NULL	NULL	NULL	NULL	NULL	2	20	20	pra3	practiceList2	转基因食物+有争议的	NULL	NULL	NULL	NULL	NULL	NULL	NULL	NULL	NULL	NULL	NULL
大创GO-NOGO	1	2	<?xml version="1.0"?>\n<Clock xmlns:dt="urn:schemas-microsoft-com:datatypes"><Description dt:dt="string">E-Prime Primary Realtime Clock</Description><StartTime><Timestamp dt:dt="int">0</Timestamp><DateUtc dt:dt="string">2021-12-20T08:40:27Z</DateUtc></StartTime><FrequencyChanges><FrequencyChange><Frequency dt:dt="r8">10000000</Frequency><Timestamp dt:dt="r8">305379635201</Timestamp><Current dt:dt…	60.005	1.0.0.33	1	438939341	2.0.10.182	12-20-2021	2021-12-20 08:40:27	16:40:27	2.0.10.92	1	affpro	WordList	1	1	1	117	NULL	j	NULL	NULL	3	NULL	NULL	NULL	NULL	NULL	NULL	NULL	NULL	2	21	21	pra3	practiceList2	转基因食物+非天然的	NULL	NULL	NULL	NULL	NULL	NULL	NULL	NULL	NULL	NULL	NULL
大创GO-NOGO	1	2	<?xml version="1.0"?>\n<Clock xmlns:dt="urn:schemas-microsoft-com:datatypes"><Description dt:dt="string">E-Prime Primary Realtime Clock</Description><StartTime><Timestamp dt:dt="int">0</Timestamp><DateUtc dt:dt="string">2021-12-20T08:40:27Z</DateUtc></StartTime><FrequencyChanges><FrequencyChange><Frequency dt:dt="r8">10000000</Frequency><Timestamp dt:dt="r8">305379635201</Timestamp><Current dt:dt…	60.005	1.0.0.33	1	438939341	2.0.10.182	12-20-2021	2021-12-20 08:40:27	16:40:27	2.0.10.92	1	affpro	WordList	1	1	1	118	NULL	j	NULL	NULL	11	NULL	NULL	NULL	NULL	NULL	NULL	NULL	NULL	2	22	22	pra3	practiceList2	转基因大豆+非天然的	NULL	NULL	NULL	NULL	NULL	NULL	NULL	NULL	NULL	NULL	NULL
大创GO-NOGO	1	2	<?xml version="1.0"?>\n<Clock xmlns:dt="urn:schemas-microsoft-com:datatypes"><Description dt:dt="string">E-Prime Primary Realtime Clock</Description><StartTime><Timestamp dt:dt="int">0</Timestamp><DateUtc dt:dt="string">2021-12-20T08:40:27Z</DateUtc></StartTime><FrequencyChanges><FrequencyChange><Frequency dt:dt="r8">10000000</Frequency><Timestamp dt:dt="r8">305379635201</Timestamp><Current dt:dt…	60.005	1.0.0.33	1	438939341	2.0.10.182	12-20-2021	2021-12-20 08:40:27	16:40:27	2.0.10.92	1	affpro	WordList	1	1	1	119	NULL		NULL	NULL	NULL	NULL	NULL	NULL	5	NULL	NULL	NULL	NULL	1	23	23	pra3	practiceList2	抗虫害棉花+科学的	NULL	NULL	NULL	NULL	NULL	NULL	NULL	NULL	NULL	NULL	NULL
大创GO-NOGO	1	2	<?xml version="1.0"?>\n<Clock xmlns:dt="urn:schemas-microsoft-com:datatypes"><Description dt:dt="string">E-Prime Primary Realtime Clock</Description><StartTime><Timestamp dt:dt="int">0</Timestamp><DateUtc dt:dt="string">2021-12-20T08:40:27Z</DateUtc></StartTime><FrequencyChanges><FrequencyChange><Frequency dt:dt="r8">10000000</Frequency><Timestamp dt:dt="r8">305379635201</Timestamp><Current dt:dt…	60.005	1.0.0.33	1	438939341	2.0.10.182	12-20-2021	2021-12-20 08:40:27	16:40:27	2.0.10.92	1	affpro	WordList	1	1	1	120	NULL		NULL	NULL	NULL	NULL	NULL	NULL	8	NULL	NULL	NULL	NULL	1	24	24	pra3	practiceList2	抗虫害棉花+创新的	NULL	NULL	NULL	NULL	NULL	NULL	NULL	NULL	NULL	NULL	NULL
大创GO-NOGO	1	2	<?xml version="1.0"?>\n<Clock xmlns:dt="urn:schemas-microsoft-com:datatypes"><Description dt:dt="string">E-Prime Primary Realtime Clock</Description><StartTime><Timestamp dt:dt="int">0</Timestamp><DateUtc dt:dt="string">2021-12-20T08:40:27Z</DateUtc></StartTime><FrequencyChanges><FrequencyChange><Frequency dt:dt="r8">10000000</Frequency><Timestamp dt:dt="r8">305379635201</Timestamp><Current dt:dt…	60.005	1.0.0.33	1	438939341	2.0.10.182	12-20-2021	2021-12-20 08:40:27	16:40:27	2.0.10.92	1	affpro	WordList	1	1	1	121	NULL		NULL	NULL	NULL	NULL	NULL	NULL	NULL	14	NULL	NULL	NULL	NULL	NULL	NULL	pra4	taskList2	动物转基因+高产的	NULL	NULL	NULL	NULL	NULL	NULL	NULL	NULL	NULL	NULL	NULL
大创GO-NOGO	1	2	<?xml version="1.0"?>\n<Clock xmlns:dt="urn:schemas-microsoft-com:datatypes"><Description dt:dt="string">E-Prime Primary Realtime Clock</Description><StartTime><Timestamp dt:dt="int">0</Timestamp><DateUtc dt:dt="string">2021-12-20T08:40:27Z</DateUtc></StartTime><FrequencyChanges><FrequencyChange><Frequency dt:dt="r8">10000000</Frequency><Timestamp dt:dt="r8">305379635201</Timestamp><Current dt:dt…	60.005	1.0.0.33	1	438939341	2.0.10.182	12-20-2021	2021-12-20 08:40:27	16:40:27	2.0.10.92	1	affpro	WordList	1	1	1	122	NULL	j	NULL	NULL	NULL	9	NULL	NULL	NULL	NULL	NULL	NULL	NULL	NULL	NULL	NULL	pra4	taskList2	转基因大豆+不成熟的	NULL	NULL	NULL	NULL	NULL	NULL	NULL	NULL	NULL	NULL	NULL
大创GO-NOGO	1	2	<?xml version="1.0"?>\n<Clock xmlns:dt="urn:schemas-microsoft-com:datatypes"><Description dt:dt="string">E-Prime Primary Realtime Clock</Description><StartTime><Timestamp dt:dt="int">0</Timestamp><DateUtc dt:dt="string">2021-12-20T08:40:27Z</DateUtc></StartTime><FrequencyChanges><FrequencyChange><Frequency dt:dt="r8">10000000</Frequency><Timestamp dt:dt="r8">305379635201</Timestamp><Current dt:dt…	60.005	1.0.0.33	1	438939341	2.0.10.182	12-20-2021	2021-12-20 08:40:27	16:40:27	2.0.10.92	1	affpro	WordList	1	1	1	123	NULL	j	NULL	NULL	NULL	6	NULL	NULL	NULL	NULL	NULL	NULL	NULL	NULL	NULL	NULL	pra4	taskList2	抗虫害棉花+高风险的	NULL	NULL	NULL	NULL	NULL	NULL	NULL	NULL	NULL	NULL	NULL
大创GO-NOGO	1	2	<?xml version="1.0"?>\n<Clock xmlns:dt="urn:schemas-microsoft-com:datatypes"><Description dt:dt="string">E-Prime Primary Realtime Clock</Description><StartTime><Timestamp dt:dt="int">0</Timestamp><DateUtc dt:dt="string">2021-12-20T08:40:27Z</DateUtc></StartTime><FrequencyChanges><FrequencyChange><Frequency dt:dt="r8">10000000</Frequency><Timestamp dt:dt="r8">305379635201</Timestamp><Current dt:dt…	60.005	1.0.0.33	1	438939341	2.0.10.182	12-20-2021	2021-12-20 08:40:27	16:40:27	2.0.10.92	1	affpro	WordList	1	1	1	124	NULL	j	NULL	NULL	NULL	10	NULL	NULL	NULL	NULL	NULL	NULL	NULL	NULL	NULL	NULL	pra4	taskList2	转基因大豆+高风险的	NULL	NULL	NULL	NULL	NULL	NULL	NULL	NULL	NULL	NULL	NULL
大创GO-NOGO	1	2	<?xml version="1.0"?>\n<Clock xmlns:dt="urn:schemas-microsoft-com:datatypes"><Description dt:dt="string">E-Prime Primary Realtime Clock</Description><StartTime><Timestamp dt:dt="int">0</Timestamp><DateUtc dt:dt="string">2021-12-20T08:40:27Z</DateUtc></StartTime><FrequencyChanges><FrequencyChange><Frequency dt:dt="r8">10000000</Frequency><Timestamp dt:dt="r8">305379635201</Timestamp><Current dt:dt…	60.005	1.0.0.33	1	438939341	2.0.10.182	12-20-2021	2021-12-20 08:40:27	16:40:27	2.0.10.92	1	affpro	WordList	1	1	1	125	NULL	j	NULL	NULL	NULL	12	NULL	NULL	NULL	NULL	NULL	NULL	NULL	NULL	NULL	NULL	pra4	taskList2	转基因大豆+有争议的	NULL	NULL	NULL	NULL	NULL	NULL	NULL	NULL	NULL	NULL	NULL
大创GO-NOGO	1	2	<?xml version="1.0"?>\n<Clock xmlns:dt="urn:schemas-microsoft-com:datatypes"><Description dt:dt="string">E-Prime Primary Realtime Clock</Description><StartTime><Timestamp dt:dt="int">0</Timestamp><DateUtc dt:dt="string">2021-12-20T08:40:27Z</DateUtc></StartTime><FrequencyChanges><FrequencyChange><Frequency dt:dt="r8">10000000</Frequency><Timestamp dt:dt="r8">305379635201</Timestamp><Current dt:dt…	60.005	1.0.0.33	1	438939341	2.0.10.182	12-20-2021	2021-12-20 08:40:27	16:40:27	2.0.10.92	1	affpro	WordList	1	1	1	126	NULL	j	NULL	NULL	NULL	5	NULL	NULL	NULL	NULL	NULL	NULL	NULL	NULL	NULL	NULL	pra4	taskList2	抗虫害棉花+不成熟的	NULL	NULL	NULL	NULL	NULL	NULL	NULL	NULL	NULL	NULL	NULL
大创GO-NOGO	1	2	<?xml version="1.0"?>\n<Clock xmlns:dt="urn:schemas-microsoft-com:datatypes"><Description dt:dt="string">E-Prime Primary Realtime Clock</Description><StartTime><Timestamp dt:dt="int">0</Timestamp><DateUtc dt:dt="string">2021-12-20T08:40:27Z</DateUtc></StartTime><FrequencyChanges><FrequencyChange><Frequency dt:dt="r8">10000000</Frequency><Timestamp dt:dt="r8">305379635201</Timestamp><Current dt:dt…	60.005	1.0.0.33	1	438939341	2.0.10.182	12-20-2021	2021-12-20 08:40:27	16:40:27	2.0.10.92	1	affpro	WordList	1	1	1	127	NULL		NULL	NULL	NULL	NULL	NULL	NULL	NULL	7	NULL	NULL	NULL	NULL	NULL	NULL	pra4	taskList2	抗虫害棉花+高科技的	NULL	NULL	NULL	NULL	NULL	NULL	NULL	NULL	NULL	NULL	NULL
大创GO-NOGO	1	2	<?xml version="1.0"?>\n<Clock xmlns:dt="urn:schemas-microsoft-com:datatypes"><Description dt:dt="string">E-Prime Primary Realtime Clock</Description><StartTime><Timestamp dt:dt="int">0</Timestamp><DateUtc dt:dt="string">2021-12-20T08:40:27Z</DateUtc></StartTime><FrequencyChanges><FrequencyChange><Frequency dt:dt="r8">10000000</Frequency><Timestamp dt:dt="r8">305379635201</Timestamp><Current dt:dt…	60.005	1.0.0.33	1	438939341	2.0.10.182	12-20-2021	2021-12-20 08:40:27	16:40:27	2.0.10.92	1	affpro	WordList	1	1	1	128	NULL	j	NULL	NULL	NULL	1	NULL	NULL	NULL	NULL	NULL	NULL	NULL	NULL	NULL	NULL	pra4	taskList2	转基因食物+不成熟的	NULL	NULL	NULL	NULL	NULL	NULL	NULL	NULL	NULL	NULL	NULL
大创GO-NOGO	1	2	<?xml version="1.0"?>\n<Clock xmlns:dt="urn:schemas-microsoft-com:datatypes"><Description dt:dt="string">E-Prime Primary Realtime Clock</Description><StartTime><Timestamp dt:dt="int">0</Timestamp><DateUtc dt:dt="string">2021-12-20T08:40:27Z</DateUtc></StartTime><FrequencyChanges><FrequencyChange><Frequency dt:dt="r8">10000000</Frequency><Timestamp dt:dt="r8">305379635201</Timestamp><Current dt:dt…	60.005	1.0.0.33	1	438939341	2.0.10.182	12-20-2021	2021-12-20 08:40:27	16:40:27	2.0.10.92	1	affpro	WordList	1	1	1	129	NULL		NULL	NULL	NULL	NULL	NULL	NULL	NULL	2	NULL	NULL	NULL	NULL	NULL	NULL	pra4	taskList2	转基因食物+高产的	NULL	NULL	NULL	NULL	NULL	NULL	NULL	NULL	NULL	NULL	NULL
大创GO-NOGO	1	2	<?xml version="1.0"?>\n<Clock xmlns:dt="urn:schemas-microsoft-com:datatypes"><Description dt:dt="string">E-Prime Primary Realtime Clock</Description><StartTime><Timestamp dt:dt="int">0</Timestamp><DateUtc dt:dt="string">2021-12-20T08:40:27Z</DateUtc></StartTime><FrequencyChanges><FrequencyChange><Frequency dt:dt="r8">10000000</Frequency><Timestamp dt:dt="r8">305379635201</Timestamp><Current dt:dt…	60.005	1.0.0.33	1	438939341	2.0.10.182	12-20-2021	2021-12-20 08:40:27	16:40:27	2.0.10.92	1	affpro	WordList	1	1	1	130	NULL		NULL	NULL	NULL	NULL	NULL	NULL	NULL	3	NULL	NULL	NULL	NULL	NULL	NULL	pra4	taskList2	转基因食物+高科技的	NULL	NULL	NULL	NULL	NULL	NULL	NULL	NULL	NULL	NULL	NULL
大创GO-NOGO	1	2	<?xml version="1.0"?>\n<Clock xmlns:dt="urn:schemas-microsoft-com:datatypes"><Description dt:dt="string">E-Prime Primary Realtime Clock</Description><StartTime><Timestamp dt:dt="int">0</Timestamp><DateUtc dt:dt="string">2021-12-20T08:40:27Z</DateUtc></StartTime><FrequencyChanges><FrequencyChange><Frequency dt:dt="r8">10000000</Frequency><Timestamp dt:dt="r8">305379635201</Timestamp><Current dt:dt…	60.005	1.0.0.33	1	438939341	2.0.10.182	12-20-2021	2021-12-20 08:40:27	16:40:27	2.0.10.92	1	affpro	WordList	1	1	1	131	NULL	j	NULL	NULL	NULL	13	NULL	NULL	NULL	NULL	NULL	NULL	NULL	NULL	NULL	NULL	pra4	taskList2	动物转基因+不成熟的	NULL	NULL	NULL	NULL	NULL	NULL	NULL	NULL	NULL	NULL	NULL
大创GO-NOGO	1	2	<?xml version="1.0"?>\n<Clock xmlns:dt="urn:schemas-microsoft-com:datatypes"><Description dt:dt="string">E-Prime Primary Realtime Clock</Description><StartTime><Timestamp dt:dt="int">0</Timestamp><DateUtc dt:dt="string">2021-12-20T08:40:27Z</DateUtc></StartTime><FrequencyChanges><FrequencyChange><Frequency dt:dt="r8">10000000</Frequency><Timestamp dt:dt="r8">305379635201</Timestamp><Current dt:dt…	60.005	1.0.0.33	1	438939341	2.0.10.182	12-20-2021	2021-12-20 08:40:27	16:40:27	2.0.10.92	1	affpro	WordList	1	1	1	132	NULL	j	NULL	NULL	NULL	2	NULL	NULL	NULL	NULL	NULL	NULL	NULL	NULL	NULL	NULL	pra4	taskList2	转基因食物+高风险的	NULL	NULL	NULL	NULL	NULL	NULL	NULL	NULL	NULL	NULL	NULL
大创GO-NOGO	1	2	<?xml version="1.0"?>\n<Clock xmlns:dt="urn:schemas-microsoft-com:datatypes"><Description dt:dt="string">E-Prime Primary Realtime Clock</Description><StartTime><Timestamp dt:dt="int">0</Timestamp><DateUtc dt:dt="string">2021-12-20T08:40:27Z</DateUtc></StartTime><FrequencyChanges><FrequencyChange><Frequency dt:dt="r8">10000000</Frequency><Timestamp dt:dt="r8">305379635201</Timestamp><Current dt:dt…	60.005	1.0.0.33	1	438939341	2.0.10.182	12-20-2021	2021-12-20 08:40:27	16:40:27	2.0.10.92	1	affpro	WordList	1	1	1	133	NULL	j	NULL	NULL	NULL	7	NULL	NULL	NULL	NULL	NULL	NULL	NULL	NULL	NULL	NULL	pra4	taskList2	抗虫害棉花+非天然的	NULL	NULL	NULL	NULL	NULL	NULL	NULL	NULL	NULL	NULL	NULL
大创GO-NOGO	1	2	<?xml version="1.0"?>\n<Clock xmlns:dt="urn:schemas-microsoft-com:datatypes"><Description dt:dt="string">E-Prime Primary Realtime Clock</Description><StartTime><Timestamp dt:dt="int">0</Timestamp><DateUtc dt:dt="string">2021-12-20T08:40:27Z</DateUtc></StartTime><FrequencyChanges><FrequencyChange><Frequency dt:dt="r8">10000000</Frequency><Timestamp dt:dt="r8">305379635201</Timestamp><Current dt:dt…	60.005	1.0.0.33	1	438939341	2.0.10.182	12-20-2021	2021-12-20 08:40:27	16:40:27	2.0.10.92	1	affpro	WordList	1	1	1	134	NULL	j	NULL	NULL	NULL	4	NULL	NULL	NULL	NULL	NULL	NULL	NULL	NULL	NULL	NULL	pra4	taskList2	转基因食物+有争议的	NULL	NULL	NULL	NULL	NULL	NULL	NULL	NULL	NULL	NULL	NULL
大创GO-NOGO	1	2	<?xml version="1.0"?>\n<Clock xmlns:dt="urn:schemas-microsoft-com:datatypes"><Description dt:dt="string">E-Prime Primary Realtime Clock</Description><StartTime><Timestamp dt:dt="int">0</Timestamp><DateUtc dt:dt="string">2021-12-20T08:40:27Z</DateUtc></StartTime><FrequencyChanges><FrequencyChange><Frequency dt:dt="r8">10000000</Frequency><Timestamp dt:dt="r8">305379635201</Timestamp><Current dt:dt…	60.005	1.0.0.33	1	438939341	2.0.10.182	12-20-2021	2021-12-20 08:40:27	16:40:27	2.0.10.92	1	affpro	WordList	1	1	1	135	NULL	j	NULL	NULL	NULL	11	NULL	NULL	NULL	NULL	NULL	NULL	NULL	NULL	NULL	NULL	pra4	taskList2	转基因大豆+非天然的	NULL	NULL	NULL	NULL	NULL	NULL	NULL	NULL	NULL	NULL	NULL
大创GO-NOGO	1	2	<?xml version="1.0"?>\n<Clock xmlns:dt="urn:schemas-microsoft-com:datatypes"><Description dt:dt="string">E-Prime Primary Realtime Clock</Description><StartTime><Timestamp dt:dt="int">0</Timestamp><DateUtc dt:dt="string">2021-12-20T08:40:27Z</DateUtc></StartTime><FrequencyChanges><FrequencyChange><Frequency dt:dt="r8">10000000</Frequency><Timestamp dt:dt="r8">305379635201</Timestamp><Current dt:dt…	60.005	1.0.0.33	1	438939341	2.0.10.182	12-20-2021	2021-12-20 08:40:27	16:40:27	2.0.10.92	1	affpro	WordList	1	1	1	136	NULL	j	NULL	NULL	NULL	14	NULL	NULL	NULL	NULL	NULL	NULL	NULL	NULL	NULL	NULL	pra4	taskList2	动物转基因+高风险的	NULL	NULL	NULL	NULL	NULL	NULL	NULL	NULL	NULL	NULL	NULL
大创GO-NOGO	1	2	<?xml version="1.0"?>\n<Clock xmlns:dt="urn:schemas-microsoft-com:datatypes"><Description dt:dt="string">E-Prime Primary Realtime Clock</Description><StartTime><Timestamp dt:dt="int">0</Timestamp><DateUtc dt:dt="string">2021-12-20T08:40:27Z</DateUtc></StartTime><FrequencyChanges><FrequencyChange><Frequency dt:dt="r8">10000000</Frequency><Timestamp dt:dt="r8">305379635201</Timestamp><Current dt:dt…	60.005	1.0.0.33	1	438939341	2.0.10.182	12-20-2021	2021-12-20 08:40:27	16:40:27	2.0.10.92	1	affpro	WordList	1	1	1	137	NULL		NULL	NULL	NULL	NULL	NULL	NULL	NULL	11	NULL	NULL	NULL	NULL	NULL	NULL	pra4	taskList2	转基因大豆+高科技的	NULL	NULL	NULL	NULL	NULL	NULL	NULL	NULL	NULL	NULL	NULL
大创GO-NOGO	1	2	<?xml version="1.0"?>\n<Clock xmlns:dt="urn:schemas-microsoft-com:datatypes"><Description dt:dt="string">E-Prime Primary Realtime Clock</Description><StartTime><Timestamp dt:dt="int">0</Timestamp><DateUtc dt:dt="string">2021-12-20T08:40:27Z</DateUtc></StartTime><FrequencyChanges><FrequencyChange><Frequency dt:dt="r8">10000000</Frequency><Timestamp dt:dt="r8">305379635201</Timestamp><Current dt:dt…	60.005	1.0.0.33	1	438939341	2.0.10.182	12-20-2021	2021-12-20 08:40:27	16:40:27	2.0.10.92	1	affpro	WordList	1	1	1	138	NULL		NULL	NULL	NULL	NULL	NULL	NULL	NULL	9	NULL	NULL	NULL	NULL	NULL	NULL	pra4	taskList2	转基因大豆+科学的	NULL	NULL	NULL	NULL	NULL	NULL	NULL	NULL	NULL	NULL	NULL
大创GO-NOGO	1	2	<?xml version="1.0"?>\n<Clock xmlns:dt="urn:schemas-microsoft-com:datatypes"><Description dt:dt="string">E-Prime Primary Realtime Clock</Description><StartTime><Timestamp dt:dt="int">0</Timestamp><DateUtc dt:dt="string">2021-12-20T08:40:27Z</DateUtc></StartTime><FrequencyChanges><FrequencyChange><Frequency dt:dt="r8">10000000</Frequency><Timestamp dt:dt="r8">305379635201</Timestamp><Current dt:dt…	60.005	1.0.0.33	1	438939341	2.0.10.182	12-20-2021	2021-12-20 08:40:27	16:40:27	2.0.10.92	1	affpro	WordList	1	1	1	139	NULL		NULL	NULL	NULL	NULL	NULL	NULL	NULL	1	NULL	NULL	NULL	NULL	NULL	NULL	pra4	taskList2	转基因食物+科学的	NULL	NULL	NULL	NULL	NULL	NULL	NULL	NULL	NULL	NULL	NULL
大创GO-NOGO	1	2	<?xml version="1.0"?>\n<Clock xmlns:dt="urn:schemas-microsoft-com:datatypes"><Description dt:dt="string">E-Prime Primary Realtime Clock</Description><StartTime><Timestamp dt:dt="int">0</Timestamp><DateUtc dt:dt="string">2021-12-20T08:40:27Z</DateUtc></StartTime><FrequencyChanges><FrequencyChange><Frequency dt:dt="r8">10000000</Frequency><Timestamp dt:dt="r8">305379635201</Timestamp><Current dt:dt…	60.005	1.0.0.33	1	438939341	2.0.10.182	12-20-2021	2021-12-20 08:40:27	16:40:27	2.0.10.92	1	affpro	WordList	1	1	1	140	NULL	j	NULL	NULL	NULL	15	NULL	NULL	NULL	NULL	NULL	NULL	NULL	NULL	NULL	NULL	pra4	taskList2	动物转基因+非天然的	NULL	NULL	NULL	NULL	NULL	NULL	NULL	NULL	NULL	NULL	NULL
大创GO-NOGO	1	2	<?xml version="1.0"?>\n<Clock xmlns:dt="urn:schemas-microsoft-com:datatypes"><Description dt:dt="string">E-Prime Primary Realtime Clock</Description><StartTime><Timestamp dt:dt="int">0</Timestamp><DateUtc dt:dt="string">2021-12-20T08:40:27Z</DateUtc></StartTime><FrequencyChanges><FrequencyChange><Frequency dt:dt="r8">10000000</Frequency><Timestamp dt:dt="r8">305379635201</Timestamp><Current dt:dt…	60.005	1.0.0.33	1	438939341	2.0.10.182	12-20-2021	2021-12-20 08:40:27	16:40:27	2.0.10.92	1	affpro	WordList	1	1	1	141	NULL		NULL	NULL	NULL	NULL	NULL	NULL	NULL	13	NULL	NULL	NULL	NULL	NULL	NULL	pra4	taskList2	动物转基因+科学的	NULL	NULL	NULL	NULL	NULL	NULL	NULL	NULL	NULL	NULL	NULL
大创GO-NOGO	1	2	<?xml version="1.0"?>\n<Clock xmlns:dt="urn:schemas-microsoft-com:datatypes"><Description dt:dt="string">E-Prime Primary Realtime Clock</Description><StartTime><Timestamp dt:dt="int">0</Timestamp><DateUtc dt:dt="string">2021-12-20T08:40:27Z</DateUtc></StartTime><FrequencyChanges><FrequencyChange><Frequency dt:dt="r8">10000000</Frequency><Timestamp dt:dt="r8">305379635201</Timestamp><Current dt:dt…	60.005	1.0.0.33	1	438939341	2.0.10.182	12-20-2021	2021-12-20 08:40:27	16:40:27	2.0.10.92	1	affpro	WordList	1	1	1	142	NULL		NULL	NULL	NULL	NULL	NULL	NULL	NULL	15	NULL	NULL	NULL	NULL	NULL	NULL	pra4	taskList2	动物转基因+高科技的	NULL	NULL	NULL	NULL	NULL	NULL	NULL	NULL	NULL	NULL	NULL
大创GO-NOGO	1	2	<?xml version="1.0"?>\n<Clock xmlns:dt="urn:schemas-microsoft-com:datatypes"><Description dt:dt="string">E-Prime Primary Realtime Clock</Description><StartTime><Timestamp dt:dt="int">0</Timestamp><DateUtc dt:dt="string">2021-12-20T08:40:27Z</DateUtc></StartTime><FrequencyChanges><FrequencyChange><Frequency dt:dt="r8">10000000</Frequency><Timestamp dt:dt="r8">305379635201</Timestamp><Current dt:dt…	60.005	1.0.0.33	1	438939341	2.0.10.182	12-20-2021	2021-12-20 08:40:27	16:40:27	2.0.10.92	1	affpro	WordList	1	1	1	143	NULL	j	NULL	NULL	NULL	8	NULL	NULL	NULL	NULL	NULL	NULL	NULL	NULL	NULL	NULL	pra4	taskList2	抗虫害棉花+有争议的	NULL	NULL	NULL	NULL	NULL	NULL	NULL	NULL	NULL	NULL	NULL
大创GO-NOGO	1	2	<?xml version="1.0"?>\n<Clock xmlns:dt="urn:schemas-microsoft-com:datatypes"><Description dt:dt="string">E-Prime Primary Realtime Clock</Description><StartTime><Timestamp dt:dt="int">0</Timestamp><DateUtc dt:dt="string">2021-12-20T08:40:27Z</DateUtc></StartTime><FrequencyChanges><FrequencyChange><Frequency dt:dt="r8">10000000</Frequency><Timestamp dt:dt="r8">305379635201</Timestamp><Current dt:dt…	60.005	1.0.0.33	1	438939341	2.0.10.182	12-20-2021	2021-12-20 08:40:27	16:40:27	2.0.10.92	1	affpro	WordList	1	1	1	144	NULL		NULL	NULL	NULL	NULL	NULL	NULL	NULL	4	NULL	NULL	NULL	NULL	NULL	NULL	pra4	taskList2	转基因食物+创新的	NULL	NULL	NULL	NULL	NULL	NULL	NULL	NULL	NULL	NULL	NULL
大创GO-NOGO	1	2	<?xml version="1.0"?>\n<Clock xmlns:dt="urn:schemas-microsoft-com:datatypes"><Description dt:dt="string">E-Prime Primary Realtime Clock</Description><StartTime><Timestamp dt:dt="int">0</Timestamp><DateUtc dt:dt="string">2021-12-20T08:40:27Z</DateUtc></StartTime><FrequencyChanges><FrequencyChange><Frequency dt:dt="r8">10000000</Frequency><Timestamp dt:dt="r8">305379635201</Timestamp><Current dt:dt…	60.005	1.0.0.33	1	438939341	2.0.10.182	12-20-2021	2021-12-20 08:40:27	16:40:27	2.0.10.92	1	affpro	WordList	1	1	1	145	NULL	j	NULL	NULL	NULL	16	NULL	NULL	NULL	NULL	NULL	NULL	NULL	NULL	NULL	NULL	pra4	taskList2	动物转基因+有争议的	NULL	NULL	NULL	NULL	NULL	NULL	NULL	NULL	NULL	NULL	NULL
大创GO-NOGO	1	2	<?xml version="1.0"?>\n<Clock xmlns:dt="urn:schemas-microsoft-com:datatypes"><Description dt:dt="string">E-Prime Primary Realtime Clock</Description><StartTime><Timestamp dt:dt="int">0</Timestamp><DateUtc dt:dt="string">2021-12-20T08:40:27Z</DateUtc></StartTime><FrequencyChanges><FrequencyChange><Frequency dt:dt="r8">10000000</Frequency><Timestamp dt:dt="r8">305379635201</Timestamp><Current dt:dt…	60.005	1.0.0.33	1	438939341	2.0.10.182	12-20-2021	2021-12-20 08:40:27	16:40:27	2.0.10.92	1	affpro	WordList	1	1	1	146	NULL	j	NULL	NULL	NULL	3	NULL	NULL	NULL	NULL	NULL	NULL	NULL	NULL	NULL	NULL	pra4	taskList2	转基因食物+非天然的	NULL	NULL	NULL	NULL	NULL	NULL	NULL	NULL	NULL	NULL	NULL
大创GO-NOGO	1	2	<?xml version="1.0"?>\n<Clock xmlns:dt="urn:schemas-microsoft-com:datatypes"><Description dt:dt="string">E-Prime Primary Realtime Clock</Description><StartTime><Timestamp dt:dt="int">0</Timestamp><DateUtc dt:dt="string">2021-12-20T08:40:27Z</DateUtc></StartTime><FrequencyChanges><FrequencyChange><Frequency dt:dt="r8">10000000</Frequency><Timestamp dt:dt="r8">305379635201</Timestamp><Current dt:dt…	60.005	1.0.0.33	1	438939341	2.0.10.182	12-20-2021	2021-12-20 08:40:27	16:40:27	2.0.10.92	1	affpro	WordList	1	1	1	147	NULL	j	NULL	NULL	NULL	10	NULL	NULL	NULL	NULL	NULL	NULL	NULL	NULL	NULL	NULL	pra4	taskList2	转基因大豆+高风险的	NULL	NULL	NULL	NULL	NULL	NULL	NULL	NULL	NULL	NULL	NULL
大创GO-NOGO	1	2	<?xml version="1.0"?>\n<Clock xmlns:dt="urn:schemas-microsoft-com:datatypes"><Description dt:dt="string">E-Prime Primary Realtime Clock</Description><StartTime><Timestamp dt:dt="int">0</Timestamp><DateUtc dt:dt="string">2021-12-20T08:40:27Z</DateUtc></StartTime><FrequencyChanges><FrequencyChange><Frequency dt:dt="r8">10000000</Frequency><Timestamp dt:dt="r8">305379635201</Timestamp><Current dt:dt…	60.005	1.0.0.33	1	438939341	2.0.10.182	12-20-2021	2021-12-20 08:40:27	16:40:27	2.0.10.92	1	affpro	WordList	1	1	1	148	NULL	j	NULL	NULL	NULL	8	NULL	NULL	NULL	NULL	NULL	NULL	NULL	NULL	NULL	NULL	pra4	taskList2	抗虫害棉花+有争议的	NULL	NULL	NULL	NULL	NULL	NULL	NULL	NULL	NULL	NULL	NULL
大创GO-NOGO	1	2	<?xml version="1.0"?>\n<Clock xmlns:dt="urn:schemas-microsoft-com:datatypes"><Description dt:dt="string">E-Prime Primary Realtime Clock</Description><StartTime><Timestamp dt:dt="int">0</Timestamp><DateUtc dt:dt="string">2021-12-20T08:40:27Z</DateUtc></StartTime><FrequencyChanges><FrequencyChange><Frequency dt:dt="r8">10000000</Frequency><Timestamp dt:dt="r8">305379635201</Timestamp><Current dt:dt…	60.005	1.0.0.33	1	438939341	2.0.10.182	12-20-2021	2021-12-20 08:40:27	16:40:27	2.0.10.92	1	affpro	WordList	1	1	1	149	NULL	j	NULL	NULL	NULL	12	NULL	NULL	NULL	NULL	NULL	NULL	NULL	NULL	NULL	NULL	pra4	taskList2	转基因大豆+有争议的	NULL	NULL	NULL	NULL	NULL	NULL	NULL	NULL	NULL	NULL	NULL
大创GO-NOGO	1	2	<?xml version="1.0"?>\n<Clock xmlns:dt="urn:schemas-microsoft-com:datatypes"><Description dt:dt="string">E-Prime Primary Realtime Clock</Description><StartTime><Timestamp dt:dt="int">0</Timestamp><DateUtc dt:dt="string">2021-12-20T08:40:27Z</DateUtc></StartTime><FrequencyChanges><FrequencyChange><Frequency dt:dt="r8">10000000</Frequency><Timestamp dt:dt="r8">305379635201</Timestamp><Current dt:dt…	60.005	1.0.0.33	1	438939341	2.0.10.182	12-20-2021	2021-12-20 08:40:27	16:40:27	2.0.10.92	1	affpro	WordList	1	1	1	150	NULL	j	NULL	NULL	NULL	15	NULL	NULL	NULL	NULL	NULL	NULL	NULL	NULL	NULL	NULL	pra4	taskList2	动物转基因+非天然的	NULL	NULL	NULL	NULL	NULL	NULL	NULL	NULL	NULL	NULL	NULL
大创GO-NOGO	1	2	<?xml version="1.0"?>\n<Clock xmlns:dt="urn:schemas-microsoft-com:datatypes"><Description dt:dt="string">E-Prime Primary Realtime Clock</Description><StartTime><Timestamp dt:dt="int">0</Timestamp><DateUtc dt:dt="string">2021-12-20T08:40:27Z</DateUtc></StartTime><FrequencyChanges><FrequencyChange><Frequency dt:dt="r8">10000000</Frequency><Timestamp dt:dt="r8">305379635201</Timestamp><Current dt:dt…	60.005	1.0.0.33	1	438939341	2.0.10.182	12-20-2021	2021-12-20 08:40:27	16:40:27	2.0.10.92	1	affpro	WordList	1	1	1	151	NULL		NULL	NULL	NULL	NULL	NULL	NULL	NULL	16	NULL	NULL	NULL	NULL	NULL	NULL	pra4	taskList2	动物转基因+创新的	NULL	NULL	NULL	NULL	NULL	NULL	NULL	NULL	NULL	NULL	NULL
大创GO-NOGO	1	2	<?xml version="1.0"?>\n<Clock xmlns:dt="urn:schemas-microsoft-com:datatypes"><Description dt:dt="string">E-Prime Primary Realtime Clock</Description><StartTime><Timestamp dt:dt="int">0</Timestamp><DateUtc dt:dt="string">2021-12-20T08:40:27Z</DateUtc></StartTime><FrequencyChanges><FrequencyChange><Frequency dt:dt="r8">10000000</Frequency><Timestamp dt:dt="r8">305379635201</Timestamp><Current dt:dt…	60.005	1.0.0.33	1	438939341	2.0.10.182	12-20-2021	2021-12-20 08:40:27	16:40:27	2.0.10.92	1	affpro	WordList	1	1	1	152	NULL	j	NULL	NULL	NULL	13	NULL	NULL	NULL	NULL	NULL	NULL	NULL	NULL	NULL	NULL	pra4	taskList2	动物转基因+不成熟的	NULL	NULL	NULL	NULL	NULL	NULL	NULL	NULL	NULL	NULL	NULL
大创GO-NOGO	1	2	<?xml version="1.0"?>\n<Clock xmlns:dt="urn:schemas-microsoft-com:datatypes"><Description dt:dt="string">E-Prime Primary Realtime Clock</Description><StartTime><Timestamp dt:dt="int">0</Timestamp><DateUtc dt:dt="string">2021-12-20T08:40:27Z</DateUtc></StartTime><FrequencyChanges><FrequencyChange><Frequency dt:dt="r8">10000000</Frequency><Timestamp dt:dt="r8">305379635201</Timestamp><Current dt:dt…	60.005	1.0.0.33	1	438939341	2.0.10.182	12-20-2021	2021-12-20 08:40:27	16:40:27	2.0.10.92	1	affpro	WordList	1	1	1	153	NULL		NULL	NULL	NULL	NULL	NULL	NULL	NULL	12	NULL	NULL	NULL	NULL	NULL	NULL	pra4	taskList2	转基因大豆+创新的	NULL	NULL	NULL	NULL	NULL	NULL	NULL	NULL	NULL	NULL	NULL
大创GO-NOGO	1	2	<?xml version="1.0"?>\n<Clock xmlns:dt="urn:schemas-microsoft-com:datatypes"><Description dt:dt="string">E-Prime Primary Realtime Clock</Description><StartTime><Timestamp dt:dt="int">0</Timestamp><DateUtc dt:dt="string">2021-12-20T08:40:27Z</DateUtc></StartTime><FrequencyChanges><FrequencyChange><Frequency dt:dt="r8">10000000</Frequency><Timestamp dt:dt="r8">305379635201</Timestamp><Current dt:dt…	60.005	1.0.0.33	1	438939341	2.0.10.182	12-20-2021	2021-12-20 08:40:27	16:40:27	2.0.10.92	1	affpro	WordList	1	1	1	154	NULL	j	NULL	NULL	NULL	5	NULL	NULL	NULL	NULL	NULL	NULL	NULL	NULL	NULL	NULL	pra4	taskList2	抗虫害棉花+不成熟的	NULL	NULL	NULL	NULL	NULL	NULL	NULL	NULL	NULL	NULL	NULL
大创GO-NOGO	1	2	<?xml version="1.0"?>\n<Clock xmlns:dt="urn:schemas-microsoft-com:datatypes"><Description dt:dt="string">E-Prime Primary Realtime Clock</Description><StartTime><Timestamp dt:dt="int">0</Timestamp><DateUtc dt:dt="string">2021-12-20T08:40:27Z</DateUtc></StartTime><FrequencyChanges><FrequencyChange><Frequency dt:dt="r8">10000000</Frequency><Timestamp dt:dt="r8">305379635201</Timestamp><Current dt:dt…	60.005	1.0.0.33	1	438939341	2.0.10.182	12-20-2021	2021-12-20 08:40:27	16:40:27	2.0.10.92	1	affpro	WordList	1	1	1	155	NULL	j	NULL	NULL	NULL	14	NULL	NULL	NULL	NULL	NULL	NULL	NULL	NULL	NULL	NULL	pra4	taskList2	动物转基因+高风险的	NULL	NULL	NULL	NULL	NULL	NULL	NULL	NULL	NULL	NULL	NULL
大创GO-NOGO	1	2	<?xml version="1.0"?>\n<Clock xmlns:dt="urn:schemas-microsoft-com:datatypes"><Description dt:dt="string">E-Prime Primary Realtime Clock</Description><StartTime><Timestamp dt:dt="int">0</Timestamp><DateUtc dt:dt="string">2021-12-20T08:40:27Z</DateUtc></StartTime><FrequencyChanges><FrequencyChange><Frequency dt:dt="r8">10000000</Frequency><Timestamp dt:dt="r8">305379635201</Timestamp><Current dt:dt…	60.005	1.0.0.33	1	438939341	2.0.10.182	12-20-2021	2021-12-20 08:40:27	16:40:27	2.0.10.92	1	affpro	WordList	1	1	1	156	NULL		NULL	NULL	NULL	NULL	NULL	NULL	NULL	10	NULL	NULL	NULL	NULL	NULL	NULL	pra4	taskList2	转基因大豆+高产的	NULL	NULL	NULL	NULL	NULL	NULL	NULL	NULL	NULL	NULL	NULL
大创GO-NOGO	1	2	<?xml version="1.0"?>\n<Clock xmlns:dt="urn:schemas-microsoft-com:datatypes"><Description dt:dt="string">E-Prime Primary Realtime Clock</Description><StartTime><Timestamp dt:dt="int">0</Timestamp><DateUtc dt:dt="string">2021-12-20T08:40:27Z</DateUtc></StartTime><FrequencyChanges><FrequencyChange><Frequency dt:dt="r8">10000000</Frequency><Timestamp dt:dt="r8">305379635201</Timestamp><Current dt:dt…	60.005	1.0.0.33	1	438939341	2.0.10.182	12-20-2021	2021-12-20 08:40:27	16:40:27	2.0.10.92	1	affpro	WordList	1	1	1	157	NULL		NULL	NULL	NULL	NULL	NULL	NULL	NULL	8	NULL	NULL	NULL	NULL	NULL	NULL	pra4	taskList2	抗虫害棉花+创新的	NULL	NULL	NULL	NULL	NULL	NULL	NULL	NULL	NULL	NULL	NULL
大创GO-NOGO	1	2	<?xml version="1.0"?>\n<Clock xmlns:dt="urn:schemas-microsoft-com:datatypes"><Description dt:dt="string">E-Prime Primary Realtime Clock</Description><StartTime><Timestamp dt:dt="int">0</Timestamp><DateUtc dt:dt="string">2021-12-20T08:40:27Z</DateUtc></StartTime><FrequencyChanges><FrequencyChange><Frequency dt:dt="r8">10000000</Frequency><Timestamp dt:dt="r8">305379635201</Timestamp><Current dt:dt…	60.005	1.0.0.33	1	438939341	2.0.10.182	12-20-2021	2021-12-20 08:40:27	16:40:27	2.0.10.92	1	affpro	WordList	1	1	1	158	NULL	j	NULL	NULL	NULL	11	NULL	NULL	NULL	NULL	NULL	NULL	NULL	NULL	NULL	NULL	pra4	taskList2	转基因大豆+非天然的	NULL	NULL	NULL	NULL	NULL	NULL	NULL	NULL	NULL	NULL	NULL
大创GO-NOGO	1	2	<?xml version="1.0"?>\n<Clock xmlns:dt="urn:schemas-microsoft-com:datatypes"><Description dt:dt="string">E-Prime Primary Realtime Clock</Description><StartTime><Timestamp dt:dt="int">0</Timestamp><DateUtc dt:dt="string">2021-12-20T08:40:27Z</DateUtc></StartTime><FrequencyChanges><FrequencyChange><Frequency dt:dt="r8">10000000</Frequency><Timestamp dt:dt="r8">305379635201</Timestamp><Current dt:dt…	60.005	1.0.0.33	1	438939341	2.0.10.182	12-20-2021	2021-12-20 08:40:27	16:40:27	2.0.10.92	1	affpro	WordList	1	1	1	159	NULL	j	NULL	NULL	NULL	4	NULL	NULL	NULL	NULL	NULL	NULL	NULL	NULL	NULL	NULL	pra4	taskList2	转基因食物+有争议的	NULL	NULL	NULL	NULL	NULL	NULL	NULL	NULL	NULL	NULL	NULL
大创GO-NOGO	1	2	<?xml version="1.0"?>\n<Clock xmlns:dt="urn:schemas-microsoft-com:datatypes"><Description dt:dt="string">E-Prime Primary Realtime Clock</Description><StartTime><Timestamp dt:dt="int">0</Timestamp><DateUtc dt:dt="string">2021-12-20T08:40:27Z</DateUtc></StartTime><FrequencyChanges><FrequencyChange><Frequency dt:dt="r8">10000000</Frequency><Timestamp dt:dt="r8">305379635201</Timestamp><Current dt:dt…	60.005	1.0.0.33	1	438939341	2.0.10.182	12-20-2021	2021-12-20 08:40:27	16:40:27	2.0.10.92	1	affpro	WordList	1	1	1	160	NULL	j	NULL	NULL	NULL	16	NULL	NULL	NULL	NULL	NULL	NULL	NULL	NULL	NULL	NULL	pra4	taskList2	动物转基因+有争议的	NULL	NULL	NULL	NULL	NULL	NULL	NULL	NULL	NULL	NULL	NULL
大创GO-NOGO	1	2	<?xml version="1.0"?>\n<Clock xmlns:dt="urn:schemas-microsoft-com:datatypes"><Description dt:dt="string">E-Prime Primary Realtime Clock</Description><StartTime><Timestamp dt:dt="int">0</Timestamp><DateUtc dt:dt="string">2021-12-20T08:40:27Z</DateUtc></StartTime><FrequencyChanges><FrequencyChange><Frequency dt:dt="r8">10000000</Frequency><Timestamp dt:dt="r8">305379635201</Timestamp><Current dt:dt…	60.005	1.0.0.33	1	438939341	2.0.10.182	12-20-2021	2021-12-20 08:40:27	16:40:27	2.0.10.92	1	affpro	WordList	1	1	1	161	NULL		NULL	NULL	NULL	NULL	NULL	NULL	NULL	6	NULL	NULL	NULL	NULL	NULL	NULL	pra4	taskList2	抗虫害棉花+高产的	NULL	NULL	NULL	NULL	NULL	NULL	NULL	NULL	NULL	NULL	NULL
大创GO-NOGO	1	2	<?xml version="1.0"?>\n<Clock xmlns:dt="urn:schemas-microsoft-com:datatypes"><Description dt:dt="string">E-Prime Primary Realtime Clock</Description><StartTime><Timestamp dt:dt="int">0</Timestamp><DateUtc dt:dt="string">2021-12-20T08:40:27Z</DateUtc></StartTime><FrequencyChanges><FrequencyChange><Frequency dt:dt="r8">10000000</Frequency><Timestamp dt:dt="r8">305379635201</Timestamp><Current dt:dt…	60.005	1.0.0.33	1	438939341	2.0.10.182	12-20-2021	2021-12-20 08:40:27	16:40:27	2.0.10.92	1	affpro	WordList	1	1	1	162	NULL		NULL	NULL	NULL	NULL	NULL	NULL	NULL	5	NULL	NULL	NULL	NULL	NULL	NULL	pra4	taskList2	抗虫害棉花+科学的	NULL	NULL	NULL	NULL	NULL	NULL	NULL	NULL	NULL	NULL	NULL
大创GO-NOGO	1	2	<?xml version="1.0"?>\n<Clock xmlns:dt="urn:schemas-microsoft-com:datatypes"><Description dt:dt="string">E-Prime Primary Realtime Clock</Description><StartTime><Timestamp dt:dt="int">0</Timestamp><DateUtc dt:dt="string">2021-12-20T08:40:27Z</DateUtc></StartTime><FrequencyChanges><FrequencyChange><Frequency dt:dt="r8">10000000</Frequency><Timestamp dt:dt="r8">305379635201</Timestamp><Current dt:dt…	60.005	1.0.0.33	1	438939341	2.0.10.182	12-20-2021	2021-12-20 08:40:27	16:40:27	2.0.10.92	1	affpro	WordList	1	1	1	163	NULL		NULL	NULL	NULL	NULL	NULL	NULL	NULL	12	NULL	NULL	NULL	NULL	NULL	NULL	pra4	taskList2	转基因大豆+创新的	NULL	NULL	NULL	NULL	NULL	NULL	NULL	NULL	NULL	NULL	NULL
大创GO-NOGO	1	2	<?xml version="1.0"?>\n<Clock xmlns:dt="urn:schemas-microsoft-com:datatypes"><Description dt:dt="string">E-Prime Primary Realtime Clock</Description><StartTime><Timestamp dt:dt="int">0</Timestamp><DateUtc dt:dt="string">2021-12-20T08:40:27Z</DateUtc></StartTime><FrequencyChanges><FrequencyChange><Frequency dt:dt="r8">10000000</Frequency><Timestamp dt:dt="r8">305379635201</Timestamp><Current dt:dt…	60.005	1.0.0.33	1	438939341	2.0.10.182	12-20-2021	2021-12-20 08:40:27	16:40:27	2.0.10.92	1	affpro	WordList	1	1	1	164	NULL		NULL	NULL	NULL	NULL	NULL	NULL	NULL	6	NULL	NULL	NULL	NULL	NULL	NULL	pra4	taskList2	抗虫害棉花+高产的	NULL	NULL	NULL	NULL	NULL	NULL	NULL	NULL	NULL	NULL	NULL
大创GO-NOGO	1	2	<?xml version="1.0"?>\n<Clock xmlns:dt="urn:schemas-microsoft-com:datatypes"><Description dt:dt="string">E-Prime Primary Realtime Clock</Description><StartTime><Timestamp dt:dt="int">0</Timestamp><DateUtc dt:dt="string">2021-12-20T08:40:27Z</DateUtc></StartTime><FrequencyChanges><FrequencyChange><Frequency dt:dt="r8">10000000</Frequency><Timestamp dt:dt="r8">305379635201</Timestamp><Current dt:dt…	60.005	1.0.0.33	1	438939341	2.0.10.182	12-20-2021	2021-12-20 08:40:27	16:40:27	2.0.10.92	1	affpro	WordList	1	1	1	165	NULL		NULL	NULL	NULL	NULL	NULL	NULL	NULL	4	NULL	NULL	NULL	NULL	NULL	NULL	pra4	taskList2	转基因食物+创新的	NULL	NULL	NULL	NULL	NULL	NULL	NULL	NULL	NULL	NULL	NULL
大创GO-NOGO	1	2	<?xml version="1.0"?>\n<Clock xmlns:dt="urn:schemas-microsoft-com:datatypes"><Description dt:dt="string">E-Prime Primary Realtime Clock</Description><StartTime><Timestamp dt:dt="int">0</Timestamp><DateUtc dt:dt="string">2021-12-20T08:40:27Z</DateUtc></StartTime><FrequencyChanges><FrequencyChange><Frequency dt:dt="r8">10000000</Frequency><Timestamp dt:dt="r8">305379635201</Timestamp><Current dt:dt…	60.005	1.0.0.33	1	438939341	2.0.10.182	12-20-2021	2021-12-20 08:40:27	16:40:27	2.0.10.92	1	affpro	WordList	1	1	1	166	NULL	j	NULL	NULL	NULL	1	NULL	NULL	NULL	NULL	NULL	NULL	NULL	NULL	NULL	NULL	pra4	taskList2	转基因食物+不成熟的	NULL	NULL	NULL	NULL	NULL	NULL	NULL	NULL	NULL	NULL	NULL
大创GO-NOGO	1	2	<?xml version="1.0"?>\n<Clock xmlns:dt="urn:schemas-microsoft-com:datatypes"><Description dt:dt="string">E-Prime Primary Realtime Clock</Description><StartTime><Timestamp dt:dt="int">0</Timestamp><DateUtc dt:dt="string">2021-12-20T08:40:27Z</DateUtc></StartTime><FrequencyChanges><FrequencyChange><Frequency dt:dt="r8">10000000</Frequency><Timestamp dt:dt="r8">305379635201</Timestamp><Current dt:dt…	60.005	1.0.0.33	1	438939341	2.0.10.182	12-20-2021	2021-12-20 08:40:27	16:40:27	2.0.10.92	1	affpro	WordList	1	1	1	167	NULL		NULL	NULL	NULL	NULL	NULL	NULL	NULL	8	NULL	NULL	NULL	NULL	NULL	NULL	pra4	taskList2	抗虫害棉花+创新的	NULL	NULL	NULL	NULL	NULL	NULL	NULL	NULL	NULL	NULL	NULL
大创GO-NOGO	1	2	<?xml version="1.0"?>\n<Clock xmlns:dt="urn:schemas-microsoft-com:datatypes"><Description dt:dt="string">E-Prime Primary Realtime Clock</Description><StartTime><Timestamp dt:dt="int">0</Timestamp><DateUtc dt:dt="string">2021-12-20T08:40:27Z</DateUtc></StartTime><FrequencyChanges><FrequencyChange><Frequency dt:dt="r8">10000000</Frequency><Timestamp dt:dt="r8">305379635201</Timestamp><Current dt:dt…	60.005	1.0.0.33	1	438939341	2.0.10.182	12-20-2021	2021-12-20 08:40:27	16:40:27	2.0.10.92	1	affpro	WordList	1	1	1	168	NULL	j	NULL	NULL	NULL	6	NULL	NULL	NULL	NULL	NULL	NULL	NULL	NULL	NULL	NULL	pra4	taskList2	抗虫害棉花+高风险的	NULL	NULL	NULL	NULL	NULL	NULL	NULL	NULL	NULL	NULL	NULL
大创GO-NOGO	1	2	<?xml version="1.0"?>\n<Clock xmlns:dt="urn:schemas-microsoft-com:datatypes"><Description dt:dt="string">E-Prime Primary Realtime Clock</Description><StartTime><Timestamp dt:dt="int">0</Timestamp><DateUtc dt:dt="string">2021-12-20T08:40:27Z</DateUtc></StartTime><FrequencyChanges><FrequencyChange><Frequency dt:dt="r8">10000000</Frequency><Timestamp dt:dt="r8">305379635201</Timestamp><Current dt:dt…	60.005	1.0.0.33	1	438939341	2.0.10.182	12-20-2021	2021-12-20 08:40:27	16:40:27	2.0.10.92	1	affpro	WordList	1	1	1	169	NULL		NULL	NULL	NULL	NULL	NULL	NULL	NULL	9	NULL	NULL	NULL	NULL	NULL	NULL	pra4	taskList2	转基因大豆+科学的	NULL	NULL	NULL	NULL	NULL	NULL	NULL	NULL	NULL	NULL	NULL
大创GO-NOGO	1	2	<?xml version="1.0"?>\n<Clock xmlns:dt="urn:schemas-microsoft-com:datatypes"><Description dt:dt="string">E-Prime Primary Realtime Clock</Description><StartTime><Timestamp dt:dt="int">0</Timestamp><DateUtc dt:dt="string">2021-12-20T08:40:27Z</DateUtc></StartTime><FrequencyChanges><FrequencyChange><Frequency dt:dt="r8">10000000</Frequency><Timestamp dt:dt="r8">305379635201</Timestamp><Current dt:dt…	60.005	1.0.0.33	1	438939341	2.0.10.182	12-20-2021	2021-12-20 08:40:27	16:40:27	2.0.10.92	1	affpro	WordList	1	1	1	170	NULL		NULL	NULL	NULL	NULL	NULL	NULL	NULL	14	NULL	NULL	NULL	NULL	NULL	NULL	pra4	taskList2	动物转基因+高产的	NULL	NULL	NULL	NULL	NULL	NULL	NULL	NULL	NULL	NULL	NULL
大创GO-NOGO	1	2	<?xml version="1.0"?>\n<Clock xmlns:dt="urn:schemas-microsoft-com:datatypes"><Description dt:dt="string">E-Prime Primary Realtime Clock</Description><StartTime><Timestamp dt:dt="int">0</Timestamp><DateUtc dt:dt="string">2021-12-20T08:40:27Z</DateUtc></StartTime><FrequencyChanges><FrequencyChange><Frequency dt:dt="r8">10000000</Frequency><Timestamp dt:dt="r8">305379635201</Timestamp><Current dt:dt…	60.005	1.0.0.33	1	438939341	2.0.10.182	12-20-2021	2021-12-20 08:40:27	16:40:27	2.0.10.92	1	affpro	WordList	1	1	1	171	NULL	j	NULL	NULL	NULL	7	NULL	NULL	NULL	NULL	NULL	NULL	NULL	NULL	NULL	NULL	pra4	taskList2	抗虫害棉花+非天然的	NULL	NULL	NULL	NULL	NULL	NULL	NULL	NULL	NULL	NULL	NULL
大创GO-NOGO	1	2	<?xml version="1.0"?>\n<Clock xmlns:dt="urn:schemas-microsoft-com:datatypes"><Description dt:dt="string">E-Prime Primary Realtime Clock</Description><StartTime><Timestamp dt:dt="int">0</Timestamp><DateUtc dt:dt="string">2021-12-20T08:40:27Z</DateUtc></StartTime><FrequencyChanges><FrequencyChange><Frequency dt:dt="r8">10000000</Frequency><Timestamp dt:dt="r8">305379635201</Timestamp><Current dt:dt…	60.005	1.0.0.33	1	438939341	2.0.10.182	12-20-2021	2021-12-20 08:40:27	16:40:27	2.0.10.92	1	affpro	WordList	1	1	1	172	NULL	j	NULL	NULL	NULL	2	NULL	NULL	NULL	NULL	NULL	NULL	NULL	NULL	NULL	NULL	pra4	taskList2	转基因食物+高风险的	NULL	NULL	NULL	NULL	NULL	NULL	NULL	NULL	NULL	NULL	NULL
大创GO-NOGO	1	2	<?xml version="1.0"?>\n<Clock xmlns:dt="urn:schemas-microsoft-com:datatypes"><Description dt:dt="string">E-Prime Primary Realtime Clock</Description><StartTime><Timestamp dt:dt="int">0</Timestamp><DateUtc dt:dt="string">2021-12-20T08:40:27Z</DateUtc></StartTime><FrequencyChanges><FrequencyChange><Frequency dt:dt="r8">10000000</Frequency><Timestamp dt:dt="r8">305379635201</Timestamp><Current dt:dt…	60.005	1.0.0.33	1	438939341	2.0.10.182	12-20-2021	2021-12-20 08:40:27	16:40:27	2.0.10.92	1	affpro	WordList	1	1	1	173	NULL	j	NULL	NULL	NULL	9	NULL	NULL	NULL	NULL	NULL	NULL	NULL	NULL	NULL	NULL	pra4	taskList2	转基因大豆+不成熟的	NULL	NULL	NULL	NULL	NULL	NULL	NULL	NULL	NULL	NULL	NULL
大创GO-NOGO	1	2	<?xml version="1.0"?>\n<Clock xmlns:dt="urn:schemas-microsoft-com:datatypes"><Description dt:dt="string">E-Prime Primary Realtime Clock</Description><StartTime><Timestamp dt:dt="int">0</Timestamp><DateUtc dt:dt="string">2021-12-20T08:40:27Z</DateUtc></StartTime><FrequencyChanges><FrequencyChange><Frequency dt:dt="r8">10000000</Frequency><Timestamp dt:dt="r8">305379635201</Timestamp><Current dt:dt…	60.005	1.0.0.33	1	438939341	2.0.10.182	12-20-2021	2021-12-20 08:40:27	16:40:27	2.0.10.92	1	affpro	WordList	1	1	1	174	NULL		NULL	NULL	NULL	NULL	NULL	NULL	NULL	3	NULL	NULL	NULL	NULL	NULL	NULL	pra4	taskList2	转基因食物+高科技的	NULL	NULL	NULL	NULL	NULL	NULL	NULL	NULL	NULL	NULL	NULL
大创GO-NOGO	1	2	<?xml version="1.0"?>\n<Clock xmlns:dt="urn:schemas-microsoft-com:datatypes"><Description dt:dt="string">E-Prime Primary Realtime Clock</Description><StartTime><Timestamp dt:dt="int">0</Timestamp><DateUtc dt:dt="string">2021-12-20T08:40:27Z</DateUtc></StartTime><FrequencyChanges><FrequencyChange><Frequency dt:dt="r8">10000000</Frequency><Timestamp dt:dt="r8">305379635201</Timestamp><Current dt:dt…	60.005	1.0.0.33	1	438939341	2.0.10.182	12-20-2021	2021-12-20 08:40:27	16:40:27	2.0.10.92	1	affpro	WordList	1	1	1	175	NULL		NULL	NULL	NULL	NULL	NULL	NULL	NULL	7	NULL	NULL	NULL	NULL	NULL	NULL	pra4	taskList2	抗虫害棉花+高科技的	NULL	NULL	NULL	NULL	NULL	NULL	NULL	NULL	NULL	NULL	NULL
大创GO-NOGO	1	2	<?xml version="1.0"?>\n<Clock xmlns:dt="urn:schemas-microsoft-com:datatypes"><Description dt:dt="string">E-Prime Primary Realtime Clock</Description><StartTime><Timestamp dt:dt="int">0</Timestamp><DateUtc dt:dt="string">2021-12-20T08:40:27Z</DateUtc></StartTime><FrequencyChanges><FrequencyChange><Frequency dt:dt="r8">10000000</Frequency><Timestamp dt:dt="r8">305379635201</Timestamp><Current dt:dt…	60.005	1.0.0.33	1	438939341	2.0.10.182	12-20-2021	2021-12-20 08:40:27	16:40:27	2.0.10.92	1	affpro	WordList	1	1	1	176	NULL		NULL	NULL	NULL	NULL	NULL	NULL	NULL	5	NULL	NULL	NULL	NULL	NULL	NULL	pra4	taskList2	抗虫害棉花+科学的	NULL	NULL	NULL	NULL	NULL	NULL	NULL	NULL	NULL	NULL	NULL
大创GO-NOGO	1	2	<?xml version="1.0"?>\n<Clock xmlns:dt="urn:schemas-microsoft-com:datatypes"><Description dt:dt="string">E-Prime Primary Realtime Clock</Description><StartTime><Timestamp dt:dt="int">0</Timestamp><DateUtc dt:dt="string">2021-12-20T08:40:27Z</DateUtc></StartTime><FrequencyChanges><FrequencyChange><Frequency dt:dt="r8">10000000</Frequency><Timestamp dt:dt="r8">305379635201</Timestamp><Current dt:dt…	60.005	1.0.0.33	1	438939341	2.0.10.182	12-20-2021	2021-12-20 08:40:27	16:40:27	2.0.10.92	1	affpro	WordList	1	1	1	177	NULL		NULL	NULL	NULL	NULL	NULL	NULL	NULL	11	NULL	NULL	NULL	NULL	NULL	NULL	pra4	taskList2	转基因大豆+高科技的	NULL	NULL	NULL	NULL	NULL	NULL	NULL	NULL	NULL	NULL	NULL
大创GO-NOGO	1	2	<?xml version="1.0"?>\n<Clock xmlns:dt="urn:schemas-microsoft-com:datatypes"><Description dt:dt="string">E-Prime Primary Realtime Clock</Description><StartTime><Timestamp dt:dt="int">0</Timestamp><DateUtc dt:dt="string">2021-12-20T08:40:27Z</DateUtc></StartTime><FrequencyChanges><FrequencyChange><Frequency dt:dt="r8">10000000</Frequency><Timestamp dt:dt="r8">305379635201</Timestamp><Current dt:dt…	60.005	1.0.0.33	1	438939341	2.0.10.182	12-20-2021	2021-12-20 08:40:27	16:40:27	2.0.10.92	1	affpro	WordList	1	1	1	178	NULL	j	NULL	NULL	NULL	3	NULL	NULL	NULL	NULL	NULL	NULL	NULL	NULL	NULL	NULL	pra4	taskList2	转基因食物+非天然的	NULL	NULL	NULL	NULL	NULL	NULL	NULL	NULL	NULL	NULL	NULL
大创GO-NOGO	1	2	<?xml version="1.0"?>\n<Clock xmlns:dt="urn:schemas-microsoft-com:datatypes"><Description dt:dt="string">E-Prime Primary Realtime Clock</Description><StartTime><Timestamp dt:dt="int">0</Timestamp><DateUtc dt:dt="string">2021-12-20T08:40:27Z</DateUtc></StartTime><FrequencyChanges><FrequencyChange><Frequency dt:dt="r8">10000000</Frequency><Timestamp dt:dt="r8">305379635201</Timestamp><Current dt:dt…	60.005	1.0.0.33	1	438939341	2.0.10.182	12-20-2021	2021-12-20 08:40:27	16:40:27	2.0.10.92	1	affpro	WordList	1	1	1	179	NULL		NULL	NULL	NULL	NULL	NULL	NULL	NULL	13	NULL	NULL	NULL	NULL	NULL	NULL	pra4	taskList2	动物转基因+科学的	NULL	NULL	NULL	NULL	NULL	NULL	NULL	NULL	NULL	NULL	NULL
大创GO-NOGO	1	2	<?xml version="1.0"?>\n<Clock xmlns:dt="urn:schemas-microsoft-com:datatypes"><Description dt:dt="string">E-Prime Primary Realtime Clock</Description><StartTime><Timestamp dt:dt="int">0</Timestamp><DateUtc dt:dt="string">2021-12-20T08:40:27Z</DateUtc></StartTime><FrequencyChanges><FrequencyChange><Frequency dt:dt="r8">10000000</Frequency><Timestamp dt:dt="r8">305379635201</Timestamp><Current dt:dt…	60.005	1.0.0.33	1	438939341	2.0.10.182	12-20-2021	2021-12-20 08:40:27	16:40:27	2.0.10.92	1	affpro	WordList	1	1	1	180	NULL		NULL	NULL	NULL	NULL	NULL	NULL	NULL	2	NULL	NULL	NULL	NULL	NULL	NULL	pra4	taskList2	转基因食物+高产的	NULL	NULL	NULL	NULL	NULL	NULL	NULL	NULL	NULL	NULL	NULL
大创GO-NOGO	1	2	<?xml version="1.0"?>\n<Clock xmlns:dt="urn:schemas-microsoft-com:datatypes"><Description dt:dt="string">E-Prime Primary Realtime Clock</Description><StartTime><Timestamp dt:dt="int">0</Timestamp><DateUtc dt:dt="string">2021-12-20T08:40:27Z</DateUtc></StartTime><FrequencyChanges><FrequencyChange><Frequency dt:dt="r8">10000000</Frequency><Timestamp dt:dt="r8">305379635201</Timestamp><Current dt:dt…	60.005	1.0.0.33	1	438939341	2.0.10.182	12-20-2021	2021-12-20 08:40:27	16:40:27	2.0.10.92	1	affpro	WordList	1	1	1	181	NULL		NULL	NULL	NULL	NULL	NULL	NULL	NULL	16	NULL	NULL	NULL	NULL	NULL	NULL	pra4	taskList2	动物转基因+创新的	NULL	NULL	NULL	NULL	NULL	NULL	NULL	NULL	NULL	NULL	NULL
大创GO-NOGO	1	2	<?xml version="1.0"?>\n<Clock xmlns:dt="urn:schemas-microsoft-com:datatypes"><Description dt:dt="string">E-Prime Primary Realtime Clock</Description><StartTime><Timestamp dt:dt="int">0</Timestamp><DateUtc dt:dt="string">2021-12-20T08:40:27Z</DateUtc></StartTime><FrequencyChanges><FrequencyChange><Frequency dt:dt="r8">10000000</Frequency><Timestamp dt:dt="r8">305379635201</Timestamp><Current dt:dt…	60.005	1.0.0.33	1	438939341	2.0.10.182	12-20-2021	2021-12-20 08:40:27	16:40:27	2.0.10.92	1	affpro	WordList	1	1	1	182	NULL		NULL	NULL	NULL	NULL	NULL	NULL	NULL	1	NULL	NULL	NULL	NULL	NULL	NULL	pra4	taskList2	转基因食物+科学的	NULL	NULL	NULL	NULL	NULL	NULL	NULL	NULL	NULL	NULL	NULL
大创GO-NOGO	1	2	<?xml version="1.0"?>\n<Clock xmlns:dt="urn:schemas-microsoft-com:datatypes"><Description dt:dt="string">E-Prime Primary Realtime Clock</Description><StartTime><Timestamp dt:dt="int">0</Timestamp><DateUtc dt:dt="string">2021-12-20T08:40:27Z</DateUtc></StartTime><FrequencyChanges><FrequencyChange><Frequency dt:dt="r8">10000000</Frequency><Timestamp dt:dt="r8">305379635201</Timestamp><Current dt:dt…	60.005	1.0.0.33	1	438939341	2.0.10.182	12-20-2021	2021-12-20 08:40:27	16:40:27	2.0.10.92	1	affpro	WordList	1	1	1	183	NULL		NULL	NULL	NULL	NULL	NULL	NULL	NULL	15	NULL	NULL	NULL	NULL	NULL	NULL	pra4	taskList2	动物转基因+高科技的	NULL	NULL	NULL	NULL	NULL	NULL	NULL	NULL	NULL	NULL	NULL
大创GO-NOGO	1	2	<?xml version="1.0"?>\n<Clock xmlns:dt="urn:schemas-microsoft-com:datatypes"><Description dt:dt="string">E-Prime Primary Realtime Clock</Description><StartTime><Timestamp dt:dt="int">0</Timestamp><DateUtc dt:dt="string">2021-12-20T08:40:27Z</DateUtc></StartTime><FrequencyChanges><FrequencyChange><Frequency dt:dt="r8">10000000</Frequency><Timestamp dt:dt="r8">305379635201</Timestamp><Current dt:dt…	60.005	1.0.0.33	1	438939341	2.0.10.182	12-20-2021	2021-12-20 08:40:27	16:40:27	2.0.10.92	1	affpro	WordList	1	1	1	184	NULL	j	NULL	NULL	NULL	8	NULL	NULL	NULL	NULL	NULL	NULL	NULL	NULL	NULL	NULL	pra4	taskList2	抗虫害棉花+有争议的	NULL	NULL	NULL	NULL	NULL	NULL	NULL	NULL	NULL	NULL	NULL
大创GO-NOGO	1	2	<?xml version="1.0"?>\n<Clock xmlns:dt="urn:schemas-microsoft-com:datatypes"><Description dt:dt="string">E-Prime Primary Realtime Clock</Description><StartTime><Timestamp dt:dt="int">0</Timestamp><DateUtc dt:dt="string">2021-12-20T08:40:27Z</DateUtc></StartTime><FrequencyChanges><FrequencyChange><Frequency dt:dt="r8">10000000</Frequency><Timestamp dt:dt="r8">305379635201</Timestamp><Current dt:dt…	60.005	1.0.0.33	1	438939341	2.0.10.182	12-20-2021	2021-12-20 08:40:27	16:40:27	2.0.10.92	1	affpro	WordList	1	1	1	185	NULL		NULL	NULL	NULL	NULL	NULL	NULL	NULL	10	NULL	NULL	NULL	NULL	NULL	NULL	pra4	taskList2	转基因大豆+高产的	NULL	NULL	NULL	NULL	NULL	NULL	NULL	NULL	NULL	NULL	NULL
大创GO-NOGO	1	2	<?xml version="1.0"?>\n<Clock xmlns:dt="urn:schemas-microsoft-com:datatypes"><Description dt:dt="string">E-Prime Primary Realtime Clock</Description><StartTime><Timestamp dt:dt="int">0</Timestamp><DateUtc dt:dt="string">2021-12-20T08:40:27Z</DateUtc></StartTime><FrequencyChanges><FrequencyChange><Frequency dt:dt="r8">10000000</Frequency><Timestamp dt:dt="r8">305379635201</Timestamp><Current dt:dt…	60.005	1.0.0.33	1	438939341	2.0.10.182	12-20-2021	2021-12-20 08:40:27	16:40:27	2.0.10.92	1	affpro	WordList	1	1	1	186	NULL	j	NULL	NULL	NULL	6	NULL	NULL	NULL	NULL	NULL	NULL	NULL	NULL	NULL	NULL	pra4	taskList2	抗虫害棉花+高风险的	NULL	NULL	NULL	NULL	NULL	NULL	NULL	NULL	NULL	NULL	NULL
大创GO-NOGO	1	2	<?xml version="1.0"?>\n<Clock xmlns:dt="urn:schemas-microsoft-com:datatypes"><Description dt:dt="string">E-Prime Primary Realtime Clock</Description><StartTime><Timestamp dt:dt="int">0</Timestamp><DateUtc dt:dt="string">2021-12-20T08:40:27Z</DateUtc></StartTime><FrequencyChanges><FrequencyChange><Frequency dt:dt="r8">10000000</Frequency><Timestamp dt:dt="r8">305379635201</Timestamp><Current dt:dt…	60.005	1.0.0.33	1	438939341	2.0.10.182	12-20-2021	2021-12-20 08:40:27	16:40:27	2.0.10.92	1	affpro	WordList	1	1	1	187	NULL	j	NULL	NULL	NULL	16	NULL	NULL	NULL	NULL	NULL	NULL	NULL	NULL	NULL	NULL	pra4	taskList2	动物转基因+有争议的	NULL	NULL	NULL	NULL	NULL	NULL	NULL	NULL	NULL	NULL	NULL
大创GO-NOGO	1	2	<?xml version="1.0"?>\n<Clock xmlns:dt="urn:schemas-microsoft-com:datatypes"><Description dt:dt="string">E-Prime Primary Realtime Clock</Description><StartTime><Timestamp dt:dt="int">0</Timestamp><DateUtc dt:dt="string">2021-12-20T08:40:27Z</DateUtc></StartTime><FrequencyChanges><FrequencyChange><Frequency dt:dt="r8">10000000</Frequency><Timestamp dt:dt="r8">305379635201</Timestamp><Current dt:dt…	60.005	1.0.0.33	1	438939341	2.0.10.182	12-20-2021	2021-12-20 08:40:27	16:40:27	2.0.10.92	1	affpro	WordList	1	1	1	188	NULL		NULL	NULL	NULL	NULL	NULL	NULL	NULL	14	NULL	NULL	NULL	NULL	NULL	NULL	pra4	taskList2	动物转基因+高产的	NULL	NULL	NULL	NULL	NULL	NULL	NULL	NULL	NULL	NULL	NULL
大创GO-NOGO	1	3	<?xml version="1.0"?>\n<Clock xmlns:dt="urn:schemas-microsoft-com:datatypes"><Description dt:dt="string">E-Prime Primary Realtime Clock</Description><StartTime><Timestamp dt:dt="int">0</Timestamp><DateUtc dt:dt="string">2021-12-17T08:21:57Z</DateUtc></StartTime><FrequencyChanges><FrequencyChange><Frequency dt:dt="r8">10000000</Frequency><Timestamp dt:dt="r8">821279709133</Timestamp><Current dt:dt…	60	1.0.0.33	1	941658464	2.0.10.182	12-17-2021	2021-12-17 08:21:57	16:21:57	2.0.10.92	1	affpro	WordList	1	1	1	1		NULL	7	NULL	NULL	NULL	NULL	NULL	NULL	NULL	2	1	1	NULL	NULL	NULL	pra1	practiceList1	抗虫害棉花+非天然的	1		0	0	88514	1049		0	0	NULL	NULL
大创GO-NOGO	1	3	<?xml version="1.0"?>\n<Clock xmlns:dt="urn:schemas-microsoft-com:datatypes"><Description dt:dt="string">E-Prime Primary Realtime Clock</Description><StartTime><Timestamp dt:dt="int">0</Timestamp><DateUtc dt:dt="string">2021-12-17T08:21:57Z</DateUtc></StartTime><FrequencyChanges><FrequencyChange><Frequency dt:dt="r8">10000000</Frequency><Timestamp dt:dt="r8">821279709133</Timestamp><Current dt:dt…	60	1.0.0.33	1	941658464	2.0.10.182	12-17-2021	2021-12-17 08:21:57	16:21:57	2.0.10.92	1	affpro	WordList	1	1	1	2		NULL	11	NULL	NULL	NULL	NULL	NULL	NULL	NULL	2	1	2	NULL	NULL	NULL	pra1	practiceList1	转基因大豆+非天然的	1		0	0	90280	1017		0	0	NULL	NULL
大创GO-NOGO	1	3	<?xml version="1.0"?>\n<Clock xmlns:dt="urn:schemas-microsoft-com:datatypes"><Description dt:dt="string">E-Prime Primary Realtime Clock</Description><StartTime><Timestamp dt:dt="int">0</Timestamp><DateUtc dt:dt="string">2021-12-17T08:21:57Z</DateUtc></StartTime><FrequencyChanges><FrequencyChange><Frequency dt:dt="r8">10000000</Frequency><Timestamp dt:dt="r8">821279709133</Timestamp><Current dt:dt…	60	1.0.0.33	1	941658464	2.0.10.182	12-17-2021	2021-12-17 08:21:57	16:21:57	2.0.10.92	1	affpro	WordList	1	1	1	3	f	NULL	NULL	NULL	NULL	NULL	9	NULL	NULL	NULL	1	2	3	NULL	NULL	NULL	pra1	practiceList1	转基因大豆+科学的	1	f	1	0	92013	0	f	585	92598	NULL	NULL
大创GO-NOGO	1	3	<?xml version="1.0"?>\n<Clock xmlns:dt="urn:schemas-microsoft-com:datatypes"><Description dt:dt="string">E-Prime Primary Realtime Clock</Description><StartTime><Timestamp dt:dt="int">0</Timestamp><DateUtc dt:dt="string">2021-12-17T08:21:57Z</DateUtc></StartTime><FrequencyChanges><FrequencyChange><Frequency dt:dt="r8">10000000</Frequency><Timestamp dt:dt="r8">821279709133</Timestamp><Current dt:dt…	60	1.0.0.33	1	941658464	2.0.10.182	12-17-2021	2021-12-17 08:21:57	16:21:57	2.0.10.92	1	affpro	WordList	1	1	1	4	f	NULL	NULL	NULL	NULL	NULL	5	NULL	NULL	NULL	1	2	4	NULL	NULL	NULL	pra1	practiceList1	抗虫害棉花+科学的	1	f	1	0	93430	0	f	526	93956	NULL	NULL
大创GO-NOGO	1	3	<?xml version="1.0"?>\n<Clock xmlns:dt="urn:schemas-microsoft-com:datatypes"><Description dt:dt="string">E-Prime Primary Realtime Clock</Description><StartTime><Timestamp dt:dt="int">0</Timestamp><DateUtc dt:dt="string">2021-12-17T08:21:57Z</DateUtc></StartTime><FrequencyChanges><FrequencyChange><Frequency dt:dt="r8">10000000</Frequency><Timestamp dt:dt="r8">821279709133</Timestamp><Current dt:dt…	60	1.0.0.33	1	941658464	2.0.10.182	12-17-2021	2021-12-17 08:21:57	16:21:57	2.0.10.92	1	affpro	WordList	1	1	1	5	f	NULL	NULL	NULL	NULL	NULL	8	NULL	NULL	NULL	1	3	5	NULL	NULL	NULL	pra1	practiceList1	抗虫害棉花+创新的	1	f	0	0	94697	0	f	623	95320	NULL	NULL
大创GO-NOGO	1	3	<?xml version="1.0"?>\n<Clock xmlns:dt="urn:schemas-microsoft-com:datatypes"><Description dt:dt="string">E-Prime Primary Realtime Clock</Description><StartTime><Timestamp dt:dt="int">0</Timestamp><DateUtc dt:dt="string">2021-12-17T08:21:57Z</DateUtc></StartTime><FrequencyChanges><FrequencyChange><Frequency dt:dt="r8">10000000</Frequency><Timestamp dt:dt="r8">821279709133</Timestamp><Current dt:dt…	60	1.0.0.33	1	941658464	2.0.10.182	12-17-2021	2021-12-17 08:21:57	16:21:57	2.0.10.92	1	affpro	WordList	1	1	1	6	f	NULL	NULL	NULL	NULL	NULL	10	NULL	NULL	NULL	1	3	6	NULL	NULL	NULL	pra1	practiceList1	转基因大豆+高产的	1	f	1	0	96063	0	f	455	96518	NULL	NULL
大创GO-NOGO	1	3	<?xml version="1.0"?>\n<Clock xmlns:dt="urn:schemas-microsoft-com:datatypes"><Description dt:dt="string">E-Prime Primary Realtime Clock</Description><StartTime><Timestamp dt:dt="int">0</Timestamp><DateUtc dt:dt="string">2021-12-17T08:21:57Z</DateUtc></StartTime><FrequencyChanges><FrequencyChange><Frequency dt:dt="r8">10000000</Frequency><Timestamp dt:dt="r8">821279709133</Timestamp><Current dt:dt…	60	1.0.0.33	1	941658464	2.0.10.182	12-17-2021	2021-12-17 08:21:57	16:21:57	2.0.10.92	1	affpro	WordList	1	1	1	7	f	NULL	NULL	NULL	NULL	NULL	2	NULL	NULL	NULL	1	4	7	NULL	NULL	NULL	pra1	practiceList1	转基因食物+高产的	1	f	0	0	97247	0	f	386	97633	NULL	NULL
大创GO-NOGO	1	3	<?xml version="1.0"?>\n<Clock xmlns:dt="urn:schemas-microsoft-com:datatypes"><Description dt:dt="string">E-Prime Primary Realtime Clock</Description><StartTime><Timestamp dt:dt="int">0</Timestamp><DateUtc dt:dt="string">2021-12-17T08:21:57Z</DateUtc></StartTime><FrequencyChanges><FrequencyChange><Frequency dt:dt="r8">10000000</Frequency><Timestamp dt:dt="r8">821279709133</Timestamp><Current dt:dt…	60	1.0.0.33	1	941658464	2.0.10.182	12-17-2021	2021-12-17 08:21:57	16:21:57	2.0.10.92	1	affpro	WordList	1	1	1	8	f	NULL	NULL	NULL	NULL	NULL	14	NULL	NULL	NULL	1	4	8	NULL	NULL	NULL	pra1	practiceList1	动物转基因+高产的	1	f	0	0	98363	0	f	327	98690	NULL	NULL
大创GO-NOGO	1	3	<?xml version="1.0"?>\n<Clock xmlns:dt="urn:schemas-microsoft-com:datatypes"><Description dt:dt="string">E-Prime Primary Realtime Clock</Description><StartTime><Timestamp dt:dt="int">0</Timestamp><DateUtc dt:dt="string">2021-12-17T08:21:57Z</DateUtc></StartTime><FrequencyChanges><FrequencyChange><Frequency dt:dt="r8">10000000</Frequency><Timestamp dt:dt="r8">821279709133</Timestamp><Current dt:dt…	60	1.0.0.33	1	941658464	2.0.10.182	12-17-2021	2021-12-17 08:21:57	16:21:57	2.0.10.92	1	affpro	WordList	1	1	1	9		NULL	10	NULL	NULL	NULL	NULL	NULL	NULL	NULL	2	5	9	NULL	NULL	NULL	pra1	practiceList1	转基因大豆+高风险的	1		0	0	99430	1017		0	0	NULL	NULL
大创GO-NOGO	1	3	<?xml version="1.0"?>\n<Clock xmlns:dt="urn:schemas-microsoft-com:datatypes"><Description dt:dt="string">E-Prime Primary Realtime Clock</Description><StartTime><Timestamp dt:dt="int">0</Timestamp><DateUtc dt:dt="string">2021-12-17T08:21:57Z</DateUtc></StartTime><FrequencyChanges><FrequencyChange><Frequency dt:dt="r8">10000000</Frequency><Timestamp dt:dt="r8">821279709133</Timestamp><Current dt:dt…	60	1.0.0.33	1	941658464	2.0.10.182	12-17-2021	2021-12-17 08:21:57	16:21:57	2.0.10.92	1	affpro	WordList	1	1	1	10	f	NULL	NULL	NULL	NULL	NULL	3	NULL	NULL	NULL	1	5	10	NULL	NULL	NULL	pra1	practiceList1	转基因食物+高科技的	1	f	0	0	101163	0	f	509	101672	NULL	NULL
大创GO-NOGO	1	3	<?xml version="1.0"?>\n<Clock xmlns:dt="urn:schemas-microsoft-com:datatypes"><Description dt:dt="string">E-Prime Primary Realtime Clock</Description><StartTime><Timestamp dt:dt="int">0</Timestamp><DateUtc dt:dt="string">2021-12-17T08:21:57Z</DateUtc></StartTime><FrequencyChanges><FrequencyChange><Frequency dt:dt="r8">10000000</Frequency><Timestamp dt:dt="r8">821279709133</Timestamp><Current dt:dt…	60	1.0.0.33	1	941658464	2.0.10.182	12-17-2021	2021-12-17 08:21:57	16:21:57	2.0.10.92	1	affpro	WordList	1	1	1	11	f	NULL	NULL	NULL	NULL	NULL	7	NULL	NULL	NULL	1	6	11	NULL	NULL	NULL	pra1	practiceList1	抗虫害棉花+高科技的	1	f	1	0	102413	0	f	393	102806	NULL	NULL
大创GO-NOGO	1	3	<?xml version="1.0"?>\n<Clock xmlns:dt="urn:schemas-microsoft-com:datatypes"><Description dt:dt="string">E-Prime Primary Realtime Clock</Description><StartTime><Timestamp dt:dt="int">0</Timestamp><DateUtc dt:dt="string">2021-12-17T08:21:57Z</DateUtc></StartTime><FrequencyChanges><FrequencyChange><Frequency dt:dt="r8">10000000</Frequency><Timestamp dt:dt="r8">821279709133</Timestamp><Current dt:dt…	60	1.0.0.33	1	941658464	2.0.10.182	12-17-2021	2021-12-17 08:21:57	16:21:57	2.0.10.92	1	affpro	WordList	1	1	1	12		NULL	12	NULL	NULL	NULL	NULL	NULL	NULL	NULL	2	6	12	NULL	NULL	NULL	pra1	practiceList1	转基因大豆+有争议的	1		0	0	103547	1016		0	0	NULL	NULL
大创GO-NOGO	1	3	<?xml version="1.0"?>\n<Clock xmlns:dt="urn:schemas-microsoft-com:datatypes"><Description dt:dt="string">E-Prime Primary Realtime Clock</Description><StartTime><Timestamp dt:dt="int">0</Timestamp><DateUtc dt:dt="string">2021-12-17T08:21:57Z</DateUtc></StartTime><FrequencyChanges><FrequencyChange><Frequency dt:dt="r8">10000000</Frequency><Timestamp dt:dt="r8">821279709133</Timestamp><Current dt:dt…	60	1.0.0.33	1	941658464	2.0.10.182	12-17-2021	2021-12-17 08:21:57	16:21:57	2.0.10.92	1	affpro	WordList	1	1	1	13	f	NULL	NULL	NULL	NULL	NULL	12	NULL	NULL	NULL	1	7	13	NULL	NULL	NULL	pra1	practiceList1	转基因大豆+创新的	1	f	0	0	105280	0	f	440	105720	NULL	NULL
大创GO-NOGO	1	3	<?xml version="1.0"?>\n<Clock xmlns:dt="urn:schemas-microsoft-com:datatypes"><Description dt:dt="string">E-Prime Primary Realtime Clock</Description><StartTime><Timestamp dt:dt="int">0</Timestamp><DateUtc dt:dt="string">2021-12-17T08:21:57Z</DateUtc></StartTime><FrequencyChanges><FrequencyChange><Frequency dt:dt="r8">10000000</Frequency><Timestamp dt:dt="r8">821279709133</Timestamp><Current dt:dt…	60	1.0.0.33	1	941658464	2.0.10.182	12-17-2021	2021-12-17 08:21:57	16:21:57	2.0.10.92	1	affpro	WordList	1	1	1	14	f	NULL	NULL	NULL	NULL	NULL	13	NULL	NULL	NULL	1	7	14	NULL	NULL	NULL	pra1	practiceList1	动物转基因+科学的	1	f	0	0	106463	0	f	459	106922	NULL	NULL
大创GO-NOGO	1	3	<?xml version="1.0"?>\n<Clock xmlns:dt="urn:schemas-microsoft-com:datatypes"><Description dt:dt="string">E-Prime Primary Realtime Clock</Description><StartTime><Timestamp dt:dt="int">0</Timestamp><DateUtc dt:dt="string">2021-12-17T08:21:57Z</DateUtc></StartTime><FrequencyChanges><FrequencyChange><Frequency dt:dt="r8">10000000</Frequency><Timestamp dt:dt="r8">821279709133</Timestamp><Current dt:dt…	60	1.0.0.33	1	941658464	2.0.10.182	12-17-2021	2021-12-17 08:21:57	16:21:57	2.0.10.92	1	affpro	WordList	1	1	1	15		NULL	4	NULL	NULL	NULL	NULL	NULL	NULL	NULL	2	8	15	NULL	NULL	NULL	pra1	practiceList1	转基因食物+有争议的	0		0	0	107663	0	f	441	108104	NULL	NULL
大创GO-NOGO	1	3	<?xml version="1.0"?>\n<Clock xmlns:dt="urn:schemas-microsoft-com:datatypes"><Description dt:dt="string">E-Prime Primary Realtime Clock</Description><StartTime><Timestamp dt:dt="int">0</Timestamp><DateUtc dt:dt="string">2021-12-17T08:21:57Z</DateUtc></StartTime><FrequencyChanges><FrequencyChange><Frequency dt:dt="r8">10000000</Frequency><Timestamp dt:dt="r8">821279709133</Timestamp><Current dt:dt…	60	1.0.0.33	1	941658464	2.0.10.182	12-17-2021	2021-12-17 08:21:57	16:21:57	2.0.10.92	1	affpro	WordList	1	1	1	16	f	NULL	NULL	NULL	NULL	NULL	15	NULL	NULL	NULL	1	8	16	NULL	NULL	NULL	pra1	practiceList1	动物转基因+高科技的	1	f	0	0	108847	0	f	521	109368	NULL	NULL
大创GO-NOGO	1	3	<?xml version="1.0"?>\n<Clock xmlns:dt="urn:schemas-microsoft-com:datatypes"><Description dt:dt="string">E-Prime Primary Realtime Clock</Description><StartTime><Timestamp dt:dt="int">0</Timestamp><DateUtc dt:dt="string">2021-12-17T08:21:57Z</DateUtc></StartTime><FrequencyChanges><FrequencyChange><Frequency dt:dt="r8">10000000</Frequency><Timestamp dt:dt="r8">821279709133</Timestamp><Current dt:dt…	60	1.0.0.33	1	941658464	2.0.10.182	12-17-2021	2021-12-17 08:21:57	16:21:57	2.0.10.92	1	affpro	WordList	1	1	1	17		NULL	3	NULL	NULL	NULL	NULL	NULL	NULL	NULL	2	9	17	NULL	NULL	NULL	pra1	practiceList1	转基因食物+非天然的	1		1	-1	110096	1017		0	0	NULL	NULL
大创GO-NOGO	1	3	<?xml version="1.0"?>\n<Clock xmlns:dt="urn:schemas-microsoft-com:datatypes"><Description dt:dt="string">E-Prime Primary Realtime Clock</Description><StartTime><Timestamp dt:dt="int">0</Timestamp><DateUtc dt:dt="string">2021-12-17T08:21:57Z</DateUtc></StartTime><FrequencyChanges><FrequencyChange><Frequency dt:dt="r8">10000000</Frequency><Timestamp dt:dt="r8">821279709133</Timestamp><Current dt:dt…	60	1.0.0.33	1	941658464	2.0.10.182	12-17-2021	2021-12-17 08:21:57	16:21:57	2.0.10.92	1	affpro	WordList	1	1	1	18		NULL	2	NULL	NULL	NULL	NULL	NULL	NULL	NULL	2	9	18	NULL	NULL	NULL	pra1	practiceList1	转基因食物+高风险的	0		0	0	111830	0	f	451	112281	NULL	NULL
大创GO-NOGO	1	3	<?xml version="1.0"?>\n<Clock xmlns:dt="urn:schemas-microsoft-com:datatypes"><Description dt:dt="string">E-Prime Primary Realtime Clock</Description><StartTime><Timestamp dt:dt="int">0</Timestamp><DateUtc dt:dt="string">2021-12-17T08:21:57Z</DateUtc></StartTime><FrequencyChanges><FrequencyChange><Frequency dt:dt="r8">10000000</Frequency><Timestamp dt:dt="r8">821279709133</Timestamp><Current dt:dt…	60	1.0.0.33	1	941658464	2.0.10.182	12-17-2021	2021-12-17 08:21:57	16:21:57	2.0.10.92	1	affpro	WordList	1	1	1	19		NULL	16	NULL	NULL	NULL	NULL	NULL	NULL	NULL	2	10	19	NULL	NULL	NULL	pra1	practiceList1	动物转基因+有争议的	1		0	0	113013	1017		0	0	NULL	NULL
大创GO-NOGO	1	3	<?xml version="1.0"?>\n<Clock xmlns:dt="urn:schemas-microsoft-com:datatypes"><Description dt:dt="string">E-Prime Primary Realtime Clock</Description><StartTime><Timestamp dt:dt="int">0</Timestamp><DateUtc dt:dt="string">2021-12-17T08:21:57Z</DateUtc></StartTime><FrequencyChanges><FrequencyChange><Frequency dt:dt="r8">10000000</Frequency><Timestamp dt:dt="r8">821279709133</Timestamp><Current dt:dt…	60	1.0.0.33	1	941658464	2.0.10.182	12-17-2021	2021-12-17 08:21:57	16:21:57	2.0.10.92	1	affpro	WordList	1	1	1	20	f	NULL	NULL	NULL	NULL	NULL	1	NULL	NULL	NULL	1	10	20	NULL	NULL	NULL	pra1	practiceList1	转基因食物+科学的	1	f	1	0	114746	0	f	423	115169	NULL	NULL
大创GO-NOGO	1	3	<?xml version="1.0"?>\n<Clock xmlns:dt="urn:schemas-microsoft-com:datatypes"><Description dt:dt="string">E-Prime Primary Realtime Clock</Description><StartTime><Timestamp dt:dt="int">0</Timestamp><DateUtc dt:dt="string">2021-12-17T08:21:57Z</DateUtc></StartTime><FrequencyChanges><FrequencyChange><Frequency dt:dt="r8">10000000</Frequency><Timestamp dt:dt="r8">821279709133</Timestamp><Current dt:dt…	60	1.0.0.33	1	941658464	2.0.10.182	12-17-2021	2021-12-17 08:21:57	16:21:57	2.0.10.92	1	affpro	WordList	1	1	1	21	f	NULL	NULL	NULL	NULL	NULL	6	NULL	NULL	NULL	1	11	21	NULL	NULL	NULL	pra1	practiceList1	抗虫害棉花+高产的	1	f	0	0	115913	0	f	757	116670	NULL	NULL
大创GO-NOGO	1	3	<?xml version="1.0"?>\n<Clock xmlns:dt="urn:schemas-microsoft-com:datatypes"><Description dt:dt="string">E-Prime Primary Realtime Clock</Description><StartTime><Timestamp dt:dt="int">0</Timestamp><DateUtc dt:dt="string">2021-12-17T08:21:57Z</DateUtc></StartTime><FrequencyChanges><FrequencyChange><Frequency dt:dt="r8">10000000</Frequency><Timestamp dt:dt="r8">821279709133</Timestamp><Current dt:dt…	60	1.0.0.33	1	941658464	2.0.10.182	12-17-2021	2021-12-17 08:21:57	16:21:57	2.0.10.92	1	affpro	WordList	1	1	1	22		NULL	14	NULL	NULL	NULL	NULL	NULL	NULL	NULL	2	11	22	NULL	NULL	NULL	pra1	practiceList1	动物转基因+高风险的	0		0	0	117413	0	f	816	118229	NULL	NULL
大创GO-NOGO	1	3	<?xml version="1.0"?>\n<Clock xmlns:dt="urn:schemas-microsoft-com:datatypes"><Description dt:dt="string">E-Prime Primary Realtime Clock</Description><StartTime><Timestamp dt:dt="int">0</Timestamp><DateUtc dt:dt="string">2021-12-17T08:21:57Z</DateUtc></StartTime><FrequencyChanges><FrequencyChange><Frequency dt:dt="r8">10000000</Frequency><Timestamp dt:dt="r8">821279709133</Timestamp><Current dt:dt…	60	1.0.0.33	1	941658464	2.0.10.182	12-17-2021	2021-12-17 08:21:57	16:21:57	2.0.10.92	1	affpro	WordList	1	1	1	23	f	NULL	NULL	NULL	NULL	NULL	4	NULL	NULL	NULL	1	12	23	NULL	NULL	NULL	pra1	practiceList1	转基因食物+创新的	1	f	0	0	118963	0	f	475	119438	NULL	NULL
大创GO-NOGO	1	3	<?xml version="1.0"?>\n<Clock xmlns:dt="urn:schemas-microsoft-com:datatypes"><Description dt:dt="string">E-Prime Primary Realtime Clock</Description><StartTime><Timestamp dt:dt="int">0</Timestamp><DateUtc dt:dt="string">2021-12-17T08:21:57Z</DateUtc></StartTime><FrequencyChanges><FrequencyChange><Frequency dt:dt="r8">10000000</Frequency><Timestamp dt:dt="r8">821279709133</Timestamp><Current dt:dt…	60	1.0.0.33	1	941658464	2.0.10.182	12-17-2021	2021-12-17 08:21:57	16:21:57	2.0.10.92	1	affpro	WordList	1	1	1	24		NULL	6	NULL	NULL	NULL	NULL	NULL	NULL	NULL	2	12	24	NULL	NULL	NULL	pra1	practiceList1	抗虫害棉花+高风险的	1		0	0	120180	1016		0	0	NULL	NULL
大创GO-NOGO	1	3	<?xml version="1.0"?>\n<Clock xmlns:dt="urn:schemas-microsoft-com:datatypes"><Description dt:dt="string">E-Prime Primary Realtime Clock</Description><StartTime><Timestamp dt:dt="int">0</Timestamp><DateUtc dt:dt="string">2021-12-17T08:21:57Z</DateUtc></StartTime><FrequencyChanges><FrequencyChange><Frequency dt:dt="r8">10000000</Frequency><Timestamp dt:dt="r8">821279709133</Timestamp><Current dt:dt…	60	1.0.0.33	1	941658464	2.0.10.182	12-17-2021	2021-12-17 08:21:57	16:21:57	2.0.10.92	1	affpro	WordList	1	1	1	25		NULL	NULL	10	NULL	NULL	NULL	NULL	NULL	NULL	NULL	NULL	NULL	NULL	NULL	NULL	pra2	taskList1	转基因大豆+高风险的	NULL	NULL	NULL	NULL	NULL	NULL	NULL	NULL	NULL	1
大创GO-NOGO	1	3	<?xml version="1.0"?>\n<Clock xmlns:dt="urn:schemas-microsoft-com:datatypes"><Description dt:dt="string">E-Prime Primary Realtime Clock</Description><StartTime><Timestamp dt:dt="int">0</Timestamp><DateUtc dt:dt="string">2021-12-17T08:21:57Z</DateUtc></StartTime><FrequencyChanges><FrequencyChange><Frequency dt:dt="r8">10000000</Frequency><Timestamp dt:dt="r8">821279709133</Timestamp><Current dt:dt…	60	1.0.0.33	1	941658464	2.0.10.182	12-17-2021	2021-12-17 08:21:57	16:21:57	2.0.10.92	1	affpro	WordList	1	1	1	26	f	NULL	NULL	NULL	NULL	NULL	NULL	13	NULL	NULL	NULL	NULL	NULL	NULL	NULL	NULL	pra2	taskList1	动物转基因+科学的	NULL	NULL	NULL	NULL	NULL	NULL	NULL	NULL	NULL	1	f
大创GO-NOGO	1	3	<?xml version="1.0"?>\n<Clock xmlns:dt="urn:schemas-microsoft-com:datatypes"><Description dt:dt="string">E-Prime Primary Realtime Clock</Description><StartTime><Timestamp dt:dt="int">0</Timestamp><DateUtc dt:dt="string">2021-12-17T08:21:57Z</DateUtc></StartTime><FrequencyChanges><FrequencyChange><Frequency dt:dt="r8">10000000</Frequency><Timestamp dt:dt="r8">821279709133</Timestamp><Current dt:dt…	60	1.0.0.33	1	941658464	2.0.10.182	12-17-2021	2021-12-17 08:21:57	16:21:57	2.0.10.92	1	affpro	WordList	1	1	1	27		NULL	NULL	6	NULL	NULL	NULL	NULL	NULL	NULL	NULL	NULL	NULL	NULL	NULL	NULL	pra2	taskList1	抗虫害棉花+高风险的	NULL	NULL	NULL	NULL	NULL	NULL	NULL	NULL	NULL	1
大创GO-NOGO	1	3	<?xml version="1.0"?>\n<Clock xmlns:dt="urn:schemas-microsoft-com:datatypes"><Description dt:dt="string">E-Prime Primary Realtime Clock</Description><StartTime><Timestamp dt:dt="int">0</Timestamp><DateUtc dt:dt="string">2021-12-17T08:21:57Z</DateUtc></StartTime><FrequencyChanges><FrequencyChange><Frequency dt:dt="r8">10000000</Frequency><Timestamp dt:dt="r8">821279709133</Timestamp><Current dt:dt…	60	1.0.0.33	1	941658464	2.0.10.182	12-17-2021	2021-12-17 08:21:57	16:21:57	2.0.10.92	1	affpro	WordList	1	1	1	28		NULL	NULL	7	NULL	NULL	NULL	NULL	NULL	NULL	NULL	NULL	NULL	NULL	NULL	NULL	pra2	taskList1	抗虫害棉花+非天然的	NULL	NULL	NULL	NULL	NULL	NULL	NULL	NULL	NULL	1
大创GO-NOGO	1	3	<?xml version="1.0"?>\n<Clock xmlns:dt="urn:schemas-microsoft-com:datatypes"><Description dt:dt="string">E-Prime Primary Realtime Clock</Description><StartTime><Timestamp dt:dt="int">0</Timestamp><DateUtc dt:dt="string">2021-12-17T08:21:57Z</DateUtc></StartTime><FrequencyChanges><FrequencyChange><Frequency dt:dt="r8">10000000</Frequency><Timestamp dt:dt="r8">821279709133</Timestamp><Current dt:dt…	60	1.0.0.33	1	941658464	2.0.10.182	12-17-2021	2021-12-17 08:21:57	16:21:57	2.0.10.92	1	affpro	WordList	1	1	1	29		NULL	NULL	3	NULL	NULL	NULL	NULL	NULL	NULL	NULL	NULL	NULL	NULL	NULL	NULL	pra2	taskList1	转基因食物+非天然的	NULL	NULL	NULL	NULL	NULL	NULL	NULL	NULL	NULL	1
大创GO-NOGO	1	3	<?xml version="1.0"?>\n<Clock xmlns:dt="urn:schemas-microsoft-com:datatypes"><Description dt:dt="string">E-Prime Primary Realtime Clock</Description><StartTime><Timestamp dt:dt="int">0</Timestamp><DateUtc dt:dt="string">2021-12-17T08:21:57Z</DateUtc></StartTime><FrequencyChanges><FrequencyChange><Frequency dt:dt="r8">10000000</Frequency><Timestamp dt:dt="r8">821279709133</Timestamp><Current dt:dt…	60	1.0.0.33	1	941658464	2.0.10.182	12-17-2021	2021-12-17 08:21:57	16:21:57	2.0.10.92	1	affpro	WordList	1	1	1	30		NULL	NULL	2	NULL	NULL	NULL	NULL	NULL	NULL	NULL	NULL	NULL	NULL	NULL	NULL	pra2	taskList1	转基因食物+高风险的	NULL	NULL	NULL	NULL	NULL	NULL	NULL	NULL	NULL	1
大创GO-NOGO	1	3	<?xml version="1.0"?>\n<Clock xmlns:dt="urn:schemas-microsoft-com:datatypes"><Description dt:dt="string">E-Prime Primary Realtime Clock</Description><StartTime><Timestamp dt:dt="int">0</Timestamp><DateUtc dt:dt="string">2021-12-17T08:21:57Z</DateUtc></StartTime><FrequencyChanges><FrequencyChange><Frequency dt:dt="r8">10000000</Frequency><Timestamp dt:dt="r8">821279709133</Timestamp><Current dt:dt…	60	1.0.0.33	1	941658464	2.0.10.182	12-17-2021	2021-12-17 08:21:57	16:21:57	2.0.10.92	1	affpro	WordList	1	1	1	31	f	NULL	NULL	NULL	NULL	NULL	NULL	7	NULL	NULL	NULL	NULL	NULL	NULL	NULL	NULL	pra2	taskList1	抗虫害棉花+高科技的	NULL	NULL	NULL	NULL	NULL	NULL	NULL	NULL	NULL	1	f
大创GO-NOGO	1	3	<?xml version="1.0"?>\n<Clock xmlns:dt="urn:schemas-microsoft-com:datatypes"><Description dt:dt="string">E-Prime Primary Realtime Clock</Description><StartTime><Timestamp dt:dt="int">0</Timestamp><DateUtc dt:dt="string">2021-12-17T08:21:57Z</DateUtc></StartTime><FrequencyChanges><FrequencyChange><Frequency dt:dt="r8">10000000</Frequency><Timestamp dt:dt="r8">821279709133</Timestamp><Current dt:dt…	60	1.0.0.33	1	941658464	2.0.10.182	12-17-2021	2021-12-17 08:21:57	16:21:57	2.0.10.92	1	affpro	WordList	1	1	1	32		NULL	NULL	16	NULL	NULL	NULL	NULL	NULL	NULL	NULL	NULL	NULL	NULL	NULL	NULL	pra2	taskList1	动物转基因+有争议的	NULL	NULL	NULL	NULL	NULL	NULL	NULL	NULL	NULL	1
大创GO-NOGO	1	3	<?xml version="1.0"?>\n<Clock xmlns:dt="urn:schemas-microsoft-com:datatypes"><Description dt:dt="string">E-Prime Primary Realtime Clock</Description><StartTime><Timestamp dt:dt="int">0</Timestamp><DateUtc dt:dt="string">2021-12-17T08:21:57Z</DateUtc></StartTime><FrequencyChanges><FrequencyChange><Frequency dt:dt="r8">10000000</Frequency><Timestamp dt:dt="r8">821279709133</Timestamp><Current dt:dt…	60	1.0.0.33	1	941658464	2.0.10.182	12-17-2021	2021-12-17 08:21:57	16:21:57	2.0.10.92	1	affpro	WordList	1	1	1	33	f	NULL	NULL	NULL	NULL	NULL	NULL	3	NULL	NULL	NULL	NULL	NULL	NULL	NULL	NULL	pra2	taskList1	转基因食物+高科技的	NULL	NULL	NULL	NULL	NULL	NULL	NULL	NULL	NULL	1	f
大创GO-NOGO	1	3	<?xml version="1.0"?>\n<Clock xmlns:dt="urn:schemas-microsoft-com:datatypes"><Description dt:dt="string">E-Prime Primary Realtime Clock</Description><StartTime><Timestamp dt:dt="int">0</Timestamp><DateUtc dt:dt="string">2021-12-17T08:21:57Z</DateUtc></StartTime><FrequencyChanges><FrequencyChange><Frequency dt:dt="r8">10000000</Frequency><Timestamp dt:dt="r8">821279709133</Timestamp><Current dt:dt…	60	1.0.0.33	1	941658464	2.0.10.182	12-17-2021	2021-12-17 08:21:57	16:21:57	2.0.10.92	1	affpro	WordList	1	1	1	34	f	NULL	NULL	NULL	NULL	NULL	NULL	10	NULL	NULL	NULL	NULL	NULL	NULL	NULL	NULL	pra2	taskList1	转基因大豆+高产的	NULL	NULL	NULL	NULL	NULL	NULL	NULL	NULL	NULL	1	f
大创GO-NOGO	1	3	<?xml version="1.0"?>\n<Clock xmlns:dt="urn:schemas-microsoft-com:datatypes"><Description dt:dt="string">E-Prime Primary Realtime Clock</Description><StartTime><Timestamp dt:dt="int">0</Timestamp><DateUtc dt:dt="string">2021-12-17T08:21:57Z</DateUtc></StartTime><FrequencyChanges><FrequencyChange><Frequency dt:dt="r8">10000000</Frequency><Timestamp dt:dt="r8">821279709133</Timestamp><Current dt:dt…	60	1.0.0.33	1	941658464	2.0.10.182	12-17-2021	2021-12-17 08:21:57	16:21:57	2.0.10.92	1	affpro	WordList	1	1	1	35	f	NULL	NULL	NULL	NULL	NULL	NULL	14	NULL	NULL	NULL	NULL	NULL	NULL	NULL	NULL	pra2	taskList1	动物转基因+高产的	NULL	NULL	NULL	NULL	NULL	NULL	NULL	NULL	NULL	1	f
大创GO-NOGO	1	3	<?xml version="1.0"?>\n<Clock xmlns:dt="urn:schemas-microsoft-com:datatypes"><Description dt:dt="string">E-Prime Primary Realtime Clock</Description><StartTime><Timestamp dt:dt="int">0</Timestamp><DateUtc dt:dt="string">2021-12-17T08:21:57Z</DateUtc></StartTime><FrequencyChanges><FrequencyChange><Frequency dt:dt="r8">10000000</Frequency><Timestamp dt:dt="r8">821279709133</Timestamp><Current dt:dt…	60	1.0.0.33	1	941658464	2.0.10.182	12-17-2021	2021-12-17 08:21:57	16:21:57	2.0.10.92	1	affpro	WordList	1	1	1	36		NULL	NULL	11	NULL	NULL	NULL	NULL	NULL	NULL	NULL	NULL	NULL	NULL	NULL	NULL	pra2	taskList1	转基因大豆+非天然的	NULL	NULL	NULL	NULL	NULL	NULL	NULL	NULL	NULL	1
大创GO-NOGO	1	3	<?xml version="1.0"?>\n<Clock xmlns:dt="urn:schemas-microsoft-com:datatypes"><Description dt:dt="string">E-Prime Primary Realtime Clock</Description><StartTime><Timestamp dt:dt="int">0</Timestamp><DateUtc dt:dt="string">2021-12-17T08:21:57Z</DateUtc></StartTime><FrequencyChanges><FrequencyChange><Frequency dt:dt="r8">10000000</Frequency><Timestamp dt:dt="r8">821279709133</Timestamp><Current dt:dt…	60	1.0.0.33	1	941658464	2.0.10.182	12-17-2021	2021-12-17 08:21:57	16:21:57	2.0.10.92	1	affpro	WordList	1	1	1	37		NULL	NULL	15	NULL	NULL	NULL	NULL	NULL	NULL	NULL	NULL	NULL	NULL	NULL	NULL	pra2	taskList1	动物转基因+非天然的	NULL	NULL	NULL	NULL	NULL	NULL	NULL	NULL	NULL	1
大创GO-NOGO	1	3	<?xml version="1.0"?>\n<Clock xmlns:dt="urn:schemas-microsoft-com:datatypes"><Description dt:dt="string">E-Prime Primary Realtime Clock</Description><StartTime><Timestamp dt:dt="int">0</Timestamp><DateUtc dt:dt="string">2021-12-17T08:21:57Z</DateUtc></StartTime><FrequencyChanges><FrequencyChange><Frequency dt:dt="r8">10000000</Frequency><Timestamp dt:dt="r8">821279709133</Timestamp><Current dt:dt…	60	1.0.0.33	1	941658464	2.0.10.182	12-17-2021	2021-12-17 08:21:57	16:21:57	2.0.10.92	1	affpro	WordList	1	1	1	38	f	NULL	NULL	NULL	NULL	NULL	NULL	12	NULL	NULL	NULL	NULL	NULL	NULL	NULL	NULL	pra2	taskList1	转基因大豆+创新的	NULL	NULL	NULL	NULL	NULL	NULL	NULL	NULL	NULL	1	f
大创GO-NOGO	1	3	<?xml version="1.0"?>\n<Clock xmlns:dt="urn:schemas-microsoft-com:datatypes"><Description dt:dt="string">E-Prime Primary Realtime Clock</Description><StartTime><Timestamp dt:dt="int">0</Timestamp><DateUtc dt:dt="string">2021-12-17T08:21:57Z</DateUtc></StartTime><FrequencyChanges><FrequencyChange><Frequency dt:dt="r8">10000000</Frequency><Timestamp dt:dt="r8">821279709133</Timestamp><Current dt:dt…	60	1.0.0.33	1	941658464	2.0.10.182	12-17-2021	2021-12-17 08:21:57	16:21:57	2.0.10.92	1	affpro	WordList	1	1	1	39	f	NULL	NULL	NULL	NULL	NULL	NULL	6	NULL	NULL	NULL	NULL	NULL	NULL	NULL	NULL	pra2	taskList1	抗虫害棉花+高产的	NULL	NULL	NULL	NULL	NULL	NULL	NULL	NULL	NULL	1	f
大创GO-NOGO	1	3	<?xml version="1.0"?>\n<Clock xmlns:dt="urn:schemas-microsoft-com:datatypes"><Description dt:dt="string">E-Prime Primary Realtime Clock</Description><StartTime><Timestamp dt:dt="int">0</Timestamp><DateUtc dt:dt="string">2021-12-17T08:21:57Z</DateUtc></StartTime><FrequencyChanges><FrequencyChange><Frequency dt:dt="r8">10000000</Frequency><Timestamp dt:dt="r8">821279709133</Timestamp><Current dt:dt…	60	1.0.0.33	1	941658464	2.0.10.182	12-17-2021	2021-12-17 08:21:57	16:21:57	2.0.10.92	1	affpro	WordList	1	1	1	40	f	NULL	NULL	NULL	NULL	NULL	NULL	9	NULL	NULL	NULL	NULL	NULL	NULL	NULL	NULL	pra2	taskList1	转基因大豆+科学的	NULL	NULL	NULL	NULL	NULL	NULL	NULL	NULL	NULL	1	f
大创GO-NOGO	1	3	<?xml version="1.0"?>\n<Clock xmlns:dt="urn:schemas-microsoft-com:datatypes"><Description dt:dt="string">E-Prime Primary Realtime Clock</Description><StartTime><Timestamp dt:dt="int">0</Timestamp><DateUtc dt:dt="string">2021-12-17T08:21:57Z</DateUtc></StartTime><FrequencyChanges><FrequencyChange><Frequency dt:dt="r8">10000000</Frequency><Timestamp dt:dt="r8">821279709133</Timestamp><Current dt:dt…	60	1.0.0.33	1	941658464	2.0.10.182	12-17-2021	2021-12-17 08:21:57	16:21:57	2.0.10.92	1	affpro	WordList	1	1	1	41	f	NULL	NULL	NULL	NULL	NULL	NULL	1	NULL	NULL	NULL	NULL	NULL	NULL	NULL	NULL	pra2	taskList1	转基因食物+科学的	NULL	NULL	NULL	NULL	NULL	NULL	NULL	NULL	NULL	1	f
大创GO-NOGO	1	3	<?xml version="1.0"?>\n<Clock xmlns:dt="urn:schemas-microsoft-com:datatypes"><Description dt:dt="string">E-Prime Primary Realtime Clock</Description><StartTime><Timestamp dt:dt="int">0</Timestamp><DateUtc dt:dt="string">2021-12-17T08:21:57Z</DateUtc></StartTime><FrequencyChanges><FrequencyChange><Frequency dt:dt="r8">10000000</Frequency><Timestamp dt:dt="r8">821279709133</Timestamp><Current dt:dt…	60	1.0.0.33	1	941658464	2.0.10.182	12-17-2021	2021-12-17 08:21:57	16:21:57	2.0.10.92	1	affpro	WordList	1	1	1	42		NULL	NULL	8	NULL	NULL	NULL	NULL	NULL	NULL	NULL	NULL	NULL	NULL	NULL	NULL	pra2	taskList1	抗虫害棉花+有争议的	NULL	NULL	NULL	NULL	NULL	NULL	NULL	NULL	NULL	1
大创GO-NOGO	1	3	<?xml version="1.0"?>\n<Clock xmlns:dt="urn:schemas-microsoft-com:datatypes"><Description dt:dt="string">E-Prime Primary Realtime Clock</Description><StartTime><Timestamp dt:dt="int">0</Timestamp><DateUtc dt:dt="string">2021-12-17T08:21:57Z</DateUtc></StartTime><FrequencyChanges><FrequencyChange><Frequency dt:dt="r8">10000000</Frequency><Timestamp dt:dt="r8">821279709133</Timestamp><Current dt:dt…	60	1.0.0.33	1	941658464	2.0.10.182	12-17-2021	2021-12-17 08:21:57	16:21:57	2.0.10.92	1	affpro	WordList	1	1	1	43	f	NULL	NULL	NULL	NULL	NULL	NULL	5	NULL	NULL	NULL	NULL	NULL	NULL	NULL	NULL	pra2	taskList1	抗虫害棉花+科学的	NULL	NULL	NULL	NULL	NULL	NULL	NULL	NULL	NULL	1	f
大创GO-NOGO	1	3	<?xml version="1.0"?>\n<Clock xmlns:dt="urn:schemas-microsoft-com:datatypes"><Description dt:dt="string">E-Prime Primary Realtime Clock</Description><StartTime><Timestamp dt:dt="int">0</Timestamp><DateUtc dt:dt="string">2021-12-17T08:21:57Z</DateUtc></StartTime><FrequencyChanges><FrequencyChange><Frequency dt:dt="r8">10000000</Frequency><Timestamp dt:dt="r8">821279709133</Timestamp><Current dt:dt…	60	1.0.0.33	1	941658464	2.0.10.182	12-17-2021	2021-12-17 08:21:57	16:21:57	2.0.10.92	1	affpro	WordList	1	1	1	44	f	NULL	NULL	NULL	NULL	NULL	NULL	2	NULL	NULL	NULL	NULL	NULL	NULL	NULL	NULL	pra2	taskList1	转基因食物+高产的	NULL	NULL	NULL	NULL	NULL	NULL	NULL	NULL	NULL	1	f
大创GO-NOGO	1	3	<?xml version="1.0"?>\n<Clock xmlns:dt="urn:schemas-microsoft-com:datatypes"><Description dt:dt="string">E-Prime Primary Realtime Clock</Description><StartTime><Timestamp dt:dt="int">0</Timestamp><DateUtc dt:dt="string">2021-12-17T08:21:57Z</DateUtc></StartTime><FrequencyChanges><FrequencyChange><Frequency dt:dt="r8">10000000</Frequency><Timestamp dt:dt="r8">821279709133</Timestamp><Current dt:dt…	60	1.0.0.33	1	941658464	2.0.10.182	12-17-2021	2021-12-17 08:21:57	16:21:57	2.0.10.92	1	affpro	WordList	1	1	1	45	f	NULL	NULL	NULL	NULL	NULL	NULL	8	NULL	NULL	NULL	NULL	NULL	NULL	NULL	NULL	pra2	taskList1	抗虫害棉花+创新的	NULL	NULL	NULL	NULL	NULL	NULL	NULL	NULL	NULL	1	f
大创GO-NOGO	1	3	<?xml version="1.0"?>\n<Clock xmlns:dt="urn:schemas-microsoft-com:datatypes"><Description dt:dt="string">E-Prime Primary Realtime Clock</Description><StartTime><Timestamp dt:dt="int">0</Timestamp><DateUtc dt:dt="string">2021-12-17T08:21:57Z</DateUtc></StartTime><FrequencyChanges><FrequencyChange><Frequency dt:dt="r8">10000000</Frequency><Timestamp dt:dt="r8">821279709133</Timestamp><Current dt:dt…	60	1.0.0.33	1	941658464	2.0.10.182	12-17-2021	2021-12-17 08:21:57	16:21:57	2.0.10.92	1	affpro	WordList	1	1	1	46		NULL	NULL	1	NULL	NULL	NULL	NULL	NULL	NULL	NULL	NULL	NULL	NULL	NULL	NULL	pra2	taskList1	转基因食物+不成熟的	NULL	NULL	NULL	NULL	NULL	NULL	NULL	NULL	NULL	1
大创GO-NOGO	1	3	<?xml version="1.0"?>\n<Clock xmlns:dt="urn:schemas-microsoft-com:datatypes"><Description dt:dt="string">E-Prime Primary Realtime Clock</Description><StartTime><Timestamp dt:dt="int">0</Timestamp><DateUtc dt:dt="string">2021-12-17T08:21:57Z</DateUtc></StartTime><FrequencyChanges><FrequencyChange><Frequency dt:dt="r8">10000000</Frequency><Timestamp dt:dt="r8">821279709133</Timestamp><Current dt:dt…	60	1.0.0.33	1	941658464	2.0.10.182	12-17-2021	2021-12-17 08:21:57	16:21:57	2.0.10.92	1	affpro	WordList	1	1	1	47		NULL	NULL	13	NULL	NULL	NULL	NULL	NULL	NULL	NULL	NULL	NULL	NULL	NULL	NULL	pra2	taskList1	动物转基因+不成熟的	NULL	NULL	NULL	NULL	NULL	NULL	NULL	NULL	NULL	1
大创GO-NOGO	1	3	<?xml version="1.0"?>\n<Clock xmlns:dt="urn:schemas-microsoft-com:datatypes"><Description dt:dt="string">E-Prime Primary Realtime Clock</Description><StartTime><Timestamp dt:dt="int">0</Timestamp><DateUtc dt:dt="string">2021-12-17T08:21:57Z</DateUtc></StartTime><FrequencyChanges><FrequencyChange><Frequency dt:dt="r8">10000000</Frequency><Timestamp dt:dt="r8">821279709133</Timestamp><Current dt:dt…	60	1.0.0.33	1	941658464	2.0.10.182	12-17-2021	2021-12-17 08:21:57	16:21:57	2.0.10.92	1	affpro	WordList	1	1	1	48	f	NULL	NULL	NULL	NULL	NULL	NULL	16	NULL	NULL	NULL	NULL	NULL	NULL	NULL	NULL	pra2	taskList1	动物转基因+创新的	NULL	NULL	NULL	NULL	NULL	NULL	NULL	NULL	NULL	1	f
大创GO-NOGO	1	3	<?xml version="1.0"?>\n<Clock xmlns:dt="urn:schemas-microsoft-com:datatypes"><Description dt:dt="string">E-Prime Primary Realtime Clock</Description><StartTime><Timestamp dt:dt="int">0</Timestamp><DateUtc dt:dt="string">2021-12-17T08:21:57Z</DateUtc></StartTime><FrequencyChanges><FrequencyChange><Frequency dt:dt="r8">10000000</Frequency><Timestamp dt:dt="r8">821279709133</Timestamp><Current dt:dt…	60	1.0.0.33	1	941658464	2.0.10.182	12-17-2021	2021-12-17 08:21:57	16:21:57	2.0.10.92	1	affpro	WordList	1	1	1	49	f	NULL	NULL	NULL	NULL	NULL	NULL	15	NULL	NULL	NULL	NULL	NULL	NULL	NULL	NULL	pra2	taskList1	动物转基因+高科技的	NULL	NULL	NULL	NULL	NULL	NULL	NULL	NULL	NULL	1	f
大创GO-NOGO	1	3	<?xml version="1.0"?>\n<Clock xmlns:dt="urn:schemas-microsoft-com:datatypes"><Description dt:dt="string">E-Prime Primary Realtime Clock</Description><StartTime><Timestamp dt:dt="int">0</Timestamp><DateUtc dt:dt="string">2021-12-17T08:21:57Z</DateUtc></StartTime><FrequencyChanges><FrequencyChange><Frequency dt:dt="r8">10000000</Frequency><Timestamp dt:dt="r8">821279709133</Timestamp><Current dt:dt…	60	1.0.0.33	1	941658464	2.0.10.182	12-17-2021	2021-12-17 08:21:57	16:21:57	2.0.10.92	1	affpro	WordList	1	1	1	50	f	NULL	NULL	NULL	NULL	NULL	NULL	11	NULL	NULL	NULL	NULL	NULL	NULL	NULL	NULL	pra2	taskList1	转基因大豆+高科技的	NULL	NULL	NULL	NULL	NULL	NULL	NULL	NULL	NULL	1	f
大创GO-NOGO	1	3	<?xml version="1.0"?>\n<Clock xmlns:dt="urn:schemas-microsoft-com:datatypes"><Description dt:dt="string">E-Prime Primary Realtime Clock</Description><StartTime><Timestamp dt:dt="int">0</Timestamp><DateUtc dt:dt="string">2021-12-17T08:21:57Z</DateUtc></StartTime><FrequencyChanges><FrequencyChange><Frequency dt:dt="r8">10000000</Frequency><Timestamp dt:dt="r8">821279709133</Timestamp><Current dt:dt…	60	1.0.0.33	1	941658464	2.0.10.182	12-17-2021	2021-12-17 08:21:57	16:21:57	2.0.10.92	1	affpro	WordList	1	1	1	51	f	NULL	NULL	NULL	NULL	NULL	NULL	4	NULL	NULL	NULL	NULL	NULL	NULL	NULL	NULL	pra2	taskList1	转基因食物+创新的	NULL	NULL	NULL	NULL	NULL	NULL	NULL	NULL	NULL	1	f
大创GO-NOGO	1	3	<?xml version="1.0"?>\n<Clock xmlns:dt="urn:schemas-microsoft-com:datatypes"><Description dt:dt="string">E-Prime Primary Realtime Clock</Description><StartTime><Timestamp dt:dt="int">0</Timestamp><DateUtc dt:dt="string">2021-12-17T08:21:57Z</DateUtc></StartTime><FrequencyChanges><FrequencyChange><Frequency dt:dt="r8">10000000</Frequency><Timestamp dt:dt="r8">821279709133</Timestamp><Current dt:dt…	60	1.0.0.33	1	941658464	2.0.10.182	12-17-2021	2021-12-17 08:21:57	16:21:57	2.0.10.92	1	affpro	WordList	1	1	1	52		NULL	NULL	4	NULL	NULL	NULL	NULL	NULL	NULL	NULL	NULL	NULL	NULL	NULL	NULL	pra2	taskList1	转基因食物+有争议的	NULL	NULL	NULL	NULL	NULL	NULL	NULL	NULL	NULL	1
大创GO-NOGO	1	3	<?xml version="1.0"?>\n<Clock xmlns:dt="urn:schemas-microsoft-com:datatypes"><Description dt:dt="string">E-Prime Primary Realtime Clock</Description><StartTime><Timestamp dt:dt="int">0</Timestamp><DateUtc dt:dt="string">2021-12-17T08:21:57Z</DateUtc></StartTime><FrequencyChanges><FrequencyChange><Frequency dt:dt="r8">10000000</Frequency><Timestamp dt:dt="r8">821279709133</Timestamp><Current dt:dt…	60	1.0.0.33	1	941658464	2.0.10.182	12-17-2021	2021-12-17 08:21:57	16:21:57	2.0.10.92	1	affpro	WordList	1	1	1	53		NULL	NULL	14	NULL	NULL	NULL	NULL	NULL	NULL	NULL	NULL	NULL	NULL	NULL	NULL	pra2	taskList1	动物转基因+高风险的	NULL	NULL	NULL	NULL	NULL	NULL	NULL	NULL	NULL	1
大创GO-NOGO	1	3	<?xml version="1.0"?>\n<Clock xmlns:dt="urn:schemas-microsoft-com:datatypes"><Description dt:dt="string">E-Prime Primary Realtime Clock</Description><StartTime><Timestamp dt:dt="int">0</Timestamp><DateUtc dt:dt="string">2021-12-17T08:21:57Z</DateUtc></StartTime><FrequencyChanges><FrequencyChange><Frequency dt:dt="r8">10000000</Frequency><Timestamp dt:dt="r8">821279709133</Timestamp><Current dt:dt…	60	1.0.0.33	1	941658464	2.0.10.182	12-17-2021	2021-12-17 08:21:57	16:21:57	2.0.10.92	1	affpro	WordList	1	1	1	54		NULL	NULL	9	NULL	NULL	NULL	NULL	NULL	NULL	NULL	NULL	NULL	NULL	NULL	NULL	pra2	taskList1	转基因大豆+不成熟的	NULL	NULL	NULL	NULL	NULL	NULL	NULL	NULL	NULL	1
大创GO-NOGO	1	3	<?xml version="1.0"?>\n<Clock xmlns:dt="urn:schemas-microsoft-com:datatypes"><Description dt:dt="string">E-Prime Primary Realtime Clock</Description><StartTime><Timestamp dt:dt="int">0</Timestamp><DateUtc dt:dt="string">2021-12-17T08:21:57Z</DateUtc></StartTime><FrequencyChanges><FrequencyChange><Frequency dt:dt="r8">10000000</Frequency><Timestamp dt:dt="r8">821279709133</Timestamp><Current dt:dt…	60	1.0.0.33	1	941658464	2.0.10.182	12-17-2021	2021-12-17 08:21:57	16:21:57	2.0.10.92	1	affpro	WordList	1	1	1	55		NULL	NULL	12	NULL	NULL	NULL	NULL	NULL	NULL	NULL	NULL	NULL	NULL	NULL	NULL	pra2	taskList1	转基因大豆+有争议的	NULL	NULL	NULL	NULL	NULL	NULL	NULL	NULL	NULL	1
大创GO-NOGO	1	3	<?xml version="1.0"?>\n<Clock xmlns:dt="urn:schemas-microsoft-com:datatypes"><Description dt:dt="string">E-Prime Primary Realtime Clock</Description><StartTime><Timestamp dt:dt="int">0</Timestamp><DateUtc dt:dt="string">2021-12-17T08:21:57Z</DateUtc></StartTime><FrequencyChanges><FrequencyChange><Frequency dt:dt="r8">10000000</Frequency><Timestamp dt:dt="r8">821279709133</Timestamp><Current dt:dt…	60	1.0.0.33	1	941658464	2.0.10.182	12-17-2021	2021-12-17 08:21:57	16:21:57	2.0.10.92	1	affpro	WordList	1	1	1	56	f	NULL	NULL	NULL	NULL	NULL	NULL	6	NULL	NULL	NULL	NULL	NULL	NULL	NULL	NULL	pra2	taskList1	抗虫害棉花+高产的	NULL	NULL	NULL	NULL	NULL	NULL	NULL	NULL	NULL	1	f
大创GO-NOGO	1	3	<?xml version="1.0"?>\n<Clock xmlns:dt="urn:schemas-microsoft-com:datatypes"><Description dt:dt="string">E-Prime Primary Realtime Clock</Description><StartTime><Timestamp dt:dt="int">0</Timestamp><DateUtc dt:dt="string">2021-12-17T08:21:57Z</DateUtc></StartTime><FrequencyChanges><FrequencyChange><Frequency dt:dt="r8">10000000</Frequency><Timestamp dt:dt="r8">821279709133</Timestamp><Current dt:dt…	60	1.0.0.33	1	941658464	2.0.10.182	12-17-2021	2021-12-17 08:21:57	16:21:57	2.0.10.92	1	affpro	WordList	1	1	1	57		NULL	NULL	5	NULL	NULL	NULL	NULL	NULL	NULL	NULL	NULL	NULL	NULL	NULL	NULL	pra2	taskList1	抗虫害棉花+不成熟的	NULL	NULL	NULL	NULL	NULL	NULL	NULL	NULL	NULL	1
大创GO-NOGO	1	3	<?xml version="1.0"?>\n<Clock xmlns:dt="urn:schemas-microsoft-com:datatypes"><Description dt:dt="string">E-Prime Primary Realtime Clock</Description><StartTime><Timestamp dt:dt="int">0</Timestamp><DateUtc dt:dt="string">2021-12-17T08:21:57Z</DateUtc></StartTime><FrequencyChanges><FrequencyChange><Frequency dt:dt="r8">10000000</Frequency><Timestamp dt:dt="r8">821279709133</Timestamp><Current dt:dt…	60	1.0.0.33	1	941658464	2.0.10.182	12-17-2021	2021-12-17 08:21:57	16:21:57	2.0.10.92	1	affpro	WordList	1	1	1	58	f	NULL	NULL	NULL	NULL	NULL	NULL	9	NULL	NULL	NULL	NULL	NULL	NULL	NULL	NULL	pra2	taskList1	转基因大豆+科学的	NULL	NULL	NULL	NULL	NULL	NULL	NULL	NULL	NULL	1	f
大创GO-NOGO	1	3	<?xml version="1.0"?>\n<Clock xmlns:dt="urn:schemas-microsoft-com:datatypes"><Description dt:dt="string">E-Prime Primary Realtime Clock</Description><StartTime><Timestamp dt:dt="int">0</Timestamp><DateUtc dt:dt="string">2021-12-17T08:21:57Z</DateUtc></StartTime><FrequencyChanges><FrequencyChange><Frequency dt:dt="r8">10000000</Frequency><Timestamp dt:dt="r8">821279709133</Timestamp><Current dt:dt…	60	1.0.0.33	1	941658464	2.0.10.182	12-17-2021	2021-12-17 08:21:57	16:21:57	2.0.10.92	1	affpro	WordList	1	1	1	59	f	NULL	NULL	NULL	NULL	NULL	NULL	7	NULL	NULL	NULL	NULL	NULL	NULL	NULL	NULL	pra2	taskList1	抗虫害棉花+高科技的	NULL	NULL	NULL	NULL	NULL	NULL	NULL	NULL	NULL	1	f
大创GO-NOGO	1	3	<?xml version="1.0"?>\n<Clock xmlns:dt="urn:schemas-microsoft-com:datatypes"><Description dt:dt="string">E-Prime Primary Realtime Clock</Description><StartTime><Timestamp dt:dt="int">0</Timestamp><DateUtc dt:dt="string">2021-12-17T08:21:57Z</DateUtc></StartTime><FrequencyChanges><FrequencyChange><Frequency dt:dt="r8">10000000</Frequency><Timestamp dt:dt="r8">821279709133</Timestamp><Current dt:dt…	60	1.0.0.33	1	941658464	2.0.10.182	12-17-2021	2021-12-17 08:21:57	16:21:57	2.0.10.92	1	affpro	WordList	1	1	1	60		NULL	NULL	13	NULL	NULL	NULL	NULL	NULL	NULL	NULL	NULL	NULL	NULL	NULL	NULL	pra2	taskList1	动物转基因+不成熟的	NULL	NULL	NULL	NULL	NULL	NULL	NULL	NULL	NULL	1
大创GO-NOGO	1	3	<?xml version="1.0"?>\n<Clock xmlns:dt="urn:schemas-microsoft-com:datatypes"><Description dt:dt="string">E-Prime Primary Realtime Clock</Description><StartTime><Timestamp dt:dt="int">0</Timestamp><DateUtc dt:dt="string">2021-12-17T08:21:57Z</DateUtc></StartTime><FrequencyChanges><FrequencyChange><Frequency dt:dt="r8">10000000</Frequency><Timestamp dt:dt="r8">821279709133</Timestamp><Current dt:dt…	60	1.0.0.33	1	941658464	2.0.10.182	12-17-2021	2021-12-17 08:21:57	16:21:57	2.0.10.92	1	affpro	WordList	1	1	1	61		NULL	NULL	12	NULL	NULL	NULL	NULL	NULL	NULL	NULL	NULL	NULL	NULL	NULL	NULL	pra2	taskList1	转基因大豆+有争议的	NULL	NULL	NULL	NULL	NULL	NULL	NULL	NULL	NULL	1
大创GO-NOGO	1	3	<?xml version="1.0"?>\n<Clock xmlns:dt="urn:schemas-microsoft-com:datatypes"><Description dt:dt="string">E-Prime Primary Realtime Clock</Description><StartTime><Timestamp dt:dt="int">0</Timestamp><DateUtc dt:dt="string">2021-12-17T08:21:57Z</DateUtc></StartTime><FrequencyChanges><FrequencyChange><Frequency dt:dt="r8">10000000</Frequency><Timestamp dt:dt="r8">821279709133</Timestamp><Current dt:dt…	60	1.0.0.33	1	941658464	2.0.10.182	12-17-2021	2021-12-17 08:21:57	16:21:57	2.0.10.92	1	affpro	WordList	1	1	1	62		NULL	NULL	7	NULL	NULL	NULL	NULL	NULL	NULL	NULL	NULL	NULL	NULL	NULL	NULL	pra2	taskList1	抗虫害棉花+非天然的	NULL	NULL	NULL	NULL	NULL	NULL	NULL	NULL	NULL	1
大创GO-NOGO	1	3	<?xml version="1.0"?>\n<Clock xmlns:dt="urn:schemas-microsoft-com:datatypes"><Description dt:dt="string">E-Prime Primary Realtime Clock</Description><StartTime><Timestamp dt:dt="int">0</Timestamp><DateUtc dt:dt="string">2021-12-17T08:21:57Z</DateUtc></StartTime><FrequencyChanges><FrequencyChange><Frequency dt:dt="r8">10000000</Frequency><Timestamp dt:dt="r8">821279709133</Timestamp><Current dt:dt…	60	1.0.0.33	1	941658464	2.0.10.182	12-17-2021	2021-12-17 08:21:57	16:21:57	2.0.10.92	1	affpro	WordList	1	1	1	63		NULL	NULL	11	NULL	NULL	NULL	NULL	NULL	NULL	NULL	NULL	NULL	NULL	NULL	NULL	pra2	taskList1	转基因大豆+非天然的	NULL	NULL	NULL	NULL	NULL	NULL	NULL	NULL	NULL	1
大创GO-NOGO	1	3	<?xml version="1.0"?>\n<Clock xmlns:dt="urn:schemas-microsoft-com:datatypes"><Description dt:dt="string">E-Prime Primary Realtime Clock</Description><StartTime><Timestamp dt:dt="int">0</Timestamp><DateUtc dt:dt="string">2021-12-17T08:21:57Z</DateUtc></StartTime><FrequencyChanges><FrequencyChange><Frequency dt:dt="r8">10000000</Frequency><Timestamp dt:dt="r8">821279709133</Timestamp><Current dt:dt…	60	1.0.0.33	1	941658464	2.0.10.182	12-17-2021	2021-12-17 08:21:57	16:21:57	2.0.10.92	1	affpro	WordList	1	1	1	64	f	NULL	NULL	NULL	NULL	NULL	NULL	1	NULL	NULL	NULL	NULL	NULL	NULL	NULL	NULL	pra2	taskList1	转基因食物+科学的	NULL	NULL	NULL	NULL	NULL	NULL	NULL	NULL	NULL	1	f
大创GO-NOGO	1	3	<?xml version="1.0"?>\n<Clock xmlns:dt="urn:schemas-microsoft-com:datatypes"><Description dt:dt="string">E-Prime Primary Realtime Clock</Description><StartTime><Timestamp dt:dt="int">0</Timestamp><DateUtc dt:dt="string">2021-12-17T08:21:57Z</DateUtc></StartTime><FrequencyChanges><FrequencyChange><Frequency dt:dt="r8">10000000</Frequency><Timestamp dt:dt="r8">821279709133</Timestamp><Current dt:dt…	60	1.0.0.33	1	941658464	2.0.10.182	12-17-2021	2021-12-17 08:21:57	16:21:57	2.0.10.92	1	affpro	WordList	1	1	1	65		NULL	NULL	16	NULL	NULL	NULL	NULL	NULL	NULL	NULL	NULL	NULL	NULL	NULL	NULL	pra2	taskList1	动物转基因+有争议的	NULL	NULL	NULL	NULL	NULL	NULL	NULL	NULL	NULL	1
大创GO-NOGO	1	3	<?xml version="1.0"?>\n<Clock xmlns:dt="urn:schemas-microsoft-com:datatypes"><Description dt:dt="string">E-Prime Primary Realtime Clock</Description><StartTime><Timestamp dt:dt="int">0</Timestamp><DateUtc dt:dt="string">2021-12-17T08:21:57Z</DateUtc></StartTime><FrequencyChanges><FrequencyChange><Frequency dt:dt="r8">10000000</Frequency><Timestamp dt:dt="r8">821279709133</Timestamp><Current dt:dt…	60	1.0.0.33	1	941658464	2.0.10.182	12-17-2021	2021-12-17 08:21:57	16:21:57	2.0.10.92	1	affpro	WordList	1	1	1	66	f	NULL	NULL	NULL	NULL	NULL	NULL	12	NULL	NULL	NULL	NULL	NULL	NULL	NULL	NULL	pra2	taskList1	转基因大豆+创新的	NULL	NULL	NULL	NULL	NULL	NULL	NULL	NULL	NULL	1	f
大创GO-NOGO	1	3	<?xml version="1.0"?>\n<Clock xmlns:dt="urn:schemas-microsoft-com:datatypes"><Description dt:dt="string">E-Prime Primary Realtime Clock</Description><StartTime><Timestamp dt:dt="int">0</Timestamp><DateUtc dt:dt="string">2021-12-17T08:21:57Z</DateUtc></StartTime><FrequencyChanges><FrequencyChange><Frequency dt:dt="r8">10000000</Frequency><Timestamp dt:dt="r8">821279709133</Timestamp><Current dt:dt…	60	1.0.0.33	1	941658464	2.0.10.182	12-17-2021	2021-12-17 08:21:57	16:21:57	2.0.10.92	1	affpro	WordList	1	1	1	67		NULL	NULL	2	NULL	NULL	NULL	NULL	NULL	NULL	NULL	NULL	NULL	NULL	NULL	NULL	pra2	taskList1	转基因食物+高风险的	NULL	NULL	NULL	NULL	NULL	NULL	NULL	NULL	NULL	1
大创GO-NOGO	1	3	<?xml version="1.0"?>\n<Clock xmlns:dt="urn:schemas-microsoft-com:datatypes"><Description dt:dt="string">E-Prime Primary Realtime Clock</Description><StartTime><Timestamp dt:dt="int">0</Timestamp><DateUtc dt:dt="string">2021-12-17T08:21:57Z</DateUtc></StartTime><FrequencyChanges><FrequencyChange><Frequency dt:dt="r8">10000000</Frequency><Timestamp dt:dt="r8">821279709133</Timestamp><Current dt:dt…	60	1.0.0.33	1	941658464	2.0.10.182	12-17-2021	2021-12-17 08:21:57	16:21:57	2.0.10.92	1	affpro	WordList	1	1	1	68	f	NULL	NULL	NULL	NULL	NULL	NULL	10	NULL	NULL	NULL	NULL	NULL	NULL	NULL	NULL	pra2	taskList1	转基因大豆+高产的	NULL	NULL	NULL	NULL	NULL	NULL	NULL	NULL	NULL	1	f
大创GO-NOGO	1	3	<?xml version="1.0"?>\n<Clock xmlns:dt="urn:schemas-microsoft-com:datatypes"><Description dt:dt="string">E-Prime Primary Realtime Clock</Description><StartTime><Timestamp dt:dt="int">0</Timestamp><DateUtc dt:dt="string">2021-12-17T08:21:57Z</DateUtc></StartTime><FrequencyChanges><FrequencyChange><Frequency dt:dt="r8">10000000</Frequency><Timestamp dt:dt="r8">821279709133</Timestamp><Current dt:dt…	60	1.0.0.33	1	941658464	2.0.10.182	12-17-2021	2021-12-17 08:21:57	16:21:57	2.0.10.92	1	affpro	WordList	1	1	1	69	f	NULL	NULL	NULL	NULL	NULL	NULL	11	NULL	NULL	NULL	NULL	NULL	NULL	NULL	NULL	pra2	taskList1	转基因大豆+高科技的	NULL	NULL	NULL	NULL	NULL	NULL	NULL	NULL	NULL	1	f
大创GO-NOGO	1	3	<?xml version="1.0"?>\n<Clock xmlns:dt="urn:schemas-microsoft-com:datatypes"><Description dt:dt="string">E-Prime Primary Realtime Clock</Description><StartTime><Timestamp dt:dt="int">0</Timestamp><DateUtc dt:dt="string">2021-12-17T08:21:57Z</DateUtc></StartTime><FrequencyChanges><FrequencyChange><Frequency dt:dt="r8">10000000</Frequency><Timestamp dt:dt="r8">821279709133</Timestamp><Current dt:dt…	60	1.0.0.33	1	941658464	2.0.10.182	12-17-2021	2021-12-17 08:21:57	16:21:57	2.0.10.92	1	affpro	WordList	1	1	1	70	f	NULL	NULL	NULL	NULL	NULL	NULL	13	NULL	NULL	NULL	NULL	NULL	NULL	NULL	NULL	pra2	taskList1	动物转基因+科学的	NULL	NULL	NULL	NULL	NULL	NULL	NULL	NULL	NULL	1	f
大创GO-NOGO	1	3	<?xml version="1.0"?>\n<Clock xmlns:dt="urn:schemas-microsoft-com:datatypes"><Description dt:dt="string">E-Prime Primary Realtime Clock</Description><StartTime><Timestamp dt:dt="int">0</Timestamp><DateUtc dt:dt="string">2021-12-17T08:21:57Z</DateUtc></StartTime><FrequencyChanges><FrequencyChange><Frequency dt:dt="r8">10000000</Frequency><Timestamp dt:dt="r8">821279709133</Timestamp><Current dt:dt…	60	1.0.0.33	1	941658464	2.0.10.182	12-17-2021	2021-12-17 08:21:57	16:21:57	2.0.10.92	1	affpro	WordList	1	1	1	71	f	NULL	NULL	NULL	NULL	NULL	NULL	5	NULL	NULL	NULL	NULL	NULL	NULL	NULL	NULL	pra2	taskList1	抗虫害棉花+科学的	NULL	NULL	NULL	NULL	NULL	NULL	NULL	NULL	NULL	1	f
大创GO-NOGO	1	3	<?xml version="1.0"?>\n<Clock xmlns:dt="urn:schemas-microsoft-com:datatypes"><Description dt:dt="string">E-Prime Primary Realtime Clock</Description><StartTime><Timestamp dt:dt="int">0</Timestamp><DateUtc dt:dt="string">2021-12-17T08:21:57Z</DateUtc></StartTime><FrequencyChanges><FrequencyChange><Frequency dt:dt="r8">10000000</Frequency><Timestamp dt:dt="r8">821279709133</Timestamp><Current dt:dt…	60	1.0.0.33	1	941658464	2.0.10.182	12-17-2021	2021-12-17 08:21:57	16:21:57	2.0.10.92	1	affpro	WordList	1	1	1	72	f	NULL	NULL	NULL	NULL	NULL	NULL	4	NULL	NULL	NULL	NULL	NULL	NULL	NULL	NULL	pra2	taskList1	转基因食物+创新的	NULL	NULL	NULL	NULL	NULL	NULL	NULL	NULL	NULL	0	f
大创GO-NOGO	1	3	<?xml version="1.0"?>\n<Clock xmlns:dt="urn:schemas-microsoft-com:datatypes"><Description dt:dt="string">E-Prime Primary Realtime Clock</Description><StartTime><Timestamp dt:dt="int">0</Timestamp><DateUtc dt:dt="string">2021-12-17T08:21:57Z</DateUtc></StartTime><FrequencyChanges><FrequencyChange><Frequency dt:dt="r8">10000000</Frequency><Timestamp dt:dt="r8">821279709133</Timestamp><Current dt:dt…	60	1.0.0.33	1	941658464	2.0.10.182	12-17-2021	2021-12-17 08:21:57	16:21:57	2.0.10.92	1	affpro	WordList	1	1	1	73		NULL	NULL	3	NULL	NULL	NULL	NULL	NULL	NULL	NULL	NULL	NULL	NULL	NULL	NULL	pra2	taskList1	转基因食物+非天然的	NULL	NULL	NULL	NULL	NULL	NULL	NULL	NULL	NULL	1
大创GO-NOGO	1	3	<?xml version="1.0"?>\n<Clock xmlns:dt="urn:schemas-microsoft-com:datatypes"><Description dt:dt="string">E-Prime Primary Realtime Clock</Description><StartTime><Timestamp dt:dt="int">0</Timestamp><DateUtc dt:dt="string">2021-12-17T08:21:57Z</DateUtc></StartTime><FrequencyChanges><FrequencyChange><Frequency dt:dt="r8">10000000</Frequency><Timestamp dt:dt="r8">821279709133</Timestamp><Current dt:dt…	60	1.0.0.33	1	941658464	2.0.10.182	12-17-2021	2021-12-17 08:21:57	16:21:57	2.0.10.92	1	affpro	WordList	1	1	1	74	f	NULL	NULL	NULL	NULL	NULL	NULL	2	NULL	NULL	NULL	NULL	NULL	NULL	NULL	NULL	pra2	taskList1	转基因食物+高产的	NULL	NULL	NULL	NULL	NULL	NULL	NULL	NULL	NULL	1	f
大创GO-NOGO	1	3	<?xml version="1.0"?>\n<Clock xmlns:dt="urn:schemas-microsoft-com:datatypes"><Description dt:dt="string">E-Prime Primary Realtime Clock</Description><StartTime><Timestamp dt:dt="int">0</Timestamp><DateUtc dt:dt="string">2021-12-17T08:21:57Z</DateUtc></StartTime><FrequencyChanges><FrequencyChange><Frequency dt:dt="r8">10000000</Frequency><Timestamp dt:dt="r8">821279709133</Timestamp><Current dt:dt…	60	1.0.0.33	1	941658464	2.0.10.182	12-17-2021	2021-12-17 08:21:57	16:21:57	2.0.10.92	1	affpro	WordList	1	1	1	75		NULL	NULL	9	NULL	NULL	NULL	NULL	NULL	NULL	NULL	NULL	NULL	NULL	NULL	NULL	pra2	taskList1	转基因大豆+不成熟的	NULL	NULL	NULL	NULL	NULL	NULL	NULL	NULL	NULL	1
大创GO-NOGO	1	3	<?xml version="1.0"?>\n<Clock xmlns:dt="urn:schemas-microsoft-com:datatypes"><Description dt:dt="string">E-Prime Primary Realtime Clock</Description><StartTime><Timestamp dt:dt="int">0</Timestamp><DateUtc dt:dt="string">2021-12-17T08:21:57Z</DateUtc></StartTime><FrequencyChanges><FrequencyChange><Frequency dt:dt="r8">10000000</Frequency><Timestamp dt:dt="r8">821279709133</Timestamp><Current dt:dt…	60	1.0.0.33	1	941658464	2.0.10.182	12-17-2021	2021-12-17 08:21:57	16:21:57	2.0.10.92	1	affpro	WordList	1	1	1	76		NULL	NULL	5	NULL	NULL	NULL	NULL	NULL	NULL	NULL	NULL	NULL	NULL	NULL	NULL	pra2	taskList1	抗虫害棉花+不成熟的	NULL	NULL	NULL	NULL	NULL	NULL	NULL	NULL	NULL	1
大创GO-NOGO	1	3	<?xml version="1.0"?>\n<Clock xmlns:dt="urn:schemas-microsoft-com:datatypes"><Description dt:dt="string">E-Prime Primary Realtime Clock</Description><StartTime><Timestamp dt:dt="int">0</Timestamp><DateUtc dt:dt="string">2021-12-17T08:21:57Z</DateUtc></StartTime><FrequencyChanges><FrequencyChange><Frequency dt:dt="r8">10000000</Frequency><Timestamp dt:dt="r8">821279709133</Timestamp><Current dt:dt…	60	1.0.0.33	1	941658464	2.0.10.182	12-17-2021	2021-12-17 08:21:57	16:21:57	2.0.10.92	1	affpro	WordList	1	1	1	77		NULL	NULL	1	NULL	NULL	NULL	NULL	NULL	NULL	NULL	NULL	NULL	NULL	NULL	NULL	pra2	taskList1	转基因食物+不成熟的	NULL	NULL	NULL	NULL	NULL	NULL	NULL	NULL	NULL	1
大创GO-NOGO	1	3	<?xml version="1.0"?>\n<Clock xmlns:dt="urn:schemas-microsoft-com:datatypes"><Description dt:dt="string">E-Prime Primary Realtime Clock</Description><StartTime><Timestamp dt:dt="int">0</Timestamp><DateUtc dt:dt="string">2021-12-17T08:21:57Z</DateUtc></StartTime><FrequencyChanges><FrequencyChange><Frequency dt:dt="r8">10000000</Frequency><Timestamp dt:dt="r8">821279709133</Timestamp><Current dt:dt…	60	1.0.0.33	1	941658464	2.0.10.182	12-17-2021	2021-12-17 08:21:57	16:21:57	2.0.10.92	1	affpro	WordList	1	1	1	78	f	NULL	NULL	NULL	NULL	NULL	NULL	14	NULL	NULL	NULL	NULL	NULL	NULL	NULL	NULL	pra2	taskList1	动物转基因+高产的	NULL	NULL	NULL	NULL	NULL	NULL	NULL	NULL	NULL	1	f
大创GO-NOGO	1	3	<?xml version="1.0"?>\n<Clock xmlns:dt="urn:schemas-microsoft-com:datatypes"><Description dt:dt="string">E-Prime Primary Realtime Clock</Description><StartTime><Timestamp dt:dt="int">0</Timestamp><DateUtc dt:dt="string">2021-12-17T08:21:57Z</DateUtc></StartTime><FrequencyChanges><FrequencyChange><Frequency dt:dt="r8">10000000</Frequency><Timestamp dt:dt="r8">821279709133</Timestamp><Current dt:dt…	60	1.0.0.33	1	941658464	2.0.10.182	12-17-2021	2021-12-17 08:21:57	16:21:57	2.0.10.92	1	affpro	WordList	1	1	1	79	f	NULL	NULL	NULL	NULL	NULL	NULL	8	NULL	NULL	NULL	NULL	NULL	NULL	NULL	NULL	pra2	taskList1	抗虫害棉花+创新的	NULL	NULL	NULL	NULL	NULL	NULL	NULL	NULL	NULL	1	f
大创GO-NOGO	1	3	<?xml version="1.0"?>\n<Clock xmlns:dt="urn:schemas-microsoft-com:datatypes"><Description dt:dt="string">E-Prime Primary Realtime Clock</Description><StartTime><Timestamp dt:dt="int">0</Timestamp><DateUtc dt:dt="string">2021-12-17T08:21:57Z</DateUtc></StartTime><FrequencyChanges><FrequencyChange><Frequency dt:dt="r8">10000000</Frequency><Timestamp dt:dt="r8">821279709133</Timestamp><Current dt:dt…	60	1.0.0.33	1	941658464	2.0.10.182	12-17-2021	2021-12-17 08:21:57	16:21:57	2.0.10.92	1	affpro	WordList	1	1	1	80		NULL	NULL	10	NULL	NULL	NULL	NULL	NULL	NULL	NULL	NULL	NULL	NULL	NULL	NULL	pra2	taskList1	转基因大豆+高风险的	NULL	NULL	NULL	NULL	NULL	NULL	NULL	NULL	NULL	1
大创GO-NOGO	1	3	<?xml version="1.0"?>\n<Clock xmlns:dt="urn:schemas-microsoft-com:datatypes"><Description dt:dt="string">E-Prime Primary Realtime Clock</Description><StartTime><Timestamp dt:dt="int">0</Timestamp><DateUtc dt:dt="string">2021-12-17T08:21:57Z</DateUtc></StartTime><FrequencyChanges><FrequencyChange><Frequency dt:dt="r8">10000000</Frequency><Timestamp dt:dt="r8">821279709133</Timestamp><Current dt:dt…	60	1.0.0.33	1	941658464	2.0.10.182	12-17-2021	2021-12-17 08:21:57	16:21:57	2.0.10.92	1	affpro	WordList	1	1	1	81	f	NULL	NULL	NULL	NULL	NULL	NULL	16	NULL	NULL	NULL	NULL	NULL	NULL	NULL	NULL	pra2	taskList1	动物转基因+创新的	NULL	NULL	NULL	NULL	NULL	NULL	NULL	NULL	NULL	1	f
大创GO-NOGO	1	3	<?xml version="1.0"?>\n<Clock xmlns:dt="urn:schemas-microsoft-com:datatypes"><Description dt:dt="string">E-Prime Primary Realtime Clock</Description><StartTime><Timestamp dt:dt="int">0</Timestamp><DateUtc dt:dt="string">2021-12-17T08:21:57Z</DateUtc></StartTime><FrequencyChanges><FrequencyChange><Frequency dt:dt="r8">10000000</Frequency><Timestamp dt:dt="r8">821279709133</Timestamp><Current dt:dt…	60	1.0.0.33	1	941658464	2.0.10.182	12-17-2021	2021-12-17 08:21:57	16:21:57	2.0.10.92	1	affpro	WordList	1	1	1	82		NULL	NULL	6	NULL	NULL	NULL	NULL	NULL	NULL	NULL	NULL	NULL	NULL	NULL	NULL	pra2	taskList1	抗虫害棉花+高风险的	NULL	NULL	NULL	NULL	NULL	NULL	NULL	NULL	NULL	1
大创GO-NOGO	1	3	<?xml version="1.0"?>\n<Clock xmlns:dt="urn:schemas-microsoft-com:datatypes"><Description dt:dt="string">E-Prime Primary Realtime Clock</Description><StartTime><Timestamp dt:dt="int">0</Timestamp><DateUtc dt:dt="string">2021-12-17T08:21:57Z</DateUtc></StartTime><FrequencyChanges><FrequencyChange><Frequency dt:dt="r8">10000000</Frequency><Timestamp dt:dt="r8">821279709133</Timestamp><Current dt:dt…	60	1.0.0.33	1	941658464	2.0.10.182	12-17-2021	2021-12-17 08:21:57	16:21:57	2.0.10.92	1	affpro	WordList	1	1	1	83		NULL	NULL	4	NULL	NULL	NULL	NULL	NULL	NULL	NULL	NULL	NULL	NULL	NULL	NULL	pra2	taskList1	转基因食物+有争议的	NULL	NULL	NULL	NULL	NULL	NULL	NULL	NULL	NULL	1
大创GO-NOGO	1	3	<?xml version="1.0"?>\n<Clock xmlns:dt="urn:schemas-microsoft-com:datatypes"><Description dt:dt="string">E-Prime Primary Realtime Clock</Description><StartTime><Timestamp dt:dt="int">0</Timestamp><DateUtc dt:dt="string">2021-12-17T08:21:57Z</DateUtc></StartTime><FrequencyChanges><FrequencyChange><Frequency dt:dt="r8">10000000</Frequency><Timestamp dt:dt="r8">821279709133</Timestamp><Current dt:dt…	60	1.0.0.33	1	941658464	2.0.10.182	12-17-2021	2021-12-17 08:21:57	16:21:57	2.0.10.92	1	affpro	WordList	1	1	1	84	f	NULL	NULL	NULL	NULL	NULL	NULL	3	NULL	NULL	NULL	NULL	NULL	NULL	NULL	NULL	pra2	taskList1	转基因食物+高科技的	NULL	NULL	NULL	NULL	NULL	NULL	NULL	NULL	NULL	1	f
大创GO-NOGO	1	3	<?xml version="1.0"?>\n<Clock xmlns:dt="urn:schemas-microsoft-com:datatypes"><Description dt:dt="string">E-Prime Primary Realtime Clock</Description><StartTime><Timestamp dt:dt="int">0</Timestamp><DateUtc dt:dt="string">2021-12-17T08:21:57Z</DateUtc></StartTime><FrequencyChanges><FrequencyChange><Frequency dt:dt="r8">10000000</Frequency><Timestamp dt:dt="r8">821279709133</Timestamp><Current dt:dt…	60	1.0.0.33	1	941658464	2.0.10.182	12-17-2021	2021-12-17 08:21:57	16:21:57	2.0.10.92	1	affpro	WordList	1	1	1	85	f	NULL	NULL	NULL	NULL	NULL	NULL	15	NULL	NULL	NULL	NULL	NULL	NULL	NULL	NULL	pra2	taskList1	动物转基因+高科技的	NULL	NULL	NULL	NULL	NULL	NULL	NULL	NULL	NULL	1	f
大创GO-NOGO	1	3	<?xml version="1.0"?>\n<Clock xmlns:dt="urn:schemas-microsoft-com:datatypes"><Description dt:dt="string">E-Prime Primary Realtime Clock</Description><StartTime><Timestamp dt:dt="int">0</Timestamp><DateUtc dt:dt="string">2021-12-17T08:21:57Z</DateUtc></StartTime><FrequencyChanges><FrequencyChange><Frequency dt:dt="r8">10000000</Frequency><Timestamp dt:dt="r8">821279709133</Timestamp><Current dt:dt…	60	1.0.0.33	1	941658464	2.0.10.182	12-17-2021	2021-12-17 08:21:57	16:21:57	2.0.10.92	1	affpro	WordList	1	1	1	86	f	NULL	NULL	NULL	NULL	NULL	NULL	3	NULL	NULL	NULL	NULL	NULL	NULL	NULL	NULL	pra2	taskList1	转基因食物+高科技的	NULL	NULL	NULL	NULL	NULL	NULL	NULL	NULL	NULL	1	f
大创GO-NOGO	1	3	<?xml version="1.0"?>\n<Clock xmlns:dt="urn:schemas-microsoft-com:datatypes"><Description dt:dt="string">E-Prime Primary Realtime Clock</Description><StartTime><Timestamp dt:dt="int">0</Timestamp><DateUtc dt:dt="string">2021-12-17T08:21:57Z</DateUtc></StartTime><FrequencyChanges><FrequencyChange><Frequency dt:dt="r8">10000000</Frequency><Timestamp dt:dt="r8">821279709133</Timestamp><Current dt:dt…	60	1.0.0.33	1	941658464	2.0.10.182	12-17-2021	2021-12-17 08:21:57	16:21:57	2.0.10.92	1	affpro	WordList	1	1	1	87	f	NULL	NULL	NULL	NULL	NULL	NULL	16	NULL	NULL	NULL	NULL	NULL	NULL	NULL	NULL	pra2	taskList1	动物转基因+创新的	NULL	NULL	NULL	NULL	NULL	NULL	NULL	NULL	NULL	1	f
大创GO-NOGO	1	3	<?xml version="1.0"?>\n<Clock xmlns:dt="urn:schemas-microsoft-com:datatypes"><Description dt:dt="string">E-Prime Primary Realtime Clock</Description><StartTime><Timestamp dt:dt="int">0</Timestamp><DateUtc dt:dt="string">2021-12-17T08:21:57Z</DateUtc></StartTime><FrequencyChanges><FrequencyChange><Frequency dt:dt="r8">10000000</Frequency><Timestamp dt:dt="r8">821279709133</Timestamp><Current dt:dt…	60	1.0.0.33	1	941658464	2.0.10.182	12-17-2021	2021-12-17 08:21:57	16:21:57	2.0.10.92	1	affpro	WordList	1	1	1	88		NULL	NULL	14	NULL	NULL	NULL	NULL	NULL	NULL	NULL	NULL	NULL	NULL	NULL	NULL	pra2	taskList1	动物转基因+高风险的	NULL	NULL	NULL	NULL	NULL	NULL	NULL	NULL	NULL	1
大创GO-NOGO	1	3	<?xml version="1.0"?>\n<Clock xmlns:dt="urn:schemas-microsoft-com:datatypes"><Description dt:dt="string">E-Prime Primary Realtime Clock</Description><StartTime><Timestamp dt:dt="int">0</Timestamp><DateUtc dt:dt="string">2021-12-17T08:21:57Z</DateUtc></StartTime><FrequencyChanges><FrequencyChange><Frequency dt:dt="r8">10000000</Frequency><Timestamp dt:dt="r8">821279709133</Timestamp><Current dt:dt…	60	1.0.0.33	1	941658464	2.0.10.182	12-17-2021	2021-12-17 08:21:57	16:21:57	2.0.10.92	1	affpro	WordList	1	1	1	89	f	NULL	NULL	NULL	NULL	NULL	NULL	4	NULL	NULL	NULL	NULL	NULL	NULL	NULL	NULL	pra2	taskList1	转基因食物+创新的	NULL	NULL	NULL	NULL	NULL	NULL	NULL	NULL	NULL	1	f
大创GO-NOGO	1	3	<?xml version="1.0"?>\n<Clock xmlns:dt="urn:schemas-microsoft-com:datatypes"><Description dt:dt="string">E-Prime Primary Realtime Clock</Description><StartTime><Timestamp dt:dt="int">0</Timestamp><DateUtc dt:dt="string">2021-12-17T08:21:57Z</DateUtc></StartTime><FrequencyChanges><FrequencyChange><Frequency dt:dt="r8">10000000</Frequency><Timestamp dt:dt="r8">821279709133</Timestamp><Current dt:dt…	60	1.0.0.33	1	941658464	2.0.10.182	12-17-2021	2021-12-17 08:21:57	16:21:57	2.0.10.92	1	affpro	WordList	1	1	1	90		NULL	NULL	15	NULL	NULL	NULL	NULL	NULL	NULL	NULL	NULL	NULL	NULL	NULL	NULL	pra2	taskList1	动物转基因+非天然的	NULL	NULL	NULL	NULL	NULL	NULL	NULL	NULL	NULL	1
大创GO-NOGO	1	3	<?xml version="1.0"?>\n<Clock xmlns:dt="urn:schemas-microsoft-com:datatypes"><Description dt:dt="string">E-Prime Primary Realtime Clock</Description><StartTime><Timestamp dt:dt="int">0</Timestamp><DateUtc dt:dt="string">2021-12-17T08:21:57Z</DateUtc></StartTime><FrequencyChanges><FrequencyChange><Frequency dt:dt="r8">10000000</Frequency><Timestamp dt:dt="r8">821279709133</Timestamp><Current dt:dt…	60	1.0.0.33	1	941658464	2.0.10.182	12-17-2021	2021-12-17 08:21:57	16:21:57	2.0.10.92	1	affpro	WordList	1	1	1	91		NULL	NULL	8	NULL	NULL	NULL	NULL	NULL	NULL	NULL	NULL	NULL	NULL	NULL	NULL	pra2	taskList1	抗虫害棉花+有争议的	NULL	NULL	NULL	NULL	NULL	NULL	NULL	NULL	NULL	1
大创GO-NOGO	1	3	<?xml version="1.0"?>\n<Clock xmlns:dt="urn:schemas-microsoft-com:datatypes"><Description dt:dt="string">E-Prime Primary Realtime Clock</Description><StartTime><Timestamp dt:dt="int">0</Timestamp><DateUtc dt:dt="string">2021-12-17T08:21:57Z</DateUtc></StartTime><FrequencyChanges><FrequencyChange><Frequency dt:dt="r8">10000000</Frequency><Timestamp dt:dt="r8">821279709133</Timestamp><Current dt:dt…	60	1.0.0.33	1	941658464	2.0.10.182	12-17-2021	2021-12-17 08:21:57	16:21:57	2.0.10.92	1	affpro	WordList	1	1	1	92	f	NULL	NULL	NULL	NULL	NULL	NULL	9	NULL	NULL	NULL	NULL	NULL	NULL	NULL	NULL	pra2	taskList1	转基因大豆+科学的	NULL	NULL	NULL	NULL	NULL	NULL	NULL	NULL	NULL	1	f
大创GO-NOGO	1	3	<?xml version="1.0"?>\n<Clock xmlns:dt="urn:schemas-microsoft-com:datatypes"><Description dt:dt="string">E-Prime Primary Realtime Clock</Description><StartTime><Timestamp dt:dt="int">0</Timestamp><DateUtc dt:dt="string">2021-12-17T08:21:57Z</DateUtc></StartTime><FrequencyChanges><FrequencyChange><Frequency dt:dt="r8">10000000</Frequency><Timestamp dt:dt="r8">821279709133</Timestamp><Current dt:dt…	60	1.0.0.33	1	941658464	2.0.10.182	12-17-2021	2021-12-17 08:21:57	16:21:57	2.0.10.92	1	affpro	WordList	1	1	1	93		NULL	NULL	5	NULL	NULL	NULL	NULL	NULL	NULL	NULL	NULL	NULL	NULL	NULL	NULL	pra2	taskList1	抗虫害棉花+不成熟的	NULL	NULL	NULL	NULL	NULL	NULL	NULL	NULL	NULL	1
大创GO-NOGO	1	3	<?xml version="1.0"?>\n<Clock xmlns:dt="urn:schemas-microsoft-com:datatypes"><Description dt:dt="string">E-Prime Primary Realtime Clock</Description><StartTime><Timestamp dt:dt="int">0</Timestamp><DateUtc dt:dt="string">2021-12-17T08:21:57Z</DateUtc></StartTime><FrequencyChanges><FrequencyChange><Frequency dt:dt="r8">10000000</Frequency><Timestamp dt:dt="r8">821279709133</Timestamp><Current dt:dt…	60	1.0.0.33	1	941658464	2.0.10.182	12-17-2021	2021-12-17 08:21:57	16:21:57	2.0.10.92	1	affpro	WordList	1	1	1	94	f	NULL	NULL	NULL	NULL	NULL	NULL	6	NULL	NULL	NULL	NULL	NULL	NULL	NULL	NULL	pra2	taskList1	抗虫害棉花+高产的	NULL	NULL	NULL	NULL	NULL	NULL	NULL	NULL	NULL	1	f
大创GO-NOGO	1	3	<?xml version="1.0"?>\n<Clock xmlns:dt="urn:schemas-microsoft-com:datatypes"><Description dt:dt="string">E-Prime Primary Realtime Clock</Description><StartTime><Timestamp dt:dt="int">0</Timestamp><DateUtc dt:dt="string">2021-12-17T08:21:57Z</DateUtc></StartTime><FrequencyChanges><FrequencyChange><Frequency dt:dt="r8">10000000</Frequency><Timestamp dt:dt="r8">821279709133</Timestamp><Current dt:dt…	60	1.0.0.33	1	941658464	2.0.10.182	12-17-2021	2021-12-17 08:21:57	16:21:57	2.0.10.92	1	affpro	WordList	1	1	1	95		NULL	NULL	16	NULL	NULL	NULL	NULL	NULL	NULL	NULL	NULL	NULL	NULL	NULL	NULL	pra2	taskList1	动物转基因+有争议的	NULL	NULL	NULL	NULL	NULL	NULL	NULL	NULL	NULL	1
大创GO-NOGO	1	3	<?xml version="1.0"?>\n<Clock xmlns:dt="urn:schemas-microsoft-com:datatypes"><Description dt:dt="string">E-Prime Primary Realtime Clock</Description><StartTime><Timestamp dt:dt="int">0</Timestamp><DateUtc dt:dt="string">2021-12-17T08:21:57Z</DateUtc></StartTime><FrequencyChanges><FrequencyChange><Frequency dt:dt="r8">10000000</Frequency><Timestamp dt:dt="r8">821279709133</Timestamp><Current dt:dt…	60	1.0.0.33	1	941658464	2.0.10.182	12-17-2021	2021-12-17 08:21:57	16:21:57	2.0.10.92	1	affpro	WordList	1	1	1	96		NULL	NULL	1	NULL	NULL	NULL	NULL	NULL	NULL	NULL	NULL	NULL	NULL	NULL	NULL	pra2	taskList1	转基因食物+不成熟的	NULL	NULL	NULL	NULL	NULL	NULL	NULL	NULL	NULL	1
大创GO-NOGO	1	3	<?xml version="1.0"?>\n<Clock xmlns:dt="urn:schemas-microsoft-com:datatypes"><Description dt:dt="string">E-Prime Primary Realtime Clock</Description><StartTime><Timestamp dt:dt="int">0</Timestamp><DateUtc dt:dt="string">2021-12-17T08:21:57Z</DateUtc></StartTime><FrequencyChanges><FrequencyChange><Frequency dt:dt="r8">10000000</Frequency><Timestamp dt:dt="r8">821279709133</Timestamp><Current dt:dt…	60	1.0.0.33	1	941658464	2.0.10.182	12-17-2021	2021-12-17 08:21:57	16:21:57	2.0.10.92	1	affpro	WordList	1	1	1	97	NULL		NULL	NULL	NULL	NULL	NULL	NULL	4	NULL	NULL	NULL	NULL	1	1	1	pra3	practiceList2	转基因食物+创新的	NULL	NULL	NULL	NULL	NULL	NULL	NULL	NULL	NULL	NULL	NULL
大创GO-NOGO	1	3	<?xml version="1.0"?>\n<Clock xmlns:dt="urn:schemas-microsoft-com:datatypes"><Description dt:dt="string">E-Prime Primary Realtime Clock</Description><StartTime><Timestamp dt:dt="int">0</Timestamp><DateUtc dt:dt="string">2021-12-17T08:21:57Z</DateUtc></StartTime><FrequencyChanges><FrequencyChange><Frequency dt:dt="r8">10000000</Frequency><Timestamp dt:dt="r8">821279709133</Timestamp><Current dt:dt…	60	1.0.0.33	1	941658464	2.0.10.182	12-17-2021	2021-12-17 08:21:57	16:21:57	2.0.10.92	1	affpro	WordList	1	1	1	98	NULL		NULL	NULL	NULL	NULL	NULL	NULL	1	NULL	NULL	NULL	NULL	1	2	2	pra3	practiceList2	转基因食物+科学的	NULL	NULL	NULL	NULL	NULL	NULL	NULL	NULL	NULL	NULL	NULL
大创GO-NOGO	1	3	<?xml version="1.0"?>\n<Clock xmlns:dt="urn:schemas-microsoft-com:datatypes"><Description dt:dt="string">E-Prime Primary Realtime Clock</Description><StartTime><Timestamp dt:dt="int">0</Timestamp><DateUtc dt:dt="string">2021-12-17T08:21:57Z</DateUtc></StartTime><FrequencyChanges><FrequencyChange><Frequency dt:dt="r8">10000000</Frequency><Timestamp dt:dt="r8">821279709133</Timestamp><Current dt:dt…	60	1.0.0.33	1	941658464	2.0.10.182	12-17-2021	2021-12-17 08:21:57	16:21:57	2.0.10.92	1	affpro	WordList	1	1	1	99	NULL		NULL	NULL	NULL	NULL	NULL	NULL	6	NULL	NULL	NULL	NULL	1	3	3	pra3	practiceList2	抗虫害棉花+高产的	NULL	NULL	NULL	NULL	NULL	NULL	NULL	NULL	NULL	NULL	NULL
大创GO-NOGO	1	3	<?xml version="1.0"?>\n<Clock xmlns:dt="urn:schemas-microsoft-com:datatypes"><Description dt:dt="string">E-Prime Primary Realtime Clock</Description><StartTime><Timestamp dt:dt="int">0</Timestamp><DateUtc dt:dt="string">2021-12-17T08:21:57Z</DateUtc></StartTime><FrequencyChanges><FrequencyChange><Frequency dt:dt="r8">10000000</Frequency><Timestamp dt:dt="r8">821279709133</Timestamp><Current dt:dt…	60	1.0.0.33	1	941658464	2.0.10.182	12-17-2021	2021-12-17 08:21:57	16:21:57	2.0.10.92	1	affpro	WordList	1	1	1	100	NULL	j	NULL	NULL	10	NULL	NULL	NULL	NULL	NULL	NULL	NULL	NULL	2	4	4	pra3	practiceList2	转基因大豆+高风险的	NULL	NULL	NULL	NULL	NULL	NULL	NULL	NULL	NULL	NULL	NULL
大创GO-NOGO	1	3	<?xml version="1.0"?>\n<Clock xmlns:dt="urn:schemas-microsoft-com:datatypes"><Description dt:dt="string">E-Prime Primary Realtime Clock</Description><StartTime><Timestamp dt:dt="int">0</Timestamp><DateUtc dt:dt="string">2021-12-17T08:21:57Z</DateUtc></StartTime><FrequencyChanges><FrequencyChange><Frequency dt:dt="r8">10000000</Frequency><Timestamp dt:dt="r8">821279709133</Timestamp><Current dt:dt…	60	1.0.0.33	1	941658464	2.0.10.182	12-17-2021	2021-12-17 08:21:57	16:21:57	2.0.10.92	1	affpro	WordList	1	1	1	101	NULL	j	NULL	NULL	7	NULL	NULL	NULL	NULL	NULL	NULL	NULL	NULL	2	5	5	pra3	practiceList2	抗虫害棉花+非天然的	NULL	NULL	NULL	NULL	NULL	NULL	NULL	NULL	NULL	NULL	NULL
大创GO-NOGO	1	3	<?xml version="1.0"?>\n<Clock xmlns:dt="urn:schemas-microsoft-com:datatypes"><Description dt:dt="string">E-Prime Primary Realtime Clock</Description><StartTime><Timestamp dt:dt="int">0</Timestamp><DateUtc dt:dt="string">2021-12-17T08:21:57Z</DateUtc></StartTime><FrequencyChanges><FrequencyChange><Frequency dt:dt="r8">10000000</Frequency><Timestamp dt:dt="r8">821279709133</Timestamp><Current dt:dt…	60	1.0.0.33	1	941658464	2.0.10.182	12-17-2021	2021-12-17 08:21:57	16:21:57	2.0.10.92	1	affpro	WordList	1	1	1	102	NULL		NULL	NULL	NULL	NULL	NULL	NULL	10	NULL	NULL	NULL	NULL	1	6	6	pra3	practiceList2	转基因大豆+高产的	NULL	NULL	NULL	NULL	NULL	NULL	NULL	NULL	NULL	NULL	NULL
大创GO-NOGO	1	3	<?xml version="1.0"?>\n<Clock xmlns:dt="urn:schemas-microsoft-com:datatypes"><Description dt:dt="string">E-Prime Primary Realtime Clock</Description><StartTime><Timestamp dt:dt="int">0</Timestamp><DateUtc dt:dt="string">2021-12-17T08:21:57Z</DateUtc></StartTime><FrequencyChanges><FrequencyChange><Frequency dt:dt="r8">10000000</Frequency><Timestamp dt:dt="r8">821279709133</Timestamp><Current dt:dt…	60	1.0.0.33	1	941658464	2.0.10.182	12-17-2021	2021-12-17 08:21:57	16:21:57	2.0.10.92	1	affpro	WordList	1	1	1	103	NULL	j	NULL	NULL	13	NULL	NULL	NULL	NULL	NULL	NULL	NULL	NULL	2	7	7	pra3	practiceList2	动物转基因+不成熟的	NULL	NULL	NULL	NULL	NULL	NULL	NULL	NULL	NULL	NULL	NULL
大创GO-NOGO	1	3	<?xml version="1.0"?>\n<Clock xmlns:dt="urn:schemas-microsoft-com:datatypes"><Description dt:dt="string">E-Prime Primary Realtime Clock</Description><StartTime><Timestamp dt:dt="int">0</Timestamp><DateUtc dt:dt="string">2021-12-17T08:21:57Z</DateUtc></StartTime><FrequencyChanges><FrequencyChange><Frequency dt:dt="r8">10000000</Frequency><Timestamp dt:dt="r8">821279709133</Timestamp><Current dt:dt…	60	1.0.0.33	1	941658464	2.0.10.182	12-17-2021	2021-12-17 08:21:57	16:21:57	2.0.10.92	1	affpro	WordList	1	1	1	104	NULL		NULL	NULL	NULL	NULL	NULL	NULL	7	NULL	NULL	NULL	NULL	1	8	8	pra3	practiceList2	抗虫害棉花+高科技的	NULL	NULL	NULL	NULL	NULL	NULL	NULL	NULL	NULL	NULL	NULL
大创GO-NOGO	1	3	<?xml version="1.0"?>\n<Clock xmlns:dt="urn:schemas-microsoft-com:datatypes"><Description dt:dt="string">E-Prime Primary Realtime Clock</Description><StartTime><Timestamp dt:dt="int">0</Timestamp><DateUtc dt:dt="string">2021-12-17T08:21:57Z</DateUtc></StartTime><FrequencyChanges><FrequencyChange><Frequency dt:dt="r8">10000000</Frequency><Timestamp dt:dt="r8">821279709133</Timestamp><Current dt:dt…	60	1.0.0.33	1	941658464	2.0.10.182	12-17-2021	2021-12-17 08:21:57	16:21:57	2.0.10.92	1	affpro	WordList	1	1	1	105	NULL	j	NULL	NULL	8	NULL	NULL	NULL	NULL	NULL	NULL	NULL	NULL	2	9	9	pra3	practiceList2	抗虫害棉花+有争议的	NULL	NULL	NULL	NULL	NULL	NULL	NULL	NULL	NULL	NULL	NULL
大创GO-NOGO	1	3	<?xml version="1.0"?>\n<Clock xmlns:dt="urn:schemas-microsoft-com:datatypes"><Description dt:dt="string">E-Prime Primary Realtime Clock</Description><StartTime><Timestamp dt:dt="int">0</Timestamp><DateUtc dt:dt="string">2021-12-17T08:21:57Z</DateUtc></StartTime><FrequencyChanges><FrequencyChange><Frequency dt:dt="r8">10000000</Frequency><Timestamp dt:dt="r8">821279709133</Timestamp><Current dt:dt…	60	1.0.0.33	1	941658464	2.0.10.182	12-17-2021	2021-12-17 08:21:57	16:21:57	2.0.10.92	1	affpro	WordList	1	1	1	106	NULL	j	NULL	NULL	5	NULL	NULL	NULL	NULL	NULL	NULL	NULL	NULL	2	10	10	pra3	practiceList2	抗虫害棉花+不成熟的	NULL	NULL	NULL	NULL	NULL	NULL	NULL	NULL	NULL	NULL	NULL
大创GO-NOGO	1	3	<?xml version="1.0"?>\n<Clock xmlns:dt="urn:schemas-microsoft-com:datatypes"><Description dt:dt="string">E-Prime Primary Realtime Clock</Description><StartTime><Timestamp dt:dt="int">0</Timestamp><DateUtc dt:dt="string">2021-12-17T08:21:57Z</DateUtc></StartTime><FrequencyChanges><FrequencyChange><Frequency dt:dt="r8">10000000</Frequency><Timestamp dt:dt="r8">821279709133</Timestamp><Current dt:dt…	60	1.0.0.33	1	941658464	2.0.10.182	12-17-2021	2021-12-17 08:21:57	16:21:57	2.0.10.92	1	affpro	WordList	1	1	1	107	NULL	j	NULL	NULL	6	NULL	NULL	NULL	NULL	NULL	NULL	NULL	NULL	2	11	11	pra3	practiceList2	抗虫害棉花+高风险的	NULL	NULL	NULL	NULL	NULL	NULL	NULL	NULL	NULL	NULL	NULL
大创GO-NOGO	1	3	<?xml version="1.0"?>\n<Clock xmlns:dt="urn:schemas-microsoft-com:datatypes"><Description dt:dt="string">E-Prime Primary Realtime Clock</Description><StartTime><Timestamp dt:dt="int">0</Timestamp><DateUtc dt:dt="string">2021-12-17T08:21:57Z</DateUtc></StartTime><FrequencyChanges><FrequencyChange><Frequency dt:dt="r8">10000000</Frequency><Timestamp dt:dt="r8">821279709133</Timestamp><Current dt:dt…	60	1.0.0.33	1	941658464	2.0.10.182	12-17-2021	2021-12-17 08:21:57	16:21:57	2.0.10.92	1	affpro	WordList	1	1	1	108	NULL	j	NULL	NULL	16	NULL	NULL	NULL	NULL	NULL	NULL	NULL	NULL	2	12	12	pra3	practiceList2	动物转基因+有争议的	NULL	NULL	NULL	NULL	NULL	NULL	NULL	NULL	NULL	NULL	NULL
大创GO-NOGO	1	3	<?xml version="1.0"?>\n<Clock xmlns:dt="urn:schemas-microsoft-com:datatypes"><Description dt:dt="string">E-Prime Primary Realtime Clock</Description><StartTime><Timestamp dt:dt="int">0</Timestamp><DateUtc dt:dt="string">2021-12-17T08:21:57Z</DateUtc></StartTime><FrequencyChanges><FrequencyChange><Frequency dt:dt="r8">10000000</Frequency><Timestamp dt:dt="r8">821279709133</Timestamp><Current dt:dt…	60	1.0.0.33	1	941658464	2.0.10.182	12-17-2021	2021-12-17 08:21:57	16:21:57	2.0.10.92	1	affpro	WordList	1	1	1	109	NULL	j	NULL	NULL	4	NULL	NULL	NULL	NULL	NULL	NULL	NULL	NULL	2	13	13	pra3	practiceList2	转基因食物+有争议的	NULL	NULL	NULL	NULL	NULL	NULL	NULL	NULL	NULL	NULL	NULL
大创GO-NOGO	1	3	<?xml version="1.0"?>\n<Clock xmlns:dt="urn:schemas-microsoft-com:datatypes"><Description dt:dt="string">E-Prime Primary Realtime Clock</Description><StartTime><Timestamp dt:dt="int">0</Timestamp><DateUtc dt:dt="string">2021-12-17T08:21:57Z</DateUtc></StartTime><FrequencyChanges><FrequencyChange><Frequency dt:dt="r8">10000000</Frequency><Timestamp dt:dt="r8">821279709133</Timestamp><Current dt:dt…	60	1.0.0.33	1	941658464	2.0.10.182	12-17-2021	2021-12-17 08:21:57	16:21:57	2.0.10.92	1	affpro	WordList	1	1	1	110	NULL	j	NULL	NULL	14	NULL	NULL	NULL	NULL	NULL	NULL	NULL	NULL	2	14	14	pra3	practiceList2	动物转基因+高风险的	NULL	NULL	NULL	NULL	NULL	NULL	NULL	NULL	NULL	NULL	NULL
大创GO-NOGO	1	3	<?xml version="1.0"?>\n<Clock xmlns:dt="urn:schemas-microsoft-com:datatypes"><Description dt:dt="string">E-Prime Primary Realtime Clock</Description><StartTime><Timestamp dt:dt="int">0</Timestamp><DateUtc dt:dt="string">2021-12-17T08:21:57Z</DateUtc></StartTime><FrequencyChanges><FrequencyChange><Frequency dt:dt="r8">10000000</Frequency><Timestamp dt:dt="r8">821279709133</Timestamp><Current dt:dt…	60	1.0.0.33	1	941658464	2.0.10.182	12-17-2021	2021-12-17 08:21:57	16:21:57	2.0.10.92	1	affpro	WordList	1	1	1	111	NULL	j	NULL	NULL	15	NULL	NULL	NULL	NULL	NULL	NULL	NULL	NULL	2	15	15	pra3	practiceList2	动物转基因+非天然的	NULL	NULL	NULL	NULL	NULL	NULL	NULL	NULL	NULL	NULL	NULL
大创GO-NOGO	1	3	<?xml version="1.0"?>\n<Clock xmlns:dt="urn:schemas-microsoft-com:datatypes"><Description dt:dt="string">E-Prime Primary Realtime Clock</Description><StartTime><Timestamp dt:dt="int">0</Timestamp><DateUtc dt:dt="string">2021-12-17T08:21:57Z</DateUtc></StartTime><FrequencyChanges><FrequencyChange><Frequency dt:dt="r8">10000000</Frequency><Timestamp dt:dt="r8">821279709133</Timestamp><Current dt:dt…	60	1.0.0.33	1	941658464	2.0.10.182	12-17-2021	2021-12-17 08:21:57	16:21:57	2.0.10.92	1	affpro	WordList	1	1	1	112	NULL	j	NULL	NULL	2	NULL	NULL	NULL	NULL	NULL	NULL	NULL	NULL	2	16	16	pra3	practiceList2	转基因食物+高风险的	NULL	NULL	NULL	NULL	NULL	NULL	NULL	NULL	NULL	NULL	NULL
大创GO-NOGO	1	3	<?xml version="1.0"?>\n<Clock xmlns:dt="urn:schemas-microsoft-com:datatypes"><Description dt:dt="string">E-Prime Primary Realtime Clock</Description><StartTime><Timestamp dt:dt="int">0</Timestamp><DateUtc dt:dt="string">2021-12-17T08:21:57Z</DateUtc></StartTime><FrequencyChanges><FrequencyChange><Frequency dt:dt="r8">10000000</Frequency><Timestamp dt:dt="r8">821279709133</Timestamp><Current dt:dt…	60	1.0.0.33	1	941658464	2.0.10.182	12-17-2021	2021-12-17 08:21:57	16:21:57	2.0.10.92	1	affpro	WordList	1	1	1	113	NULL		NULL	NULL	NULL	NULL	NULL	NULL	12	NULL	NULL	NULL	NULL	1	17	17	pra3	practiceList2	转基因大豆+创新的	NULL	NULL	NULL	NULL	NULL	NULL	NULL	NULL	NULL	NULL	NULL
大创GO-NOGO	1	3	<?xml version="1.0"?>\n<Clock xmlns:dt="urn:schemas-microsoft-com:datatypes"><Description dt:dt="string">E-Prime Primary Realtime Clock</Description><StartTime><Timestamp dt:dt="int">0</Timestamp><DateUtc dt:dt="string">2021-12-17T08:21:57Z</DateUtc></StartTime><FrequencyChanges><FrequencyChange><Frequency dt:dt="r8">10000000</Frequency><Timestamp dt:dt="r8">821279709133</Timestamp><Current dt:dt…	60	1.0.0.33	1	941658464	2.0.10.182	12-17-2021	2021-12-17 08:21:57	16:21:57	2.0.10.92	1	affpro	WordList	1	1	1	114	NULL	j	NULL	NULL	3	NULL	NULL	NULL	NULL	NULL	NULL	NULL	NULL	2	18	18	pra3	practiceList2	转基因食物+非天然的	NULL	NULL	NULL	NULL	NULL	NULL	NULL	NULL	NULL	NULL	NULL
大创GO-NOGO	1	3	<?xml version="1.0"?>\n<Clock xmlns:dt="urn:schemas-microsoft-com:datatypes"><Description dt:dt="string">E-Prime Primary Realtime Clock</Description><StartTime><Timestamp dt:dt="int">0</Timestamp><DateUtc dt:dt="string">2021-12-17T08:21:57Z</DateUtc></StartTime><FrequencyChanges><FrequencyChange><Frequency dt:dt="r8">10000000</Frequency><Timestamp dt:dt="r8">821279709133</Timestamp><Current dt:dt…	60	1.0.0.33	1	941658464	2.0.10.182	12-17-2021	2021-12-17 08:21:57	16:21:57	2.0.10.92	1	affpro	WordList	1	1	1	115	NULL		NULL	NULL	NULL	NULL	NULL	NULL	3	NULL	NULL	NULL	NULL	1	19	19	pra3	practiceList2	转基因食物+高科技的	NULL	NULL	NULL	NULL	NULL	NULL	NULL	NULL	NULL	NULL	NULL
大创GO-NOGO	1	3	<?xml version="1.0"?>\n<Clock xmlns:dt="urn:schemas-microsoft-com:datatypes"><Description dt:dt="string">E-Prime Primary Realtime Clock</Description><StartTime><Timestamp dt:dt="int">0</Timestamp><DateUtc dt:dt="string">2021-12-17T08:21:57Z</DateUtc></StartTime><FrequencyChanges><FrequencyChange><Frequency dt:dt="r8">10000000</Frequency><Timestamp dt:dt="r8">821279709133</Timestamp><Current dt:dt…	60	1.0.0.33	1	941658464	2.0.10.182	12-17-2021	2021-12-17 08:21:57	16:21:57	2.0.10.92	1	affpro	WordList	1	1	1	116	NULL		NULL	NULL	NULL	NULL	NULL	NULL	5	NULL	NULL	NULL	NULL	1	20	20	pra3	practiceList2	抗虫害棉花+科学的	NULL	NULL	NULL	NULL	NULL	NULL	NULL	NULL	NULL	NULL	NULL
大创GO-NOGO	1	3	<?xml version="1.0"?>\n<Clock xmlns:dt="urn:schemas-microsoft-com:datatypes"><Description dt:dt="string">E-Prime Primary Realtime Clock</Description><StartTime><Timestamp dt:dt="int">0</Timestamp><DateUtc dt:dt="string">2021-12-17T08:21:57Z</DateUtc></StartTime><FrequencyChanges><FrequencyChange><Frequency dt:dt="r8">10000000</Frequency><Timestamp dt:dt="r8">821279709133</Timestamp><Current dt:dt…	60	1.0.0.33	1	941658464	2.0.10.182	12-17-2021	2021-12-17 08:21:57	16:21:57	2.0.10.92	1	affpro	WordList	1	1	1	117	NULL	j	NULL	NULL	12	NULL	NULL	NULL	NULL	NULL	NULL	NULL	NULL	2	21	21	pra3	practiceList2	转基因大豆+有争议的	NULL	NULL	NULL	NULL	NULL	NULL	NULL	NULL	NULL	NULL	NULL
大创GO-NOGO	1	3	<?xml version="1.0"?>\n<Clock xmlns:dt="urn:schemas-microsoft-com:datatypes"><Description dt:dt="string">E-Prime Primary Realtime Clock</Description><StartTime><Timestamp dt:dt="int">0</Timestamp><DateUtc dt:dt="string">2021-12-17T08:21:57Z</DateUtc></StartTime><FrequencyChanges><FrequencyChange><Frequency dt:dt="r8">10000000</Frequency><Timestamp dt:dt="r8">821279709133</Timestamp><Current dt:dt…	60	1.0.0.33	1	941658464	2.0.10.182	12-17-2021	2021-12-17 08:21:57	16:21:57	2.0.10.92	1	affpro	WordList	1	1	1	118	NULL	j	NULL	NULL	9	NULL	NULL	NULL	NULL	NULL	NULL	NULL	NULL	2	22	22	pra3	practiceList2	转基因大豆+不成熟的	NULL	NULL	NULL	NULL	NULL	NULL	NULL	NULL	NULL	NULL	NULL
大创GO-NOGO	1	3	<?xml version="1.0"?>\n<Clock xmlns:dt="urn:schemas-microsoft-com:datatypes"><Description dt:dt="string">E-Prime Primary Realtime Clock</Description><StartTime><Timestamp dt:dt="int">0</Timestamp><DateUtc dt:dt="string">2021-12-17T08:21:57Z</DateUtc></StartTime><FrequencyChanges><FrequencyChange><Frequency dt:dt="r8">10000000</Frequency><Timestamp dt:dt="r8">821279709133</Timestamp><Current dt:dt…	60	1.0.0.33	1	941658464	2.0.10.182	12-17-2021	2021-12-17 08:21:57	16:21:57	2.0.10.92	1	affpro	WordList	1	1	1	119	NULL		NULL	NULL	NULL	NULL	NULL	NULL	14	NULL	NULL	NULL	NULL	1	23	23	pra3	practiceList2	动物转基因+高产的	NULL	NULL	NULL	NULL	NULL	NULL	NULL	NULL	NULL	NULL	NULL
大创GO-NOGO	1	3	<?xml version="1.0"?>\n<Clock xmlns:dt="urn:schemas-microsoft-com:datatypes"><Description dt:dt="string">E-Prime Primary Realtime Clock</Description><StartTime><Timestamp dt:dt="int">0</Timestamp><DateUtc dt:dt="string">2021-12-17T08:21:57Z</DateUtc></StartTime><FrequencyChanges><FrequencyChange><Frequency dt:dt="r8">10000000</Frequency><Timestamp dt:dt="r8">821279709133</Timestamp><Current dt:dt…	60	1.0.0.33	1	941658464	2.0.10.182	12-17-2021	2021-12-17 08:21:57	16:21:57	2.0.10.92	1	affpro	WordList	1	1	1	120	NULL		NULL	NULL	NULL	NULL	NULL	NULL	15	NULL	NULL	NULL	NULL	1	24	24	pra3	practiceList2	动物转基因+高科技的	NULL	NULL	NULL	NULL	NULL	NULL	NULL	NULL	NULL	NULL	NULL
大创GO-NOGO	1	3	<?xml version="1.0"?>\n<Clock xmlns:dt="urn:schemas-microsoft-com:datatypes"><Description dt:dt="string">E-Prime Primary Realtime Clock</Description><StartTime><Timestamp dt:dt="int">0</Timestamp><DateUtc dt:dt="string">2021-12-17T08:21:57Z</DateUtc></StartTime><FrequencyChanges><FrequencyChange><Frequency dt:dt="r8">10000000</Frequency><Timestamp dt:dt="r8">821279709133</Timestamp><Current dt:dt…	60	1.0.0.33	1	941658464	2.0.10.182	12-17-2021	2021-12-17 08:21:57	16:21:57	2.0.10.92	1	affpro	WordList	1	1	1	121	NULL	j	NULL	NULL	NULL	7	NULL	NULL	NULL	NULL	NULL	NULL	NULL	NULL	NULL	NULL	pra4	taskList2	抗虫害棉花+非天然的	NULL	NULL	NULL	NULL	NULL	NULL	NULL	NULL	NULL	NULL	NULL
大创GO-NOGO	1	3	<?xml version="1.0"?>\n<Clock xmlns:dt="urn:schemas-microsoft-com:datatypes"><Description dt:dt="string">E-Prime Primary Realtime Clock</Description><StartTime><Timestamp dt:dt="int">0</Timestamp><DateUtc dt:dt="string">2021-12-17T08:21:57Z</DateUtc></StartTime><FrequencyChanges><FrequencyChange><Frequency dt:dt="r8">10000000</Frequency><Timestamp dt:dt="r8">821279709133</Timestamp><Current dt:dt…	60	1.0.0.33	1	941658464	2.0.10.182	12-17-2021	2021-12-17 08:21:57	16:21:57	2.0.10.92	1	affpro	WordList	1	1	1	122	NULL	j	NULL	NULL	NULL	15	NULL	NULL	NULL	NULL	NULL	NULL	NULL	NULL	NULL	NULL	pra4	taskList2	动物转基因+非天然的	NULL	NULL	NULL	NULL	NULL	NULL	NULL	NULL	NULL	NULL	NULL
大创GO-NOGO	1	3	<?xml version="1.0"?>\n<Clock xmlns:dt="urn:schemas-microsoft-com:datatypes"><Description dt:dt="string">E-Prime Primary Realtime Clock</Description><StartTime><Timestamp dt:dt="int">0</Timestamp><DateUtc dt:dt="string">2021-12-17T08:21:57Z</DateUtc></StartTime><FrequencyChanges><FrequencyChange><Frequency dt:dt="r8">10000000</Frequency><Timestamp dt:dt="r8">821279709133</Timestamp><Current dt:dt…	60	1.0.0.33	1	941658464	2.0.10.182	12-17-2021	2021-12-17 08:21:57	16:21:57	2.0.10.92	1	affpro	WordList	1	1	1	123	NULL		NULL	NULL	NULL	NULL	NULL	NULL	NULL	2	NULL	NULL	NULL	NULL	NULL	NULL	pra4	taskList2	转基因食物+高产的	NULL	NULL	NULL	NULL	NULL	NULL	NULL	NULL	NULL	NULL	NULL
大创GO-NOGO	1	3	<?xml version="1.0"?>\n<Clock xmlns:dt="urn:schemas-microsoft-com:datatypes"><Description dt:dt="string">E-Prime Primary Realtime Clock</Description><StartTime><Timestamp dt:dt="int">0</Timestamp><DateUtc dt:dt="string">2021-12-17T08:21:57Z</DateUtc></StartTime><FrequencyChanges><FrequencyChange><Frequency dt:dt="r8">10000000</Frequency><Timestamp dt:dt="r8">821279709133</Timestamp><Current dt:dt…	60	1.0.0.33	1	941658464	2.0.10.182	12-17-2021	2021-12-17 08:21:57	16:21:57	2.0.10.92	1	affpro	WordList	1	1	1	124	NULL	j	NULL	NULL	NULL	8	NULL	NULL	NULL	NULL	NULL	NULL	NULL	NULL	NULL	NULL	pra4	taskList2	抗虫害棉花+有争议的	NULL	NULL	NULL	NULL	NULL	NULL	NULL	NULL	NULL	NULL	NULL
大创GO-NOGO	1	3	<?xml version="1.0"?>\n<Clock xmlns:dt="urn:schemas-microsoft-com:datatypes"><Description dt:dt="string">E-Prime Primary Realtime Clock</Description><StartTime><Timestamp dt:dt="int">0</Timestamp><DateUtc dt:dt="string">2021-12-17T08:21:57Z</DateUtc></StartTime><FrequencyChanges><FrequencyChange><Frequency dt:dt="r8">10000000</Frequency><Timestamp dt:dt="r8">821279709133</Timestamp><Current dt:dt…	60	1.0.0.33	1	941658464	2.0.10.182	12-17-2021	2021-12-17 08:21:57	16:21:57	2.0.10.92	1	affpro	WordList	1	1	1	125	NULL	j	NULL	NULL	NULL	13	NULL	NULL	NULL	NULL	NULL	NULL	NULL	NULL	NULL	NULL	pra4	taskList2	动物转基因+不成熟的	NULL	NULL	NULL	NULL	NULL	NULL	NULL	NULL	NULL	NULL	NULL
大创GO-NOGO	1	3	<?xml version="1.0"?>\n<Clock xmlns:dt="urn:schemas-microsoft-com:datatypes"><Description dt:dt="string">E-Prime Primary Realtime Clock</Description><StartTime><Timestamp dt:dt="int">0</Timestamp><DateUtc dt:dt="string">2021-12-17T08:21:57Z</DateUtc></StartTime><FrequencyChanges><FrequencyChange><Frequency dt:dt="r8">10000000</Frequency><Timestamp dt:dt="r8">821279709133</Timestamp><Current dt:dt…	60	1.0.0.33	1	941658464	2.0.10.182	12-17-2021	2021-12-17 08:21:57	16:21:57	2.0.10.92	1	affpro	WordList	1	1	1	126	NULL	j	NULL	NULL	NULL	5	NULL	NULL	NULL	NULL	NULL	NULL	NULL	NULL	NULL	NULL	pra4	taskList2	抗虫害棉花+不成熟的	NULL	NULL	NULL	NULL	NULL	NULL	NULL	NULL	NULL	NULL	NULL
大创GO-NOGO	1	3	<?xml version="1.0"?>\n<Clock xmlns:dt="urn:schemas-microsoft-com:datatypes"><Description dt:dt="string">E-Prime Primary Realtime Clock</Description><StartTime><Timestamp dt:dt="int">0</Timestamp><DateUtc dt:dt="string">2021-12-17T08:21:57Z</DateUtc></StartTime><FrequencyChanges><FrequencyChange><Frequency dt:dt="r8">10000000</Frequency><Timestamp dt:dt="r8">821279709133</Timestamp><Current dt:dt…	60	1.0.0.33	1	941658464	2.0.10.182	12-17-2021	2021-12-17 08:21:57	16:21:57	2.0.10.92	1	affpro	WordList	1	1	1	127	NULL		NULL	NULL	NULL	NULL	NULL	NULL	NULL	11	NULL	NULL	NULL	NULL	NULL	NULL	pra4	taskList2	转基因大豆+高科技的	NULL	NULL	NULL	NULL	NULL	NULL	NULL	NULL	NULL	NULL	NULL
大创GO-NOGO	1	3	<?xml version="1.0"?>\n<Clock xmlns:dt="urn:schemas-microsoft-com:datatypes"><Description dt:dt="string">E-Prime Primary Realtime Clock</Description><StartTime><Timestamp dt:dt="int">0</Timestamp><DateUtc dt:dt="string">2021-12-17T08:21:57Z</DateUtc></StartTime><FrequencyChanges><FrequencyChange><Frequency dt:dt="r8">10000000</Frequency><Timestamp dt:dt="r8">821279709133</Timestamp><Current dt:dt…	60	1.0.0.33	1	941658464	2.0.10.182	12-17-2021	2021-12-17 08:21:57	16:21:57	2.0.10.92	1	affpro	WordList	1	1	1	128	NULL		NULL	NULL	NULL	NULL	NULL	NULL	NULL	12	NULL	NULL	NULL	NULL	NULL	NULL	pra4	taskList2	转基因大豆+创新的	NULL	NULL	NULL	NULL	NULL	NULL	NULL	NULL	NULL	NULL	NULL
大创GO-NOGO	1	3	<?xml version="1.0"?>\n<Clock xmlns:dt="urn:schemas-microsoft-com:datatypes"><Description dt:dt="string">E-Prime Primary Realtime Clock</Description><StartTime><Timestamp dt:dt="int">0</Timestamp><DateUtc dt:dt="string">2021-12-17T08:21:57Z</DateUtc></StartTime><FrequencyChanges><FrequencyChange><Frequency dt:dt="r8">10000000</Frequency><Timestamp dt:dt="r8">821279709133</Timestamp><Current dt:dt…	60	1.0.0.33	1	941658464	2.0.10.182	12-17-2021	2021-12-17 08:21:57	16:21:57	2.0.10.92	1	affpro	WordList	1	1	1	129	NULL		NULL	NULL	NULL	NULL	NULL	NULL	NULL	8	NULL	NULL	NULL	NULL	NULL	NULL	pra4	taskList2	抗虫害棉花+创新的	NULL	NULL	NULL	NULL	NULL	NULL	NULL	NULL	NULL	NULL	NULL
大创GO-NOGO	1	3	<?xml version="1.0"?>\n<Clock xmlns:dt="urn:schemas-microsoft-com:datatypes"><Description dt:dt="string">E-Prime Primary Realtime Clock</Description><StartTime><Timestamp dt:dt="int">0</Timestamp><DateUtc dt:dt="string">2021-12-17T08:21:57Z</DateUtc></StartTime><FrequencyChanges><FrequencyChange><Frequency dt:dt="r8">10000000</Frequency><Timestamp dt:dt="r8">821279709133</Timestamp><Current dt:dt…	60	1.0.0.33	1	941658464	2.0.10.182	12-17-2021	2021-12-17 08:21:57	16:21:57	2.0.10.92	1	affpro	WordList	1	1	1	130	NULL		NULL	NULL	NULL	NULL	NULL	NULL	NULL	10	NULL	NULL	NULL	NULL	NULL	NULL	pra4	taskList2	转基因大豆+高产的	NULL	NULL	NULL	NULL	NULL	NULL	NULL	NULL	NULL	NULL	NULL
大创GO-NOGO	1	3	<?xml version="1.0"?>\n<Clock xmlns:dt="urn:schemas-microsoft-com:datatypes"><Description dt:dt="string">E-Prime Primary Realtime Clock</Description><StartTime><Timestamp dt:dt="int">0</Timestamp><DateUtc dt:dt="string">2021-12-17T08:21:57Z</DateUtc></StartTime><FrequencyChanges><FrequencyChange><Frequency dt:dt="r8">10000000</Frequency><Timestamp dt:dt="r8">821279709133</Timestamp><Current dt:dt…	60	1.0.0.33	1	941658464	2.0.10.182	12-17-2021	2021-12-17 08:21:57	16:21:57	2.0.10.92	1	affpro	WordList	1	1	1	131	NULL		NULL	NULL	NULL	NULL	NULL	NULL	NULL	1	NULL	NULL	NULL	NULL	NULL	NULL	pra4	taskList2	转基因食物+科学的	NULL	NULL	NULL	NULL	NULL	NULL	NULL	NULL	NULL	NULL	NULL
大创GO-NOGO	1	3	<?xml version="1.0"?>\n<Clock xmlns:dt="urn:schemas-microsoft-com:datatypes"><Description dt:dt="string">E-Prime Primary Realtime Clock</Description><StartTime><Timestamp dt:dt="int">0</Timestamp><DateUtc dt:dt="string">2021-12-17T08:21:57Z</DateUtc></StartTime><FrequencyChanges><FrequencyChange><Frequency dt:dt="r8">10000000</Frequency><Timestamp dt:dt="r8">821279709133</Timestamp><Current dt:dt…	60	1.0.0.33	1	941658464	2.0.10.182	12-17-2021	2021-12-17 08:21:57	16:21:57	2.0.10.92	1	affpro	WordList	1	1	1	132	NULL	j	NULL	NULL	NULL	12	NULL	NULL	NULL	NULL	NULL	NULL	NULL	NULL	NULL	NULL	pra4	taskList2	转基因大豆+有争议的	NULL	NULL	NULL	NULL	NULL	NULL	NULL	NULL	NULL	NULL	NULL
大创GO-NOGO	1	3	<?xml version="1.0"?>\n<Clock xmlns:dt="urn:schemas-microsoft-com:datatypes"><Description dt:dt="string">E-Prime Primary Realtime Clock</Description><StartTime><Timestamp dt:dt="int">0</Timestamp><DateUtc dt:dt="string">2021-12-17T08:21:57Z</DateUtc></StartTime><FrequencyChanges><FrequencyChange><Frequency dt:dt="r8">10000000</Frequency><Timestamp dt:dt="r8">821279709133</Timestamp><Current dt:dt…	60	1.0.0.33	1	941658464	2.0.10.182	12-17-2021	2021-12-17 08:21:57	16:21:57	2.0.10.92	1	affpro	WordList	1	1	1	133	NULL	j	NULL	NULL	NULL	11	NULL	NULL	NULL	NULL	NULL	NULL	NULL	NULL	NULL	NULL	pra4	taskList2	转基因大豆+非天然的	NULL	NULL	NULL	NULL	NULL	NULL	NULL	NULL	NULL	NULL	NULL
大创GO-NOGO	1	3	<?xml version="1.0"?>\n<Clock xmlns:dt="urn:schemas-microsoft-com:datatypes"><Description dt:dt="string">E-Prime Primary Realtime Clock</Description><StartTime><Timestamp dt:dt="int">0</Timestamp><DateUtc dt:dt="string">2021-12-17T08:21:57Z</DateUtc></StartTime><FrequencyChanges><FrequencyChange><Frequency dt:dt="r8">10000000</Frequency><Timestamp dt:dt="r8">821279709133</Timestamp><Current dt:dt…	60	1.0.0.33	1	941658464	2.0.10.182	12-17-2021	2021-12-17 08:21:57	16:21:57	2.0.10.92	1	affpro	WordList	1	1	1	134	NULL		NULL	NULL	NULL	NULL	NULL	NULL	NULL	7	NULL	NULL	NULL	NULL	NULL	NULL	pra4	taskList2	抗虫害棉花+高科技的	NULL	NULL	NULL	NULL	NULL	NULL	NULL	NULL	NULL	NULL	NULL
大创GO-NOGO	1	3	<?xml version="1.0"?>\n<Clock xmlns:dt="urn:schemas-microsoft-com:datatypes"><Description dt:dt="string">E-Prime Primary Realtime Clock</Description><StartTime><Timestamp dt:dt="int">0</Timestamp><DateUtc dt:dt="string">2021-12-17T08:21:57Z</DateUtc></StartTime><FrequencyChanges><FrequencyChange><Frequency dt:dt="r8">10000000</Frequency><Timestamp dt:dt="r8">821279709133</Timestamp><Current dt:dt…	60	1.0.0.33	1	941658464	2.0.10.182	12-17-2021	2021-12-17 08:21:57	16:21:57	2.0.10.92	1	affpro	WordList	1	1	1	135	NULL	j	NULL	NULL	NULL	9	NULL	NULL	NULL	NULL	NULL	NULL	NULL	NULL	NULL	NULL	pra4	taskList2	转基因大豆+不成熟的	NULL	NULL	NULL	NULL	NULL	NULL	NULL	NULL	NULL	NULL	NULL
大创GO-NOGO	1	3	<?xml version="1.0"?>\n<Clock xmlns:dt="urn:schemas-microsoft-com:datatypes"><Description dt:dt="string">E-Prime Primary Realtime Clock</Description><StartTime><Timestamp dt:dt="int">0</Timestamp><DateUtc dt:dt="string">2021-12-17T08:21:57Z</DateUtc></StartTime><FrequencyChanges><FrequencyChange><Frequency dt:dt="r8">10000000</Frequency><Timestamp dt:dt="r8">821279709133</Timestamp><Current dt:dt…	60	1.0.0.33	1	941658464	2.0.10.182	12-17-2021	2021-12-17 08:21:57	16:21:57	2.0.10.92	1	affpro	WordList	1	1	1	136	NULL		NULL	NULL	NULL	NULL	NULL	NULL	NULL	6	NULL	NULL	NULL	NULL	NULL	NULL	pra4	taskList2	抗虫害棉花+高产的	NULL	NULL	NULL	NULL	NULL	NULL	NULL	NULL	NULL	NULL	NULL
大创GO-NOGO	1	3	<?xml version="1.0"?>\n<Clock xmlns:dt="urn:schemas-microsoft-com:datatypes"><Description dt:dt="string">E-Prime Primary Realtime Clock</Description><StartTime><Timestamp dt:dt="int">0</Timestamp><DateUtc dt:dt="string">2021-12-17T08:21:57Z</DateUtc></StartTime><FrequencyChanges><FrequencyChange><Frequency dt:dt="r8">10000000</Frequency><Timestamp dt:dt="r8">821279709133</Timestamp><Current dt:dt…	60	1.0.0.33	1	941658464	2.0.10.182	12-17-2021	2021-12-17 08:21:57	16:21:57	2.0.10.92	1	affpro	WordList	1	1	1	137	NULL	j	NULL	NULL	NULL	6	NULL	NULL	NULL	NULL	NULL	NULL	NULL	NULL	NULL	NULL	pra4	taskList2	抗虫害棉花+高风险的	NULL	NULL	NULL	NULL	NULL	NULL	NULL	NULL	NULL	NULL	NULL
大创GO-NOGO	1	3	<?xml version="1.0"?>\n<Clock xmlns:dt="urn:schemas-microsoft-com:datatypes"><Description dt:dt="string">E-Prime Primary Realtime Clock</Description><StartTime><Timestamp dt:dt="int">0</Timestamp><DateUtc dt:dt="string">2021-12-17T08:21:57Z</DateUtc></StartTime><FrequencyChanges><FrequencyChange><Frequency dt:dt="r8">10000000</Frequency><Timestamp dt:dt="r8">821279709133</Timestamp><Current dt:dt…	60	1.0.0.33	1	941658464	2.0.10.182	12-17-2021	2021-12-17 08:21:57	16:21:57	2.0.10.92	1	affpro	WordList	1	1	1	138	NULL	j	NULL	NULL	NULL	4	NULL	NULL	NULL	NULL	NULL	NULL	NULL	NULL	NULL	NULL	pra4	taskList2	转基因食物+有争议的	NULL	NULL	NULL	NULL	NULL	NULL	NULL	NULL	NULL	NULL	NULL
大创GO-NOGO	1	3	<?xml version="1.0"?>\n<Clock xmlns:dt="urn:schemas-microsoft-com:datatypes"><Description dt:dt="string">E-Prime Primary Realtime Clock</Description><StartTime><Timestamp dt:dt="int">0</Timestamp><DateUtc dt:dt="string">2021-12-17T08:21:57Z</DateUtc></StartTime><FrequencyChanges><FrequencyChange><Frequency dt:dt="r8">10000000</Frequency><Timestamp dt:dt="r8">821279709133</Timestamp><Current dt:dt…	60	1.0.0.33	1	941658464	2.0.10.182	12-17-2021	2021-12-17 08:21:57	16:21:57	2.0.10.92	1	affpro	WordList	1	1	1	139	NULL	j	NULL	NULL	NULL	3	NULL	NULL	NULL	NULL	NULL	NULL	NULL	NULL	NULL	NULL	pra4	taskList2	转基因食物+非天然的	NULL	NULL	NULL	NULL	NULL	NULL	NULL	NULL	NULL	NULL	NULL
大创GO-NOGO	1	3	<?xml version="1.0"?>\n<Clock xmlns:dt="urn:schemas-microsoft-com:datatypes"><Description dt:dt="string">E-Prime Primary Realtime Clock</Description><StartTime><Timestamp dt:dt="int">0</Timestamp><DateUtc dt:dt="string">2021-12-17T08:21:57Z</DateUtc></StartTime><FrequencyChanges><FrequencyChange><Frequency dt:dt="r8">10000000</Frequency><Timestamp dt:dt="r8">821279709133</Timestamp><Current dt:dt…	60	1.0.0.33	1	941658464	2.0.10.182	12-17-2021	2021-12-17 08:21:57	16:21:57	2.0.10.92	1	affpro	WordList	1	1	1	140	NULL		NULL	NULL	NULL	NULL	NULL	NULL	NULL	14	NULL	NULL	NULL	NULL	NULL	NULL	pra4	taskList2	动物转基因+高产的	NULL	NULL	NULL	NULL	NULL	NULL	NULL	NULL	NULL	NULL	NULL
大创GO-NOGO	1	3	<?xml version="1.0"?>\n<Clock xmlns:dt="urn:schemas-microsoft-com:datatypes"><Description dt:dt="string">E-Prime Primary Realtime Clock</Description><StartTime><Timestamp dt:dt="int">0</Timestamp><DateUtc dt:dt="string">2021-12-17T08:21:57Z</DateUtc></StartTime><FrequencyChanges><FrequencyChange><Frequency dt:dt="r8">10000000</Frequency><Timestamp dt:dt="r8">821279709133</Timestamp><Current dt:dt…	60	1.0.0.33	1	941658464	2.0.10.182	12-17-2021	2021-12-17 08:21:57	16:21:57	2.0.10.92	1	affpro	WordList	1	1	1	141	NULL	j	NULL	NULL	NULL	2	NULL	NULL	NULL	NULL	NULL	NULL	NULL	NULL	NULL	NULL	pra4	taskList2	转基因食物+高风险的	NULL	NULL	NULL	NULL	NULL	NULL	NULL	NULL	NULL	NULL	NULL
大创GO-NOGO	1	3	<?xml version="1.0"?>\n<Clock xmlns:dt="urn:schemas-microsoft-com:datatypes"><Description dt:dt="string">E-Prime Primary Realtime Clock</Description><StartTime><Timestamp dt:dt="int">0</Timestamp><DateUtc dt:dt="string">2021-12-17T08:21:57Z</DateUtc></StartTime><FrequencyChanges><FrequencyChange><Frequency dt:dt="r8">10000000</Frequency><Timestamp dt:dt="r8">821279709133</Timestamp><Current dt:dt…	60	1.0.0.33	1	941658464	2.0.10.182	12-17-2021	2021-12-17 08:21:57	16:21:57	2.0.10.92	1	affpro	WordList	1	1	1	142	NULL	j	NULL	NULL	NULL	14	NULL	NULL	NULL	NULL	NULL	NULL	NULL	NULL	NULL	NULL	pra4	taskList2	动物转基因+高风险的	NULL	NULL	NULL	NULL	NULL	NULL	NULL	NULL	NULL	NULL	NULL
大创GO-NOGO	1	3	<?xml version="1.0"?>\n<Clock xmlns:dt="urn:schemas-microsoft-com:datatypes"><Description dt:dt="string">E-Prime Primary Realtime Clock</Description><StartTime><Timestamp dt:dt="int">0</Timestamp><DateUtc dt:dt="string">2021-12-17T08:21:57Z</DateUtc></StartTime><FrequencyChanges><FrequencyChange><Frequency dt:dt="r8">10000000</Frequency><Timestamp dt:dt="r8">821279709133</Timestamp><Current dt:dt…	60	1.0.0.33	1	941658464	2.0.10.182	12-17-2021	2021-12-17 08:21:57	16:21:57	2.0.10.92	1	affpro	WordList	1	1	1	143	NULL	j	NULL	NULL	NULL	1	NULL	NULL	NULL	NULL	NULL	NULL	NULL	NULL	NULL	NULL	pra4	taskList2	转基因食物+不成熟的	NULL	NULL	NULL	NULL	NULL	NULL	NULL	NULL	NULL	NULL	NULL
大创GO-NOGO	1	3	<?xml version="1.0"?>\n<Clock xmlns:dt="urn:schemas-microsoft-com:datatypes"><Description dt:dt="string">E-Prime Primary Realtime Clock</Description><StartTime><Timestamp dt:dt="int">0</Timestamp><DateUtc dt:dt="string">2021-12-17T08:21:57Z</DateUtc></StartTime><FrequencyChanges><FrequencyChange><Frequency dt:dt="r8">10000000</Frequency><Timestamp dt:dt="r8">821279709133</Timestamp><Current dt:dt…	60	1.0.0.33	1	941658464	2.0.10.182	12-17-2021	2021-12-17 08:21:57	16:21:57	2.0.10.92	1	affpro	WordList	1	1	1	144	NULL	j	NULL	NULL	NULL	10	NULL	NULL	NULL	NULL	NULL	NULL	NULL	NULL	NULL	NULL	pra4	taskList2	转基因大豆+高风险的	NULL	NULL	NULL	NULL	NULL	NULL	NULL	NULL	NULL	NULL	NULL
大创GO-NOGO	1	3	<?xml version="1.0"?>\n<Clock xmlns:dt="urn:schemas-microsoft-com:datatypes"><Description dt:dt="string">E-Prime Primary Realtime Clock</Description><StartTime><Timestamp dt:dt="int">0</Timestamp><DateUtc dt:dt="string">2021-12-17T08:21:57Z</DateUtc></StartTime><FrequencyChanges><FrequencyChange><Frequency dt:dt="r8">10000000</Frequency><Timestamp dt:dt="r8">821279709133</Timestamp><Current dt:dt…	60	1.0.0.33	1	941658464	2.0.10.182	12-17-2021	2021-12-17 08:21:57	16:21:57	2.0.10.92	1	affpro	WordList	1	1	1	145	NULL		NULL	NULL	NULL	NULL	NULL	NULL	NULL	4	NULL	NULL	NULL	NULL	NULL	NULL	pra4	taskList2	转基因食物+创新的	NULL	NULL	NULL	NULL	NULL	NULL	NULL	NULL	NULL	NULL	NULL
大创GO-NOGO	1	3	<?xml version="1.0"?>\n<Clock xmlns:dt="urn:schemas-microsoft-com:datatypes"><Description dt:dt="string">E-Prime Primary Realtime Clock</Description><StartTime><Timestamp dt:dt="int">0</Timestamp><DateUtc dt:dt="string">2021-12-17T08:21:57Z</DateUtc></StartTime><FrequencyChanges><FrequencyChange><Frequency dt:dt="r8">10000000</Frequency><Timestamp dt:dt="r8">821279709133</Timestamp><Current dt:dt…	60	1.0.0.33	1	941658464	2.0.10.182	12-17-2021	2021-12-17 08:21:57	16:21:57	2.0.10.92	1	affpro	WordList	1	1	1	146	NULL		NULL	NULL	NULL	NULL	NULL	NULL	NULL	13	NULL	NULL	NULL	NULL	NULL	NULL	pra4	taskList2	动物转基因+科学的	NULL	NULL	NULL	NULL	NULL	NULL	NULL	NULL	NULL	NULL	NULL
大创GO-NOGO	1	3	<?xml version="1.0"?>\n<Clock xmlns:dt="urn:schemas-microsoft-com:datatypes"><Description dt:dt="string">E-Prime Primary Realtime Clock</Description><StartTime><Timestamp dt:dt="int">0</Timestamp><DateUtc dt:dt="string">2021-12-17T08:21:57Z</DateUtc></StartTime><FrequencyChanges><FrequencyChange><Frequency dt:dt="r8">10000000</Frequency><Timestamp dt:dt="r8">821279709133</Timestamp><Current dt:dt…	60	1.0.0.33	1	941658464	2.0.10.182	12-17-2021	2021-12-17 08:21:57	16:21:57	2.0.10.92	1	affpro	WordList	1	1	1	147	NULL	j	NULL	NULL	NULL	16	NULL	NULL	NULL	NULL	NULL	NULL	NULL	NULL	NULL	NULL	pra4	taskList2	动物转基因+有争议的	NULL	NULL	NULL	NULL	NULL	NULL	NULL	NULL	NULL	NULL	NULL
大创GO-NOGO	1	3	<?xml version="1.0"?>\n<Clock xmlns:dt="urn:schemas-microsoft-com:datatypes"><Description dt:dt="string">E-Prime Primary Realtime Clock</Description><StartTime><Timestamp dt:dt="int">0</Timestamp><DateUtc dt:dt="string">2021-12-17T08:21:57Z</DateUtc></StartTime><FrequencyChanges><FrequencyChange><Frequency dt:dt="r8">10000000</Frequency><Timestamp dt:dt="r8">821279709133</Timestamp><Current dt:dt…	60	1.0.0.33	1	941658464	2.0.10.182	12-17-2021	2021-12-17 08:21:57	16:21:57	2.0.10.92	1	affpro	WordList	1	1	1	148	NULL		NULL	NULL	NULL	NULL	NULL	NULL	NULL	15	NULL	NULL	NULL	NULL	NULL	NULL	pra4	taskList2	动物转基因+高科技的	NULL	NULL	NULL	NULL	NULL	NULL	NULL	NULL	NULL	NULL	NULL
大创GO-NOGO	1	3	<?xml version="1.0"?>\n<Clock xmlns:dt="urn:schemas-microsoft-com:datatypes"><Description dt:dt="string">E-Prime Primary Realtime Clock</Description><StartTime><Timestamp dt:dt="int">0</Timestamp><DateUtc dt:dt="string">2021-12-17T08:21:57Z</DateUtc></StartTime><FrequencyChanges><FrequencyChange><Frequency dt:dt="r8">10000000</Frequency><Timestamp dt:dt="r8">821279709133</Timestamp><Current dt:dt…	60	1.0.0.33	1	941658464	2.0.10.182	12-17-2021	2021-12-17 08:21:57	16:21:57	2.0.10.92	1	affpro	WordList	1	1	1	149	NULL		NULL	NULL	NULL	NULL	NULL	NULL	NULL	16	NULL	NULL	NULL	NULL	NULL	NULL	pra4	taskList2	动物转基因+创新的	NULL	NULL	NULL	NULL	NULL	NULL	NULL	NULL	NULL	NULL	NULL
大创GO-NOGO	1	3	<?xml version="1.0"?>\n<Clock xmlns:dt="urn:schemas-microsoft-com:datatypes"><Description dt:dt="string">E-Prime Primary Realtime Clock</Description><StartTime><Timestamp dt:dt="int">0</Timestamp><DateUtc dt:dt="string">2021-12-17T08:21:57Z</DateUtc></StartTime><FrequencyChanges><FrequencyChange><Frequency dt:dt="r8">10000000</Frequency><Timestamp dt:dt="r8">821279709133</Timestamp><Current dt:dt…	60	1.0.0.33	1	941658464	2.0.10.182	12-17-2021	2021-12-17 08:21:57	16:21:57	2.0.10.92	1	affpro	WordList	1	1	1	150	NULL	j	NULL	NULL	NULL	1	NULL	NULL	NULL	NULL	NULL	NULL	NULL	NULL	NULL	NULL	pra4	taskList2	转基因食物+不成熟的	NULL	NULL	NULL	NULL	NULL	NULL	NULL	NULL	NULL	NULL	NULL
大创GO-NOGO	1	3	<?xml version="1.0"?>\n<Clock xmlns:dt="urn:schemas-microsoft-com:datatypes"><Description dt:dt="string">E-Prime Primary Realtime Clock</Description><StartTime><Timestamp dt:dt="int">0</Timestamp><DateUtc dt:dt="string">2021-12-17T08:21:57Z</DateUtc></StartTime><FrequencyChanges><FrequencyChange><Frequency dt:dt="r8">10000000</Frequency><Timestamp dt:dt="r8">821279709133</Timestamp><Current dt:dt…	60	1.0.0.33	1	941658464	2.0.10.182	12-17-2021	2021-12-17 08:21:57	16:21:57	2.0.10.92	1	affpro	WordList	1	1	1	151	NULL		NULL	NULL	NULL	NULL	NULL	NULL	NULL	9	NULL	NULL	NULL	NULL	NULL	NULL	pra4	taskList2	转基因大豆+科学的	NULL	NULL	NULL	NULL	NULL	NULL	NULL	NULL	NULL	NULL	NULL
大创GO-NOGO	1	3	<?xml version="1.0"?>\n<Clock xmlns:dt="urn:schemas-microsoft-com:datatypes"><Description dt:dt="string">E-Prime Primary Realtime Clock</Description><StartTime><Timestamp dt:dt="int">0</Timestamp><DateUtc dt:dt="string">2021-12-17T08:21:57Z</DateUtc></StartTime><FrequencyChanges><FrequencyChange><Frequency dt:dt="r8">10000000</Frequency><Timestamp dt:dt="r8">821279709133</Timestamp><Current dt:dt…	60	1.0.0.33	1	941658464	2.0.10.182	12-17-2021	2021-12-17 08:21:57	16:21:57	2.0.10.92	1	affpro	WordList	1	1	1	152	NULL		NULL	NULL	NULL	NULL	NULL	NULL	NULL	5	NULL	NULL	NULL	NULL	NULL	NULL	pra4	taskList2	抗虫害棉花+科学的	NULL	NULL	NULL	NULL	NULL	NULL	NULL	NULL	NULL	NULL	NULL
大创GO-NOGO	1	3	<?xml version="1.0"?>\n<Clock xmlns:dt="urn:schemas-microsoft-com:datatypes"><Description dt:dt="string">E-Prime Primary Realtime Clock</Description><StartTime><Timestamp dt:dt="int">0</Timestamp><DateUtc dt:dt="string">2021-12-17T08:21:57Z</DateUtc></StartTime><FrequencyChanges><FrequencyChange><Frequency dt:dt="r8">10000000</Frequency><Timestamp dt:dt="r8">821279709133</Timestamp><Current dt:dt…	60	1.0.0.33	1	941658464	2.0.10.182	12-17-2021	2021-12-17 08:21:57	16:21:57	2.0.10.92	1	affpro	WordList	1	1	1	153	NULL	j	NULL	NULL	NULL	11	NULL	NULL	NULL	NULL	NULL	NULL	NULL	NULL	NULL	NULL	pra4	taskList2	转基因大豆+非天然的	NULL	NULL	NULL	NULL	NULL	NULL	NULL	NULL	NULL	NULL	NULL
大创GO-NOGO	1	3	<?xml version="1.0"?>\n<Clock xmlns:dt="urn:schemas-microsoft-com:datatypes"><Description dt:dt="string">E-Prime Primary Realtime Clock</Description><StartTime><Timestamp dt:dt="int">0</Timestamp><DateUtc dt:dt="string">2021-12-17T08:21:57Z</DateUtc></StartTime><FrequencyChanges><FrequencyChange><Frequency dt:dt="r8">10000000</Frequency><Timestamp dt:dt="r8">821279709133</Timestamp><Current dt:dt…	60	1.0.0.33	1	941658464	2.0.10.182	12-17-2021	2021-12-17 08:21:57	16:21:57	2.0.10.92	1	affpro	WordList	1	1	1	154	NULL	j	NULL	NULL	NULL	3	NULL	NULL	NULL	NULL	NULL	NULL	NULL	NULL	NULL	NULL	pra4	taskList2	转基因食物+非天然的	NULL	NULL	NULL	NULL	NULL	NULL	NULL	NULL	NULL	NULL	NULL
大创GO-NOGO	1	3	<?xml version="1.0"?>\n<Clock xmlns:dt="urn:schemas-microsoft-com:datatypes"><Description dt:dt="string">E-Prime Primary Realtime Clock</Description><StartTime><Timestamp dt:dt="int">0</Timestamp><DateUtc dt:dt="string">2021-12-17T08:21:57Z</DateUtc></StartTime><FrequencyChanges><FrequencyChange><Frequency dt:dt="r8">10000000</Frequency><Timestamp dt:dt="r8">821279709133</Timestamp><Current dt:dt…	60	1.0.0.33	1	941658464	2.0.10.182	12-17-2021	2021-12-17 08:21:57	16:21:57	2.0.10.92	1	affpro	WordList	1	1	1	155	NULL	j	NULL	NULL	NULL	4	NULL	NULL	NULL	NULL	NULL	NULL	NULL	NULL	NULL	NULL	pra4	taskList2	转基因食物+有争议的	NULL	NULL	NULL	NULL	NULL	NULL	NULL	NULL	NULL	NULL	NULL
大创GO-NOGO	1	3	<?xml version="1.0"?>\n<Clock xmlns:dt="urn:schemas-microsoft-com:datatypes"><Description dt:dt="string">E-Prime Primary Realtime Clock</Description><StartTime><Timestamp dt:dt="int">0</Timestamp><DateUtc dt:dt="string">2021-12-17T08:21:57Z</DateUtc></StartTime><FrequencyChanges><FrequencyChange><Frequency dt:dt="r8">10000000</Frequency><Timestamp dt:dt="r8">821279709133</Timestamp><Current dt:dt…	60	1.0.0.33	1	941658464	2.0.10.182	12-17-2021	2021-12-17 08:21:57	16:21:57	2.0.10.92	1	affpro	WordList	1	1	1	156	NULL	j	NULL	NULL	NULL	8	NULL	NULL	NULL	NULL	NULL	NULL	NULL	NULL	NULL	NULL	pra4	taskList2	抗虫害棉花+有争议的	NULL	NULL	NULL	NULL	NULL	NULL	NULL	NULL	NULL	NULL	NULL
大创GO-NOGO	1	3	<?xml version="1.0"?>\n<Clock xmlns:dt="urn:schemas-microsoft-com:datatypes"><Description dt:dt="string">E-Prime Primary Realtime Clock</Description><StartTime><Timestamp dt:dt="int">0</Timestamp><DateUtc dt:dt="string">2021-12-17T08:21:57Z</DateUtc></StartTime><FrequencyChanges><FrequencyChange><Frequency dt:dt="r8">10000000</Frequency><Timestamp dt:dt="r8">821279709133</Timestamp><Current dt:dt…	60	1.0.0.33	1	941658464	2.0.10.182	12-17-2021	2021-12-17 08:21:57	16:21:57	2.0.10.92	1	affpro	WordList	1	1	1	157	NULL	j	NULL	NULL	NULL	5	NULL	NULL	NULL	NULL	NULL	NULL	NULL	NULL	NULL	NULL	pra4	taskList2	抗虫害棉花+不成熟的	NULL	NULL	NULL	NULL	NULL	NULL	NULL	NULL	NULL	NULL	NULL
大创GO-NOGO	1	3	<?xml version="1.0"?>\n<Clock xmlns:dt="urn:schemas-microsoft-com:datatypes"><Description dt:dt="string">E-Prime Primary Realtime Clock</Description><StartTime><Timestamp dt:dt="int">0</Timestamp><DateUtc dt:dt="string">2021-12-17T08:21:57Z</DateUtc></StartTime><FrequencyChanges><FrequencyChange><Frequency dt:dt="r8">10000000</Frequency><Timestamp dt:dt="r8">821279709133</Timestamp><Current dt:dt…	60	1.0.0.33	1	941658464	2.0.10.182	12-17-2021	2021-12-17 08:21:57	16:21:57	2.0.10.92	1	affpro	WordList	1	1	1	158	NULL	j	NULL	NULL	NULL	10	NULL	NULL	NULL	NULL	NULL	NULL	NULL	NULL	NULL	NULL	pra4	taskList2	转基因大豆+高风险的	NULL	NULL	NULL	NULL	NULL	NULL	NULL	NULL	NULL	NULL	NULL
大创GO-NOGO	1	3	<?xml version="1.0"?>\n<Clock xmlns:dt="urn:schemas-microsoft-com:datatypes"><Description dt:dt="string">E-Prime Primary Realtime Clock</Description><StartTime><Timestamp dt:dt="int">0</Timestamp><DateUtc dt:dt="string">2021-12-17T08:21:57Z</DateUtc></StartTime><FrequencyChanges><FrequencyChange><Frequency dt:dt="r8">10000000</Frequency><Timestamp dt:dt="r8">821279709133</Timestamp><Current dt:dt…	60	1.0.0.33	1	941658464	2.0.10.182	12-17-2021	2021-12-17 08:21:57	16:21:57	2.0.10.92	1	affpro	WordList	1	1	1	159	NULL	j	NULL	NULL	NULL	2	NULL	NULL	NULL	NULL	NULL	NULL	NULL	NULL	NULL	NULL	pra4	taskList2	转基因食物+高风险的	NULL	NULL	NULL	NULL	NULL	NULL	NULL	NULL	NULL	NULL	NULL
大创GO-NOGO	1	3	<?xml version="1.0"?>\n<Clock xmlns:dt="urn:schemas-microsoft-com:datatypes"><Description dt:dt="string">E-Prime Primary Realtime Clock</Description><StartTime><Timestamp dt:dt="int">0</Timestamp><DateUtc dt:dt="string">2021-12-17T08:21:57Z</DateUtc></StartTime><FrequencyChanges><FrequencyChange><Frequency dt:dt="r8">10000000</Frequency><Timestamp dt:dt="r8">821279709133</Timestamp><Current dt:dt…	60	1.0.0.33	1	941658464	2.0.10.182	12-17-2021	2021-12-17 08:21:57	16:21:57	2.0.10.92	1	affpro	WordList	1	1	1	160	NULL	j	NULL	NULL	NULL	7	NULL	NULL	NULL	NULL	NULL	NULL	NULL	NULL	NULL	NULL	pra4	taskList2	抗虫害棉花+非天然的	NULL	NULL	NULL	NULL	NULL	NULL	NULL	NULL	NULL	NULL	NULL
大创GO-NOGO	1	3	<?xml version="1.0"?>\n<Clock xmlns:dt="urn:schemas-microsoft-com:datatypes"><Description dt:dt="string">E-Prime Primary Realtime Clock</Description><StartTime><Timestamp dt:dt="int">0</Timestamp><DateUtc dt:dt="string">2021-12-17T08:21:57Z</DateUtc></StartTime><FrequencyChanges><FrequencyChange><Frequency dt:dt="r8">10000000</Frequency><Timestamp dt:dt="r8">821279709133</Timestamp><Current dt:dt…	60	1.0.0.33	1	941658464	2.0.10.182	12-17-2021	2021-12-17 08:21:57	16:21:57	2.0.10.92	1	affpro	WordList	1	1	1	161	NULL	j	NULL	NULL	NULL	12	NULL	NULL	NULL	NULL	NULL	NULL	NULL	NULL	NULL	NULL	pra4	taskList2	转基因大豆+有争议的	NULL	NULL	NULL	NULL	NULL	NULL	NULL	NULL	NULL	NULL	NULL
大创GO-NOGO	1	3	<?xml version="1.0"?>\n<Clock xmlns:dt="urn:schemas-microsoft-com:datatypes"><Description dt:dt="string">E-Prime Primary Realtime Clock</Description><StartTime><Timestamp dt:dt="int">0</Timestamp><DateUtc dt:dt="string">2021-12-17T08:21:57Z</DateUtc></StartTime><FrequencyChanges><FrequencyChange><Frequency dt:dt="r8">10000000</Frequency><Timestamp dt:dt="r8">821279709133</Timestamp><Current dt:dt…	60	1.0.0.33	1	941658464	2.0.10.182	12-17-2021	2021-12-17 08:21:57	16:21:57	2.0.10.92	1	affpro	WordList	1	1	1	162	NULL		NULL	NULL	NULL	NULL	NULL	NULL	NULL	3	NULL	NULL	NULL	NULL	NULL	NULL	pra4	taskList2	转基因食物+高科技的	NULL	NULL	NULL	NULL	NULL	NULL	NULL	NULL	NULL	NULL	NULL
大创GO-NOGO	1	3	<?xml version="1.0"?>\n<Clock xmlns:dt="urn:schemas-microsoft-com:datatypes"><Description dt:dt="string">E-Prime Primary Realtime Clock</Description><StartTime><Timestamp dt:dt="int">0</Timestamp><DateUtc dt:dt="string">2021-12-17T08:21:57Z</DateUtc></StartTime><FrequencyChanges><FrequencyChange><Frequency dt:dt="r8">10000000</Frequency><Timestamp dt:dt="r8">821279709133</Timestamp><Current dt:dt…	60	1.0.0.33	1	941658464	2.0.10.182	12-17-2021	2021-12-17 08:21:57	16:21:57	2.0.10.92	1	affpro	WordList	1	1	1	163	NULL		NULL	NULL	NULL	NULL	NULL	NULL	NULL	1	NULL	NULL	NULL	NULL	NULL	NULL	pra4	taskList2	转基因食物+科学的	NULL	NULL	NULL	NULL	NULL	NULL	NULL	NULL	NULL	NULL	NULL
大创GO-NOGO	1	3	<?xml version="1.0"?>\n<Clock xmlns:dt="urn:schemas-microsoft-com:datatypes"><Description dt:dt="string">E-Prime Primary Realtime Clock</Description><StartTime><Timestamp dt:dt="int">0</Timestamp><DateUtc dt:dt="string">2021-12-17T08:21:57Z</DateUtc></StartTime><FrequencyChanges><FrequencyChange><Frequency dt:dt="r8">10000000</Frequency><Timestamp dt:dt="r8">821279709133</Timestamp><Current dt:dt…	60	1.0.0.33	1	941658464	2.0.10.182	12-17-2021	2021-12-17 08:21:57	16:21:57	2.0.10.92	1	affpro	WordList	1	1	1	164	NULL		NULL	NULL	NULL	NULL	NULL	NULL	NULL	3	NULL	NULL	NULL	NULL	NULL	NULL	pra4	taskList2	转基因食物+高科技的	NULL	NULL	NULL	NULL	NULL	NULL	NULL	NULL	NULL	NULL	NULL
大创GO-NOGO	1	3	<?xml version="1.0"?>\n<Clock xmlns:dt="urn:schemas-microsoft-com:datatypes"><Description dt:dt="string">E-Prime Primary Realtime Clock</Description><StartTime><Timestamp dt:dt="int">0</Timestamp><DateUtc dt:dt="string">2021-12-17T08:21:57Z</DateUtc></StartTime><FrequencyChanges><FrequencyChange><Frequency dt:dt="r8">10000000</Frequency><Timestamp dt:dt="r8">821279709133</Timestamp><Current dt:dt…	60	1.0.0.33	1	941658464	2.0.10.182	12-17-2021	2021-12-17 08:21:57	16:21:57	2.0.10.92	1	affpro	WordList	1	1	1	165	NULL		NULL	NULL	NULL	NULL	NULL	NULL	NULL	9	NULL	NULL	NULL	NULL	NULL	NULL	pra4	taskList2	转基因大豆+科学的	NULL	NULL	NULL	NULL	NULL	NULL	NULL	NULL	NULL	NULL	NULL
大创GO-NOGO	1	3	<?xml version="1.0"?>\n<Clock xmlns:dt="urn:schemas-microsoft-com:datatypes"><Description dt:dt="string">E-Prime Primary Realtime Clock</Description><StartTime><Timestamp dt:dt="int">0</Timestamp><DateUtc dt:dt="string">2021-12-17T08:21:57Z</DateUtc></StartTime><FrequencyChanges><FrequencyChange><Frequency dt:dt="r8">10000000</Frequency><Timestamp dt:dt="r8">821279709133</Timestamp><Current dt:dt…	60	1.0.0.33	1	941658464	2.0.10.182	12-17-2021	2021-12-17 08:21:57	16:21:57	2.0.10.92	1	affpro	WordList	1	1	1	166	NULL	j	NULL	NULL	NULL	16	NULL	NULL	NULL	NULL	NULL	NULL	NULL	NULL	NULL	NULL	pra4	taskList2	动物转基因+有争议的	NULL	NULL	NULL	NULL	NULL	NULL	NULL	NULL	NULL	NULL	NULL
大创GO-NOGO	1	3	<?xml version="1.0"?>\n<Clock xmlns:dt="urn:schemas-microsoft-com:datatypes"><Description dt:dt="string">E-Prime Primary Realtime Clock</Description><StartTime><Timestamp dt:dt="int">0</Timestamp><DateUtc dt:dt="string">2021-12-17T08:21:57Z</DateUtc></StartTime><FrequencyChanges><FrequencyChange><Frequency dt:dt="r8">10000000</Frequency><Timestamp dt:dt="r8">821279709133</Timestamp><Current dt:dt…	60	1.0.0.33	1	941658464	2.0.10.182	12-17-2021	2021-12-17 08:21:57	16:21:57	2.0.10.92	1	affpro	WordList	1	1	1	167	NULL		NULL	NULL	NULL	NULL	NULL	NULL	NULL	11	NULL	NULL	NULL	NULL	NULL	NULL	pra4	taskList2	转基因大豆+高科技的	NULL	NULL	NULL	NULL	NULL	NULL	NULL	NULL	NULL	NULL	NULL
大创GO-NOGO	1	3	<?xml version="1.0"?>\n<Clock xmlns:dt="urn:schemas-microsoft-com:datatypes"><Description dt:dt="string">E-Prime Primary Realtime Clock</Description><StartTime><Timestamp dt:dt="int">0</Timestamp><DateUtc dt:dt="string">2021-12-17T08:21:57Z</DateUtc></StartTime><FrequencyChanges><FrequencyChange><Frequency dt:dt="r8">10000000</Frequency><Timestamp dt:dt="r8">821279709133</Timestamp><Current dt:dt…	60	1.0.0.33	1	941658464	2.0.10.182	12-17-2021	2021-12-17 08:21:57	16:21:57	2.0.10.92	1	affpro	WordList	1	1	1	168	NULL		NULL	NULL	NULL	NULL	NULL	NULL	NULL	8	NULL	NULL	NULL	NULL	NULL	NULL	pra4	taskList2	抗虫害棉花+创新的	NULL	NULL	NULL	NULL	NULL	NULL	NULL	NULL	NULL	NULL	NULL
大创GO-NOGO	1	3	<?xml version="1.0"?>\n<Clock xmlns:dt="urn:schemas-microsoft-com:datatypes"><Description dt:dt="string">E-Prime Primary Realtime Clock</Description><StartTime><Timestamp dt:dt="int">0</Timestamp><DateUtc dt:dt="string">2021-12-17T08:21:57Z</DateUtc></StartTime><FrequencyChanges><FrequencyChange><Frequency dt:dt="r8">10000000</Frequency><Timestamp dt:dt="r8">821279709133</Timestamp><Current dt:dt…	60	1.0.0.33	1	941658464	2.0.10.182	12-17-2021	2021-12-17 08:21:57	16:21:57	2.0.10.92	1	affpro	WordList	1	1	1	169	NULL	j	NULL	NULL	NULL	9	NULL	NULL	NULL	NULL	NULL	NULL	NULL	NULL	NULL	NULL	pra4	taskList2	转基因大豆+不成熟的	NULL	NULL	NULL	NULL	NULL	NULL	NULL	NULL	NULL	NULL	NULL
大创GO-NOGO	1	3	<?xml version="1.0"?>\n<Clock xmlns:dt="urn:schemas-microsoft-com:datatypes"><Description dt:dt="string">E-Prime Primary Realtime Clock</Description><StartTime><Timestamp dt:dt="int">0</Timestamp><DateUtc dt:dt="string">2021-12-17T08:21:57Z</DateUtc></StartTime><FrequencyChanges><FrequencyChange><Frequency dt:dt="r8">10000000</Frequency><Timestamp dt:dt="r8">821279709133</Timestamp><Current dt:dt…	60	1.0.0.33	1	941658464	2.0.10.182	12-17-2021	2021-12-17 08:21:57	16:21:57	2.0.10.92	1	affpro	WordList	1	1	1	170	NULL		NULL	NULL	NULL	NULL	NULL	NULL	NULL	6	NULL	NULL	NULL	NULL	NULL	NULL	pra4	taskList2	抗虫害棉花+高产的	NULL	NULL	NULL	NULL	NULL	NULL	NULL	NULL	NULL	NULL	NULL
大创GO-NOGO	1	3	<?xml version="1.0"?>\n<Clock xmlns:dt="urn:schemas-microsoft-com:datatypes"><Description dt:dt="string">E-Prime Primary Realtime Clock</Description><StartTime><Timestamp dt:dt="int">0</Timestamp><DateUtc dt:dt="string">2021-12-17T08:21:57Z</DateUtc></StartTime><FrequencyChanges><FrequencyChange><Frequency dt:dt="r8">10000000</Frequency><Timestamp dt:dt="r8">821279709133</Timestamp><Current dt:dt…	60	1.0.0.33	1	941658464	2.0.10.182	12-17-2021	2021-12-17 08:21:57	16:21:57	2.0.10.92	1	affpro	WordList	1	1	1	171	NULL		NULL	NULL	NULL	NULL	NULL	NULL	NULL	12	NULL	NULL	NULL	NULL	NULL	NULL	pra4	taskList2	转基因大豆+创新的	NULL	NULL	NULL	NULL	NULL	NULL	NULL	NULL	NULL	NULL	NULL
大创GO-NOGO	1	3	<?xml version="1.0"?>\n<Clock xmlns:dt="urn:schemas-microsoft-com:datatypes"><Description dt:dt="string">E-Prime Primary Realtime Clock</Description><StartTime><Timestamp dt:dt="int">0</Timestamp><DateUtc dt:dt="string">2021-12-17T08:21:57Z</DateUtc></StartTime><FrequencyChanges><FrequencyChange><Frequency dt:dt="r8">10000000</Frequency><Timestamp dt:dt="r8">821279709133</Timestamp><Current dt:dt…	60	1.0.0.33	1	941658464	2.0.10.182	12-17-2021	2021-12-17 08:21:57	16:21:57	2.0.10.92	1	affpro	WordList	1	1	1	172	NULL		NULL	NULL	NULL	NULL	NULL	NULL	NULL	4	NULL	NULL	NULL	NULL	NULL	NULL	pra4	taskList2	转基因食物+创新的	NULL	NULL	NULL	NULL	NULL	NULL	NULL	NULL	NULL	NULL	NULL
大创GO-NOGO	1	3	<?xml version="1.0"?>\n<Clock xmlns:dt="urn:schemas-microsoft-com:datatypes"><Description dt:dt="string">E-Prime Primary Realtime Clock</Description><StartTime><Timestamp dt:dt="int">0</Timestamp><DateUtc dt:dt="string">2021-12-17T08:21:57Z</DateUtc></StartTime><FrequencyChanges><FrequencyChange><Frequency dt:dt="r8">10000000</Frequency><Timestamp dt:dt="r8">821279709133</Timestamp><Current dt:dt…	60	1.0.0.33	1	941658464	2.0.10.182	12-17-2021	2021-12-17 08:21:57	16:21:57	2.0.10.92	1	affpro	WordList	1	1	1	173	NULL		NULL	NULL	NULL	NULL	NULL	NULL	NULL	5	NULL	NULL	NULL	NULL	NULL	NULL	pra4	taskList2	抗虫害棉花+科学的	NULL	NULL	NULL	NULL	NULL	NULL	NULL	NULL	NULL	NULL	NULL
大创GO-NOGO	1	3	<?xml version="1.0"?>\n<Clock xmlns:dt="urn:schemas-microsoft-com:datatypes"><Description dt:dt="string">E-Prime Primary Realtime Clock</Description><StartTime><Timestamp dt:dt="int">0</Timestamp><DateUtc dt:dt="string">2021-12-17T08:21:57Z</DateUtc></StartTime><FrequencyChanges><FrequencyChange><Frequency dt:dt="r8">10000000</Frequency><Timestamp dt:dt="r8">821279709133</Timestamp><Current dt:dt…	60	1.0.0.33	1	941658464	2.0.10.182	12-17-2021	2021-12-17 08:21:57	16:21:57	2.0.10.92	1	affpro	WordList	1	1	1	174	NULL		NULL	NULL	NULL	NULL	NULL	NULL	NULL	15	NULL	NULL	NULL	NULL	NULL	NULL	pra4	taskList2	动物转基因+高科技的	NULL	NULL	NULL	NULL	NULL	NULL	NULL	NULL	NULL	NULL	NULL
大创GO-NOGO	1	3	<?xml version="1.0"?>\n<Clock xmlns:dt="urn:schemas-microsoft-com:datatypes"><Description dt:dt="string">E-Prime Primary Realtime Clock</Description><StartTime><Timestamp dt:dt="int">0</Timestamp><DateUtc dt:dt="string">2021-12-17T08:21:57Z</DateUtc></StartTime><FrequencyChanges><FrequencyChange><Frequency dt:dt="r8">10000000</Frequency><Timestamp dt:dt="r8">821279709133</Timestamp><Current dt:dt…	60	1.0.0.33	1	941658464	2.0.10.182	12-17-2021	2021-12-17 08:21:57	16:21:57	2.0.10.92	1	affpro	WordList	1	1	1	175	NULL	j	NULL	NULL	NULL	13	NULL	NULL	NULL	NULL	NULL	NULL	NULL	NULL	NULL	NULL	pra4	taskList2	动物转基因+不成熟的	NULL	NULL	NULL	NULL	NULL	NULL	NULL	NULL	NULL	NULL	NULL
大创GO-NOGO	1	3	<?xml version="1.0"?>\n<Clock xmlns:dt="urn:schemas-microsoft-com:datatypes"><Description dt:dt="string">E-Prime Primary Realtime Clock</Description><StartTime><Timestamp dt:dt="int">0</Timestamp><DateUtc dt:dt="string">2021-12-17T08:21:57Z</DateUtc></StartTime><FrequencyChanges><FrequencyChange><Frequency dt:dt="r8">10000000</Frequency><Timestamp dt:dt="r8">821279709133</Timestamp><Current dt:dt…	60	1.0.0.33	1	941658464	2.0.10.182	12-17-2021	2021-12-17 08:21:57	16:21:57	2.0.10.92	1	affpro	WordList	1	1	1	176	NULL	j	NULL	NULL	NULL	15	NULL	NULL	NULL	NULL	NULL	NULL	NULL	NULL	NULL	NULL	pra4	taskList2	动物转基因+非天然的	NULL	NULL	NULL	NULL	NULL	NULL	NULL	NULL	NULL	NULL	NULL
大创GO-NOGO	1	3	<?xml version="1.0"?>\n<Clock xmlns:dt="urn:schemas-microsoft-com:datatypes"><Description dt:dt="string">E-Prime Primary Realtime Clock</Description><StartTime><Timestamp dt:dt="int">0</Timestamp><DateUtc dt:dt="string">2021-12-17T08:21:57Z</DateUtc></StartTime><FrequencyChanges><FrequencyChange><Frequency dt:dt="r8">10000000</Frequency><Timestamp dt:dt="r8">821279709133</Timestamp><Current dt:dt…	60	1.0.0.33	1	941658464	2.0.10.182	12-17-2021	2021-12-17 08:21:57	16:21:57	2.0.10.92	1	affpro	WordList	1	1	1	177	NULL		NULL	NULL	NULL	NULL	NULL	NULL	NULL	13	NULL	NULL	NULL	NULL	NULL	NULL	pra4	taskList2	动物转基因+科学的	NULL	NULL	NULL	NULL	NULL	NULL	NULL	NULL	NULL	NULL	NULL
大创GO-NOGO	1	3	<?xml version="1.0"?>\n<Clock xmlns:dt="urn:schemas-microsoft-com:datatypes"><Description dt:dt="string">E-Prime Primary Realtime Clock</Description><StartTime><Timestamp dt:dt="int">0</Timestamp><DateUtc dt:dt="string">2021-12-17T08:21:57Z</DateUtc></StartTime><FrequencyChanges><FrequencyChange><Frequency dt:dt="r8">10000000</Frequency><Timestamp dt:dt="r8">821279709133</Timestamp><Current dt:dt…	60	1.0.0.33	1	941658464	2.0.10.182	12-17-2021	2021-12-17 08:21:57	16:21:57	2.0.10.92	1	affpro	WordList	1	1	1	178	NULL		NULL	NULL	NULL	NULL	NULL	NULL	NULL	2	NULL	NULL	NULL	NULL	NULL	NULL	pra4	taskList2	转基因食物+高产的	NULL	NULL	NULL	NULL	NULL	NULL	NULL	NULL	NULL	NULL	NULL
大创GO-NOGO	1	3	<?xml version="1.0"?>\n<Clock xmlns:dt="urn:schemas-microsoft-com:datatypes"><Description dt:dt="string">E-Prime Primary Realtime Clock</Description><StartTime><Timestamp dt:dt="int">0</Timestamp><DateUtc dt:dt="string">2021-12-17T08:21:57Z</DateUtc></StartTime><FrequencyChanges><FrequencyChange><Frequency dt:dt="r8">10000000</Frequency><Timestamp dt:dt="r8">821279709133</Timestamp><Current dt:dt…	60	1.0.0.33	1	941658464	2.0.10.182	12-17-2021	2021-12-17 08:21:57	16:21:57	2.0.10.92	1	affpro	WordList	1	1	1	179	NULL		NULL	NULL	NULL	NULL	NULL	NULL	NULL	10	NULL	NULL	NULL	NULL	NULL	NULL	pra4	taskList2	转基因大豆+高产的	NULL	NULL	NULL	NULL	NULL	NULL	NULL	NULL	NULL	NULL	NULL
大创GO-NOGO	1	3	<?xml version="1.0"?>\n<Clock xmlns:dt="urn:schemas-microsoft-com:datatypes"><Description dt:dt="string">E-Prime Primary Realtime Clock</Description><StartTime><Timestamp dt:dt="int">0</Timestamp><DateUtc dt:dt="string">2021-12-17T08:21:57Z</DateUtc></StartTime><FrequencyChanges><FrequencyChange><Frequency dt:dt="r8">10000000</Frequency><Timestamp dt:dt="r8">821279709133</Timestamp><Current dt:dt…	60	1.0.0.33	1	941658464	2.0.10.182	12-17-2021	2021-12-17 08:21:57	16:21:57	2.0.10.92	1	affpro	WordList	1	1	1	180	NULL	j	NULL	NULL	NULL	6	NULL	NULL	NULL	NULL	NULL	NULL	NULL	NULL	NULL	NULL	pra4	taskList2	抗虫害棉花+高风险的	NULL	NULL	NULL	NULL	NULL	NULL	NULL	NULL	NULL	NULL	NULL
大创GO-NOGO	1	3	<?xml version="1.0"?>\n<Clock xmlns:dt="urn:schemas-microsoft-com:datatypes"><Description dt:dt="string">E-Prime Primary Realtime Clock</Description><StartTime><Timestamp dt:dt="int">0</Timestamp><DateUtc dt:dt="string">2021-12-17T08:21:57Z</DateUtc></StartTime><FrequencyChanges><FrequencyChange><Frequency dt:dt="r8">10000000</Frequency><Timestamp dt:dt="r8">821279709133</Timestamp><Current dt:dt…	60	1.0.0.33	1	941658464	2.0.10.182	12-17-2021	2021-12-17 08:21:57	16:21:57	2.0.10.92	1	affpro	WordList	1	1	1	181	NULL		NULL	NULL	NULL	NULL	NULL	NULL	NULL	16	NULL	NULL	NULL	NULL	NULL	NULL	pra4	taskList2	动物转基因+创新的	NULL	NULL	NULL	NULL	NULL	NULL	NULL	NULL	NULL	NULL	NULL
大创GO-NOGO	1	3	<?xml version="1.0"?>\n<Clock xmlns:dt="urn:schemas-microsoft-com:datatypes"><Description dt:dt="string">E-Prime Primary Realtime Clock</Description><StartTime><Timestamp dt:dt="int">0</Timestamp><DateUtc dt:dt="string">2021-12-17T08:21:57Z</DateUtc></StartTime><FrequencyChanges><FrequencyChange><Frequency dt:dt="r8">10000000</Frequency><Timestamp dt:dt="r8">821279709133</Timestamp><Current dt:dt…	60	1.0.0.33	1	941658464	2.0.10.182	12-17-2021	2021-12-17 08:21:57	16:21:57	2.0.10.92	1	affpro	WordList	1	1	1	182	NULL	j	NULL	NULL	NULL	14	NULL	NULL	NULL	NULL	NULL	NULL	NULL	NULL	NULL	NULL	pra4	taskList2	动物转基因+高风险的	NULL	NULL	NULL	NULL	NULL	NULL	NULL	NULL	NULL	NULL	NULL
大创GO-NOGO	1	3	<?xml version="1.0"?>\n<Clock xmlns:dt="urn:schemas-microsoft-com:datatypes"><Description dt:dt="string">E-Prime Primary Realtime Clock</Description><StartTime><Timestamp dt:dt="int">0</Timestamp><DateUtc dt:dt="string">2021-12-17T08:21:57Z</DateUtc></StartTime><FrequencyChanges><FrequencyChange><Frequency dt:dt="r8">10000000</Frequency><Timestamp dt:dt="r8">821279709133</Timestamp><Current dt:dt…	60	1.0.0.33	1	941658464	2.0.10.182	12-17-2021	2021-12-17 08:21:57	16:21:57	2.0.10.92	1	affpro	WordList	1	1	1	183	NULL		NULL	NULL	NULL	NULL	NULL	NULL	NULL	14	NULL	NULL	NULL	NULL	NULL	NULL	pra4	taskList2	动物转基因+高产的	NULL	NULL	NULL	NULL	NULL	NULL	NULL	NULL	NULL	NULL	NULL
大创GO-NOGO	1	3	<?xml version="1.0"?>\n<Clock xmlns:dt="urn:schemas-microsoft-com:datatypes"><Description dt:dt="string">E-Prime Primary Realtime Clock</Description><StartTime><Timestamp dt:dt="int">0</Timestamp><DateUtc dt:dt="string">2021-12-17T08:21:57Z</DateUtc></StartTime><FrequencyChanges><FrequencyChange><Frequency dt:dt="r8">10000000</Frequency><Timestamp dt:dt="r8">821279709133</Timestamp><Current dt:dt…	60	1.0.0.33	1	941658464	2.0.10.182	12-17-2021	2021-12-17 08:21:57	16:21:57	2.0.10.92	1	affpro	WordList	1	1	1	184	NULL		NULL	NULL	NULL	NULL	NULL	NULL	NULL	7	NULL	NULL	NULL	NULL	NULL	NULL	pra4	taskList2	抗虫害棉花+高科技的	NULL	NULL	NULL	NULL	NULL	NULL	NULL	NULL	NULL	NULL	NULL
大创GO-NOGO	1	3	<?xml version="1.0"?>\n<Clock xmlns:dt="urn:schemas-microsoft-com:datatypes"><Description dt:dt="string">E-Prime Primary Realtime Clock</Description><StartTime><Timestamp dt:dt="int">0</Timestamp><DateUtc dt:dt="string">2021-12-17T08:21:57Z</DateUtc></StartTime><FrequencyChanges><FrequencyChange><Frequency dt:dt="r8">10000000</Frequency><Timestamp dt:dt="r8">821279709133</Timestamp><Current dt:dt…	60	1.0.0.33	1	941658464	2.0.10.182	12-17-2021	2021-12-17 08:21:57	16:21:57	2.0.10.92	1	affpro	WordList	1	1	1	185	NULL		NULL	NULL	NULL	NULL	NULL	NULL	NULL	11	NULL	NULL	NULL	NULL	NULL	NULL	pra4	taskList2	转基因大豆+高科技的	NULL	NULL	NULL	NULL	NULL	NULL	NULL	NULL	NULL	NULL	NULL
大创GO-NOGO	1	3	<?xml version="1.0"?>\n<Clock xmlns:dt="urn:schemas-microsoft-com:datatypes"><Description dt:dt="string">E-Prime Primary Realtime Clock</Description><StartTime><Timestamp dt:dt="int">0</Timestamp><DateUtc dt:dt="string">2021-12-17T08:21:57Z</DateUtc></StartTime><FrequencyChanges><FrequencyChange><Frequency dt:dt="r8">10000000</Frequency><Timestamp dt:dt="r8">821279709133</Timestamp><Current dt:dt…	60	1.0.0.33	1	941658464	2.0.10.182	12-17-2021	2021-12-17 08:21:57	16:21:57	2.0.10.92	1	affpro	WordList	1	1	1	186	NULL		NULL	NULL	NULL	NULL	NULL	NULL	NULL	2	NULL	NULL	NULL	NULL	NULL	NULL	pra4	taskList2	转基因食物+高产的	NULL	NULL	NULL	NULL	NULL	NULL	NULL	NULL	NULL	NULL	NULL
大创GO-NOGO	1	3	<?xml version="1.0"?>\n<Clock xmlns:dt="urn:schemas-microsoft-com:datatypes"><Description dt:dt="string">E-Prime Primary Realtime Clock</Description><StartTime><Timestamp dt:dt="int">0</Timestamp><DateUtc dt:dt="string">2021-12-17T08:21:57Z</DateUtc></StartTime><FrequencyChanges><FrequencyChange><Frequency dt:dt="r8">10000000</Frequency><Timestamp dt:dt="r8">821279709133</Timestamp><Current dt:dt…	60	1.0.0.33	1	941658464	2.0.10.182	12-17-2021	2021-12-17 08:21:57	16:21:57	2.0.10.92	1	affpro	WordList	1	1	1	187	NULL	j	NULL	NULL	NULL	3	NULL	NULL	NULL	NULL	NULL	NULL	NULL	NULL	NULL	NULL	pra4	taskList2	转基因食物+非天然的	NULL	NULL	NULL	NULL	NULL	NULL	NULL	NULL	NULL	NULL	NULL
大创GO-NOGO	1	3	<?xml version="1.0"?>\n<Clock xmlns:dt="urn:schemas-microsoft-com:datatypes"><Description dt:dt="string">E-Prime Primary Realtime Clock</Description><StartTime><Timestamp dt:dt="int">0</Timestamp><DateUtc dt:dt="string">2021-12-17T08:21:57Z</DateUtc></StartTime><FrequencyChanges><FrequencyChange><Frequency dt:dt="r8">10000000</Frequency><Timestamp dt:dt="r8">821279709133</Timestamp><Current dt:dt…	60	1.0.0.33	1	941658464	2.0.10.182	12-17-2021	2021-12-17 08:21:57	16:21:57	2.0.10.92	1	affpro	WordList	1	1	1	188	NULL	j	NULL	NULL	NULL	15	NULL	NULL	NULL	NULL	NULL	NULL	NULL	NULL	NULL	NULL	pra4	taskList2	动物转基因+非天然的	NULL	NULL	NULL	NULL	NULL	NULL	NULL	NULL	NULL	NULL	NULL
大创GO-NOGO	1	4	<?xml version="1.0"?>\n<Clock xmlns:dt="urn:schemas-microsoft-com:datatypes"><Description dt:dt="string">E-Prime Primary Realtime Clock</Description><StartTime><Timestamp dt:dt="int">0</Timestamp><DateUtc dt:dt="string">2021-12-15T00:49:24Z</DateUtc></StartTime><FrequencyChanges><FrequencyChange><Frequency dt:dt="r8">10000000</Frequency><Timestamp dt:dt="r8">742030811387</Timestamp><Current dt:dt…	59.998	1.0.0.25	1	-997781102	2.0.10.182	12-15-2021	2021-12-15 00:49:24	08:49:24	2.0.10.92	1	affpro	WordList	1	1	1	1	f	NULL	NULL	NULL	NULL	NULL	8	NULL	NULL	NULL	1	1	1	NULL	NULL	NULL	pra1	practiceList1	抗虫害棉花+创新的	0	f	0	0	56479	1033		0	0	NULL	NULL
大创GO-NOGO	1	4	<?xml version="1.0"?>\n<Clock xmlns:dt="urn:schemas-microsoft-com:datatypes"><Description dt:dt="string">E-Prime Primary Realtime Clock</Description><StartTime><Timestamp dt:dt="int">0</Timestamp><DateUtc dt:dt="string">2021-12-15T00:49:24Z</DateUtc></StartTime><FrequencyChanges><FrequencyChange><Frequency dt:dt="r8">10000000</Frequency><Timestamp dt:dt="r8">742030811387</Timestamp><Current dt:dt…	59.998	1.0.0.25	1	-997781102	2.0.10.182	12-15-2021	2021-12-15 00:49:24	08:49:24	2.0.10.92	1	affpro	WordList	1	1	1	2		NULL	3	NULL	NULL	NULL	NULL	NULL	NULL	NULL	2	1	2	NULL	NULL	NULL	pra1	practiceList1	转基因食物+非天然的	0		0	0	58229	0	f	25	58254	NULL	NULL
大创GO-NOGO	1	4	<?xml version="1.0"?>\n<Clock xmlns:dt="urn:schemas-microsoft-com:datatypes"><Description dt:dt="string">E-Prime Primary Realtime Clock</Description><StartTime><Timestamp dt:dt="int">0</Timestamp><DateUtc dt:dt="string">2021-12-15T00:49:24Z</DateUtc></StartTime><FrequencyChanges><FrequencyChange><Frequency dt:dt="r8">10000000</Frequency><Timestamp dt:dt="r8">742030811387</Timestamp><Current dt:dt…	59.998	1.0.0.25	1	-997781102	2.0.10.182	12-15-2021	2021-12-15 00:49:24	08:49:24	2.0.10.92	1	affpro	WordList	1	1	1	3	f	NULL	NULL	NULL	NULL	NULL	7	NULL	NULL	NULL	1	2	3	NULL	NULL	NULL	pra1	practiceList1	抗虫害棉花+高科技的	0	f	0	0	59112	1017		0	0	NULL	NULL
大创GO-NOGO	1	4	<?xml version="1.0"?>\n<Clock xmlns:dt="urn:schemas-microsoft-com:datatypes"><Description dt:dt="string">E-Prime Primary Realtime Clock</Description><StartTime><Timestamp dt:dt="int">0</Timestamp><DateUtc dt:dt="string">2021-12-15T00:49:24Z</DateUtc></StartTime><FrequencyChanges><FrequencyChange><Frequency dt:dt="r8">10000000</Frequency><Timestamp dt:dt="r8">742030811387</Timestamp><Current dt:dt…	59.998	1.0.0.25	1	-997781102	2.0.10.182	12-15-2021	2021-12-15 00:49:24	08:49:24	2.0.10.92	1	affpro	WordList	1	1	1	4		NULL	7	NULL	NULL	NULL	NULL	NULL	NULL	NULL	2	2	4	NULL	NULL	NULL	pra1	practiceList1	抗虫害棉花+非天然的	1		0	0	60846	1016		0	0	NULL	NULL
大创GO-NOGO	1	4	<?xml version="1.0"?>\n<Clock xmlns:dt="urn:schemas-microsoft-com:datatypes"><Description dt:dt="string">E-Prime Primary Realtime Clock</Description><StartTime><Timestamp dt:dt="int">0</Timestamp><DateUtc dt:dt="string">2021-12-15T00:49:24Z</DateUtc></StartTime><FrequencyChanges><FrequencyChange><Frequency dt:dt="r8">10000000</Frequency><Timestamp dt:dt="r8">742030811387</Timestamp><Current dt:dt…	59.998	1.0.0.25	1	-997781102	2.0.10.182	12-15-2021	2021-12-15 00:49:24	08:49:24	2.0.10.92	1	affpro	WordList	1	1	1	5	f	NULL	NULL	NULL	NULL	NULL	5	NULL	NULL	NULL	1	3	5	NULL	NULL	NULL	pra1	practiceList1	抗虫害棉花+科学的	1	f	0	0	62579	0	f	445	63024	NULL	NULL
大创GO-NOGO	1	4	<?xml version="1.0"?>\n<Clock xmlns:dt="urn:schemas-microsoft-com:datatypes"><Description dt:dt="string">E-Prime Primary Realtime Clock</Description><StartTime><Timestamp dt:dt="int">0</Timestamp><DateUtc dt:dt="string">2021-12-15T00:49:24Z</DateUtc></StartTime><FrequencyChanges><FrequencyChange><Frequency dt:dt="r8">10000000</Frequency><Timestamp dt:dt="r8">742030811387</Timestamp><Current dt:dt…	59.998	1.0.0.25	1	-997781102	2.0.10.182	12-15-2021	2021-12-15 00:49:24	08:49:24	2.0.10.92	1	affpro	WordList	1	1	1	6		NULL	9	NULL	NULL	NULL	NULL	NULL	NULL	NULL	2	3	6	NULL	NULL	NULL	pra1	practiceList1	转基因大豆+不成熟的	1		0	0	63796	1016		0	0	NULL	NULL
大创GO-NOGO	1	4	<?xml version="1.0"?>\n<Clock xmlns:dt="urn:schemas-microsoft-com:datatypes"><Description dt:dt="string">E-Prime Primary Realtime Clock</Description><StartTime><Timestamp dt:dt="int">0</Timestamp><DateUtc dt:dt="string">2021-12-15T00:49:24Z</DateUtc></StartTime><FrequencyChanges><FrequencyChange><Frequency dt:dt="r8">10000000</Frequency><Timestamp dt:dt="r8">742030811387</Timestamp><Current dt:dt…	59.998	1.0.0.25	1	-997781102	2.0.10.182	12-15-2021	2021-12-15 00:49:24	08:49:24	2.0.10.92	1	affpro	WordList	1	1	1	7	f	NULL	NULL	NULL	NULL	NULL	3	NULL	NULL	NULL	1	4	7	NULL	NULL	NULL	pra1	practiceList1	转基因食物+高科技的	0	f	0	0	65529	1017		0	0	NULL	NULL
大创GO-NOGO	1	4	<?xml version="1.0"?>\n<Clock xmlns:dt="urn:schemas-microsoft-com:datatypes"><Description dt:dt="string">E-Prime Primary Realtime Clock</Description><StartTime><Timestamp dt:dt="int">0</Timestamp><DateUtc dt:dt="string">2021-12-15T00:49:24Z</DateUtc></StartTime><FrequencyChanges><FrequencyChange><Frequency dt:dt="r8">10000000</Frequency><Timestamp dt:dt="r8">742030811387</Timestamp><Current dt:dt…	59.998	1.0.0.25	1	-997781102	2.0.10.182	12-15-2021	2021-12-15 00:49:24	08:49:24	2.0.10.92	1	affpro	WordList	1	1	1	8		NULL	4	NULL	NULL	NULL	NULL	NULL	NULL	NULL	2	4	8	NULL	NULL	NULL	pra1	practiceList1	转基因食物+有争议的	1		0	0	67262	1017		0	0	NULL	NULL
大创GO-NOGO	1	4	<?xml version="1.0"?>\n<Clock xmlns:dt="urn:schemas-microsoft-com:datatypes"><Description dt:dt="string">E-Prime Primary Realtime Clock</Description><StartTime><Timestamp dt:dt="int">0</Timestamp><DateUtc dt:dt="string">2021-12-15T00:49:24Z</DateUtc></StartTime><FrequencyChanges><FrequencyChange><Frequency dt:dt="r8">10000000</Frequency><Timestamp dt:dt="r8">742030811387</Timestamp><Current dt:dt…	59.998	1.0.0.25	1	-997781102	2.0.10.182	12-15-2021	2021-12-15 00:49:24	08:49:24	2.0.10.92	1	affpro	WordList	1	1	1	9	f	NULL	NULL	NULL	NULL	NULL	10	NULL	NULL	NULL	1	5	9	NULL	NULL	NULL	pra1	practiceList1	转基因大豆+高产的	0	f	0	17	69012	1017		0	0	NULL	NULL
大创GO-NOGO	1	4	<?xml version="1.0"?>\n<Clock xmlns:dt="urn:schemas-microsoft-com:datatypes"><Description dt:dt="string">E-Prime Primary Realtime Clock</Description><StartTime><Timestamp dt:dt="int">0</Timestamp><DateUtc dt:dt="string">2021-12-15T00:49:24Z</DateUtc></StartTime><FrequencyChanges><FrequencyChange><Frequency dt:dt="r8">10000000</Frequency><Timestamp dt:dt="r8">742030811387</Timestamp><Current dt:dt…	59.998	1.0.0.25	1	-997781102	2.0.10.182	12-15-2021	2021-12-15 00:49:24	08:49:24	2.0.10.92	1	affpro	WordList	1	1	1	10		NULL	11	NULL	NULL	NULL	NULL	NULL	NULL	NULL	2	5	10	NULL	NULL	NULL	pra1	practiceList1	转基因大豆+非天然的	0		1	0	70745	0	f	462	71207	NULL	NULL
大创GO-NOGO	1	4	<?xml version="1.0"?>\n<Clock xmlns:dt="urn:schemas-microsoft-com:datatypes"><Description dt:dt="string">E-Prime Primary Realtime Clock</Description><StartTime><Timestamp dt:dt="int">0</Timestamp><DateUtc dt:dt="string">2021-12-15T00:49:24Z</DateUtc></StartTime><FrequencyChanges><FrequencyChange><Frequency dt:dt="r8">10000000</Frequency><Timestamp dt:dt="r8">742030811387</Timestamp><Current dt:dt…	59.998	1.0.0.25	1	-997781102	2.0.10.182	12-15-2021	2021-12-15 00:49:24	08:49:24	2.0.10.92	1	affpro	WordList	1	1	1	11	f	NULL	NULL	NULL	NULL	NULL	12	NULL	NULL	NULL	1	6	11	NULL	NULL	NULL	pra1	practiceList1	转基因大豆+创新的	1	f	1	0	71945	0	f	792	72737	NULL	NULL
大创GO-NOGO	1	4	<?xml version="1.0"?>\n<Clock xmlns:dt="urn:schemas-microsoft-com:datatypes"><Description dt:dt="string">E-Prime Primary Realtime Clock</Description><StartTime><Timestamp dt:dt="int">0</Timestamp><DateUtc dt:dt="string">2021-12-15T00:49:24Z</DateUtc></StartTime><FrequencyChanges><FrequencyChange><Frequency dt:dt="r8">10000000</Frequency><Timestamp dt:dt="r8">742030811387</Timestamp><Current dt:dt…	59.998	1.0.0.25	1	-997781102	2.0.10.182	12-15-2021	2021-12-15 00:49:24	08:49:24	2.0.10.92	1	affpro	WordList	1	1	1	12		NULL	10	NULL	NULL	NULL	NULL	NULL	NULL	NULL	2	6	12	NULL	NULL	NULL	pra1	practiceList1	转基因大豆+高风险的	0		0	0	73479	0	f	602	74081	NULL	NULL
大创GO-NOGO	1	4	<?xml version="1.0"?>\n<Clock xmlns:dt="urn:schemas-microsoft-com:datatypes"><Description dt:dt="string">E-Prime Primary Realtime Clock</Description><StartTime><Timestamp dt:dt="int">0</Timestamp><DateUtc dt:dt="string">2021-12-15T00:49:24Z</DateUtc></StartTime><FrequencyChanges><FrequencyChange><Frequency dt:dt="r8">10000000</Frequency><Timestamp dt:dt="r8">742030811387</Timestamp><Current dt:dt…	59.998	1.0.0.25	1	-997781102	2.0.10.182	12-15-2021	2021-12-15 00:49:24	08:49:24	2.0.10.92	1	affpro	WordList	1	1	1	13	f	NULL	NULL	NULL	NULL	NULL	14	NULL	NULL	NULL	1	7	13	NULL	NULL	NULL	pra1	practiceList1	动物转基因+高产的	0	f	0	0	74812	1017		0	0	NULL	NULL
大创GO-NOGO	1	4	<?xml version="1.0"?>\n<Clock xmlns:dt="urn:schemas-microsoft-com:datatypes"><Description dt:dt="string">E-Prime Primary Realtime Clock</Description><StartTime><Timestamp dt:dt="int">0</Timestamp><DateUtc dt:dt="string">2021-12-15T00:49:24Z</DateUtc></StartTime><FrequencyChanges><FrequencyChange><Frequency dt:dt="r8">10000000</Frequency><Timestamp dt:dt="r8">742030811387</Timestamp><Current dt:dt…	59.998	1.0.0.25	1	-997781102	2.0.10.182	12-15-2021	2021-12-15 00:49:24	08:49:24	2.0.10.92	1	affpro	WordList	1	1	1	14		NULL	6	NULL	NULL	NULL	NULL	NULL	NULL	NULL	2	7	14	NULL	NULL	NULL	pra1	practiceList1	抗虫害棉花+高风险的	0		0	0	76545	0	f	701	77246	NULL	NULL
大创GO-NOGO	1	4	<?xml version="1.0"?>\n<Clock xmlns:dt="urn:schemas-microsoft-com:datatypes"><Description dt:dt="string">E-Prime Primary Realtime Clock</Description><StartTime><Timestamp dt:dt="int">0</Timestamp><DateUtc dt:dt="string">2021-12-15T00:49:24Z</DateUtc></StartTime><FrequencyChanges><FrequencyChange><Frequency dt:dt="r8">10000000</Frequency><Timestamp dt:dt="r8">742030811387</Timestamp><Current dt:dt…	59.998	1.0.0.25	1	-997781102	2.0.10.182	12-15-2021	2021-12-15 00:49:24	08:49:24	2.0.10.92	1	affpro	WordList	1	1	1	15	f	NULL	NULL	NULL	NULL	NULL	1	NULL	NULL	NULL	1	8	15	NULL	NULL	NULL	pra1	practiceList1	转基因食物+科学的	1	f	0	0	77979	0	f	673	78652	NULL	NULL
大创GO-NOGO	1	4	<?xml version="1.0"?>\n<Clock xmlns:dt="urn:schemas-microsoft-com:datatypes"><Description dt:dt="string">E-Prime Primary Realtime Clock</Description><StartTime><Timestamp dt:dt="int">0</Timestamp><DateUtc dt:dt="string">2021-12-15T00:49:24Z</DateUtc></StartTime><FrequencyChanges><FrequencyChange><Frequency dt:dt="r8">10000000</Frequency><Timestamp dt:dt="r8">742030811387</Timestamp><Current dt:dt…	59.998	1.0.0.25	1	-997781102	2.0.10.182	12-15-2021	2021-12-15 00:49:24	08:49:24	2.0.10.92	1	affpro	WordList	1	1	1	16		NULL	5	NULL	NULL	NULL	NULL	NULL	NULL	NULL	2	8	16	NULL	NULL	NULL	pra1	practiceList1	抗虫害棉花+不成熟的	1		0	0	79395	1017		0	0	NULL	NULL
[truncated: 11,469 more rows]
[truncated: 33 more columns]

## Sheet: Processed data
Serial number	educational level(undergraduate1 graduate2)	age	Gender (Male 1 Female 2)	Cognitive level	Hit rate	Z-score	false alarm rate	Z-score	The negative association d' value	Hit rate	Z-score	false alarm rate	Z-score	The positive association d' value	the implicit discrimination index D′
[truncated: 64 more rows]
